# Supplementary material for: Cell-surface tethered promiscuous biotinylators enable comparative small-scale surface proteomic analysis of human extracellular vesicles and cells
Source: eLife journal article supplement (doi:10.7554/elife.73982), 2022-03-04
Supplement: supp [file elife-73982-supp-v1.zip]

# A

Upregulated in Control Cell

Upregulated in Control EV

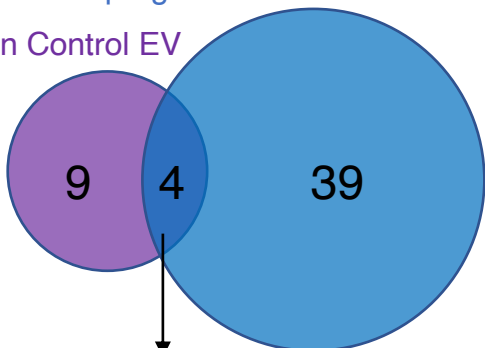

IFITM3  
BST2  
MFGE8  
HLA-B

# B

Upregulated in Myc Cell

Upregulated in Myc EV

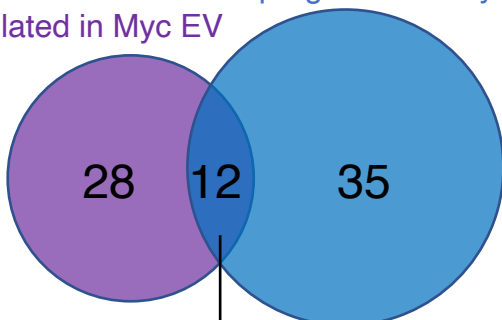

|         |           |
|---------|-----------|
| ANPEP   | NT5E      |
| SLC38A5 | TNFRSF10B |
| FN1     | ADGRE2    |
| CDH13   | SLC6A13   |
| VIM     | TENM3     |
| CA12    | TRPM4     |
