# Supplementary material for: Cell-surface tethered promiscuous biotinylators enable comparative small-scale surface proteomic analysis of human extracellular vesicles and cells
Source: eLife journal article supplement (doi:10.7554/elife.73982), 2022-03-04
Supplement: supp [file elife-73982-supp-v1.zip]

A

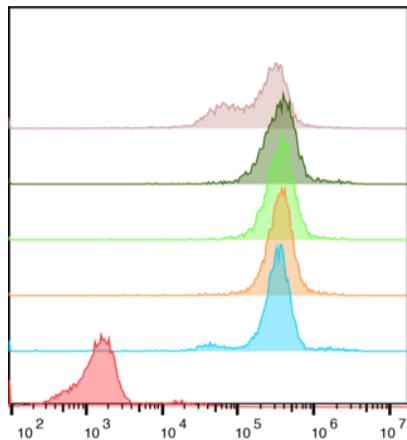

Streptavidin-647

|   | Sample Name         |
|---|---------------------|
| ■ | Control             |
| ■ | 0.125 $\mu$ M APEX2 |
| ■ | 0.25 $\mu$ M APEX2  |
| ■ | 0.5 $\mu$ M APEX2   |
| ■ | 1 $\mu$ M APEX2     |
| ■ | 2 $\mu$ M APEX2     |

B

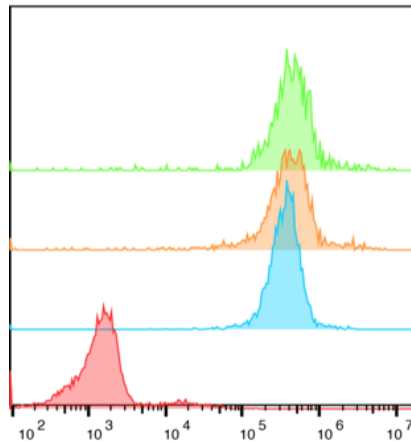

Streptavidin-647

|   | Sample Name |
|---|-------------|
| ■ | Control     |
| ■ | 250K Cells  |
| ■ | 500K Cells  |
| ■ | 1M Cells    |
