# Supplementary material for: Cell-surface tethered promiscuous biotinylators enable comparative small-scale surface proteomic analysis of human extracellular vesicles and cells
Source: eLife journal article supplement (doi:10.7554/elife.73982), 2022-03-04
Supplement: supp [file elife-73982-supp-v1.zip]

Archive with 25 entries (25 files):
- elife_poa_e73982_Transparent_Reporting_File.docx
- elife_poa_e73982_Source_data_1.zip
- elife_poa_e73982_Figure_2_source_data_2.csv
- elife_poa_e73982_Figure_2_figure_supplement_3_source_data_1.csv
- elife_poa_e73982_Figure_3_source_data_2.xlsx
- elife_poa_e73982_Figure_3_source_data_3.xlsx
- elife_poa_e73982_Figure_3_figure_supplement_1_source_data_1.csv
- elife_poa_e73982_Figure_4_source_data_2.xlsx
- elife_poa_e73982_Figure_4_source_data_3.xlsx
- elife_poa_e73982_Figure_4_source_data_4.xlsx
- elife_poa_e73982_Figure_5_source_data_2.xlsx
- elife_poa_e73982_Figure_5_source_data_3.xlsx
- elife_poa_e73982_Figure_1_figure_supplement_1.pdf
- elife_poa_e73982_Figure_1_figure_supplement_2.pdf
- elife_poa_e73982_Figure_1_figure_supplement_3.pdf
- elife_poa_e73982_Figure_2_figure_supplement_1.pdf
- elife_poa_e73982_Figure_2_figure_supplement_2.pdf
- elife_poa_e73982_Figure_2_figure_supplement_3.pdf
- elife_poa_e73982_Figure_2_figure_supplement_4.pdf
- elife_poa_e73982_Figure_2_figure_supplement_5.pdf
- elife_poa_e73982_Figure_2_figure_supplement_6.pdf
- elife_poa_e73982_Figure_3_figure_supplement_1.pdf
- elife_poa_e73982_Figure_3_figure_supplement_2.pdf
- elife_poa_e73982_Figure_4_figure_supplement_1.pdf
- elife_poa_e73982_Figure_5_figure_supplement_1.pdf
