# Supplementary material for: Cell-surface tethered promiscuous biotinylators enable comparative small-scale surface proteomic analysis of human extracellular vesicles and cells
Source: eLife journal article supplement (doi:10.7554/elife.73982), 2022-03-04
Supplement: supp [file elife-73982-supp-v1.zip › elife_poa_e73982_Figure_1_figure_supplement_3.pdf]

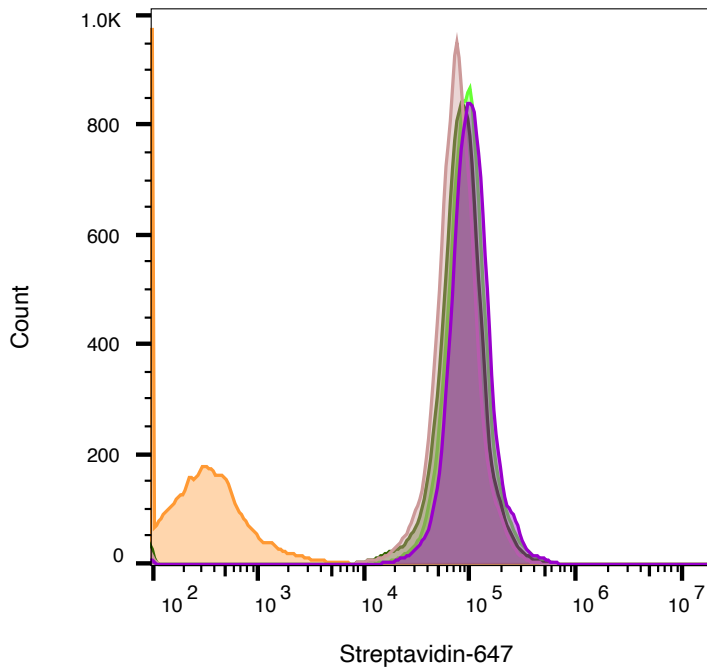

|             | Sample Name   |
|-------------|---------------|
| <div></div> | 30 minutes    |
| <div></div> | 15 minutes    |
| <div></div> | 5 minutes     |
| <div></div> | No incubation |
| <div></div> | Cell only     |
