# Supplementary material for: Cell-surface tethered promiscuous biotinylators enable comparative small-scale surface proteomic analysis of human extracellular vesicles and cells
Source: eLife journal article supplement (doi:10.7554/elife.73982), 2022-03-04
Supplement: supp [file elife-73982-supp-v1.zip › elife_poa_e73982_Figure_2_figure_supplement_3_source_data_1.csv]

Protein Group,Top,Accession,-10LgP,#Peptides,Area DNA 1 min 1,Area DNA 1 min 2,Area DNA 2 min 1,Area DNA 2 min 2,Area WGA 1 min 1,Area WGA 1 min 2,Area WGA 2 min 1,Area WGA 2 min 2,#Unique,#Spec DNA 1 min 1,#Spec DNA 1 min 2,#Spec DNA 2 min 1,#Spec DNA 2 min 2,#Spec WGA 1 min 1,#Spec WGA 1 min 2,#Spec WGA 2 min 1,#Spec WGA 2 min 2,PTM,Average Mass,Description
904,TRUE,P30520	PURA2_HUMAN,87.83918,2,,,,,212.27292,,,130.62929,2,,,,,1,,1,1,,50097.36,Adenylosuccinate synthetase isozyme 2 OS=Homo sapiens OX=9606 GN=ADSS2 PE=1 SV=3
463,TRUE,P01889	HLAB_HUMAN,253.31514,9,13115.432,9038.984,6375.5176,11318.984,5949.9224,6525.0625,9359.17,10744.141,2,23,19,15,18,11,17,18,19,Carbamidomethylation,40460.074,"HLA class I histocompatibility antigen, B alpha chain OS=Homo sapiens OX=9606 GN=HLA-B PE=1 SV=3"
411,TRUE,P11166	GTR1_HUMAN,240.80853,7,60878.7,43917.65,33661.62,58475.516,51963.418,60428.36,68254.81,80660.125,7,27,21,20,28,25,24,28,27,Oxidation (M),54083.77,"Solute carrier family 2, facilitated glucose transporter member 1 OS=Homo sapiens OX=9606 GN=SLC2A1 PE=1 SV=2"
709,TRUE,O14735	CDIPT_HUMAN,118.66287,2,198.36783,137.04703,,,560.8397,276.18506,930.3999,1154.1461,2,1,4,3,1,3,2,2,4,Oxidation (M),23538.803,CDP-diacylglycerol--inositol 3-phosphatidyltransferase OS=Homo sapiens OX=9606 GN=CDIPT PE=1 SV=1
710,TRUE,P38398	BRCA1_HUMAN,140.32292,4,,,,,,,,129.63055,4,,,,,2,2,2,2,Oxidation (M),207720.84,Breast cancer type 1 susceptibility protein OS=Homo sapiens OX=9606 GN=BRCA1 PE=1 SV=2
958,TRUE,Q92747	ARC1A_HUMAN,83.91714,2,,92.71564,,325.20343,,,,,2,,1,1,1,,,,,,41569.29,Actin-related protein 2/3 complex subunit 1A OS=Homo sapiens OX=9606 GN=ARPC1A PE=1 SV=2
768,TRUE,Q8NFH5	NUP35_HUMAN,165.77193,3,982.58044,710.391,150.6594,594.1737,595.03467,725.01465,1050.2959,1587.9497,3,3,3,2,3,6,7,4,2,Oxidation (M),34773.754,Nucleoporin NUP35 OS=Homo sapiens OX=9606 GN=NUP35 PE=1 SV=1
832,TRUE,Q9Y2A9	B3GN3_HUMAN,118.67757,3,882.1323,308.41415,,495.1179,,411.1043,377.4978,740.6107,3,2,1,1,2,2,4,3,3,,42534.164,"N-acetyllactosaminide beta-1,3-N-acetylglucosaminyltransferase 3 OS=Homo sapiens OX=9606 GN=B3GNT3 PE=1 SV=2"
808,TRUE,Q9NYJ8	TAB2_HUMAN,127.53407,3,,,,,,,,180.01006,3,,,,2,1,2,,3,Acetylation (N-term); Oxidation (M),76494.14,TGF-beta-activated kinase 1 and MAP3K7-binding protein 2 OS=Homo sapiens OX=9606 GN=TAB2 PE=1 SV=1
345,TRUE,Q9Y3L5	RAP2C_HUMAN,212.41771,10,,,,,,,1004.47107,423.46777,4,9,7,8,11,7,8,11,12,Carbamidomethylation; Oxidation (M),20744.758,Ras-related protein Rap-2c OS=Homo sapiens OX=9606 GN=RAP2C PE=1 SV=1
592,TRUE,P62330	ARF6_HUMAN,146.98323,5,1403.2548,545.3982,1548.4824,2314.8364,1365.758,1645.4296,4048.46,5133.5435,5,5,6,7,8,5,5,7,6,Oxidation (M),20082.152,ADP-ribosylation factor 6 OS=Homo sapiens OX=9606 GN=ARF6 PE=1 SV=2
444,TRUE,Q8NF37	PCAT1_HUMAN,209.6348,10,8004.415,6831.503,4239.6543,8136.3486,4845.611,4634.471,5115.257,8061.849,10,12,12,10,12,11,4,9,10,Carbamidomethylation; Oxidation (M),59151.35,Lysophosphatidylcholine acyltransferase 1 OS=Homo sapiens OX=9606 GN=LPCAT1 PE=1 SV=2
705,FALSE,Q9Y5E1	PCDB9_HUMAN,89.42716,2,297.44473,,,176.94254,,,,520.02356,2,1,1,,1,,,,2,,87099.11,Protocadherin beta-9 OS=Homo sapiens OX=9606 GN=PCDHB9 PE=2 SV=2
870,TRUE,Q9BV57	MTND_HUMAN,98.13043,2,,,,,384.27374,479.51056,443.7431,436.68076,2,,,,,2,2,2,3,Oxidation (M),21498.387,"1,2-dihydroxy-3-keto-5-methylthiopentene dioxygenase OS=Homo sapiens OX=9606 GN=ADI1 PE=1 SV=1"
406,TRUE,P28482	MK01_HUMAN,203.43417,10,,,,516.9412,4827.5933,4632.739,7285.7153,10590.156,10,,,2,2,9,12,12,15,Oxidation (M); Carbamidomethylation,41389.703,Mitogen-activated protein kinase 1 OS=Homo sapiens OX=9606 GN=MAPK1 PE=1 SV=3
888,TRUE,P63098	CANB1_HUMAN,66.02292,2,,,,359.834,,,277.07486,295.70218,2,,,,2,,,1,1,,19299.902,Calcineurin subunit B type 1 OS=Homo sapiens OX=9606 GN=PPP3R1 PE=1 SV=2
924,TRUE,Q6RW13	ATRAP_HUMAN,120.62253,2,263.80945,155.76633,,178.55132,,139.32355,131.22339,,2,2,2,2,4,2,2,2,3,,17419.203,Type-1 angiotensin II receptor-associated protein OS=Homo sapiens OX=9606 GN=AGTRAP PE=1 SV=1
647,TRUE,P30419	NMT1_HUMAN,132.4069,4,,5114.143,,,,7666.7593,435.7314,10793.16,4,,1,,,1,1,4,4,Oxidation (M),56806.18,Glycylpeptide N-tetradecanoyltransferase 1 OS=Homo sapiens OX=9606 GN=NMT1 PE=1 SV=2
276,TRUE,Q8TCG1	CIP2A_HUMAN,213.10753,15,,,,,1731.3896,1916.6967,3992.7498,6055.5166,15,,,2,3,12,13,15,15,Oxidation (M),102184.99,Protein CIP2A OS=Homo sapiens OX=9606 GN=CIP2A PE=1 SV=2
780,TRUE,Q8TCG2	P4K2B_HUMAN,107.94942,4,287.75,,,177.76736,,,187.7591,,4,7,1,,2,,1,3,1,,54744.207,Phosphatidylinositol 4-kinase type 2-beta OS=Homo sapiens OX=9606 GN=PI4K2B PE=1 SV=1
310,TRUE,P98194	AT2C1_HUMAN,218.4412,11,20277.504,966.0823,127.010796,872.1334,360.00696,505.37042,970.41907,2222.257,11,9,8,4,7,2,7,11,8,Oxidation (M); Carbamidomethylation,100577.27,Calcium-transporting ATPase type 2C member 1 OS=Homo sapiens OX=9606 GN=ATP2C1 PE=1 SV=3
193,TRUE,O43815	STRN_HUMAN,295.5459,20,5075.1626,999.5463,732.1642,4359.0303,2210.2957,3143.2576,3556.284,3865.1343,18,20,11,13,22,18,20,22,22,Carbamidomethylation; Acetylation (N-term); Oxidation (M),86132.11,Striatin OS=Homo sapiens OX=9606 GN=STRN PE=1 SV=4
755,TRUE,Q08554	DSC1_HUMAN,112.47232,4,875.35803,349.74155,,,,,,,4,4,7,,,,,,1,,99986.83,Desmocollin-1 OS=Homo sapiens OX=9606 GN=DSC1 PE=1 SV=2
753,TRUE,P31641	SC6A6_HUMAN,118.09262,4,1487.827,336.02106,,280.12003,611.8291,385.29913,,1062.4666,4,7,5,3,5,3,2,1,1,Oxidation (M),69830.05,Sodium- and chloride-dependent taurine transporter OS=Homo sapiens OX=9606 GN=SLC6A6 PE=1 SV=2
246,TRUE,Q92692	NECT2_HUMAN,279.12054,14,21415.26,14854.246,9590.025,17748.516,13335.588,15721.682,21045.922,30988,14,33,32,24,30,22,24,41,32,Oxidation (M); Carbamidomethylation,57742.03,Nectin-2 OS=Homo sapiens OX=9606 GN=NECTIN2 PE=1 SV=1
335,TRUE,Q16513	PKN2_HUMAN,201.90147,13,,,,,129.54088,462.00452,1903.5043,1067.7655,12,,,1,1,3,6,10,10,,112034.6,Serine/threonine-protein kinase N2 OS=Homo sapiens OX=9606 GN=PKN2 PE=1 SV=1
407,TRUE,Q8WXX5	DNJC9_HUMAN,211.79459,10,641.24,457.23132,1668.2147,4717.8315,3598.6562,4684.8633,5106.351,3707.3987,10,4,4,11,16,13,11,14,12,Oxidation (M); Carbamidomethylation,29909.709,DnaJ homolog subfamily C member 9 OS=Homo sapiens OX=9606 GN=DNAJC9 PE=1 SV=1
258,TRUE,P01130	LDLR_HUMAN,299.59848,15,21320.012,16193.888,7480.1074,16504.303,13504.066,15492.606,19847.016,21314.197,15,26,31,23,21,25,21,32,25,Oxidation (M); Carbamidomethylation,95376.016,Low-density lipoprotein receptor OS=Homo sapiens OX=9606 GN=LDLR PE=1 SV=1
184,TRUE,P04626	ERBB2_HUMAN,284.99323,17,9319.663,7925.817,2382.8735,8975.049,7542.5054,10840.912,11216.602,17638.93,15,28,22,20,21,23,22,28,36,Oxidation (M); Carbamidomethylation,137910.48,Receptor tyrosine-protein kinase erbB-2 OS=Homo sapiens OX=9606 GN=ERBB2 PE=1 SV=1
737,TRUE,Q02487	DSC2_HUMAN,108.8651,4,580.86237,363.69763,,164.60373,,,,,4,3,2,1,1,,,,,Oxidation (M),99961.68,Desmocollin-2 OS=Homo sapiens OX=9606 GN=DSC2 PE=1 SV=1
948,TRUE,Q15836	VAMP3_HUMAN,88.61824,2,,,,234.61797,,,,,2,1,1,,4,,,,1,Oxidation (M),11309.086,Vesicle-associated membrane protein 3 OS=Homo sapiens OX=9606 GN=VAMP3 PE=1 SV=3
636,TRUE,O15144	ARPC2_HUMAN,148.5106,6,1174.9058,,,807.01575,,,82.10913,198.28607,6,5,4,2,6,,2,3,3,,34333.016,Actin-related protein 2/3 complex subunit 2 OS=Homo sapiens OX=9606 GN=ARPC2 PE=1 SV=1
486,TRUE,Q96S59	RANB9_HUMAN,195.66153,7,13915.868,286.46274,131.15298,803.574,941.9435,1582.9885,515.8404,1200.2075,7,6,2,2,8,8,4,6,7,Oxidation (M); Carbamidomethylation,77847.305,Ran-binding protein 9 OS=Homo sapiens OX=9606 GN=RANBP9 PE=1 SV=1
363,TRUE,P61225	RAP2B_HUMAN,229.99704,10,5161.6963,2726.6182,1973.284,3775.5723,1750.8394,2502.1802,3529.6113,5426,4,12,8,11,15,9,10,14,14,Carbamidomethylation; Oxidation (M),20504.354,Ras-related protein Rap-2b OS=Homo sapiens OX=9606 GN=RAP2B PE=1 SV=1
37,FALSE,P51805	PLXA3_HUMAN,199.98119,11,9765.804,5127.9146,4577.0547,9519.325,8877.991,9839.445,11170.533,9765.6875,5,21,20,20,14,25,16,18,21,Oxidation (M),207702.83,Plexin-A3 OS=Homo sapiens OX=9606 GN=PLXNA3 PE=1 SV=2
333,TRUE,P56199	ITA1_HUMAN,230.10394,12,1109.5919,384.46405,,531.7391,519.96136,755.57825,1887.5237,2723.6414,12,7,6,3,9,7,12,10,18,Carbamidomethylation; Oxidation (M),130847.78,Integrin alpha-1 OS=Homo sapiens OX=9606 GN=ITGA1 PE=1 SV=2
778,TRUE,Q8N5I2	ARRD1_HUMAN,112.13653,4,,,,121.51192,293.55005,,529.5551,826.2985,4,,,,1,1,,3,4,,45981.406,Arrestin domain-containing protein 1 OS=Homo sapiens OX=9606 GN=ARRDC1 PE=1 SV=1
219,TRUE,Q9UKV3	ACINU_HUMAN,246.51015,19,4274.636,6562.1313,2062.352,5540.3755,2289.579,2213.628,4488.6216,5190.981,19,16,13,13,16,12,15,12,17,Acetylation (N-term); Carbamidomethylation; Oxidation (M),151861.52,Apoptotic chromatin condensation inducer in the nucleus OS=Homo sapiens OX=9606 GN=ACIN1 PE=1 SV=2
399,TRUE,Q9UL25	RAB21_HUMAN,244.12222,10,5527.568,2804.5154,1347.9081,4058.1816,754.4445,651.7787,2766.6003,3983.3315,9,14,14,12,21,9,10,10,11,Acetylation (N-term); Carbamidomethylation; Oxidation (M),24347.564,Ras-related protein Rab-21 OS=Homo sapiens OX=9606 GN=RAB21 PE=1 SV=3
926,TRUE,Q8NBJ4	GOLM1_HUMAN,97.58722,2,,,,,,,161.71237,138.15878,2,1,1,,1,,2,2,2,,45333.24,Golgi membrane protein 1 OS=Homo sapiens OX=9606 GN=GOLM1 PE=1 SV=1
340,TRUE,O00299	CLIC1_HUMAN,254.12064,13,2986.6006,1364.624,4394.334,8102.8164,12352.078,5658.0825,13364.008,15309.254,12,7,4,9,12,21,11,11,13,Acetylation (N-term); Carbamidomethylation; Oxidation (M),26922.723,Chloride intracellular channel protein 1 OS=Homo sapiens OX=9606 GN=CLIC1 PE=1 SV=4
736,TRUE,P24666	PPAC_HUMAN,182.5055,4,1398.9432,2076.7102,915.04895,3514.3018,5918.595,5863.486,5804.928,6485.5806,4,6,5,5,4,8,6,8,8,,18042.479,Low molecular weight phosphotyrosine protein phosphatase OS=Homo sapiens OX=9606 GN=ACP1 PE=1 SV=3
134,TRUE,P22223	CADH3_HUMAN,329.62216,25,60289.77,40828.293,17097.645,36423.61,32176.5,41236.4,42081.344,53604.914,22,62,60,44,60,55,57,56,58,Oxidation (M); Carbamidomethylation,91418.4,Cadherin-3 OS=Homo sapiens OX=9606 GN=CDH3 PE=1 SV=2
882,TRUE,Q14680	MELK_HUMAN,133.02785,3,83.524376,,,,,,317.66113,737.94794,3,1,,,3,2,2,3,1,Oxidation (M),74642.086,Maternal embryonic leucine zipper kinase OS=Homo sapiens OX=9606 GN=MELK PE=1 SV=3
920,TRUE,P46019	KPB2_HUMAN,68.43914,2,,,,,,,219.15237,200.23778,2,,,,,,1,2,2,,138408.03,"Phosphorylase b kinase regulatory subunit alpha, liver isoform OS=Homo sapiens OX=9606 GN=PHKA2 PE=1 SV=1"
288,TRUE,P11413	G6PD_HUMAN,258.3948,14,1226.4751,275.1203,,1615.4569,4099.8823,5258.665,4052.7861,3276.718,14,13,3,7,11,14,16,17,17,Oxidation (M); Carbamidomethylation,59256.746,Glucose-6-phosphate 1-dehydrogenase OS=Homo sapiens OX=9606 GN=G6PD PE=1 SV=4
378,TRUE,Q9UEY8	ADDG_HUMAN,193.43643,10,770.57513,535.3351,1191.8962,1958.3237,2108.5747,898.19336,2340.9634,2551.0369,10,4,5,5,8,6,6,12,8,Oxidation (M),79154.64,Gamma-adducin OS=Homo sapiens OX=9606 GN=ADD3 PE=1 SV=1
154,TRUE,P50570	DYN2_HUMAN,299.42477,22,893.4127,543.24896,1825.6497,5064.7026,3631.6309,4202.235,14052.462,16215.984,22,5,7,12,21,15,18,24,32,Oxidation (M); Carbamidomethylation,98064.305,Dynamin-2 OS=Homo sapiens OX=9606 GN=DNM2 PE=1 SV=2
699,TRUE,Q9UNZ2	NSF1C_HUMAN,108.882416,4,,,,405.63983,79.054504,,,,4,,,,4,1,,,1,,40572.832,NSFL1 cofactor p47 OS=Homo sapiens OX=9606 GN=NSFL1C PE=1 SV=2
781,TRUE,O15431	COPT1_HUMAN,113.25076,2,,443.9788,,743.64044,619.8862,1273.1201,2800.473,2179.1553,2,2,2,1,2,1,1,9,8,Carbamidomethylation; Oxidation (M),21090.621,High affinity copper uptake protein 1 OS=Homo sapiens OX=9606 GN=SLC31A1 PE=1 SV=1
180,TRUE,P49023	PAXI_HUMAN,317.8363,16,3791.8599,1508.6133,6737.7627,11604.02,20898.912,20778.262,29084.604,31464.086,16,22,25,30,42,41,39,40,43,Oxidation (M); Acetylation (N-term); Carbamidomethylation,64505.305,Paxillin OS=Homo sapiens OX=9606 GN=PXN PE=1 SV=3
557,TRUE,Q96BM9	ARL8A_HUMAN,193.17717,6,3416.4265,3619.9556,2203.3547,5228.4053,,242.60808,860.4384,2228.8813,6,9,7,9,12,3,3,4,5,Oxidation (M),21415.89,ADP-ribosylation factor-like protein 8A OS=Homo sapiens OX=9606 GN=ARL8A PE=1 SV=1
39,TRUE,O75165	DJC13_HUMAN,389.19183,54,17926.021,7559.468,3608.3867,8807.837,8065.8247,5888.521,9604.739,17778.549,54,67,51,45,49,37,41,46,59,Oxidation (M); Carbamidomethylation,254414.89,DnaJ homolog subfamily C member 13 OS=Homo sapiens OX=9606 GN=DNAJC13 PE=1 SV=5
228,TRUE,Q8N884	CGAS_HUMAN,230.38248,16,1577.2709,1140.2297,503.0196,1299.1309,2466.525,4467.58,6904.367,8950.283,16,5,7,5,13,8,16,21,19,Oxidation (M); Acetylation (N-term),58814.473,Cyclic GMP-AMP synthase OS=Homo sapiens OX=9606 GN=CGAS PE=1 SV=2
443,TRUE,Q96KP1	EXOC2_HUMAN,181.35503,10,270.77386,,,310.3774,709.5144,,1411.7439,2806.4604,10,1,,2,2,4,5,8,11,,104066.266,Exocyst complex component 2 OS=Homo sapiens OX=9606 GN=EXOC2 PE=1 SV=1
502,TRUE,Q8IWU2	LMTK2_HUMAN,185.40237,8,,,,,92.92179,190.35628,304.14935,474.9357,8,1,1,,,8,5,5,8,,164900.47,Serine/threonine-protein kinase LMTK2 OS=Homo sapiens OX=9606 GN=LMTK2 PE=1 SV=2
85,TRUE,P13645	K1C10_HUMAN,396.492,36,366240.66,286104.84,70391.836,118353.78,79554.54,93761.125,252644.33,280817.3,31,148,141,77,84,79,75,119,115,Oxidation (M); Carbamidomethylation,58827.086,"Keratin, type I cytoskeletal 10 OS=Homo sapiens OX=9606 GN=KRT10 PE=1 SV=6"
109,TRUE,Q9UHB6	LIMA1_HUMAN,349.24854,32,35644.027,23417.416,15570.415,26927.701,23317.895,25003.45,33330.02,41124.77,32,40,46,35,35,37,35,45,52,Oxidation (M),85225.55,LIM domain and actin-binding protein 1 OS=Homo sapiens OX=9606 GN=LIMA1 PE=1 SV=1
837,TRUE,P62942	FKB1A_HUMAN,125.04466,2,,,556.4675,1815.6371,522.8844,462.71487,1543.1382,1800.4453,2,1,1,3,5,2,1,3,4,Oxidation (M),11950.701,Peptidyl-prolyl cis-trans isomerase FKBP1A OS=Homo sapiens OX=9606 GN=FKBP1A PE=1 SV=2
609,TRUE,Q9UNF0	PACN2_HUMAN,158.14078,6,,,,1147.7002,,1806.2249,1067.5095,811.0139,6,,,1,2,1,3,12,7,,55738.633,Protein kinase C and casein kinase substrate in neurons protein 2 OS=Homo sapiens OX=9606 GN=PACSIN2 PE=1 SV=2
626,TRUE,P11279	LAMP1_HUMAN,213.33852,6,32881.836,26297.11,21738.371,34876.832,3129.891,4198.801,6605.254,6980.3096,6,14,14,13,19,6,7,8,6,,44882.35,Lysosome-associated membrane glycoprotein 1 OS=Homo sapiens OX=9606 GN=LAMP1 PE=1 SV=3
546,TRUE,Q9UK41	VPS28_HUMAN,147.44547,4,,,,137.65909,346.61374,6838,148.52573,874.48486,4,,,,2,1,4,5,5,Oxidation (M); Acetylation (N-term),25425.162,Vacuolar protein sorting-associated protein 28 homolog OS=Homo sapiens OX=9606 GN=VPS28 PE=1 SV=1
705,FALSE,Q9Y5E4	PCDB5_HUMAN,89.43556,2,297.44473,,,176.94254,,,,328.8117,2,1,,,1,,,,2,,86422.71,Protocadherin beta-5 OS=Homo sapiens OX=9606 GN=PCDHB5 PE=2 SV=1
244,TRUE,Q96TA1	NIBA2_HUMAN,241.60023,15,153.62276,,402.2073,833.8529,1174.5156,683.2992,4941.5923,3745.0605,15,4,1,12,10,13,16,20,20,Oxidation (M),84137.86,Protein Niban 2 OS=Homo sapiens OX=9606 GN=NIBAN2 PE=1 SV=3
103,TRUE,Q08174	PCDH1_HUMAN,387.82355,32,214305.28,148725.67,90011.34,146214.52,118071,127927.8,137373.88,172800.31,32,99,92,74,88,71,72,79,87,Oxidation (M),114743.414,Protocadherin-1 OS=Homo sapiens OX=9606 GN=PCDH1 PE=1 SV=2
446,TRUE,Q13443	ADAM9_HUMAN,192.90845,10,10713.637,7630.797,4395.492,10570.819,3479.745,5354.6035,7910.053,9755.453,10,15,11,9,10,8,8,8,12,Carbamidomethylation,90555.98,Disintegrin and metalloproteinase domain-containing protein 9 OS=Homo sapiens OX=9606 GN=ADAM9 PE=1 SV=1
937,TRUE,P01834	IGKC_HUMAN,105.41039,2,,,,,,,,,2,3,2,,,1,2,1,1,,11765.038,Immunoglobulin kappa constant OS=Homo sapiens OX=9606 GN=IGKC PE=1 SV=2
927,TRUE,Q96GZ6	S41A3_HUMAN,76.92282,2,51.831406,,,,,,,,2,1,,1,,,,,1,,54766.688,Solute carrier family 41 member 3 OS=Homo sapiens OX=9606 GN=SLC41A3 PE=1 SV=2
877,TRUE,Q96BD0	SO4A1_HUMAN,73.65714,3,,,,,,,186.34555,,3,1,1,,1,,,2,,,77193.34,Solute carrier organic anion transporter family member 4A1 OS=Homo sapiens OX=9606 GN=SLCO4A1 PE=1 SV=2
976,TRUE,Q15390	MTFR1_HUMAN,82.340996,2,,149.6997,,352.4336,,,,362.74323,2,1,2,1,1,,,1,4,,37000.496,Mitochondrial fission regulator 1 OS=Homo sapiens OX=9606 GN=MTFR1 PE=1 SV=2
362,TRUE,O14936	CSKP_HUMAN,209.65526,12,456.61005,,,,339.95438,465.27057,761.2147,1336.9962,12,6,3,2,8,5,7,5,8,Carbamidomethylation,105122.734,Peripheral plasma membrane protein CASK OS=Homo sapiens OX=9606 GN=CASK PE=1 SV=3
79,TRUE,Q15075	EEA1_HUMAN,352.45917,42,13762.273,7804.252,2362.9111,8377.452,964.56714,1430.1082,2380.6882,4291.9204,42,51,51,26,60,18,16,27,28,Oxidation (M),162465.75,Early endosome antigen 1 OS=Homo sapiens OX=9606 GN=EEA1 PE=1 SV=2
544,TRUE,P04792	HSPB1_HUMAN,192.67517,7,4217.9297,3288.274,2317.162,5984.397,6833.41,7143.6924,11108.102,13318.113,7,10,8,12,11,12,16,12,15,,22782.52,Heat shock protein beta-1 OS=Homo sapiens OX=9606 GN=HSPB1 PE=1 SV=2
569,TRUE,O00264	PGRC1_HUMAN,204.45282,7,7056.4067,4466.0093,1031.5597,5481.739,754.90717,833.3189,534.6971,798.5316,7,10,11,14,16,3,4,3,2,Carbamidomethylation; Oxidation (M),21671.154,Membrane-associated progesterone receptor component 1 OS=Homo sapiens OX=9606 GN=PGRMC1 PE=1 SV=3
578,TRUE,Q9BQL6	FERM1_HUMAN,154.47263,7,177.61794,77.53215,,,181.93248,695.10925,945.9605,1075.7408,7,1,1,,,2,5,8,5,Oxidation (M),77436.78,Fermitin family homolog 1 OS=Homo sapiens OX=9606 GN=FERMT1 PE=1 SV=1
933,TRUE,Q8ND76	CCNY_HUMAN,83.136055,2,719.0576,,,,,,,258.57092,2,1,,,,,,,3,,39336.65,Cyclin-Y OS=Homo sapiens OX=9606 GN=CCNY PE=1 SV=2
300,TRUE,P35237	SPB6_HUMAN,260.03574,13,1027.8667,573.2231,255.73145,1265.3917,4639.156,5452.639,5389.421,6469.941,13,5,4,6,9,8,13,18,13,Oxidation (M),42621.887,Serpin B6 OS=Homo sapiens OX=9606 GN=SERPINB6 PE=1 SV=3
24,TRUE,P35222	CTNB1_HUMAN,450.12512,45,470985.97,339177.22,199355.38,326066.12,280223.5,300351.66,360841.03,410027.44,38,247,233,183,221,198,210,216,225,Acetylation (N-term); Oxidation (M); Carbamidomethylation,85496.58,Catenin beta-1 OS=Homo sapiens OX=9606 GN=CTNNB1 PE=1 SV=1
312,TRUE,O94973	AP2A2_HUMAN,243.59541,14,1939.828,407.93027,461.38702,429.71338,,,,,8,11,16,10,11,,2,3,3,Oxidation (M); Carbamidomethylation,103960.414,AP-2 complex subunit alpha-2 OS=Homo sapiens OX=9606 GN=AP2A2 PE=1 SV=2
36,FALSE,Q58FF7	H90B3_HUMAN,315.6971,23,41260.957,28393.035,50393.215,79311.74,117080.59,117554,181372.31,202597.4,11,56,45,72,90,91,87,97,111,Oxidation (M); Acetylation (N-term); Carbamidomethylation,68324.836,Putative heat shock protein HSP 90-beta-3 OS=Homo sapiens OX=9606 GN=HSP90AB3P PE=5 SV=1
373,TRUE,P21281	VATB2_HUMAN,211.80598,11,4671.8296,2915.0344,1638.0941,3180.2717,1727.9075,1580.2491,3526.5986,4871.6753,11,12,10,8,10,12,4,14,8,Oxidation (M); Carbamidomethylation,56500.727,"V-type proton ATPase subunit B, brain isoform OS=Homo sapiens OX=9606 GN=ATP6V1B2 PE=1 SV=3"
731,TRUE,P53680	AP2S1_HUMAN,138.54996,4,,,,,,,,,4,5,,,1,1,,,1,Oxidation (M),17017.697,AP-2 complex subunit sigma OS=Homo sapiens OX=9606 GN=AP2S1 PE=1 SV=2
643,TRUE,P43003	EAA1_HUMAN,136.5328,4,1752.0365,818.4942,416.82355,792.63904,248.93767,311.65387,586.099,1071.415,4,6,7,3,5,3,2,4,4,Oxidation (M),59572.31,Excitatory amino acid transporter 1 OS=Homo sapiens OX=9606 GN=SLC1A3 PE=1 SV=1
29,TRUE,P35221	CTNA1_HUMAN,452.1444,53,436209.88,348423.4,208859.98,336513.94,234534.7,268968.8,215706.03,243480.33,41,197,193,159,207,161,166,150,159,Carbamidomethylation; Oxidation (M); Acetylation (N-term),100071.266,Catenin alpha-1 OS=Homo sapiens OX=9606 GN=CTNNA1 PE=1 SV=1
779,TRUE,Q16563	SYPL1_HUMAN,121.084076,4,4511.371,1865.2053,438.2367,6167.6646,1082.2131,1407.8284,1872.6212,2910.4548,4,8,4,5,8,3,3,2,3,Carbamidomethylation,28565.277,Synaptophysin-like protein 1 OS=Homo sapiens OX=9606 GN=SYPL1 PE=1 SV=1
309,TRUE,Q92673	SORL_HUMAN,223.26115,13,131.02185,,,,901.4385,485.4399,6185.8975,1999.7955,13,1,1,,,9,10,12,15,Oxidation (M),248426.36,Sortilin-related receptor OS=Homo sapiens OX=9606 GN=SORL1 PE=1 SV=2
426,TRUE,Q5VY43	PEAR1_HUMAN,233.51013,10,14053.122,7635.0327,3041.5315,8346.381,3568.4526,4995.66,7084.707,7297.774,10,18,17,16,22,12,12,14,14,Carbamidomethylation,110666.195,Platelet endothelial aggregation receptor 1 OS=Homo sapiens OX=9606 GN=PEAR1 PE=1 SV=1
406,FALSE,P27361	MK03_HUMAN,136.1343,3,,,,516.9412,1121.6982,1399.4398,2021.0062,2123.183,3,,,,1,3,4,3,6,Oxidation (M); Carbamidomethylation,43135.57,Mitogen-activated protein kinase 3 OS=Homo sapiens OX=9606 GN=MAPK3 PE=1 SV=4
929,TRUE,Q03167	TGBR3_HUMAN,98.19084,2,,,,,,,,,2,,1,,1,2,1,1,3,,93499.36,Transforming growth factor beta receptor type 3 OS=Homo sapiens OX=9606 GN=TGFBR3 PE=1 SV=3
356,TRUE,Q8TCT9	HM13_HUMAN,245.73756,11,40005.043,27233.799,24841.748,40362.863,18717.236,18163.578,21499.14,33053.543,11,33,24,26,23,18,18,17,22,Oxidation (M),41488.336,Minor histocompatibility antigen H13 OS=Homo sapiens OX=9606 GN=HM13 PE=1 SV=1
799,TRUE,Q13671	RIN1_HUMAN,130.60432,3,,,,78.56908,544.92584,609.2301,948.5554,1538.1707,3,1,1,,2,3,2,5,4,,84098.9,Ras and Rab interactor 1 OS=Homo sapiens OX=9606 GN=RIN1 PE=1 SV=4
798,TRUE,Q96MU7	YTDC1_HUMAN,80.07883,3,587.1899,381.13055,290.15802,1013.61633,3059.454,617.39594,837.27185,3058.9722,3,1,1,3,3,2,2,1,2,,84700.33,YTH domain-containing protein 1 OS=Homo sapiens OX=9606 GN=YTHDC1 PE=1 SV=3
61,TRUE,P13647	K2C5_HUMAN,333.71848,43,122903.75,90305.08,4932.9326,12764.377,10807.147,15478.359,26955.352,26404.113,28,132,115,51,75,58,62,86,79,Oxidation (M); Carbamidomethylation,62378.34,"Keratin, type II cytoskeletal 5 OS=Homo sapiens OX=9606 GN=KRT5 PE=1 SV=3"
108,TRUE,Q8IWT6	LRC8A_HUMAN,347.62387,32,59085.7,42700.098,26054.336,51479.156,33757.8,42682.152,53550.6,68860.58,30,59,65,45,67,54,64,58,56,Carbamidomethylation; Oxidation (M),94198.734,Volume-regulated anion channel subunit LRRC8A OS=Homo sapiens OX=9606 GN=LRRC8A PE=1 SV=1
376,TRUE,O75122	CLAP2_HUMAN,240.07004,12,,,357.20795,501.10162,441.26556,1028.201,2599.0535,3691.4277,12,1,1,3,5,9,9,19,14,,141063.66,CLIP-associating protein 2 OS=Homo sapiens OX=9606 GN=CLASP2 PE=1 SV=3
805,TRUE,Q14108	SCRB2_HUMAN,105.95971,3,700.7766,,,321.88123,,,347.75232,416.55557,3,3,1,4,4,,,4,2,,54290.156,Lysosome membrane protein 2 OS=Homo sapiens OX=9606 GN=SCARB2 PE=1 SV=2
956,TRUE,O60779	S19A2_HUMAN,87.36767,2,350.45673,,,187.96886,,,79.44397,528.8889,2,2,2,,3,,2,1,5,,55400.074,Thiamine transporter 1 OS=Homo sapiens OX=9606 GN=SLC19A2 PE=1 SV=2
988,TRUE,P26012	ITB8_HUMAN,90.08644,2,186.10455,,,,,,,,2,1,1,,2,2,,1,1,,85631.86,Integrin beta-8 OS=Homo sapiens OX=9606 GN=ITGB8 PE=1 SV=1
3,FALSE,A0AVI2	FR1L5_HUMAN,111.03475,2,4900.938,3558.6333,2303.3977,4461.592,1283.2694,2197.958,3593.5166,3928.1165,2,4,6,5,6,4,2,5,4,,237934.83,Fer-1-like protein 5 OS=Homo sapiens OX=9606 GN=FER1L5 PE=2 SV=3
675,TRUE,O75911	DHRS3_HUMAN,148.32246,4,1894.1824,1184.1431,66.25684,1433.8262,247.44402,398.43982,793.9525,1191.6812,4,8,8,2,6,2,1,2,6,Oxidation (M),33548.395,Short-chain dehydrogenase/reductase 3 OS=Homo sapiens OX=9606 GN=DHRS3 PE=1 SV=2
172,TRUE,P40763	STAT3_HUMAN,319.92465,20,,,197.23114,1652.4718,3104.3013,3372.4062,7704.302,10264.671,20,1,1,6,9,24,26,34,30,Oxidation (M),88067.79,Signal transducer and activator of transcription 3 OS=Homo sapiens OX=9606 GN=STAT3 PE=1 SV=2
749,TRUE,Q9NZM3	ITSN2_HUMAN,103.90735,4,,,,,,,376.29794,677.87866,4,,,1,,1,,3,2,,193461.45,Intersectin-2 OS=Homo sapiens OX=9606 GN=ITSN2 PE=1 SV=3
255,TRUE,P42356	PI4KA_HUMAN,213.2718,17,,,,751.45795,1550.4719,1598.8689,1241.9548,12387.712,17,,,,2,6,7,8,12,,236830.45,Phosphatidylinositol 4-kinase alpha OS=Homo sapiens OX=9606 GN=PI4KA PE=1 SV=4
828,TRUE,Q96RF0	SNX18_HUMAN,128.95665,3,302.29422,97.9032,,183.77402,,658.6333,766.4592,442.8423,3,2,2,,2,1,5,3,3,,68894.43,Sorting nexin-18 OS=Homo sapiens OX=9606 GN=SNX18 PE=1 SV=2
364,TRUE,Q14254	FLOT2_HUMAN,199.69313,12,6988.8696,1117.3806,1186.6388,1841.09,231.65575,166.02301,267.6835,1571.5078,12,17,9,11,15,3,1,3,3,Oxidation (M),47064.16,Flotillin-2 OS=Homo sapiens OX=9606 GN=FLOT2 PE=1 SV=2
270,TRUE,O95292	VAPB_HUMAN,243.18541,12,27540.5,20522.975,16927.76,24567.395,4526.1157,6290.006,9271.688,11595.965,11,37,34,29,34,13,17,21,22,Carbamidomethylation; Oxidation (M),27228.387,Vesicle-associated membrane protein-associated protein B/C OS=Homo sapiens OX=9606 GN=VAPB PE=1 SV=3
687,TRUE,P13747	HLAE_HUMAN,169.00854,5,496.84485,111.973434,125.9731,,,,122.89222,169.20972,3,5,3,3,5,2,2,6,4,,40057.566,"HLA class I histocompatibility antigen, alpha chain E OS=Homo sapiens OX=9606 GN=HLA-E PE=1 SV=4"
1007,TRUE,Q5D862	FILA2_HUMAN,91.342606,2,482.30725,193.32355,,,,,,168.30605,2,3,3,1,1,,2,2,3,,248072.58,Filaggrin-2 OS=Homo sapiens OX=9606 GN=FLG2 PE=1 SV=1
237,TRUE,O95782	AP2A1_HUMAN,268.0478,17,2942.4373,697.8465,297.64215,2884.0923,192.94012,,430.80222,959.9741,11,21,16,10,20,2,5,6,10,Oxidation (M); Carbamidomethylation,107545.88,AP-2 complex subunit alpha-1 OS=Homo sapiens OX=9606 GN=AP2A1 PE=1 SV=3
672,TRUE,O43493	TGON2_HUMAN,190.26126,5,1595.9028,1290.844,428.362,1598.8286,,,,,5,9,5,4,5,,1,,1,,45879.57,Trans-Golgi network integral membrane protein 2 OS=Homo sapiens OX=9606 GN=TGOLN2 PE=1 SV=4
478,TRUE,P36873	PP1G_HUMAN,248.04057,9,,,,132.97986,,,205.401,162.93425,2,6,7,7,10,8,6,7,13,Carbamidomethylation,36983.785,Serine/threonine-protein phosphatase PP1-gamma catalytic subunit OS=Homo sapiens OX=9606 GN=PPP1CC PE=1 SV=1
713,TRUE,P07204	TRBM_HUMAN,155.29846,4,6723.9863,8094.949,4928.757,8988.62,6961.463,7364.361,4525.405,1809.5481,4,7,9,9,10,9,7,8,8,,60329.375,Thrombomodulin OS=Homo sapiens OX=9606 GN=THBD PE=1 SV=2
201,FALSE,Q969R2	OSBP2_HUMAN,88.19971,2,,,,,,,864.12384,702.1941,2,,,,,,,2,1,,101265.805,Oxysterol-binding protein 2 OS=Homo sapiens OX=9606 GN=OSBP2 PE=1 SV=2
811,TRUE,Q08722	CD47_HUMAN,99.77771,3,5601.044,3238.3828,3324.7266,4905.4375,2432.919,1180.5775,3559.0498,4003.916,3,6,4,6,3,4,4,3,3,,35213.637,Leukocyte surface antigen CD47 OS=Homo sapiens OX=9606 GN=CD47 PE=1 SV=1
770,TRUE,P51809	VAMP7_HUMAN,104.78935,3,275.57794,109.35982,136.05637,425.4316,,,,,3,4,3,2,4,,,1,,Oxidation (M),24935.057,Vesicle-associated membrane protein 7 OS=Homo sapiens OX=9606 GN=VAMP7 PE=1 SV=3
247,TRUE,Q6P1M0	S27A4_HUMAN,225.81174,15,3313.79,3401.414,751.80707,3603.3528,1130.2155,921.1748,2449.5408,1821.11,15,17,20,10,13,8,5,16,9,Oxidation (M); Carbamidomethylation,72064.24,Long-chain fatty acid transport protein 4 OS=Homo sapiens OX=9606 GN=SLC27A4 PE=1 SV=1
154,FALSE,Q9UQ16	DYN3_HUMAN,172.26848,7,,197.47107,347.14163,1951.113,757.57697,1152.0492,8637.392,9768.6,7,1,2,4,4,4,4,7,10,Oxidation (M),97746.11,Dynamin-3 OS=Homo sapiens OX=9606 GN=DNM3 PE=1 SV=4
659,TRUE,Q9Y6W5	WASF2_HUMAN,193.81485,5,,,,71.926216,98.397,211.34357,923.0674,1307.7877,5,,1,,1,3,4,8,4,,54284.035,Wiskott-Aldrich syndrome protein family member 2 OS=Homo sapiens OX=9606 GN=WASF2 PE=1 SV=3
653,TRUE,Q9HCM4	E41L5_HUMAN,130.7622,5,,,,,,,207.55194,197.89058,5,,1,2,,1,3,4,5,Oxidation (M),81856.19,Band 4.1-like protein 5 OS=Homo sapiens OX=9606 GN=EPB41L5 PE=1 SV=3
585,TRUE,Q15599	NHRF2_HUMAN,196.00934,7,1183.3168,783.64215,521.7555,1662.9033,847.6073,902.5137,791.78906,1475.9735,7,8,7,6,4,8,7,5,7,,37413.76,Na(+)/H(+) exchange regulatory cofactor NHE-RF2 OS=Homo sapiens OX=9606 GN=SLC9A3R2 PE=1 SV=2
454,TRUE,Q9NV96	CC50A_HUMAN,204.05038,9,2717.8745,2406.6567,1093.5704,2152.361,1406.3533,1501.383,2266.8462,3380.785,9,14,10,10,14,8,11,10,12,Carbamidomethylation,40683.66,Cell cycle control protein 50A OS=Homo sapiens OX=9606 GN=TMEM30A PE=1 SV=1
482,TRUE,Q9Y625	GPC6_HUMAN,195.16237,7,536.44965,424.37433,,432.50674,,,222.20178,1628.1599,4,7,4,5,6,12,7,10,9,Oxidation (M),62735.52,Glypican-6 OS=Homo sapiens OX=9606 GN=GPC6 PE=1 SV=1
646,TRUE,P0CG48	UBC_HUMAN,188.32823,5,195193.3,145332.75,107518.73,163726.83,154516.27,159804.88,187127.61,214916.14,5,34,33,36,37,38,34,39,36,,77038.61,Polyubiquitin-C OS=Homo sapiens OX=9606 GN=UBC PE=1 SV=3
679,TRUE,Q13464	ROCK1_HUMAN,112.882195,5,,,,,,,,,3,,,,,,,2,3,,158174.67,Rho-associated protein kinase 1 OS=Homo sapiens OX=9606 GN=ROCK1 PE=1 SV=1
556,TRUE,Q9UJU6	DBNL_HUMAN,203.42372,6,55.66153,,,455.7492,966.3558,1132.9924,1705.9016,2145.2197,6,3,,4,7,6,6,7,9,Oxidation (M),48207.27,Drebrin-like protein OS=Homo sapiens OX=9606 GN=DBNL PE=1 SV=1
78,TRUE,P33527	MRP1_HUMAN,344.35306,35,94946.12,8200.273,5004.848,12408.113,1690.0233,3181.4844,5492.2324,62070.426,35,52,37,29,48,25,22,22,31,Oxidation (M); Carbamidomethylation,171591.17,Multidrug resistance-associated protein 1 OS=Homo sapiens OX=9606 GN=ABCC1 PE=1 SV=3
725,TRUE,Q8N3E9	PLCD3_HUMAN,104.99681,4,30940.773,128.80348,,114.38761,,,207.68121,29446.586,4,1,1,,1,,1,2,3,,89258.38,"1-phosphatidylinositol 4,5-bisphosphate phosphodiesterase delta-3 OS=Homo sapiens OX=9606 GN=PLCD3 PE=1 SV=3"
280,TRUE,P62491	RB11A_HUMAN,224.86931,12,61198.914,50944.336,40508.746,57215.05,12098.416,10898.361,15529.82,18274.9,11,31,29,29,33,10,6,13,11,Acetylation (N-term); Oxidation (M),24393.518,Ras-related protein Rab-11A OS=Homo sapiens OX=9606 GN=RAB11A PE=1 SV=3
815,TRUE,Q6P1M3	L2GL2_HUMAN,118.69192,3,,,,,183.08675,137.89261,141.87476,849.38153,3,,,,,2,2,4,3,,113447.945,LLGL scribble cell polarity complex component 2 OS=Homo sapiens OX=9606 GN=LLGL2 PE=1 SV=2
207,TRUE,P35232	PHB_HUMAN,320.4196,20,143496.38,124363.91,91873,154007.69,17537.574,16985.87,24603.758,25544.617,20,65,51,54,63,25,27,31,32,Carbamidomethylation,29804.098,Prohibitin OS=Homo sapiens OX=9606 GN=PHB PE=1 SV=1
391,TRUE,Q14141	SEPT6_HUMAN,214.09926,10,44.531433,,,132.99474,882.1825,461.18835,1123.0598,2713.8787,9,3,2,7,9,10,12,11,11,Oxidation (M),49716.645,Septin-6 OS=Homo sapiens OX=9606 GN=SEPTIN6 PE=1 SV=4
77,TRUE,Q99959	PKP2_HUMAN,361.76767,34,47258.14,32799.1,13328.932,28004.775,24950.31,27542.434,37587.004,40198.348,34,66,61,43,56,49,57,63,65,Oxidation (M); Carbamidomethylation,97414.85,Plakophilin-2 OS=Homo sapiens OX=9606 GN=PKP2 PE=1 SV=2
526,TRUE,P10620	MGST1_HUMAN,163.10332,5,6870.383,4657.8784,3402.9827,7123.564,965.48834,1304.1868,1449.8796,3218.795,5,5,5,8,11,3,2,5,3,Oxidation (M); Carbamidomethylation,17598.658,Microsomal glutathione S-transferase 1 OS=Homo sapiens OX=9606 GN=MGST1 PE=1 SV=1
243,TRUE,Q8NI35	INADL_HUMAN,221.38127,18,924.72375,163.57164,,231.88647,348.6613,1128.6326,2062.1284,1409.492,18,4,3,,5,7,15,12,13,Oxidation (M),196368.1,InaD-like protein OS=Homo sapiens OX=9606 GN=PATJ PE=1 SV=3
599,TRUE,Q9BZQ8	NIBA1_HUMAN,183.94257,6,123.45424,,,,489.17404,847.10486,649.27686,1133.3564,6,1,,,2,6,4,2,4,,103134.68,Protein Niban 1 OS=Homo sapiens OX=9606 GN=NIBAN1 PE=1 SV=1
90,TRUE,Q9UPN3	MACF1_HUMAN,334.2867,36,639.8577,,,434.16647,655.871,1204.291,1874.8198,1813.5913,32,13,6,4,17,23,24,22,34,Oxidation (M),838307.6,"Microtubule-actin cross-linking factor 1, isoforms 1/2/3/5 OS=Homo sapiens OX=9606 GN=MACF1 PE=1 SV=4"
756,TRUE,P07858	CATB_HUMAN,169.80461,4,,,,,,,64.14779,391.96332,4,1,,,,3,4,2,4,Oxidation (M),37821.58,Cathepsin B OS=Homo sapiens OX=9606 GN=CTSB PE=1 SV=3
380,TRUE,O14786	NRP1_HUMAN,256.62476,12,2876.197,1646.3414,1286.4034,2595.4163,2364.0244,3057.046,3526.7197,5335.942,12,18,9,7,9,7,6,8,13,,103134.336,Neuropilin-1 OS=Homo sapiens OX=9606 GN=NRP1 PE=1 SV=3
472,TRUE,Q86SQ4	AGRG6_HUMAN,213.61336,9,3153.9956,1882.2781,334.60352,2145.9863,1320.3052,1404.5563,1681.63,1884.2351,9,9,7,6,9,6,10,8,9,,136694.61,Adhesion G-protein coupled receptor G6 OS=Homo sapiens OX=9606 GN=ADGRG6 PE=1 SV=3
422,TRUE,P61020	RAB5B_HUMAN,224.0778,8,3032.435,1761.297,672.6201,1851.1914,,,549.2637,847.64526,5,23,22,20,31,15,9,10,11,Oxidation (M),23706.803,Ras-related protein Rab-5B OS=Homo sapiens OX=9606 GN=RAB5B PE=1 SV=1
762,TRUE,Q13616	CUL1_HUMAN,130.70251,4,,,,,,169.24724,,593.2531,4,,,,,1,1,3,4,,89678.52,Cullin-1 OS=Homo sapiens OX=9606 GN=CUL1 PE=1 SV=2
704,FALSE,Q309B1	TR16L_HUMAN,80.35119,3,,,,,,,278.9764,255.33081,3,,,,,,1,2,3,,40305.766,Tripartite motif-containing protein 16-like protein OS=Homo sapiens OX=9606 GN=TRIM16L PE=2 SV=3
13,TRUE,Q00610	CLH1_HUMAN,491.0715,77,201620.05,138043.77,85929.32,157500.6,101406.45,119910.734,221425,245641.08,77,174,164,131,169,132,135,186,183,Oxidation (M); Carbamidomethylation,191614.62,Clathrin heavy chain 1 OS=Homo sapiens OX=9606 GN=CLTC PE=1 SV=5
545,TRUE,Q13641	TPBG_HUMAN,212.63974,6,5228.897,4499.71,2121.9697,5137.4893,3732.1313,6385.186,7116.579,7238.1357,6,15,16,10,18,13,15,9,12,Oxidation (M),46031.86,Trophoblast glycoprotein OS=Homo sapiens OX=9606 GN=TPBG PE=1 SV=1
196,FALSE,Q9UHX3	AGRE2_HUMAN,83.28574,2,,,,,,,,,2,1,1,1,1,1,,1,1,Carbamidomethylation; Oxidation (M),90471.87,Adhesion G protein-coupled receptor E2 OS=Homo sapiens OX=9606 GN=ADGRE2 PE=1 SV=2
307,TRUE,P46939	UTRO_HUMAN,199.01251,14,437.89044,,,253.72922,219.48021,523.3055,364.72864,1622.6147,14,7,2,,3,6,4,8,11,Oxidation (M),394466.2,Utrophin OS=Homo sapiens OX=9606 GN=UTRN PE=1 SV=2
488,TRUE,Q9NPR2	SEM4B_HUMAN,163.67798,8,1758.2347,866.70825,,1473.7378,145.5275,476.08453,1577.5741,1475.5863,8,12,7,5,11,3,3,6,3,Oxidation (M),92765.95,Semaphorin-4B OS=Homo sapiens OX=9606 GN=SEMA4B PE=1 SV=4
173,TRUE,P08237	PFKAM_HUMAN,296.30215,18,1131.8558,734.4668,479.64624,1591.5209,6786.792,10208.561,13032.814,14683.988,18,9,4,6,15,25,31,34,30,Acetylation (N-term); Oxidation (M),85182.516,"ATP-dependent 6-phosphofructokinase, muscle type OS=Homo sapiens OX=9606 GN=PFKM PE=1 SV=2"
973,TRUE,Q96A54	PAQR1_HUMAN,73.43652,2,242.89743,221.57988,121.45176,,,,,1339.0659,2,3,1,2,,,,,1,Carbamidomethylation,42615.668,Adiponectin receptor protein 1 OS=Homo sapiens OX=9606 GN=ADIPOR1 PE=1 SV=1
965,TRUE,O75581	LRP6_HUMAN,65.850494,2,,,,,,,,,2,1,,,,,1,,,,180429.34,Low-density lipoprotein receptor-related protein 6 OS=Homo sapiens OX=9606 GN=LRP6 PE=1 SV=2
43,TRUE,P68104	EF1A1_HUMAN,430.5625,38,329869.38,264619.6,351334.5,470745.28,1127957.2,1217097.5,1283033.2,1466626,38,113,97,126,140,224,266,298,322,Carbamidomethylation; Oxidation (M),50140.86,Elongation factor 1-alpha 1 OS=Homo sapiens OX=9606 GN=EEF1A1 PE=1 SV=1
182,TRUE,P78310	CXAR_HUMAN,259.09097,13,19031.102,12743.559,7777.1533,13973.467,9280.237,13672.77,21023.773,25995.875,13,23,23,21,22,18,17,32,24,Oxidation (M),40029.89,Coxsackievirus and adenovirus receptor OS=Homo sapiens OX=9606 GN=CXADR PE=1 SV=1
75,TRUE,Q9BSJ8	ESYT1_HUMAN,403.0339,40,63801.395,40693.953,24727.393,42013.24,23739.28,27487.39,34907.742,46891.156,40,65,67,55,67,46,42,61,52,Carbamidomethylation; Oxidation (M),122856.445,Extended synaptotagmin-1 OS=Homo sapiens OX=9606 GN=ESYT1 PE=1 SV=1
179,TRUE,Q99623	PHB2_HUMAN,317.8631,21,172246.14,138002.86,96357.72,150909.44,39988.29,41088.04,57322.617,68811.8,21,64,60,59,66,37,32,39,40,Oxidation (M),33296.38,Prohibitin-2 OS=Homo sapiens OX=9606 GN=PHB2 PE=1 SV=2
433,TRUE,P17706	PTN2_HUMAN,159.1793,7,775.6851,362.30008,,668.63696,,554.35583,676.6452,1447.0836,7,6,4,1,4,1,3,2,5,Oxidation (M),48473.266,Tyrosine-protein phosphatase non-receptor type 2 OS=Homo sapiens OX=9606 GN=PTPN2 PE=1 SV=2
232,TRUE,P04899	GNAI2_HUMAN,300.812,15,7118.4927,5240.909,3598.7556,7012.9385,4247.831,3455.422,8627.776,10462.491,8,33,31,25,33,19,24,25,27,Oxidation (M); Carbamidomethylation,40450.902,Guanine nucleotide-binding protein G(i) subunit alpha-2 OS=Homo sapiens OX=9606 GN=GNAI2 PE=1 SV=3
149,TRUE,Q5T9A4	ATD3B_HUMAN,255.27396,20,41178.54,30652.28,18889.424,33669.36,12371.986,12908.699,15862.859,22322.998,20,32,27,17,26,10,13,22,20,Oxidation (M),72572.92,ATPase family AAA domain-containing protein 3B OS=Homo sapiens OX=9606 GN=ATAD3B PE=1 SV=1
140,TRUE,P23396	RS3_HUMAN,344.28317,24,254686.75,212875.61,131426.5,210573.81,316234.8,295994.94,331812.1,423038.7,24,76,82,76,83,88,95,112,122,Carbamidomethylation; Oxidation (M),26688.31,40S ribosomal protein S3 OS=Homo sapiens OX=9606 GN=RPS3 PE=1 SV=2
461,FALSE,Q6NZ63	STEAL_HUMAN,112.19125,3,3064.9307,2114.3887,734.3115,2055.4976,1233.5737,991.3777,2300.3267,2208.5938,3,5,3,3,3,2,2,4,2,,28814.695,STEAP family member 1B OS=Homo sapiens OX=9606 GN=STEAP1B PE=1 SV=1
995,TRUE,Q9BTW9	TBCD_HUMAN,81.96024,2,,,,,213.95256,,190.04666,,2,,,,,4,2,3,3,,132599.94,Tubulin-specific chaperone D OS=Homo sapiens OX=9606 GN=TBCD PE=1 SV=2
455,TRUE,Q460N5	PAR14_HUMAN,189.51175,8,,,,,,,63.39431,107.11618,7,,1,1,1,6,5,5,7,Oxidation (M),202800.2,Protein mono-ADP-ribosyltransferase PARP14 OS=Homo sapiens OX=9606 GN=PARP14 PE=1 SV=3
212,TRUE,O14974	MYPT1_HUMAN,246.49751,17,1074.3226,318.0932,978.1606,2246.2507,2182.1138,3525.8333,6251.3125,7543.1846,17,3,3,6,9,9,10,23,19,Oxidation (M),115280.71,Protein phosphatase 1 regulatory subunit 12A OS=Homo sapiens OX=9606 GN=PPP1R12A PE=1 SV=1
734,TRUE,Q5T2T1	MPP7_HUMAN,138.63478,4,,,,100.78621,,83.88177,,1140.349,4,3,2,,6,2,3,2,6,,65523.74,MAGUK p55 subfamily member 7 OS=Homo sapiens OX=9606 GN=MPP7 PE=1 SV=1
741,TRUE,Q8IWK6	AGRA3_HUMAN,132.57451,4,,,,,,,,,4,3,1,,2,1,,2,2,,146150.77,Adhesion G protein-coupled receptor A3 OS=Homo sapiens OX=9606 GN=ADGRA3 PE=1 SV=2
705,FALSE,Q9Y5F1	PCDBC_HUMAN,89.42716,2,297.44473,,,176.94254,,,,520.02356,2,1,1,,1,,,,2,,86769.9,Protocadherin beta-12 OS=Homo sapiens OX=9606 GN=PCDHB12 PE=1 SV=1
253,TRUE,Q9H0H5	RGAP1_HUMAN,259.84137,15,5818.5825,1541.4921,941.85767,2698.0818,1826.5995,4177.454,8738.11,10506.038,15,13,7,10,11,12,18,15,18,Oxidation (M),71026.53,Rac GTPase-activating protein 1 OS=Homo sapiens OX=9606 GN=RACGAP1 PE=1 SV=1
72,TRUE,P14625	ENPL_HUMAN,384.20312,38,26142.291,17062.455,26942.252,47942.926,55880.637,60633.87,69886.664,78202.71,37,50,38,58,64,73,83,79,77,Oxidation (M); Carbamidomethylation,92468.86,Endoplasmin OS=Homo sapiens OX=9606 GN=HSP90B1 PE=1 SV=1
222,TRUE,Q16181	SEPT7_HUMAN,282.6663,17,1634.2336,1307.3511,2099.836,5486.6147,3893.9998,6770.28,5743.685,8476.748,16,13,10,14,16,17,19,26,24,Carbamidomethylation; Oxidation (M),50679.938,Septin-7 OS=Homo sapiens OX=9606 GN=SEPTIN7 PE=1 SV=2
235,TRUE,P63092	GNAS2_HUMAN,253.42369,15,14900.128,10906.795,7609.993,14338.168,5887.6255,7195.5444,9669.736,13165.296,13,33,32,26,34,20,26,25,33,Oxidation (M),45664.58,Guanine nucleotide-binding protein G(s) subunit alpha isoforms short OS=Homo sapiens OX=9606 GN=GNAS PE=1 SV=1
14,TRUE,P07814	SYEP_HUMAN,450.34772,75,62882.293,626903.1,26653.242,54909.992,739690.1,148499.03,171760.45,283613.4,75,92,76,74,105,146,144,165,151,Oxidation (M); Carbamidomethylation,170590.89,Bifunctional glutamate/proline--tRNA ligase OS=Homo sapiens OX=9606 GN=EPRS1 PE=1 SV=5
250,TRUE,Q13131	AAPK1_HUMAN,237.77083,13,1479.5342,741.00494,2596.1787,4162.3657,6753.946,8987.767,10809.264,13374.361,13,7,7,9,10,11,14,17,25,Oxidation (M),64009.223,5'-AMP-activated protein kinase catalytic subunit alpha-1 OS=Homo sapiens OX=9606 GN=PRKAA1 PE=1 SV=4
533,TRUE,O95297	MPZL1_HUMAN,220.28693,8,24647.227,13652.232,8324.481,19677.105,14085.938,21911.594,23660.18,26221.219,8,18,13,11,17,16,17,20,17,Carbamidomethylation,29082.18,Myelin protein zero-like protein 1 OS=Homo sapiens OX=9606 GN=MPZL1 PE=1 SV=1
175,TRUE,P58107	EPIPL_HUMAN,321.49136,21,33631.617,24518.977,12024.528,20634.053,19811.51,21050.695,25507.035,29816.844,12,55,43,36,39,43,46,58,47,Oxidation (M),555658.1,Epiplakin OS=Homo sapiens OX=9606 GN=EPPK1 PE=1 SV=3
68,TRUE,Q9UDY2	ZO2_HUMAN,338.1153,40,22590.785,13769.643,8868.723,17537.324,17206.965,22989.41,27707.096,34421.066,39,52,44,37,52,49,59,58,58,Oxidation (M),133958.03,Tight junction protein ZO-2 OS=Homo sapiens OX=9606 GN=TJP2 PE=1 SV=2
909,TRUE,P00390	GSHR_HUMAN,64.2583,2,,,,,,,183.21332,,2,,,,,1,,1,,,56257.008,"Glutathione reductase, mitochondrial OS=Homo sapiens OX=9606 GN=GSR PE=1 SV=2"
831,TRUE,P16298	PP2BB_HUMAN,88.35954,3,232.07475,,,229.46194,,233.79854,568.1012,555.79865,2,1,1,3,2,2,1,2,3,Oxidation (M),59024.285,Serine/threonine-protein phosphatase 2B catalytic subunit beta isoform OS=Homo sapiens OX=9606 GN=PPP3CB PE=1 SV=2
52,TRUE,P00533	EGFR_HUMAN,421.71683,43,399936.1,293961.3,199312.19,323497.34,300367.9,321627.34,407487.47,492999.34,40,133,131,110,133,119,120,141,154,Carbamidomethylation; Oxidation (M),134277.39,Epidermal growth factor receptor OS=Homo sapiens OX=9606 GN=EGFR PE=1 SV=2
419,TRUE,Q8N6H7	ARFG2_HUMAN,218.84018,10,,,1100.9944,2245.607,644.0693,825.71027,4602.443,8019.93,10,,,5,8,3,2,7,18,,56720.36,ADP-ribosylation factor GTPase-activating protein 2 OS=Homo sapiens OX=9606 GN=ARFGAP2 PE=1 SV=1
2,TRUE,Q09666	AHNK_HUMAN,568.81793,223,353530.16,244723.92,184076.27,360920.75,284935,284586.78,352026.5,464288,223,432,404,417,447,420,441,463,456,Oxidation (M); Carbamidomethylation,629101.25,Neuroblast differentiation-associated protein AHNAK OS=Homo sapiens OX=9606 GN=AHNAK PE=1 SV=2
261,TRUE,Q8IWA5	CTL2_HUMAN,228.45032,14,15606.531,8897.394,5712.9224,13415.263,7296.4956,8219.204,10741.318,14257.197,14,23,14,15,23,16,16,18,20,Carbamidomethylation; Acetylation (N-term); Oxidation (M),80123.63,Choline transporter-like protein 2 OS=Homo sapiens OX=9606 GN=SLC44A2 PE=1 SV=3
824,TRUE,Q9UQ49	NEUR3_HUMAN,104.44395,3,,,,83.97758,,,173.84933,,3,,,,1,2,,2,,,48251.945,Sialidase-3 OS=Homo sapiens OX=9606 GN=NEU3 PE=1 SV=1
900,TRUE,P15407	FOSL1_HUMAN,107.59006,2,2728.634,1696.0476,1410.3412,3403.645,2242.6453,2295.6267,3673.3193,5058.3594,2,5,3,2,3,5,6,5,5,,29413.205,Fos-related antigen 1 OS=Homo sapiens OX=9606 GN=FOSL1 PE=1 SV=1
819,TRUE,P52799	EFNB2_HUMAN,128.34474,3,71.72517,,,156.57446,,,165.2147,420.64352,3,2,2,1,3,,1,5,3,,36923.19,Ephrin-B2 OS=Homo sapiens OX=9606 GN=EFNB2 PE=1 SV=1
901,TRUE,Q8TF72	SHRM3_HUMAN,55.051773,2,9373.59,7025.421,3496.7615,5235.736,4679.796,6198.465,6520.709,8212.081,2,4,3,2,3,3,3,2,3,,216857.47,Protein Shroom3 OS=Homo sapiens OX=9606 GN=SHROOM3 PE=1 SV=2
311,TRUE,Q9H0B6	KLC2_HUMAN,254.17569,14,125.44801,,192.04663,316.3104,2351.255,2384.9663,3698.1326,4620.532,14,2,2,1,3,11,10,11,14,,68934.6,Kinesin light chain 2 OS=Homo sapiens OX=9606 GN=KLC2 PE=1 SV=1
366,TRUE,Q9NQS3	NECT3_HUMAN,234.9147,11,9084.076,8071.321,4752.3564,10414.284,3470.2764,4184.1743,8610.949,11542.695,11,18,10,12,24,13,11,13,16,Oxidation (M),61002.484,Nectin-3 OS=Homo sapiens OX=9606 GN=NECTIN3 PE=1 SV=1
594,TRUE,Q8NHV4	NEDD1_HUMAN,206.89839,7,131.17696,,,219.22662,177.3146,177.68924,568.7202,1107.5776,7,1,,1,4,4,4,7,10,,71966.086,Protein NEDD1 OS=Homo sapiens OX=9606 GN=NEDD1 PE=1 SV=1
97,TRUE,Q9UM54	MYO6_HUMAN,327.51688,31,5126.928,1524.4967,941.0679,5500.104,8277.439,7216.9277,13626.262,17277.873,31,16,18,18,25,36,34,39,44,Oxidation (M); Carbamidomethylation,149691.06,Unconventional myosin-VI OS=Homo sapiens OX=9606 GN=MYO6 PE=1 SV=4
121,FALSE,P09104	ENOG_HUMAN,135.09758,3,,331.61194,1393.0747,,3376.082,,4880.6963,,3,,1,1,1,3,,2,,Carbamidomethylation,47268.574,Gamma-enolase OS=Homo sapiens OX=9606 GN=ENO2 PE=1 SV=3
414,TRUE,P53985	MOT1_HUMAN,261.78622,10,41751.98,31159.154,21376.568,38361.414,38793.746,47858.516,46652.91,53444.043,10,27,18,23,23,24,28,26,33,Oxidation (M),53944.145,Monocarboxylate transporter 1 OS=Homo sapiens OX=9606 GN=SLC16A1 PE=1 SV=3
37,TRUE,Q9UIW2	PLXA1_HUMAN,391.48935,51,48896.285,32057.291,17372.592,39782.113,31730.03,34883.547,47607.83,49703.56,40,90,80,86,85,88,76,81,101,Oxidation (M); Carbamidomethylation,211067.05,Plexin-A1 OS=Homo sapiens OX=9606 GN=PLXNA1 PE=1 SV=3
787,TRUE,O95786	DDX58_HUMAN,85.3286,3,,,,,,143.03247,,,3,,,,,,1,2,1,,106599.66,Antiviral innate immune response receptor RIG-I OS=Homo sapiens OX=9606 GN=DDX58 PE=1 SV=2
719,TRUE,Q92854	SEM4D_HUMAN,170.58852,4,,230.7769,,282.94437,128.76192,148.35056,296.06866,491.463,4,2,2,1,1,3,1,3,4,,96149.9,Semaphorin-4D OS=Homo sapiens OX=9606 GN=SEMA4D PE=1 SV=1
667,TRUE,O43291	SPIT2_HUMAN,162.54083,5,10859.717,8281.736,5939.9316,10006.59,28517.336,23332.25,49495.703,37888.26,5,9,7,8,7,12,12,16,15,Carbamidomethylation,28228.152,Kunitz-type protease inhibitor 2 OS=Homo sapiens OX=9606 GN=SPINT2 PE=1 SV=2
855,TRUE,Q9H813	PACC1_HUMAN,82.4517,3,275.6704,,,,75.131996,,,364.76862,3,4,2,,2,2,,1,4,,40043.12,Proton-activated chloride channel OS=Homo sapiens OX=9606 GN=PACC1 PE=1 SV=1
328,TRUE,Q9Y6M7	S4A7_HUMAN,257.4322,13,1645.9104,1693.5596,370.36136,2436.558,247.82318,110.94024,786.4925,822.3129,13,20,16,11,14,7,5,15,10,Oxidation (M),136044,Sodium bicarbonate cotransporter 3 OS=Homo sapiens OX=9606 GN=SLC4A7 PE=1 SV=2
971,TRUE,Q96RD7	PANX1_HUMAN,92.20919,2,,,,,,,,206.94693,2,2,1,1,2,1,,1,1,,48050.113,Pannexin-1 OS=Homo sapiens OX=9606 GN=PANX1 PE=1 SV=4
947,TRUE,Q9P0V3	SH3B4_HUMAN,103.381805,2,,,,,,,,,2,,,,1,,1,,2,,107495.78,SH3 domain-binding protein 4 OS=Homo sapiens OX=9606 GN=SH3BP4 PE=1 SV=1
66,TRUE,Q8WUM4	PDC6I_HUMAN,375.1055,43,17434.242,12091.277,17417.576,30050.17,59200.758,60571.844,87264.98,87543.08,42,40,32,42,54,70,67,86,70,Acetylation (N-term); Carbamidomethylation; Oxidation (M),96023.164,Programmed cell death 6-interacting protein OS=Homo sapiens OX=9606 GN=PDCD6IP PE=1 SV=1
192,TRUE,Q9NQC3	RTN4_HUMAN,306.92044,20,126967.19,95533.8,68568.875,112324.266,17750.898,15153.625,26257.664,33955.383,20,50,49,36,45,19,17,27,32,Oxidation (M); Carbamidomethylation,129931.414,Reticulon-4 OS=Homo sapiens OX=9606 GN=RTN4 PE=1 SV=2
143,TRUE,P38606	VATA_HUMAN,308.38654,22,5606.3823,2018.3613,867.4872,4192.481,2296.5337,4046.3127,6246.7437,8194.922,22,26,25,19,26,23,25,23,27,Oxidation (M); Carbamidomethylation,68304.08,V-type proton ATPase catalytic subunit A OS=Homo sapiens OX=9606 GN=ATP6V1A PE=1 SV=2
468,TRUE,Q9NZQ7	PD1L1_HUMAN,221.25325,9,12826.509,5974.6963,5980.3857,10188.852,7922.114,3224.4478,9771.316,12540.273,9,13,12,9,15,12,12,12,13,Carbamidomethylation,33275.344,Programmed cell death 1 ligand 1 OS=Homo sapiens OX=9606 GN=CD274 PE=1 SV=1
493,TRUE,O60245	PCDH7_HUMAN,206.23088,9,2019.9863,1408.5734,140.54921,580.1273,966.3418,635.69995,985.21436,1299.251,9,13,11,2,4,9,5,7,8,,116070.93,Protocadherin-7 OS=Homo sapiens OX=9606 GN=PCDH7 PE=1 SV=2
983,TRUE,Q6PFW1	VIP1_HUMAN,86.16141,2,,,,,99.85025,,,277.67712,2,,,,,1,,1,2,,159521.06,Inositol hexakisphosphate and diphosphoinositol-pentakisphosphate kinase 1 OS=Homo sapiens OX=9606 GN=PPIP5K1 PE=1 SV=1
374,TRUE,P09211	GSTP1_HUMAN,242.92563,10,,1378.7721,1172.6808,2100.2,6584.4995,4461.7153,4880.6475,7060.4214,10,3,2,3,4,12,10,8,9,Oxidation (M),23355.826,Glutathione S-transferase P OS=Homo sapiens OX=9606 GN=GSTP1 PE=1 SV=2
697,TRUE,Q8IUH5	ZDH17_HUMAN,123.28884,5,643.555,235.60501,157.05621,664.6038,555.7876,474.04523,803.2854,852.813,5,6,4,2,2,3,2,3,3,,72639.84,Palmitoyltransferase ZDHHC17 OS=Homo sapiens OX=9606 GN=ZDHHC17 PE=1 SV=2
644,TRUE,O95721	SNP29_HUMAN,113.34268,4,,,317.65225,622.9812,241.63599,,790.62006,561.813,4,1,,4,1,2,,3,3,Oxidation (M),28970.32,Synaptosomal-associated protein 29 OS=Homo sapiens OX=9606 GN=SNAP29 PE=1 SV=1
7,TRUE,P15924	DESP_HUMAN,443.5715,111,72518.76,51331.086,5474.9575,24158.156,15863.876,25025.594,23666.98,31215.232,110,154,134,56,80,77,95,89,93,Oxidation (M); Carbamidomethylation,331773.88,Desmoplakin OS=Homo sapiens OX=9606 GN=DSP PE=1 SV=3
550,TRUE,Q16186	ADRM1_HUMAN,162.29584,6,1480.3041,,726.2289,251.23401,395.32098,3174.399,1283.9941,2238.1787,6,3,,1,2,6,6,8,10,Oxidation (M); Carbamidomethylation,42153.254,Proteasomal ubiquitin receptor ADRM1 OS=Homo sapiens OX=9606 GN=ADRM1 PE=1 SV=2
559,TRUE,Q9UKE5	TNIK_HUMAN,168.30391,6,709.6188,287.21436,1052.698,3096.573,2487.2668,5554.517,4192.866,4894.682,6,2,3,3,7,5,6,8,8,Oxidation (M),154943.2,TRAF2 and NCK-interacting protein kinase OS=Homo sapiens OX=9606 GN=TNIK PE=1 SV=1
424,TRUE,P04439	HLAA_HUMAN,276.8911,10,42545.426,27020.98,25653.55,37282.75,25041,22148.12,35958.934,44246.082,5,25,24,19,24,18,20,18,26,Acetylation (N-term); Carbamidomethylation,40840.723,"HLA class I histocompatibility antigen, A alpha chain OS=Homo sapiens OX=9606 GN=HLA-A PE=1 SV=2"
528,TRUE,O00161	SNP23_HUMAN,196.47693,7,4833.307,2440.6038,2715.2087,4181.099,956.90247,1929.5048,1807.8378,3883.5532,7,10,9,7,10,5,7,13,7,Oxidation (M),23354.041,Synaptosomal-associated protein 23 OS=Homo sapiens OX=9606 GN=SNAP23 PE=1 SV=1
593,TRUE,P54105	ICLN_HUMAN,129.45023,4,515.6079,,,1194.692,1985.237,1437.4895,1587.0314,3096.697,4,1,2,2,2,5,2,6,7,Oxidation (M),26215.312,Methylosome subunit pICln OS=Homo sapiens OX=9606 GN=CLNS1A PE=1 SV=1
714,TRUE,Q01628	IFM3_HUMAN,172.22292,3,11347.622,4022.1333,3823.0103,7057.0547,2101.2642,4064.119,6641.763,7572.3384,3,12,9,10,11,5,7,10,9,Oxidation (M); Acetylation (N-term),14632.091,Interferon-induced transmembrane protein 3 OS=Homo sapiens OX=9606 GN=IFITM3 PE=1 SV=2
289,TRUE,P52292	IMA1_HUMAN,288.38977,14,11836.818,7274.752,5809.3657,15451.383,10520.286,14375.348,17242.957,22673.84,14,20,17,21,21,25,22,29,28,Oxidation (M),57861.914,Importin subunit alpha-1 OS=Homo sapiens OX=9606 GN=KPNA2 PE=1 SV=1
248,TRUE,Q01518	CAP1_HUMAN,280.80707,15,412.7063,157.75073,735.94507,1658.5278,1487.8313,1599.6394,3537.3984,6097.8657,14,6,1,5,12,11,9,22,21,Carbamidomethylation; Oxidation (M),51901.457,Adenylyl cyclase-associated protein 1 OS=Homo sapiens OX=9606 GN=CAP1 PE=1 SV=5
745,TRUE,P31939	PUR9_HUMAN,95.7834,4,,,,169.98839,,,,,4,,,,2,1,,1,,Carbamidomethylation,64615.87,Bifunctional purine biosynthesis protein ATIC OS=Homo sapiens OX=9606 GN=ATIC PE=1 SV=3
977,TRUE,P84074	HPCA_HUMAN,85.14081,2,,,,359.4042,,327.20776,1061.569,901.5394,2,2,3,3,2,4,3,2,2,,22427.402,Neuron-specific calcium-binding protein hippocalcin OS=Homo sapiens OX=9606 GN=HPCA PE=1 SV=2
912,TRUE,O43688	PLPP2_HUMAN,93.7462,2,1267.5925,1129.3591,,258.36105,518.493,533.25543,1128.9039,349.4497,2,2,3,2,3,1,2,3,2,,32573.771,Phospholipid phosphatase 2 OS=Homo sapiens OX=9606 GN=PLPP2 PE=1 SV=1
265,TRUE,P18433	PTPRA_HUMAN,239.78152,16,3537.0342,1669.2573,1214.6858,1955.4255,2038.8528,2168.4106,3352.3342,4667.136,16,9,6,3,7,8,11,19,17,,90719.05,Receptor-type tyrosine-protein phosphatase alpha OS=Homo sapiens OX=9606 GN=PTPRA PE=1 SV=3
494,TRUE,P01116	RASK_HUMAN,190.33739,9,255.58415,460.7719,,,,174.2233,386.00024,397.97168,3,6,9,8,13,7,9,12,7,Oxidation (M),21655.824,GTPase KRas OS=Homo sapiens OX=9606 GN=KRAS PE=1 SV=1
117,TRUE,Q92974	ARHG2_HUMAN,328.80237,29,4083.333,646.137,2717.776,3835.8906,4602.2856,9491.315,17562.05,20716.406,28,21,16,18,23,38,30,40,40,Oxidation (M),111542.55,Rho guanine nucleotide exchange factor 2 OS=Homo sapiens OX=9606 GN=ARHGEF2 PE=1 SV=4
513,TRUE,P35568	IRS1_HUMAN,165.13597,8,201.84471,85.06192,,,521.2023,653.07166,771.2306,717.322,8,1,2,,,6,7,5,5,Oxidation (M),131590.97,Insulin receptor substrate 1 OS=Homo sapiens OX=9606 GN=IRS1 PE=1 SV=1
181,TRUE,Q12907	LMAN2_HUMAN,286.08936,17,53938.727,36514.734,24430.988,44322.816,5409.276,7031.1255,11798.092,16355.119,17,40,42,36,49,13,21,17,21,Oxidation (M); Carbamidomethylation,40228.664,Vesicular integral-membrane protein VIP36 OS=Homo sapiens OX=9606 GN=LMAN2 PE=1 SV=1
161,TRUE,Q8WVM8	SCFD1_HUMAN,314.57327,20,18517.697,8674.445,4542.708,9030.386,1067.4844,1434.0298,3301.7002,4868.8027,20,37,27,24,27,15,13,23,22,Carbamidomethylation; Oxidation (M),72379.84,Sec1 family domain-containing protein 1 OS=Homo sapiens OX=9606 GN=SCFD1 PE=1 SV=4
174,TRUE,Q9NYQ6	CELR1_HUMAN,275.84464,21,5974.958,4448.997,1188.8206,5021.1206,2727.6316,834.7782,2681.5085,5207.565,21,25,21,16,24,16,16,18,21,Oxidation (M),329486.25,Cadherin EGF LAG seven-pass G-type receptor 1 OS=Homo sapiens OX=9606 GN=CELSR1 PE=1 SV=1
240,TRUE,Q08345	DDR1_HUMAN,285.95612,16,11291.1455,6823.4565,4311.1934,9176.738,6017.994,8573.465,14291.6455,13334.653,15,22,15,20,17,18,16,24,23,Oxidation (M); Carbamidomethylation,101127.64,Epithelial discoidin domain-containing receptor 1 OS=Homo sapiens OX=9606 GN=DDR1 PE=1 SV=1
706,TRUE,P30530	UFO_HUMAN,123.86755,4,418.3669,,,,,190.26578,,905.0058,3,3,1,1,1,2,2,6,5,,98336.71,Tyrosine-protein kinase receptor UFO OS=Homo sapiens OX=9606 GN=AXL PE=1 SV=4
346,TRUE,Q15084	PDIA6_HUMAN,266.9807,13,11080.51,5324.027,5327.4463,10269.111,14323.721,15913.009,16413.584,23082.57,13,15,8,13,12,15,21,16,19,,48121.32,Protein disulfide-isomerase A6 OS=Homo sapiens OX=9606 GN=PDIA6 PE=1 SV=1
118,TRUE,O75976	CBPD_HUMAN,308.43335,29,13110.266,6641.4575,4269.0034,10180.571,2439.7534,1816.4854,7689.6797,9020.186,29,33,23,24,26,13,13,17,33,Oxidation (M); Carbamidomethylation,152931.05,Carboxypeptidase D OS=Homo sapiens OX=9606 GN=CPD PE=1 SV=2
315,TRUE,Q93050	VPP1_HUMAN,221.40546,11,5825.928,3907.5847,1145.8434,5191.75,119.08051,468.32397,894.58655,1923.3313,10,13,12,9,16,5,2,8,8,Oxidation (M); Carbamidomethylation,96412.72,V-type proton ATPase 116 kDa subunit a1 OS=Homo sapiens OX=9606 GN=ATP6V0A1 PE=1 SV=3
491,TRUE,P07948	LYN_HUMAN,180.84288,9,393.1365,358.22897,,240.67822,338.62732,,1449.6616,2331.1975,6,14,17,6,9,9,9,18,11,,58574.082,Tyrosine-protein kinase Lyn OS=Homo sapiens OX=9606 GN=LYN PE=1 SV=3
114,FALSE,A6NMY6	AXA2L_HUMAN,340.53464,22,242574.25,186535.14,156082.94,250682.14,192514.88,171545.28,205900.64,256914.23,22,64,76,63,75,71,80,72,72,Carbamidomethylation; Acetylation (N-term); Oxidation (M),38659.008,Putative annexin A2-like protein OS=Homo sapiens OX=9606 GN=ANXA2P2 PE=5 SV=2
65,TRUE,Q14126	DSG2_HUMAN,384.88852,38,79442.2,49936.305,23856.408,44973.105,43580.44,50386.74,60947.75,73978.68,38,81,72,56,67,65,66,80,83,Oxidation (M); Carbamidomethylation,122293.92,Desmoglein-2 OS=Homo sapiens OX=9606 GN=DSG2 PE=1 SV=2
857,TRUE,Q8WU76	SCFD2_HUMAN,86.67882,3,287.25867,,,,,,,180.63524,3,3,,,,1,,,2,,75127.14,Sec1 family domain-containing protein 2 OS=Homo sapiens OX=9606 GN=SCFD2 PE=1 SV=2
299,TRUE,Q9Y666	S12A7_HUMAN,243.03294,13,2931.531,1690.638,435.0337,3705.4617,1107.5256,200.06549,1756.783,3323.124,13,19,13,7,17,8,8,12,16,Oxidation (M),119105.836,Solute carrier family 12 member 7 OS=Homo sapiens OX=9606 GN=SLC12A7 PE=1 SV=3
669,TRUE,O75146	HIP1R_HUMAN,139.98016,5,444.05225,,,,,,,275.19046,5,3,2,,3,3,2,3,3,Oxidation (M),119388.31,Huntingtin-interacting protein 1-related protein OS=Homo sapiens OX=9606 GN=HIP1R PE=1 SV=2
500,TRUE,P11234	RALB_HUMAN,175.75783,7,6559.0586,2509.5479,4265.0273,6240.27,681.1907,1304.396,1731.4375,2226.317,4,11,8,8,12,4,4,5,4,Oxidation (M),23408.545,Ras-related protein Ral-B OS=Homo sapiens OX=9606 GN=RALB PE=1 SV=1
515,TRUE,P61586	RHOA_HUMAN,181.80534,6,756.9946,850.18726,530.1234,1261.848,215.80202,135.62166,700.5325,1177,2,11,10,14,13,6,8,8,11,Oxidation (M); Carbamidomethylation,21768.123,Transforming protein RhoA OS=Homo sapiens OX=9606 GN=RHOA PE=1 SV=1
930,TRUE,Q9H0T7	RAB17_HUMAN,72.34302,2,190.71599,,,,,,,512.7326,2,1,1,,,1,1,,2,,23490.84,Ras-related protein Rab-17 OS=Homo sapiens OX=9606 GN=RAB17 PE=1 SV=2
474,TRUE,P15151	PVR_HUMAN,219.26733,7,22193.791,17162.023,6347.5435,19537.486,16698.54,17671.086,26645.49,31098.594,7,19,19,15,18,19,16,17,18,Oxidation (M),45302.6,Poliovirus receptor OS=Homo sapiens OX=9606 GN=PVR PE=1 SV=2
573,TRUE,Q02413	DSG1_HUMAN,178.12354,7,3104.373,1208.8103,,,,70.15611,,180.85834,7,10,11,,,,1,,1,Oxidation (M),113747.586,Desmoglein-1 OS=Homo sapiens OX=9606 GN=DSG1 PE=1 SV=2
133,TRUE,P04406	G3P_HUMAN,346.5215,21,17176.564,12528.586,3661.8645,10548.105,37410.71,36658.266,31165.365,37402.758,21,30,28,20,26,55,46,42,44,Carbamidomethylation; Oxidation (M),36053.207,Glyceraldehyde-3-phosphate dehydrogenase OS=Homo sapiens OX=9606 GN=GAPDH PE=1 SV=3
128,TRUE,P12235	ADT1_HUMAN,303.94147,26,18184.324,12628.015,9985.273,16389.133,16052.923,17760.541,22727.729,27846.826,8,70,56,58,66,66,58,71,64,Carbamidomethylation; Acetylation (N-term); Oxidation (M),33064.492,ADP/ATP translocase 1 OS=Homo sapiens OX=9606 GN=SLC25A4 PE=1 SV=4
40,TRUE,P08581	MET_HUMAN,412.1379,46,171736.45,132754.3,80240.51,137936.22,120753.46,116954.516,158874.17,182614.34,45,112,105,85,109,88,81,108,100,Oxidation (M); Carbamidomethylation,155541.3,Hepatocyte growth factor receptor OS=Homo sapiens OX=9606 GN=MET PE=1 SV=4
524,TRUE,Q14156	EFR3A_HUMAN,187.24886,8,1149.282,591.9265,,402.99237,141.65439,444.4456,1456.5033,2209.9863,8,4,6,4,5,6,3,8,7,Oxidation (M),92924.34,Protein EFR3 homolog A OS=Homo sapiens OX=9606 GN=EFR3A PE=1 SV=2
385,FALSE,Q13153	PAK1_HUMAN,121.958534,2,,,,115.02692,,,,,2,1,,3,3,1,,,1,Oxidation (M),60646.883,Serine/threonine-protein kinase PAK 1 OS=Homo sapiens OX=9606 GN=PAK1 PE=1 SV=2
624,TRUE,P36404	ARL2_HUMAN,177.36034,6,1178.8143,285.63824,,,452.29303,1101.1062,2649.741,3886.0503,6,4,2,2,,3,2,9,8,,20877.994,ADP-ribosylation factor-like protein 2 OS=Homo sapiens OX=9606 GN=ARL2 PE=1 SV=4
960,TRUE,P21860	ERBB3_HUMAN,60.01907,2,,,,,,,,,2,,,,1,,,1,,,148098.19,Receptor tyrosine-protein kinase erbB-3 OS=Homo sapiens OX=9606 GN=ERBB3 PE=1 SV=1
769,TRUE,Q9C004	SPY4_HUMAN,152.86293,4,,,,,,713.61255,160.77802,1674.7134,4,1,2,1,1,3,3,5,5,,32541.375,Protein sprouty homolog 4 OS=Homo sapiens OX=9606 GN=SPRY4 PE=1 SV=2
284,TRUE,Q16555	DPYL2_HUMAN,255.91997,12,,,253.18842,121.448135,1742.1501,2153.1692,3364.9414,5417.761,12,1,,5,9,16,12,14,13,Oxidation (M),62293.62,Dihydropyrimidinase-related protein 2 OS=Homo sapiens OX=9606 GN=DPYSL2 PE=1 SV=1
121,FALSE,P13929	ENOB_HUMAN,161.28203,4,209.25793,485.56335,1393.0747,128.69667,6061.9473,808.0598,5371.9946,581.4307,4,2,3,1,2,6,1,3,1,Carbamidomethylation,46986.875,Beta-enolase OS=Homo sapiens OX=9606 GN=ENO3 PE=1 SV=5
698,TRUE,P36507	MP2K2_HUMAN,135.17393,5,,,,153.40976,,,,680.1169,4,,,1,1,1,,4,6,,44424.12,Dual specificity mitogen-activated protein kinase kinase 2 OS=Homo sapiens OX=9606 GN=MAP2K2 PE=1 SV=1
598,TRUE,P21964	COMT_HUMAN,183.22185,5,1983.0203,1086.0818,424.43405,1129.2693,265.8881,937.6859,2322.3147,5751.3896,5,6,7,2,3,2,3,6,5,Carbamidomethylation; Oxidation (M),30037.049,Catechol O-methyltransferase OS=Homo sapiens OX=9606 GN=COMT PE=1 SV=2
487,TRUE,Q8IZP0	ABI1_HUMAN,196.07484,8,3979.8127,2286.7979,2484.6929,5076.81,2229.6807,4433.7812,2932.6401,3904.1118,8,5,2,5,6,4,7,6,8,Acetylation (N-term); Oxidation (M); Carbamidomethylation,55080.84,Abl interactor 1 OS=Homo sapiens OX=9606 GN=ABI1 PE=1 SV=4
10,TRUE,P05787	K2C8_HUMAN,530.6945,72,3912830.8,3121822.5,1883434,2793823.2,2397841,2509101.8,3027701.8,3436405.8,58,606,553,428,530,466,447,545,580,Oxidation (M),53704.242,"Keratin, type II cytoskeletal 8 OS=Homo sapiens OX=9606 GN=KRT8 PE=1 SV=7"
125,TRUE,Q9H4M9	EHD1_HUMAN,293.11176,24,3923.342,2307.5286,3079.248,7630.365,10327.68,10974.147,23030.02,30774.754,16,20,17,28,28,36,42,43,45,Oxidation (M),60626.86,EH domain-containing protein 1 OS=Homo sapiens OX=9606 GN=EHD1 PE=1 SV=2
978,TRUE,Q9UBN6	TR10D_HUMAN,85.87677,2,,,,,,103.257095,179.58324,,2,,2,,,1,1,2,1,,41823.395,Tumor necrosis factor receptor superfamily member 10D OS=Homo sapiens OX=9606 GN=TNFRSF10D PE=1 SV=1
206,TRUE,Q9H4L5	OSBL3_HUMAN,282.28564,16,2673.9116,1147.0933,556.7699,1664.4149,6065.9795,5148.44,6987.661,8472.835,16,13,7,6,7,19,15,18,17,Oxidation (M),101223.625,Oxysterol-binding protein-related protein 3 OS=Homo sapiens OX=9606 GN=OSBPL3 PE=1 SV=1
830,TRUE,Q8IWW6	RHG12_HUMAN,110.07519,3,,,,,,,,,3,,,,,1,2,2,2,,96254.43,Rho GTPase-activating protein 12 OS=Homo sapiens OX=9606 GN=ARHGAP12 PE=1 SV=1
840,TRUE,P27797	CALR_HUMAN,106.99609,3,,,,530.17346,271.31573,226.12094,624.06104,859.1596,3,,1,3,1,3,1,1,2,Carbamidomethylation,48141.555,Calreticulin OS=Homo sapiens OX=9606 GN=CALR PE=1 SV=1
45,TRUE,Q29RF7	PDS5A_HUMAN,414.88937,46,19094.656,12077.924,10807.854,22656.152,32333.137,35717.78,31791.365,46429.89,46,44,54,51,64,68,73,88,80,Oxidation (M),150830.16,Sister chromatid cohesion protein PDS5 homolog A OS=Homo sapiens OX=9606 GN=PDS5A PE=1 SV=1
661,TRUE,Q96J84	KIRR1_HUMAN,141.87265,5,733.85254,330.0514,,,,,588.16547,1093.5372,5,4,6,,2,2,2,4,4,Oxidation (M),83535.77,Kin of IRRE-like protein 1 OS=Homo sapiens OX=9606 GN=KIRREL1 PE=1 SV=2
485,TRUE,P04040	CATA_HUMAN,182.27493,9,1698.2935,688.94,422.40228,1289.3331,,190.15007,513.5154,746.0067,9,6,8,3,12,1,5,2,4,Carbamidomethylation,59756.168,Catalase OS=Homo sapiens OX=9606 GN=CAT PE=1 SV=3
1003,TRUE,Q96P63	SPB12_HUMAN,114.416245,2,247.07346,,,,,,,,2,1,2,,,,,,,,46276.418,Serpin B12 OS=Homo sapiens OX=9606 GN=SERPINB12 PE=1 SV=1
418,TRUE,P78536	ADA17_HUMAN,203.73488,9,6006.2744,3396.6643,1065.6898,3683.852,2048.4053,2763.219,4081.09,5303.47,9,5,10,9,9,7,8,11,10,Carbamidomethylation; Oxidation (M),93020.95,Disintegrin and metalloproteinase domain-containing protein 17 OS=Homo sapiens OX=9606 GN=ADAM17 PE=1 SV=1
23,TRUE,Q14008	CKAP5_HUMAN,370.99673,60,5514.9614,1177.0557,6365.8794,17273.38,29215.43,30817.21,37909.67,41159.95,60,21,12,31,54,74,73,69,83,Oxidation (M); Carbamidomethylation,225494.55,Cytoskeleton-associated protein 5 OS=Homo sapiens OX=9606 GN=CKAP5 PE=1 SV=3
921,TRUE,Q6ZRP7	QSOX2_HUMAN,70.91134,2,,,,,,,,149.99738,2,1,,,1,,,,1,,77528.734,Sulfhydryl oxidase 2 OS=Homo sapiens OX=9606 GN=QSOX2 PE=1 SV=3
269,TRUE,O75116	ROCK2_HUMAN,224.95851,16,1409.0345,,712.522,1259.8756,2085.5889,3136.5938,1071.2634,2029.2231,14,2,1,1,3,9,11,11,16,Acetylation (N-term),160899.83,Rho-associated protein kinase 2 OS=Homo sapiens OX=9606 GN=ROCK2 PE=1 SV=4
980,TRUE,P14735	IDE_HUMAN,60.717056,2,,,,,,74.368355,,200.97295,2,,,,,,1,,2,,117968.49,Insulin-degrading enzyme OS=Homo sapiens OX=9606 GN=IDE PE=1 SV=4
251,TRUE,P21796	VDAC1_HUMAN,332.01257,17,89270.76,67964.89,66906.16,93202.52,14882.738,14723.486,21803.193,28855.514,17,34,34,37,43,17,12,19,18,Carbamidomethylation; Oxidation (M),30772.59,Voltage-dependent anion-selective channel protein 1 OS=Homo sapiens OX=9606 GN=VDAC1 PE=1 SV=2
296,TRUE,Q9HBM0	VEZA_HUMAN,246.88843,14,1641.3713,1381.9954,485.60474,1405.6211,1342.4108,2047.7118,2885.121,4400.705,14,6,8,4,6,8,12,14,16,Oxidation (M),88664.57,Vezatin OS=Homo sapiens OX=9606 GN=VEZT PE=1 SV=3
945,TRUE,Q9Y4B5	MTCL1_HUMAN,78.14099,2,,,,,,,,116.16939,2,,,,,,,,2,,209525.98,Microtubule cross-linking factor 1 OS=Homo sapiens OX=9606 GN=MTCL1 PE=1 SV=5
577,TRUE,Q01973	ROR1_HUMAN,149.3296,6,3557.972,1401.3527,973.7677,2857.4314,2364.0615,2042.0485,3916.5752,6023.57,6,8,7,6,11,6,6,7,7,Oxidation (M),104282.61,Inactive tyrosine-protein kinase transmembrane receptor ROR1 OS=Homo sapiens OX=9606 GN=ROR1 PE=1 SV=2
752,TRUE,Q8NE01	CNNM3_HUMAN,121.84269,4,,,,,,,,208.13298,3,2,3,1,1,1,1,1,4,,76119.195,Metal transporter CNNM3 OS=Homo sapiens OX=9606 GN=CNNM3 PE=1 SV=1
603,TRUE,Q9UKS6	PACN3_HUMAN,187.9536,6,822.2122,132.55473,96.337875,1119.854,,,381.5146,283.28946,6,8,6,5,9,2,1,6,2,,48486.797,Protein kinase C and casein kinase substrate in neurons protein 3 OS=Homo sapiens OX=9606 GN=PACSIN3 PE=1 SV=2
568,TRUE,P08648	ITA5_HUMAN,179.33578,7,433.46445,278.9613,,87.532845,310.38168,,216.82133,1013.5497,7,3,4,,5,6,2,2,4,Oxidation (M),114536.49,Integrin alpha-5 OS=Homo sapiens OX=9606 GN=ITGA5 PE=1 SV=2
496,TRUE,Q92797	SYMPK_HUMAN,169.31523,9,358.34607,108.03252,127.36813,259.1659,236.80226,558.923,212.92786,1008.9073,9,4,2,3,2,5,5,2,6,Oxidation (M),141148.38,Symplekin OS=Homo sapiens OX=9606 GN=SYMPK PE=1 SV=2
343,FALSE,P16157	ANK1_HUMAN,51.097694,2,,,,235.2886,,,227.00073,243.86641,2,,,,1,,,1,2,,206264.77,Ankyrin-1 OS=Homo sapiens OX=9606 GN=ANK1 PE=1 SV=3
420,TRUE,Q99714	HCD2_HUMAN,226.56537,9,159.47682,,,,359.54697,992.12646,801.3192,680.6497,9,8,7,4,6,16,16,19,14,Oxidation (M),26923.08,3-hydroxyacyl-CoA dehydrogenase type-2 OS=Homo sapiens OX=9606 GN=HSD17B10 PE=1 SV=3
722,TRUE,O43865	SAHH2_HUMAN,135.07808,4,541.9282,319.39874,168.98404,454.18018,752.3068,844.4796,1524.6694,2014.408,4,3,3,1,3,3,2,6,7,,58951.42,S-adenosylhomocysteine hydrolase-like protein 1 OS=Homo sapiens OX=9606 GN=AHCYL1 PE=1 SV=2
621,TRUE,Q9H2H9	S38A1_HUMAN,131.82428,6,4767.9453,3261.9277,2229.0225,5188.934,2842.3643,3859.8599,4618.3237,5444.767,6,4,7,6,5,5,6,9,6,,54047.598,Sodium-coupled neutral amino acid transporter 1 OS=Homo sapiens OX=9606 GN=SLC38A1 PE=1 SV=1
476,TRUE,Q8N3R9	MPP5_HUMAN,188.74928,8,,,,225.37842,101.37576,,413.69308,908.48883,8,4,3,,2,4,4,5,7,Oxidation (M),77293.54,MAGUK p55 subfamily member 5 OS=Homo sapiens OX=9606 GN=MPP5 PE=1 SV=3
911,TRUE,O60291	MGRN1_HUMAN,62.949272,2,,,,,,,,102.28754,2,,,,,1,1,,2,,60752.98,E3 ubiquitin-protein ligase MGRN1 OS=Homo sapiens OX=9606 GN=MGRN1 PE=1 SV=2
469,TRUE,P10321	HLAC_HUMAN,289.04916,9,27482.492,20486.691,16164.207,24919.68,18739.328,21431.104,26791.777,32741.123,3,25,18,16,22,18,22,22,25,Carbamidomethylation,40648.53,"HLA class I histocompatibility antigen, C alpha chain OS=Homo sapiens OX=9606 GN=HLA-C PE=1 SV=3"
42,TRUE,P49368	TCPG_HUMAN,408.3489,38,274203.8,208450.55,135571.3,219086.95,272207.7,305991.4,354206.78,389857.56,38,127,117,108,127,143,146,160,173,Oxidation (M); Carbamidomethylation,60533.883,T-complex protein 1 subunit gamma OS=Homo sapiens OX=9606 GN=CCT3 PE=1 SV=4
922,TRUE,P43007	SATT_HUMAN,89.44914,2,649.3761,,181.94598,434.30008,,,281.7447,612.542,2,2,1,5,4,4,1,3,4,,55723.074,Neutral amino acid transporter A OS=Homo sapiens OX=9606 GN=SLC1A4 PE=1 SV=1
658,TRUE,Q13572	ITPK1_HUMAN,179.02434,5,,,,847.1724,1539.099,232.91528,1378.4828,597.6447,5,,,2,5,6,9,5,4,,45621.047,Inositol-tetrakisphosphate 1-kinase OS=Homo sapiens OX=9606 GN=ITPK1 PE=1 SV=2
408,TRUE,P15531	NDKA_HUMAN,197.66687,8,1897.1628,1135.8456,1160.5424,4340.843,7841.128,6532.501,5984.305,6936.6914,8,12,12,8,9,13,14,13,10,Oxidation (M); Carbamidomethylation,17148.72,Nucleoside diphosphate kinase A OS=Homo sapiens OX=9606 GN=NME1 PE=1 SV=1
875,TRUE,P15941	MUC1_HUMAN,109.90222,3,1423.015,902.8579,449.1479,993.66675,229.4812,610.1306,1021.0899,1465.6833,3,5,3,1,3,3,2,1,4,,122102.29,Mucin-1 OS=Homo sapiens OX=9606 GN=MUC1 PE=1 SV=3
712,TRUE,Q01831	XPC_HUMAN,136.4419,4,139.07016,,108.448,271.10883,,102.81492,105.74164,881.4496,4,5,2,2,4,2,5,2,4,,105952.69,DNA repair protein complementing XP-C cells OS=Homo sapiens OX=9606 GN=XPC PE=1 SV=4
633,TRUE,O43490	PROM1_HUMAN,174.5021,5,582.7141,462.90765,,488.59814,296.4049,270.02454,613.66583,804.82935,5,3,2,3,5,5,2,7,6,Oxidation (M),97202.05,Prominin-1 OS=Homo sapiens OX=9606 GN=PROM1 PE=1 SV=1
527,TRUE,O15260	SURF4_HUMAN,187.4678,5,2766.1218,1862.7213,979.3627,3806.342,943.4573,1327.0039,2718.5886,1170.405,5,6,10,10,14,5,7,5,6,Oxidation (M); Carbamidomethylation,30393.996,Surfeit locus protein 4 OS=Homo sapiens OX=9606 GN=SURF4 PE=1 SV=3
382,TRUE,Q04917	1433F_HUMAN,205.50526,10,9232.743,4712.4775,10503.986,17871.668,22583.914,22743.482,23769.734,29824.125,10,9,13,13,12,17,16,16,21,Oxidation (M); Carbamidomethylation,28218.72,14-3-3 protein eta OS=Homo sapiens OX=9606 GN=YWHAH PE=1 SV=4
64,TRUE,P06756	ITAV_HUMAN,367.77747,39,98947.445,67180.984,48346.016,81586.7,65188.543,70886.266,96947.984,104716.805,39,87,83,70,81,73,72,86,75,Oxidation (M); Carbamidomethylation,116037.86,Integrin alpha-V OS=Homo sapiens OX=9606 GN=ITGAV PE=1 SV=2
759,TRUE,P10301	RRAS_HUMAN,175.85269,4,2095.0615,499.10767,548.7028,1112.8467,716.3788,889.3583,1241.001,787.8436,4,8,6,5,5,3,2,5,4,Oxidation (M),23480.488,Ras-related protein R-Ras OS=Homo sapiens OX=9606 GN=RRAS PE=1 SV=1
1001,TRUE,Q29980	MICB_HUMAN,101.90895,2,1176.5706,,137.41241,252.22382,380.29086,362.93042,781.33496,1558.0239,2,3,1,2,1,2,3,3,6,,42574.97,MHC class I polypeptide-related sequence B OS=Homo sapiens OX=9606 GN=MICB PE=1 SV=2
157,TRUE,Q06481	APLP2_HUMAN,282.20123,17,23583.906,10176.71,4979.5005,15570.194,15854.869,7055.925,10817.428,16002.108,15,34,29,18,23,32,16,25,30,Oxidation (M),86955.77,Amyloid-like protein 2 OS=Homo sapiens OX=9606 GN=APLP2 PE=1 SV=2
966,TRUE,P48047	ATPO_HUMAN,87.182594,2,,,,,332.73383,329.89136,364.1316,,2,,,,,4,4,3,,,23277.312,"ATP synthase subunit O, mitochondrial OS=Homo sapiens OX=9606 GN=ATP5PO PE=1 SV=1"
913,TRUE,P01903	DRA_HUMAN,100.54191,2,,,,,,,136.28876,,2,1,,,,,,2,1,,28606.92,"HLA class II histocompatibility antigen, DR alpha chain OS=Homo sapiens OX=9606 GN=HLA-DRA PE=1 SV=1"
152,TRUE,O75330	HMMR_HUMAN,276.45044,26,631.9326,2965.7947,3124.0354,8640.951,11797.218,10844.308,16574.762,24065.84,26,7,6,12,20,26,28,28,24,,84100.43,Hyaluronan mediated motility receptor OS=Homo sapiens OX=9606 GN=HMMR PE=1 SV=2
746,TRUE,Q9H4A6	GOLP3_HUMAN,154.77063,4,,,121.81935,182.64359,,,309.56717,705.5222,4,,,3,4,,2,8,5,,33810.53,Golgi phosphoprotein 3 OS=Homo sapiens OX=9606 GN=GOLPH3 PE=1 SV=1
432,TRUE,Q9UEW8	STK39_HUMAN,194.86838,7,,,,266.09564,1858.7244,2478.2446,2086.3564,2566.2378,7,,,1,4,8,8,14,9,Oxidation (M),59474.016,STE20/SPS1-related proline-alanine-rich protein kinase OS=Homo sapiens OX=9606 GN=STK39 PE=1 SV=3
582,TRUE,Q9H307	PININ_HUMAN,166.39977,7,4910.4,1938.4349,1469.7247,4688.525,1703.6359,1696.197,2098.7754,2378.4106,7,7,6,5,14,3,5,7,8,Oxidation (M),81627.72,Pinin OS=Homo sapiens OX=9606 GN=PNN PE=1 SV=5
796,TRUE,Q9H3Z4	DNJC5_HUMAN,138.43642,3,571.18866,1324.9609,133.91391,415.5675,,,,,3,3,5,4,4,,,2,,,22148.77,DnaJ homolog subfamily C member 5 OS=Homo sapiens OX=9606 GN=DNAJC5 PE=1 SV=1
67,TRUE,P63261	ACTG_HUMAN,418.14157,32,742.5888,280.85153,,705.2708,,,300.17313,267.73376,2,228,219,220,263,161,184,194,205,Oxidation (M); Carbamidomethylation; Acetylation (N-term),41792.836,"Actin, cytoplasmic 2 OS=Homo sapiens OX=9606 GN=ACTG1 PE=1 SV=1"
473,FALSE,P01112	RASH_HUMAN,181.52322,7,1260.7955,530.88385,,722.0823,372.1834,481.53403,819.38074,986.00995,2,6,4,7,12,5,7,11,6,,21298.129,GTPase HRas OS=Homo sapiens OX=9606 GN=HRAS PE=1 SV=1
84,TRUE,Q14160	SCRIB_HUMAN,326.36636,39,11401.58,10063.498,4538.817,9920.005,9806.816,14861.623,20260.447,21889.574,39,38,36,21,36,38,52,47,49,Oxidation (M),174884.98,Protein scribble homolog OS=Homo sapiens OX=9606 GN=SCRIB PE=1 SV=4
223,TRUE,Q9Y624	JAM1_HUMAN,277.1479,16,131380.31,100854.445,73405.29,114132.984,73002.516,87889.45,88250.516,102328.28,16,49,39,48,53,41,46,53,47,Carbamidomethylation; Oxidation (M),32583.13,Junctional adhesion molecule A OS=Homo sapiens OX=9606 GN=F11R PE=1 SV=1
17,TRUE,Q14573	ITPR3_HUMAN,435.96594,77,173664.6,129397.95,59834.406,28577.846,124155.766,132411.7,60498.812,75968.586,69,105,99,80,92,99,100,115,125,Oxidation (M); Carbamidomethylation,304106.47,"Inositol 1,4,5-trisphosphate receptor type 3 OS=Homo sapiens OX=9606 GN=ITPR3 PE=1 SV=2"
813,TRUE,Q9NYT0	PLEK2_HUMAN,107.541756,2,7681.207,,4047.021,8129.2407,,77.7054,,339.74643,2,2,3,1,5,,3,5,6,Acetylation (N-term); Oxidation (M),39970.832,Pleckstrin-2 OS=Homo sapiens OX=9606 GN=PLEK2 PE=1 SV=1
613,TRUE,Q9P246	STIM2_HUMAN,147.29091,5,640.37134,296.52573,,137.98216,,,283.90567,1343.5161,5,7,2,,3,2,3,5,3,Oxidation (M),83971.11,Stromal interaction molecule 2 OS=Homo sapiens OX=9606 GN=STIM2 PE=1 SV=2
277,TRUE,Q13418	ILK_HUMAN,193.26083,12,,,,,5887.6177,1987.6484,10608.456,15772.097,12,,,,1,5,10,10,19,Oxidation (M),51419.19,Integrin-linked protein kinase OS=Homo sapiens OX=9606 GN=ILK PE=1 SV=2
964,TRUE,Q86T03	PP4P1_HUMAN,90.9706,2,758.3694,503.70004,246.6175,545.77924,251.70184,303.4991,,685.7072,2,3,1,2,1,2,1,,1,Oxidation (M),29469.584,"Type 1 phosphatidylinositol 4,5-bisphosphate 4-phosphatase OS=Homo sapiens OX=9606 GN=PIP4P1 PE=1 SV=1"
329,TRUE,Q9Y5S2	MRCKB_HUMAN,192.38782,12,,,,152.72186,587.94885,518.68225,846.8054,1189.1953,12,,,,2,7,6,11,10,Oxidation (M),194315.31,Serine/threonine-protein kinase MRCK beta OS=Homo sapiens OX=9606 GN=CDC42BPB PE=1 SV=2
26,TRUE,O15031	PLXB2_HUMAN,451.82306,54,168066.73,116172.24,70956.08,121838.78,113425.38,123127.64,148114.67,162315.86,54,152,130,119,137,131,122,123,140,Oxidation (M); Carbamidomethylation,205127.2,Plexin-B2 OS=Homo sapiens OX=9606 GN=PLXNB2 PE=1 SV=3
896,TRUE,P62993	GRB2_HUMAN,91.44349,2,,,,,,,258.0786,1012.90283,2,2,1,1,2,4,1,5,5,,25206.348,Growth factor receptor-bound protein 2 OS=Homo sapiens OX=9606 GN=GRB2 PE=1 SV=1
126,TRUE,Q9NTJ5	SAC1_HUMAN,267.78842,25,15253.54,5410.4224,5354.7295,11257.765,461.67996,,1847.4326,1997.3162,25,42,31,34,34,5,11,16,21,Oxidation (M); Carbamidomethylation,66966.89,Phosphatidylinositol-3-phosphatase SAC1 OS=Homo sapiens OX=9606 GN=SACM1L PE=1 SV=2
48,TRUE,P53618	COPB_HUMAN,399.28375,41,34099.273,19854.686,22535.152,732178,83843.555,307919.78,104807.125,132476.61,41,66,55,65,72,100,95,103,105,Carbamidomethylation; Oxidation (M),107142.22,Coatomer subunit beta OS=Homo sapiens OX=9606 GN=COPB1 PE=1 SV=3
389,TRUE,P04083	ANXA1_HUMAN,264.36722,12,109.23653,,2653.7183,5189.199,1002.9762,288.86224,2536.7065,5091.6064,12,1,1,10,14,10,4,11,7,Oxidation (M),38714.242,Annexin A1 OS=Homo sapiens OX=9606 GN=ANXA1 PE=1 SV=2
1012,TRUE,P48509	CD151_HUMAN,105.26965,2,1098.0117,709.405,296.41803,880.5278,365.18427,449.24295,420.1106,842.12317,2,4,4,5,4,3,5,3,3,,28295.102,CD151 antigen OS=Homo sapiens OX=9606 GN=CD151 PE=1 SV=3
575,TRUE,P08134	RHOC_HUMAN,181.47577,6,,558.7833,696.0482,,808.8953,894.73224,1641.5461,1813.9452,2,10,8,9,10,6,8,7,9,Oxidation (M); Carbamidomethylation,22006.357,Rho-related GTP-binding protein RhoC OS=Homo sapiens OX=9606 GN=RHOC PE=1 SV=1
657,TRUE,P21283	VATC1_HUMAN,144.8617,5,120.16334,,,173.97733,,,286.1381,598.8002,5,2,1,2,2,2,1,3,4,,43941.605,V-type proton ATPase subunit C 1 OS=Homo sapiens OX=9606 GN=ATP6V1C1 PE=1 SV=4
87,TRUE,O00429	DNM1L_HUMAN,388.9336,33,12646.475,11407.988,3212.1147,8400.224,26551.27,22222.053,47111.625,37269.82,33,19,12,26,33,46,51,56,52,Carbamidomethylation; Oxidation (M); Acetylation (N-term),81877.15,Dynamin-1-like protein OS=Homo sapiens OX=9606 GN=DNM1L PE=1 SV=2
514,TRUE,Q8NFD5	ARI1B_HUMAN,194.82071,7,189.5676,,,240.42238,,,102.769905,209.78557,7,3,2,,4,4,3,7,5,Oxidation (M),236123.39,AT-rich interactive domain-containing protein 1B OS=Homo sapiens OX=9606 GN=ARID1B PE=1 SV=2
597,TRUE,Q14289	FAK2_HUMAN,108.912056,6,,,,,,455.31143,727.8339,159.82925,5,,,1,1,2,3,3,6,,115874.6,Protein-tyrosine kinase 2-beta OS=Homo sapiens OX=9606 GN=PTK2B PE=1 SV=2
859,TRUE,P36269	GGT5_HUMAN,112.44964,3,,163.00456,291.71277,1126.4539,,,166.90031,140.95636,3,1,2,2,3,1,1,4,5,,62261.18,Glutathione hydrolase 5 proenzyme OS=Homo sapiens OX=9606 GN=GGT5 PE=1 SV=2
572,TRUE,P15260	INGR1_HUMAN,189.7942,7,1368.6833,883.6068,216.03787,1053.9424,325.0976,838.53265,1520.6385,2382.8054,7,13,5,4,5,4,7,9,13,,54404.547,Interferon gamma receptor 1 OS=Homo sapiens OX=9606 GN=IFNGR1 PE=1 SV=1
36,FALSE,Q58FF8	H90B2_HUMAN,245.55656,10,10818.425,9553.32,20388.27,28309.36,44198.426,46427.87,66242.76,64588.004,3,32,20,39,46,49,48,60,54,Oxidation (M),44348.92,Putative heat shock protein HSP 90-beta 2 OS=Homo sapiens OX=9606 GN=HSP90AB2P PE=1 SV=2
49,TRUE,P16615	AT2A2_HUMAN,380.60013,39,129899.18,96276.61,75298.73,133550.44,70520.3,76637.76,101974.43,112937.41,39,84,89,80,92,76,67,85,91,Oxidation (M); Carbamidomethylation; Acetylation (N-term),114756.86,Sarcoplasmic/endoplasmic reticulum calcium ATPase 2 OS=Homo sapiens OX=9606 GN=ATP2A2 PE=1 SV=1
953,TRUE,P36897	TGFR1_HUMAN,99.9738,2,191.91394,,,95.24393,,,,,2,1,,,1,1,,3,1,,55959.74,TGF-beta receptor type-1 OS=Homo sapiens OX=9606 GN=TGFBR1 PE=1 SV=1
791,TRUE,O00165	HAX1_HUMAN,113.10312,3,,,963.8707,818.05743,,,,,3,4,1,1,3,,,,,Oxidation (M),31620.516,HCLS1-associated protein X-1 OS=Homo sapiens OX=9606 GN=HAX1 PE=1 SV=2
981,TRUE,P10644	KAP0_HUMAN,93.57172,2,,,,,,,,,2,,,1,1,,,2,1,,42981.69,cAMP-dependent protein kinase type I-alpha regulatory subunit OS=Homo sapiens OX=9606 GN=PRKAR1A PE=1 SV=1
9,TRUE,Q14980	NUMA1_HUMAN,500.3536,100,151172.7,74481.92,50307.402,113000.95,71501.47,80201.32,114223.7,133934.58,100,188,157,148,160,150,141,167,167,Oxidation (M); Carbamidomethylation,238259.5,Nuclear mitotic apparatus protein 1 OS=Homo sapiens OX=9606 GN=NUMA1 PE=1 SV=2
878,TRUE,P53779	MK10_HUMAN,76.84453,2,,,,,303.2727,,402.39197,415.68243,2,,,,1,1,2,4,3,Oxidation (M),52585.438,Mitogen-activated protein kinase 10 OS=Homo sapiens OX=9606 GN=MAPK10 PE=1 SV=2
273,TRUE,Q8IUD2	RB6I2_HUMAN,219.72818,15,769.5577,419.0027,1049.1718,2345.115,2041.322,2110.5618,2791.2554,5846.5317,15,6,6,12,12,13,9,12,22,Oxidation (M),128086.39,ELKS/Rab6-interacting/CAST family member 1 OS=Homo sapiens OX=9606 GN=ERC1 PE=1 SV=1
209,TRUE,O95235	KI20A_HUMAN,264.22452,18,2481.2485,735.5418,760.3996,2153.415,2131.0784,3412.0186,5908.8877,6974.4976,18,19,13,7,17,18,18,24,21,Oxidation (M); Carbamidomethylation,100277.96,Kinesin-like protein KIF20A OS=Homo sapiens OX=9606 GN=KIF20A PE=1 SV=1
153,TRUE,Q32MZ4	LRRF1_HUMAN,289.76984,23,1801.1707,113.40214,1199.3495,3733.158,10443.493,15224.659,13549.832,19516.098,23,11,5,10,16,24,29,36,33,Oxidation (M); Carbamidomethylation,89253.02,Leucine-rich repeat flightless-interacting protein 1 OS=Homo sapiens OX=9606 GN=LRRFIP1 PE=1 SV=2
102,TRUE,Q9UIQ6	LCAP_HUMAN,328.88226,27,31546.574,19217.203,10754.554,20917.115,14275.629,18053.314,23397.28,23776.27,27,66,52,49,62,43,52,49,50,Oxidation (M); Carbamidomethylation,117349.1,Leucyl-cystinyl aminopeptidase OS=Homo sapiens OX=9606 GN=LNPEP PE=1 SV=3
576,TRUE,Q12774	ARHG5_HUMAN,149.04887,6,,,,,,,133.4048,144.83081,6,,,,,4,,5,2,Oxidation (M),176799.48,Rho guanine nucleotide exchange factor 5 OS=Homo sapiens OX=9606 GN=ARHGEF5 PE=1 SV=3
215,TRUE,P42892	ECE1_HUMAN,265.59265,17,11169.458,7593.896,3523.0293,8524.779,2484.1338,3421.1035,4001.2368,6561.9805,17,21,16,18,22,10,12,13,14,Oxidation (M),87163.67,Endothelin-converting enzyme 1 OS=Homo sapiens OX=9606 GN=ECE1 PE=1 SV=2
649,TRUE,Q14019	COTL1_HUMAN,125.922585,4,,,1217.6741,2886.4783,,,2097.691,3458.2278,4,,,5,9,,,8,4,Oxidation (M),15944.978,Coactosin-like protein OS=Homo sapiens OX=9606 GN=COTL1 PE=1 SV=3
365,FALSE,P13796	PLSL_HUMAN,98.83759,3,,,,220.91989,215.36415,,345.59564,1754.9049,3,1,,1,3,4,3,3,3,Oxidation (M),70288.39,Plastin-2 OS=Homo sapiens OX=9606 GN=LCP1 PE=1 SV=6
705,TRUE,Q9Y5E7	PCDB2_HUMAN,123.89643,4,437.66748,,,176.94254,,,,520.02356,4,2,1,,2,,1,,3,,87253.836,Protocadherin beta-2 OS=Homo sapiens OX=9606 GN=PCDHB2 PE=1 SV=1
397,TRUE,Q8N4S9	MALD2_HUMAN,218.59872,10,4394.1826,2454.9385,689.0292,2449.1792,1646.838,2553.797,3357.0532,5154.118,10,9,9,6,12,9,8,8,8,Oxidation (M),64168.113,MARVEL domain-containing protein 2 OS=Homo sapiens OX=9606 GN=MARVELD2 PE=1 SV=2
298,TRUE,P23528	COF1_HUMAN,296.39792,14,40518.168,29164.078,40470.023,68108.01,71030.72,78279.695,98916.54,114736.38,14,19,22,31,33,35,31,40,43,Acetylation (N-term); Carbamidomethylation; Oxidation (M),18502.488,Cofilin-1 OS=Homo sapiens OX=9606 GN=CFL1 PE=1 SV=3
95,TRUE,Q9H5V8	CDCP1_HUMAN,335.8405,31,155349.16,131283.38,88701.51,139080.6,150116.23,154917.2,234193.06,268821.88,31,82,73,69,74,86,89,100,105,Oxidation (M); Carbamidomethylation,92931.73,CUB domain-containing protein 1 OS=Homo sapiens OX=9606 GN=CDCP1 PE=1 SV=3
47,TRUE,O00571	DDX3X_HUMAN,376.62573,43,58794.72,37498.164,52134.73,87763.11,105382.26,120711.234,184553.62,221681,43,51,42,58,72,78,94,107,113,Oxidation (M); Carbamidomethylation; Acetylation (N-term),73243.414,ATP-dependent RNA helicase DDX3X OS=Homo sapiens OX=9606 GN=DDX3X PE=1 SV=3
449,TRUE,P61224	RAP1B_HUMAN,206.20193,8,4149.391,3159.2466,2590.4526,4662.7407,1400.2104,1205.4481,2353.6792,4112.077,5,10,8,12,10,6,7,13,10,Carbamidomethylation; Oxidation (M),20824.783,Ras-related protein Rap-1b OS=Homo sapiens OX=9606 GN=RAP1B PE=1 SV=1
275,TRUE,P63244	RACK1_HUMAN,258.28424,14,17458.96,11696.2705,6862.701,11752.118,28304.582,31093.924,31211.043,42454.918,14,18,19,15,22,19,18,26,20,Oxidation (M); Carbamidomethylation,35076.723,Receptor of activated protein C kinase 1 OS=Homo sapiens OX=9606 GN=RACK1 PE=1 SV=3
160,TRUE,Q14C86	GAPD1_HUMAN,282.7234,21,500.35257,292.2022,603.47906,1459.5082,5508.1426,6222.734,7765.1733,13345.117,21,4,2,3,10,23,17,31,27,Oxidation (M); Carbamidomethylation,164979.86,GTPase-activating protein and VPS9 domain-containing protein 1 OS=Homo sapiens OX=9606 GN=GAPVD1 PE=1 SV=2
138,TRUE,Q9Y5Y6	ST14_HUMAN,353.23505,26,292901.66,202520.78,120955.12,196304.84,169273.5,185967.06,248789.42,283741.47,26,93,76,65,70,82,69,77,82,Carbamidomethylation; Oxidation (M),94769.73,Suppressor of tumorigenicity 14 protein OS=Homo sapiens OX=9606 GN=ST14 PE=1 SV=2
732,TRUE,O94804	STK10_HUMAN,146.56223,4,,,,,,,552.3489,581.79315,4,,,,,3,3,3,4,,112135.234,Serine/threonine-protein kinase 10 OS=Homo sapiens OX=9606 GN=STK10 PE=1 SV=1
123,TRUE,Q8TDM6	DLG5_HUMAN,247.33484,29,920.86945,449.40646,,229.29782,4217.9175,4031.9243,3719.6006,6732.2026,28,12,7,4,7,22,19,23,27,Oxidation (M),213867.6,Disks large homolog 5 OS=Homo sapiens OX=9606 GN=DLG5 PE=1 SV=4
711,TRUE,P49768	PSN1_HUMAN,116.15647,3,625.1123,265.93777,,,,,,,3,5,4,1,1,2,,,,Oxidation (M),52667.836,Presenilin-1 OS=Homo sapiens OX=9606 GN=PSEN1 PE=1 SV=1
353,TRUE,Q99816	TS101_HUMAN,217.44661,11,621.9274,531.36475,1092.431,2509.629,5253.1587,4256.687,6203.665,8864.975,11,6,3,5,11,13,14,15,20,Oxidation (M),43944.316,Tumor susceptibility gene 101 protein OS=Homo sapiens OX=9606 GN=TSG101 PE=1 SV=2
122,TRUE,Q9UJS0	CMC2_HUMAN,349.15833,28,60393.977,42936.695,26858.875,57611.938,26277.719,26832.178,36753.93,48887.367,28,65,53,58,63,42,52,46,42,Carbamidomethylation; Oxidation (M),74175.58,Calcium-binding mitochondrial carrier protein Aralar2 OS=Homo sapiens OX=9606 GN=SLC25A13 PE=1 SV=2
821,TRUE,Q6IQ49	SDE2_HUMAN,106.77458,3,,,,,,,288.06796,322.09286,3,,,,2,,,5,1,,49741.965,Replication stress response regulator SDE2 OS=Homo sapiens OX=9606 GN=SDE2 PE=1 SV=1
428,TRUE,P09497	CLCB_HUMAN,142.00787,10,1926.5421,3199.193,834.6781,3352.42,247.50629,253.86636,6444.727,7426.1055,9,10,11,8,9,4,4,4,3,Carbamidomethylation,25190.488,Clathrin light chain B OS=Homo sapiens OX=9606 GN=CLTB PE=1 SV=1
83,TRUE,P0DMV8	HS71A_HUMAN,369.22928,35,29554.66,21149.662,19740.459,27999.37,37474.938,32765.516,32158.611,41241.875,13,71,56,61,73,86,70,79,84,Carbamidomethylation; Oxidation (M),70052.23,Heat shock 70 kDa protein 1A OS=Homo sapiens OX=9606 GN=HSPA1A PE=1 SV=1
558,TRUE,P01893	HLAH_HUMAN,246.35898,7,948.2674,658.7357,438.25586,543.86304,,,546.9919,,2,12,9,8,12,9,11,9,10,Acetylation (N-term); Carbamidomethylation,40891.88,"Putative HLA class I histocompatibility antigen, alpha chain H OS=Homo sapiens OX=9606 GN=HLA-H PE=5 SV=3"
507,TRUE,P11233	RALA_HUMAN,193.88208,7,4231.698,3685.01,2031.5901,4409.4463,171.22362,159.70674,385.8733,734.23926,4,15,14,11,13,7,4,8,6,Oxidation (M),23566.79,Ras-related protein Ral-A OS=Homo sapiens OX=9606 GN=RALA PE=1 SV=1
751,TRUE,O60645	EXOC3_HUMAN,123.08602,4,,,,,536.261,310.0345,1803.0374,988.3022,4,1,1,,,2,2,5,6,,85567.42,Exocyst complex component 3 OS=Homo sapiens OX=9606 GN=EXOC3 PE=1 SV=3
268,TRUE,P51148	RAB5C_HUMAN,257.75507,10,43892.11,25745.477,16533.7,27673.23,7717.8613,10826.2295,17388.797,21294.762,7,37,29,23,43,38,24,27,25,Oxidation (M),23482.553,Ras-related protein Rab-5C OS=Homo sapiens OX=9606 GN=RAB5C PE=1 SV=2
473,TRUE,P01111	RASN_HUMAN,195.2499,9,2100.7588,1059.0972,296.37604,1314.0269,726.2624,935.9584,1464.23,1869.4707,3,8,10,9,16,7,9,13,8,,21229.162,GTPase NRas OS=Homo sapiens OX=9606 GN=NRAS PE=1 SV=1
452,TRUE,O95197	RTN3_HUMAN,178.43207,9,23233.145,15983.791,6829.9126,21671.62,13392.352,14867.354,17697.236,22541.791,9,9,7,9,9,6,8,8,8,,112611.05,Reticulon-3 OS=Homo sapiens OX=9606 GN=RTN3 PE=1 SV=2
70,TRUE,P26006	ITA3_HUMAN,385.23676,32,208644.31,131821.61,91990.74,175095.44,155135.4,176204.17,240417.62,283038.03,32,96,81,70,100,95,89,109,118,Carbamidomethylation; Oxidation (M),116612.234,Integrin alpha-3 OS=Homo sapiens OX=9606 GN=ITGA3 PE=1 SV=5
531,TRUE,P06213	INSR_HUMAN,150.44353,7,,,,,,,,188395.58,2,4,5,2,4,3,5,7,7,Oxidation (M),156332.86,Insulin receptor OS=Homo sapiens OX=9606 GN=INSR PE=1 SV=4
871,TRUE,O43150	ASAP2_HUMAN,96.527115,3,,,,,,,,500.63153,2,,,1,1,,2,,4,,111650.57,"Arf-GAP with SH3 domain, ANK repeat and PH domain-containing protein 2 OS=Homo sapiens OX=9606 GN=ASAP2 PE=1 SV=3"
96,TRUE,O60449	LY75_HUMAN,372.62497,33,62366.02,59931.04,19871.836,45435.805,32663.928,36069.285,48369.113,56854.348,33,70,68,42,61,52,49,59,53,Carbamidomethylation; Oxidation (M),198311.31,Lymphocyte antigen 75 OS=Homo sapiens OX=9606 GN=LY75 PE=1 SV=3
63,TRUE,P35908	K22E_HUMAN,390.8619,41,114383.21,91557.37,33295.86,59908.816,33349.902,38571.37,144968.14,162068.55,28,148,141,65,98,84,80,140,132,Oxidation (M); Carbamidomethylation,65432.883,"Keratin, type II cytoskeletal 2 epidermal OS=Homo sapiens OX=9606 GN=KRT2 PE=1 SV=2"
434,TRUE,P07947	YES_HUMAN,217.70901,10,936.42303,,,497.95184,154.32904,263.64285,1140.8911,,5,12,13,8,10,10,13,17,10,,60801.23,Tyrosine-protein kinase Yes OS=Homo sapiens OX=9606 GN=YES1 PE=1 SV=3
41,FALSE,P50993	AT1A2_HUMAN,296.0217,13,80856.67,64082.598,38786.98,60946.598,66583.15,97702.81,24254.877,79057.63,6,44,39,43,46,40,33,36,37,Carbamidomethylation; Oxidation (M),112265.44,Sodium/potassium-transporting ATPase subunit alpha-2 OS=Homo sapiens OX=9606 GN=ATP1A2 PE=1 SV=1
600,TRUE,Q9NV70	EXOC1_HUMAN,118.54858,5,,,,,709.5751,,143.20317,5419.0547,5,,,,,4,1,3,4,Oxidation (M),101981.53,Exocyst complex component 1 OS=Homo sapiens OX=9606 GN=EXOC1 PE=1 SV=4
535,TRUE,P06703	S10A6_HUMAN,187.18343,6,14904.503,12133.053,15401.688,19662.043,49374.75,38972.06,45513.7,53346.36,6,4,6,6,11,13,11,17,17,Acetylation (N-term); Carbamidomethylation; Oxidation (M),10179.734,Protein S100-A6 OS=Homo sapiens OX=9606 GN=S100A6 PE=1 SV=1
903,TRUE,O00421	CCRL2_HUMAN,88.41774,2,2247.8916,1339.2279,830.5129,1522.2662,1179.6683,1268.7687,2049.2363,2856.7742,2,1,1,2,1,1,1,1,2,,39513.38,C-C chemokine receptor-like 2 OS=Homo sapiens OX=9606 GN=CCRL2 PE=1 SV=2
583,TRUE,O15498	YKT6_HUMAN,181.6185,7,,,473.15094,1415.501,,,796.7897,1159.9949,7,1,1,7,9,,1,10,6,,22417.576,Synaptobrevin homolog YKT6 OS=Homo sapiens OX=9606 GN=YKT6 PE=1 SV=1
349,TRUE,Q99569	PKP4_HUMAN,209.87576,13,24489.977,433.22925,,6185.049,348.95523,14122.133,995.536,2168.347,13,7,9,2,4,5,9,9,11,,131868.3,Plakophilin-4 OS=Homo sapiens OX=9606 GN=PKP4 PE=1 SV=2
305,TRUE,Q9H7D0	DOCK5_HUMAN,213.90025,13,,,,,,871.5989,630.5946,2159.476,13,1,1,,,3,4,9,11,Oxidation (M),215308.73,Dedicator of cytokinesis protein 5 OS=Homo sapiens OX=9606 GN=DOCK5 PE=1 SV=3
480,TRUE,Q92896	GSLG1_HUMAN,192.63191,8,1864.0532,1021.7599,497.70346,1465.5022,1262.3118,1258.0422,2604.9824,2202.9,8,9,6,5,10,6,13,9,8,Oxidation (M),134551.84,Golgi apparatus protein 1 OS=Homo sapiens OX=9606 GN=GLG1 PE=1 SV=2
451,TRUE,Q9NZW5	MPP6_HUMAN,177.04065,8,462.7521,54.862587,,415.51846,842.569,933.75256,1395.1533,1839.9517,8,4,2,,4,5,9,8,8,Oxidation (M),61117.004,MAGUK p55 subfamily member 6 OS=Homo sapiens OX=9606 GN=MPP6 PE=1 SV=2
226,TRUE,Q9NXE4	NSMA3_HUMAN,243.18666,17,14737.635,814.95996,74.63354,1699.2855,1732.0903,2247.109,2797.3228,6773.2075,17,13,8,5,11,12,12,16,21,Acetylation (N-term); Oxidation (M),97809.92,Sphingomyelin phosphodiesterase 4 OS=Homo sapiens OX=9606 GN=SMPD4 PE=1 SV=3
156,TRUE,Q9BQ39	DDX50_HUMAN,299.20764,24,15563.487,12306.448,10864.848,18903.44,12178.752,14280.695,25742.492,25104.377,24,23,18,24,25,19,26,35,36,Acetylation (N-term); Oxidation (M),82565.016,ATP-dependent RNA helicase DDX50 OS=Homo sapiens OX=9606 GN=DDX50 PE=1 SV=1
22,TRUE,Q07157	ZO1_HUMAN,422.5339,66,31203.822,19965.705,10432.331,24013.41,26289.482,32088.01,42362.555,56452.33,65,70,69,52,66,87,83,99,105,Acetylation (N-term); Oxidation (M),195459.03,Tight junction protein ZO-1 OS=Homo sapiens OX=9606 GN=TJP1 PE=1 SV=3
350,TRUE,O15530	PDPK1_HUMAN,198.86627,13,955.55524,,,836.3756,1444.4014,2468.0327,3468.766,3748.2468,13,3,2,,10,14,12,12,10,Oxidation (M),63151.848,3-phosphoinositide-dependent protein kinase 1 OS=Homo sapiens OX=9606 GN=PDPK1 PE=1 SV=1
144,TRUE,Q12913	PTPRJ_HUMAN,337.69498,26,12011.892,8622.7705,4241.8696,7555.0605,12356.615,12346.964,17027.613,21483.451,26,33,33,30,29,38,39,44,39,Oxidation (M),145941.48,Receptor-type tyrosine-protein phosphatase eta OS=Homo sapiens OX=9606 GN=PTPRJ PE=1 SV=3
321,FALSE,Q13191	CBLB_HUMAN,100.10835,3,,,,,701.817,880.874,2313.9888,1540.2134,3,,2,4,,3,3,5,5,,109449.73,E3 ubiquitin-protein ligase CBL-B OS=Homo sapiens OX=9606 GN=CBLB PE=1 SV=2
170,TRUE,Q16625	OCLN_HUMAN,334.54453,19,196946.78,136985.34,70199.4,120445.516,136357.86,148172.03,180857.02,219710.97,19,84,68,56,76,68,65,75,75,Oxidation (M),59143.785,Occludin OS=Homo sapiens OX=9606 GN=OCLN PE=1 SV=1
265,FALSE,P23469	PTPRE_HUMAN,71.969475,2,,222.62962,,,,,125.85469,,2,,1,,,,,3,2,,80641.69,Receptor-type tyrosine-protein phosphatase epsilon OS=Homo sapiens OX=9606 GN=PTPRE PE=1 SV=1
584,TRUE,O60488	ACSL4_HUMAN,180.60075,6,,,,,,,,,3,12,8,5,7,4,5,7,9,Oxidation (M),79188.04,Long-chain-fatty-acid--CoA ligase 4 OS=Homo sapiens OX=9606 GN=ACSL4 PE=1 SV=2
641,TRUE,O95716	RAB3D_HUMAN,156.43042,5,413.62,149.64612,55.613583,156.83139,,,185.97115,443.24692,3,13,13,13,13,5,8,11,11,Oxidation (M),24267.14,Ras-related protein Rab-3D OS=Homo sapiens OX=9606 GN=RAB3D PE=1 SV=1
516,TRUE,Q07864	DPOE1_HUMAN,134.00246,8,,,,,,,,2635.5293,8,,,,,,1,,12,,261517.89,DNA polymerase epsilon catalytic subunit A OS=Homo sapiens OX=9606 GN=POLE PE=1 SV=5
119,FALSE,Q9Y2J2	E41L3_HUMAN,85.91212,2,,,,,,,,,2,2,1,3,2,2,1,2,4,,120677.625,Band 4.1-like protein 3 OS=Homo sapiens OX=9606 GN=EPB41L3 PE=1 SV=2
523,TRUE,Q5VZK9	CARL1_HUMAN,187.77415,8,,,,,579.2414,312.51126,112.2545,1751.0967,8,2,,,3,6,9,6,10,,151556.8,F-actin-uncapping protein LRRC16A OS=Homo sapiens OX=9606 GN=CARMIL1 PE=1 SV=1
104,TRUE,P11021	BIP_HUMAN,369.80588,31,56439,30883.092,22554.078,45248.242,39086.242,41978.86,46616.254,50551.97,28,79,65,69,79,67,70,74,72,Oxidation (M); Carbamidomethylation,72332.95,Endoplasmic reticulum chaperone BiP OS=Homo sapiens OX=9606 GN=HSPA5 PE=1 SV=2
998,TRUE,Q96GX5	GWL_HUMAN,68.821304,2,,,,180.37726,472.51617,398.6289,587.37714,982.67346,2,,,2,1,5,1,1,1,,97319.01,Serine/threonine-protein kinase greatwall OS=Homo sapiens OX=9606 GN=MASTL PE=1 SV=1
322,TRUE,P11274	BCR_HUMAN,197.18993,12,,517.2986,,1054.8955,1513.5686,1816.8843,2169.6753,2595.283,10,2,3,4,6,7,11,10,13,Oxidation (M),142819.34,Breakpoint cluster region protein OS=Homo sapiens OX=9606 GN=BCR PE=1 SV=2
1005,TRUE,P30043	BLVRB_HUMAN,89.94312,2,,,,,233.03511,,,,2,,,,,3,,,,,22119.344,Flavin reductase (NADPH) OS=Homo sapiens OX=9606 GN=BLVRB PE=1 SV=3
130,TRUE,P18206	VINC_HUMAN,286.35086,27,,,745.3132,4276.3926,257.54846,,4918.3857,6983.492,27,,,12,29,5,6,30,22,Oxidation (M),123799.3,Vinculin OS=Homo sapiens OX=9606 GN=VCL PE=1 SV=4
35,TRUE,P04264	K2C1_HUMAN,410.2609,55,1364419.6,1060154.9,185802.5,292230.06,407198.25,442320.25,603085,692612.7,43,320,274,126,187,180,179,203,232,Oxidation (M); Carbamidomethylation,66038.73,"Keratin, type II cytoskeletal 1 OS=Homo sapiens OX=9606 GN=KRT1 PE=1 SV=6"
562,TRUE,Q8IZT6	ASPM_HUMAN,125.00948,7,6883.432,2285.8928,,2336.1235,1044.2123,2671.5164,13296.172,18303.453,7,1,1,,2,3,4,7,4,Acetylation (N-term),409800.06,Abnormal spindle-like microcephaly-associated protein OS=Homo sapiens OX=9606 GN=ASPM PE=1 SV=2
635,TRUE,Q9Y5X3	SNX5_HUMAN,148.20044,6,,,112.28914,403.9201,822.10156,898.1776,1280.188,1919.7472,6,,,1,2,6,3,6,7,Acetylation (N-term),46816.49,Sorting nexin-5 OS=Homo sapiens OX=9606 GN=SNX5 PE=1 SV=1
918,TRUE,Q6IMN6	CAPR2_HUMAN,64.82194,2,,,,5177.6494,4376.7847,,,92.67987,2,,,,1,2,,,1,,125924.85,Caprin-2 OS=Homo sapiens OX=9606 GN=CAPRIN2 PE=1 SV=1
145,TRUE,O15294	OGT1_HUMAN,274.72696,23,2799.8315,1282.9534,395.55566,1891.5621,4867.597,7454.6226,10169.459,8848.639,23,13,11,11,16,21,22,26,31,Acetylation (N-term); Oxidation (M),116924.6,UDP-N-acetylglucosamine--peptide N-acetylglucosaminyltransferase 110 kDa subunit OS=Homo sapiens OX=9606 GN=OGT PE=1 SV=3
437,TRUE,P62136	PP1A_HUMAN,259.54593,10,599.9654,416.11908,481.0558,1336.7922,505.64932,796.23096,966.7993,921.26086,2,8,9,11,13,13,10,7,12,Carbamidomethylation,37512.074,Serine/threonine-protein phosphatase PP1-alpha catalytic subunit OS=Homo sapiens OX=9606 GN=PPP1CA PE=1 SV=1
705,FALSE,Q9Y5E9	PCDBE_HUMAN,89.42716,2,297.44473,,,176.94254,,,,520.02356,2,1,1,,1,,,,2,,87547.9,Protocadherin beta-14 OS=Homo sapiens OX=9606 GN=PCDHB14 PE=1 SV=1
278,TRUE,O75955	FLOT1_HUMAN,256.39432,15,3333.4998,1643.3075,652.4456,2300.863,241.12442,,105.210365,412.93378,15,16,13,13,15,5,3,4,8,Oxidation (M),47355.28,Flotillin-1 OS=Homo sapiens OX=9606 GN=FLOT1 PE=1 SV=3
1011,TRUE,Q9BSR8	YIPF4_HUMAN,71.4004,2,,2177.5063,1057.4209,2181.041,,,246.58464,294.92334,2,3,2,2,3,,,1,1,,27082.666,Protein YIPF4 OS=Homo sapiens OX=9606 GN=YIPF4 PE=1 SV=1
671,TRUE,P54278	PMS2_HUMAN,118.74696,5,203.77737,,,,,,81.30713,566.22003,5,1,,1,,1,,1,5,,95796.6,Mismatch repair endonuclease PMS2 OS=Homo sapiens OX=9606 GN=PMS2 PE=1 SV=2
540,TRUE,Q96B97	SH3K1_HUMAN,193.72456,8,171.01309,,281.52283,528.8291,1888.3508,1477.3696,2398.4668,3307.4172,8,1,,2,3,7,5,6,9,,73126.305,SH3 domain-containing kinase-binding protein 1 OS=Homo sapiens OX=9606 GN=SH3KBP1 PE=1 SV=2
62,FALSE,P35609	ACTN2_HUMAN,223.82587,9,18867.883,11793.488,8746.257,14229.652,15883.796,17134.445,21446.129,25232.95,8,13,12,14,17,13,19,19,20,Carbamidomethylation; Oxidation (M),103853.78,Alpha-actinin-2 OS=Homo sapiens OX=9606 GN=ACTN2 PE=1 SV=1
610,TRUE,O00400	ACATN_HUMAN,153.55681,6,954.7453,154.21973,,1304.4856,,,225.27524,213.51393,6,4,4,2,5,,,3,2,,60908.992,Acetyl-coenzyme A transporter 1 OS=Homo sapiens OX=9606 GN=SLC33A1 PE=1 SV=1
5,TRUE,Q01082	SPTB2_HUMAN,498.09705,115,148365.23,123817.75,53751.465,106402.625,21034.666,23694.293,33341.34,48338.758,106,244,235,181,245,95,113,118,137,Carbamidomethylation; Oxidation (M),274609.22,"Spectrin beta chain, non-erythrocytic 1 OS=Homo sapiens OX=9606 GN=SPTBN1 PE=1 SV=2"
316,TRUE,Q96CW1	AP2M1_HUMAN,236.6886,13,4211.505,2567.1873,1814.9788,3892.8418,1226.3375,1135.8744,2734.4138,4563.557,13,12,19,14,13,7,8,8,14,Carbamidomethylation; Oxidation (M),49654.676,AP-2 complex subunit mu OS=Homo sapiens OX=9606 GN=AP2M1 PE=1 SV=2
314,TRUE,P50281	MMP14_HUMAN,248.16458,11,6467.615,4787.155,1079.6716,5666.7007,3704.8718,4019.4814,10999.214,7486.885,10,14,10,8,10,9,13,17,16,Oxidation (M),65893.92,Matrix metalloproteinase-14 OS=Homo sapiens OX=9606 GN=MMP14 PE=1 SV=3
354,TRUE,Q04721	NOTC2_HUMAN,213.40479,9,1929.6943,975.0822,,820.25244,1305.4811,386.38458,1164.0887,1619.8628,9,6,4,2,3,7,7,7,10,Oxidation (M),265404.78,Neurogenic locus notch homolog protein 2 OS=Homo sapiens OX=9606 GN=NOTCH2 PE=1 SV=3
360,TRUE,Q16512	PKN1_HUMAN,221.00168,12,,,,508.80594,524.5724,872.5332,1937.9941,1038.1497,11,,,1,3,5,8,14,10,Oxidation (M),103932.14,Serine/threonine-protein kinase N1 OS=Homo sapiens OX=9606 GN=PKN1 PE=1 SV=2
757,TRUE,Q8NFT2	STEA2_HUMAN,102.46361,4,284.17706,259.31326,,206.50507,,,168.60117,,4,4,4,1,2,1,1,2,1,Oxidation (M),56055.574,Metalloreductase STEAP2 OS=Homo sapiens OX=9606 GN=STEAP2 PE=1 SV=3
914,TRUE,Q9UJM3	ERRFI_HUMAN,70.2547,2,,,,,,,,,2,,,,,1,1,1,2,,50560.043,ERBB receptor feedback inhibitor 1 OS=Homo sapiens OX=9606 GN=ERRFI1 PE=1 SV=1
820,TRUE,Q96NW4	ANR27_HUMAN,89.87327,3,4733.4854,,2753.2715,4230.182,,6966.56,6876.937,,3,2,,2,2,,2,4,,,116984.04,Ankyrin repeat domain-containing protein 27 OS=Homo sapiens OX=9606 GN=ANKRD27 PE=1 SV=2
822,TRUE,P51636	CAV2_HUMAN,135.65508,3,10463.679,7803.7476,5166.0254,7215.823,5067.133,5103.701,6537.9663,7625.5205,3,6,5,3,6,6,6,8,4,Carbamidomethylation,18291.182,Caveolin-2 OS=Homo sapiens OX=9606 GN=CAV2 PE=1 SV=2
62,TRUE,P12814	ACTN1_HUMAN,386.78494,39,67706.08,41530.418,31964.984,57015.023,50394.934,60078.71,80754.83,96417.71,38,60,37,46,59,52,64,79,80,Carbamidomethylation; Oxidation (M),103057.55,Alpha-actinin-1 OS=Homo sapiens OX=9606 GN=ACTN1 PE=1 SV=2
211,TRUE,Q13492	PICAL_HUMAN,300.86835,17,36832.98,4919.5435,20438.697,12551.704,4452.8315,6078.8545,27739.652,12469.296,17,20,21,20,25,18,23,21,16,Oxidation (M),70754.51,Phosphatidylinositol-binding clathrin assembly protein OS=Homo sapiens OX=9606 GN=PICALM PE=1 SV=2
893,TRUE,Q9Y2J4	AMOL2_HUMAN,108.36764,2,,,,,,,,,2,,,,1,1,4,2,2,,85764.41,Angiomotin-like protein 2 OS=Homo sapiens OX=9606 GN=AMOTL2 PE=1 SV=3
169,TRUE,P30153	2AAA_HUMAN,291.80203,20,2930.1997,1861.9298,2697.1614,7974.952,11649.811,14560.297,15066.116,22756.627,20,17,13,19,23,32,25,29,32,Carbamidomethylation; Oxidation (M),65308.582,Serine/threonine-protein phosphatase 2A 65 kDa regulatory subunit A alpha isoform OS=Homo sapiens OX=9606 GN=PPP2R1A PE=1 SV=4
286,TRUE,P61204	ARF3_HUMAN,246.80984,10,19990.09,18146.578,20332.37,36663.797,25857.809,29415.248,48490.383,40909.05,6,25,32,38,41,37,38,47,41,Oxidation (M),20600.76,ADP-ribosylation factor 3 OS=Homo sapiens OX=9606 GN=ARF3 PE=1 SV=2
266,TRUE,O95810	CAVN2_HUMAN,272.1845,14,16792.453,11335.026,4419.929,13581.105,14205.113,16503.592,22052.9,23685.232,14,26,24,16,27,25,29,23,25,Oxidation (M),47173.168,Caveolae-associated protein 2 OS=Homo sapiens OX=9606 GN=CAVIN2 PE=1 SV=3
970,TRUE,P23470	PTPRG_HUMAN,76.76277,2,107.32678,81.64136,,,,,,135.55185,2,1,2,,,,1,,1,,162003.47,Receptor-type tyrosine-protein phosphatase gamma OS=Homo sapiens OX=9606 GN=PTPRG PE=1 SV=4
135,TRUE,P50851	LRBA_HUMAN,282.34512,27,,,,80.01226,3412.5889,3499.9749,6682.047,8701.054,27,2,,2,4,20,24,30,29,Oxidation (M),319107.88,Lipopolysaccharide-responsive and beige-like anchor protein OS=Homo sapiens OX=9606 GN=LRBA PE=1 SV=4
525,TRUE,P54760	EPHB4_HUMAN,220.79489,8,,,,,,,,191.3982,3,11,9,7,11,13,8,14,13,Carbamidomethylation,108270.19,Ephrin type-B receptor 4 OS=Homo sapiens OX=9606 GN=EPHB4 PE=1 SV=2
934,TRUE,P49795	RGS19_HUMAN,53.602222,2,,,,,,,,,2,,,,,,,,2,,24635.64,Regulator of G-protein signaling 19 OS=Homo sapiens OX=9606 GN=RGS19 PE=1 SV=1
481,TRUE,Q9BRQ8	FSP1_HUMAN,197.8065,8,272.89194,164.90204,,897.3475,,,859.02673,1294.0922,8,2,1,2,9,,1,8,7,Oxidation (M),40526.695,Ferroptosis suppressor protein 1 OS=Homo sapiens OX=9606 GN=AIFM2 PE=1 SV=1
705,TRUE,Q9UN66	PCDB8_HUMAN,123.89643,4,437.66748,,,176.94254,,,,520.02356,4,2,1,,2,,1,,3,,87590.73,Protocadherin beta-8 OS=Homo sapiens OX=9606 GN=PCDHB8 PE=2 SV=4
274,TRUE,P51149	RAB7A_HUMAN,274.26108,13,181215.6,119635.2,90312.84,130806.63,26131.227,22613.402,36525.785,56796.113,13,61,53,49,54,27,21,33,29,Oxidation (M); Carbamidomethylation,23489.742,Ras-related protein Rab-7a OS=Homo sapiens OX=9606 GN=RAB7A PE=1 SV=1
784,TRUE,Q13564	ULA1_HUMAN,133.95792,3,,,,,250.36488,154.73415,308.82263,529.04297,3,1,,,1,3,4,4,3,,60246.348,NEDD8-activating enzyme E1 regulatory subunit OS=Homo sapiens OX=9606 GN=NAE1 PE=1 SV=1
708,TRUE,Q9UBT7	CTNL1_HUMAN,86.951584,4,36392.87,22769.568,18664.701,31565.268,35311.113,27478.168,33193.34,40930.742,4,3,1,2,3,3,1,5,3,Acetylation (N-term),81896.39,Alpha-catulin OS=Homo sapiens OX=9606 GN=CTNNAL1 PE=1 SV=2
462,TRUE,Q9P2M7	CING_HUMAN,164.57428,9,539.29755,211.80966,,241.47298,,,300.2318,202.68954,9,6,1,1,5,,2,4,4,,136385.92,Cingulin OS=Homo sapiens OX=9606 GN=CGN PE=1 SV=2
694,TRUE,Q9P266	JCAD_HUMAN,121.62865,5,,,,,,,96.358536,251.45508,5,,,,,2,1,5,8,,148350.8,Junctional protein associated with coronary artery disease OS=Homo sapiens OX=9606 GN=JCAD PE=1 SV=3
69,TRUE,Q9NZB2	F120A_HUMAN,398.88614,39,28946.03,18518.754,17436.344,32341.125,63284.69,71726,84109.195,100872.04,39,63,43,43,66,89,95,103,92,Carbamidomethylation; Oxidation (M),121887.69,Constitutive coactivator of PPAR-gamma-like protein 1 OS=Homo sapiens OX=9606 GN=FAM120A PE=1 SV=2
147,TRUE,Q12959	DLG1_HUMAN,289.77682,26,7007.5386,3259.232,2188.2922,5239.736,4325.6167,3711.7085,5611.1494,5379.944,26,26,21,12,28,17,15,20,20,Oxidation (M); Carbamidomethylation,100455.016,Disks large homolog 1 OS=Homo sapiens OX=9606 GN=DLG1 PE=1 SV=2
191,TRUE,P16070	CD44_HUMAN,324.44577,19,495804.5,365414.5,266205.28,409127.84,399748.62,435837.5,577833.8,696573.44,19,79,81,64,82,91,84,95,109,Carbamidomethylation; Oxidation (M),81537.62,CD44 antigen OS=Homo sapiens OX=9606 GN=CD44 PE=1 SV=3
942,TRUE,Q9NXR1	NDE1_HUMAN,104.92035,2,,,,,,,,554.54565,2,,,,1,2,3,2,2,,37720.56,Nuclear distribution protein nudE homolog 1 OS=Homo sapiens OX=9606 GN=NDE1 PE=1 SV=3
249,TRUE,Q14517	FAT1_HUMAN,219.27354,16,2238.898,221.38559,,347.8898,,72.61954,,1371.0693,16,15,8,,9,1,6,8,10,Oxidation (M),506272.75,Protocadherin Fat 1 OS=Homo sapiens OX=9606 GN=FAT1 PE=1 SV=2
404,TRUE,O00560	SDCB1_HUMAN,206.12794,8,3328.5586,2472.755,650.0243,1348.9368,2983.9795,3215.7656,3705.383,5437.105,8,10,12,12,10,9,11,12,14,Carbamidomethylation; Oxidation (M),32444.385,Syntenin-1 OS=Homo sapiens OX=9606 GN=SDCBP PE=1 SV=1
849,TRUE,Q9H6S3	ES8L2_HUMAN,91.713486,3,,,,,93.606766,,,,3,,,,1,2,,1,3,,80620.61,Epidermal growth factor receptor kinase substrate 8-like protein 2 OS=Homo sapiens OX=9606 GN=EPS8L2 PE=1 SV=2
327,TRUE,Q86X29	LSR_HUMAN,235.5407,12,13198.429,8093.609,4383.093,8723.373,8512.297,9536.113,14370.743,15349.067,12,20,24,18,21,18,16,25,30,Oxidation (M),71438.875,Lipolysis-stimulated lipoprotein receptor OS=Homo sapiens OX=9606 GN=LSR PE=1 SV=4
705,FALSE,Q9Y5E8	PCDBF_HUMAN,105.98369,3,297.44473,,,176.94254,,,,520.02356,3,1,1,,1,,,,3,,86329.305,Protocadherin beta-15 OS=Homo sapiens OX=9606 GN=PCDHB15 PE=2 SV=1
789,TRUE,O14939	PLD2_HUMAN,112.61012,3,,,,83.98644,,,,332.5189,3,1,1,,2,1,,3,3,,105987.11,Phospholipase D2 OS=Homo sapiens OX=9606 GN=PLD2 PE=1 SV=2
987,TRUE,O60669	MOT2_HUMAN,54.7006,2,,,,,,,,,2,,,,,1,,,1,,52200.242,Monocarboxylate transporter 2 OS=Homo sapiens OX=9606 GN=SLC16A7 PE=1 SV=2
868,TRUE,Q96SB3	NEB2_HUMAN,107.263885,3,294.89545,,,,,,,,3,2,1,,1,1,1,1,2,,89334.22,Neurabin-2 OS=Homo sapiens OX=9606 GN=PPP1R9B PE=1 SV=3
285,TRUE,P54753	EPHB3_HUMAN,267.8475,14,1225.7847,84.429886,142.79549,607.2269,569.5225,449.79837,1023.0205,1111.8845,6,18,16,9,14,18,13,20,19,Carbamidomethylation; Oxidation (M),110329.88,Ephrin type-B receptor 3 OS=Homo sapiens OX=9606 GN=EPHB3 PE=1 SV=2
959,TRUE,Q5W0Z9	ZDH20_HUMAN,83.08313,2,,,,,,,,,2,,,,,1,,1,,Oxidation (M),42277.59,Palmitoyltransferase ZDHHC20 OS=Homo sapiens OX=9606 GN=ZDHHC20 PE=1 SV=1
990,TRUE,O75712	CXB3_HUMAN,124.23136,2,287.94476,341.04514,171.42633,,643.1189,716.8258,1018.8271,1087.8064,2,2,2,1,3,2,2,4,7,,30817.998,Gap junction beta-3 protein OS=Homo sapiens OX=9606 GN=GJB3 PE=1 SV=1
795,TRUE,Q7L5N7	PCAT2_HUMAN,97.55232,3,,,,,,,,605.38135,3,1,,,1,,1,,1,,60207.863,Lysophosphatidylcholine acyltransferase 2 OS=Homo sapiens OX=9606 GN=LPCAT2 PE=1 SV=1
874,TRUE,P55082	MFAP3_HUMAN,87.59555,3,,,,,571.1385,568.28625,,177.17772,3,1,1,2,,1,2,2,2,,40165.35,Microfibril-associated glycoprotein 3 OS=Homo sapiens OX=9606 GN=MFAP3 PE=1 SV=1
30,TRUE,P21589	5NTD_HUMAN,516.7187,55,1273219.6,1001081.75,822536,1292142.8,1013200.25,1012424.4,1392011.4,1367327.5,55,260,252,240,287,257,253,288,285,Acetylation (N-term); Oxidation (M); Carbamidomethylation,63367.742,5'-nucleotidase OS=Homo sapiens OX=9606 GN=NT5E PE=1 SV=1
809,TRUE,Q96GC9	VMP1_HUMAN,114.65441,3,4576.593,3176.4072,1719.1191,3347.057,1397.9819,1535.445,1979.5474,2650.2192,3,3,4,3,5,4,1,3,3,,46237.67,Vacuole membrane protein 1 OS=Homo sapiens OX=9606 GN=VMP1 PE=1 SV=1
337,TRUE,Q9BR76	COR1B_HUMAN,246.65076,11,6125.226,3543.8818,1177.7811,4724.1074,5642.2744,6653.511,9985.911,10157.917,10,16,11,6,11,14,15,22,19,Oxidation (M); Carbamidomethylation,54234.65,Coronin-1B OS=Homo sapiens OX=9606 GN=CORO1B PE=1 SV=1
580,TRUE,Q6IA17	SIGIR_HUMAN,182.95743,7,7040.7397,4947.7856,2589.7363,3757.5015,2311.4976,4530.0654,2612.7407,7136.926,7,13,11,8,10,9,10,9,12,,45679.18,Single Ig IL-1-related receptor OS=Homo sapiens OX=9606 GN=SIGIRR PE=1 SV=3
50,TRUE,P08195	4F2_HUMAN,448.11148,46,993689.94,750180.25,602132.8,923317.75,780340.4,830343.7,884426.06,1075908.1,46,190,176,184,209,194,191,214,205,Oxidation (M); Acetylation (N-term); Carbamidomethylation,67994,4F2 cell-surface antigen heavy chain OS=Homo sapiens OX=9606 GN=SLC3A2 PE=1 SV=3
32,TRUE,P08727	K1C19_HUMAN,439.3129,53,1668720,1311201.1,797406.3,1194467.6,1049604.8,1104913.9,1316023.1,1524672.4,49,290,261,224,223,229,241,242,278,Oxidation (M),44105.992,"Keratin, type I cytoskeletal 19 OS=Homo sapiens OX=9606 GN=KRT19 PE=1 SV=4"
534,TRUE,Q9H0U3	MAGT1_HUMAN,182.74037,6,6787.59,4816.804,2917.385,5915.6836,927.3511,1158.6912,1991.9873,8490.905,6,5,9,8,9,4,5,7,5,Oxidation (M),38036.625,Magnesium transporter protein 1 OS=Homo sapiens OX=9606 GN=MAGT1 PE=1 SV=1
332,TRUE,O00443	P3C2A_HUMAN,195.7136,13,,,,,,,479.45435,1075.1415,13,1,1,1,2,3,3,7,11,Oxidation (M),190679.56,Phosphatidylinositol 4-phosphate 3-kinase C2 domain-containing subunit alpha OS=Homo sapiens OX=9606 GN=PIK3C2A PE=1 SV=2
465,TRUE,P18615	NELFE_HUMAN,229.38873,8,354.295,175.18956,201.65262,497.90094,460.60153,765.6185,1156.7347,1390.2261,8,3,4,3,7,5,6,4,5,Oxidation (M),43239.797,Negative elongation factor E OS=Homo sapiens OX=9606 GN=NELFE PE=1 SV=3
759,FALSE,P62070	RRAS2_HUMAN,123.73125,2,594.6859,499.10767,92.20938,689.5622,,,250.47504,253.92006,2,4,3,2,3,,,1,2,Oxidation (M),23399.564,Ras-related protein R-Ras2 OS=Homo sapiens OX=9606 GN=RRAS2 PE=1 SV=1
471,TRUE,P29353	SHC1_HUMAN,203.02257,8,216.67374,,,375.9969,1988.192,2261.0825,5285.592,5578.7837,8,3,4,6,6,6,9,14,10,Oxidation (M),62822.098,SHC-transforming protein 1 OS=Homo sapiens OX=9606 GN=SHC1 PE=1 SV=4
113,TRUE,P07237	PDIA1_HUMAN,336.2478,30,24157.018,14280.834,10957.178,24920.232,46002.76,54709.79,58722.68,77654.69,30,42,37,39,46,49,50,64,62,Oxidation (M),57116.363,Protein disulfide-isomerase OS=Homo sapiens OX=9606 GN=P4HB PE=1 SV=3
445,TRUE,P52789	HXK2_HUMAN,188.7293,10,,,87.275955,338.3374,233.95792,79.076904,1633.5941,3323.19,10,,,1,3,2,1,6,15,,102379.8,Hexokinase-2 OS=Homo sapiens OX=9606 GN=HK2 PE=1 SV=2
431,TRUE,Q9P289	STK26_HUMAN,195.7808,10,628.9612,275.27072,447.6251,1956.0769,2751.0007,2099.4119,5026.1973,4744.3745,10,1,2,7,6,7,8,13,12,,46528.812,Serine/threonine-protein kinase 26 OS=Homo sapiens OX=9606 GN=STK26 PE=1 SV=2
936,TRUE,Q9HCL2	GPAT1_HUMAN,82.77371,2,,,,,,,,,2,3,2,,3,,1,1,3,,93794.82,"Glycerol-3-phosphate acyltransferase 1, mitochondrial OS=Homo sapiens OX=9606 GN=GPAM PE=1 SV=3"
80,TRUE,Q14571	ITPR2_HUMAN,328.70438,38,3773.9177,952.22986,189.40189,1058.3108,1572.6198,1921.2178,4068.9392,5838.1763,30,37,28,19,26,31,30,37,39,Oxidation (M),308063.66,"Inositol 1,4,5-trisphosphate receptor type 2 OS=Homo sapiens OX=9606 GN=ITPR2 PE=1 SV=2"
834,TRUE,P35052	GPC1_HUMAN,68.18382,2,132.74408,,,,,,331.61154,186.15674,2,1,1,,,,,2,1,Oxidation (M),61680.223,Glypican-1 OS=Homo sapiens OX=9606 GN=GPC1 PE=1 SV=2
388,TRUE,P50552	VASP_HUMAN,180.84607,9,,,,,546.20056,425.74725,1193.4851,1796.8934,9,,,2,2,7,11,10,10,Oxidation (M),39829.723,Vasodilator-stimulated phosphoprotein OS=Homo sapiens OX=9606 GN=VASP PE=1 SV=3
889,TRUE,P40818	UBP8_HUMAN,78.61151,2,,,,,,,,,2,2,3,1,6,2,4,4,4,,127523.22,Ubiquitin carboxyl-terminal hydrolase 8 OS=Homo sapiens OX=9606 GN=USP8 PE=1 SV=1
294,TRUE,P08754	GNAI3_HUMAN,280.02832,13,8841.833,6264.055,4285.877,7914.3115,2132.994,2603.6646,5480.7603,2854.4746,6,33,36,27,36,23,26,23,26,Carbamidomethylation; Oxidation (M),40532.188,Guanine nucleotide-binding protein G(i) subunit alpha OS=Homo sapiens OX=9606 GN=GNAI3 PE=1 SV=3
187,TRUE,P06576	ATPB_HUMAN,284.20227,15,3727.3464,1424.7903,305.0086,794.10956,5348.5034,4072.0999,5238.8896,4599.4053,15,15,13,8,12,24,22,22,19,Oxidation (M),56559.9,"ATP synthase subunit beta, mitochondrial OS=Homo sapiens OX=9606 GN=ATP5F1B PE=1 SV=3"
41,TRUE,P05023	AT1A1_HUMAN,409.5404,46,187694.45,150671.67,108274.08,173871.84,131613.33,172959.1,110180.875,172560.08,38,134,119,123,123,104,104,111,116,Carbamidomethylation; Oxidation (M),112896.09,Sodium/potassium-transporting ATPase subunit alpha-1 OS=Homo sapiens OX=9606 GN=ATP1A1 PE=1 SV=1
58,TRUE,P07900	HS90A_HUMAN,414.93427,40,34584.062,14242.988,33942.496,60590.836,67751.664,66146.42,120164.08,137457.72,22,89,80,111,123,152,147,188,169,Oxidation (M); Carbamidomethylation,84659.71,Heat shock protein HSP 90-alpha OS=Homo sapiens OX=9606 GN=HSP90AA1 PE=1 SV=5
184,FALSE,Q15303	ERBB4_HUMAN,114.79342,3,2019.0719,1439.4708,473.62204,1792.1519,1794.8733,1585.8768,1380.8789,3036.447,2,8,8,9,7,6,4,7,7,,146808.1,Receptor tyrosine-protein kinase erbB-4 OS=Homo sapiens OX=9606 GN=ERBB4 PE=1 SV=1
630,TRUE,Q9Y487	VPP2_HUMAN,144.71712,6,115.62105,,,239.2265,,,378.0647,128.0037,5,6,1,5,7,2,2,5,2,,98082.32,V-type proton ATPase 116 kDa subunit a2 OS=Homo sapiens OX=9606 GN=ATP6V0A2 PE=1 SV=2
803,TRUE,P23743	DGKA_HUMAN,89.527275,3,,,,,,,497.2071,261.29694,3,1,,,1,,1,4,2,,82630.21,Diacylglycerol kinase alpha OS=Homo sapiens OX=9606 GN=DGKA PE=1 SV=3
718,TRUE,O14763	TR10B_HUMAN,161.13434,4,326.33176,,99.278366,118.33961,,237.04866,1046.4594,452.4457,4,3,3,3,6,1,3,4,6,,47878.3,Tumor necrosis factor receptor superfamily member 10B OS=Homo sapiens OX=9606 GN=TNFRSF10B PE=1 SV=2
236,TRUE,Q13033	STRN3_HUMAN,264.9943,17,2632.311,1121.5095,675.7097,2374.74,1064.6022,2496.2776,4021.0388,4945.922,15,17,13,11,16,9,16,25,23,Oxidation (M); Carbamidomethylation,87209.32,Striatin-3 OS=Homo sapiens OX=9606 GN=STRN3 PE=1 SV=3
950,TRUE,Q9Y2Q5	LTOR2_HUMAN,105.393295,2,353.77762,,,,,,,,2,1,3,1,2,,,,1,,13507.504,Ragulator complex protein LAMTOR2 OS=Homo sapiens OX=9606 GN=LAMTOR2 PE=1 SV=1
989,TRUE,O95977	S1PR4_HUMAN,59.679302,2,,,,1007.51746,,,,,2,1,,,2,,,,,Acetylation (N-term),41623.137,Sphingosine 1-phosphate receptor 4 OS=Homo sapiens OX=9606 GN=S1PR4 PE=1 SV=1
646,TRUE,P0CG47	UBB_HUMAN,188.32823,5,195193.3,145332.75,107518.73,163726.83,154516.27,159804.88,187127.61,214916.14,5,34,33,36,37,38,34,39,36,,25761.639,Polyubiquitin-B OS=Homo sapiens OX=9606 GN=UBB PE=1 SV=1
910,TRUE,P0C2W1	FBSP1_HUMAN,61.58033,2,,,,,,,,133.2923,2,,,,,1,,,1,,30632.719,F-box/SPRY domain-containing protein 1 OS=Homo sapiens OX=9606 GN=FBXO45 PE=1 SV=1
676,TRUE,Q9UBC2	EP15R_HUMAN,141.85744,5,,,,,,,,,5,,1,,3,2,4,5,2,,94255.086,Epidermal growth factor receptor substrate 15-like 1 OS=Homo sapiens OX=9606 GN=EPS15L1 PE=1 SV=1
383,TRUE,O95714	HERC2_HUMAN,184.16248,12,,,,,,,,347.89313,12,,,,,5,5,6,10,Oxidation (M),527227.9,E3 ubiquitin-protein ligase HERC2 OS=Homo sapiens OX=9606 GN=HERC2 PE=1 SV=2
906,TRUE,Q9BZM4	ULBP3_HUMAN,68.11597,2,,,,301.51224,,319.84692,365.21622,,2,2,1,1,1,2,2,3,1,,27949.3,UL16-binding protein 3 OS=Homo sapiens OX=9606 GN=ULBP3 PE=1 SV=1
551,TRUE,Q96JJ7	TMX3_HUMAN,195.1684,7,2161.137,1084.4249,628.5215,1813.7975,,,,307.2757,7,10,8,6,11,,1,1,4,Oxidation (M),51871.98,Protein disulfide-isomerase TMX3 OS=Homo sapiens OX=9606 GN=TMX3 PE=1 SV=2
155,TRUE,O94905	ERLN2_HUMAN,288.93027,17,27225.045,18182.703,12128.762,24649.7,21840.967,21262.527,31045.656,38715.105,16,33,37,27,36,32,32,40,39,Carbamidomethylation; Oxidation (M),37839.54,Erlin-2 OS=Homo sapiens OX=9606 GN=ERLIN2 PE=1 SV=1
220,TRUE,Q6YHK3	CD109_HUMAN,251.64642,19,2009.0072,780.2369,90.534805,1248.8145,166.29202,1185.7482,4534.0947,2428.114,19,15,4,7,8,7,8,13,13,Oxidation (M),161689.08,CD109 antigen OS=Homo sapiens OX=9606 GN=CD109 PE=1 SV=2
735,TRUE,Q5EBL8	PDZ11_HUMAN,159.41672,4,1503.3943,924.3844,467.35956,1004.0078,1241.0862,1927.8079,1929.0416,3878.8572,4,7,4,2,4,3,7,5,8,,16131.27,PDZ domain-containing protein 11 OS=Homo sapiens OX=9606 GN=PDZD11 PE=1 SV=2
308,TRUE,Q9ULV4	COR1C_HUMAN,261.97623,14,4283.6914,1999.5753,1588.3928,4799.3047,4960.2314,9981.059,8717.899,13089.673,13,13,12,9,11,15,15,18,15,Carbamidomethylation,53249.04,Coronin-1C OS=Homo sapiens OX=9606 GN=CORO1C PE=1 SV=1
563,TRUE,P36543	VATE1_HUMAN,143.99828,5,3081.851,1095.4443,766.649,1101.7356,334.5735,699.82446,1327.5969,1848.7452,5,6,3,6,3,4,3,3,3,Oxidation (M),26145.3,V-type proton ATPase subunit E 1 OS=Homo sapiens OX=9606 GN=ATP6V1E1 PE=1 SV=1
139,TRUE,P30519	HMOX2_HUMAN,327.17426,17,57432.047,39391.227,22949.703,48945.4,24427.027,31588.18,42718.895,45331.8,17,63,55,55,59,46,48,48,52,Oxidation (M); Carbamidomethylation; Acetylation (N-term),36032.867,Heme oxygenase 2 OS=Homo sapiens OX=9606 GN=HMOX2 PE=1 SV=2
98,FALSE,Q96NW7	LRRC7_HUMAN,83.586266,2,,,,,,,,,2,1,2,,2,2,,1,1,,172580.75,Leucine-rich repeat-containing protein 7 OS=Homo sapiens OX=9606 GN=LRRC7 PE=1 SV=1
427,TRUE,P49585	PCY1A_HUMAN,212.18234,9,2519.7065,840.83813,1387.0454,4322.601,4391.6377,4538.5737,5081.905,9043.058,9,8,3,9,11,13,11,13,13,Oxidation (M),41731,Choline-phosphate cytidylyltransferase A OS=Homo sapiens OX=9606 GN=PCYT1A PE=1 SV=2
512,TRUE,Q8NB49	AT11C_HUMAN,163.11072,7,924.1116,442.093,,568.46277,,290.17365,536.7678,865.8017,5,8,8,4,6,5,4,8,8,Oxidation (M),129477.17,Phospholipid-transporting ATPase IG OS=Homo sapiens OX=9606 GN=ATP11C PE=1 SV=3
21,TRUE,Q86UP2	KTN1_HUMAN,413.79376,66,67216.53,44235.4,19658.297,63271.63,11656.355,14596.986,17696.465,26043.152,66,114,95,66,89,53,59,63,73,Oxidation (M),156275.25,Kinectin OS=Homo sapiens OX=9606 GN=KTN1 PE=1 SV=1
264,TRUE,Q9Y2G3	AT11B_HUMAN,200.8622,14,1822.0364,483.23486,71.80253,992.7131,,,744.0448,1251.3346,11,15,8,7,13,4,5,10,14,Carbamidomethylation; Oxidation (M),134189.83,Probable phospholipid-transporting ATPase IF OS=Homo sapiens OX=9606 GN=ATP11B PE=1 SV=2
436,TRUE,Q8WUD1	RAB2B_HUMAN,225.5465,9,31284.086,25976.1,18439.46,31239.447,5000.2466,6529.597,11745.497,14571.033,9,25,24,22,22,13,9,10,11,Oxidation (M); Carbamidomethylation,24214.357,Ras-related protein Rab-2B OS=Homo sapiens OX=9606 GN=RAB2B PE=1 SV=1
640,TRUE,Q9UHN6	CEIP2_HUMAN,134.03003,6,912.76404,190.46687,280.3389,112.02902,405.5468,132.53683,192.46008,514.9507,6,3,2,2,5,5,1,1,4,Oxidation (M),154373.7,Cell surface hyaluronidase OS=Homo sapiens OX=9606 GN=CEMIP2 PE=1 SV=1
742,TRUE,Q8WUM9	S20A1_HUMAN,122.96505,4,2505.0771,1421.963,914.25116,2637.584,1412.8794,1910.2792,3751.3171,3777.5137,4,2,3,4,3,3,3,5,4,,73699.67,Sodium-dependent phosphate transporter 1 OS=Homo sapiens OX=9606 GN=SLC20A1 PE=1 SV=1
99,TRUE,Q92817	EVPL_HUMAN,313.81018,35,4333.3667,1553.831,70.17723,2542.436,1941.4275,4595.986,5921.867,8285.509,35,27,24,11,26,22,35,38,35,Oxidation (M),231604.11,Envoplakin OS=Homo sapiens OX=9606 GN=EVPL PE=1 SV=3
938,TRUE,Q8NB16	MLKL_HUMAN,82.29579,2,,,,,,,157.67657,178.73529,2,,,,,,,2,1,,54479.06,Mixed lineage kinase domain-like protein OS=Homo sapiens OX=9606 GN=MLKL PE=1 SV=1
685,TRUE,O43464	HTRA2_HUMAN,182.91988,5,3745.2007,2422.6123,863.28125,2166.9097,,,,,5,7,7,8,8,,,,,,48840.848,"Serine protease HTRA2, mitochondrial OS=Homo sapiens OX=9606 GN=HTRA2 PE=1 SV=2"
379,TRUE,Q8IVT2	MISP_HUMAN,216.28816,12,1446.7979,987.8771,324.8487,144.6936,1640.2734,1708.8662,2713.7915,1491.4368,12,7,8,2,7,6,9,13,14,,75356.516,Mitotic interactor and substrate of PLK1 OS=Homo sapiens OX=9606 GN=MISP PE=1 SV=1
323,FALSE,Q96L46	CPNS2_HUMAN,66.07215,2,,,1536.995,2413.011,801.64307,903.098,2498.8887,2996.1782,2,,,2,2,3,3,2,2,,27660.227,Calpain small subunit 2 OS=Homo sapiens OX=9606 GN=CAPNS2 PE=1 SV=2
245,TRUE,P19784	CSK22_HUMAN,276.51883,14,10503.777,6540.9,4345.705,9830.382,10306.57,10054.622,16796.195,22885,13,28,21,18,23,24,19,31,25,Oxidation (M); Carbamidomethylation,41213.23,Casein kinase II subunit alpha' OS=Homo sapiens OX=9606 GN=CSNK2A2 PE=1 SV=1
371,TRUE,Q8NDI1	EHBP1_HUMAN,214.95523,11,,,,,195.58177,433.72958,1319.6963,1659.2725,11,1,,,2,5,7,13,12,Oxidation (M),140017.3,EH domain-binding protein 1 OS=Homo sapiens OX=9606 GN=EHBP1 PE=1 SV=3
293,TRUE,Q96J02	ITCH_HUMAN,246.05493,15,2345.1836,1448.9675,565.9075,429.42322,3980.9731,3450.0571,6674.8755,8454.069,13,3,2,3,4,13,13,16,16,,102802.805,E3 ubiquitin-protein ligase Itchy homolog OS=Homo sapiens OX=9606 GN=ITCH PE=1 SV=2
393,TRUE,Q6P1N0	C2D1A_HUMAN,197.10373,11,,,,429.17902,,,1371.764,2067.031,11,,,2,3,,1,8,9,,104062.47,Coiled-coil and C2 domain-containing protein 1A OS=Homo sapiens OX=9606 GN=CC2D1A PE=1 SV=1
93,TRUE,P12830	CADH1_HUMAN,409.24695,32,651517.75,471614.53,306906,492710.56,440810.4,480405.84,581741.4,644988.5,29,152,140,122,133,134,133,128,138,Carbamidomethylation; Oxidation (M),97456.15,Cadherin-1 OS=Homo sapiens OX=9606 GN=CDH1 PE=1 SV=3
800,TRUE,P43353	AL3B1_HUMAN,113.77134,3,2176.9814,1252.3864,856.90845,1982.053,376.6206,430.88458,599.63806,843.87,3,2,3,2,3,3,3,2,3,,51839.7,Aldehyde dehydrogenase family 3 member B1 OS=Homo sapiens OX=9606 GN=ALDH3B1 PE=1 SV=1
823,TRUE,Q5JTD0	TJAP1_HUMAN,71.065895,3,,,,,,,,651.24365,3,,,,,,,1,3,,61821.242,Tight junction-associated protein 1 OS=Homo sapiens OX=9606 GN=TJAP1 PE=1 SV=1
683,TRUE,Q9Y287	ITM2B_HUMAN,158.90094,5,1294.3683,942.6749,526.2647,1169.2745,1982.3519,2182.5432,3095.633,3192.3523,5,1,2,3,3,3,3,7,3,,30338.035,Integral membrane protein 2B OS=Homo sapiens OX=9606 GN=ITM2B PE=1 SV=1
566,TRUE,P61421	VA0D1_HUMAN,188.36021,7,3238.4946,2341.1777,1080.241,3515.6106,308.84592,,576.8117,1058.5171,7,7,10,5,9,1,1,5,2,Carbamidomethylation,40329.094,V-type proton ATPase subunit d 1 OS=Homo sapiens OX=9606 GN=ATP6V0D1 PE=1 SV=1
992,TRUE,Q7Z6M3	MILR1_HUMAN,101.62493,2,,,,,,,296.93634,327.79236,2,,,2,1,2,1,2,1,,38735.387,Allergin-1 OS=Homo sapiens OX=9606 GN=MILR1 PE=1 SV=2
792,TRUE,Q6IQ22	RAB12_HUMAN,137.52461,3,708.8325,,,,,,,291.58722,2,14,13,10,11,5,5,9,8,,27248.398,Ras-related protein Rab-12 OS=Homo sapiens OX=9606 GN=RAB12 PE=1 SV=3
20,TRUE,P29317	EPHA2_HUMAN,440.03427,51,802339,587534,372361.9,622349.6,561932.9,627283.6,738539.5,857583.3,47,252,227,196,225,212,232,238,251,Oxidation (M); Carbamidomethylation,108266.41,Ephrin type-A receptor 2 OS=Homo sapiens OX=9606 GN=EPHA2 PE=1 SV=2
619,TRUE,P04233	HG2A_HUMAN,152.38225,4,2584.1047,1323.269,547.42584,2048.5413,511.5841,773.8406,1234.6577,1898.8823,4,4,7,3,5,3,2,2,4,Oxidation (M),33515.586,HLA class II histocompatibility antigen gamma chain OS=Homo sapiens OX=9606 GN=CD74 PE=1 SV=3
318,TRUE,P18085	ARF4_HUMAN,225.67557,9,8363.166,4664.283,5308.056,9036.223,8163.1016,9919.07,24513.844,33026.47,6,25,27,36,38,31,33,31,28,Oxidation (M); Carbamidomethylation,20510.771,ADP-ribosylation factor 4 OS=Homo sapiens OX=9606 GN=ARF4 PE=1 SV=3
54,TRUE,P10809	CH60_HUMAN,416.8148,36,62397.95,43244.117,44216.113,79932.74,155607.67,154597.34,172248.94,182880.75,36,69,62,77,86,120,108,127,106,Carbamidomethylation; Oxidation (M),61054.63,"60 kDa heat shock protein, mitochondrial OS=Homo sapiens OX=9606 GN=HSPD1 PE=1 SV=2"
596,TRUE,P0DP23	CALM1_HUMAN,144.50002,6,2508.3958,1173.0145,1005.43744,2768.9917,830.64856,169.68666,845.9133,1069.0598,6,8,4,4,6,5,6,3,2,Acetylation (N-term); Oxidation (M),16837.582,Calmodulin-1 OS=Homo sapiens OX=9606 GN=CALM1 PE=1 SV=1
235,TRUE,Q5JWF2	GNAS1_HUMAN,253.42369,15,14900.128,10906.795,7609.993,14338.168,5887.6255,7195.5444,9669.736,13165.296,13,33,32,26,34,20,26,25,33,Oxidation (M),111024.516,Guanine nucleotide-binding protein G(s) subunit alpha isoforms XLas OS=Homo sapiens OX=9606 GN=GNAS PE=1 SV=2
519,TRUE,P42566	EPS15_HUMAN,158.95488,8,,,,,225.69908,336.2865,297.52142,487.33386,8,,,1,1,5,4,5,3,,98655.74,Epidermal growth factor receptor substrate 15 OS=Homo sapiens OX=9606 GN=EPS15 PE=1 SV=2
728,TRUE,Q9BZL6	KPCD2_HUMAN,125.51933,4,,,,,119.61241,142.3302,,450.10812,4,,,,1,4,1,2,4,,96722.19,Serine/threonine-protein kinase D2 OS=Homo sapiens OX=9606 GN=PRKD2 PE=1 SV=3
132,TRUE,Q15262	PTPRK_HUMAN,291.9274,25,7860.089,4558.8706,1511.469,6057.748,3471.818,2946.954,6731.7026,9521.1455,24,28,26,17,21,13,9,29,26,Oxidation (M); Carbamidomethylation,162102.14,Receptor-type tyrosine-protein phosphatase kappa OS=Homo sapiens OX=9606 GN=PTPRK PE=1 SV=2
302,TRUE,Q15758	AAAT_HUMAN,252.32246,13,22441.605,14735.737,11654.41,18666.4,10534.2705,11757.317,12782.768,17588.07,13,21,16,17,20,8,11,15,15,Carbamidomethylation; Oxidation (M); Acetylation (N-term),56598.336,Neutral amino acid transporter B(0) OS=Homo sapiens OX=9606 GN=SLC1A5 PE=1 SV=2
27,TRUE,Q9Y490	TLN1_HUMAN,426.5096,61,223.85605,,1703.6799,6480.074,16022.341,16532.383,18129.049,676310.4,56,3,8,19,38,66,62,68,72,Oxidation (M); Carbamidomethylation,269767.06,Talin-1 OS=Homo sapiens OX=9606 GN=TLN1 PE=1 SV=3
655,TRUE,O15126	SCAM1_HUMAN,165.6778,5,3308.6597,861.47595,458.91238,2471.9346,,,,,5,8,9,3,6,2,,,,Oxidation (M),37920.426,Secretory carrier-associated membrane protein 1 OS=Homo sapiens OX=9606 GN=SCAMP1 PE=1 SV=2
387,TRUE,Q9H8V3	ECT2_HUMAN,190.656,11,,212.58038,,190.08163,626.5928,628.6172,769.7047,1082.842,11,3,2,5,5,13,4,6,9,Oxidation (M),103504.85,Protein ECT2 OS=Homo sapiens OX=9606 GN=ECT2 PE=1 SV=4
361,TRUE,Q9UI12	VATH_HUMAN,238.97891,10,1342.5881,765.8352,341.30414,1999.5586,2121.7793,2847.3306,4732.7446,5748.8433,10,6,10,9,8,11,12,11,14,Oxidation (M),55883.066,V-type proton ATPase subunit H OS=Homo sapiens OX=9606 GN=ATP6V1H PE=1 SV=1
405,FALSE,Q96KV6	BT2A3_HUMAN,93.41623,2,2140.5557,,,1858.6134,1308.1136,1773.702,143.98256,128.64285,2,2,1,1,1,1,1,2,2,Oxidation (M),65713.19,Putative butyrophilin subfamily 2 member A3 OS=Homo sapiens OX=9606 GN=BTN2A3P PE=5 SV=2
776,TRUE,Q7L5Y9	MAEA_HUMAN,122.22393,4,346.7653,89.02302,,365.04248,366.93317,709.9391,520.262,1128.0194,4,2,1,,2,1,2,6,4,,45287.285,E3 ubiquitin-protein transferase MAEA OS=Homo sapiens OX=9606 GN=MAEA PE=1 SV=1
107,TRUE,Q5JTH9	RRP12_HUMAN,338.61115,30,2224.9697,2120.459,2911.7056,6583.587,8449.695,7663.775,16667.738,17858.436,30,22,20,22,26,37,42,45,35,Oxidation (M); Carbamidomethylation,143702.1,RRP12-like protein OS=Homo sapiens OX=9606 GN=RRP12 PE=1 SV=2
421,TRUE,P00749	UROK_HUMAN,227.87965,9,12723.847,9753.613,4924.516,9902.162,11338.992,8769.08,13937.67,18015.164,9,15,17,8,15,16,15,19,19,Oxidation (M),48507.418,Urokinase-type plasminogen activator OS=Homo sapiens OX=9606 GN=PLAU PE=1 SV=2
283,TRUE,Q9UGI8	TES_HUMAN,201.30495,12,515.2396,370.62564,1041.2566,740.57275,5693.7764,2564.7695,5958.254,11083.064,12,6,2,3,12,12,8,20,16,Carbamidomethylation; Oxidation (M),47996.402,Testin OS=Homo sapiens OX=9606 GN=TES PE=1 SV=1
464,TRUE,Q96SB4	SRPK1_HUMAN,185.0575,8,,326.52588,138.41226,490.90884,960.84076,1218.8845,4885.8145,1985.8292,8,6,2,5,8,4,6,12,9,Oxidation (M),74324.77,SRSF protein kinase 1 OS=Homo sapiens OX=9606 GN=SRPK1 PE=1 SV=2
536,TRUE,Q8N2K0	ABD12_HUMAN,155.63986,8,930.15704,157.79422,,688.5713,,216.79318,392.7476,1330.9714,8,7,3,3,8,4,4,5,7,,45096.758,Lysophosphatidylserine lipase ABHD12 OS=Homo sapiens OX=9606 GN=ABHD12 PE=1 SV=2
986,TRUE,Q96BI3	APH1A_HUMAN,69.493095,2,230.60251,,,,,,,,2,1,1,1,,,,,,,28996.074,Gamma-secretase subunit APH-1A OS=Homo sapiens OX=9606 GN=APH1A PE=1 SV=1
522,TRUE,P15529	MCP_HUMAN,154.94016,7,26401.645,20227.71,11255.205,19889.4,16210.042,18998.291,23942.148,26928.822,7,11,11,9,13,6,12,14,12,Carbamidomethylation; Oxidation (M),43747.305,Membrane cofactor protein OS=Homo sapiens OX=9606 GN=CD46 PE=1 SV=3
529,TRUE,Q9P258	RCC2_HUMAN,188.40327,8,1015.6123,342.2331,197.74591,491.44913,2389.5906,2633.6873,2666.1626,4427.4697,8,5,5,5,4,9,7,6,9,Carbamidomethylation,56084.516,Protein RCC2 OS=Homo sapiens OX=9606 GN=RCC2 PE=1 SV=2
163,TRUE,Q9UQB8	BAIP2_HUMAN,280.971,20,9107.813,8392.987,5549.669,16808.074,7861.8623,8950.234,20065.666,28080.266,20,35,25,39,36,31,34,38,41,Oxidation (M),60867.598,Brain-specific angiogenesis inhibitor 1-associated protein 2 OS=Homo sapiens OX=9606 GN=BAIAP2 PE=1 SV=1
336,TRUE,O95817	BAG3_HUMAN,224.42996,12,1601.5125,696.02985,1634.9413,4209.3477,4219.503,6177.2837,9081.285,11861.41,12,4,11,5,14,10,13,14,16,Carbamidomethylation; Oxidation (M),61594.684,BAG family molecular chaperone regulator 3 OS=Homo sapiens OX=9606 GN=BAG3 PE=1 SV=3
210,TRUE,Q04912	RON_HUMAN,268.18558,19,14358.912,692.19403,87.72992,727.1655,15470.081,16015.346,5558.547,7040.4604,18,13,5,5,10,15,17,22,26,Oxidation (M); Carbamidomethylation,152241.44,Macrophage-stimulating protein receptor OS=Homo sapiens OX=9606 GN=MST1R PE=1 SV=3
783,TRUE,Q96S97	MYADM_HUMAN,138.60512,2,45381.297,27976.904,14446.159,35164.914,18487.04,22845.615,25308.926,33080.12,2,19,15,14,21,13,13,21,18,Oxidation (M),35273.59,Myeloid-associated differentiation marker OS=Homo sapiens OX=9606 GN=MYADM PE=1 SV=2
339,TRUE,P55010	IF5_HUMAN,193.99544,10,,,312.8234,2274.6562,2929.3516,3298.3281,6625.057,6478.475,10,3,,5,7,13,9,15,11,Oxidation (M),49222.723,Eukaryotic translation initiation factor 5 OS=Homo sapiens OX=9606 GN=EIF5 PE=1 SV=2
944,TRUE,Q7L804	RFIP2_HUMAN,95.64086,2,2118.8462,1042.8185,708.0777,,1073.9255,1119.5253,1978.3552,2402.4702,2,2,1,1,1,3,2,3,1,,58279.066,Rab11 family-interacting protein 2 OS=Homo sapiens OX=9606 GN=RAB11FIP2 PE=1 SV=1
105,TRUE,O00159	MYO1C_HUMAN,337.4129,31,13037.808,4391.1963,4087.995,8721.029,7511.9272,6466.8228,16008.301,22200.818,29,32,34,25,31,31,34,44,40,Oxidation (M); Carbamidomethylation,121681.67,Unconventional myosin-Ic OS=Homo sapiens OX=9606 GN=MYO1C PE=1 SV=4
701,TRUE,Q9Y6M5	ZNT1_HUMAN,139.52832,4,551.10034,221.10703,,343.48334,407.82422,664.312,735.0281,1716.8284,4,1,2,1,2,2,2,5,5,,55299.81,Zinc transporter 1 OS=Homo sapiens OX=9606 GN=SLC30A1 PE=1 SV=3
15,TRUE,P10586	PTPRF_HUMAN,455.30682,81,97871.71,58825.98,32315.277,76534.25,56903.363,62728.746,61909.617,95913.66,72,116,120,96,129,104,114,138,132,Oxidation (M); Carbamidomethylation,212878.88,Receptor-type tyrosine-protein phosphatase F OS=Homo sapiens OX=9606 GN=PTPRF PE=1 SV=2
225,TRUE,Q8NBU5	ATAD1_HUMAN,262.35208,14,19691.398,16177.621,10461.837,18995.693,4913.5825,5117.93,9734.629,10408.053,14,22,25,20,28,14,14,18,19,Carbamidomethylation; Oxidation (M),40744.03,ATPase family AAA domain-containing protein 1 OS=Homo sapiens OX=9606 GN=ATAD1 PE=1 SV=1
238,TRUE,P61106	RAB14_HUMAN,289.53824,15,68487.39,37125.805,29074.197,39190.543,22603.865,26029.74,32424.814,32421.633,14,45,43,43,45,32,28,35,36,Oxidation (M); Carbamidomethylation,23896.941,Ras-related protein Rab-14 OS=Homo sapiens OX=9606 GN=RAB14 PE=1 SV=4
631,TRUE,P28676	GRAN_HUMAN,131.30327,5,,,,563.76025,246.54967,,392.42334,,5,,,1,5,6,7,5,6,Oxidation (M),24010.01,Grancalcin OS=Homo sapiens OX=9606 GN=GCA PE=1 SV=2
608,TRUE,O43159	RRP8_HUMAN,197.06267,6,,,,150.15707,162.05551,,1056.642,2058.125,6,3,3,4,5,6,6,11,6,,50714.76,Ribosomal RNA-processing protein 8 OS=Homo sapiens OX=9606 GN=RRP8 PE=1 SV=2
119,TRUE,O43491	E41L2_HUMAN,305.3184,29,5935.8994,2628.4773,1400.9814,4224.356,2446.734,2571.1902,5884.667,9026.009,29,29,22,22,27,16,21,29,30,Oxidation (M); Carbamidomethylation,112588.08,Band 4.1-like protein 2 OS=Homo sapiens OX=9606 GN=EPB41L2 PE=1 SV=1
539,TRUE,P55011	S12A2_HUMAN,169.97598,8,3020.8645,1285.638,,829.78735,171.16046,298.29697,248.6971,563.1461,8,8,10,6,6,6,4,2,4,Oxidation (M),131447.11,Solute carrier family 12 member 2 OS=Homo sapiens OX=9606 GN=SLC12A2 PE=1 SV=1
841,TRUE,O00255	MEN1_HUMAN,124.695816,3,,,,,,,,96.14302,3,,,,,,,2,2,,68023.38,Menin OS=Homo sapiens OX=9606 GN=MEN1 PE=1 SV=4
200,TRUE,P46459	NSF_HUMAN,255.18413,21,10269.4,6504.3945,2629.3171,6781.993,1781.8867,2198.3506,4146.4536,5260.8447,21,26,25,18,24,9,12,15,18,Oxidation (M); Carbamidomethylation,82594.34,Vesicle-fusing ATPase OS=Homo sapiens OX=9606 GN=NSF PE=1 SV=3
36,TRUE,P08238	HS90B_HUMAN,439.73917,47,85246.9,62843.258,114987.87,182756.7,255885.27,264951.22,413148.2,464182.44,28,120,100,140,184,212,206,245,247,Carbamidomethylation; Oxidation (M); Acetylation (N-term),83264.195,Heat shock protein HSP 90-beta OS=Homo sapiens OX=9606 GN=HSP90AB1 PE=1 SV=4
866,TRUE,O95471	CLD7_HUMAN,133.32169,2,6551.6826,3770.8325,2775.92,5145.95,2107.5393,2767.9736,4063.6365,6093.117,2,11,2,3,4,4,3,10,9,Oxidation (M),22418.488,Claudin-7 OS=Homo sapiens OX=9606 GN=CLDN7 PE=1 SV=4
916,TRUE,Q01469	FABP5_HUMAN,59.540848,2,,,206.77756,478.4178,,,242.19363,297.49197,2,,,1,3,,,2,4,,15164.425,Fatty acid-binding protein 5 OS=Homo sapiens OX=9606 GN=FABP5 PE=1 SV=3
883,TRUE,P01008	ANT3_HUMAN,96.06166,2,,,,192.22487,,274.25674,,138.68085,2,2,3,2,3,1,1,1,2,,52602.43,Antithrombin-III OS=Homo sapiens OX=9606 GN=SERPINC1 PE=1 SV=1
1000,TRUE,P36941	TNR3_HUMAN,76.62457,2,1575.4314,,,1220.9866,592.1297,,1202.5693,1092.5057,2,2,,,2,1,,2,1,Carbamidomethylation,46709.07,Tumor necrosis factor receptor superfamily member 3 OS=Homo sapiens OX=9606 GN=LTBR PE=1 SV=1
705,FALSE,Q9Y5F2	PCDBB_HUMAN,89.42716,2,297.44473,,,176.94254,,,,520.02356,2,1,1,,1,,,,2,,87088.36,Protocadherin beta-11 OS=Homo sapiens OX=9606 GN=PCDHB11 PE=2 SV=1
688,TRUE,Q8TEW0	PARD3_HUMAN,114.8011,5,,,,,,,259.2339,355.18274,5,,,,1,3,2,4,4,Oxidation (M),151423.11,Partitioning defective 3 homolog OS=Homo sapiens OX=9606 GN=PARD3 PE=1 SV=2
342,TRUE,O60353	FZD6_HUMAN,225.15878,12,6857.573,2194.4795,1451.6332,3637.3909,2720.6067,3359.955,3686.708,6449.13,12,16,15,13,18,10,13,11,15,Carbamidomethylation; Oxidation (M),79292.05,Frizzled-6 OS=Homo sapiens OX=9606 GN=FZD6 PE=1 SV=2
489,TRUE,P35613	BASI_HUMAN,218.045,8,19402.973,9763.778,9137.411,17505.658,7969.7295,8479.302,11676.311,14591.444,8,14,19,14,19,16,11,10,12,Oxidation (M),42200.363,Basigin OS=Homo sapiens OX=9606 GN=BSG PE=1 SV=2
881,TRUE,O15551	CLD3_HUMAN,145.70023,3,1486.9076,1053.7566,377.32034,764.9853,432.0818,,,450.1986,2,6,6,3,6,5,2,2,4,,23318.518,Claudin-3 OS=Homo sapiens OX=9606 GN=CLDN3 PE=1 SV=1
448,TRUE,P51511	MMP15_HUMAN,197.9477,8,1970.738,819.52295,579.72125,1492.868,1208.0424,659.45575,1997.1938,3770.3574,7,9,6,9,10,5,9,9,9,Oxidation (M),75806.93,Matrix metalloproteinase-15 OS=Homo sapiens OX=9606 GN=MMP15 PE=1 SV=1
450,TRUE,Q96JB2	COG3_HUMAN,168.99693,8,,,,,,112.33414,692.5001,1858.4418,7,,,1,1,3,1,8,7,Oxidation (M),94095.91,Conserved oligomeric Golgi complex subunit 3 OS=Homo sapiens OX=9606 GN=COG3 PE=1 SV=3
782,TRUE,Q9NS86	LANC2_HUMAN,105.259865,4,,,,,,836.8825,814.47345,888.49744,4,,,1,,,3,3,3,Oxidation (M),50854.305,LanC-like protein 2 OS=Homo sapiens OX=9606 GN=LANCL2 PE=1 SV=1
831,TRUE,Q08209	PP2BA_HUMAN,88.35954,3,232.07475,,,229.46194,,233.79854,568.1012,555.79865,2,1,1,3,2,2,1,2,3,Oxidation (M),58687.84,Serine/threonine-protein phosphatase 2B catalytic subunit alpha isoform OS=Homo sapiens OX=9606 GN=PPP3CA PE=1 SV=1
738,TRUE,Q9P0J7	KCMF1_HUMAN,149.07687,3,,,,99.54968,112.51501,482.7608,167.50708,217.5007,3,1,3,1,1,5,2,8,2,Oxidation (M),41945.367,E3 ubiquitin-protein ligase KCMF1 OS=Homo sapiens OX=9606 GN=KCMF1 PE=1 SV=2
508,TRUE,Q9HCK8	CHD8_HUMAN,149.17244,8,189.6604,,,102.87612,,445.8797,559.3397,1396.9355,8,1,,,2,,2,4,10,,290519.06,Chromodomain-helicase-DNA-binding protein 8 OS=Homo sapiens OX=9606 GN=CHD8 PE=1 SV=5
579,TRUE,P30825	SL7A1_HUMAN,169.60358,6,6935.501,3664.1826,3745.625,6961.021,1991.0167,2368.288,4886.7944,4950.519,6,9,9,9,8,7,8,7,5,Carbamidomethylation; Oxidation (M),67638.37,High affinity cationic amino acid transporter 1 OS=Homo sapiens OX=9606 GN=SLC7A1 PE=1 SV=1
623,TRUE,P41743	KPCI_HUMAN,208.27592,6,698.1909,204.71747,155.48564,532.51575,1737.3005,1965.0227,2276.4795,2848.3035,6,5,6,5,5,9,7,8,8,,68262.36,Protein kinase C iota type OS=Homo sapiens OX=9606 GN=PRKCI PE=1 SV=2
571,TRUE,P51159	RB27A_HUMAN,163.48553,7,1368.656,525.3421,407.1061,1089.408,344.6991,521.219,617.4436,658.264,6,12,17,17,15,6,6,13,9,,24868.068,Ras-related protein Rab-27A OS=Homo sapiens OX=9606 GN=RAB27A PE=1 SV=3
985,TRUE,Q14728	MFS10_HUMAN,112.206184,2,2155.1343,753.6654,862.8684,1991.6624,,,752.9546,895.216,2,3,2,3,3,2,3,2,2,,48339.15,Major facilitator superfamily domain-containing protein 10 OS=Homo sapiens OX=9606 GN=MFSD10 PE=1 SV=1
441,TRUE,Q8NHP6	MSPD2_HUMAN,196.29855,10,2999.75,1785.5977,638.19446,2256.1787,301.2788,447.45764,643.4856,1285.2379,10,13,9,7,15,3,2,5,5,Oxidation (M),59746.176,Motile sperm domain-containing protein 2 OS=Homo sapiens OX=9606 GN=MOSPD2 PE=1 SV=1
417,TRUE,Q9BTX1	NDC1_HUMAN,169.11172,8,2011.0127,1073.3497,538.14417,1560.9753,1123.4816,1852.8138,1282.9478,870.83655,8,4,7,3,5,6,6,4,7,Oxidation (M),76304.805,Nucleoporin NDC1 OS=Homo sapiens OX=9606 GN=NDC1 PE=1 SV=2
110,TRUE,P20936	RASA1_HUMAN,320.3092,27,6605.918,3007.3174,3207.7742,7803.115,21786.969,23074.176,32380.467,38102.594,27,19,20,24,28,46,36,47,48,Oxidation (M); Carbamidomethylation,116403.234,Ras GTPase-activating protein 1 OS=Homo sapiens OX=9606 GN=RASA1 PE=1 SV=1
99,FALSE,A8MZ36	EVPLL_HUMAN,105.94378,3,,,,222.07385,,,,344.09204,3,1,,1,1,1,,1,1,,33952.875,Envoplakin-like protein OS=Homo sapiens OX=9606 GN=EVPLL PE=2 SV=1
743,TRUE,Q92574	TSC1_HUMAN,123.16735,4,417.1276,8467.095,,8346.706,,776.9718,778.028,1262.3109,4,1,3,2,3,2,1,2,2,Acetylation (N-term); Oxidation (M),129766.58,Hamartin OS=Homo sapiens OX=9606 GN=TSC1 PE=1 SV=2
60,TRUE,O60292	SI1L3_HUMAN,331.59042,44,7156.407,3856.9766,1502.1001,4595.9897,9276.627,9368.273,18185.979,25827.2,44,32,24,17,31,40,45,47,62,Oxidation (M); Carbamidomethylation,194609.89,Signal-induced proliferation-associated 1-like protein 3 OS=Homo sapiens OX=9606 GN=SIPA1L3 PE=1 SV=3
459,TRUE,Q92542	NICA_HUMAN,188.99121,9,4442.715,938.29767,784.36145,1116.3419,127.30519,236.36629,1531.8485,532.141,9,11,9,11,13,1,2,3,4,,78410.92,Nicastrin OS=Homo sapiens OX=9606 GN=NCSTN PE=1 SV=2
359,TRUE,Q6NSJ5	LRC8E_HUMAN,251.48308,12,2863.8096,1211.3398,405.0379,2291.5442,1016.3296,808.56665,2186.942,3248.6748,11,11,10,11,13,14,9,15,14,Oxidation (M),90247.19,Volume-regulated anion channel subunit LRRC8E OS=Homo sapiens OX=9606 GN=LRRC8E PE=1 SV=2
726,TRUE,O14641	DVL2_HUMAN,105.28914,3,,107.30534,107.104576,275.08942,395.08807,392.599,746.27844,1008.37366,3,,1,1,1,1,1,3,4,Oxidation (M),78947.94,Segment polarity protein dishevelled homolog DVL-2 OS=Homo sapiens OX=9606 GN=DVL2 PE=1 SV=1
484,TRUE,Q99650	OSMR_HUMAN,182.11798,8,373.69434,634.55774,166.11165,,313.01743,447.8814,1573.2185,1383.231,8,6,4,3,2,7,5,7,12,Oxidation (M),110508.516,Oncostatin-M-specific receptor subunit beta OS=Homo sapiens OX=9606 GN=OSMR PE=1 SV=1
876,TRUE,Q9ULG1	INO80_HUMAN,126.58347,3,,,,,,,,126.84027,3,,,,1,,,1,5,,176753.33,Chromatin-remodeling ATPase INO80 OS=Homo sapiens OX=9606 GN=INO80 PE=1 SV=2
670,TRUE,P57105	SYJ2B_HUMAN,167.16096,5,4911.4146,3069.195,1072.6987,1976.3419,,,,,5,10,5,8,6,,1,1,2,,15928.054,Synaptojanin-2-binding protein OS=Homo sapiens OX=9606 GN=SYNJ2BP PE=1 SV=2
844,TRUE,P19256	LFA3_HUMAN,94.80542,2,7297.6636,5920.3804,4135.62,6676.7305,5441.624,6407.1616,7611.3677,8932.562,2,2,4,3,4,5,4,4,4,Oxidation (M),28147.377,Lymphocyte function-associated antigen 3 OS=Homo sapiens OX=9606 GN=CD58 PE=1 SV=1
748,TRUE,Q14451	GRB7_HUMAN,132.23459,4,,,,,,,,653.10077,4,,,1,2,1,3,1,3,Oxidation (M),59681.08,Growth factor receptor-bound protein 7 OS=Homo sapiens OX=9606 GN=GRB7 PE=1 SV=2
994,TRUE,P17152	TMM11_HUMAN,78.68924,2,205.25316,619.775,231.9849,735.6334,,,,,2,3,1,2,1,,,,,,21540.771,"Transmembrane protein 11, mitochondrial OS=Homo sapiens OX=9606 GN=TMEM11 PE=1 SV=1"
504,TRUE,Q96A49	SYAP1_HUMAN,205.68706,8,,,932.9863,2468.7734,,174.1455,1602.0231,1410.2196,8,,,4,10,1,1,12,9,Oxidation (M),39933.418,Synapse-associated protein 1 OS=Homo sapiens OX=9606 GN=SYAP1 PE=1 SV=1
954,TRUE,Q8TAG9	EXOC6_HUMAN,112.71448,2,,,,,,155.99252,605.99603,703.16876,2,,,,,2,3,4,2,Acetylation (N-term),93722.32,Exocyst complex component 6 OS=Homo sapiens OX=9606 GN=EXOC6 PE=1 SV=3
348,TRUE,P16422	EPCAM_HUMAN,242.24747,10,36983.844,31559.607,23570.076,41376.34,25766.387,25611.285,38940.93,38267.39,10,21,19,12,25,15,12,18,14,Carbamidomethylation; Oxidation (M),34932.277,Epithelial cell adhesion molecule OS=Homo sapiens OX=9606 GN=EPCAM PE=1 SV=2
91,TRUE,Q8WWI1	LMO7_HUMAN,322.1328,33,5328.12,1420.0913,1209.761,4045.162,4027.4612,6844.676,10992.054,14929.151,33,24,21,13,24,26,35,40,46,Oxidation (M); Carbamidomethylation,192695.64,LIM domain only protein 7 OS=Homo sapiens OX=9606 GN=LMO7 PE=1 SV=3
453,TRUE,Q01650	LAT1_HUMAN,262.82812,9,138367.67,93515.58,69617.15,113608.445,95209.9,104087.78,113328.25,133556.4,9,24,24,24,28,29,30,23,31,Oxidation (M); Carbamidomethylation,55010.24,Large neutral amino acids transporter small subunit 1 OS=Homo sapiens OX=9606 GN=SLC7A5 PE=1 SV=2
537,TRUE,P63000	RAC1_HUMAN,150.26498,7,1992.6323,1588.0083,4184.036,7440.6245,2247.5837,2822.8872,1670.6372,4047.8782,6,5,5,9,10,4,4,7,3,Carbamidomethylation; Oxidation (M),21450.102,Ras-related C3 botulinum toxin substrate 1 OS=Homo sapiens OX=9606 GN=RAC1 PE=1 SV=1
567,TRUE,P67775	PP2AA_HUMAN,183.0949,6,1847.947,1258.2548,519.50214,1921.8351,1117.1182,668.4365,3571.1592,4477.0967,6,2,2,6,6,3,4,8,6,Carbamidomethylation; Oxidation (M),35594.19,Serine/threonine-protein phosphatase 2A catalytic subunit alpha isoform OS=Homo sapiens OX=9606 GN=PPP2CA PE=1 SV=1
328,FALSE,Q6U841	S4A10_HUMAN,79.53139,2,,,,239.67987,,,91.16804,167.3462,2,4,1,2,1,,1,2,6,,125946.266,Sodium-driven chloride bicarbonate exchanger OS=Homo sapiens OX=9606 GN=SLC4A10 PE=1 SV=1
955,TRUE,Q9ULC3	RAB23_HUMAN,76.112595,2,,,,,,,,,2,1,1,,1,,,,,,26659.24,Ras-related protein Rab-23 OS=Homo sapiens OX=9606 GN=RAB23 PE=1 SV=1
1013,TRUE,O00762	UBE2C_HUMAN,71.20189,2,,,,,,,,587.27075,2,,,,,,,,2,,19652.299,Ubiquitin-conjugating enzyme E2 C OS=Homo sapiens OX=9606 GN=UBE2C PE=1 SV=1
490,TRUE,P54709	AT1B3_HUMAN,213.10828,8,17343.395,11602.175,7540.1914,14979.887,7375.0537,9020.189,12315.124,17379.488,8,16,13,16,14,11,14,12,13,Oxidation (M),31512.578,Sodium/potassium-transporting ATPase subunit beta-3 OS=Homo sapiens OX=9606 GN=ATP1B3 PE=1 SV=1
856,TRUE,Q8N5A5	ZGPAT_HUMAN,115.06996,3,,,50.485893,248.5382,,,161.70428,479.8219,3,,,1,1,,,2,4,,57358.676,Zinc finger CCCH-type with G patch domain-containing protein OS=Homo sapiens OX=9606 GN=ZGPAT PE=1 SV=3
204,TRUE,P18084	ITB5_HUMAN,295.0971,18,29965.953,24544.688,17546.92,30521.547,22030.375,26141.77,33372.29,37111.457,18,30,32,33,40,24,27,36,33,Oxidation (M),88054.21,Integrin beta-5 OS=Homo sapiens OX=9606 GN=ITGB5 PE=1 SV=1
532,FALSE,O14910	LIN7A_HUMAN,102.620995,2,1271.7628,711.0017,172.87408,1636.4216,853.4966,689.8334,1427.5303,1305.9861,2,2,3,4,2,5,1,2,3,,25996.723,Protein lin-7 homolog A OS=Homo sapiens OX=9606 GN=LIN7A PE=1 SV=2
729,TRUE,Q96EY7	PTCD3_HUMAN,138.3486,4,,,89.43797,,,,737.3532,1338.6357,4,,,1,,1,1,4,4,,78549.69,"Pentatricopeptide repeat domain-containing protein 3, mitochondrial OS=Homo sapiens OX=9606 GN=PTCD3 PE=1 SV=3"
715,TRUE,Q6P9F7	LRC8B_HUMAN,140.41867,4,589.497,,,,,,,161.57828,4,4,2,,,1,1,,1,,92389.79,Volume-regulated anion channel subunit LRRC8B OS=Homo sapiens OX=9606 GN=LRRC8B PE=1 SV=2
677,TRUE,Q86YZ3	HORN_HUMAN,157.27748,5,150.77112,155.78401,,,,,,210.84785,5,5,4,,,3,3,3,1,,282389.9,Hornerin OS=Homo sapiens OX=9606 GN=HRNR PE=1 SV=2
31,TRUE,P17301	ITA2_HUMAN,434.38202,51,512620.28,432110.53,292549.53,461694.97,430803.9,453411.1,549249.2,599964.8,51,196,172,169,194,177,183,187,193,Carbamidomethylation; Oxidation (M); Acetylation (N-term),129295.44,Integrin alpha-2 OS=Homo sapiens OX=9606 GN=ITGA2 PE=1 SV=1
852,TRUE,Q9Y6I3	EPN1_HUMAN,111.60689,3,120.33046,,,,,,,,2,3,1,,2,,,,1,,60293.27,Epsin-1 OS=Homo sapiens OX=9606 GN=EPN1 PE=1 SV=2
205,TRUE,Q9NQX3	GEPH_HUMAN,232.64902,17,,,,,531.90125,2382.1587,2234.9097,3147.5125,17,,,1,3,11,13,10,15,Acetylation (N-term); Oxidation (M); Carbamidomethylation,79748.39,Gephyrin OS=Homo sapiens OX=9606 GN=GPHN PE=1 SV=1
651,TRUE,P08670	VIME_HUMAN,146.8243,5,93.064575,126.670654,,,,,,,2,12,12,9,13,11,14,14,12,,53651.676,Vimentin OS=Homo sapiens OX=9606 GN=VIM PE=1 SV=4
692,TRUE,Q96QD8	S38A2_HUMAN,224.54536,5,11142.469,8033.9087,5093.089,10049.258,5542.7812,6770.3936,8824.001,9214.083,5,12,12,9,14,12,9,9,10,,56026.004,Sodium-coupled neutral amino acid transporter 2 OS=Homo sapiens OX=9606 GN=SLC38A2 PE=1 SV=2
115,TRUE,O60462	NRP2_HUMAN,347.52765,30,103161.05,69321.945,37232.742,75752.71,52556.973,72799.695,65589.9,58075.344,30,66,60,49,61,50,51,69,65,Oxidation (M); Carbamidomethylation,104830.65,Neuropilin-2 OS=Homo sapiens OX=9606 GN=NRP2 PE=1 SV=3
816,TRUE,P49841	GSK3B_HUMAN,127.14742,3,,,,,,,,163.10774,3,,,,,1,1,,6,,46744.336,Glycogen synthase kinase-3 beta OS=Homo sapiens OX=9606 GN=GSK3B PE=1 SV=2
589,TRUE,P09496	CLCA_HUMAN,164.55783,7,13993.091,6592.7812,4061.9946,6882.6245,1142.584,3177.7837,4231.456,5350.2256,6,15,12,10,7,1,6,4,5,Carbamidomethylation,27076.69,Clathrin light chain A OS=Homo sapiens OX=9606 GN=CLTA PE=1 SV=1
505,TRUE,Q9H2K8	TAOK3_HUMAN,178.32164,8,533.1876,245.93974,,358.05423,922.62744,1134.6962,1509.7339,2526.724,8,2,1,2,3,10,9,6,8,,105405.81,Serine/threonine-protein kinase TAO3 OS=Homo sapiens OX=9606 GN=TAOK3 PE=1 SV=2
8,TRUE,P49327	FAS_HUMAN,499.47504,103,41425.926,28993.62,27051.807,55534.79,182833.27,189074.81,195717.88,208299.27,103,94,95,111,114,208,212,203,213,Carbamidomethylation; Oxidation (M); Acetylation (N-term),273426.6,Fatty acid synthase OS=Homo sapiens OX=9606 GN=FASN PE=1 SV=3
252,TRUE,Q15019	SEPT2_HUMAN,258.8018,14,1536.8618,783.1114,2970.0286,5423.803,3858.9155,5283.1577,9639.6,11520.274,14,5,5,9,18,15,20,21,22,Oxidation (M); Carbamidomethylation,41487.47,Septin-2 OS=Homo sapiens OX=9606 GN=SEPTIN2 PE=1 SV=1
1004,TRUE,P57764	GSDMD_HUMAN,96.31112,2,,,,226.44968,813.9531,103.05066,346.60992,1502.0785,2,,,,2,2,2,6,3,,52801.035,Gasdermin-D OS=Homo sapiens OX=9606 GN=GSDMD PE=1 SV=1
290,TRUE,Q07666	KHDR1_HUMAN,257.71448,13,33193.785,27293.453,19656.64,39963.766,26274.156,27925.242,33312.336,33729.316,13,34,33,24,35,30,27,27,31,Oxidation (M),48227.332,"KH domain-containing, RNA-binding, signal transduction-associated protein 1 OS=Homo sapiens OX=9606 GN=KHDRBS1 PE=1 SV=1"
208,TRUE,Q96P48	ARAP1_HUMAN,262.43262,20,,,150.72726,799.2097,871.3253,1878.7021,4883.1045,4621.967,20,,,5,8,9,12,19,21,Acetylation (N-term); Carbamidomethylation,162191.52,"Arf-GAP with Rho-GAP domain, ANK repeat and PH domain-containing protein 1 OS=Homo sapiens OX=9606 GN=ARAP1 PE=1 SV=3"
574,TRUE,O75131	CPNE3_HUMAN,136.26886,7,,605.6946,897.8915,1769.2905,2874.5522,2962.2642,3889.774,4941.9116,7,1,4,4,4,5,9,5,11,Carbamidomethylation,60130.63,Copine-3 OS=Homo sapiens OX=9606 GN=CPNE3 PE=1 SV=1
254,TRUE,O75051	PLXA2_HUMAN,217.26454,16,110.303696,425.08905,95.55988,337.3284,,,389.19327,876.4634,7,19,21,16,15,20,12,15,23,Oxidation (M),211104.08,Plexin-A2 OS=Homo sapiens OX=9606 GN=PLXNA2 PE=1 SV=4
724,TRUE,Q9BPZ7	SIN1_HUMAN,142.24533,4,,,,220.7827,270.2151,70.519394,765.53284,577.81226,4,2,1,1,1,3,4,3,5,Acetylation (N-term),59122.83,Target of rapamycin complex 2 subunit MAPKAP1 OS=Homo sapiens OX=9606 GN=MAPKAP1 PE=1 SV=2
183,TRUE,O75534	CSDE1_HUMAN,285.0915,21,471.99228,,261.6729,2318.8552,5791.691,5860.9478,9010.343,11103.833,21,4,1,9,13,22,22,24,32,Oxidation (M); Carbamidomethylation,88884.66,Cold shock domain-containing protein E1 OS=Homo sapiens OX=9606 GN=CSDE1 PE=1 SV=2
439,TRUE,P67870	CSK2B_HUMAN,205.1123,7,11274.898,5247.758,3889.9795,7955.602,6891.55,10845.718,14773.724,16502.879,7,9,10,5,15,11,12,14,13,Carbamidomethylation; Oxidation (M),24942.416,Casein kinase II subunit beta OS=Homo sapiens OX=9606 GN=CSNK2B PE=1 SV=1
946,TRUE,O75695	XRP2_HUMAN,94.52869,2,3760.6099,1993.5632,1544.522,391.7378,385.06616,625.05035,1072.374,1512.508,2,2,3,4,3,2,2,3,1,,39641.062,Protein XRP2 OS=Homo sapiens OX=9606 GN=RP2 PE=1 SV=4
975,TRUE,P56962	STX17_HUMAN,112.83984,2,152.93372,293.37842,179.38283,786.7196,219.73734,,384.75836,376.5727,2,2,1,2,5,2,1,2,2,,33403.496,Syntaxin-17 OS=Homo sapiens OX=9606 GN=STX17 PE=1 SV=2
323,TRUE,P04632	CPNS1_HUMAN,219.72572,9,247.44038,,3386.1357,6131.586,2481.723,3123.5254,9030.691,7786.4805,9,6,1,10,16,18,12,16,14,Oxidation (M); Acetylation (N-term); Carbamidomethylation,28315.707,Calpain small subunit 1 OS=Homo sapiens OX=9606 GN=CAPNS1 PE=1 SV=1
234,TRUE,O95793	STAU1_HUMAN,277.98813,18,2706.289,1374.364,2588.5823,5226.0146,5555.682,6893.211,12079.209,15348.48,18,8,11,15,15,12,17,24,22,Oxidation (M),63182.277,Double-stranded RNA-binding protein Staufen homolog 1 OS=Homo sapiens OX=9606 GN=STAU1 PE=1 SV=2
902,TRUE,Q13685	AAMP_HUMAN,96.63167,2,,,,,466.6056,258.61295,351.55078,1020.74585,2,,,,,1,3,2,3,,46750.91,Angio-associated migratory cell protein OS=Homo sapiens OX=9606 GN=AAMP PE=1 SV=2
287,TRUE,P04114	APOB_HUMAN,241.65929,15,21849.82,15377.608,8508.415,16711.428,19225.396,20027.936,25235.639,30494.936,14,24,24,21,24,22,24,27,26,,515604.72,Apolipoprotein B-100 OS=Homo sapiens OX=9606 GN=APOB PE=1 SV=2
25,TRUE,O60610	DIAP1_HUMAN,402.3724,52,3092.4207,1017.3473,4360.5894,14776.562,20981.469,26890.459,41303.84,52656.965,52,25,20,44,59,69,71,81,71,Carbamidomethylation; Oxidation (M); Acetylation (N-term),141347.33,Protein diaphanous homolog 1 OS=Homo sapiens OX=9606 GN=DIAPH1 PE=1 SV=2
413,TRUE,Q9NR28	DBLOH_HUMAN,235.28645,10,15880.391,9060.657,6580.325,11075.232,,,,,10,15,18,14,17,1,2,1,1,Oxidation (M),27130.809,"Diablo homolog, mitochondrial OS=Homo sapiens OX=9606 GN=DIABLO PE=1 SV=1"
721,TRUE,Q8TCZ2	C99L2_HUMAN,136.41422,4,863.5676,,,,189.51476,,431.26834,858.0902,4,5,1,,2,4,2,2,3,Carbamidomethylation,27985.883,CD99 antigen-like protein 2 OS=Homo sapiens OX=9606 GN=CD99L2 PE=1 SV=1
89,TRUE,Q86W92	LIPB1_HUMAN,333.50424,29,3220.4219,2284.6477,4007.6875,7285.9683,11094.559,12824.287,23980.967,28680.645,29,13,12,20,36,30,32,46,48,Oxidation (M),114024.09,Liprin-beta-1 OS=Homo sapiens OX=9606 GN=PPFIBP1 PE=1 SV=2
306,TRUE,Q8TDW0	LRC8C_HUMAN,256.797,14,3238.056,1406.6843,640.49066,1847.9287,1440.9996,1390.0684,1207.5895,3015.9365,12,24,14,13,13,14,12,17,17,,92449.55,Volume-regulated anion channel subunit LRRC8C OS=Homo sapiens OX=9606 GN=LRRC8C PE=1 SV=2
646,TRUE,P62979	RS27A_HUMAN,188.32823,5,195193.3,145332.75,107518.73,163726.83,154516.27,159804.88,187127.61,214916.14,5,34,33,36,37,38,34,39,36,,17964.914,Ubiquitin-40S ribosomal protein S27a OS=Homo sapiens OX=9606 GN=RPS27A PE=1 SV=2
705,TRUE,Q9Y5E6	PCDB3_HUMAN,123.89643,4,437.66748,,,176.94254,,,,520.02356,4,2,1,,2,,1,,3,,86713.81,Protocadherin beta-3 OS=Homo sapiens OX=9606 GN=PCDHB3 PE=1 SV=2
863,TRUE,Q9NZN8	CNOT2_HUMAN,104.12799,3,,,,,,180.03766,255.39095,211.18428,3,,,,2,,2,2,5,,59737.695,CCR4-NOT transcription complex subunit 2 OS=Homo sapiens OX=9606 GN=CNOT2 PE=1 SV=1
818,TRUE,Q15382	RHEB_HUMAN,125.326706,3,1517.6119,956.11633,663.7108,1381.8702,1813.0226,1545.2266,2921.7078,3804.9111,3,2,2,3,3,4,6,4,3,,20497.48,GTP-binding protein Rheb OS=Homo sapiens OX=9606 GN=RHEB PE=1 SV=1
634,TRUE,Q8WXG6	MADD_HUMAN,144.64302,5,,,,,447.88937,,,291.74976,5,,,,,3,1,3,7,Oxidation (M),183303.23,MAP kinase-activating death domain protein OS=Homo sapiens OX=9606 GN=MADD PE=1 SV=2
616,TRUE,Q9UPT5	EXOC7_HUMAN,146.24281,6,,,,,66.994225,262.27325,88.46007,113.76528,6,2,1,,1,1,2,1,3,Oxidation (M),83381.92,Exocyst complex component 7 OS=Homo sapiens OX=9606 GN=EXOC7 PE=1 SV=3
33,TRUE,P23229	ITA6_HUMAN,475.7454,55,582642.75,392388.4,292741,490126,413542.2,464776.28,581165.25,712883,55,186,173,149,191,182,187,204,231,Oxidation (M); Carbamidomethylation,126605.5,Integrin alpha-6 OS=Homo sapiens OX=9606 GN=ITGA6 PE=1 SV=5
127,TRUE,P08069	IGF1R_HUMAN,312.19232,27,11418.988,6238.9097,2368.5488,6052.2847,7796.414,9224.025,11290.95,13754.981,22,28,25,23,27,27,26,39,35,Oxidation (M); Carbamidomethylation,154793.05,Insulin-like growth factor 1 receptor OS=Homo sapiens OX=9606 GN=IGF1R PE=1 SV=1
257,TRUE,Q86SQ0	PHLB2_HUMAN,235.98515,15,134.24406,,,,639.1966,1140.129,4228.969,5840.5195,15,4,1,1,6,12,13,22,18,Oxidation (M),142158.2,Pleckstrin homology-like domain family B member 2 OS=Homo sapiens OX=9606 GN=PHLDB2 PE=1 SV=2
168,TRUE,Q6P4Q7	CNNM4_HUMAN,314.51126,20,8253.753,4223.804,2307.3667,6079.122,4063.8489,4746.5845,8855.048,13080.351,17,28,20,19,18,19,22,24,33,Carbamidomethylation; Oxidation (M),86606.89,Metal transporter CNNM4 OS=Homo sapiens OX=9606 GN=CNNM4 PE=1 SV=3
750,TRUE,Q9NW15	ANO10_HUMAN,150.59647,4,1407.9604,596.0708,345.46017,962.51624,,458.44696,703.2972,1221.9531,4,6,6,2,7,1,1,1,3,Oxidation (M),76329.36,Anoctamin-10 OS=Homo sapiens OX=9606 GN=ANO10 PE=1 SV=2
797,TRUE,Q15642	CIP4_HUMAN,119.38636,3,,,,,,,219.97037,,3,,,1,3,3,2,3,,,68352.26,Cdc42-interacting protein 4 OS=Homo sapiens OX=9606 GN=TRIP10 PE=1 SV=3
839,TRUE,O15056	SYNJ2_HUMAN,117.99465,3,,,,,,,,754.5713,3,,1,,,,2,3,2,,165537.97,Synaptojanin-2 OS=Homo sapiens OX=9606 GN=SYNJ2 PE=1 SV=3
247,FALSE,Q6PCB7	S27A1_HUMAN,89.72751,2,,739.13574,400.77338,869.17645,206.26659,391.24133,153.85425,221.51381,2,1,2,4,1,2,2,3,1,Oxidation (M),71108.164,Long-chain fatty acid transport protein 1 OS=Homo sapiens OX=9606 GN=SLC27A1 PE=1 SV=1
385,TRUE,Q13177	PAK2_HUMAN,218.49133,12,,,714.28406,2626.5505,468.5807,241.30891,1774.8575,2813.411,12,1,,9,17,7,5,11,9,Oxidation (M),58042.605,Serine/threonine-protein kinase PAK 2 OS=Homo sapiens OX=9606 GN=PAK2 PE=1 SV=3
767,FALSE,Q9UMX0	UBQL1_HUMAN,87.41237,2,356.53946,,147.6796,146.05608,466.39062,655.66205,549.214,813.1166,2,2,1,1,1,3,4,2,1,,62518.89,Ubiquilin-1 OS=Homo sapiens OX=9606 GN=UBQLN1 PE=1 SV=2
44,TRUE,Q5UIP0	RIF1_HUMAN,415.92322,51,12638.98,5263.885,2136.7285,8717.779,10077.369,9832.272,17825.893,28237.164,51,48,39,35,52,56,56,54,69,Oxidation (M),274465.6,Telomere-associated protein RIF1 OS=Homo sapiens OX=9606 GN=RIF1 PE=1 SV=2
511,TRUE,O75386	TULP3_HUMAN,168.56033,6,,,,,882.9776,440.10565,1721.9572,1984.6926,6,1,1,1,1,8,5,9,9,Oxidation (M),49642.113,Tubby-related protein 3 OS=Homo sapiens OX=9606 GN=TULP3 PE=1 SV=2
398,TRUE,Q9HD67	MYO10_HUMAN,169.27336,11,,,,,360.15424,,377.85706,1628.4636,11,,,,,1,2,6,10,,237346.9,Unconventional myosin-X OS=Homo sapiens OX=9606 GN=MYO10 PE=1 SV=3
833,TRUE,P61769	B2MG_HUMAN,151.41245,3,32227.855,20861.436,16865.072,30733.375,25117.043,25699.164,36477.04,38934.375,3,9,10,10,9,9,9,10,12,Carbamidomethylation,13714.561,Beta-2-microglobulin OS=Homo sapiens OX=9606 GN=B2M PE=1 SV=1
19,TRUE,P46940	IQGA1_HUMAN,449.95502,65,20794.914,10866.545,35885.312,68999.32,61945.754,73175.02,100090.43,111087.266,63,69,56,74,87,97,116,135,128,Oxidation (M); Carbamidomethylation; Acetylation (N-term),189251.97,Ras GTPase-activating-like protein IQGAP1 OS=Homo sapiens OX=9606 GN=IQGAP1 PE=1 SV=1
622,TRUE,Q13546	RIPK1_HUMAN,134.54466,6,,,,,269.27753,273.5002,725.1261,1168.9523,6,,,1,3,4,3,6,5,,75930.84,Receptor-interacting serine/threonine-protein kinase 1 OS=Homo sapiens OX=9606 GN=RIPK1 PE=1 SV=3
851,TRUE,Q04656	ATP7A_HUMAN,108.33243,3,,,,,,,,,2,2,1,,2,1,3,4,2,,163372.77,Copper-transporting ATPase 1 OS=Homo sapiens OX=9606 GN=ATP7A PE=1 SV=4
553,TRUE,Q8TAA9	VANG1_HUMAN,206.24701,7,1788.8184,823.1853,286.24878,1082.9978,,,562.67554,776.52405,7,8,8,5,6,4,5,4,6,Acetylation (N-term),59974.984,Vang-like protein 1 OS=Homo sapiens OX=9606 GN=VANGL1 PE=1 SV=1
872,TRUE,Q96FJ2	DYL2_HUMAN,153.09377,3,,,,,,416.2627,,465.85718,2,7,6,4,5,7,7,14,14,Carbamidomethylation,10349.831,"Dynein light chain 2, cytoplasmic OS=Homo sapiens OX=9606 GN=DYNLL2 PE=1 SV=1"
586,TRUE,Q8IXI1	MIRO2_HUMAN,173.2878,7,1988.761,1714.1809,617.0012,2140.4438,439.5365,556.22955,1106.1412,2281.2283,5,12,13,11,14,7,8,9,12,,68117.83,Mitochondrial Rho GTPase 2 OS=Homo sapiens OX=9606 GN=RHOT2 PE=1 SV=2
392,TRUE,Q13425	SNTB2_HUMAN,184.86836,10,2539.3435,1356.3821,469.79297,1600.5366,2116.15,2011.1177,2271.1646,2882.7285,10,11,8,7,10,13,10,13,19,Oxidation (M),57949.59,Beta-2-syntrophin OS=Homo sapiens OX=9606 GN=SNTB2 PE=1 SV=1
937,TRUE,P0DOX7	IGK_HUMAN,105.41039,2,,,,,,,,,2,3,2,,,1,2,1,1,,23379.074,Immunoglobulin kappa light chain OS=Homo sapiens OX=9606 PE=1 SV=1
112,TRUE,P05556	ITB1_HUMAN,352.95926,25,694474.5,546726.4,399998.62,622472,546631.06,588407.9,706715.3,858542.44,25,126,112,102,119,114,114,113,119,Oxidation (M); Carbamidomethylation,88415.266,Integrin beta-1 OS=Homo sapiens OX=9606 GN=ITGB1 PE=1 SV=2
825,TRUE,Q15904	VAS1_HUMAN,95.54524,3,750.2678,424.85324,173.02856,542.744,,,,,3,3,3,1,4,,,,,,52025.812,V-type proton ATPase subunit S1 OS=Homo sapiens OX=9606 GN=ATP6AP1 PE=1 SV=2
365,TRUE,P13797	PLST_HUMAN,196.97578,10,,,191.30002,898.3954,2030.1465,1570.907,1602.171,4102.121,10,1,,3,7,11,10,8,11,Acetylation (N-term); Oxidation (M),70811.016,Plastin-3 OS=Homo sapiens OX=9606 GN=PLS3 PE=1 SV=4
1002,TRUE,Q9Y6D0	SELK_HUMAN,78.21022,2,439.14764,,82.12221,219.99779,179.00095,283.5127,472.24152,284.81274,2,2,2,1,2,1,1,1,2,,10613.811,Selenoprotein K OS=Homo sapiens OX=9606 GN=SELENOK PE=1 SV=3
884,TRUE,Q68DH5	LMBD2_HUMAN,93.12885,2,816.11316,334.38205,163.23329,683.211,,149.42845,294.85046,,2,1,1,1,3,1,1,1,1,Oxidation (M),81172.305,G-protein coupled receptor-associated protein LMBRD2 OS=Homo sapiens OX=9606 GN=LMBRD2 PE=1 SV=1
449,FALSE,P62834	RAP1A_HUMAN,197.31813,7,4149.391,3159.2466,2590.4526,4442.51,1400.2104,1205.4481,2353.6792,4112.077,4,10,8,11,9,6,7,13,10,Oxidation (M),20987.176,Ras-related protein Rap-1A OS=Homo sapiens OX=9606 GN=RAP1A PE=1 SV=1
381,TRUE,Q8NCG7	DGLB_HUMAN,239.81458,11,3458.215,2350.2686,1038.8899,1325.2703,1951.2086,1637.4888,2111.7542,3046.7334,11,15,10,7,10,13,8,14,15,Oxidation (M),73732.1,Diacylglycerol lipase-beta OS=Homo sapiens OX=9606 GN=DAGLB PE=1 SV=2
82,TRUE,O95573	ACSL3_HUMAN,339.22253,29,63107.19,37597.92,19572.295,44231.832,21494.148,21280.223,31603.3,41937.188,26,68,60,45,58,30,38,45,50,Oxidation (M); Carbamidomethylation; Acetylation (N-term),80420.086,Long-chain-fatty-acid--CoA ligase 3 OS=Homo sapiens OX=9606 GN=ACSL3 PE=1 SV=3
887,TRUE,Q9NVD7	PARVA_HUMAN,104.72392,2,,,,,,,109.836334,89.0993,2,,,,2,1,,5,3,,42243.723,Alpha-parvin OS=Homo sapiens OX=9606 GN=PARVA PE=1 SV=1
617,TRUE,P63167	DYL1_HUMAN,166.39401,3,3029.9353,2930.4414,2284.2075,3620.4983,5284.6123,5767.7153,6452.7188,8404.001,2,13,8,9,12,17,14,23,15,Oxidation (M); Carbamidomethylation,10365.876,"Dynein light chain 1, cytoplasmic OS=Homo sapiens OX=9606 GN=DYNLL1 PE=1 SV=1"
923,TRUE,Q9H4B6	SAV1_HUMAN,65.51225,2,,,,,,,,,2,,,,,,,1,1,,44633.957,Protein salvador homolog 1 OS=Homo sapiens OX=9606 GN=SAV1 PE=1 SV=2
564,TRUE,P60953	CDC42_HUMAN,207.969,7,4425.665,3499.147,3226.7292,8730.454,,,1927.0377,1466.4843,6,14,9,15,15,5,2,9,7,Carbamidomethylation,21258.604,Cell division control protein 42 homolog OS=Homo sapiens OX=9606 GN=CDC42 PE=1 SV=2
867,TRUE,Q13421	MSLN_HUMAN,113.28166,3,1146.2112,,333.88168,724.0771,565.3481,794.64526,807.5992,1614.8904,3,3,1,1,2,2,2,2,2,,68985.66,Mesothelin OS=Homo sapiens OX=9606 GN=MSLN PE=1 SV=2
785,TRUE,Q8IVF7	FMNL3_HUMAN,105.70711,3,,,,,,,,347.45224,3,2,,,,2,1,,2,,117212.83,Formin-like protein 3 OS=Homo sapiens OX=9606 GN=FMNL3 PE=1 SV=3
460,TRUE,P46934	NEDD4_HUMAN,164.86311,9,,,,,161.52408,529.05365,435.22546,1238.3582,9,2,1,,1,8,5,6,9,,149114.47,E3 ubiquitin-protein ligase NEDD4 OS=Homo sapiens OX=9606 GN=NEDD4 PE=1 SV=4
705,FALSE,Q9NRJ7	PCDBG_HUMAN,111.47974,3,437.66748,,,176.94254,,,,520.02356,3,2,1,,2,,1,,2,,84983.27,Protocadherin beta-16 OS=Homo sapiens OX=9606 GN=PCDHB16 PE=1 SV=3
203,TRUE,P98196	AT11A_HUMAN,240.75539,19,604943.25,3623.171,2269.1924,6602.632,546407.25,4932.091,7033.847,8491.516,16,22,17,18,19,20,21,22,19,Oxidation (M); Carbamidomethylation,129755.74,Probable phospholipid-transporting ATPase IH OS=Homo sapiens OX=9606 GN=ATP11A PE=1 SV=3
395,TRUE,P62873	GBB1_HUMAN,249.83916,10,1487.5098,935.1744,1358.3309,2321.4482,377.38834,217.58575,77.08165,1402.963,4,17,11,12,13,7,10,12,14,Carbamidomethylation; Oxidation (M); Acetylation (N-term),37376.96,Guanine nucleotide-binding protein G(I)/G(S)/G(T) subunit beta-1 OS=Homo sapiens OX=9606 GN=GNB1 PE=1 SV=3
548,TRUE,P09429	HMGB1_HUMAN,167.08182,6,,,849.8702,1593.2485,1888.8374,1837.9478,3605.4226,4248.7676,6,1,,3,6,4,4,7,11,Oxidation (M),24893.756,High mobility group protein B1 OS=Homo sapiens OX=9606 GN=HMGB1 PE=1 SV=3
256,TRUE,Q12866	MERTK_HUMAN,261.1539,16,2666.482,3848.5593,232.99353,2217.6147,1009.58984,1178.9812,2659.8074,3687.0566,14,21,18,11,13,10,15,16,20,Oxidation (M),110249.14,Tyrosine-protein kinase Mer OS=Homo sapiens OX=9606 GN=MERTK PE=1 SV=2
165,TRUE,Q86UE4	LYRIC_HUMAN,320.72186,23,35776.87,26567.77,16634.535,26430.027,3476.6892,2583.2502,5345.879,8122.8877,23,46,42,36,39,15,18,15,16,Oxidation (M),63836.98,Protein LYRIC OS=Homo sapiens OX=9606 GN=MTDH PE=1 SV=2
188,TRUE,Q9H2M9	RBGPR_HUMAN,268.86005,21,613.18915,85.72177,337.9262,1756.9551,1162.7424,2074.6667,5284.898,7008.6997,20,3,1,5,13,7,15,24,22,Oxidation (M),155984.77,Rab3 GTPase-activating protein non-catalytic subunit OS=Homo sapiens OX=9606 GN=RAB3GAP2 PE=1 SV=1
588,TRUE,O00220	TR10A_HUMAN,183.64912,5,1584.6796,1099.8806,438.58563,826.0675,1036.9241,1711.3788,2344.2603,2421.8882,5,5,5,7,6,6,3,7,12,Oxidation (M),50089.008,Tumor necrosis factor receptor superfamily member 10A OS=Homo sapiens OX=9606 GN=TNFRSF10A PE=1 SV=3
164,FALSE,Q01814	AT2B2_HUMAN,135.8925,7,217.205,,,,,,158.70107,,2,2,3,,5,,2,2,2,Oxidation (M),136876.31,Plasma membrane calcium-transporting ATPase 2 OS=Homo sapiens OX=9606 GN=ATP2B2 PE=1 SV=2
116,TRUE,P25705	ATPA_HUMAN,362.9573,27,78422.51,57990.066,36064.14,58431.957,94481.68,96880.83,118843.016,121308.64,27,54,48,38,42,64,64,69,59,Oxidation (M),59750.625,"ATP synthase subunit alpha, mitochondrial OS=Homo sapiens OX=9606 GN=ATP5F1A PE=1 SV=1"
440,TRUE,Q9Y3Z3	SAMH1_HUMAN,197.92964,10,135.7174,,,120.2087,430.14648,298.57056,1700.6616,2843.6082,10,3,,,1,9,4,15,12,Oxidation (M),72200.5,Deoxynucleoside triphosphate triphosphohydrolase SAMHD1 OS=Homo sapiens OX=9606 GN=SAMHD1 PE=1 SV=2
106,TRUE,P05141	ADT2_HUMAN,317.8831,29,245671.61,190976.08,155745.1,224057.5,204062.45,208822.83,229497.14,264072.4,11,101,84,79,97,92,83,100,85,Carbamidomethylation; Oxidation (M); Acetylation (N-term),32852.227,ADP/ATP translocase 2 OS=Homo sapiens OX=9606 GN=SLC25A5 PE=1 SV=7
83,TRUE,P0DMV9	HS71B_HUMAN,369.22928,35,29554.66,21149.662,19740.459,27999.37,37474.938,32765.516,32158.611,41241.875,13,71,56,61,73,86,70,79,84,Carbamidomethylation; Oxidation (M),70052.23,Heat shock 70 kDa protein 1B OS=Homo sapiens OX=9606 GN=HSPA1B PE=1 SV=1
199,TRUE,P28290	ITPI2_HUMAN,308.57318,19,1491.785,769.7982,,737.1143,1755.6924,2961.0405,5981.409,8044.129,19,13,8,1,6,20,15,22,22,Oxidation (M),138385.88,Protein ITPRID2 OS=Homo sapiens OX=9606 GN=ITPRID2 PE=1 SV=3
162,TRUE,O94832	MYO1D_HUMAN,203.8129,22,2689.8308,1187.8811,128.68109,1776.9647,,,1281.9413,2668.5688,22,15,11,8,13,1,,11,12,Oxidation (M),116202.19,Unconventional myosin-Id OS=Homo sapiens OX=9606 GN=MYO1D PE=1 SV=2
517,TRUE,Q13618	CUL3_HUMAN,180.38156,8,142.85962,,,,2403.4016,809.2932,1538.0616,1841.307,8,1,1,,2,5,6,12,10,,88930.19,Cullin-3 OS=Homo sapiens OX=9606 GN=CUL3 PE=1 SV=2
430,TRUE,Q5VZ89	DEN4C_HUMAN,207.28809,10,187.33485,,1607.2751,236.25883,4091.1636,4176.1616,3006.036,6051.591,10,3,1,2,1,7,4,7,7,,212710.64,DENN domain-containing protein 4C OS=Homo sapiens OX=9606 GN=DENND4C PE=1 SV=3
51,TRUE,P14923	PLAK_HUMAN,400.79535,43,244135.38,180743.27,102909.45,162318.1,137852.84,156652.77,169072.77,191387.47,36,146,144,130,126,139,124,130,122,Oxidation (M); Carbamidomethylation; Acetylation (N-term),81744.74,Junction plakoglobin OS=Homo sapiens OX=9606 GN=JUP PE=1 SV=3
620,TRUE,Q01844	EWS_HUMAN,223.23515,4,48637.37,36120.594,27038.426,46041.816,53904.684,56432.74,56332.59,65183.72,4,21,18,16,19,19,21,25,23,Oxidation (M),68478.234,RNA-binding protein EWS OS=Homo sapiens OX=9606 GN=EWSR1 PE=1 SV=1
73,TRUE,P15311	EZRI_HUMAN,369.95917,38,19239.643,12560.046,24497.062,48650.754,15959.509,16807.447,39006.977,47785.8,29,53,53,68,70,53,58,70,72,Oxidation (M); Carbamidomethylation,69412.805,Ezrin OS=Homo sapiens OX=9606 GN=EZR PE=1 SV=4
760,TRUE,Q99653	CHP1_HUMAN,113.97349,4,792.11646,212.66183,149.48209,355.57318,,,,,4,3,4,1,4,,,1,1,,22456.184,Calcineurin B homologous protein 1 OS=Homo sapiens OX=9606 GN=CHP1 PE=1 SV=3
423,TRUE,P05067	A4_HUMAN,202.07524,9,3970.5542,2597.5308,1460.5391,3419.1497,629.74554,2038.8712,1194.9294,1859.5024,8,8,7,5,10,5,10,8,8,Oxidation (M),86943.24,Amyloid-beta precursor protein OS=Homo sapiens OX=9606 GN=APP PE=1 SV=3
836,TRUE,Q9BW04	SARG_HUMAN,157.64233,3,,,,266.43246,723.2361,674.0044,1158.6903,1759.3484,3,1,,1,6,6,4,4,5,,63964.297,Specifically androgen-regulated gene protein OS=Homo sapiens OX=9606 GN=SARG PE=1 SV=2
111,TRUE,P11717	MPRI_HUMAN,339.41376,31,21531.21,14204.579,6288.178,13268.809,4864.091,5191.636,9849.094,10322.675,31,43,43,28,50,20,24,40,28,Oxidation (M); Carbamidomethylation,274374.8,Cation-independent mannose-6-phosphate receptor OS=Homo sapiens OX=9606 GN=IGF2R PE=1 SV=3
271,TRUE,Q14118	DAG1_HUMAN,246.07372,13,4971.332,1407.2218,1252.5322,2754.5022,5419.177,5635.2754,13000.746,15310.34,13,10,9,8,10,9,18,24,21,Oxidation (M),97441.484,Dystroglycan OS=Homo sapiens OX=9606 GN=DAG1 PE=1 SV=2
100,TRUE,P13010	XRCC5_HUMAN,327.09314,30,11535.75,7007.4346,7827.877,21861.293,10492.005,10475.183,27344.795,27883.582,30,27,23,26,44,27,30,42,44,Oxidation (M); Carbamidomethylation,82704.54,X-ray repair cross-complementing protein 5 OS=Homo sapiens OX=9606 GN=XRCC5 PE=1 SV=3
499,TRUE,O43572	AKA10_HUMAN,167.3277,7,,,,178.51605,388.73853,193.229,1298.9846,858.1094,7,1,,,4,4,4,8,11,Oxidation (M),73818.18,"A-kinase anchor protein 10, mitochondrial OS=Homo sapiens OX=9606 GN=AKAP10 PE=1 SV=2"
171,TRUE,P54289	CA2D1_HUMAN,303.02286,21,4315.5303,2353.5374,1271.5076,4813.2266,1391.0352,1434.9937,4894.865,2345.8066,21,17,16,9,19,14,16,29,22,Oxidation (M),124568.03,Voltage-dependent calcium channel subunit alpha-2/delta-1 OS=Homo sapiens OX=9606 GN=CACNA2D1 PE=1 SV=3
483,TRUE,Q15223	NECT1_HUMAN,185.3653,7,9609.359,5660.3164,3210.3796,6935.6294,4167.5986,4381.6855,6440.957,9107.382,7,11,11,7,11,7,13,8,8,Oxidation (M),57158.17,Nectin-1 OS=Homo sapiens OX=9606 GN=NECTIN1 PE=1 SV=3
227,TRUE,P20340	RAB6A_HUMAN,258.9101,14,83822.836,61331.61,38771.6,63836.094,14869.76,15641.594,24513.809,23842.03,13,50,46,35,43,30,27,38,26,Oxidation (M); Acetylation (N-term),23592.775,Ras-related protein Rab-6A OS=Homo sapiens OX=9606 GN=RAB6A PE=1 SV=3
497,TRUE,P61006	RAB8A_HUMAN,221.3121,9,7363.5156,6960.83,2128.2703,8904.949,3297.1926,2750.7798,3530.7217,8556.6,7,22,24,21,26,12,11,22,18,,23668.2,Ras-related protein Rab-8A OS=Homo sapiens OX=9606 GN=RAB8A PE=1 SV=1
703,TRUE,Q9Y639	NPTN_HUMAN,102.26329,4,1166.7362,1959.4143,1777.0029,2202.395,963.1176,1171.8306,,1575.154,4,3,2,2,2,3,1,1,2,,44387.18,Neuroplastin OS=Homo sapiens OX=9606 GN=NPTN PE=1 SV=2
961,TRUE,Q6ZSZ5	ARHGI_HUMAN,74.74594,2,,,,,,,280.23853,355.18616,2,,,,,,,2,2,,151642.5,Rho guanine nucleotide exchange factor 18 OS=Homo sapiens OX=9606 GN=ARHGEF18 PE=1 SV=4
638,TRUE,O95208	EPN2_HUMAN,176.06105,6,1427.4797,760.30835,365.29495,915.739,,,154.03258,,4,9,7,6,8,1,1,5,2,,68481.62,Epsin-2 OS=Homo sapiens OX=9606 GN=EPN2 PE=1 SV=3
693,TRUE,O14975	S27A2_HUMAN,112.544395,5,544.9135,,,182.7107,,,,,5,6,1,,4,,,,,,70312.305,Very long-chain acyl-CoA synthetase OS=Homo sapiens OX=9606 GN=SLC27A2 PE=1 SV=2
561,TRUE,Q13325	IFIT5_HUMAN,180.4903,7,,122.5125,234.09787,,132.52142,867.9971,329.9855,643.425,7,1,1,3,2,4,4,8,7,,55846.746,Interferon-induced protein with tetratricopeptide repeats 5 OS=Homo sapiens OX=9606 GN=IFIT5 PE=1 SV=1
604,TRUE,O75487	GPC4_HUMAN,187.60378,6,341.05887,141.02441,,74.08856,,171.02762,511.0392,1092.5312,3,5,3,3,3,3,2,8,7,,62412.098,Glypican-4 OS=Homo sapiens OX=9606 GN=GPC4 PE=1 SV=4
967,TRUE,Q9UHG3	PCYOX_HUMAN,57.43933,2,313.14236,,,,,,,,2,1,,,1,,,,,Oxidation (M); Carbamidomethylation,56640.133,Prenylcysteine oxidase 1 OS=Homo sapiens OX=9606 GN=PCYOX1 PE=1 SV=3
695,TRUE,O00186	STXB3_HUMAN,118.47794,4,,186.80418,,722.1566,166.09273,,,94.44621,4,1,4,,5,2,,2,1,Oxidation (M),67764.27,Syntaxin-binding protein 3 OS=Homo sapiens OX=9606 GN=STXBP3 PE=1 SV=2
807,TRUE,Q04941	PLP2_HUMAN,86.02239,3,233.5134,4199.7847,426.42252,953.74066,,6410.9604,5575.1475,228.89526,3,3,3,1,2,,3,1,1,,16690.73,Proteolipid protein 2 OS=Homo sapiens OX=9606 GN=PLP2 PE=1 SV=1
242,TRUE,Q9UGT4	SUSD2_HUMAN,313.3837,17,50222.4,39883.312,27056.914,44569.215,44159.812,48264.266,68382.98,77218.43,17,48,37,29,46,40,35,48,48,Oxidation (M); Carbamidomethylation,90207.664,Sushi domain-containing protein 2 OS=Homo sapiens OX=9606 GN=SUSD2 PE=1 SV=1
405,FALSE,Q8WVV5	BT2A2_HUMAN,158.04276,4,2140.5557,,,2004.8469,1308.1136,1773.702,464.79462,128.64285,4,2,1,1,3,1,2,4,4,Oxidation (M),59070.242,Butyrophilin subfamily 2 member A2 OS=Homo sapiens OX=9606 GN=BTN2A2 PE=1 SV=2
862,TRUE,Q9NPQ8	RIC8A_HUMAN,128.2355,3,,,,,,,84.986015,66.47207,3,,,,,,,2,1,,59709.508,Synembryn-A OS=Homo sapiens OX=9606 GN=RIC8A PE=1 SV=3
438,TRUE,O15427	MOT4_HUMAN,230.25888,10,192623.47,136647.58,97579.5,157000.73,128306.945,144717.22,171332.22,205808.14,10,32,35,34,32,26,26,37,33,,49469.38,Monocarboxylate transporter 4 OS=Homo sapiens OX=9606 GN=SLC16A3 PE=1 SV=1
520,TRUE,P46109	CRKL_HUMAN,186.93068,7,333.292,,,544.27765,3995.4644,3485.0322,3892.3145,5245.626,7,3,1,1,4,6,9,7,10,Oxidation (M),33776.984,Crk-like protein OS=Homo sapiens OX=9606 GN=CRKL PE=1 SV=1
286,TRUE,P84077	ARF1_HUMAN,246.80984,10,19990.09,18146.578,20332.37,36663.797,25857.809,29415.248,48490.383,40909.05,6,25,32,38,41,37,38,47,41,Oxidation (M),20696.764,ADP-ribosylation factor 1 OS=Homo sapiens OX=9606 GN=ARF1 PE=1 SV=2
763,TRUE,Q96FQ6	S10AG_HUMAN,145.2777,4,1261.6204,740.438,974.07526,1776.7087,1189.5574,1642.727,2139.6953,2610.4023,4,5,5,6,7,5,5,9,8,,11801.392,Protein S100-A16 OS=Homo sapiens OX=9606 GN=S100A16 PE=1 SV=1
326,TRUE,O43278	SPIT1_HUMAN,219.96611,13,26615.32,29632.883,15351.652,23432.031,20276.734,21440.785,21755.91,31937.879,13,23,28,13,20,16,19,17,22,Carbamidomethylation; Oxidation (M),58398.008,Kunitz-type protease inhibitor 1 OS=Homo sapiens OX=9606 GN=SPINT1 PE=1 SV=2
218,TRUE,Q92888	ARHG1_HUMAN,281.21695,19,,,264.7353,870.84595,2841.1748,2610.8123,6294.34,6287.024,19,,,1,9,19,21,23,24,Oxidation (M),102435.3,Rho guanine nucleotide exchange factor 1 OS=Homo sapiens OX=9606 GN=ARHGEF1 PE=1 SV=2
343,FALSE,Q01484	ANK2_HUMAN,84.88794,3,,,,,,141.75964,,,3,,,,,,1,1,2,,433714.66,Ankyrin-2 OS=Homo sapiens OX=9606 GN=ANK2 PE=1 SV=4
680,TRUE,Q04771	ACVR1_HUMAN,135.99533,4,848.40137,1466.6477,627.6208,1052.117,1483.0017,1217.8834,2243.709,2966.103,4,2,4,4,2,3,3,4,5,Oxidation (M),57152.848,Activin receptor type-1 OS=Homo sapiens OX=9606 GN=ACVR1 PE=1 SV=1
774,TRUE,Q15691	MARE1_HUMAN,144.69308,4,,,,387.10693,,,318.6589,550.57355,4,,,2,6,2,1,3,6,Carbamidomethylation,29999.076,Microtubule-associated protein RP/EB family member 1 OS=Homo sapiens OX=9606 GN=MAPRE1 PE=1 SV=3
217,TRUE,Q8NC51	PAIRB_HUMAN,313.90936,17,4003.8696,1976.428,1620.7554,6060.518,25752.879,24744.19,32485.953,38986.402,17,20,20,18,27,37,35,36,40,Oxidation (M),44965.383,Plasminogen activator inhibitor 1 RNA-binding protein OS=Homo sapiens OX=9606 GN=SERBP1 PE=1 SV=2
861,TRUE,O75251	NDUS7_HUMAN,111.98442,3,145.92618,,,,75.01639,,905.8884,1291.0782,3,1,,,,2,1,3,3,,23563.504,"NADH dehydrogenase [ubiquinone] iron-sulfur protein 7, mitochondrial OS=Homo sapiens OX=9606 GN=NDUFS7 PE=1 SV=3"
458,TRUE,Q8NI77	KI18A_HUMAN,151.62657,8,242.55826,,,,90.59936,264.42334,1273.7142,2534.0278,8,2,,,,2,2,3,9,Oxidation (M),102280.99,Kinesin-like protein KIF18A OS=Homo sapiens OX=9606 GN=KIF18A PE=1 SV=2
321,TRUE,P22681	CBL_HUMAN,217.55049,13,,,201.3908,1162.4629,2559.6147,3200.311,4502.6494,4737.878,13,,3,6,8,11,12,12,14,Oxidation (M),99632.78,E3 ubiquitin-protein ligase CBL OS=Homo sapiens OX=9606 GN=CBL PE=1 SV=2
908,TRUE,Q9NRD5	PICK1_HUMAN,84.47789,2,,,,,,,,,2,,,,,1,,,1,Oxidation (M),46600.1,PRKCA-binding protein OS=Homo sapiens OX=9606 GN=PICK1 PE=1 SV=2
164,TRUE,P20020	AT2B1_HUMAN,290.5817,21,2181.2058,1423.6176,619.73987,2014.3245,982.2653,696.93964,1580.7969,2307.298,11,18,16,9,19,10,13,14,19,Oxidation (M),134684.77,Plasma membrane calcium-transporting ATPase 1 OS=Homo sapiens OX=9606 GN=ATP2B1 PE=1 SV=4
931,TRUE,Q96NE9	FRMD6_HUMAN,125.7556,2,,,,,,,,,2,,,,,1,,,3,,72043.94,FERM domain-containing protein 6 OS=Homo sapiens OX=9606 GN=FRMD6 PE=1 SV=1
716,TRUE,Q9UGH3	S23A2_HUMAN,133.77203,4,436.31897,83.12053,,,,81.39769,,231.75137,4,2,3,2,3,1,2,2,6,,70336.984,Solute carrier family 23 member 2 OS=Homo sapiens OX=9606 GN=SLC23A2 PE=1 SV=1
136,TRUE,Q9Y446	PKP3_HUMAN,326.11227,27,25284.133,7143.4385,8739.161,11415.646,20503.44,10098.289,22835.848,31566.105,27,28,20,24,26,27,29,35,40,Oxidation (M); Carbamidomethylation,87082.15,Plakophilin-3 OS=Homo sapiens OX=9606 GN=PKP3 PE=1 SV=1
843,TRUE,Q9UHQ9	NB5R1_HUMAN,105.047356,3,,96.944305,,186.40704,,,,,3,5,2,3,3,,,,,,34094.84,NADH-cytochrome b5 reductase 1 OS=Homo sapiens OX=9606 GN=CYB5R1 PE=1 SV=1
957,TRUE,Q99996	AKAP9_HUMAN,64.56123,2,,,,,,,,,2,,,,,,,2,,,452987.2,A-kinase anchor protein 9 OS=Homo sapiens OX=9606 GN=AKAP9 PE=1 SV=4
700,TRUE,Q13433	S39A6_HUMAN,140.52379,4,3512.6277,2386.1106,1232.8032,2835.8416,2715.0764,2710.6904,3373.0608,4009.7825,4,5,6,4,5,5,4,5,5,,85046.79,Zinc transporter ZIP6 OS=Homo sapiens OX=9606 GN=SLC39A6 PE=1 SV=3
629,TRUE,Q9UJZ1	STML2_HUMAN,167.93915,6,,,,,317.99603,143.33301,179.05713,213.5787,6,1,,,2,8,8,5,4,,38534.062,"Stomatin-like protein 2, mitochondrial OS=Homo sapiens OX=9606 GN=STOML2 PE=1 SV=1"
497,FALSE,Q92930	RAB8B_HUMAN,165.96783,6,5146.6606,3579.454,529.40784,4274.95,1465.465,1851.5239,2214.433,3397.6904,4,20,17,16,19,10,9,19,13,,23584.09,Ras-related protein Rab-8B OS=Homo sapiens OX=9606 GN=RAB8B PE=1 SV=2
941,TRUE,Q9HAU4	SMUF2_HUMAN,77.175804,2,,,,,,,,,2,,,,,2,1,1,1,,86195.79,E3 ubiquitin-protein ligase SMURF2 OS=Homo sapiens OX=9606 GN=SMURF2 PE=1 SV=1
94,TRUE,P29323	EPHB2_HUMAN,373.77786,28,24696.074,18616.695,8856.565,15833.36,17113.982,20222.523,27672.861,36502.43,23,55,49,39,48,46,51,51,56,Oxidation (M); Carbamidomethylation,117492.664,Ephrin type-B receptor 2 OS=Homo sapiens OX=9606 GN=EPHB2 PE=1 SV=5
28,TRUE,P53396	ACLY_HUMAN,415.96066,47,18577.992,7896.5317,6055.48,19348.951,75869.9,91709.805,84050.61,109885.48,47,45,36,40,58,107,106,107,112,Oxidation (M); Carbamidomethylation,120839.22,ATP-citrate synthase OS=Homo sapiens OX=9606 GN=ACLY PE=1 SV=3
141,TRUE,P43490	NAMPT_HUMAN,356.27908,26,25116.447,13995.572,9748.314,22921.9,31822.44,39986.734,59085.844,52991.504,26,40,40,40,44,45,55,61,44,Oxidation (M); Acetylation (N-term); Carbamidomethylation,55521.156,Nicotinamide phosphoribosyltransferase OS=Homo sapiens OX=9606 GN=NAMPT PE=1 SV=1
263,TRUE,Q9Y5X1	SNX9_HUMAN,303.10187,16,3828.973,2923.3918,2187.3105,4295.8213,10271.052,9143.445,13312.831,15680.771,16,9,8,8,12,14,19,26,23,Carbamidomethylation,66591.65,Sorting nexin-9 OS=Homo sapiens OX=9606 GN=SNX9 PE=1 SV=1
510,TRUE,Q9BXS5	AP1M1_HUMAN,165.20494,8,395.48465,,,466.29507,,,474.98337,271.27417,8,6,2,4,5,3,1,11,8,,48586.895,AP-1 complex subunit mu-1 OS=Homo sapiens OX=9606 GN=AP1M1 PE=1 SV=3
352,TRUE,P39656	OST48_HUMAN,247.0149,13,8819.25,5658.403,2973.6433,7274.7573,79.48633,,1013.2498,950.6112,13,14,11,12,18,2,1,5,6,Carbamidomethylation; Oxidation (M),50800.83,Dolichyl-diphosphooligosaccharide--protein glycosyltransferase 48 kDa subunit OS=Homo sapiens OX=9606 GN=DDOST PE=1 SV=4
41,FALSE,P13637	AT1A3_HUMAN,314.1552,15,86957.555,71652.664,44970.656,68746.734,70251.45,101844.32,31896.037,83431.56,8,51,50,55,52,50,39,44,43,Oxidation (M); Carbamidomethylation,111748.54,Sodium/potassium-transporting ATPase subunit alpha-3 OS=Homo sapiens OX=9606 GN=ATP1A3 PE=1 SV=3
686,TRUE,Q9Y5Y0	FLVC1_HUMAN,157.54051,5,416.98712,,,306.5564,,,114.96409,552.87506,5,4,1,2,4,1,,2,2,,59862.887,Feline leukemia virus subgroup C receptor-related protein 1 OS=Homo sapiens OX=9606 GN=FLVCR1 PE=1 SV=1
449,FALSE,A6NIZ1	RP1BL_HUMAN,187.25343,6,649.40515,368.63165,,873.3009,219.03693,189.82475,,1361.7273,4,8,5,9,7,3,3,7,6,Carbamidomethylation; Oxidation (M),20924.86,Ras-related protein Rap-1b-like protein OS=Homo sapiens OX=9606 PE=2 SV=1
744,TRUE,P31431	SDC4_HUMAN,101.99186,4,227.2125,222.2714,,367.70868,164.19473,,142.51764,474.90723,4,7,5,2,7,1,4,5,4,,21641.555,Syndecan-4 OS=Homo sapiens OX=9606 GN=SDC4 PE=1 SV=2
3,TRUE,Q9NZM1	MYOF_HUMAN,553.0118,136,903536.6,656504.8,451490.25,766418.7,371970.06,434371.28,578520.5,672011.25,136,431,385,342,436,293,310,333,360,Carbamidomethylation; Oxidation (M),234708.72,Myoferlin OS=Homo sapiens OX=9606 GN=MYOF PE=1 SV=1
766,TRUE,P09758	TACD2_HUMAN,170.68797,4,1926.4591,1426.2959,750.2511,1819.9932,1000.4338,1093.4888,2144.0273,2506.7988,4,3,4,2,4,2,1,5,3,,35709.39,Tumor-associated calcium signal transducer 2 OS=Homo sapiens OX=9606 GN=TACSTD2 PE=1 SV=3
772,TRUE,Q9HBH0	RHOF_HUMAN,183.49664,4,2365.835,358.75153,263.58234,1695.3501,553.11273,1198.0171,2112.1765,2819.7007,4,6,4,8,5,5,5,7,5,Carbamidomethylation,23625.441,Rho-related GTP-binding protein RhoF OS=Homo sapiens OX=9606 GN=RHOF PE=1 SV=1
982,TRUE,O00273	DFFA_HUMAN,92.17917,2,,,,339.90744,266.9543,174.80254,,562.9369,2,,,,2,1,1,,2,,36521.906,DNA fragmentation factor subunit alpha OS=Homo sapiens OX=9606 GN=DFFA PE=1 SV=1
845,TRUE,Q8WWY8	LIPH_HUMAN,99.30528,3,,169.3577,,,,156.90817,369.9195,615.83057,3,1,3,,,1,2,1,3,,50859.332,Lipase member H OS=Homo sapiens OX=9606 GN=LIPH PE=1 SV=1
704,TRUE,O95361	TRI16_HUMAN,126.22188,4,,,,,,,278.9764,255.33081,4,,,,,,1,3,5,,63955.16,Tripartite motif-containing protein 16 OS=Homo sapiens OX=9606 GN=TRIM16 PE=1 SV=3
405,TRUE,Q7KYR7	BT2A1_HUMAN,226.3583,9,3086.9282,921.53284,127.585144,2898.5562,2112.3755,3378.1074,2384.2952,3033.1477,9,7,7,4,7,7,9,10,10,Carbamidomethylation; Oxidation (M),59632.56,Butyrophilin subfamily 2 member A1 OS=Homo sapiens OX=9606 GN=BTN2A1 PE=1 SV=3
530,TRUE,P49757	NUMB_HUMAN,158.6108,7,2004.119,1796.1813,,564.1011,505.07904,509.03235,1624.5847,3312.653,7,8,2,1,4,7,5,15,14,Oxidation (M),70803.8,Protein numb homolog OS=Homo sapiens OX=9606 GN=NUMB PE=1 SV=2
334,TRUE,P84085	ARF5_HUMAN,220.25696,9,1288.4021,728.1122,961.7661,2488.8853,1651.4886,1903.4468,3212.579,2501.523,5,13,17,25,23,23,24,29,25,Oxidation (M); Carbamidomethylation,20529.65,ADP-ribosylation factor 5 OS=Homo sapiens OX=9606 GN=ARF5 PE=1 SV=2
81,TRUE,O43795	MYO1B_HUMAN,354.88797,37,22670.432,14416.194,10990.395,22655.777,16252.328,20723.645,34396.543,37120.35,34,49,40,41,59,47,46,50,57,Oxidation (M); Carbamidomethylation,131985.03,Unconventional myosin-Ib OS=Homo sapiens OX=9606 GN=MYO1B PE=1 SV=3
1009,TRUE,Q9H1C7	CYTM1_HUMAN,83.64886,2,2046.7687,1145.9198,447.8524,1113.4529,837.3437,937.08954,1710.1746,,2,2,1,1,2,2,2,2,1,,10631.036,Cysteine-rich and transmembrane domain-containing protein 1 OS=Homo sapiens OX=9606 GN=CYSTM1 PE=1 SV=1
690,TRUE,P36894	BMR1A_HUMAN,206.75597,5,491.6191,202.01273,,213.78618,191.63269,276.86584,756.6745,432.6671,5,5,2,3,3,3,4,7,9,,60197.496,Bone morphogenetic protein receptor type-1A OS=Homo sapiens OX=9606 GN=BMPR1A PE=1 SV=2
612,TRUE,Q9ULH1	ASAP1_HUMAN,153.64081,6,,,,,,,159.24667,510.33026,5,,,1,2,2,5,3,8,,125498.02,"Arf-GAP with SH3 domain, ANK repeat and PH domain-containing protein 1 OS=Homo sapiens OX=9606 GN=ASAP1 PE=1 SV=4"
850,TRUE,Q14232	EI2BA_HUMAN,98.75133,3,,,,,,,,216.78873,3,,,,,1,1,1,2,,33712.2,Translation initiation factor eIF-2B subunit alpha OS=Homo sapiens OX=9606 GN=EIF2B1 PE=1 SV=1
707,TRUE,Q9UP95	S12A4_HUMAN,118.14338,4,333.8038,119.57446,64.26512,239.36127,,,151.36397,532.2357,4,3,1,1,4,1,2,1,4,,120649.88,Solute carrier family 12 member 4 OS=Homo sapiens OX=9606 GN=SLC12A4 PE=1 SV=2
147,FALSE,Q15700	DLG2_HUMAN,135.57834,4,1013.05145,80.768936,,,104.61391,,324.17078,685.859,4,4,5,2,4,2,1,2,1,Carbamidomethylation,97552.27,Disks large homolog 2 OS=Homo sapiens OX=9606 GN=DLG2 PE=1 SV=3
178,TRUE,Q12965	MYO1E_HUMAN,269.1976,22,638.0438,435.93738,,,1632.4238,2182.0317,5564.0493,7843.9604,22,5,4,3,2,10,13,20,26,Oxidation (M),127061.89,Unconventional myosin-Ie OS=Homo sapiens OX=9606 GN=MYO1E PE=1 SV=2
213,TRUE,Q00325	MPCP_HUMAN,229.9972,11,82572.17,61596.277,48092.87,68021.65,18747.62,16966.984,40084.027,42715.46,11,37,27,33,34,31,22,24,26,Oxidation (M),40094.86,"Phosphate carrier protein, mitochondrial OS=Homo sapiens OX=9606 GN=SLC25A3 PE=1 SV=2"
925,TRUE,Q9UBI6	GBG12_HUMAN,93.545715,2,483.62482,284.4224,,487.4452,,,,81.35922,2,1,1,1,3,,,,2,Oxidation (M); Carbamidomethylation,8006.2163,Guanine nucleotide-binding protein G(I)/G(S)/G(O) subunit gamma-12 OS=Homo sapiens OX=9606 GN=GNG12 PE=1 SV=3
150,TRUE,P07384	CAN1_HUMAN,314.53003,21,3596.8918,2087.0603,10007.906,23135.822,10432.072,18505.83,35286.51,39236.664,21,11,11,30,36,25,26,39,34,Oxidation (M); Carbamidomethylation,81890.05,Calpain-1 catalytic subunit OS=Homo sapiens OX=9606 GN=CAPN1 PE=1 SV=1
142,TRUE,Q15046	SYK_HUMAN,300.7621,23,11178.253,6995.4116,1290.1681,8755.631,14733.208,14224.846,25391.078,28582.05,23,24,18,18,26,31,31,37,29,Carbamidomethylation; Oxidation (M),68048.06,Lysine--tRNA ligase OS=Homo sapiens OX=9606 GN=KARS1 PE=1 SV=3
396,TRUE,Q9UBB4	ATX10_HUMAN,203.69029,10,,,68.05741,108.01954,999.2888,988.759,910.74963,1775.3497,10,3,2,2,6,7,9,10,13,Oxidation (M),53488.746,Ataxin-10 OS=Homo sapiens OX=9606 GN=ATXN10 PE=1 SV=1
666,TRUE,Q9H9H4	VP37B_HUMAN,156.49483,4,,,,,248.26048,296.86597,407.9176,394.6156,4,1,1,2,3,6,3,5,4,Oxidation (M),31307.205,Vacuolar protein sorting-associated protein 37B OS=Homo sapiens OX=9606 GN=VPS37B PE=1 SV=1
59,TRUE,P55196	AFAD_HUMAN,349.76767,40,8008.3457,4229.6274,2211.9653,5067.489,7803.6055,8811.344,9726.078,14209.913,40,35,30,20,29,39,48,45,45,Oxidation (M),206804.22,Afadin OS=Homo sapiens OX=9606 GN=AFDN PE=1 SV=3
369,TRUE,P09543	CN37_HUMAN,244.39526,12,1620.271,702.3011,855.68414,4415.8896,1947.3741,3305.7263,5228.8804,7630.8535,12,7,4,11,13,13,14,17,17,,47578.625,"2',3'-cyclic-nucleotide 3'-phosphodiesterase OS=Homo sapiens OX=9606 GN=CNP PE=1 SV=2"
615,TRUE,Q9Y3S1	WNK2_HUMAN,130.16174,5,453.89288,,542.402,533.76373,4628.9424,4528.781,3958.7556,4492.0464,5,2,1,3,5,8,5,8,7,Oxidation (M),242676.1,Serine/threonine-protein kinase WNK2 OS=Homo sapiens OX=9606 GN=WNK2 PE=1 SV=4
835,TRUE,P22676	CALB2_HUMAN,105.5895,3,,,192.90796,755.26526,,224.2397,1043.1677,886.9223,3,,,3,3,,1,4,2,,31539.863,Calretinin OS=Homo sapiens OX=9606 GN=CALB2 PE=2 SV=2
479,TRUE,P50748	KNTC1_HUMAN,204.09607,9,,,,,338.83566,860.1841,747.12646,1217.2329,9,,,,,4,8,10,9,Carbamidomethylation,250748.53,Kinetochore-associated protein 1 OS=Homo sapiens OX=9606 GN=KNTC1 PE=1 SV=1
272,TRUE,P26038	MOES_HUMAN,233.75237,13,,,,,,,,333.98877,5,15,12,15,22,11,13,23,23,Oxidation (M),67820.04,Moesin OS=Homo sapiens OX=9606 GN=MSN PE=1 SV=3
190,TRUE,Q12929	EPS8_HUMAN,309.0133,19,1668.3171,1404.4023,505.3831,2323.548,1626.9469,2204.348,4577.9766,6734.8477,19,14,12,10,21,17,17,18,23,Oxidation (M),91881.516,Epidermal growth factor receptor kinase substrate 8 OS=Homo sapiens OX=9606 GN=EPS8 PE=1 SV=1
733,TRUE,Q9H490	PIGU_HUMAN,171.07217,4,4092.6572,3222.4146,1530.923,3132.7708,604.44556,731.027,689.2386,1167.7128,4,6,5,5,7,6,2,4,5,Oxidation (M),50051.812,Phosphatidylinositol glycan anchor biosynthesis class U protein OS=Homo sapiens OX=9606 GN=PIGU PE=1 SV=3
846,TRUE,Q9UN37	VPS4A_HUMAN,101.55871,3,,,,135.49521,,,161.08176,,3,,,,1,,1,1,1,Oxidation (M),48897.87,Vacuolar protein sorting-associated protein 4A OS=Homo sapiens OX=9606 GN=VPS4A PE=1 SV=1
652,TRUE,Q07021	C1QBP_HUMAN,158.79091,5,2313.4075,1191.7324,1028.7179,1645.2045,1421.2793,1293.9788,1535.9368,2206.4275,5,3,3,5,4,5,3,5,3,Oxidation (M),31362.236,"Complement component 1 Q subcomponent-binding protein, mitochondrial OS=Homo sapiens OX=9606 GN=C1QBP PE=1 SV=1"
320,TRUE,P61026	RAB10_HUMAN,264.89798,13,17142.834,13066.729,10631.263,17785.57,6285.338,7477.7153,10495.372,16069.897,10,33,29,26,32,16,22,29,31,Oxidation (M),22540.928,Ras-related protein Rab-10 OS=Homo sapiens OX=9606 GN=RAB10 PE=1 SV=1
790,TRUE,O43663	PRC1_HUMAN,119.521736,3,,,,,,,,468.13855,3,,,,,,,1,4,,71606.58,Protein regulator of cytokinesis 1 OS=Homo sapiens OX=9606 GN=PRC1 PE=1 SV=2
614,TRUE,P52429	DGKE_HUMAN,160.0852,5,3846.3218,1943.5164,1062.3777,2160.6738,1219.2998,1732.8002,2319.933,3672.5723,5,8,3,7,6,3,5,4,7,Oxidation (M),63927.047,Diacylglycerol kinase epsilon OS=Homo sapiens OX=9606 GN=DGKE PE=1 SV=1
969,TRUE,P50443	S26A2_HUMAN,115.09026,2,,,,,,,,,2,,,,,,,2,,,81661.5,Sulfate transporter OS=Homo sapiens OX=9606 GN=SLC26A2 PE=1 SV=2
260,TRUE,Q9Y6G9	DC1L1_HUMAN,258.5275,16,661.306,154.55136,171.35965,1897.5886,3175.6804,3845.9597,5331.0303,7316.646,16,4,1,4,10,14,15,18,16,,56579.137,Cytoplasmic dynein 1 light intermediate chain 1 OS=Homo sapiens OX=9606 GN=DYNC1LI1 PE=1 SV=3
591,TRUE,Q02750	MP2K1_HUMAN,167.61388,7,,,,228.1695,,,976.92377,3138.7417,6,,,2,2,4,1,6,7,Acetylation (N-term),43439.008,Dual specificity mitogen-activated protein kinase kinase 1 OS=Homo sapiens OX=9606 GN=MAP2K1 PE=1 SV=2
467,TRUE,P51151	RAB9A_HUMAN,208.04831,9,1484.0359,1099.0735,946.3811,2228.2217,1135.3264,1588.8756,2147.7983,3763.7632,7,8,10,6,7,7,7,9,11,Carbamidomethylation,22837.578,Ras-related protein Rab-9A OS=Homo sapiens OX=9606 GN=RAB9A PE=1 SV=1
158,TRUE,Q9H223	EHD4_HUMAN,281.152,20,4212.8857,2989.9412,3119.3867,6963.937,12456.201,11774.266,20161.031,21296.994,15,15,12,24,22,31,33,33,32,Oxidation (M),61175.125,EH domain-containing protein 4 OS=Homo sapiens OX=9606 GN=EHD4 PE=1 SV=1
372,TRUE,Q14BN4	SLMAP_HUMAN,196.0097,11,2496.6191,1056.9575,89.60016,1585.3632,,549.34564,934.3386,1302.0565,11,10,8,7,6,3,6,7,8,Oxidation (M),95198.3,Sarcolemmal membrane-associated protein OS=Homo sapiens OX=9606 GN=SLMAP PE=1 SV=1
86,TRUE,P27824	CALX_HUMAN,425.83307,36,478912.22,368168.78,292838.25,483475.53,53801.746,59195.777,89007.375,101653.6,36,158,150,133,157,55,47,68,72,Oxidation (M),67568.3,Calnexin OS=Homo sapiens OX=9606 GN=CANX PE=1 SV=2
618,TRUE,P29992	GNA11_HUMAN,143.67426,5,625.7389,176.69435,354.08545,520.3041,,,,,3,3,3,4,6,,,,5,Oxidation (M),42123.33,Guanine nucleotide-binding protein subunit alpha-11 OS=Homo sapiens OX=9606 GN=GNA11 PE=1 SV=2
74,TRUE,Q00341	VIGLN_HUMAN,342.83447,38,41674.887,29448.516,16586.416,32683.383,9978.267,15320.096,47151.27,58939.41,38,14,12,18,35,45,31,55,54,Oxidation (M); Acetylation (N-term),141455.64,Vigilin OS=Homo sapiens OX=9606 GN=HDLBP PE=1 SV=2
368,TRUE,Q93100	KPBB_HUMAN,183.2939,12,,,,,,289.513,575.4674,522.66016,12,1,,,,6,8,6,9,,124884.36,Phosphorylase b kinase regulatory subunit beta OS=Homo sapiens OX=9606 GN=PHKB PE=1 SV=3
689,TRUE,O15111	IKKA_HUMAN,136.2231,5,,,,,,699.3422,235.56802,176.53488,5,,,,,3,6,4,5,,84639.58,Inhibitor of nuclear factor kappa-B kinase subunit alpha OS=Homo sapiens OX=9606 GN=CHUK PE=1 SV=2
18,TRUE,O60437	PEPL_HUMAN,404.55054,80,44564.88,26697.924,10559.205,24535.947,12283.288,12660.372,22255.738,30863.592,79,116,107,70,90,64,57,80,100,Oxidation (M); Carbamidomethylation,204746.83,Periplakin OS=Homo sapiens OX=9606 GN=PPL PE=1 SV=4
907,TRUE,Q6UB99	ANR11_HUMAN,96.54812,2,,,,,,,,,2,1,,1,,2,1,5,4,,297913.38,Ankyrin repeat domain-containing protein 11 OS=Homo sapiens OX=9606 GN=ANKRD11 PE=1 SV=3
198,TRUE,Q7L1W4	LRC8D_HUMAN,292.18884,21,8591.471,4508.2275,1921.8988,6356.912,3825.1147,4756.1265,6538.0986,8582.613,20,21,24,18,19,21,23,21,18,Carbamidomethylation; Oxidation (M); Acetylation (N-term),98201.4,Volume-regulated anion channel subunit LRRC8D OS=Homo sapiens OX=9606 GN=LRRC8D PE=1 SV=1
186,TRUE,P17655	CAN2_HUMAN,254.8813,16,826.57355,131.75124,2173.9646,5731.3755,3191.9287,4259.2954,9219.725,9719.836,16,4,1,16,21,13,14,19,17,Oxidation (M); Carbamidomethylation,79995.35,Calpain-2 catalytic subunit OS=Homo sapiens OX=9606 GN=CAPN2 PE=1 SV=6
826,TRUE,Q8N4X5	AF1L2_HUMAN,129.8974,3,,,,,374.2712,679.2683,646.35474,1016.3139,3,,,,1,3,2,3,3,,91299.664,Actin filament-associated protein 1-like 2 OS=Homo sapiens OX=9606 GN=AFAP1L2 PE=1 SV=1
727,TRUE,P04156	PRIO_HUMAN,153.65771,4,9144.547,4954.3994,2408.1838,5665.1484,4873.3867,6359.931,7281.411,8953.114,4,10,10,8,8,10,10,6,9,,27661.162,Major prion protein OS=Homo sapiens OX=9606 GN=PRNP PE=1 SV=1
55,TRUE,O75691	UTP20_HUMAN,350.2366,47,3086.7961,2321.6736,522.67474,3538.6445,7820.628,9063.305,18288.092,27231.754,47,23,15,18,24,37,45,44,51,Oxidation (M),318385.4,Small subunit processome component 20 homolog OS=Homo sapiens OX=9606 GN=UTP20 PE=1 SV=3
570,TRUE,P84095	RHOG_HUMAN,198.36513,7,930.0169,676.1861,623.92676,1430.7498,532.7137,1121.8309,2308.0532,3106.4587,6,5,4,10,6,6,6,6,8,Carbamidomethylation,21308.5,Rho-related GTP-binding protein RhoG OS=Homo sapiens OX=9606 GN=RHOG PE=1 SV=1
409,TRUE,Q8IZH2	XRN1_HUMAN,180.40659,11,,,,167.0664,512.47943,401.17004,653.85706,2569.9612,11,,,,2,3,5,9,13,,194107.28,5'-3' exoribonuclease 1 OS=Homo sapiens OX=9606 GN=XRN1 PE=1 SV=1
642,TRUE,Q9H9J2	RM44_HUMAN,144.55159,5,,,,,,,851.3151,1236.0327,5,2,,,,1,,4,5,,37535.37,"39S ribosomal protein L44, mitochondrial OS=Homo sapiens OX=9606 GN=MRPL44 PE=1 SV=1"
390,TRUE,P62140	PP1B_HUMAN,269.0095,11,352.47723,211.86899,220.76761,770.7977,671.2102,710.052,1936.3638,2608.0596,3,11,10,11,15,13,9,11,17,Carbamidomethylation; Oxidation (M),37186.83,Serine/threonine-protein phosphatase PP1-beta catalytic subunit OS=Homo sapiens OX=9606 GN=PPP1CB PE=1 SV=3
412,TRUE,P05026	AT1B1_HUMAN,263.65054,11,37768.684,22999.879,19728.027,26907.867,22057.766,18821.309,23978.217,27729.1,11,19,23,19,29,19,16,23,19,Oxidation (M); Carbamidomethylation,35061.3,Sodium/potassium-transporting ATPase subunit beta-1 OS=Homo sapiens OX=9606 GN=ATP1B1 PE=1 SV=1
702,TRUE,P07602	SAP_HUMAN,153.39793,4,,326.20886,105.07448,304.22327,1022.2426,1463.2391,,320.43597,4,4,4,2,3,3,3,4,3,Oxidation (M),58112.637,Prosaposin OS=Homo sapiens OX=9606 GN=PSAP PE=1 SV=2
282,TRUE,P20339	RAB5A_HUMAN,235.43779,10,8501.742,5391.9365,3627.9563,9171.648,2580.4238,3429.6323,4902.3096,8413.979,7,24,26,23,27,25,16,17,16,Oxidation (M),23658.678,Ras-related protein Rab-5A OS=Homo sapiens OX=9606 GN=RAB5A PE=1 SV=2
292,TRUE,Q93052	LPP_HUMAN,277.13046,12,2646.629,1226.969,775.7082,2364.335,8495.165,8170.9766,9505.925,13268.805,12,13,7,8,12,30,24,22,24,Oxidation (M); Carbamidomethylation,65746.33,Lipoma-preferred partner OS=Homo sapiens OX=9606 GN=LPP PE=1 SV=1
403,TRUE,Q9NPH3	IL1AP_HUMAN,210.79582,10,4539.1475,2257.3096,3107.0364,2459.667,1814.3193,2742.6047,4486.582,5246.389,10,14,12,11,9,6,13,13,16,Oxidation (M),65418.438,Interleukin-1 receptor accessory protein OS=Homo sapiens OX=9606 GN=IL1RAP PE=1 SV=2
705,FALSE,Q9UN67	PCDBA_HUMAN,105.98369,3,297.44473,,,176.94254,,,,520.02356,3,1,1,,1,,,,3,,87620.734,Protocadherin beta-10 OS=Homo sapiens OX=9606 GN=PCDHB10 PE=1 SV=1
230,TRUE,Q6NZI2	CAVN1_HUMAN,313.07672,14,44866.246,29791.47,19564.924,31464.102,30656.861,34960.527,35113.527,47635.2,14,42,42,40,38,40,46,39,45,Oxidation (M),43476.133,Caveolae-associated protein 1 OS=Homo sapiens OX=9606 GN=CAVIN1 PE=1 SV=1
447,TRUE,Q03135	CAV1_HUMAN,243.78168,9,69715.695,56240.023,31931.08,57959.03,48109.85,50794.055,71914.55,74894.586,9,34,27,28,29,32,31,34,31,Oxidation (M); Carbamidomethylation,20471.615,Caveolin-1 OS=Homo sapiens OX=9606 GN=CAV1 PE=1 SV=4
477,TRUE,Q96EP0	RNF31_HUMAN,209.54723,9,,,,,117.00812,298.88278,88.5119,721.3303,9,,,,,4,6,3,9,,119652.02,E3 ubiquitin-protein ligase RNF31 OS=Homo sapiens OX=9606 GN=RNF31 PE=1 SV=1
646,TRUE,P62987	RL40_HUMAN,188.32823,5,195193.3,145332.75,107518.73,163726.83,154516.27,159804.88,187127.61,214916.14,5,34,33,36,37,38,34,39,36,,14728.311,Ubiquitin-60S ribosomal protein L40 OS=Homo sapiens OX=9606 GN=UBA52 PE=1 SV=2
410,TRUE,Q8NBX0	SCPDL_HUMAN,212.12187,9,3673.0952,1070.4086,1978.2776,3854.848,,,213.87242,298.74805,9,10,10,8,14,1,,2,1,Oxidation (M),47151.375,Saccharopine dehydrogenase-like oxidoreductase OS=Homo sapiens OX=9606 GN=SCCPDH PE=1 SV=1
154,FALSE,Q05193	DYN1_HUMAN,135.8076,5,353.01746,290.68073,631.4442,1905.7329,1835.9277,1152.0492,2650.4456,4552.4277,5,2,2,4,5,3,4,4,5,Oxidation (M),97408.25,Dynamin-1 OS=Homo sapiens OX=9606 GN=DNM1 PE=1 SV=2
3,FALSE,O75923	DYSF_HUMAN,154.31485,5,26217.035,16181.234,12862.322,16314.62,9196.473,10781.7295,11582.523,10120.094,5,10,10,7,8,7,8,9,8,Oxidation (M),237294.95,Dysferlin OS=Homo sapiens OX=9606 GN=DYSF PE=1 SV=1
26,FALSE,O60486	PLXC1_HUMAN,74.34258,2,1416.1969,488.11545,403.33023,602.37866,519.7938,450.3371,587.1093,505.3691,2,3,3,2,3,1,1,1,2,,175742.03,Plexin-C1 OS=Homo sapiens OX=9606 GN=PLXNC1 PE=1 SV=1
639,TRUE,P49755	TMEDA_HUMAN,164.31116,5,3049.3003,1523.8843,203.02205,2604.586,,,114.06472,569.2561,5,7,8,5,11,,1,2,2,Oxidation (M),24975.967,Transmembrane emp24 domain-containing protein 10 OS=Homo sapiens OX=9606 GN=TMED10 PE=1 SV=2
38,TRUE,O95425	SVIL_HUMAN,395.30267,50,6501.6455,5523.1113,2374.8933,69829.36,103537.586,14327.789,146344.48,155634.34,50,40,39,25,41,53,54,65,69,Oxidation (M); Carbamidomethylation,247746.36,Supervillin OS=Homo sapiens OX=9606 GN=SVIL PE=1 SV=2
185,TRUE,Q92835	SHIP1_HUMAN,280.47296,20,,,,338.2075,2065.5913,2790.5767,3686.3167,7674.9526,17,2,,1,6,19,28,25,29,Oxidation (M); Carbamidomethylation,133292.47,"Phosphatidylinositol 3,4,5-trisphosphate 5-phosphatase 1 OS=Homo sapiens OX=9606 GN=INPP5D PE=1 SV=2"
814,TRUE,Q8TAD4	ZNT5_HUMAN,105.67478,3,452.47565,,,,,98.97152,,496.34076,3,3,,,,1,1,,4,,84046.5,Zinc transporter 5 OS=Homo sapiens OX=9606 GN=SLC30A5 PE=1 SV=1
506,TRUE,Q14244	MAP7_HUMAN,161.17561,8,135.02356,,,324.17624,904.6612,1769.4034,1112.6877,1900.8418,8,1,1,1,4,9,10,5,8,Acetylation (N-term),84051.77,Ensconsin OS=Homo sapiens OX=9606 GN=MAP7 PE=1 SV=1
596,TRUE,P0DP24	CALM2_HUMAN,144.50002,6,2508.3958,1173.0145,1005.43744,2768.9917,830.64856,169.68666,845.9133,1069.0598,6,8,4,4,6,5,6,3,2,Acetylation (N-term); Oxidation (M),16837.582,Calmodulin-2 OS=Homo sapiens OX=9606 GN=CALM2 PE=1 SV=1
429,TRUE,Q9NP72	RAB18_HUMAN,235.7219,9,6838.5605,2998.6633,2287.3506,3939.9885,2867.8213,3333.172,3639.2363,6139.7744,8,10,11,11,11,11,11,8,10,Oxidation (M),22977.07,Ras-related protein Rab-18 OS=Homo sapiens OX=9606 GN=RAB18 PE=1 SV=1
17,FALSE,Q14643	ITPR1_HUMAN,156.29509,7,703.4969,430.27972,,260.51422,464.24927,743.36,621.6328,1075.2059,2,14,12,9,11,9,11,7,10,Carbamidomethylation; Oxidation (M),313929.03,"Inositol 1,4,5-trisphosphate receptor type 1 OS=Homo sapiens OX=9606 GN=ITPR1 PE=1 SV=3"
121,TRUE,P06733	ENOA_HUMAN,355.58444,25,14479.732,10134.361,14440.57,19066.908,53810.89,38001.445,44332.07,32745.887,25,26,29,29,35,59,38,43,44,Carbamidomethylation; Oxidation (M),47168.957,Alpha-enolase OS=Homo sapiens OX=9606 GN=ENO1 PE=1 SV=2
601,TRUE,Q04760	LGUL_HUMAN,131.89035,5,,,,,552.26086,424.888,2087.3994,2011.7991,5,,,,,3,5,5,5,Oxidation (M); Carbamidomethylation,20777.707,Lactoylglutathione lyase OS=Homo sapiens OX=9606 GN=GLO1 PE=1 SV=4
691,TRUE,Q9Y653	AGRG1_HUMAN,151.41759,5,1142.1221,1388.8173,712.1492,1413.6088,828.7582,211.31277,2336.1023,3536.7156,5,6,4,6,7,3,2,6,6,,77738.02,Adhesion G-protein coupled receptor G1 OS=Homo sapiens OX=9606 GN=ADGRG1 PE=1 SV=2
26,FALSE,Q9Y4D7	PLXD1_HUMAN,74.34258,2,1416.1969,488.11545,403.33023,602.37866,519.7938,450.3371,587.1093,505.3691,2,3,3,2,3,1,1,1,2,,212006.95,Plexin-D1 OS=Homo sapiens OX=9606 GN=PLXND1 PE=1 SV=3
101,TRUE,Q05397	FAK1_HUMAN,306.65173,28,1558.6478,394.68542,4013.797,6842.2915,13942.276,11958.444,25768.158,31961.96,27,8,1,15,25,33,18,50,50,Acetylation (N-term); Oxidation (M); Carbamidomethylation,119233.01,Focal adhesion kinase 1 OS=Homo sapiens OX=9606 GN=PTK2 PE=1 SV=2
53,TRUE,P11142	HSP7C_HUMAN,418.8851,43,171994.03,125346.68,110103.65,166679.19,198465.84,208547.66,195579.9,233256.02,25,121,121,113,128,131,128,127,151,Carbamidomethylation; Oxidation (M),70898.086,Heat shock cognate 71 kDa protein OS=Homo sapiens OX=9606 GN=HSPA8 PE=1 SV=1
325,TRUE,Q96A65	EXOC4_HUMAN,226.47247,14,,,,315.06055,,,1549.6827,1802.0867,14,1,,,3,5,2,15,13,,110498.055,Exocyst complex component 4 OS=Homo sapiens OX=9606 GN=EXOC4 PE=1 SV=1
196,TRUE,P48960	AGRE5_HUMAN,286.785,15,26442.516,19668.645,9088.696,19810.525,17446.312,18458.016,31335.893,32712.404,15,35,28,22,33,26,28,28,32,Carbamidomethylation; Oxidation (M),91869.28,Adhesion G protein-coupled receptor E5 OS=Homo sapiens OX=9606 GN=ADGRE5 PE=1 SV=4
358,TRUE,Q15286	RAB35_HUMAN,255.59363,11,9498.36,5793.572,1185.5795,5618.0454,2348.5852,1702.5126,8220.482,9806.183,9,31,29,18,29,15,16,23,25,Oxidation (M),23025.215,Ras-related protein Rab-35 OS=Homo sapiens OX=9606 GN=RAB35 PE=1 SV=1
984,TRUE,O15287	FANCG_HUMAN,110.03336,2,,66.26137,,,259.61377,235.54256,277.43668,325.67078,2,,1,1,1,3,4,6,2,,68553.64,Fanconi anemia group G protein OS=Homo sapiens OX=9606 GN=FANCG PE=1 SV=1
214,TRUE,Q9C0B5	ZDHC5_HUMAN,295.9843,18,12956.935,7827.3237,4905.37,9032.963,6948.516,6477.2295,6519.421,8857.08,18,25,24,22,23,24,17,16,18,Oxidation (M),77544.73,Palmitoyltransferase ZDHHC5 OS=Homo sapiens OX=9606 GN=ZDHHC5 PE=1 SV=2
632,TRUE,Q29983	MICA_HUMAN,139.20284,4,559.223,,320.21985,1694.9827,1180.9178,1848.7306,3142.5293,1112.9331,4,5,3,6,6,5,4,7,5,Oxidation (M),42915.4,MHC class I polypeptide-related sequence A OS=Homo sapiens OX=9606 GN=MICA PE=1 SV=1
775,TRUE,P51153	RAB13_HUMAN,130.40094,4,1311.2837,862.9125,929.1456,,1089.0477,897.98505,1191.2993,1355.5217,2,6,5,4,4,7,4,4,4,Oxidation (M),22774.115,Ras-related protein Rab-13 OS=Homo sapiens OX=9606 GN=RAB13 PE=1 SV=1
740,TRUE,O95832	CLD1_HUMAN,152.85724,3,9196.611,5919.9873,5206.082,7374.117,3645.6523,4416.8726,7458.251,10105.451,3,13,8,6,5,4,6,6,10,Carbamidomethylation; Oxidation (M),22743.83,Claudin-1 OS=Homo sapiens OX=9606 GN=CLDN1 PE=1 SV=1
231,TRUE,Q9BTU6	P4K2A_HUMAN,249.56091,18,8267.664,5414.8115,2491.7793,6121.793,732.10266,,2078.0466,4535.6562,18,20,21,18,24,7,8,10,11,Oxidation (M),54022.363,Phosphatidylinositol 4-kinase type 2-alpha OS=Homo sapiens OX=9606 GN=PI4K2A PE=1 SV=1
148,TRUE,P27816	MAP4_HUMAN,268.09952,23,1311.6876,212.28107,1414.3264,2697.5352,8990.521,7790.6953,10083.613,12406.672,23,3,2,11,18,24,24,24,24,Acetylation (N-term); Oxidation (M),121004.98,Microtubule-associated protein 4 OS=Homo sapiens OX=9606 GN=MAP4 PE=1 SV=3
664,TRUE,Q8NFJ5	RAI3_HUMAN,156.07562,5,24239.688,17929.604,8799.303,18396.537,18712.188,19642.428,26990.912,30764.973,5,6,6,4,5,7,5,7,8,Carbamidomethylation,40251.1,Retinoic acid-induced protein 3 OS=Homo sapiens OX=9606 GN=GPRC5A PE=1 SV=2
705,FALSE,Q9Y5F0	PCDBD_HUMAN,94.93161,2,437.66748,,,176.94254,,,,328.8117,2,2,,,2,,1,,1,,87552.016,Protocadherin beta-13 OS=Homo sapiens OX=9606 GN=PCDHB13 PE=2 SV=1
935,TRUE,P29350	PTN6_HUMAN,91.03293,2,,,,,,,1127.9744,,2,,,,,,,2,1,,67561.13,Tyrosine-protein phosphatase non-receptor type 6 OS=Homo sapiens OX=9606 GN=PTPN6 PE=1 SV=1
537,FALSE,P15153	RAC2_HUMAN,114.264694,5,1292.008,1191.5526,3495.9224,5923.1763,2040.8472,2241.9072,1284.1321,4047.8782,4,3,4,5,6,2,2,6,3,Carbamidomethylation,21428.8,Ras-related C3 botulinum toxin substrate 2 OS=Homo sapiens OX=9606 GN=RAC2 PE=1 SV=1
543,TRUE,P29966	MARCS_HUMAN,189.28986,7,236.42506,,,221.181,,,,701.77905,7,8,2,2,9,8,8,8,6,,31554.656,Myristoylated alanine-rich C-kinase substrate OS=Homo sapiens OX=9606 GN=MARCKS PE=1 SV=4
16,TRUE,P16144	ITB4_HUMAN,488.0409,78,621552,452438.97,290806.53,506438.4,490225.03,530565.1,602857.4,704110.56,78,286,242,226,261,263,243,260,289,Carbamidomethylation; Oxidation (M),202167.14,Integrin beta-4 OS=Homo sapiens OX=9606 GN=ITGB4 PE=1 SV=5
88,TRUE,Q14247	SRC8_HUMAN,402.80627,37,64450.453,49313.5,55293.39,87362.34,126924.77,140113.02,163301.78,197658.86,37,64,47,60,75,84,98,88,90,Carbamidomethylation; Oxidation (M),61586.133,Src substrate cortactin OS=Homo sapiens OX=9606 GN=CTTN PE=1 SV=2
654,TRUE,O15120	PLCB_HUMAN,126.189316,4,377.8021,,,350.2479,450.4712,491.3802,1333.7312,2775.0063,4,1,,1,2,2,4,2,5,Oxidation (M),30914.346,1-acyl-sn-glycerol-3-phosphate acyltransferase beta OS=Homo sapiens OX=9606 GN=AGPAT2 PE=1 SV=1
498,TRUE,Q9H910	JUPI2_HUMAN,165.10446,6,586.74304,877.648,363.9051,1823.0767,6075.074,6794.0996,2575.9834,6548.5757,6,1,2,3,4,12,12,7,11,Carbamidomethylation; Oxidation (M),20063.293,Jupiter microtubule associated homolog 2 OS=Homo sapiens OX=9606 GN=JPT2 PE=1 SV=1
355,TRUE,O15439	MRP4_HUMAN,200.69644,12,2199.9443,312.7672,,1291.9938,,,57.695293,81.33844,12,16,10,5,11,5,3,2,4,Oxidation (M),149526.77,Multidrug resistance-associated protein 4 OS=Homo sapiens OX=9606 GN=ABCC4 PE=1 SV=3
56,TRUE,O60716	CTND1_HUMAN,404.72372,39,95033.36,66808.9,43268.195,66777.66,94919.33,98004.54,117328.81,142758.53,39,75,72,51,67,76,83,108,103,Oxidation (M); Carbamidomethylation,108170.02,Catenin delta-1 OS=Homo sapiens OX=9606 GN=CTNND1 PE=1 SV=1
221,TRUE,P54578	UBP14_HUMAN,266.3978,16,828.34265,287.0962,142.50908,3339.5483,5237.3745,4574.042,6746.8774,7555.092,16,3,1,4,13,23,19,28,23,Oxidation (M); Carbamidomethylation,56069.066,Ubiquitin carboxyl-terminal hydrolase 14 OS=Homo sapiens OX=9606 GN=USP14 PE=1 SV=3
233,TRUE,Q9UHR4	BI2L1_HUMAN,279.94482,17,697.0245,135.12747,479.67377,1808.1326,3074.941,3340.4136,8360.724,8382.53,17,6,4,5,8,17,19,23,25,Oxidation (M),56882.64,Brain-specific angiogenesis inhibitor 1-associated protein 2-like protein 1 OS=Homo sapiens OX=9606 GN=BAIAP2L1 PE=1 SV=2
167,TRUE,Q96PD2	DCBD2_HUMAN,311.39984,22,54530.293,35764.586,26796.506,46282.664,38062.086,39324.03,55684.492,55003.574,22,36,41,40,43,30,40,45,43,Oxidation (M); Carbamidomethylation,85034.64,"Discoidin, CUB and LCCL domain-containing protein 2 OS=Homo sapiens OX=9606 GN=DCBLD2 PE=1 SV=1"
344,TRUE,P35241	RADI_HUMAN,226.41531,11,,,,402.7212,,,,367.83505,2,16,14,15,20,11,15,23,25,Oxidation (M),68563.9,Radixin OS=Homo sapiens OX=9606 GN=RDX PE=1 SV=1
625,TRUE,Q9Y289	SC5A6_HUMAN,147.10059,5,4777.3223,1645.2219,742.9176,2467.8647,3247.9932,2149.2256,2703.7957,6738.8374,5,6,5,8,6,4,5,6,7,Oxidation (M),68641.94,Sodium-dependent multivitamin transporter OS=Homo sapiens OX=9606 GN=SLC5A6 PE=2 SV=2
461,TRUE,Q9UHE8	STEA1_HUMAN,187.33511,8,6332.2354,3801.7036,1635.4574,4676.3945,3263.7268,2274.4424,4637.14,5975.7607,8,11,7,12,9,6,9,10,9,Oxidation (M),39851.125,Metalloreductase STEAP1 OS=Homo sapiens OX=9606 GN=STEAP1 PE=1 SV=1
120,TRUE,P63010	AP2B1_HUMAN,344.25787,28,18244.65,11388.142,9929.154,17333.63,7806.4893,6653.158,8787.067,12093.491,28,41,39,35,40,25,23,26,27,Oxidation (M); Carbamidomethylation,104552.56,AP-2 complex subunit beta OS=Homo sapiens OX=9606 GN=AP2B1 PE=1 SV=1
267,TRUE,O14672	ADA10_HUMAN,240.324,15,54983.04,39251.473,29656.453,48398.254,43458.01,46098.74,54630.043,65460.156,15,32,34,23,28,23,27,34,39,Oxidation (M); Acetylation (N-term); Carbamidomethylation,84142.12,Disintegrin and metalloproteinase domain-containing protein 10 OS=Homo sapiens OX=9606 GN=ADAM10 PE=1 SV=1
812,TRUE,Q96HI0	SENP5_HUMAN,138.42572,3,,,,,,,51.655903,217.11328,3,3,1,,2,1,6,4,2,Oxidation (M),86693.03,Sentrin-specific protease 5 OS=Homo sapiens OX=9606 GN=SENP5 PE=1 SV=3
628,TRUE,P09493	TPM1_HUMAN,129.81738,5,3405.6404,2123.5295,3638.8494,6513.3994,12096.828,10082.791,10843.512,14755.375,5,6,4,8,8,11,9,6,10,Oxidation (M),32708.564,Tropomyosin alpha-1 chain OS=Homo sapiens OX=9606 GN=TPM1 PE=1 SV=2
384,TRUE,Q9ULF5	S39AA_HUMAN,186.79196,11,9136.477,6033.2583,4364.093,4171.357,8849.645,8248.413,11165.636,15130.54,11,10,11,10,11,15,16,9,13,Oxidation (M),94131.9,Zinc transporter ZIP10 OS=Homo sapiens OX=9606 GN=SLC39A10 PE=1 SV=2
898,TRUE,P78504	JAG1_HUMAN,86.442474,2,,,,,,,,,2,1,1,,,,,,,Oxidation (M),133798.6,Protein jagged-1 OS=Homo sapiens OX=9606 GN=JAG1 PE=1 SV=3
605,TRUE,P21926	CD9_HUMAN,150.00911,6,42068.6,31087.965,28095.912,42417.766,25438.172,27329.178,34228.67,38965.4,6,10,10,8,15,9,12,7,9,,25416.053,CD9 antigen OS=Homo sapiens OX=9606 GN=CD9 PE=1 SV=4
317,TRUE,Q9HD26	GOPC_HUMAN,246.10234,14,842.9692,706.13367,478.92462,1608.9855,3501.096,3461.3071,2589.5662,4218.6606,14,7,5,2,9,13,14,13,17,Carbamidomethylation,50519.97,Golgi-associated PDZ and coiled-coil motif-containing protein OS=Homo sapiens OX=9606 GN=GOPC PE=1 SV=1
705,FALSE,Q9Y5E5	PCDB4_HUMAN,105.98369,3,297.44473,,,176.94254,,,,520.02356,3,1,1,,1,,,,3,,87270.16,Protocadherin beta-4 OS=Homo sapiens OX=9606 GN=PCDHB4 PE=2 SV=1
518,TRUE,P84022	SMAD3_HUMAN,168.29086,7,291.2611,,,559.0784,1272.3773,1334.8428,3196.4216,1913.9764,7,1,2,2,3,9,8,6,6,Oxidation (M),48080.75,Mothers against decapentaplegic homolog 3 OS=Homo sapiens OX=9606 GN=SMAD3 PE=1 SV=1
295,TRUE,Q92859	NEO1_HUMAN,239.18758,14,1486.0598,347.725,,16200.215,403.9961,704.47925,8231.105,2729.246,14,13,10,4,10,8,12,14,11,Acetylation (N-term); Oxidation (M),160016.55,Neogenin OS=Homo sapiens OX=9606 GN=NEO1 PE=1 SV=2
905,TRUE,Q99829	CPNE1_HUMAN,103.30314,2,,,,,,,,406.9406,2,,,,3,1,1,3,3,,59058.79,Copine-1 OS=Homo sapiens OX=9606 GN=CPNE1 PE=1 SV=1
303,TRUE,Q02978	M2OM_HUMAN,249.078,11,6345.372,3684.8733,2446.353,5106.727,5861.034,5954.697,9519.387,11357.914,11,16,14,14,21,20,24,31,13,Acetylation (N-term); Oxidation (M),34061.707,Mitochondrial 2-oxoglutarate/malate carrier protein OS=Homo sapiens OX=9606 GN=SLC25A11 PE=1 SV=3
394,TRUE,P40189	IL6RB_HUMAN,195.18214,9,955.7187,809.08044,184.66455,102.21991,690.7882,843.8987,798.4186,1222.2407,9,4,5,2,9,6,6,9,8,Oxidation (M),103536.59,Interleukin-6 receptor subunit beta OS=Homo sapiens OX=9606 GN=IL6ST PE=1 SV=2
114,TRUE,P07355	ANXA2_HUMAN,376.83588,28,316304.4,234762.52,192182.52,317277.72,246007.36,231790.31,273677.9,328111.1,28,89,103,94,101,97,104,102,95,Carbamidomethylation; Acetylation (N-term); Oxidation (M),38604.035,Annexin A2 OS=Homo sapiens OX=9606 GN=ANXA2 PE=1 SV=2
367,TRUE,P51617	IRAK1_HUMAN,218.92061,12,,,,708.148,2021.6312,2279.9712,3372.8206,4142.8936,12,,,2,8,8,7,14,11,,76536.69,Interleukin-1 receptor-associated kinase 1 OS=Homo sapiens OX=9606 GN=IRAK1 PE=1 SV=2
761,TRUE,Q7L9B9	EEPD1_HUMAN,114.72414,4,675.1513,,,303.0325,,,199.86548,344.10712,4,6,1,,2,,,2,3,,62402.637,Endonuclease/exonuclease/phosphatase family domain-containing protein 1 OS=Homo sapiens OX=9606 GN=EEPD1 PE=1 SV=2
637,TRUE,Q8IXI2	MIRO1_HUMAN,150.32008,6,1201.6638,498.0371,,353.9898,,,,,5,10,4,2,7,2,1,3,3,,70784.21,Mitochondrial Rho GTPase 1 OS=Homo sapiens OX=9606 GN=RHOT1 PE=1 SV=2
92,TRUE,Q9Y2A7	NCKP1_HUMAN,317.22253,29,4153.3286,958.7062,1407.3564,3888.4692,9617.308,13587.378,16688.309,21184.242,29,21,12,15,23,27,40,46,40,Oxidation (M); Carbamidomethylation,128789.984,Nck-associated protein 1 OS=Homo sapiens OX=9606 GN=NCKAP1 PE=1 SV=1
596,TRUE,P0DP25	CALM3_HUMAN,144.50002,6,2508.3958,1173.0145,1005.43744,2768.9917,830.64856,169.68666,845.9133,1069.0598,6,8,4,4,6,5,6,3,2,Acetylation (N-term); Oxidation (M),16837.582,Calmodulin-3 OS=Homo sapiens OX=9606 GN=CALM3 PE=1 SV=1
457,TRUE,Q06787	FMR1_HUMAN,210.87756,8,3934.1472,3013.318,2339.0378,4019.592,5406.0024,5473.7827,7297.0146,8449.4,8,7,6,4,9,10,8,12,17,Oxidation (M),71174.47,Synaptic functional regulator FMR1 OS=Homo sapiens OX=9606 GN=FMR1 PE=1 SV=1
6,TRUE,P35579	MYH9_HUMAN,503.13065,95,58522.65,35365.453,34176.453,73852.22,124207.414,133997.55,177815.5,385664.28,81,134,94,124,159,180,186,211,223,Oxidation (M); Carbamidomethylation,226532.23,Myosin-9 OS=Homo sapiens OX=9606 GN=MYH9 PE=1 SV=4
723,TRUE,Q9Y696	CLIC4_HUMAN,118.90494,4,,,,,,,446.54163,732.2883,3,,,,,1,,2,3,Carbamidomethylation,28772.102,Chloride intracellular channel protein 4 OS=Homo sapiens OX=9606 GN=CLIC4 PE=1 SV=4
400,TRUE,P57735	RAB25_HUMAN,236.99896,11,6627.3364,7208.9517,5885.1904,8941.359,3006.311,2395.8745,5669.5127,5421.968,10,18,17,16,18,7,10,17,11,Oxidation (M),23495.613,Ras-related protein Rab-25 OS=Homo sapiens OX=9606 GN=RAB25 PE=1 SV=2
541,TRUE,Q03001	DYST_HUMAN,180.98993,6,536.3325,,,,,,499.6275,1634.0288,3,3,1,1,2,6,7,3,6,Oxidation (M),860661.8,Dystonin OS=Homo sapiens OX=9606 GN=DST PE=1 SV=4
34,TRUE,O15020	SPTN2_HUMAN,380.7163,56,13669.3545,6566.365,3916.9414,10240.069,9118.851,5801.495,8942.215,12057.989,48,68,65,47,71,55,48,57,67,Carbamidomethylation; Oxidation (M),271324.88,"Spectrin beta chain, non-erythrocytic 2 OS=Homo sapiens OX=9606 GN=SPTBN2 PE=1 SV=3"
147,FALSE,P78352	DLG4_HUMAN,88.71516,4,,,,,,,,,4,2,,,2,,1,2,3,,80495.37,Disks large homolog 4 OS=Homo sapiens OX=9606 GN=DLG4 PE=1 SV=3
885,TRUE,P53041	PPP5_HUMAN,103.33577,2,,,,,,,,,2,,,,,,,1,3,,56878.645,Serine/threonine-protein phosphatase 5 OS=Homo sapiens OX=9606 GN=PPP5C PE=1 SV=1
146,TRUE,O95171	SCEL_HUMAN,321.30774,27,11573.084,6591.2075,6310.9336,16528.264,14459.205,28407.24,24150.367,24807.117,27,29,29,31,34,39,35,37,40,Oxidation (M),77551.73,Sciellin OS=Homo sapiens OX=9606 GN=SCEL PE=1 SV=2
827,TRUE,Q6UXY8	TMC5_HUMAN,104.065254,3,,,,,,,,,3,,,,1,2,,2,1,,114797,Transmembrane channel-like protein 5 OS=Homo sapiens OX=9606 GN=TMC5 PE=2 SV=3
894,TRUE,Q96T83	SL9A7_HUMAN,97.518555,2,452.6396,,,215.19998,,,,,2,2,,2,3,,,2,1,Oxidation (M),80130.97,Sodium/hydrogen exchanger 7 OS=Homo sapiens OX=9606 GN=SLC9A7 PE=1 SV=1
595,TRUE,P30626	SORCN_HUMAN,146.5224,6,,,1246.3861,2283.7625,1843.9595,1327.6179,4011.5298,5235.6895,6,,,5,7,8,9,6,6,Oxidation (M),21676.375,Sorcin OS=Homo sapiens OX=9606 GN=SRI PE=1 SV=1
678,TRUE,O96005	CLPT1_HUMAN,129.24126,5,1955.2174,1070.2671,,798.15063,,,,,5,4,3,1,6,,1,,,Oxidation (M),76096.67,Cleft lip and palate transmembrane protein 1 OS=Homo sapiens OX=9606 GN=CLPTM1 PE=1 SV=1
509,TRUE,Q92552	RT27_HUMAN,183.7055,8,395.5298,,,664.4155,,,441.8158,1516.1619,8,2,1,1,1,4,,7,8,,47611.367,"28S ribosomal protein S27, mitochondrial OS=Homo sapiens OX=9606 GN=MRPS27 PE=1 SV=3"
425,TRUE,Q5ZPR3	CD276_HUMAN,252.82965,9,8554.365,6413.417,3335.1404,8271.83,5330.698,5341.925,11980.366,16707.11,9,12,12,11,14,12,8,11,17,Oxidation (M); Carbamidomethylation,57235.438,CD276 antigen OS=Homo sapiens OX=9606 GN=CD276 PE=1 SV=1
860,TRUE,Q8WXH0	SYNE2_HUMAN,81.88757,3,,,,,,52.70059,,,3,,,,,1,1,,1,,796442.44,Nesprin-2 OS=Homo sapiens OX=9606 GN=SYNE2 PE=1 SV=3
176,TRUE,P48634	PRC2A_HUMAN,263.82452,22,561.2575,,220.04324,1221.7103,2767.8506,2520.162,4139.3633,7173.499,22,4,3,5,6,17,16,14,23,Oxidation (M),228863.19,Protein PRRC2A OS=Homo sapiens OX=9606 GN=PRRC2A PE=1 SV=3
331,TRUE,Q96NY8	NECT4_HUMAN,233.51422,13,41117.758,1679.3794,1839.6735,4872.176,3405.6367,2721.0017,3172.3684,4476.5225,13,16,11,8,19,13,16,16,14,Oxidation (M),55454.285,Nectin-4 OS=Homo sapiens OX=9606 GN=NECTIN4 PE=1 SV=1
338,TRUE,P21709	EPHA1_HUMAN,257.63986,12,5443.645,3064.6646,1474.9508,3693.5469,1974.6211,3291.1042,6015.074,7071.55,12,24,14,11,12,8,20,22,14,Oxidation (M),108127.18,Ephrin type-A receptor 1 OS=Homo sapiens OX=9606 GN=EPHA1 PE=1 SV=4
279,TRUE,O00192	ARVC_HUMAN,256.1528,15,14491.427,1321.5295,389.3339,1349.2891,3183.8103,3057.1477,2478.7246,3781.9583,15,11,10,5,10,15,11,17,15,,104641.87,Armadillo repeat protein deleted in velo-cardio-facial syndrome OS=Homo sapiens OX=9606 GN=ARVCF PE=1 SV=1
503,TRUE,Q9UKY7	CDV3_HUMAN,159.03555,6,,,,,548.177,241.47882,613.74854,707.4385,6,,,,1,3,2,6,6,Oxidation (M),27334.838,Protein CDV3 homolog OS=Homo sapiens OX=9606 GN=CDV3 PE=1 SV=1
501,TRUE,Q6PCB8	EMB_HUMAN,216.56912,7,17260.66,11891.37,9116.268,15911.846,14038.209,11630.161,18941.355,22347.701,7,16,19,13,15,13,12,14,15,Carbamidomethylation; Oxidation (M),36880.95,Embigin OS=Homo sapiens OX=9606 GN=EMB PE=1 SV=1
229,TRUE,Q07065	CKAP4_HUMAN,279.3931,17,6754.9346,3809.4504,2150.626,6485.861,315.1046,305.5968,1035.3666,2287.8984,16,20,26,18,22,7,4,10,12,Oxidation (M),66022.46,Cytoskeleton-associated protein 4 OS=Homo sapiens OX=9606 GN=CKAP4 PE=1 SV=2
159,TRUE,Q86YS7	C2CD5_HUMAN,286.8522,19,5908.4233,4372.208,2669.956,5292.816,7542.544,9573.963,11202.273,12876.7,19,20,13,13,17,22,18,26,21,Oxidation (M); Carbamidomethylation,110447.01,C2 domain-containing protein 5 OS=Homo sapiens OX=9606 GN=C2CD5 PE=1 SV=1
602,TRUE,P20645	MPRD_HUMAN,193.27266,6,6166.654,7937.136,5288.3564,10293.954,1098.0016,565.46716,1916.2441,2233.815,6,11,11,8,13,2,1,3,3,Oxidation (M); Carbamidomethylation,30993.27,Cation-dependent mannose-6-phosphate receptor OS=Homo sapiens OX=9606 GN=M6PR PE=1 SV=1
611,TRUE,O95858	TSN15_HUMAN,146.24298,6,3201.8777,1948.4841,1549.68,2697.881,1509.8823,1793.4277,1488.3901,3642.6833,6,2,4,3,4,2,3,7,4,,33164.996,Tetraspanin-15 OS=Homo sapiens OX=9606 GN=TSPAN15 PE=1 SV=1
456,TRUE,Q96QT4	TRPM7_HUMAN,164.6442,9,,,,,266.13702,97.35692,,560.0917,9,5,1,,1,6,3,4,8,Oxidation (M),212697.03,Transient receptor potential cation channel subfamily M member 7 OS=Homo sapiens OX=9606 GN=TRPM7 PE=1 SV=1
492,TRUE,Q99805	TM9S2_HUMAN,229.80896,7,7042.917,3622.0408,3341.3384,4816.606,2949.8374,2563.961,2959.4321,5481.9033,7,14,12,12,13,12,11,12,10,Carbamidomethylation; Oxidation (M),75775.664,Transmembrane 9 superfamily member 2 OS=Homo sapiens OX=9606 GN=TM9SF2 PE=1 SV=1
178,FALSE,O00160	MYO1F_HUMAN,169.23297,4,171.92133,180.55214,,,529.37494,628.72473,1589.9922,2290.2012,4,3,1,1,1,2,6,6,9,,124844.27,Unconventional myosin-If OS=Homo sapiens OX=9606 GN=MYO1F PE=1 SV=3
1008,TRUE,Q8IUW5	RELL1_HUMAN,87.36536,2,,,,,,172.89099,,447.54398,2,3,1,1,3,,1,,1,Oxidation (M),29340.164,RELT-like protein 1 OS=Homo sapiens OX=9606 GN=RELL1 PE=1 SV=1
357,TRUE,P23634	AT2B4_HUMAN,210.43611,12,,,,,,,,,2,8,9,2,9,2,9,8,10,Oxidation (M),137920.16,Plasma membrane calcium-transporting ATPase 4 OS=Homo sapiens OX=9606 GN=ATP2B4 PE=1 SV=2
606,TRUE,Q9UGP4	LIMD1_HUMAN,177.97517,5,,,,,506.2267,665.25385,802.70154,1115.6694,5,,,,2,6,6,7,7,Oxidation (M),72190.2,LIM domain-containing protein 1 OS=Homo sapiens OX=9606 GN=LIMD1 PE=1 SV=1
197,TRUE,P52597	HNRPF_HUMAN,333.86523,16,99546.07,70544.195,76962.04,120817.664,129761.29,142564.44,181138.1,223391.1,16,50,47,48,63,50,65,75,78,Carbamidomethylation; Oxidation (M); Acetylation (N-term),45671.85,Heterogeneous nuclear ribonucleoprotein F OS=Homo sapiens OX=9606 GN=HNRNPF PE=1 SV=3
11,TRUE,P21333	FLNA_HUMAN,477.12097,98,26755.613,11938.866,17649.701,35933.6,125821.125,134593.19,121977.64,158856.8,85,87,62,101,114,208,199,178,179,Oxidation (M); Carbamidomethylation,280739,Filamin-A OS=Homo sapiens OX=9606 GN=FLNA PE=1 SV=4
373,FALSE,P15313	VATB1_HUMAN,87.5548,3,689.1848,466.07315,232.74138,455.33627,,199.35873,1139.3412,1223.8948,3,2,2,1,1,1,1,3,2,Oxidation (M),56833.035,"V-type proton ATPase subunit B, kidney isoform OS=Homo sapiens OX=9606 GN=ATP6V1B1 PE=1 SV=3"
4,TRUE,O75369	FLNB_HUMAN,498.3588,123,43013.242,23768.607,24737.416,46512.465,146052.08,160500.73,158406.6,256104.42,110,112,82,118,140,212,229,201,224,Oxidation (M); Carbamidomethylation,278164.03,Filamin-B OS=Homo sapiens OX=9606 GN=FLNB PE=1 SV=2
370,TRUE,P07996	TSP1_HUMAN,202.87216,10,422.30145,169.50275,,318.65518,1651.4894,2547.684,3725.7295,4201.046,10,2,1,1,1,6,10,13,12,Oxidation (M),129382.664,Thrombospondin-1 OS=Homo sapiens OX=9606 GN=THBS1 PE=1 SV=2
46,TRUE,Q13740	CD166_HUMAN,443.4511,44,1034490.25,771795.06,513593.84,833714.6,384861.97,432786.16,537004.44,620068.94,44,241,224,198,229,143,151,163,166,Carbamidomethylation; Oxidation (M),65102.277,CD166 antigen OS=Homo sapiens OX=9606 GN=ALCAM PE=1 SV=2
674,TRUE,P53365	ARFP2_HUMAN,146.3766,5,,,,623.3788,934.015,1002.2338,1012.4201,2068.6323,5,,,2,3,7,5,4,6,Oxidation (M),37855.73,Arfaptin-2 OS=Homo sapiens OX=9606 GN=ARFIP2 PE=1 SV=1
201,TRUE,P22059	OSBP1_HUMAN,269.7015,21,989.7311,234.87405,648.23816,1418.202,2751.3342,3304.434,4693.26,7249.5244,21,6,2,10,11,16,13,28,29,,89420.56,Oxysterol-binding protein 1 OS=Homo sapiens OX=9606 GN=OSBP PE=1 SV=1
656,TRUE,Q68CP9	ARID2_HUMAN,140.0359,5,409.33505,152.36412,,405.85535,307.51675,341.8643,1103.6404,890.4666,5,4,3,3,2,4,3,5,3,Oxidation (M),197390.86,AT-rich interactive domain-containing protein 2 OS=Homo sapiens OX=9606 GN=ARID2 PE=1 SV=2
475,TRUE,O15400	STX7_HUMAN,197.35391,8,10365.811,6159.917,5076.908,8745.734,881.19507,365.28146,1864.632,3487.48,8,12,8,10,12,3,3,3,13,Carbamidomethylation; Oxidation (M),29815.53,Syntaxin-7 OS=Homo sapiens OX=9606 GN=STX7 PE=1 SV=4
495,TRUE,P13861	KAP2_HUMAN,209.562,8,1413.9585,509.3019,,1082.8025,1125.741,717.89575,1831.3394,2046.1672,8,7,6,3,6,8,6,4,8,Oxidation (M),45518.402,cAMP-dependent protein kinase type II-alpha regulatory subunit OS=Homo sapiens OX=9606 GN=PRKAR2A PE=1 SV=2
684,TRUE,O43556	SGCE_HUMAN,107.97417,4,513.5558,,,250.08679,339.62927,,1063.2354,1326.5374,4,1,1,1,2,3,,4,5,Oxidation (M),49851.004,Epsilon-sarcoglycan OS=Homo sapiens OX=9606 GN=SGCE PE=1 SV=6
949,TRUE,O43752	STX6_HUMAN,91.35319,2,781.9282,151.78984,,167.69148,,,,,2,4,2,,3,,,,,Oxidation (M),29175.95,Syntaxin-6 OS=Homo sapiens OX=9606 GN=STX6 PE=1 SV=1
952,TRUE,Q92845	KIFA3_HUMAN,66.7122,2,284.51294,244.5438,,180.43323,,,,,2,1,1,,1,,,1,,,91205.14,Kinesin-associated protein 3 OS=Homo sapiens OX=9606 GN=KIFAP3 PE=1 SV=2
177,TRUE,P50895	BCAM_HUMAN,313.60703,16,48777.836,34092.836,23691.271,43246.49,30613.068,33672.93,41153.9,49891.504,16,42,29,30,42,32,39,33,35,Carbamidomethylation; Oxidation (M),67404.79,Basal cell adhesion molecule OS=Homo sapiens OX=9606 GN=BCAM PE=1 SV=2
189,TRUE,P51572	BAP31_HUMAN,252.42003,15,34164.867,35984.496,16233.797,48210.855,653.3322,491.19525,5093.009,6371.0596,15,39,31,35,34,4,6,7,16,Oxidation (M),27991.604,B-cell receptor-associated protein 31 OS=Homo sapiens OX=9606 GN=BCAP31 PE=1 SV=3
767,TRUE,Q9UHD9	UBQL2_HUMAN,117.32746,4,356.53946,,147.6796,146.05608,466.39062,655.66205,549.214,923.3684,4,2,1,1,1,4,4,2,3,,65696.08,Ubiquilin-2 OS=Homo sapiens OX=9606 GN=UBQLN2 PE=1 SV=2
131,TRUE,A0FGR8	ESYT2_HUMAN,337.45697,26,23632.352,15656.251,9746.127,16314.734,7094.08,8427.613,14798.109,17173.053,26,45,41,47,52,42,42,36,39,Carbamidomethylation; Oxidation (M),102357.48,Extended synaptotagmin-2 OS=Homo sapiens OX=9606 GN=ESYT2 PE=1 SV=1
537,FALSE,P60763	RAC3_HUMAN,103.641335,4,1292.008,1191.5526,3495.9224,5923.1763,2040.8472,2241.9072,1284.1321,4047.8782,3,3,4,5,5,2,2,6,2,Carbamidomethylation,21378.854,Ras-related C3 botulinum toxin substrate 3 OS=Homo sapiens OX=9606 GN=RAC3 PE=1 SV=1
13,FALSE,P53675	CLH2_HUMAN,315.28537,20,46123.547,30562.596,22877.883,38912.863,24173.584,24146.232,43567.438,46180.562,20,44,38,34,37,32,35,47,50,Oxidation (M); Carbamidomethylation,187029.9,Clathrin heavy chain 2 OS=Homo sapiens OX=9606 GN=CLTCL1 PE=1 SV=2
259,TRUE,P17931	LEG3_HUMAN,234.86212,14,81772.9,63020.465,44976.81,70980.66,113908.695,122096.16,137416.06,160041.23,14,33,32,28,30,39,40,43,36,Oxidation (M); Carbamidomethylation,26152.33,Galectin-3 OS=Homo sapiens OX=9606 GN=LGALS3 PE=1 SV=5
195,TRUE,Q4KMQ2	ANO6_HUMAN,249.1317,16,5037.0874,2155.358,1056.972,4057.9993,981.22876,2686.191,2149.4644,5885.556,16,22,13,14,17,11,11,11,15,Oxidation (M),106164.96,Anoctamin-6 OS=Homo sapiens OX=9606 GN=ANO6 PE=1 SV=2
304,TRUE,P68400	CSK21_HUMAN,290.1937,12,15418.439,8830.188,7292.289,12635.8955,17694.195,16121.705,21009.1,35064.375,11,23,17,17,15,20,20,22,25,Oxidation (M),45143.574,Casein kinase II subunit alpha OS=Homo sapiens OX=9606 GN=CSNK2A1 PE=1 SV=1
788,TRUE,O14966	RAB7L_HUMAN,107.009476,3,,,,,,,224.54544,151.31169,2,2,1,2,2,,,2,2,,23155.248,Ras-related protein Rab-7L1 OS=Homo sapiens OX=9606 GN=RAB29 PE=1 SV=1
224,TRUE,Q9Y5K6	CD2AP_HUMAN,271.76465,18,,,,7416.6055,921.6143,5618.524,3351.8662,5706.9604,18,,,7,15,11,12,18,17,Oxidation (M),71451.17,CD2-associated protein OS=Homo sapiens OX=9606 GN=CD2AP PE=1 SV=1
555,TRUE,Q9NZ08	ERAP1_HUMAN,158.34634,7,171.64902,,,,224.9892,405.80994,894.3441,799.4862,7,2,,,,3,3,8,5,,107234.8,Endoplasmic reticulum aminopeptidase 1 OS=Homo sapiens OX=9606 GN=ERAP1 PE=1 SV=3
854,TRUE,O60603	TLR2_HUMAN,76.75166,3,,,,,,,,,3,,,,,,,3,2,,89837.586,Toll-like receptor 2 OS=Homo sapiens OX=9606 GN=TLR2 PE=1 SV=1
301,TRUE,P26232	CTNA2_HUMAN,291.8252,14,29785.77,28320.36,8680.605,8684.492,17364.207,22333.54,13717.566,19963.898,2,43,34,33,39,35,29,26,26,Carbamidomethylation; Oxidation (M),105312.94,Catenin alpha-2 OS=Homo sapiens OX=9606 GN=CTNNA2 PE=1 SV=5
777,TRUE,O96019	ACL6A_HUMAN,137.51721,4,2195.8667,817.3643,379.33575,1725.6396,969.0896,825.449,2032.612,2426.8125,4,6,4,2,2,3,2,9,5,,47460.96,Actin-like protein 6A OS=Homo sapiens OX=9606 GN=ACTL6A PE=1 SV=1
662,TRUE,Q15043	S39AE_HUMAN,165.66869,4,2139.888,4084.9233,2196.6958,5309.178,2530.3933,3368.072,2371.8987,5060.267,4,9,7,4,7,6,4,6,7,Oxidation (M),54212.29,Metal cation symporter ZIP14 OS=Homo sapiens OX=9606 GN=SLC39A14 PE=1 SV=3
1006,TRUE,Q9GZT4	SRR_HUMAN,115.10899,2,,,,,,,,,2,,,,,1,2,1,2,,36566.22,Serine racemase OS=Homo sapiens OX=9606 GN=SRR PE=1 SV=1
858,TRUE,Q9NRX5	SERC1_HUMAN,142.12468,3,1063.9043,557.0168,370.4408,652.4994,311.34863,289.0941,328.54654,678.7379,3,4,4,4,4,4,3,3,3,,50494.945,Serine incorporator 1 OS=Homo sapiens OX=9606 GN=SERINC1 PE=1 SV=1
151,TRUE,Q16643	DREB_HUMAN,343.14816,22,35986.723,23801.924,15082.32,24905.71,28613.137,29123.701,29907.664,39707.652,22,38,34,26,26,41,32,34,38,Acetylation (N-term); Oxidation (M),71429.29,Drebrin OS=Homo sapiens OX=9606 GN=DBN1 PE=1 SV=4
801,TRUE,Q8NG11	TSN14_HUMAN,106.41316,3,460.29822,373.02728,,1001.43256,,169.42865,346.5436,976.78687,3,3,2,1,2,2,2,3,3,Carbamidomethylation,30690.83,Tetraspanin-14 OS=Homo sapiens OX=9606 GN=TSPAN14 PE=1 SV=1
319,TRUE,Q9P0L0	VAPA_HUMAN,220.91052,9,16818.541,10919.481,4908.989,14651.039,1544.9294,2180.1782,4078.2363,5713.0117,8,30,35,29,38,15,11,19,21,Carbamidomethylation; Oxidation (M),27893.229,Vesicle-associated membrane protein-associated protein A OS=Homo sapiens OX=9606 GN=VAPA PE=1 SV=3
166,TRUE,Q12797	ASPH_HUMAN,322.86346,23,7712.5347,8964.984,6859.6,14990.111,6906.488,6706.2236,10617.158,13396.022,23,21,20,33,35,20,16,24,20,Carbamidomethylation; Oxidation (M),85862.6,Aspartyl/asparaginyl beta-hydroxylase OS=Homo sapiens OX=9606 GN=ASPH PE=1 SV=3
673,TRUE,P63165	SUMO1_HUMAN,146.21243,5,2342.855,1683.3148,162.33017,1978.403,3424.9692,3672.0854,4457.423,5271.0166,5,4,5,4,5,5,5,7,7,Acetylation (N-term),11556.984,Small ubiquitin-related modifier 1 OS=Homo sapiens OX=9606 GN=SUMO1 PE=1 SV=1
12,TRUE,Q5T4S7	UBR4_HUMAN,463.66156,86,9305.051,6882.7695,1968.069,10343.618,28951.426,34042.3,31123.803,41530.375,86,32,30,31,54,106,99,117,117,Oxidation (M); Carbamidomethylation,573841,E3 ubiquitin-protein ligase UBR4 OS=Homo sapiens OX=9606 GN=UBR4 PE=1 SV=1
590,TRUE,Q08357	S20A2_HUMAN,174.42534,7,3836.0415,17155.67,928.58435,3027.0017,1910.1658,2368.4214,18786.238,6693.6777,7,13,7,4,8,12,6,12,11,,70392.414,Sodium-dependent phosphate transporter 2 OS=Homo sapiens OX=9606 GN=SLC20A2 PE=1 SV=1
972,TRUE,P13987	CD59_HUMAN,99.84554,2,53195.867,38909.438,36086.875,55884.242,32074.86,32086.627,46629.4,49914.598,2,10,7,7,13,5,7,8,7,Carbamidomethylation,14177.284,CD59 glycoprotein OS=Homo sapiens OX=9606 GN=CD59 PE=1 SV=1
794,TRUE,Q92485	ASM3B_HUMAN,121.2574,3,2383.9744,1148.4668,710.2425,2175.0808,1320.1841,808.86017,2257.2537,3053.4182,3,4,6,4,4,6,5,3,4,,50813.844,Acid sphingomyelinase-like phosphodiesterase 3b OS=Homo sapiens OX=9606 GN=SMPDL3B PE=1 SV=2
402,TRUE,P08865	RSSA_HUMAN,237.65256,10,3935.3303,1868.3738,2656.8975,4379.2173,12092.008,12419.134,11441.577,13794,10,5,7,9,9,18,21,21,18,Carbamidomethylation; Oxidation (M); Acetylation (N-term),32854.074,40S ribosomal protein SA OS=Homo sapiens OX=9606 GN=RPSA PE=1 SV=4
324,TRUE,P35611	ADDA_HUMAN,206.78706,13,673.43835,508.73245,301.09225,1163.7201,934.6708,1148.4067,3136.3496,3083.3235,13,3,2,3,7,7,7,13,14,Oxidation (M),80955.13,Alpha-adducin OS=Homo sapiens OX=9606 GN=ADD1 PE=1 SV=2
532,TRUE,Q9NUP9	LIN7C_HUMAN,162.6511,8,1938.2509,1087.429,172.87408,1926.9205,853.4966,964.1151,1725.0781,1711.9369,8,4,5,6,4,6,2,3,5,Acetylation (N-term); Oxidation (M); Carbamidomethylation,21833.975,Protein lin-7 homolog C OS=Homo sapiens OX=9606 GN=LIN7C PE=1 SV=1
313,TRUE,Q9Y6K5	OAS3_HUMAN,229.53679,12,294.07037,,,866.4699,3322.2183,4187.7754,3243.488,4805.443,12,1,,5,6,14,10,18,12,Oxidation (M),121170.164,2'-5'-oligoadenylate synthase 3 OS=Homo sapiens OX=9606 GN=OAS3 PE=1 SV=3
442,TRUE,P62879	GBB2_HUMAN,217.9836,9,505.49857,790.84357,274.29083,2340.7952,,,302.3377,251.14555,3,14,12,11,11,4,7,11,9,Carbamidomethylation; Oxidation (M); Acetylation (N-term),37331.027,Guanine nucleotide-binding protein G(I)/G(S)/G(T) subunit beta-2 OS=Homo sapiens OX=9606 GN=GNB2 PE=1 SV=3
273,FALSE,O15083	ERC2_HUMAN,86.84609,2,460.02844,281.27017,487.2524,603.89026,657.9087,636.07196,,1424.5905,2,1,2,2,2,2,2,3,3,,110557.586,ERC protein 2 OS=Homo sapiens OX=9606 GN=ERC2 PE=1 SV=3
696,TRUE,Q70E73	RAPH1_HUMAN,115.448715,5,,,,,,,,684.228,5,,,,2,1,3,1,3,Oxidation (M),135255.89,Ras-associated and pleckstrin homology domains-containing protein 1 OS=Homo sapiens OX=9606 GN=RAPH1 PE=1 SV=3
581,TRUE,O15118	NPC1_HUMAN,148.68405,7,1218.554,1451.6841,665.5722,2074.6538,,,282.01318,,6,7,6,6,7,1,2,1,3,,142166.84,NPC intracellular cholesterol transporter 1 OS=Homo sapiens OX=9606 GN=NPC1 PE=1 SV=2
897,TRUE,Q9P107	GMIP_HUMAN,67.223434,2,,,,327.6426,,,607.8826,942.2939,2,,,,1,,,2,2,,106682.9,GEM-interacting protein OS=Homo sapiens OX=9606 GN=GMIP PE=1 SV=2
996,TRUE,Q2M2I8	AAK1_HUMAN,50.743652,2,,,,,,,,,2,,,,,,,,3,Acetylation (N-term),103884.96,AP2-associated protein kinase 1 OS=Homo sapiens OX=9606 GN=AAK1 PE=1 SV=3
466,TRUE,O15258	RER1_HUMAN,191.01791,6,6466.5967,4456.988,3171.661,5242.559,841.76056,1275.0106,2634.4246,2427.792,6,11,8,8,7,5,5,6,2,Acetylation (N-term); Oxidation (M),22957.965,Protein RER1 OS=Homo sapiens OX=9606 GN=RER1 PE=1 SV=1
895,TRUE,Q8N8Q9	NIPA2_HUMAN,92.240295,2,301.00467,231.05766,,,,,,207.54446,2,2,1,1,1,,1,,1,,39185.027,Magnesium transporter NIPA2 OS=Homo sapiens OX=9606 GN=NIPA2 PE=2 SV=1
281,TRUE,Q9Y4H2	IRS2_HUMAN,307.19965,15,2176.595,1135.2937,483.25555,1797.6633,4403.597,4889.594,6685.255,10444.707,15,7,5,8,9,13,15,21,17,Oxidation (M),137334.06,Insulin receptor substrate 2 OS=Homo sapiens OX=9606 GN=IRS2 PE=1 SV=2
470,TRUE,P05362	ICAM1_HUMAN,244.24962,9,15736.363,10363.799,7176.6167,12074.837,8626.342,9617.937,12296.655,16892.688,9,13,11,12,15,13,14,12,14,Carbamidomethylation,57825.22,Intercellular adhesion molecule 1 OS=Homo sapiens OX=9606 GN=ICAM1 PE=1 SV=2
435,TRUE,Q7Z4S6	KI21A_HUMAN,202.74612,9,,,,,201.88455,,278.95883,957.5211,9,,1,,,4,1,7,15,Oxidation (M),187179.05,Kinesin-like protein KIF21A OS=Homo sapiens OX=9606 GN=KIF21A PE=1 SV=2
645,TRUE,Q9NR22	ANM8_HUMAN,140.7958,4,4422.4395,3428.67,2963.502,7385.6416,6299.725,3695.234,4007.368,9735.444,4,7,6,5,9,5,7,9,9,Oxidation (M),45291.156,Protein arginine N-methyltransferase 8 OS=Homo sapiens OX=9606 GN=PRMT8 PE=1 SV=2
773,TRUE,P60903	S10AA_HUMAN,107.01417,3,14923.89,12569.049,12424.2705,17807.717,10291.939,10209.874,13179.646,17920.781,3,6,4,7,5,4,4,6,8,Oxidation (M),11203.1,Protein S100-A10 OS=Homo sapiens OX=9606 GN=S100A10 PE=1 SV=2
291,TRUE,O00592	PODXL_HUMAN,271.58633,11,57159.008,43560.555,32902.082,53811.836,28935.588,26775.373,43538.566,46109.297,11,31,29,22,31,25,25,22,28,Carbamidomethylation; Oxidation (M),58635.254,Podocalyxin OS=Homo sapiens OX=9606 GN=PODXL PE=1 SV=2
717,TRUE,Q99808	S29A1_HUMAN,123.78416,4,1948.0242,1536.8557,1455.8181,2665.1182,,1549.54,1789.2942,1234.4214,4,5,3,5,6,3,3,4,6,,50219.44,Equilibrative nucleoside transporter 1 OS=Homo sapiens OX=9606 GN=SLC29A1 PE=1 SV=3
330,TRUE,Q8TEU7	RPGF6_HUMAN,192.16669,13,,,,170.65302,56.29025,250.89587,684.1228,1649.4988,12,,,,1,5,9,7,13,,179422.81,Rap guanine nucleotide exchange factor 6 OS=Homo sapiens OX=9606 GN=RAPGEF6 PE=1 SV=2
552,TRUE,P58335	ANTR2_HUMAN,149.92384,7,940.56976,651.3595,365.46545,677.9984,142.50455,224.83359,278.541,695.5236,7,7,4,3,5,3,1,6,6,,53666.168,Anthrax toxin receptor 2 OS=Homo sapiens OX=9606 GN=ANTXR2 PE=1 SV=5
890,TRUE,Q13444	ADA15_HUMAN,107.33888,2,329.39197,,,,,,112.651184,548.4661,2,2,1,2,3,1,1,2,3,,92959.23,Disintegrin and metalloproteinase domain-containing protein 15 OS=Homo sapiens OX=9606 GN=ADAM15 PE=1 SV=4
587,TRUE,Q9UL26	RB22A_HUMAN,156.33588,6,293.13644,77.07837,,132.7025,,,,311.45,6,4,3,1,5,,3,1,6,Oxidation (M),21855.06,Ras-related protein Rab-22A OS=Homo sapiens OX=9606 GN=RAB22A PE=1 SV=2
554,TRUE,Q12933	TRAF2_HUMAN,157.65047,6,368.0664,292.59772,,615.1245,3194.0317,3775.9841,1090.7001,1683.501,6,1,2,,3,5,8,3,4,Oxidation (M),55859.375,TNF receptor-associated factor 2 OS=Homo sapiens OX=9606 GN=TRAF2 PE=1 SV=2
939,TRUE,Q96IZ0	PAWR_HUMAN,119.70047,2,,,,265.8856,455.69897,,516.3255,916.2738,2,,,1,2,3,2,2,2,,36567.504,PRKC apoptosis WT1 regulator protein OS=Homo sapiens OX=9606 GN=PAWR PE=1 SV=1
416,TRUE,O95429	BAG4_HUMAN,254.303,9,1616.3098,831.61005,1136.8282,1754.0779,5947.3237,5530.3857,5737.9136,6163.472,8,14,5,6,12,18,17,20,18,Oxidation (M),49594.074,BAG family molecular chaperone regulator 4 OS=Homo sapiens OX=9606 GN=BAG4 PE=1 SV=1
668,TRUE,P13473	LAMP2_HUMAN,134.44673,5,6452.9756,3934.1492,4146.049,6804.362,380.23898,414.07532,805.637,1161.9514,5,7,5,8,9,3,4,4,6,,44960.727,Lysosome-associated membrane glycoprotein 2 OS=Homo sapiens OX=9606 GN=LAMP2 PE=1 SV=2
129,TRUE,P20073	ANXA7_HUMAN,304.9416,20,14844.588,10065.877,16814.041,25913.701,41947.52,46378.305,63530.2,61468.355,20,18,23,27,29,41,40,45,51,Oxidation (M); Carbamidomethylation,52739.24,Annexin A7 OS=Homo sapiens OX=9606 GN=ANXA7 PE=1 SV=3
804,TRUE,Q6IAA8	LTOR1_HUMAN,127.08278,3,5023.429,3206.4324,2264.726,2933.9736,337.47882,370.30222,1855.6519,1090.9358,3,4,5,5,3,1,2,3,3,,17744.818,Ragulator complex protein LAMTOR1 OS=Homo sapiens OX=9606 GN=LAMTOR1 PE=1 SV=2
386,TRUE,P04049	RAF1_HUMAN,200.86429,11,304.49152,317.091,261.85327,951.0383,982.5298,1515.3442,2955.5256,5588.021,11,1,1,1,3,8,7,12,16,Acetylation (N-term); Oxidation (M),73051.56,RAF proto-oncogene serine/threonine-protein kinase OS=Homo sapiens OX=9606 GN=RAF1 PE=1 SV=1
747,TRUE,P60510	PP4C_HUMAN,113.54699,3,158.00444,170.49002,143.80278,394.8108,308.5413,721.057,,,3,1,1,2,2,2,1,1,2,Oxidation (M),35079.92,Serine/threonine-protein phosphatase 4 catalytic subunit OS=Homo sapiens OX=9606 GN=PPP4C PE=1 SV=1
560,TRUE,Q13557	KCC2D_HUMAN,200.22523,7,1656.68,1067.1508,660.18884,1281.2733,4185.942,5134.042,4647.3706,6050.213,7,1,2,1,4,10,11,8,9,Oxidation (M),56369.402,Calcium/calmodulin-dependent protein kinase type II subunit delta OS=Homo sapiens OX=9606 GN=CAMK2D PE=1 SV=3
538,TRUE,Q8WWI5	CTL1_HUMAN,220.48155,8,3526.9192,947.80054,635.8905,2434.788,1342.0009,705.04645,2795.1333,3297.647,8,15,13,14,12,10,14,10,15,Oxidation (M); Carbamidomethylation,73302.11,Choline transporter-like protein 1 OS=Homo sapiens OX=9606 GN=SLC44A1 PE=1 SV=1
765,TRUE,Q8IYI6	EXOC8_HUMAN,129.28217,4,148.6265,,,,554.6012,399.3811,506.97998,1254.2396,4,1,,2,1,5,5,3,5,,81799.07,Exocyst complex component 8 OS=Homo sapiens OX=9606 GN=EXOC8 PE=1 SV=2
806,TRUE,P25445	TNR6_HUMAN,126.70013,3,308.32278,151.04445,,,,,146.27345,153.18506,3,5,3,1,3,3,1,3,6,,37732.2,Tumor necrosis factor receptor superfamily member 6 OS=Homo sapiens OX=9606 GN=FAS PE=1 SV=1
940,TRUE,P11171	EPB41_HUMAN,80.79863,2,,,,,,,,,2,1,4,1,2,,,,,,97016.88,Protein 4.1 OS=Homo sapiens OX=9606 GN=EPB41 PE=1 SV=4
76,TRUE,P02786	TFR1_HUMAN,392.29715,37,763547.44,547271.9,348561.2,561832.5,434054.72,467280.7,542649.3,643110.3,37,161,152,129,162,144,129,134,157,Oxidation (M); Carbamidomethylation,84871.375,Transferrin receptor protein 1 OS=Homo sapiens OX=9606 GN=TFRC PE=1 SV=2
864,TRUE,P54920	SNAA_HUMAN,85.74105,3,,,,296.03183,,,,,3,,,,2,,,,1,,33232.72,Alpha-soluble NSF attachment protein OS=Homo sapiens OX=9606 GN=NAPA PE=1 SV=3
705,TRUE,Q9Y5E2	PCDB7_HUMAN,123.89643,4,437.66748,,,176.94254,,,,520.02356,4,2,1,,2,,1,,3,,86707.14,Protocadherin beta-7 OS=Homo sapiens OX=9606 GN=PCDHB7 PE=2 SV=1
343,TRUE,Q12955	ANK3_HUMAN,216.19058,13,263.01877,,,235.2886,,712.94025,805.0215,1743.5704,13,7,,2,5,4,10,6,10,Oxidation (M),480410,Ankyrin-3 OS=Homo sapiens OX=9606 GN=ANK3 PE=1 SV=3
660,TRUE,Q14344	GNA13_HUMAN,159.0566,5,321.34808,204.58032,,502.01614,,,,342.55905,4,8,9,5,9,4,6,6,8,,44049.57,Guanine nucleotide-binding protein subunit alpha-13 OS=Homo sapiens OX=9606 GN=GNA13 PE=1 SV=2
375,TRUE,P13726	TF_HUMAN,282.06845,11,166911.94,122616.92,87736.49,141667.53,118554.375,122388.016,171443.5,196964.11,11,46,37,36,42,41,40,40,48,Carbamidomethylation; Oxidation (M),33067.516,Tissue factor OS=Homo sapiens OX=9606 GN=F3 PE=1 SV=1
565,TRUE,Q53EZ4	CEP55_HUMAN,157.11053,7,,,,1926.5745,1555.363,1512.6284,2605.3691,3174.9639,7,,1,,4,10,5,8,7,,54178.234,Centrosomal protein of 55 kDa OS=Homo sapiens OX=9606 GN=CEP55 PE=1 SV=3
802,TRUE,Q16880	CGT_HUMAN,106.434586,3,325.1148,112.71,,,,,,,3,3,4,1,2,,,1,,,61437.74,2-hydroxyacylsphingosine 1-beta-galactosyltransferase OS=Homo sapiens OX=9606 GN=UGT8 PE=1 SV=2
648,TRUE,Q13021	MALL_HUMAN,154.30917,5,1143.9705,,80.555466,215.27298,,,,150.13812,5,6,3,2,7,4,,2,1,Oxidation (M),17350.438,MAL-like protein OS=Homo sapiens OX=9606 GN=MALL PE=1 SV=2
57,TRUE,P13639	EF2_HUMAN,369.79532,40,17861.316,9937.783,24652.654,50031.39,76674.71,75835.65,88882.75,113100.3,40,39,43,50,54,84,73,86,100,Carbamidomethylation; Oxidation (M),95338.14,Elongation factor 2 OS=Homo sapiens OX=9606 GN=EEF2 PE=1 SV=4
194,TRUE,Q9ULC5	ACSL5_HUMAN,278.78836,20,98494.66,83671.35,57111.37,82919.086,82416.31,86031.1,9101.247,89963.34,19,25,26,22,22,17,21,22,25,Carbamidomethylation; Oxidation (M),75990.79,Long-chain-fatty-acid--CoA ligase 5 OS=Homo sapiens OX=9606 GN=ACSL5 PE=1 SV=1
1,TRUE,Q15149	PLEC_HUMAN,652.79193,321,1515690.4,1100166.4,641604.5,1060935.1,1037670.1,1090447.4,1282434.1,1417847,310,765,755,622,714,703,718,719,725,Oxidation (M); Carbamidomethylation; Acetylation (N-term),531790.75,Plectin OS=Homo sapiens OX=9606 GN=PLEC PE=1 SV=3
962,TRUE,Q969X1	LFG3_HUMAN,101.19007,2,4436.106,3154.1626,1736.804,3307.9878,2401.9717,2457.208,3540.8293,4367.4033,2,3,2,3,2,4,2,2,3,,34607.44,Protein lifeguard 3 OS=Homo sapiens OX=9606 GN=TMBIM1 PE=1 SV=2
1010,TRUE,Q9H4A4	AMPB_HUMAN,83.57647,2,,,,,,,,241.76205,2,,,,,,,2,2,,72595.77,Aminopeptidase B OS=Homo sapiens OX=9606 GN=RNPEP PE=1 SV=2
137,TRUE,P21980	TGM2_HUMAN,320.98163,24,4754.33,2832.6,6072.0137,16237.034,8421.646,11484.117,18458.256,22705.445,24,11,13,24,38,32,29,35,37,Carbamidomethylation; Oxidation (M),77328.82,Protein-glutamine gamma-glutamyltransferase 2 OS=Homo sapiens OX=9606 GN=TGM2 PE=1 SV=2
682,TRUE,Q9BQE4	SELS_HUMAN,151.78096,4,3383.159,1486.1307,776.7992,1329.5371,132.1394,,432.19434,708.1459,4,6,8,4,4,1,1,3,2,Oxidation (M),21131.838,Selenoprotein S OS=Homo sapiens OX=9606 GN=SELENOS PE=1 SV=3
547,TRUE,Q13586	STIM1_HUMAN,167.25143,7,1061.8613,687.7308,,1436.9508,,500.27145,,200.41223,7,6,4,5,6,4,3,1,3,,77423.38,Stromal interaction molecule 1 OS=Homo sapiens OX=9606 GN=STIM1 PE=1 SV=3
997,TRUE,Q8IYB5	SMAP1_HUMAN,94.54022,2,,,85.992836,,453.067,,295.04538,166.83377,2,2,,2,1,3,2,3,2,,50386.49,Stromal membrane-associated protein 1 OS=Homo sapiens OX=9606 GN=SMAP1 PE=1 SV=2
124,TRUE,Q5XXA6	ANO1_HUMAN,283.78073,27,31949.465,23894.05,16608.371,25969.89,13498.691,18212.18,25452.363,23836.648,27,43,28,30,39,32,30,34,40,Carbamidomethylation; Oxidation (M),114078.23,Anoctamin-1 OS=Homo sapiens OX=9606 GN=ANO1 PE=1 SV=1
764,TRUE,O75044	SRGP2_HUMAN,114.66331,4,,,,,152.17253,507.63818,698.14624,711.60187,4,,,,,4,3,4,6,,120870.55,SLIT-ROBO Rho GTPase-activating protein 2 OS=Homo sapiens OX=9606 GN=SRGAP2 PE=1 SV=3
386,FALSE,P15056	BRAF_HUMAN,132.42145,4,304.49152,317.091,261.85327,951.0383,982.5298,1211.5876,1758.4326,2546.0452,4,1,1,1,3,6,4,7,7,Oxidation (M),84436.88,Serine/threonine-protein kinase B-raf OS=Homo sapiens OX=9606 GN=BRAF PE=1 SV=4
786,TRUE,O15162	PLS1_HUMAN,148.54568,3,1592.978,1595.8829,638.7497,1560.1511,1102.9108,1490.3846,2338.2632,2206.8926,3,5,3,3,4,3,2,3,3,Carbamidomethylation,35049.07,Phospholipid scramblase 1 OS=Homo sapiens OX=9606 GN=PLSCR1 PE=1 SV=1
297,TRUE,Q6PIU2	NCEH1_HUMAN,265.2095,14,10022.31,10058.222,8904.023,11035.754,6964.1865,5627.133,8548.292,7577.0493,14,17,17,17,21,9,10,12,11,Carbamidomethylation; Oxidation (M),45807.848,Neutral cholesterol ester hydrolase 1 OS=Homo sapiens OX=9606 GN=NCEH1 PE=1 SV=3
262,TRUE,Q14677	EPN4_HUMAN,254.67786,15,3810.404,2907.9106,3283.7388,5358.037,3222.2866,3240.1907,6992.1553,10524.477,15,13,12,19,19,13,17,19,19,Oxidation (M),68259.44,Clathrin interactor 1 OS=Homo sapiens OX=9606 GN=CLINT1 PE=1 SV=1
385,FALSE,O75914	PAK3_HUMAN,112.54106,3,,,,475.6983,350.42487,241.30891,617.1609,721.2235,3,,,1,5,4,4,3,2,Oxidation (M),62309.62,Serine/threonine-protein kinase PAK 3 OS=Homo sapiens OX=9606 GN=PAK3 PE=1 SV=2
650,TRUE,P12429	ANXA3_HUMAN,149.75,5,,,,292.1496,,,,390.44547,5,,,2,2,,,2,1,,36375.266,Annexin A3 OS=Homo sapiens OX=9606 GN=ANXA3 PE=1 SV=3
216,TRUE,Q5H9R7	PP6R3_HUMAN,266.2821,16,1077.9797,288.2748,1264.4407,3302.9587,6082.286,6069.102,9656.395,11737.457,16,11,2,11,13,18,17,26,26,Oxidation (M),97669.09,Serine/threonine-protein phosphatase 6 regulatory subunit 3 OS=Homo sapiens OX=9606 GN=PPP6R3 PE=1 SV=2
98,TRUE,Q96RT1	ERBIN_HUMAN,293.67236,33,2368.3416,1062.1305,92.95066,1240.0066,644.1588,1307.3691,3478.0833,5566.9917,33,21,23,4,19,16,12,37,31,Oxidation (M),158298.11,Erbin OS=Homo sapiens OX=9606 GN=ERBIN PE=1 SV=2
