# Supplementary material for: Cell-surface tethered promiscuous biotinylators enable comparative small-scale surface proteomic analysis of human extracellular vesicles and cells
Source: eLife journal article supplement (doi:10.7554/elife.73982), 2022-03-04
Supplement: supp [file elife-73982-supp-v1.zip › elife_poa_e73982_Figure_2_figure_supplement_5.pdf]

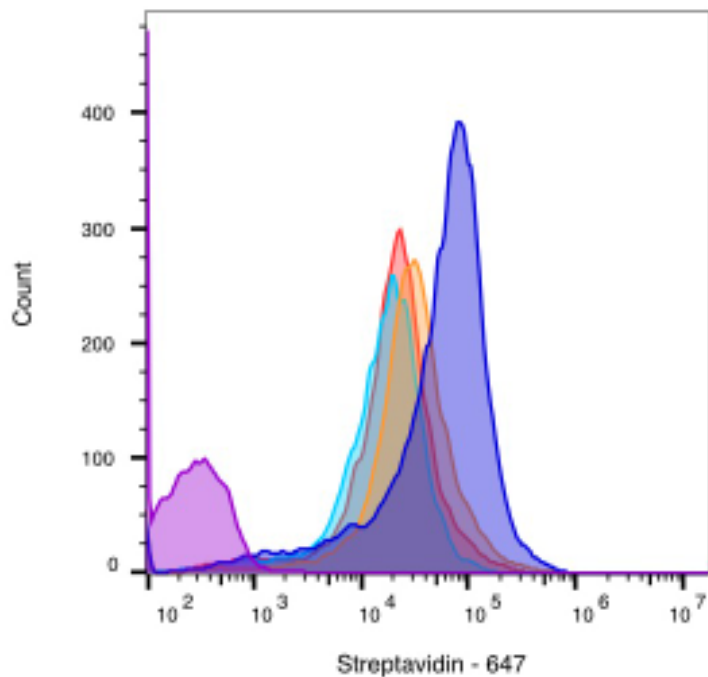

|                  | Sample Name      |
|------------------|------------------|
| Cell only        | Cell only        |
| WGA-HRP          | WGA-HRP          |
| WGA-HRP + GlcNAc | WGA-HRP + GlcNAc |
| HRP              | HRP              |
| HRP + GlcNAc     | HRP + GlcNAc     |
