# Supplementary material for: Cell-surface tethered promiscuous biotinylators enable comparative small-scale surface proteomic analysis of human extracellular vesicles and cells
Source: eLife journal article supplement (doi:10.7554/elife.73982), 2022-03-04
Supplement: supp [file elife-73982-supp-v1.zip › elife_poa_e73982_Figure_2_source_data_2.csv]

Protein Group	Top	Accession	-10LgP	#Peptides	Area WGA 2	Area WGA 1	Area DNA 2	Area DNA 1	Area APEX 2	Area APEX 1	Area HRP 1	Area HRP 2	#Unique	#Spec WGA 2	#Spec WGA 1	#Spec DNA 2	#Spec DNA 1	#Spec APEX 2	#Spec APEX 1	#Spec HRP 1	#Spec HRP 2	PTM	Average Mass	Description
572	TRUE	Q969Q5|RAB24_HUMAN	78.515785	3			1303.5587	955.22125					3		2	1	2						23124.12	Ras-related protein Rab-24 OS=Homo sapiens OX=9606 GN=RAB24 PE=1 SV=1
443	FALSE	P46531|NOTC1_HUMAN	69.60524	2	410.31024	460.20105		199.09398		104.78464			2	2	1		1		1			Oxidation (M)	272504.7	Neurogenic locus notch homolog protein 1 OS=Homo sapiens OX=9606 GN=NOTCH1 PE=1 SV=4
500	TRUE	P11166|GTR1_HUMAN	168.34789	4	9094.059	8548.976	2866.6694	3218.0508	158.5922	1092.8864	127.02141	352.06903	4	5	6	2	2	3	2	4	2	Oxidation (M)	54083.77	Solute carrier family 2, facilitated glucose transporter member 1 OS=Homo sapiens OX=9606 GN=SLC2A1 PE=1 SV=2
602	TRUE	O14735|CDIPT_HUMAN	79.97646	2	175.37653			298.2908				262.63242	2	1		1	1				1	Oxidation (M)	23538.803	CDP-diacylglycerol--inositol 3-phosphatidyltransferase OS=Homo sapiens OX=9606 GN=CDIPT PE=1 SV=1
681	TRUE	Q8NFH5|NUP35_HUMAN	113.85713	2	226.17853	221.33643		223.83975			387.4101	684.0606	2	2	3		3		1	2	2		34773.754	Nucleoporin NUP35 OS=Homo sapiens OX=9606 GN=NUP35 PE=1 SV=1
708	TRUE	P62330|ARF6_HUMAN	69.237755	2	860.9113	1086.3928	606.30347	640.94196	190.41261				2	1	2	2	1	1				Oxidation (M)	20082.152	ADP-ribosylation factor 6 OS=Homo sapiens OX=9606 GN=ARF6 PE=1 SV=2
551	TRUE	Q8WTV0|SCRB1_HUMAN	100.62666	3	3375.501	2740.0625	1488.2584	1343.2716					3	2	4	1	1					Oxidation (M)	60877.855	Scavenger receptor class B member 1 OS=Homo sapiens OX=9606 GN=SCARB1 PE=1 SV=1
390	TRUE	Q8NF37|PCAT1_HUMAN	171.86668	6	3254.4614	2096.5764	5849.6143	1370.0002	497.4278		1669.4225	3152.424	6	5	3	8	6	1	1	3	7		59151.35	Lysophosphatidylcholine acyltransferase 1 OS=Homo sapiens OX=9606 GN=LPCAT1 PE=1 SV=2
331	TRUE	Q9UL52|TM11E_HUMAN	155.56459	7	1839.676	1030.4089		731.9562					6	9	7	5	3						47695.543	Transmembrane protease serine 11E OS=Homo sapiens OX=9606 GN=TMPRSS11E PE=1 SV=2
705	TRUE	P28482|MK01_HUMAN	94.80543	2	1097.6732	1003.34						317.1878	2	1	2						1		41389.703	Mitogen-activated protein kinase 1 OS=Homo sapiens OX=9606 GN=MAPK1 PE=1 SV=3
353	TRUE	P30419|NMT1_HUMAN	174.99261	5		115.73565					887.54724	268.25275	5		1					7	4	Oxidation (M)	56806.18	Glycylpeptide N-tetradecanoyltransferase 1 OS=Homo sapiens OX=9606 GN=NMT1 PE=1 SV=2
628	TRUE	Q7Z4F1|LRP10_HUMAN	89.10014	2		362.15472	184.62755						2		1	4	2					Oxidation (M)	76193.37	Low-density lipoprotein receptor-related protein 10 OS=Homo sapiens OX=9606 GN=LRP10 PE=1 SV=2
283	TRUE	P98194|AT2C1_HUMAN	153.4754	7	324.97092	71.68251	675.9231				371.30267	449.86392	7	3	1	8	2	1	1	4	5	Oxidation (M)	100577.27	Calcium-transporting ATPase type 2C member 1 OS=Homo sapiens OX=9606 GN=ATP2C1 PE=1 SV=3
240	TRUE	O43815|STRN_HUMAN	204.36627	9	1901.7462	2792.6406	1269.1373			589.7975	1838.5012	3659.8013	9	5	7	4	5	2	3	6	11	Carbamidomethylation	86132.11	Striatin OS=Homo sapiens OX=9606 GN=STRN PE=1 SV=4
258	TRUE	P33121|ACSL1_HUMAN	156.15205	7			8302.81	7620.285					7			10	14					Deamidation (NQ); Oxidation (M); Acetylation (N-term)	77943.33	Long-chain-fatty-acid--CoA ligase 1 OS=Homo sapiens OX=9606 GN=ACSL1 PE=1 SV=1
330	TRUE	Q08554|DSC1_HUMAN	163.15887	7	4821.968	3997.3633	333.10995	544.5712	276.3875	848.0235	2503.0107	1153.2383	7	10	5	1	3	2	2	7	2		99986.83	Desmocollin-1 OS=Homo sapiens OX=9606 GN=DSC1 PE=1 SV=2
188	TRUE	Q92692|NECT2_HUMAN	241.52011	10	25396.95	21621.416	14939.798	10427.608			462.13364	552.9564	10	27	22	16	10			3	1	Oxidation (M); Deamidation (NQ); Carbamidomethylation	57742.03	Nectin-2 OS=Homo sapiens OX=9606 GN=NECTIN2 PE=1 SV=1
27	FALSE	P54652|HSP72_HUMAN	269.32147	17	39533.98	11360.276	12883.305	9978.449	5029.7476	20486.236	24124.303	18811.736	6	33	30	23	19	23	28	26	31	Deamidation (NQ)	70020.97	Heat shock-related 70 kDa protein 2 OS=Homo sapiens OX=9606 GN=HSPA2 PE=1 SV=1
178	TRUE	P01130|LDLR_HUMAN	261.63647	11	42388.727	33436.64	42910.375	31999.46	19888.371	23382.66	29808.568	37923.18	10	29	24	31	22	21	32	25	28	Oxidation (M); Carbamidomethylation	95376.016	Low-density lipoprotein receptor OS=Homo sapiens OX=9606 GN=LDLR PE=1 SV=1
233	TRUE	P04626|ERBB2_HUMAN	201.21513	9	1648.6152	3290.963	282.265						8	14	13	6	3	4	2	2	2	Oxidation (M); Deamidation (NQ)	137910.48	Receptor tyrosine-protein kinase erbB-2 OS=Homo sapiens OX=9606 GN=ERBB2 PE=1 SV=1
538	TRUE	Q02487|DSC2_HUMAN	117.66232	3	661.7295		256.4662	176.75844					3	2	1	3	1		1	1			99961.68	Desmocollin-2 OS=Homo sapiens OX=9606 GN=DSC2 PE=1 SV=1
552	TRUE	Q15836|VAMP3_HUMAN	128.65614	2			1755.7532	3248.7217					2			6	4					Oxidation (M)	11309.086	Vesicle-associated membrane protein 3 OS=Homo sapiens OX=9606 GN=VAMP3 PE=1 SV=3
315	TRUE	P61225|RAP2B_HUMAN	185.98808	7	3180.2947	2683.8335	6786.246	5811.7646	542.1319		1238.2898	2377.1743	3	8	10	14	9	4	7	6	6	Carbamidomethylation; Oxidation (M)	20504.354	Ras-related protein Rap-2b OS=Homo sapiens OX=9606 GN=RAP2B PE=1 SV=1
225	TRUE	Q9UKV3|ACINU_HUMAN	196.39842	10	4092.933	2859.0203	5607.6	5934.772	15162.853	1098.5786	4176.524	5356.6846	10	13	8	5	8	11	7	7	11	Carbamidomethylation; Acetylation (N-term); Oxidation (M)	151861.52	Apoptotic chromatin condensation inducer in the nucleus OS=Homo sapiens OX=9606 GN=ACIN1 PE=1 SV=2
462	TRUE	Q9ULV3|CIZ1_HUMAN	107.746895	4									4	3	1						2		100045.22	Cip1-interacting zinc finger protein OS=Homo sapiens OX=9606 GN=CIZ1 PE=1 SV=2
293	TRUE	Q9UL25|RAB21_HUMAN	219.01697	8	4680.513	2125.6594	7415.0728	8169.659	512.96875	1219.7086	1514.1721	3713.8416	7	11	6	13	12	6	6	5	8	Oxidation (M)	24347.564	Ras-related protein Rab-21 OS=Homo sapiens OX=9606 GN=RAB21 PE=1 SV=3
662	TRUE	O00299|CLIC1_HUMAN	100.55682	2	1817.3057	1115.1031				268.07452		830.5856	2	2	1		2		1	3	3		26922.723	Chloride intracellular channel protein 1 OS=Homo sapiens OX=9606 GN=CLIC1 PE=1 SV=4
537	TRUE	P24666|PPAC_HUMAN	118.832756	3	748.9237	2912.9622	1453.3207	1456.3522	483.42816		2933.5615	1867.5032	3	2	3	1	2	1		4	4		18042.479	Low molecular weight phosphotyrosine protein phosphatase OS=Homo sapiens OX=9606 GN=ACP1 PE=1 SV=3
123	TRUE	P22223|CADH3_HUMAN	272.64832	17	27081.703	24159.771	20004.531	9982.131	4314.755	10211.496	11619.988	14737.786	17	22	25	23	18	18	18	16	16	Oxidation (M); Deamidation (NQ); Carbamidomethylation	91418.4	Cadherin-3 OS=Homo sapiens OX=9606 GN=CDH3 PE=1 SV=2
593	TRUE	Q8NAN2|MIGA1_HUMAN	153.6554	3	4066.6711	2213.4646	2247.7717	1588.1296	932.05035	558.061	2495.7856	3541.7166	3	6	4	6	3	2	2	6	6		71005.76	Mitoguardin 1 OS=Homo sapiens OX=9606 GN=MIGA1 PE=1 SV=1
422	FALSE	P06241|FYN_HUMAN	85.65254	3	2316.4329	1214.6835	495.51797	1159.0266	213.85309	595.51825	830.9654	350.8543	3	2	1	1	1	2	3	1	1		60761.9	Tyrosine-protein kinase Fyn OS=Homo sapiens OX=9606 GN=FYN PE=1 SV=3
583	TRUE	P50570|DYN2_HUMAN	117.81975	3	894.5318	905.63367					227.35385	640.0823	3	2	3	2	1	1	1	1	2		98064.305	Dynamin-2 OS=Homo sapiens OX=9606 GN=DNM2 PE=1 SV=2
279	TRUE	P49023|PAXI_HUMAN	196.12227	6	1681.1866	303.3227		286.8191		109.80004	2103.3684	2448.5022	6	7	5		1	2	3	8	12	Oxidation (M); Acetylation (N-term); Deamidation (NQ); Carbamidomethylation	64505.305	Paxillin OS=Homo sapiens OX=9606 GN=PXN PE=1 SV=3
530	TRUE	Q96BM9|ARL8A_HUMAN	144.69981	3			909.7572	1076.6069				329.91406	3			4	4				1		21415.89	ADP-ribosylation factor-like protein 8A OS=Homo sapiens OX=9606 GN=ARL8A PE=1 SV=1
29	TRUE	O75165|DJC13_HUMAN	362.85217	47	24513.113	25259.21	6166.8447	7222.7236	1778.2905	4007.3245	19858.053	25517.742	47	49	49	22	27	11	16	51	58	Oxidation (M); Deamidation (NQ); Carbamidomethylation	254414.89	DnaJ homolog subfamily C member 13 OS=Homo sapiens OX=9606 GN=DNAJC13 PE=1 SV=5
540	TRUE	Q969P0|IGSF8_HUMAN	102.571144	3	362.47208		435.38812	222.36867					3	3	2	3	1						65034.24	Immunoglobulin superfamily member 8 OS=Homo sapiens OX=9606 GN=IGSF8 PE=1 SV=1
496	TRUE	Q96KP1|EXOC2_HUMAN	100.44622	4		142.56711					183.26656	1417.4105	4		1				1	1	3		104066.266	Exocyst complex component 2 OS=Homo sapiens OX=9606 GN=EXOC2 PE=1 SV=1
365	FALSE	P05771|KPCB_HUMAN	89.525	2	890.2864	632.05817	730.339	619.2769				997.7521	2	2	1	1	2				3	Oxidation (M)	76868.95	Protein kinase C beta type OS=Homo sapiens OX=9606 GN=PRKCB PE=1 SV=4
599	TRUE	Q8IWU2|LMTK2_HUMAN	80.17775	2		274.98535							2	2	1	1			1	1	1		164900.47	Serine/threonine-protein kinase LMTK2 OS=Homo sapiens OX=9606 GN=LMTK2 PE=1 SV=2
9	TRUE	P13645|K1C10_HUMAN	428.0886	53	716860.5	377412.56	89388.3	175455.62	174451.7	202878.45	745492.06	512165.56	50	180	148	67	92	104	106	176	154	Acetylation (N-term); Oxidation (M); Carbamidomethylation; Deamidation (NQ)	58827.086	Keratin, type I cytoskeletal 10 OS=Homo sapiens OX=9606 GN=KRT10 PE=1 SV=6
239	TRUE	Q9UHB6|LIMA1_HUMAN	193.38751	9	4969.4956	3532.8865	3420.522	4885.0996	255.32474	1569.8287	4230.521	5584.153	9	8	9	7	9	7	8	8	12	Deamidation (NQ); Oxidation (M)	85225.55	LIM domain and actin-binding protein 1 OS=Homo sapiens OX=9606 GN=LIMA1 PE=1 SV=1
441	TRUE	O95359|TACC2_HUMAN	109.2724	3	3964.5808	3298.231	2360.271	1850.2362	1438.2974	2833.61	1839.8457	4549.951	3	5	7	6	4	5	6	5	5	Deamidation (NQ); Oxidation (M)	309427.4	Transforming acidic coiled-coil-containing protein 2 OS=Homo sapiens OX=9606 GN=TACC2 PE=1 SV=3
409	TRUE	Q9UNF0|PACN2_HUMAN	144.26846	5							3899.365	1098.0645	5		1					6	2		55738.633	Protein kinase C and casein kinase substrate in neurons protein 2 OS=Homo sapiens OX=9606 GN=PACSIN2 PE=1 SV=2
481	TRUE	P11279|LAMP1_HUMAN	134.20564	4		277.33337	8141.807	14325.325					4	1	1	6	13						44882.35	Lysosome-associated membrane glycoprotein 1 OS=Homo sapiens OX=9606 GN=LAMP1 PE=1 SV=3
68	TRUE	Q13308|PTK7_HUMAN	283.05383	26	64898.637	46813.246	28180.3	28257.797	414.97287	1549.955	1205.9935	2676.663	26	44	45	23	30	2	11	4	9	Oxidation (M); Carbamidomethylation	118391.63	Inactive tyrosine-protein kinase 7 OS=Homo sapiens OX=9606 GN=PTK7 PE=1 SV=2
588	TRUE	Q13443|ADAM9_HUMAN	93.13628	3	415.2334	1396.3281	150.2459						3	1	3	3							90555.98	Disintegrin and metalloproteinase domain-containing protein 9 OS=Homo sapiens OX=9606 GN=ADAM9 PE=1 SV=1
659	TRUE	P01834|IGKC_HUMAN	139.44156	2	2455.984								2	7	2	1				2	1		11765.038	Immunoglobulin kappa constant OS=Homo sapiens OX=9606 GN=IGKC PE=1 SV=2
647	TRUE	Q96GZ6|S41A3_HUMAN	92.02918	2			369.57327	295.71088					2			1	3						54766.688	Solute carrier family 41 member 3 OS=Homo sapiens OX=9606 GN=SLC41A3 PE=1 SV=2
127	TRUE	Q15075|EEA1_HUMAN	240.01956	18	1977.011	1521.658	556.3178	1162.0763			2717.4678	2742.881	18	8	10	6	7			13	15	Deamidation (NQ)	162465.75	Early endosome antigen 1 OS=Homo sapiens OX=9606 GN=EEA1 PE=1 SV=2
201	TRUE	P04792|HSPB1_HUMAN	232.89124	11	36399.28	37309.305	13891.146	12994.942	17360.275	12529.184	28128.816	30818.887	11	19	18	15	13	19	13	21	17	Oxidation (M)	22782.52	Heat shock protein beta-1 OS=Homo sapiens OX=9606 GN=HSPB1 PE=1 SV=2
324	TRUE	O00264|PGRC1_HUMAN	184.54756	7	3444.8162	2723.6978	14017.866	13269.785	958.141	1540.0466	2023.8217	2565.6592	7	5	1	20	16	3	4	1	2	Carbamidomethylation; Oxidation (M)	21671.154	Membrane-associated progesterone receptor component 1 OS=Homo sapiens OX=9606 GN=PGRMC1 PE=1 SV=3
32	TRUE	P35222|CTNB1_HUMAN	366.72256	32	122485.21	114320.336	104212	83913.16	19924.389	28470.602	25693.734	37788.29	28	93	94	87	76	32	42	35	41	Acetylation (N-term); Oxidation (M); Deamidation (NQ); Carbamidomethylation	85496.58	Catenin beta-1 OS=Homo sapiens OX=9606 GN=CTNNB1 PE=1 SV=1
206	TRUE	O94973|AP2A2_HUMAN	229.56602	10			3829.8828	1838.0227					7	2	3	14	13			1	2	Oxidation (M)	103960.414	AP-2 complex subunit alpha-2 OS=Homo sapiens OX=9606 GN=AP2A2 PE=1 SV=2
52	FALSE	Q58FF7|H90B3_HUMAN	242.42503	16	9239.092	18664.053	3607.4602	6006.45	3165.6614	4811.9565	30500.965	33218.13	6	21	29	16	14	12	15	46	42	Oxidation (M)	68324.836	Putative heat shock protein HSP 90-beta-3 OS=Homo sapiens OX=9606 GN=HSP90AB3P PE=5 SV=1
170	TRUE	P21281|VATB2_HUMAN	227.96124	11	11073.167	9001.024	6150.21	8199.073	2681.15	4108.383	6430.248	12241.621	11	8	8	10	9	5	5	15	16	Oxidation (M)	56500.727	V-type proton ATPase subunit B, brain isoform OS=Homo sapiens OX=9606 GN=ATP6V1B2 PE=1 SV=3
384	TRUE	Q9UKA4|AKA11_HUMAN	167.95992	6	103.295334							630.8153	6	2	3			1		3	4		210512.22	A-kinase anchor protein 11 OS=Homo sapiens OX=9606 GN=AKAP11 PE=1 SV=1
34	TRUE	P35221|CTNA1_HUMAN	349.4213	38	89092.35	69008.34	102608.17	94948.24	12280.928	21881.586	28499.693	34106.848	30	69	71	85	85	36	41	40	51	Carbamidomethylation; Oxidation (M); Deamidation (NQ); Acetylation (N-term)	100071.266	Catenin alpha-1 OS=Homo sapiens OX=9606 GN=CTNNA1 PE=1 SV=1
586	TRUE	Q16563|SYPL1_HUMAN	88.79103	3	2662.8777	1493.3889	3269.888	1820.8711					3	2	1	3	2					Carbamidomethylation	28565.277	Synaptophysin-like protein 1 OS=Homo sapiens OX=9606 GN=SYPL1 PE=1 SV=1
243	TRUE	Q92673|SORL_HUMAN	201.27777	9	816.09015	883.9719	2636.3354	3182.0146					9	3	6	9	11					Oxidation (M)	248426.36	Sortilin-related receptor OS=Homo sapiens OX=9606 GN=SORL1 PE=1 SV=2
348	TRUE	Q8TCT9|HM13_HUMAN	170.83202	5	9134.249	6200.666	20803.488	15661.612	1382.0273	3135.202	2386.8735	6346.1494	5	11	11	15	13	7	9	9	8	Oxidation (M)	41488.336	Minor histocompatibility antigen H13 OS=Homo sapiens OX=9606 GN=HM13 PE=1 SV=1
522	TRUE	Q13671|RIN1_HUMAN	112.33891	3								668.49274	3					1			2		84098.9	Ras and Rab interactor 1 OS=Homo sapiens OX=9606 GN=RIN1 PE=1 SV=4
608	TRUE	Q96MU7|YTDC1_HUMAN	79.413864	2								1107.9193	2						1		2		84700.33	YTH domain-containing protein 1 OS=Homo sapiens OX=9606 GN=YTHDC1 PE=1 SV=3
33	TRUE	P13647|K2C5_HUMAN	334.18478	46	194178.8	39568.285	14621.144	48341.742	28902.271	32870.402	211427.8	51161.098	32	100	46	31	59	49	46	125	65	Oxidation (M); Acetylation (N-term); Deamidation (NQ); Carbamidomethylation	62378.34	Keratin, type II cytoskeletal 5 OS=Homo sapiens OX=9606 GN=KRT5 PE=1 SV=3
147	TRUE	Q8IWT6|LRC8A_HUMAN	237.80762	15	13340.08	11480.922	9826.443	6318.708				561.368	15	14	20	14	12	1		1	2	Oxidation (M)	94198.734	Volume-regulated anion channel subunit LRRC8A OS=Homo sapiens OX=9606 GN=LRRC8A PE=1 SV=1
546	TRUE	O75122|CLAP2_HUMAN	118.41435	3	679.7562	803.53064					1028.4764	232.90576	3	4	3					3	3		141063.66	CLIP-associating protein 2 OS=Homo sapiens OX=9606 GN=CLASP2 PE=1 SV=3
444	TRUE	P01040|CYTA_HUMAN	152.22398	5	4408.4927	3168.6187	1082.1122	350.94595	1085.1414	1205.7793	4518.4087	706.20935	5	6	4	2	4	2	4	7	2		11006.488	Cystatin-A OS=Homo sapiens OX=9606 GN=CSTA PE=1 SV=1
672	TRUE	O60779|S19A2_HUMAN	67.84922	2	584.03357	140.40697							2	4	1								55400.074	Thiamine transporter 1 OS=Homo sapiens OX=9606 GN=SLC19A2 PE=1 SV=2
18	TRUE	Q02952|AKA12_HUMAN	420.2225	62	54116.12	44663.5	49136.62	45612.867	13014.59	21410.297	33845.797	45693.453	62	105	87	103	99	64	81	84	100	Carbamidomethylation; Oxidation (M)	191481.78	A-kinase anchor protein 12 OS=Homo sapiens OX=9606 GN=AKAP12 PE=1 SV=4
200	TRUE	P40763|STAT3_HUMAN	182.19121	9	562.2957	413.81412					692.5441	816.9281	9	3	6				1	6	7	Deamidation (NQ); Oxidation (M)	88067.79	Signal transducer and activator of transcription 3 OS=Homo sapiens OX=9606 GN=STAT3 PE=1 SV=2
668	TRUE	Q9NZM3|ITSN2_HUMAN	82.46043	2									2							1	2		193461.45	Intersectin-2 OS=Homo sapiens OX=9606 GN=ITSN2 PE=1 SV=3
579	TRUE	P42356|PI4KA_HUMAN	118.13271	3	541.752	533.662				86.98107		526.79944	3	3	3		1		1	1	1		236830.45	Phosphatidylinositol 4-kinase alpha OS=Homo sapiens OX=9606 GN=PI4KA PE=1 SV=4
460	TRUE	Q14254|FLOT2_HUMAN	139.32278	4			3220.7412						4			4	2		1				47064.16	Flotillin-2 OS=Homo sapiens OX=9606 GN=FLOT2 PE=1 SV=2
208	TRUE	O95292|VAPB_HUMAN	205.04994	7	6405.7217	5586.454	23003.861	28110.422	1380.7122	2734.3992	3015.2695	3422.163	6	10	12	16	22	6	10	8	12	Carbamidomethylation; Deamidation (NQ); Oxidation (M)	27228.387	Vesicle-associated membrane protein-associated protein B/C OS=Homo sapiens OX=9606 GN=VAPB PE=1 SV=3
432	TRUE	P13747|HLAE_HUMAN	155.49477	5	958.50696		350.61868	983.0117					2	5	3	4	6	3	2	1	2	Acetylation (N-term)	40057.566	HLA class I histocompatibility antigen, alpha chain E OS=Homo sapiens OX=9606 GN=HLA-E PE=1 SV=4
271	TRUE	Q5D862|FILA2_HUMAN	186.03835	8	2070.7065	1947.2468		66.937386			2150.124	2552.644	8	7	9		3	3	1	2	5	Deamidation (NQ)	248072.58	Filaggrin-2 OS=Homo sapiens OX=9606 GN=FLG2 PE=1 SV=1
210	TRUE	O95782|AP2A1_HUMAN	217.9663	11		292.8399	2281.4414	3144.358					8	4	4	11	13			1	2	Oxidation (M); Carbamidomethylation	107545.88	AP-2 complex subunit alpha-1 OS=Homo sapiens OX=9606 GN=AP2A1 PE=1 SV=3
325	TRUE	O43493|TGON2_HUMAN	164.20853	7			680.83673	698.80493					7			10	10						45879.57	Trans-Golgi network integral membrane protein 2 OS=Homo sapiens OX=9606 GN=TGOLN2 PE=1 SV=4
625	TRUE	Q08722|CD47_HUMAN	84.89276	2	6946.1724	5502.73	6347.6006	4187.939					2	4	3	3	2						35213.637	Leukocyte surface antigen CD47 OS=Homo sapiens OX=9606 GN=CD47 PE=1 SV=1
610	TRUE	Q92581|SL9A6_HUMAN	63.227127	2				1402.4498					2				2					Oxidation (M)	74161.63	Sodium/hydrogen exchanger 6 OS=Homo sapiens OX=9606 GN=SLC9A6 PE=1 SV=2
226	TRUE	Q6P1M0|S27A4_HUMAN	196.52519	10	1306.253	3603.5073	4264.9463	6425.6084	678.9243	962.5765	1355.3774		8	1	5	7	6	4	2	3	2	Oxidation (M); Carbamidomethylation	72064.24	Long-chain fatty acid transport protein 4 OS=Homo sapiens OX=9606 GN=SLC27A4 PE=1 SV=1
527	TRUE	Q9NV96|CC50A_HUMAN	140.94609	3	774.48267	2702.7473	363.5746	230.41818					3	3	5	2	1					Carbamidomethylation	40683.66	Cell cycle control protein 50A OS=Homo sapiens OX=9606 GN=TMEM30A PE=1 SV=1
428	TRUE	Q9Y625|GPC6_HUMAN	156.66316	5	3931.392	1761.6848	3595.0461	1829.4701					4	11	11	9	3					Oxidation (M)	62735.52	Glypican-6 OS=Homo sapiens OX=9606 GN=GPC6 PE=1 SV=1
312	TRUE	P0CG48|UBC_HUMAN	195.25371	6	166724.55	159537.78	118344.57	111537.39	30530.092	47319.48	71351.72	86326.44	6	29	35	30	24	17	19	23	19	Deamidation (NQ)	77038.61	Polyubiquitin-C OS=Homo sapiens OX=9606 GN=UBC PE=1 SV=3
407	TRUE	Q9UJU6|DBNL_HUMAN	147.1359	5	255.7062	152.37773					2010.568	2816.2876	5	1	2					6	5	Oxidation (M)	48207.27	Drebrin-like protein OS=Homo sapiens OX=9606 GN=DBNL PE=1 SV=1
277	TRUE	P33527|MRP1_HUMAN	184.19579	8	482.5839		2689.9907	1282.8331					8	1	1	9	7			1		Oxidation (M)	171591.17	Multidrug resistance-associated protein 1 OS=Homo sapiens OX=9606 GN=ABCC1 PE=1 SV=3
280	TRUE	P62491|RB11A_HUMAN	167.6539	8	5641.5117	6242.0493	30454.69	26398.16	784.9565	1133.9253	3073.2034	4161.813	8	5	6	11	17	2	3	3	4	Acetylation (N-term)	24393.518	Ras-related protein Rab-11A OS=Homo sapiens OX=9606 GN=RAB11A PE=1 SV=3
273	TRUE	Q9NUT2|MITOS_HUMAN	200.99417	9	1756.9915	2579.38	5181.189	3244.4058	692.6527	334.12234	2630.6792	3097.675	9	10	9	8	7	3	4	6	7	Oxidation (M)	79988.836	Mitochondrial potassium channel ATP-binding subunit OS=Homo sapiens OX=9606 GN=ABCB8 PE=1 SV=3
468	TRUE	Q9Y5V3|MAGD1_HUMAN	165.77588	4	2076.9766	1509.1276		743.1012	905.53156	1028.794	1758.8801	2012.1509	4	6	4	1	3	3	4	3	5		86160.92	Melanoma-associated antigen D1 OS=Homo sapiens OX=9606 GN=MAGED1 PE=1 SV=3
614	TRUE	P48426|PI42A_HUMAN	62.34645	2							396.27386		2	1						1			46224.598	Phosphatidylinositol 5-phosphate 4-kinase type-2 alpha OS=Homo sapiens OX=9606 GN=PIP4K2A PE=1 SV=2
345	TRUE	Q9Y6N7|ROBO1_HUMAN	185.56383	7	4259.629	4252.8965	2738.0283	1362.1294					7	10	8	3	5	1					180929.64	Roundabout homolog 1 OS=Homo sapiens OX=9606 GN=ROBO1 PE=1 SV=1
89	TRUE	P35232|PHB_HUMAN	311.8737	22	16625.225	20669.766	234682.61	264564.66	4909.7446	8130.909	14815.499	11174.45	22	14	21	55	65	13	15	21	15	Deamidation (NQ); Carbamidomethylation	29804.098	Prohibitin OS=Homo sapiens OX=9606 GN=PHB PE=1 SV=1
505	TRUE	Q14141|SEPT6_HUMAN	108.42908	3	477.9317	562.6265					1140.1935	574.12787	3	1	1					4	4		49716.645	Septin-6 OS=Homo sapiens OX=9606 GN=SEPTIN6 PE=1 SV=4
513	TRUE	Q9BZQ8|NIBA1_HUMAN	103.18434	3	144.51485							368.6546	3	2	1						1		103134.68	Protein Niban 1 OS=Homo sapiens OX=9606 GN=NIBAN1 PE=1 SV=1
3	TRUE	Q9UPN3|MACF1_HUMAN	453.07346	120	149567.98	63600.42	31325.707	27842.514	15912.495	303521.2	308646.22	148888.12	113	150	142	74	88	66	84	125	162	Deamidation (NQ); Oxidation (M); Carbamidomethylation	838307.6	Microtubule-actin cross-linking factor 1, isoforms 1/2/3/5 OS=Homo sapiens OX=9606 GN=MACF1 PE=1 SV=4
559	TRUE	P07858|CATB_HUMAN	78.343765	3		169.94594							3		4						1	Oxidation (M)	37821.58	Cathepsin B OS=Homo sapiens OX=9606 GN=CTSB PE=1 SV=3
262	TRUE	O14786|NRP1_HUMAN	229.30237	9	1972.7253	2215.4976	6039.517	2291.39	151.64337	979.7223	470.7735	888.91516	9	13	8	14	13	1	4	1	4	Oxidation (M)	103134.336	Neuropilin-1 OS=Homo sapiens OX=9606 GN=NRP1 PE=1 SV=3
195	TRUE	P04920|B3A2_HUMAN	206.34163	12	4024.1636	5133.0713	5269.1963	4818.798				273.2224	12	9	13	12	12				2	Oxidation (M)	137009.31	Anion exchange protein 2 OS=Homo sapiens OX=9606 GN=SLC4A2 PE=1 SV=4
209	TRUE	Q86SQ4|AGRG6_HUMAN	180.17502	8	2832.125	4438.982	1707.7433	1478.6925	1350.8997	628.8464	637.3024	1567.5349	8	7	9	3	11	3	2	2	4	Deamidation (NQ)	136694.61	Adhesion G-protein coupled receptor G6 OS=Homo sapiens OX=9606 GN=ADGRG6 PE=1 SV=3
246	TRUE	P61020|RAB5B_HUMAN	198.41057	7	1467.0294	465.42078	5148.4507	5880.611			353.5327	1133.2988	4	10	9	17	20	5	5	5	8	Oxidation (M)	23706.803	Ras-related protein Rab-5B OS=Homo sapiens OX=9606 GN=RAB5B PE=1 SV=1
562	TRUE	Q13616|CUL1_HUMAN	119.20716	3	1048.3368	1010.816	203.53494			160.93747		1238.396	3	3	4	2	4		1		3		89678.52	Cullin-1 OS=Homo sapiens OX=9606 GN=CUL1 PE=1 SV=2
20	TRUE	Q00610|CLH1_HUMAN	388.08145	49	93347.1	81905.01	63466.508	72347.63	9327.984	21668.508	73486.05	100694.82	49	85	88	77	91	27	47	88	93	Oxidation (M); Deamidation (NQ); Carbamidomethylation	191614.62	Clathrin heavy chain 1 OS=Homo sapiens OX=9606 GN=CLTC PE=1 SV=5
47	FALSE	P11532|DMD_HUMAN	126.29362	3	584.93634	279.7187				134.0893	308.92862	630.4297	3	3	3				1	2	2	Oxidation (M)	426749.62	Dystrophin OS=Homo sapiens OX=9606 GN=DMD PE=1 SV=3
352	TRUE	Q13641|TPBG_HUMAN	175.66628	5	3427.9873	3601.7983	706.85455	670.0172					5	7	10	7	3					Oxidation (M)	46031.86	Trophoblast glycoprotein OS=Homo sapiens OX=9606 GN=TPBG PE=1 SV=1
47	TRUE	P46939|UTRO_HUMAN	304.04193	38	9657.281	9033.456	1210.9601	2220.747	354.92184	2720.3247	5137.1646	8742.666	38	37	41	7	13	7	21	26	36	Oxidation (M)	394466.2	Utrophin OS=Homo sapiens OX=9606 GN=UTRN PE=1 SV=2
173	TRUE	O75581|LRP6_HUMAN	216.01108	12	6503.6943	5314.8174	1285.6309	1873.3385			174.7647	872.48785	12	15	12	5	4		1	1	4	Oxidation (M); Deamidation (NQ)	180429.34	Low-density lipoprotein receptor-related protein 6 OS=Homo sapiens OX=9606 GN=LRP6 PE=1 SV=2
39	TRUE	P46821|MAP1B_HUMAN	369.56085	39	12013.425	15319.233	820.8194			2158.2659	32935.574	35487.11	39	28	44	6	1	5	14	56	57	Oxidation (M); Deamidation (NQ)	270634.4	Microtubule-associated protein 1B OS=Homo sapiens OX=9606 GN=MAP1B PE=1 SV=2
501	TRUE	Q8IXS6|PALM2_HUMAN	129.57086	4	722.67725	681.02734	430.00708	610.75665		175.27216	527.0942	768.92035	4	2	2	2	3	1	3	4	4		42185.168	Paralemmin-2 OS=Homo sapiens OX=9606 GN=PALM2 PE=1 SV=3
37	TRUE	P68104|EF1A1_HUMAN	388.9692	29	521668.4	515334.8	302141.88	253436.78	225378.9	307860.84	354509.4	423187.38	29	192	145	101	100	89	115	125	137	Carbamidomethylation; Deamidation (NQ); Oxidation (M)	50140.86	Elongation factor 1-alpha 1 OS=Homo sapiens OX=9606 GN=EEF1A1 PE=1 SV=1
82	TRUE	P78310|CXAR_HUMAN	275.6692	16	119416.945	141323.42	79895.87	65120.76	878.8608	2465.4045	1825.0891	4688.862	16	65	72	53	47	7	14	11	12	Oxidation (M)	40029.89	Coxsackievirus and adenovirus receptor OS=Homo sapiens OX=9606 GN=CXADR PE=1 SV=1
477	TRUE	O15121|DEGS1_HUMAN	167.2184	3	2660.9785	2400.399	5582.056	4935.7563	293.69302	366.21964	1398.3346	2920.1929	3	5	8	6	11	2	3	4	9	Oxidation (M)	37866.027	Sphingolipid delta(4)-desaturase DES1 OS=Homo sapiens OX=9606 GN=DEGS1 PE=1 SV=1
26	TRUE	Q9BSJ8|ESYT1_HUMAN	392.9599	44	99251.72	106216.25	102376.18	88714.625	24203.773	44175.758	70183.02	90785.92	44	78	84	72	78	45	51	83	72	Deamidation (NQ); Carbamidomethylation; Oxidation (M)	122856.445	Extended synaptotagmin-1 OS=Homo sapiens OX=9606 GN=ESYT1 PE=1 SV=1
130	TRUE	Q99623|PHB2_HUMAN	293.7595	15	34145.938	30786.582	281551.78	240355.53	6932.34	15950.092	28204.979	27269.064	15	30	25	75	48	22	23	23	28	Oxidation (M); Deamidation (NQ)	33296.38	Prohibitin-2 OS=Homo sapiens OX=9606 GN=PHB2 PE=1 SV=2
669	TRUE	P35240|MERL_HUMAN	54.735214	2			177.08716						2	1	1	1						Oxidation (M)	69690.16	Merlin OS=Homo sapiens OX=9606 GN=NF2 PE=1 SV=1
256	TRUE	P17706|PTN2_HUMAN	177.56194	8	2459.3196	2355.6904	2355.2039	1455.4701		87.5882	1137.8372	1356.9585	8	6	12	9	7		1	6	6	Oxidation (M)	48473.266	Tyrosine-protein phosphatase non-receptor type 2 OS=Homo sapiens OX=9606 GN=PTPN2 PE=1 SV=2
186	TRUE	P04899|GNAI2_HUMAN	230.64575	11	5872.8765	5518.1387	10038.793	10235.488	1129.4824		2391.463	3447.5635	5	13	14	16	22	6	4	9	10	Oxidation (M); Carbamidomethylation	40450.902	Guanine nucleotide-binding protein G(i) subunit alpha-2 OS=Homo sapiens OX=9606 GN=GNAI2 PE=1 SV=3
63	TRUE	Q5T9A4|ATD3B_HUMAN	261.63736	21	35798.95	29958.848	95235.625	87321.125	9372.153	12020.093	20494.69	28991.387	21	29	23	56	48	9	9	18	17	Deamidation (NQ); Oxidation (M)	72572.92	ATPase family AAA domain-containing protein 3B OS=Homo sapiens OX=9606 GN=ATAD3B PE=1 SV=1
158	TRUE	P22413|ENPP1_HUMAN	248.89668	13	15050.8	15060.238	6172.6187	5625.992					13	29	26	9	12					Oxidation (M)	104924.47	Ectonucleotide pyrophosphatase/phosphodiesterase family member 1 OS=Homo sapiens OX=9606 GN=ENPP1 PE=1 SV=2
62	TRUE	P23396|RS3_HUMAN	317.3369	25	320508.78	342434.25	221050.31	207436.73	191986.31	240196.47	244291.81	259842.7	25	90	92	68	56	68	82	83	82	Oxidation (M); Deamidation (NQ); Carbamidomethylation	26688.31	40S ribosomal protein S3 OS=Homo sapiens OX=9606 GN=RPS3 PE=1 SV=2
319	FALSE	Q6NZ63|STEAL_HUMAN	72.56514	2	1869.009	1688.7632	1892.012	1345.9711			553.41223	1084.3198	2	2	2	1	2			1	1		28814.695	STEAP family member 1B OS=Homo sapiens OX=9606 GN=STEAP1B PE=1 SV=1
153	TRUE	O14974|MYPT1_HUMAN	219.21005	14	3141.3428	2684.4675		407.87314	183.85754	313.27637	3683.8516	5457.4644	14	8	12		2	1	2	11	12	Oxidation (M)	115280.71	Protein phosphatase 1 regulatory subunit 12A OS=Homo sapiens OX=9606 GN=PPP1R12A PE=1 SV=1
335	TRUE	Q9H0H5|RGAP1_HUMAN	175.71742	6	1534.9431	3135.5615	411.01862	1918.916	673.475	1432.9534	2814.498	2811.5947	6	8	7	2	10	7	5	8	5	Oxidation (M)	71026.53	Rac GTPase-activating protein 1 OS=Homo sapiens OX=9606 GN=RACGAP1 PE=1 SV=1
76	TRUE	P14625|ENPL_HUMAN	293.6142	24	15497.286	15442.324	28439.086	27693.396	7897.2065	17771.791	18581.158	19736.676	23	26	24	29	32	24	28	33	28	Deamidation (NQ); Carbamidomethylation; Oxidation (M)	92468.86	Endoplasmin OS=Homo sapiens OX=9606 GN=HSP90B1 PE=1 SV=1
295	TRUE	Q16181|SEPT7_HUMAN	188.1556	7	1462.1208	1919.2657	261.70505	725.2485			2599.504	4133.375	7	4	6	4	2		1	6	9	Deamidation (NQ)	50679.938	Septin-7 OS=Homo sapiens OX=9606 GN=SEPTIN7 PE=1 SV=2
254	TRUE	P63092|GNAS2_HUMAN	198.0572	8	2186.406	888.91235	6919.8096	7519.584		104.35363	532.3558	557.4383	6	12	9	15	13	4	3	6	10	Oxidation (M)	45664.58	Guanine nucleotide-binding protein G(s) subunit alpha isoforms short OS=Homo sapiens OX=9606 GN=GNAS PE=1 SV=1
21	TRUE	P07814|SYEP_HUMAN	368.4441	47	44883.613	45676.02	20519.889	11547.496	17750.357	20673.082	45996.074	54655.07	47	60	74	39	39	38	51	78	67	Oxidation (M); Carbamidomethylation; Deamidation (NQ)	170590.89	Bifunctional glutamate/proline--tRNA ligase OS=Homo sapiens OX=9606 GN=EPRS1 PE=1 SV=5
259	TRUE	O95297|MPZL1_HUMAN	181.4245	9	16737.123	13148.817	7138.4854	4257.1523				185.59695	9	9	11	8	7				1		29082.18	Myelin protein zero-like protein 1 OS=Homo sapiens OX=9606 GN=MPZL1 PE=1 SV=1
193	TRUE	Q9UDY2|ZO2_HUMAN	204.83395	11	1950.8202	1219.2356				72.497925	1697.71	2802.7808	10	7	7				2	15	9	Oxidation (M); Acetylation (N-term); Deamidation (NQ)	133958.03	Tight junction protein ZO-2 OS=Homo sapiens OX=9606 GN=TJP2 PE=1 SV=2
675	TRUE	Q8TD16|BICD2_HUMAN	57.608696	2		4676.529							2	2	2							Deamidation (NQ)	93533.14	Protein bicaudal D homolog 2 OS=Homo sapiens OX=9606 GN=BICD2 PE=1 SV=1
45	TRUE	P00533|EGFR_HUMAN	342.97086	33	259363.03	287160.16	195186.42	163641.12	29319.875	47650.293	44111.28	37072.6	31	94	97	69	71	43	40	40	39	Oxidation (M); Deamidation (NQ); Carbamidomethylation	134277.39	Epidermal growth factor receptor OS=Homo sapiens OX=9606 GN=EGFR PE=1 SV=2
2	TRUE	Q09666|AHNK_HUMAN	482.97754	179	300475.4	261103	202954.05	203315.08	49063.723	73926.805	159002.42	187692.81	179	308	316	251	260	144	180	263	266	Deamidation (NQ); Oxidation (M); Carbamidomethylation	629101.25	Neuroblast differentiation-associated protein AHNAK OS=Homo sapiens OX=9606 GN=AHNAK PE=1 SV=2
461	TRUE	Q9H0B6|KLC2_HUMAN	127.82204	4	845.6382						397.60706	827.08295	4	2	1					5	2		68934.6	Kinesin light chain 2 OS=Homo sapiens OX=9606 GN=KLC2 PE=1 SV=1
221	TRUE	Q9NQS3|NECT3_HUMAN	229.52563	10	6637.66	9192.532	4801.09	4094.7454					10	13	14	10	10						61002.484	Nectin-3 OS=Homo sapiens OX=9606 GN=NECTIN3 PE=1 SV=1
344	TRUE	P53985|MOT1_HUMAN	225.26	7	31498.213	23828.48	20354.395	18665.375	1145.7783	3631.9165	3739.9895	7580.5415	7	20	23	15	18	4	8	9	7	Oxidation (M)	53944.145	Monocarboxylate transporter 1 OS=Homo sapiens OX=9606 GN=SLC16A1 PE=1 SV=3
54	TRUE	Q9UIW2|PLXA1_HUMAN	294.76688	33	25610.934	16870.518	6245.6055	4472.14					26	42	49	28	25		3	3	4	Oxidation (M); Deamidation (NQ); Carbamidomethylation	211067.05	Plexin-A1 OS=Homo sapiens OX=9606 GN=PLXNA1 PE=1 SV=3
75	TRUE	Q9Y6M7|S4A7_HUMAN	336.09598	23	38211.613	44247.066	70944.39	52713.582	327.0479	1788.5905	12000.219	17683.338	23	54	54	58	56	6	14	32	32	Oxidation (M); Deamidation (NQ); Carbamidomethylation	136044	Sodium bicarbonate cotransporter 3 OS=Homo sapiens OX=9606 GN=SLC4A7 PE=1 SV=2
683	TRUE	Q96RD7|PANX1_HUMAN	106.71258	2	418.6339	277.49713	496.00458	1404.5023			92.329025	452.45816	2	2	2	3	3	3	1	1	2		48050.113	Pannexin-1 OS=Homo sapiens OX=9606 GN=PANX1 PE=1 SV=4
666	TRUE	Q9P0V3|SH3B4_HUMAN	99.209236	2	209.24048		226.66212					386.20374	2	2	1	2		1		1	2		107495.78	SH3 domain-binding protein 4 OS=Homo sapiens OX=9606 GN=SH3BP4 PE=1 SV=1
138	TRUE	Q8WUM4|PDC6I_HUMAN	256.33084	15	3375.4727	3558.6968	255.5363	248.71652		160.00473	6650.1533	5667.608	15	9	12	1	3	1	2	16	14	Oxidation (M)	96023.164	Programmed cell death 6-interacting protein OS=Homo sapiens OX=9606 GN=PDCD6IP PE=1 SV=1
465	TRUE	P0DOX5|IGG1_HUMAN	137.17871	4	2905.7021	305.54773							4	3	2								49328.797	Immunoglobulin gamma-1 heavy chain OS=Homo sapiens OX=9606 PE=1 SV=2
165	TRUE	Q9NQC3|RTN4_HUMAN	248.83147	11	19018.346	15923.429	105133.51	82298.64	2021.1016	4184.045	9818.738	13434.269	11	8	13	30	21	3	3	8	11	Oxidation (M); Deamidation (NQ); Carbamidomethylation	129931.414	Reticulon-4 OS=Homo sapiens OX=9606 GN=RTN4 PE=1 SV=2
121	TRUE	P38606|VATA_HUMAN	284.9927	17	10604.824	9783.929	15711.126	8108.9614	1919.7045	5939.814	14019.7705	18816.574	17	21	23	18	18	10	19	25	24	Oxidation (M); Carbamidomethylation	68304.08	V-type proton ATPase catalytic subunit A OS=Homo sapiens OX=9606 GN=ATP6V1A PE=1 SV=2
603	TRUE	Q15517|CDSN_HUMAN	90.89801	2	2546.0588	3376.4827			345.55698	498.98392	329.3984		2	4	3	1		2	2	1	2	Oxidation (M)	51522.08	Corneodesmosin OS=Homo sapiens OX=9606 GN=CDSN PE=1 SV=3
115	TRUE	O60245|PCDH7_HUMAN	273.58752	18	12072.141	17646.121	20723.627	16459.21	6466.514	10124.83	7260.57	11723.252	18	17	25	22	21	12	18	14	15	Oxidation (M); Deamidation (NQ)	116070.93	Protocadherin-7 OS=Homo sapiens OX=9606 GN=PCDH7 PE=1 SV=2
544	TRUE	P09211|GSTP1_HUMAN	124.09101	3	1489.7423							2261.4795	3	2	1					1	3		23355.826	Glutathione S-transferase P OS=Homo sapiens OX=9606 GN=GSTP1 PE=1 SV=2
19	TRUE	P15924|DESP_HUMAN	367.2899	60	38090.727	14134.761	741.13257	510.35538	2441.364	803.3093	25457.336	1133.5115	60	67	19	4	4	7	9	62	4	Oxidation (M); Deamidation (NQ)	331773.88	Desmoplakin OS=Homo sapiens OX=9606 GN=DSP PE=1 SV=3
613	TRUE	Q6EMK4|VASN_HUMAN	78.94546	2			634.66486						2			2							71712.65	Vasorin OS=Homo sapiens OX=9606 GN=VASN PE=1 SV=1
657	TRUE	P06396|GELS_HUMAN	70.321724	2		312.6074					196.62381	219.58798	2		1					3	1		85697.516	Gelsolin OS=Homo sapiens OX=9606 GN=GSN PE=1 SV=1
475	TRUE	O75970|MPDZ_HUMAN	102.47922	4	595.7031	240.5586					1623.1594	367.89307	4	3	1		1	1		2	2	Deamidation (NQ); Oxidation (M)	221617.8	Multiple PDZ domain protein OS=Homo sapiens OX=9606 GN=MPDZ PE=1 SV=2
219	TRUE	P04439|HLAA_HUMAN	214.06154	8	7155.211	7896.3164	8683.02	6402.2935	1223.2534	2978.3413	2538.4165	550.8393	3	15	16	15	13	9	8	9	11	Acetylation (N-term); Deamidation (NQ); Carbamidomethylation; Oxidation (M)	40840.723	HLA class I histocompatibility antigen, A alpha chain OS=Homo sapiens OX=9606 GN=HLA-A PE=1 SV=2
378	TRUE	O00161|SNP23_HUMAN	161.17776	5	712.03125	1589.2346	2547.753	3109.9692			465.7059		5	1	2	8	9			1		Oxidation (M); Deamidation (NQ)	23354.041	Synaptosomal-associated protein 23 OS=Homo sapiens OX=9606 GN=SNAP23 PE=1 SV=1
518	TRUE	Q01628|IFM3_HUMAN	145.26028	2	6741.7617	5531.563	4422.701	6626.1006			178.5115	163.09384	2	5	7	5	10			1	2	Oxidation (M)	14632.091	Interferon-induced transmembrane protein 3 OS=Homo sapiens OX=9606 GN=IFITM3 PE=1 SV=2
189	TRUE	P52292|IMA1_HUMAN	263.3145	11	7513.4854	8800.755	4714.0938	7038.518	1905.5317	3747.1855	11665.66	13691.834	11	15	14	11	14	10	13	17	16	Deamidation (NQ); Carbamidomethylation	57861.914	Importin subunit alpha-1 OS=Homo sapiens OX=9606 GN=KPNA2 PE=1 SV=1
169	TRUE	Q01518|CAP1_HUMAN	218.30058	10							4366.698	3031.5552	10							14	13	Deamidation (NQ); Carbamidomethylation; Oxidation (M)	51901.457	Adenylyl cyclase-associated protein 1 OS=Homo sapiens OX=9606 GN=CAP1 PE=1 SV=5
543	TRUE	P05109|S10A8_HUMAN	116.889565	3	6079.404	1101.3542	638.7532	427.70026			276.13574	1498.5454	3	8	2	1	1			1	1	Carbamidomethylation	10834.506	Protein S100-A8 OS=Homo sapiens OX=9606 GN=S100A8 PE=1 SV=1
619	TRUE	O43688|PLPP2_HUMAN	89.63743	2	1555.3368	1941.9546	206.28264	870.90765			776.93414		2	3	2	2	1		1	1	1		32573.771	Phospholipid phosphatase 2 OS=Homo sapiens OX=9606 GN=PLPP2 PE=1 SV=1
126	TRUE	Q92974|ARHG2_HUMAN	282.5881	17	9559.148	9626.655	2059.0928	2519.592	1748.4255	5099.6323	6738.241	8191.038	16	19	22	10	11	13	22	20	18	Oxidation (M)	111542.55	Rho guanine nucleotide exchange factor 2 OS=Homo sapiens OX=9606 GN=ARHGEF2 PE=1 SV=4
88	TRUE	Q12907|LMAN2_HUMAN	258.42313	16	8303.137	4635.1567	67057.89	58329.703		100.40184	1422.5413	2240.6992	16	16	14	44	39		1	6	6	Deamidation (NQ); Oxidation (M); Carbamidomethylation	40228.664	Vesicular integral-membrane protein VIP36 OS=Homo sapiens OX=9606 GN=LMAN2 PE=1 SV=1
244	TRUE	Q8WVM8|SCFD1_HUMAN	202.24165	8			3452.9297	5559.972					8		1	10	9					Carbamidomethylation; Oxidation (M)	72379.84	Sec1 family domain-containing protein 1 OS=Homo sapiens OX=9606 GN=SCFD1 PE=1 SV=4
514	TRUE	P30530|UFO_HUMAN	111.27654	3	747.4623	195.85356						104.721176	2	3	3	2	1				1	Oxidation (M)	98336.71	Tyrosine-protein kinase receptor UFO OS=Homo sapiens OX=9606 GN=AXL PE=1 SV=4
486	TRUE	Q8IWB1|IPRI_HUMAN	116.41763	4	1942.3253	1634.1067	1746.625	1517.7898	332.33044	733.6187	1014.5089	2035.7795	4	3	6	5	3	4	2	4	3		62059.535	Inositol 1,4,5-trisphosphate receptor-interacting protein OS=Homo sapiens OX=9606 GN=ITPRIP PE=1 SV=1
425	TRUE	Q15084|PDIA6_HUMAN	179.81737	5	4951.3647	4724.3984	3757.4822	5747.9507	1019.8887	2621.0056	2340.9033	5421.8613	5	7	6	6	7	4	3	7	5		48121.32	Protein disulfide-isomerase A6 OS=Homo sapiens OX=9606 GN=PDIA6 PE=1 SV=1
156	TRUE	O75976|CBPD_HUMAN	210.80931	13			1224.2551	4936.643					13	3	1	10	13					Oxidation (M); Carbamidomethylation	152931.05	Carboxypeptidase D OS=Homo sapiens OX=9606 GN=CPD PE=1 SV=2
230	TRUE	Q93050|VPP1_HUMAN	203.26364	9	5333.248	2613.739	11298.606	8949.29			859.64624	1291.3586	8	5	7	10	14			1	2	Oxidation (M)	96412.72	V-type proton ATPase 116 kDa subunit a1 OS=Homo sapiens OX=9606 GN=ATP6V0A1 PE=1 SV=3
172	TRUE	P35580|MYH10_HUMAN	217.06459	13			102680.67	169609.72					8	1	1	7	20	1		1	5	Carbamidomethylation; Oxidation (M)	228999.11	Myosin-10 OS=Homo sapiens OX=9606 GN=MYH10 PE=1 SV=3
67	FALSE	A6NMY6|AXA2L_HUMAN	301.27728	19	49872.3	53238.07	73796.305	78281.08	12572.39	25151.709	66294.61	67581.02	19	24	34	26	40	18	19	37	32	Carbamidomethylation; Oxidation (M); Acetylation (N-term)	38659.008	Putative annexin A2-like protein OS=Homo sapiens OX=9606 GN=ANXA2P2 PE=5 SV=2
24	TRUE	Q14126|DSG2_HUMAN	370.7213	37	140527.36	139043.08	116245.234	105558.266	16618.723	26514.229	23035.053	32077.562	37	111	110	87	100	38	47	43	49	Deamidation (NQ); Oxidation (M); Carbamidomethylation	122293.92	Desmoglein-2 OS=Homo sapiens OX=9606 GN=DSG2 PE=1 SV=2
571	TRUE	Q8WU76|SCFD2_HUMAN	113.442825	3	1371.2083	1320.0889	1287.8871			488.11688	1117.7882	1913.0447	3	2	2	3	1	1	3	3	3		75127.14	Sec1 family domain-containing protein 2 OS=Homo sapiens OX=9606 GN=SCFD2 PE=1 SV=2
343	TRUE	Q9Y666|S12A7_HUMAN	141.76843	7	2095.3396	1005.89087	531.0222	733.3142		336.22687		951.82745	7	7	5	6	2		1		1		119105.836	Solute carrier family 12 member 7 OS=Homo sapiens OX=9606 GN=SLC12A7 PE=1 SV=3
322	TRUE	O75146|HIP1R_HUMAN	113.717285	5		205.67595						564.0299	4	4	2	2			1	2	3	Deamidation (NQ)	119388.31	Huntingtin-interacting protein 1-related protein OS=Homo sapiens OX=9606 GN=HIP1R PE=1 SV=2
447	TRUE	O75787|RENR_HUMAN	140.66139	4	1649.4816	1568.2133	5380.0957	4874.419	386.2917	495.2645	804.17535	1380.6166	4	2	1	5	6	1	1	2	1	Oxidation (M); Acetylation (N-term)	39008.004	Renin receptor OS=Homo sapiens OX=9606 GN=ATP6AP2 PE=1 SV=2
449	TRUE	P11234|RALB_HUMAN	117.578125	3	501.37332	523.04736	1947.7812	1752.4393	149.06696	133.38605	302.4417	323.5689	2	5	3	4	4	1	1	2	1	Oxidation (M)	23408.545	Ras-related protein Ral-B OS=Homo sapiens OX=9606 GN=RALB PE=1 SV=1
621	TRUE	O43759|SNG1_HUMAN	91.53795	2			1186.3777	623.1317					2			2	3						25455.602	Synaptogyrin-1 OS=Homo sapiens OX=9606 GN=SYNGR1 PE=1 SV=2
464	TRUE	Q13835|PKP1_HUMAN	116.37685	4									4	4						1		Oxidation (M)	82860.555	Plakophilin-1 OS=Homo sapiens OX=9606 GN=PKP1 PE=1 SV=2
288	TRUE	P61586|RHOA_HUMAN	158.48137	6			455.99677	469.60837					2	7	8	8	12	2	2	4	2	Oxidation (M); Carbamidomethylation; Deamidation (NQ)	21768.123	Transforming protein RhoA OS=Homo sapiens OX=9606 GN=RHOA PE=1 SV=1
377	TRUE	Q9Y5G2|PCDGE_HUMAN	158.50305	6	294.8937	338.9585		149.47859					2	4	5	9	5		1	3	2	Oxidation (M)	100875.2	Protocadherin gamma-B2 OS=Homo sapiens OX=9606 GN=PCDHGB2 PE=2 SV=1
255	TRUE	P15151|PVR_HUMAN	200.10878	7	46323.86	42967.547	25460.453	17092.326	530.92267	793.20044	618.83887		7	24	23	19	15	3	3	2	1	Oxidation (M)	45302.6	Poliovirus receptor OS=Homo sapiens OX=9606 GN=PVR PE=1 SV=2
298	TRUE	Q02413|DSG1_HUMAN	192.3041	8	7743.039	4271.119	191.91664	1651.2379	1266.8949	1559.7854	7469.957	4108.834	8	8	8	2	5	5	3	9	5	Oxidation (M)	113747.586	Desmoglein-1 OS=Homo sapiens OX=9606 GN=DSG1 PE=1 SV=2
77	TRUE	P04406|G3P_HUMAN	296.2367	15	38474.566	50365.574	10835.525	5371.5996	8954.584	8715.154	10449.473	23403.967	15	41	46	24	26	25	27	32	35	Deamidation (NQ); Oxidation (M); Carbamidomethylation	36053.207	Glyceraldehyde-3-phosphate dehydrogenase OS=Homo sapiens OX=9606 GN=GAPDH PE=1 SV=3
85	TRUE	P12235|ADT1_HUMAN	267.41876	19	21652.91	24111.527	25984.117	27836.758	17293.66	21184.299	24843.6	23996.535	6	36	40	38	49	37	40	38	39	Acetylation (N-term); Carbamidomethylation; Oxidation (M); Deamidation (NQ)	33064.492	ADP/ATP translocase 1 OS=Homo sapiens OX=9606 GN=SLC25A4 PE=1 SV=4
83	TRUE	P08581|MET_HUMAN	299.95395	21	27376.072	23782.426	18581.125	10565.768	1130.3579	3057.767	7377.6216	8195.262	21	30	44	29	24	7	15	23	24	Oxidation (M)	155541.3	Hepatocyte growth factor receptor OS=Homo sapiens OX=9606 GN=MET PE=1 SV=4
556	TRUE	P36404|ARL2_HUMAN	70.26963	2	1653.9897					456.42728	1361.5203	1621.5137	2	2	1				1	3	3	Oxidation (M)	20877.994	ADP-ribosylation factor-like protein 2 OS=Homo sapiens OX=9606 GN=ARL2 PE=1 SV=4
682	TRUE	Q9C004|SPY4_HUMAN	143.82521	2	2516.9766	2046.1736	1734.967	272.95728	340.04083	600.4735	1900.2681	802.1116	2	3	4	4	3	2	1	4	3		32541.375	Protein sprouty homolog 4 OS=Homo sapiens OX=9606 GN=SPRY4 PE=1 SV=2
446	TRUE	P36507|MP2K2_HUMAN	155.52736	5	1504.3752	1758.2937		567.7287		246.43036	586.1548	1138.7183	4	6	7	1	3		1	3	3	Oxidation (M)	44424.12	Dual specificity mitogen-activated protein kinase kinase 2 OS=Homo sapiens OX=9606 GN=MAP2K2 PE=1 SV=1
351	TRUE	P21964|COMT_HUMAN	154.41612	5	4531.467		1919.6272	6229.468	156084.36		2290.7285	942.5354	5	3	2	8	5	1	1	2	3	Oxidation (M); Carbamidomethylation	30037.049	Catechol O-methyltransferase OS=Homo sapiens OX=9606 GN=COMT PE=1 SV=2
69	TRUE	P05787|K2C8_HUMAN	276.7279	25	11782.061	8274.039	5745.312	20125.242		1841.0082	5258.4736	24291.496	15	68	29	25	37	17	26	74	37	Acetylation (N-term); Deamidation (NQ); Oxidation (M)	53704.242	Keratin, type II cytoskeletal 8 OS=Homo sapiens OX=9606 GN=KRT8 PE=1 SV=7
299	TRUE	Q9H4M9|EHD1_HUMAN	186.2614	8	1866.7101	1874.028	233.27563		132.62497		1112.1926	2329.087	8	6	6	3	3	2		6	6	Oxidation (M)	60626.86	EH domain-containing protein 1 OS=Homo sapiens OX=9606 GN=EHD1 PE=1 SV=2
356	TRUE	Q9H4L5|OSBL3_HUMAN	170.84282	6	271.2091	1458.303	255.18823			347.4432	297.65613	548.61536	6	4	7	2	2	1	5	3	4	Oxidation (M)	101223.625	Oxysterol-binding protein-related protein 3 OS=Homo sapiens OX=9606 GN=OSBPL3 PE=1 SV=1
105	TRUE	Q29RF7|PDS5A_HUMAN	270.34604	21	4954.871	5021.658	2597.032	2062.2615	583.5537	1523.1738	1868.0334	6817.777	21	11	12	10	12	8	9	12	21	Oxidation (M); Carbamidomethylation	150830.16	Sister chromatid cohesion protein PDS5 homolog A OS=Homo sapiens OX=9606 GN=PDS5A PE=1 SV=1
249	TRUE	Q96J84|KIRR1_HUMAN	172.54437	9	6268.544	3799.9326	3223.957	4290.952					9	10	10	6	6					Oxidation (M)	83535.77	Kin of IRRE-like protein 1 OS=Homo sapiens OX=9606 GN=KIRREL1 PE=1 SV=2
263	TRUE	P04040|CATA_HUMAN	177.21747	9	2100.8242	4520.481	3263.187	4610.173	293.39307	1351.3341	1751.2839	3572.9128	9	4	9	5	11	2	7	11	6	Acetylation (N-term); Oxidation (M)	59756.168	Catalase OS=Homo sapiens OX=9606 GN=CAT PE=1 SV=3
591	TRUE	Q96P63|SPB12_HUMAN	101.14977	3	441.531						1092.8549		3	1						2			46276.418	Serpin B12 OS=Homo sapiens OX=9606 GN=SERPINB12 PE=1 SV=1
203	TRUE	P78536|ADA17_HUMAN	185.47977	10	8560.157	7483.1313	8676.048	6785.085			182.41504		10	8	6	11	7	1	2	4		Deamidation (NQ); Oxidation (M)	93020.95	Disintegrin and metalloproteinase domain-containing protein 17 OS=Homo sapiens OX=9606 GN=ADAM17 PE=1 SV=1
125	TRUE	Q14008|CKAP5_HUMAN	229.81398	18	7913.5825	5587.9946	776.049			666.4356	3903.8438	7094.559	18	13	12	1		1	3	14	15	Oxidation (M)	225494.55	Cytoskeleton-associated protein 5 OS=Homo sapiens OX=9606 GN=CKAP5 PE=1 SV=3
476	TRUE	Q14114|LRP8_HUMAN	142.70775	4			326.27814	344.43643					3	4	1	3	2		1	1	1		105633.61	Low-density lipoprotein receptor-related protein 8 OS=Homo sapiens OX=9606 GN=LRP8 PE=1 SV=4
535	TRUE	Q6ZRP7|QSOX2_HUMAN	111.56024	3			336.40283	376.1381					3			2	1						77528.734	Sulfhydryl oxidase 2 OS=Homo sapiens OX=9606 GN=QSOX2 PE=1 SV=3
113	TRUE	P21796|VDAC1_HUMAN	303.39795	16	7408.4526	8714.004	116265.47	122299.1	4308.1924	5834.5435	7640.454	5934.439	16	2	3	65	65	2	2	8	4	Deamidation (NQ); Carbamidomethylation; Oxidation (M)	30772.59	Voltage-dependent anion-selective channel protein 1 OS=Homo sapiens OX=9606 GN=VDAC1 PE=1 SV=2
266	TRUE	Q9HBM0|VEZA_HUMAN	171.76701	9	2283.1196		1364.2605	968.4736	1196.6729	1707.8259	2030.7272	2541.455	9	4	8	2	1	4	7	6	6	Oxidation (M)	88664.57	Vezatin OS=Homo sapiens OX=9606 GN=VEZT PE=1 SV=3
260	TRUE	P11169|GTR3_HUMAN	185.46747	5	17121.297	16729.104	5449.2217	6376.742					5	18	12	6	12				1	Oxidation (M); Deamidation (NQ)	53924.266	Solute carrier family 2, facilitated glucose transporter member 3 OS=Homo sapiens OX=9606 GN=SLC2A3 PE=1 SV=1
557	TRUE	Q8NE01|CNNM3_HUMAN	103.49802	3									2		1	2	2			1			76119.195	Metal transporter CNNM3 OS=Homo sapiens OX=9606 GN=CNNM3 PE=1 SV=1
96	TRUE	P08648|ITA5_HUMAN	315.63077	20	88091.164	86866.29	53433.188	34693.582	1078.3877	4631.103	1896.3387	1616.7754	20	39	37	20	17	11	9	6	6	Deamidation (NQ); Oxidation (M)	114536.49	Integrin alpha-5 OS=Homo sapiens OX=9606 GN=ITGA5 PE=1 SV=2
355	TRUE	Q99714|HCD2_HUMAN	185.5007	5	680.12115	825.9707	950.45404	1222.0299	30.450819	410.83917	558.62024	896.5774	5	9	7	8	12	4	4	4	9	Carbamidomethylation; Oxidation (M)	26923.08	3-hydroxyacyl-CoA dehydrogenase type-2 OS=Homo sapiens OX=9606 GN=HSD17B10 PE=1 SV=3
284	TRUE	O43865|SAHH2_HUMAN	184.83742	8		2076.5408	11136.572	9951.551		276.22076		527.48883	8	1	6	11	14		1	1	2	Carbamidomethylation; Oxidation (M)	58951.42	S-adenosylhomocysteine hydrolase-like protein 1 OS=Homo sapiens OX=9606 GN=AHCYL1 PE=1 SV=2
380	TRUE	Q8N3R9|MPP5_HUMAN	143.31183	6	566.50305	276.71674	461.79742	257.451	156.96977	787.7128	321.16437	1507.6895	6	1	2	2	2	1	3	1	5	Oxidation (M)	77293.54	MAGUK p55 subfamily member 5 OS=Homo sapiens OX=9606 GN=MPP5 PE=1 SV=3
616	TRUE	O60291|MGRN1_HUMAN	102.28169	2	1009.095		524.05615	321.7531					2	2	2	2	1						60752.98	E3 ubiquitin-protein ligase MGRN1 OS=Homo sapiens OX=9606 GN=MGRN1 PE=1 SV=2
235	TRUE	P10321|HLAC_HUMAN	229.69603	10	1654.3256	3478.8945	3857.401	1194.2668	145.52257	763.61584	1247.1725	1128.2131	4	11	14	9	13	6	6	8	7		40648.53	HLA class I histocompatibility antigen, C alpha chain OS=Homo sapiens OX=9606 GN=HLA-C PE=1 SV=3
22	TRUE	P49368|TCPG_HUMAN	347.1447	35	328225.56	343838.25	185123.22	170700.42	73860.18	98699.46	124580.6	131643.17	35	116	133	73	77	54	61	86	73	Oxidation (M); Deamidation (NQ); Carbamidomethylation	60533.883	T-complex protein 1 subunit gamma OS=Homo sapiens OX=9606 GN=CCT3 PE=1 SV=4
636	TRUE	P43007|SATT_HUMAN	83.71071	2		178.98312	421.32635						2	1	2	1	1			1			55723.074	Neutral amino acid transporter A OS=Homo sapiens OX=9606 GN=SLC1A4 PE=1 SV=1
394	TRUE	P15531|NDKA_HUMAN	162.31918	5	1228.9626	3418.336	85.83592				4134.426	5308.4536	5	3	4	3	1			11	9	Oxidation (M); Carbamidomethylation	17148.72	Nucleoside diphosphate kinase A OS=Homo sapiens OX=9606 GN=NME1 PE=1 SV=1
605	TRUE	Q01831|XPC_HUMAN	67.10809	2	1238.6887						762.0947	635.02997	2	2						1	3		105952.69	DNA repair protein complementing XP-C cells OS=Homo sapiens OX=9606 GN=XPC PE=1 SV=4
554	TRUE	O15260|SURF4_HUMAN	108.47915	2	1029.3455	1289.6729	6901.438	3584				79.30685	2	2	6	6	4			1	6	Oxidation (M)	30393.996	Surfeit locus protein 4 OS=Homo sapiens OX=9606 GN=SURF4 PE=1 SV=3
338	TRUE	Q04917|1433F_HUMAN	129.3738	5	11577.298	5218.6504	2917.357	3514.3726	350.82336	1520.6881	7555.0747	11558.463	5	6	6	5	3	4	5	6	10	Oxidation (M); Deamidation (NQ)	28218.72	14-3-3 protein eta OS=Homo sapiens OX=9606 GN=YWHAH PE=1 SV=4
40	TRUE	P06756|ITAV_HUMAN	340.11832	34	262162.94	233098.98	159912.95	120961.96	10794.988	19248.232	16952.85	17778.523	34	111	111	88	88	22	32	25	31	Oxidation (M); Deamidation (NQ); Carbamidomethylation	116037.86	Integrin alpha-V OS=Homo sapiens OX=9606 GN=ITGAV PE=1 SV=2
589	TRUE	Q29980|MICB_HUMAN	68.8457	3			366.429						3		1	2						Deamidation (NQ)	42574.97	MHC class I polypeptide-related sequence B OS=Homo sapiens OX=9606 GN=MICB PE=1 SV=2
334	TRUE	Q06481|APLP2_HUMAN	151.73166	6	800.2418	970.027	1604.9243	2168.4792					4	2	6	9	9				1	Oxidation (M)	86955.77	Amyloid-like protein 2 OS=Homo sapiens OX=9606 GN=APLP2 PE=1 SV=2
615	TRUE	Q9BX95|SGPP1_HUMAN	73.298874	2	846.4656			2167.1587	466.61078	503.78992			2	2		1	2	1	2	1			49107.746	Sphingosine-1-phosphate phosphatase 1 OS=Homo sapiens OX=9606 GN=SGPP1 PE=1 SV=2
696	TRUE	O75330|HMMR_HUMAN	65.9071	2		286.8795						950.5104	2		2						2		84100.43	Hyaluronan mediated motility receptor OS=Homo sapiens OX=9606 GN=HMMR PE=1 SV=2
336	TRUE	Q9H307|PININ_HUMAN	173.89601	6	4191.676	4145.2036	1912.3026	4905.1533	1241.0162	2510.9753	3110.0784	4480.375	6	12	8	4	9	4	9	5	6	Oxidation (M)	81627.72	Pinin OS=Homo sapiens OX=9606 GN=PNN PE=1 SV=5
607	TRUE	Q9H3Z4|DNJC5_HUMAN	118.04001	2			828.75085	539.9278					2			1	4						22148.77	DnaJ homolog subfamily C member 5 OS=Homo sapiens OX=9606 GN=DNAJC5 PE=1 SV=1
31	TRUE	P63261|ACTG_HUMAN	380.06818	31	673495	670094.7	862496.3	968872.3	350799.84	439422.5	639177	814706.06	31	126	140	161	181	113	121	138	142	Carbamidomethylation; Oxidation (M); Deamidation (NQ)	41792.836	Actin, cytoplasmic 2 OS=Homo sapiens OX=9606 GN=ACTG1 PE=1 SV=1
328	FALSE	P01112|RASH_HUMAN	113.716385	4		268.48358	422.83258	1196.331					2	1	2	3	3	3	1	2		Oxidation (M)	21298.129	GTPase HRas OS=Homo sapiens OX=9606 GN=HRAS PE=1 SV=1
196	TRUE	Q14160|SCRIB_HUMAN	190.3485	12	3125.5767	2647.9124	2287.6602	2284.914	305.2301	742.8176	1971.6677	4194.864	12	13	12	10	5	1	4	3	10		174884.98	Protein scribble homolog OS=Homo sapiens OX=9606 GN=SCRIB PE=1 SV=4
211	TRUE	Q9Y624|JAM1_HUMAN	176.43884	10	11492.64	16513.906	4498.148	6025.551					10	14	15	9	10					Oxidation (M)	32583.13	Junctional adhesion molecule A OS=Homo sapiens OX=9606 GN=F11R PE=1 SV=1
51	TRUE	Q14573|ITPR3_HUMAN	300.26935	34	10418.157	9421.692	3344.213	4144.649	650.2324	4203.5186	6441.9653	12481.823	31	32	33	12	17	9	18	32	34	Oxidation (M); Deamidation (NQ); Carbamidomethylation	304106.47	Inositol 1,4,5-trisphosphate receptor type 3 OS=Homo sapiens OX=9606 GN=ITPR3 PE=1 SV=2
631	TRUE	Q9NYT0|PLEK2_HUMAN	119.70116	2	231.3912	555.5169	201.2299	282.13123			197.27518		2	1	2	1	1			3	1		39970.832	Pleckstrin-2 OS=Homo sapiens OX=9606 GN=PLEK2 PE=1 SV=1
320	TRUE	Q9P246|STIM2_HUMAN	132.2383	5	1234.9962	135.80984	407.5311				354.00806	1859.561	5	5	3	1	2		1	3	4	Oxidation (M)	83971.11	Stromal interaction molecule 2 OS=Homo sapiens OX=9606 GN=STIM2 PE=1 SV=2
38	TRUE	O15031|PLXB2_HUMAN	363.52594	38	81021.47	69311.195	55041.766	41244.816	1106.6173	2051.936	2190.3713	2414.3945	38	71	74	56	48	7	8	7	7	Oxidation (M); Deamidation (NQ); Carbamidomethylation	205127.2	Plexin-B2 OS=Homo sapiens OX=9606 GN=PLXNB2 PE=1 SV=3
141	TRUE	Q9NTJ5|SAC1_HUMAN	234.41356	15	265.43243	399.2342	11509.348	8780.28					15	3	2	23	20	1	1		1	Oxidation (M); Carbamidomethylation	66966.89	Phosphatidylinositol-3-phosphatase SAC1 OS=Homo sapiens OX=9606 GN=SACM1L PE=1 SV=2
58	FALSE	P55283|CADH4_HUMAN	107.37604	2	11132.135	9612.332	7667.1724	8084.9966	1401.817	2611.6357	3270.9846	956.1208	2	3	5	3	3	3	3	3	2		100280.57	Cadherin-4 OS=Homo sapiens OX=9606 GN=CDH4 PE=2 SV=2
101	TRUE	P53618|COPB_HUMAN	276.33405	18	130287.38	12421.451	6054.4634	4749.0312	2934.506	4873.553	13518.404	123980.92	18	21	26	16	9	13	14	21	26	Oxidation (M)	107142.22	Coatomer subunit beta OS=Homo sapiens OX=9606 GN=COPB1 PE=1 SV=3
504	TRUE	P04083|ANXA1_HUMAN	137.92961	4	1412.1721	443.19684	618.69727					1200.5109	4	4	1	2	1			3	2		38714.242	Annexin A1 OS=Homo sapiens OX=9606 GN=ANXA1 PE=1 SV=2
716	TRUE	P48509|CD151_HUMAN	100.859085	2	812.7291	532.9178	2279.2935	1013.4248					2	4	2	3	4			1			28295.102	CD151 antigen OS=Homo sapiens OX=9606 GN=CD151 PE=1 SV=3
364	TRUE	P21283|VATC1_HUMAN	166.49005	5	170.85971	286.77383	1611.5818	302.3592			216.04442		5	2	1	4	2	1		2	2	Oxidation (M)	43941.605	V-type proton ATPase subunit C 1 OS=Homo sapiens OX=9606 GN=ATP6V1C1 PE=1 SV=4
421	TRUE	O00429|DNM1L_HUMAN	165.01122	5		115.75295					409.23907		5		1					4	2	Oxidation (M)	81877.15	Dynamin-1-like protein OS=Homo sapiens OX=9606 GN=DNM1L PE=1 SV=2
168	TRUE	Q8NFD5|ARI1B_HUMAN	232.94235	13	5708.7573	5015.723	2349.8088	1888.873	558.0186	1909.1906	4054.5298	7363.01	13	18	17	3	5	9	9	11	17	Oxidation (M)	236123.39	AT-rich interactive domain-containing protein 1B OS=Homo sapiens OX=9606 GN=ARID1B PE=1 SV=2
52	FALSE	Q58FF8|H90B2_HUMAN	193.62904	8	1924.7231	2567.0293				113.778015	3273.1873	1960.1702	2	14	18	12	10	14	11	22	21	Oxidation (M)	44348.92	Putative heat shock protein HSP 90-beta 2 OS=Homo sapiens OX=9606 GN=HSP90AB2P PE=1 SV=2
50	TRUE	P16615|AT2A2_HUMAN	348.85742	30	57577.21	59325.223	152756.42	111445.49	16784.531	27211.238	33809.97	53220.645	30	55	52	90	72	27	42	46	47	Oxidation (M); Carbamidomethylation; Deamidation (NQ); Acetylation (N-term)	114756.86	Sarcoplasmic/endoplasmic reticulum calcium ATPase 2 OS=Homo sapiens OX=9606 GN=ATP2A2 PE=1 SV=1
575	TRUE	P51795|CLCN5_HUMAN	87.36586	3		1112.7898		1103.3336					3	1	4	1	2					Oxidation (M)	90785.19	H(+)/Cl(-) exchange transporter 5 OS=Homo sapiens OX=9606 GN=CLCN5 PE=1 SV=2
13	TRUE	Q14980|NUMA1_HUMAN	414.15375	72	48502.176	35804.72	8697.539	16280.926	10930.342	18367.002	22196.531	52022.555	72	91	97	27	54	58	70	62	77	Oxidation (M); Acetylation (N-term); Deamidation (NQ); Carbamidomethylation	238259.5	Nuclear mitotic apparatus protein 1 OS=Homo sapiens OX=9606 GN=NUMA1 PE=1 SV=2
53	FALSE	P18564|ITB6_HUMAN	77.91522	2	80960.13	82138.17	49094.96	51307.25	8393.585	11470.603	10918.222	8611.118	2	8	9	4	4	3	3	2	3		85935.984	Integrin beta-6 OS=Homo sapiens OX=9606 GN=ITGB6 PE=1 SV=2
430	TRUE	Q8IUD2|RB6I2_HUMAN	130.99426	5	1278.3739	337.55988		184.69418			828.6658	1734.3414	5	4	4	1	2			6	5	Oxidation (M)	128086.39	ELKS/Rab6-interacting/CAST family member 1 OS=Homo sapiens OX=9606 GN=ERC1 PE=1 SV=1
418	TRUE	O95235|KI20A_HUMAN	153.1865	5	896.23486	9193.546			8332.931	7791.867	7556.959	1141.3827	5	3	8	1		3	6	5	4	Deamidation (NQ)	100277.96	Kinesin-like protein KIF20A OS=Homo sapiens OX=9606 GN=KIF20A PE=1 SV=1
142	TRUE	Q32MZ4|LRRF1_HUMAN	234.35258	14	2841.0505	3497.1538	584.86285	236.29742	182.01598	946.9972	6266.2646	9156.093	14	11	8	2	5	2	6	18	20	Oxidation (M)	89253.02	Leucine-rich repeat flightless-interacting protein 1 OS=Homo sapiens OX=9606 GN=LRRFIP1 PE=1 SV=2
102	TRUE	Q9UIQ6|LCAP_HUMAN	294.50714	18	27589.354	25500.494	18946.77	13845.945	387.65344	1806.531	4451.4087	4445.619	18	35	39	23	27	3	10	9	16	Oxidation (M); Deamidation (NQ); Carbamidomethylation	117349.1	Leucyl-cystinyl aminopeptidase OS=Homo sapiens OX=9606 GN=LNPEP PE=1 SV=3
110	TRUE	P42892|ECE1_HUMAN	241.1841	15	11386.771	8348.055	20090.074	11605.144			377.1549		15	14	17	25	16			3	3	Deamidation (NQ); Oxidation (M)	87163.67	Endothelin-converting enzyme 1 OS=Homo sapiens OX=9606 GN=ECE1 PE=1 SV=2
370	TRUE	P05106|ITB3_HUMAN	188.80942	6	5310.3853	4087.1992	1865.2891	1341.3054					6	7	9	4	10						87057.81	Integrin beta-3 OS=Homo sapiens OX=9606 GN=ITGB3 PE=1 SV=2
306	TRUE	P23528|COF1_HUMAN	223.5285	8	12497.375	11146.3	8456.529	9320.867	4323.409	5856.44	13350.141	16673.412	8	5	8	13	5	5	8	10	9	Acetylation (N-term); Carbamidomethylation	18502.488	Cofilin-1 OS=Homo sapiens OX=9606 GN=CFL1 PE=1 SV=3
59	TRUE	Q9H5V8|CDCP1_HUMAN	304.2124	30	149027.2	156084.3	65199.594	55210.58	9913.604	11177.895	19904.502	20176.855	30	71	78	40	35	11	16	15	18	Oxidation (M); Carbamidomethylation; Deamidation (NQ)	92931.73	CUB domain-containing protein 1 OS=Homo sapiens OX=9606 GN=CDCP1 PE=1 SV=3
92	TRUE	O00571|DDX3X_HUMAN	279.49118	20	33485.69	30021.129	17565.379	16024.76	1788.8834	7084.5107	33433.668	42882.64	20	27	34	13	14	9	12	33	29	Oxidation (M); Acetylation (N-term)	73243.414	ATP-dependent RNA helicase DDX3X OS=Homo sapiens OX=9606 GN=DDX3X PE=1 SV=3
311	TRUE	P61224|RAP1B_HUMAN	158.39308	7									2	3	3	9	7	3	2	3	1	Carbamidomethylation; Oxidation (M)	20824.783	Ras-related protein Rap-1b OS=Homo sapiens OX=9606 GN=RAP1B PE=1 SV=1
174	TRUE	P63244|RACK1_HUMAN	212.3924	11	39324.59	21502.693	15205.237	15352.941	16518.934	18983.334	21192.838	22297.129	11	26	23	9	15	17	14	16	19	Carbamidomethylation; Deamidation (NQ); Oxidation (M)	35076.723	Receptor of activated protein C kinase 1 OS=Homo sapiens OX=9606 GN=RACK1 PE=1 SV=3
400	TRUE	Q14C86|GAPD1_HUMAN	155.93382	5	572.6216	558.13354						410.09717	5	2	2					6	3	Oxidation (M)	164979.86	GTPase-activating protein and VPS9 domain-containing protein 1 OS=Homo sapiens OX=9606 GN=GAPVD1 PE=1 SV=2
64	TRUE	Q9UJS0|CMC2_HUMAN	340.93182	26	33261.992	27477.014	96013.27	104211.57	9133.209	10966.123	23141.646	30590.059	26	33	34	59	60	15	21	27	30	Oxidation (M); Deamidation (NQ)	74175.58	Calcium-binding mitochondrial carrier protein Aralar2 OS=Homo sapiens OX=9606 GN=SLC25A13 PE=1 SV=2
512	TRUE	Q6UXD5|SE6L2_HUMAN	108.87739	3	841.5976	1417.7241							3	2	4	1	1					Oxidation (M)	97560.07	Seizure 6-like protein 2 OS=Homo sapiens OX=9606 GN=SEZ6L2 PE=1 SV=2
79	TRUE	P0DMV8|HS71A_HUMAN	279.48413	22	4471.3203	6222.774	3224.942	3599.3157	2179.587	2704.6414	6927.7676	4444.4614	6	23	25	17	17	14	18	26	25	Oxidation (M); Deamidation (NQ)	70052.23	Heat shock 70 kDa protein 1A OS=Homo sapiens OX=9606 GN=HSPA1A PE=1 SV=1
354	TRUE	P11233|RALA_HUMAN	152.8619	4			1673.4487	1613.148					3	1		11	9					Oxidation (M); Deamidation (NQ)	23566.79	Ras-related protein Ral-A OS=Homo sapiens OX=9606 GN=RALA PE=1 SV=1
670	TRUE	O60645|EXOC3_HUMAN	87.85193	2		249.5376							2		1					1			85567.42	Exocyst complex component 3 OS=Homo sapiens OX=9606 GN=EXOC3 PE=1 SV=3
148	TRUE	P51148|RAB5C_HUMAN	219.71992	9	16860.473	13899.768	47879.26	46564.527	2646.4722	5186.401	8536.495	12482.884	6	14	12	30	29	11	17	9	13	Oxidation (M); Deamidation (NQ)	23482.553	Ras-related protein Rab-5C OS=Homo sapiens OX=9606 GN=RAB5C PE=1 SV=2
328	TRUE	P01111|RASN_HUMAN	151.61555	7	854.33386	888.9134	1743.05	2430.9001	244.15236	189.52261	535.3834		4	5	6	5	7	4	4	6	1	Oxidation (M); Deamidation (NQ); Carbamidomethylation	21229.162	GTPase NRas OS=Homo sapiens OX=9606 GN=NRAS PE=1 SV=1
456	TRUE	O95197|RTN3_HUMAN	144.72174	4	19749.371	18769.422	23815.918	24303.71	6083.547	11281.846	15413.806	19539.55	4	8	8	11	12	8	12	8	11		112611.05	Reticulon-3 OS=Homo sapiens OX=9606 GN=RTN3 PE=1 SV=2
48	TRUE	P26006|ITA3_HUMAN	355.8271	25	380294.03	331881.8	172287.31	141876.23	8877.086	13843.688	15756.004	14822.028	25	131	123	91	83	26	25	33	22	Oxidation (M); Deamidation (NQ)	116612.234	Integrin alpha-3 OS=Homo sapiens OX=9606 GN=ITGA3 PE=1 SV=5
161	TRUE	P06213|INSR_HUMAN	226.54668	14	3531.8657	5578.192	1337.1124	652.42834				166.63095	11	10	18	8	3				2	Oxidation (M); Carbamidomethylation	156332.86	Insulin receptor OS=Homo sapiens OX=9606 GN=INSR PE=1 SV=4
415	TRUE	Q15165|PON2_HUMAN	154.6764	4			1094.1716	1561.0165			154.90471	280.99512	4		2	3	4			2	1	Deamidation (NQ)	39380.918	Serum paraoxonase/arylesterase 2 OS=Homo sapiens OX=9606 GN=PON2 PE=1 SV=4
11	TRUE	P35908|K22E_HUMAN	431.88446	61	468245.53	267899.75	45180.05	117957.66	95455.68	195792.69	418629.5	481365.75	45	170	127	50	94	99	123	191	177	Deamidation (NQ); Oxidation (M); Acetylation (N-term); Carbamidomethylation	65432.883	Keratin, type II cytoskeletal 2 epidermal OS=Homo sapiens OX=9606 GN=KRT2 PE=1 SV=2
422	TRUE	P07947|YES_HUMAN	129.01671	5	2797.932	1532.0798	763.7279	1159.0266	213.85309	595.51825	830.9654	472.55978	5	3	2	2	1	2	3	1	3		60801.23	Tyrosine-protein kinase Yes OS=Homo sapiens OX=9606 GN=YES1 PE=1 SV=3
25	FALSE	P50993|AT1A2_HUMAN	272.13666	14	31398.078	21944.37	49723.535	256142.38	9960.59	11951.237	173076.45	13418.941	6	31	30	39	38	11	8	14	17	Carbamidomethylation; Deamidation (NQ); Oxidation (M)	112265.44	Sodium/potassium-transporting ATPase subunit alpha-2 OS=Homo sapiens OX=9606 GN=ATP1A2 PE=1 SV=1
517	TRUE	Q9NV70|EXOC1_HUMAN	87.53695	3	1565.7747	1197.4309	204.58238	162.93115		242.00569	600.7773		3	2	3	1	2		1	1	1	Oxidation (M)	101981.53	Exocyst complex component 1 OS=Homo sapiens OX=9606 GN=EXOC1 PE=1 SV=4
451	TRUE	Q9UNK0|STX8_HUMAN	152.92763	4			2642.3862	1490.7786					4			4	6						26906.693	Syntaxin-8 OS=Homo sapiens OX=9606 GN=STX8 PE=1 SV=2
678	TRUE	Q92896|GSLG1_HUMAN	74.87726	2									2		2							Oxidation (M)	134551.84	Golgi apparatus protein 1 OS=Homo sapiens OX=9606 GN=GLG1 PE=1 SV=2
242	TRUE	Q9NZW5|MPP6_HUMAN	195.47928	9	898.156	819.5357	2884.4785	2688.9521					9	3	3	9	6					Oxidation (M)	61117.004	MAGUK p55 subfamily member 6 OS=Homo sapiens OX=9606 GN=MPP6 PE=1 SV=2
385	TRUE	Q9NXE4|NSMA3_HUMAN	162.05702	6	603.5345	2083.0122	744.63666	567.2971			563.6581	1395.1008	6	2	8	2	2		1	1	5	Acetylation (N-term); Oxidation (M)	97809.92	Sphingomyelin phosphodiesterase 4 OS=Homo sapiens OX=9606 GN=SMPD4 PE=1 SV=3
234	TRUE	Q9BQ39|DDX50_HUMAN	196.18202	9	4472.74	5068.4297	5592.8486	9745.072	3183.5947	5278.1025	4518.031	12006.531	9	12	7	9	12	5	6	7	7	Deamidation (NQ)	82565.016	ATP-dependent RNA helicase DDX50 OS=Homo sapiens OX=9606 GN=DDX50 PE=1 SV=1
108	TRUE	Q07157|ZO1_HUMAN	255.31285	19	2693.7795	1149.7018		244.51277		143.53903	2776.3418	5301.123	18	9	8		1		2	14	20	Acetylation (N-term); Deamidation (NQ); Oxidation (M)	195459.03	Tight junction protein ZO-1 OS=Homo sapiens OX=9606 GN=TJP1 PE=1 SV=3
698	TRUE	Q9P273|TEN3_HUMAN	60.505028	2		419.08044	271.35095						2	1	2	1							300950.47	Teneurin-3 OS=Homo sapiens OX=9606 GN=TENM3 PE=1 SV=3
635	TRUE	Q8NF50|DOCK8_HUMAN	102.67942	2	1728.9093	1620.2449	1052.9058	780.4728	665.9524	1502.4307	1636.3076	1956.3964	2	1	1	3	1	1	3	1	1		238529.06	Dedicator of cytokinesis protein 8 OS=Homo sapiens OX=9606 GN=DOCK8 PE=1 SV=3
132	TRUE	Q12913|PTPRJ_HUMAN	275.39325	17	9632.438	6870.845	1873.922	3968.775					17	17	18	9	11				1	Oxidation (M)	145941.48	Receptor-type tyrosine-protein phosphatase eta OS=Homo sapiens OX=9606 GN=PTPRJ PE=1 SV=3
272	TRUE	Q16625|OCLN_HUMAN	211.44812	9	12645.1	13836.38	6087.6885	8657.758	1006.08795	2930.5337	2400.4019	3312.2551	9	13	14	9	17	3	7	5	5	Oxidation (M)	59143.785	Occludin OS=Homo sapiens OX=9606 GN=OCLN PE=1 SV=1
264	TRUE	O60488|ACSL4_HUMAN	203.27525	8	1007.8046	664.52014	3369.689	3752.6387			407.2168	644.48956	6	8	8	14	13	1	1	5	7	Oxidation (M); Deamidation (NQ)	79188.04	Long-chain-fatty-acid--CoA ligase 4 OS=Homo sapiens OX=9606 GN=ACSL4 PE=1 SV=2
310	TRUE	O95716|RAB3D_HUMAN	185.33212	6	587.9737	406.91617	2151.2837	1911.9424				723.4317	3	7	10	12	16	5	6	7	11	Oxidation (M); Deamidation (NQ)	24267.14	Ras-related protein Rab-3D OS=Homo sapiens OX=9606 GN=RAB3D PE=1 SV=1
35	TRUE	P11021|BIP_HUMAN	359.8433	35	109928.98	98702.305	130933.65	129188.1	57964.227	88023.38	97518.55	117939.32	31	74	84	89	93	70	85	86	84	Deamidation (NQ); Oxidation (M)	72332.95	Endoplasmic reticulum chaperone BiP OS=Homo sapiens OX=9606 GN=HSPA5 PE=1 SV=2
689	TRUE	P14384|CBPM_HUMAN	76.459625	2	527.39874		315.8975						2	2	1	1							50513.848	Carboxypeptidase M OS=Homo sapiens OX=9606 GN=CPM PE=1 SV=2
248	TRUE	P18206|VINC_HUMAN	167.63466	9							1189.604	1166.7078	9							7	7		123799.3	Vinculin OS=Homo sapiens OX=9606 GN=VCL PE=1 SV=4
6	TRUE	P04264|K2C1_HUMAN	425.36325	73	1812348.4	639394.5	339608.06	568018.5	576407.6	589634.06	1924754.2	866913.2	59	327	139	100	145	156	171	336	189	Deamidation (NQ); Oxidation (M); Carbamidomethylation; Acetylation (N-term)	66038.73	Keratin, type II cytoskeletal 1 OS=Homo sapiens OX=9606 GN=KRT1 PE=1 SV=6
109	TRUE	O15294|OGT1_HUMAN	230.44293	18	8481.8545	8958.31	226.57329	297.2987		2040.7821	3444.8547	4881.818	18	25	20	2	3	2	7	7	15	Deamidation (NQ); Oxidation (M)	116924.6	UDP-N-acetylglucosamine--peptide N-acetylglucosaminyltransferase 110 kDa subunit OS=Homo sapiens OX=9606 GN=OGT PE=1 SV=3
673	TRUE	Q9NRZ7|PLCC_HUMAN	75.64202	2			731.44775	709.8345					2			2	3						43380.965	1-acyl-sn-glycerol-3-phosphate acyltransferase gamma OS=Homo sapiens OX=9606 GN=AGPAT3 PE=1 SV=1
715	TRUE	Q9BSR8|YIPF4_HUMAN	74.110794	2			1243.6165	2533.4487					2			1	4						27082.666	Protein YIPF4 OS=Homo sapiens OX=9606 GN=YIPF4 PE=1 SV=1
49	FALSE	P35609|ACTN2_HUMAN	188.5531	7	6589.857	8870.6455	2439.8428	3424.1848	991.329	1327.7693	23593.861	29109.742	7	8	11	3	7	1	2	14	15	Carbamidomethylation; Oxidation (M)	103853.78	Alpha-actinin-2 OS=Homo sapiens OX=9606 GN=ACTN2 PE=1 SV=1
623	TRUE	O00400|ACATN_HUMAN	104.72722	2			1080.2208	1112.6296					2			4	2						60908.992	Acetyl-coenzyme A transporter 1 OS=Homo sapiens OX=9606 GN=SLC33A1 PE=1 SV=1
10	TRUE	Q01082|SPTB2_HUMAN	403.844	72	22496.344	17707.383	24712.389	22968.682	128.74368	156.46564	46689.203	29364.707	67	73	68	63	68	3	6	63	80	Oxidation (M); Carbamidomethylation; Deamidation (NQ)	274609.22	Spectrin beta chain, non-erythrocytic 1 OS=Homo sapiens OX=9606 GN=SPTBN1 PE=1 SV=2
411	TRUE	Q96CW1|AP2M1_HUMAN	117.08809	5		678.50494	1252.0286	3835.5813			287.64255		5		1	1	8			2			49654.676	AP-2 complex subunit mu OS=Homo sapiens OX=9606 GN=AP2M1 PE=1 SV=2
90	TRUE	P50281|MMP14_HUMAN	289.1667	17	82165.88	78362.805	38471.42	44959.49	22703.463	34087.023	30617.957	33936.457	17	32	40	33	32	26	30	33	29	Oxidation (M); Deamidation (NQ); Carbamidomethylation	65893.92	Matrix metalloproteinase-14 OS=Homo sapiens OX=9606 GN=MMP14 PE=1 SV=3
443	TRUE	Q04721|NOTC2_HUMAN	163.85915	5	1471.7148	1622.1295	430.70245	858.0933	484.75275	720.1775	641.44	1010.2063	5	4	4	1	3	3	2	4	2	Oxidation (M)	265404.78	Neurogenic locus notch homolog protein 2 OS=Homo sapiens OX=9606 GN=NOTCH2 PE=1 SV=3
640	TRUE	Q96EY1|DNJA3_HUMAN	100.059555	2	165.28981		1054.1783					314.17545	2	2		2					1		52488.68	DnaJ homolog subfamily A member 3, mitochondrial OS=Homo sapiens OX=9606 GN=DNAJA3 PE=1 SV=2
639	TRUE	Q96NW4|ANR27_HUMAN	92.37038	2	190.64743							166.92586	2	2	1						2		116984.04	Ankyrin repeat domain-containing protein 27 OS=Homo sapiens OX=9606 GN=ANKRD27 PE=1 SV=2
434	FALSE	Q9H201|EPN3_HUMAN	92.983765	2	532.81696	247.89752	1428.7113	1763.6384			166.42316	313.53137	2	1	1	2	2		1	1	1		68222.23	Epsin-3 OS=Homo sapiens OX=9606 GN=EPN3 PE=2 SV=1
536	TRUE	P51636|CAV2_HUMAN	121.555664	3	6503.2744	6130.7227	7775.4526	6669.9404	691.10425	3327.7861	4707.143	6335.7466	3	3	4	1	3	1	2	4	4		18291.182	Caveolin-2 OS=Homo sapiens OX=9606 GN=CAV2 PE=1 SV=2
49	TRUE	P12814|ACTN1_HUMAN	347.53525	34	43228.9	42077.453	14000.588	15699.852	4392.1646	11348.661	111018.39	134557.47	34	32	35	15	22	8	22	67	74	Carbamidomethylation; Oxidation (M)	103057.55	Alpha-actinin-1 OS=Homo sapiens OX=9606 GN=ACTN1 PE=1 SV=2
427	TRUE	Q9C0C4|SEM4C_HUMAN	133.48453	5	211.05807	1681.2468	524.54407	963.4547			346.51883	429.8798	5	5	3	3	5			2	2		92622.93	Semaphorin-4C OS=Homo sapiens OX=9606 GN=SEMA4C PE=1 SV=2
445	TRUE	Q13492|PICAL_HUMAN	168.0493	5	242.12595	289.5541	544.2075	1119.4304			95.45359	683.8262	5	1	2	6	4			2	3	Oxidation (M)	70754.51	Phosphatidylinositol-binding clathrin assembly protein OS=Homo sapiens OX=9606 GN=PICALM PE=1 SV=2
237	TRUE	P30153|2AAA_HUMAN	207.62338	9	1538.0809	1229.032	1017.57666	696.0405		192.461	2157.5266	4751.003	9	10	8	5	4	1	3	11	13	Oxidation (M); Deamidation (NQ)	65308.582	Serine/threonine-protein phosphatase 2A 65 kDa regulatory subunit A alpha isoform OS=Homo sapiens OX=9606 GN=PPP2R1A PE=1 SV=4
181	TRUE	P61204|ARF3_HUMAN	209.84123	8	15955.77	13261.938	12551.297	7642.8857	8454.424	12803.445	10331.204	11332.87	5	15	16	14	11	15	19	18	15	Oxidation (M)	20600.76	ADP-ribosylation factor 3 OS=Homo sapiens OX=9606 GN=ARF3 PE=1 SV=2
663	TRUE	Q99755|PI51A_HUMAN	58.5997	2									2		1				1	1			62633.32	Phosphatidylinositol 4-phosphate 5-kinase type-1 alpha OS=Homo sapiens OX=9606 GN=PIP5K1A PE=1 SV=1
294	TRUE	P54760|EPHB4_HUMAN	180.36362	8	2836.4502	1430.6105	1030.5411						7	10	11	6	5	1	1	1	2	Carbamidomethylation; Oxidation (M)	108270.19	Ephrin type-B receptor 4 OS=Homo sapiens OX=9606 GN=EPHB4 PE=1 SV=2
99	TRUE	P51149|RAB7A_HUMAN	263.39304	14	46514.54	51203.504	198879.03	192330.06	9793.621	11161.93	30121.352	28992.037	14	23	30	49	49	12	14	17	19	Deamidation (NQ); Oxidation (M); Carbamidomethylation	23489.742	Ras-related protein Rab-7a OS=Homo sapiens OX=9606 GN=RAB7A PE=1 SV=1
644	TRUE	P30989|NTR1_HUMAN	120.72313	2	6420.0503	7233.6504	3917.104	3450.741	858.1252	1922.06	1611.3977	2089.6187	2	3	2	3	1	1	1	2	2	Carbamidomethylation; Oxidation (M)	46258.754	Neurotensin receptor type 1 OS=Homo sapiens OX=9606 GN=NTSR1 PE=1 SV=2
73	TRUE	Q9NZB2|F120A_HUMAN	308.8112	21	10380.627	13683.846	4075.115	4912.341	2357.9402	3875.0205	4095.598	12845.434	21	30	28	16	17	15	19	25	23	Deamidation (NQ); Oxidation (M); Carbamidomethylation	121887.69	Constitutive coactivator of PPAR-gamma-like protein 1 OS=Homo sapiens OX=9606 GN=FAM120A PE=1 SV=2
269	TRUE	Q12959|DLG1_HUMAN	212.70203	9	980.85	1429.7944	13028.22	1278.874			1391.656	12561.045	9	5	6	6	8		1	9	7	Carbamidomethylation	100455.016	Disks large homolog 1 OS=Homo sapiens OX=9606 GN=DLG1 PE=1 SV=2
44	TRUE	P16070|CD44_HUMAN	338.32452	26	1417918.6	1191547	1088065.4	917544.44	138935.4	194753.28	154739.11	202714.34	26	156	142	140	138	41	49	47	53	Carbamidomethylation; Oxidation (M); Deamidation (NQ); Acetylation (N-term)	81537.62	CD44 antigen OS=Homo sapiens OX=9606 GN=CD44 PE=1 SV=3
232	TRUE	Q14517|FAT1_HUMAN	183.227	9								292.49658	9	4		4	3		5	1	10	Oxidation (M)	506272.75	Protocadherin Fat 1 OS=Homo sapiens OX=9606 GN=FAT1 PE=1 SV=2
652	TRUE	O75326|SEM7A_HUMAN	70.78114	2									2	1	2								74823.766	Semaphorin-7A OS=Homo sapiens OX=9606 GN=SEMA7A PE=1 SV=1
215	TRUE	Q86X29|LSR_HUMAN	184.08957	9	7834.509	4671.502	3454.4697	3364.9775			306.9516	504.59204	9	11	9	6	7			1	3	Oxidation (M)	71438.875	Lipolysis-stimulated lipoprotein receptor OS=Homo sapiens OX=9606 GN=LSR PE=1 SV=4
58	TRUE	P19022|CADH2_HUMAN	353.2783	26	136825.78	135417.95	149924.7	119941.01	19949.98	31146.111	35261.668	45467.81	26	80	87	77	69	36	35	36	42	Deamidation (NQ); Oxidation (M)	99809.33	Cadherin-2 OS=Homo sapiens OX=9606 GN=CDH2 PE=1 SV=4
495	TRUE	Q96SB3|NEB2_HUMAN	155.22108	4	748.69507	453.86908					461.95966	1758.2815	4	6	4				1	4	5		89334.22	Neurabin-2 OS=Homo sapiens OX=9606 GN=PPP1R9B PE=1 SV=3
563	TRUE	Q13277|STX3_HUMAN	85.0976	3									3			2	2						33155.027	Syntaxin-3 OS=Homo sapiens OX=9606 GN=STX3 PE=1 SV=3
519	TRUE	Q7L5N7|PCAT2_HUMAN	113.50276	3	740.37476	583.6467				81.1875	416.7541	1009.25366	3	4	1	1	2		1	1	4		60207.863	Lysophosphatidylcholine acyltransferase 2 OS=Homo sapiens OX=9606 GN=LPCAT2 PE=1 SV=1
61	TRUE	P21589|5NTD_HUMAN	368.206	25	143645.1	121438.09	50308.8	39186.45		143.93755			25	92	87	52	52		1	1	1	Oxidation (M); Deamidation (NQ)	63367.742	5'-nucleotidase OS=Homo sapiens OX=9606 GN=NT5E PE=1 SV=1
317	TRUE	Q96GC9|VMP1_HUMAN	149.88744	4	87.97893	463.2024	3468.1223	2312.294		92.79253		332.81714	4	7	8	15	16	1	2	2	4	Deamidation (NQ)	46237.67	Vacuole membrane protein 1 OS=Homo sapiens OX=9606 GN=VMP1 PE=1 SV=1
687	TRUE	Q12846|STX4_HUMAN	61.78482	2			135.49629	2041.8967					2			1	3						34179.93	Syntaxin-4 OS=Homo sapiens OX=9606 GN=STX4 PE=1 SV=2
231	TRUE	Q9BR76|COR1B_HUMAN	201.54457	8	3284.5322	2388.4004	3577.667	1848.7975	2400.7917	3172.607	3164.2974	4316.8574	8	8	7	7	4	11	13	8	6	Oxidation (M); Carbamidomethylation	54234.65	Coronin-1B OS=Homo sapiens OX=9606 GN=CORO1B PE=1 SV=1
66	TRUE	P08195|4F2_HUMAN	343.73846	23	244096.88	211767.42	178156.27	159482.64	6171.156	12416.112	12086.134	20771.656	23	74	64	53	56	14	13	15	19	Deamidation (NQ); Oxidation (M)	67994	4F2 cell-surface antigen heavy chain OS=Homo sapiens OX=9606 GN=SLC3A2 PE=1 SV=3
190	TRUE	P08727|K1C19_HUMAN	169.60796	11	76642.99	3919.7417	8625.67	20069.18	5083.83	3622.6187	66696.805	11958.125	8	19	12	9	13	9	13	26	9	Oxidation (M); Deamidation (NQ); Acetylation (N-term)	44105.992	Keratin, type I cytoskeletal 19 OS=Homo sapiens OX=9606 GN=KRT19 PE=1 SV=4
491	TRUE	Q9H0U3|MAGT1_HUMAN	136.9706	4	1686.5405	2093.7563	4800.749	4704.1133				429.17038	4	3	4	3	4				1	Oxidation (M)	38036.625	Magnesium transporter protein 1 OS=Homo sapiens OX=9606 GN=MAGT1 PE=1 SV=1
357	TRUE	O00443|P3C2A_HUMAN	140.13933	6	512.4027							988.76166	6	6	2					2	8		190679.56	Phosphatidylinositol 4-phosphate 3-kinase C2 domain-containing subunit alpha OS=Homo sapiens OX=9606 GN=PIK3C2A PE=1 SV=2
413	TRUE	P62070|RRAS2_HUMAN	151.32632	4	1357.9906		1593.8073	624.05994	358.7683	676.301	781.2065	565.93976	2	5	4	4	3	2	2	7	3	Oxidation (M)	23399.564	Ras-related protein R-Ras2 OS=Homo sapiens OX=9606 GN=RRAS2 PE=1 SV=1
509	TRUE	Q08188|TGM3_HUMAN	99.595764	3									3	3	2								76631.83	Protein-glutamine gamma-glutamyltransferase E OS=Homo sapiens OX=9606 GN=TGM3 PE=1 SV=4
592	TRUE	Q16222|UAP1_HUMAN	111.18066	3							350.90103	405.176	3							4	2		58769.027	UDP-N-acetylhexosamine pyrophosphorylase OS=Homo sapiens OX=9606 GN=UAP1 PE=1 SV=3
129	TRUE	P07237|PDIA1_HUMAN	270.85437	17	24349.557	14676.693	12154.088	13667.73	3470.855	6800.184	4520.6787	13862.286	17	24	22	15	16	17	17	16	19	Oxidation (M)	57116.363	Protein disulfide-isomerase OS=Homo sapiens OX=9606 GN=P4HB PE=1 SV=3
143	TRUE	O95490|AGRL2_HUMAN	254.03864	16	15173.906	36633.008	12445.345	40802.65		581.75354	20532.406		16	20	21	19	23	1	6	2	3	Oxidation (M)	163348.94	Adhesion G protein-coupled receptor L2 OS=Homo sapiens OX=9606 GN=ADGRL2 PE=1 SV=2
658	TRUE	Q9HCL2|GPAT1_HUMAN	78.347565	2		149.0531	245.4184						2		2	2	2	1	1				93794.82	Glycerol-3-phosphate acyltransferase 1, mitochondrial OS=Homo sapiens OX=9606 GN=GPAM PE=1 SV=3
472	TRUE	P35052|GPC1_HUMAN	115.32745	4									4	2	1	1	1		1				61680.223	Glypican-1 OS=Homo sapiens OX=9606 GN=GPC1 PE=1 SV=2
710	TRUE	P50552|VASP_HUMAN	88.421074	2							295.6897	134.03554	2	1						2	2	Oxidation (M)	39829.723	Vasodilator-stimulated phosphoprotein OS=Homo sapiens OX=9606 GN=VASP PE=1 SV=3
140	TRUE	P08754|GNAI3_HUMAN	260.8966	12	6809.6143	6342.997	16532.717	13857.265		629.105	2202.2612	3413.916	6	21	20	27	29	9	6	10	12	Carbamidomethylation; Oxidation (M); Deamidation (NQ)	40532.188	Guanine nucleotide-binding protein G(i) subunit alpha OS=Homo sapiens OX=9606 GN=GNAI3 PE=1 SV=3
135	TRUE	P06576|ATPB_HUMAN	231.30174	13	11105.873	10994.966	6793.8457	5790.6777	3144.883	7656.8413	5958.326	9093.66	13	16	23	13	16	10	17	13	18	Oxidation (M); Deamidation (NQ)	56559.9	ATP synthase subunit beta, mitochondrial OS=Homo sapiens OX=9606 GN=ATP5F1B PE=1 SV=3
25	TRUE	P05023|AT1A1_HUMAN	366.02365	42	102040.9	82766.41	137810.6	338590.75	10459.114	13791.594	177958.6	22408.633	34	79	85	90	97	21	19	28	30	Carbamidomethylation; Oxidation (M); Deamidation (NQ)	112896.09	Sodium/potassium-transporting ATPase subunit alpha-1 OS=Homo sapiens OX=9606 GN=ATP1A1 PE=1 SV=1
56	TRUE	P07900|HS90A_HUMAN	350.16132	29	9499.903	7676.6206	4576.2695	3593.0063	1308.9697	3861.2842	46721.215	45855.332	16	36	45	25	24	23	27	78	78	Oxidation (M); Carbamidomethylation; Deamidation (NQ)	84659.71	Heat shock protein HSP 90-alpha OS=Homo sapiens OX=9606 GN=HSP90AA1 PE=1 SV=5
236	TRUE	Q9Y487|VPP2_HUMAN	196.75444	10	1216.1133	1372.2789	4637.182	2272.4812			658.6084	1751.3386	9	6	8	10	6			4	9	Oxidation (M)	98082.32	V-type proton ATPase 116 kDa subunit a2 OS=Homo sapiens OX=9606 GN=ATP6V0A2 PE=1 SV=2
612	TRUE	O14763|TR10B_HUMAN	88.55109	2		178.59085							2	1	2								47878.3	Tumor necrosis factor receptor superfamily member 10B OS=Homo sapiens OX=9606 GN=TNFRSF10B PE=1 SV=2
376	TRUE	Q13033|STRN3_HUMAN	163.75734	6		228.81024	1105.0071	636.6731			246.81596	278.7081	6	2	2	5	3		1	5	4	Carbamidomethylation	87209.32	Striatin-3 OS=Homo sapiens OX=9606 GN=STRN3 PE=1 SV=3
555	TRUE	Q9Y2Q5|LTOR2_HUMAN	83.96013	2		194.27953	1847.1442	2399.27					2		1	2	5					Deamidation (NQ)	13507.504	Ragulator complex protein LAMTOR2 OS=Homo sapiens OX=9606 GN=LAMTOR2 PE=1 SV=1
312	TRUE	P0CG47|UBB_HUMAN	195.25371	6	166724.55	159537.78	118344.57	111537.39	30530.092	47319.48	71351.72	86326.44	6	29	35	30	24	17	19	23	19	Deamidation (NQ)	25761.639	Polyubiquitin-B OS=Homo sapiens OX=9606 GN=UBB PE=1 SV=1
304	TRUE	O95714|HERC2_HUMAN	173.6937	8	810.8641		112.46515				274.89703	1086.7472	8	4	5	1			3	3	7		527227.9	E3 ubiquitin-protein ligase HERC2 OS=Homo sapiens OX=9606 GN=HERC2 PE=1 SV=2
166	TRUE	Q96JJ7|TMX3_HUMAN	258.20074	11	2113.1497	2366.2815	24612.164	21610.504				492.1603	11	7	12	21	25		1	3	4	Oxidation (M)	51871.98	Protein disulfide-isomerase TMX3 OS=Homo sapiens OX=9606 GN=TMX3 PE=1 SV=2
314	TRUE	O94905|ERLN2_HUMAN	183.30186	6	4111.888	6517.4717	8766.003	7648.719	3159.4644	3956.8945	2391.5977	3999.8184	6	4	7	11	8	7	6	5	6	Deamidation (NQ)	37839.54	Erlin-2 OS=Homo sapiens OX=9606 GN=ERLIN2 PE=1 SV=1
23	TRUE	Q6YHK3|CD109_HUMAN	401.0099	46	300368.8	572439.5	539007.06	173861.48	27726.688	40016.375	33205.1	42314.2	46	109	124	98	87	39	46	40	48	Deamidation (NQ); Oxidation (M); Carbamidomethylation	161689.08	CD109 antigen OS=Homo sapiens OX=9606 GN=CD109 PE=1 SV=2
180	TRUE	Q9ULV4|COR1C_HUMAN	225.71048	11	5477.9106	3859.2737	3932.7769	1566.5554	1418.8099	1951.1339	6103.0195	3426.2522	11	10	10	8	4	5	9	10	9	Carbamidomethylation; Deamidation (NQ)	53249.04	Coronin-1C OS=Homo sapiens OX=9606 GN=CORO1C PE=1 SV=1
228	TRUE	P36543|VATE1_HUMAN	155.62134	6	5264.217	3835.5315	5423.012	6137.8315	276.86282	1227.7656	3035.0107	6172.412	6	6	8	10	7	1	4	5	7	Oxidation (M); Deamidation (NQ)	26145.3	V-type proton ATPase subunit E 1 OS=Homo sapiens OX=9606 GN=ATP6V1E1 PE=1 SV=1
91	TRUE	P30519|HMOX2_HUMAN	286.0225	15	23524.99	22309.05	41516.273	34247.727	2340.167	6070.854	12709	19062.459	15	27	28	45	52	15	24	27	31	Oxidation (M); Carbamidomethylation; Acetylation (N-term)	36032.867	Heme oxygenase 2 OS=Homo sapiens OX=9606 GN=HMOX2 PE=1 SV=2
643	TRUE	P49006|MRP_HUMAN	121.335144	2	1664.8323	1364.9738	3338.6587	3027.9702		265.9832	398.15463	1016.69604	2	3	3	3	3	3	3	1	2		19528.791	MARCKS-related protein OS=Homo sapiens OX=9606 GN=MARCKSL1 PE=1 SV=2
184	FALSE	Q96NW7|LRRC7_HUMAN	68.81023	2	479.4605							298.49335	2	1					1		1		172580.75	Leucine-rich repeat-containing protein 7 OS=Homo sapiens OX=9606 GN=LRRC7 PE=1 SV=1
533	TRUE	P49585|PCY1A_HUMAN	98.663605	3		667.7223					554.16473	1004.7856	3		3		1	1		2	3		41731	Choline-phosphate cytidylyltransferase A OS=Homo sapiens OX=9606 GN=PCYT1A PE=1 SV=2
187	TRUE	Q8NB49|AT11C_HUMAN	215.38608	12	4464.8228	5902.438	3306.0913	3851.4666					11	12	17	14	10				1	Carbamidomethylation; Oxidation (M)	129477.17	Phospholipid-transporting ATPase IG OS=Homo sapiens OX=9606 GN=ATP11C PE=1 SV=3
674	TRUE	Q13613|MTMR1_HUMAN	63.57393	2									2	3								Oxidation (M)	74677.76	Myotubularin-related protein 1 OS=Homo sapiens OX=9606 GN=MTMR1 PE=1 SV=4
5	TRUE	Q86UP2|KTN1_HUMAN	456.6556	87	330732.72	310637.03	391962.44	333770.28	54584.71	89702.83	168346.88	253322.42	87	194	191	191	189	110	115	160	164	Deamidation (NQ); Oxidation (M); Carbamidomethylation	156275.25	Kinectin OS=Homo sapiens OX=9606 GN=KTN1 PE=1 SV=1
566	TRUE	Q9BVT8|TMUB1_HUMAN	105.96659	3	1196.9634	823.10315	3883.49	3575.0105	294.99338	532.0016	606.0981	887.73145	3	2	1	5	4	1	1	1	1		26261.303	Transmembrane and ubiquitin-like domain-containing protein 1 OS=Homo sapiens OX=9606 GN=TMUB1 PE=1 SV=1
395	TRUE	P43121|MUC18_HUMAN	173.10345	6	2663.2285	3577.1348	1203.4684	1158.3726					6	5	8	5	4					Oxidation (M)	71607.4	Cell surface glycoprotein MUC18 OS=Homo sapiens OX=9606 GN=MCAM PE=1 SV=2
381	TRUE	Q8WUD1|RAB2B_HUMAN	163.48158	5	755.0034	1509.1843	13050.821	16182.9	454.1219	320.78894	955.50494	761.8932	5	3	4	9	13	2	2	3	3	Oxidation (M)	24214.357	Ras-related protein Rab-2B OS=Homo sapiens OX=9606 GN=RAB2B PE=1 SV=1
100	TRUE	Q9UHN6|CEIP2_HUMAN	234.33868	21	9523.379	9542.195	9299.957	2372.532			101.22193		21	29	24	15	15		1	2		Oxidation (M); Deamidation (NQ)	154373.7	Cell surface hyaluronidase OS=Homo sapiens OX=9606 GN=CEMIP2 PE=1 SV=1
326	TRUE	Q8WUM9|S20A1_HUMAN	175.25015	7	18977.062	19476.957	19700.643	15944.003	4282.848	7123.4775	8537.788	12384.949	7	14	12	11	11	8	9	7	8	Oxidation (M)	73699.67	Sodium-dependent phosphate transporter 1 OS=Homo sapiens OX=9606 GN=SLC20A1 PE=1 SV=1
360	TRUE	P08473|NEP_HUMAN	169.49808	6	1481.5822	1014.43713		250.37674					6	5	7		3					Oxidation (M)	85513.93	Neprilysin OS=Homo sapiens OX=9606 GN=MME PE=1 SV=2
490	TRUE	O43464|HTRA2_HUMAN	142.92944	4			2322.4214	4159.418					4			6	7						48840.848	Serine protease HTRA2, mitochondrial OS=Homo sapiens OX=9606 GN=HTRA2 PE=1 SV=2
268	TRUE	Q7Z2K8|GRIN1_HUMAN	199.61626	9	3197.4585	2987.3374	1796.241	1694.3579	455.7241	1300.7949	1903.7876	2526.8037	9	11	9	3	2	6	8	5	5	Oxidation (M)	102399.29	G protein-regulated inducer of neurite outgrowth 1 OS=Homo sapiens OX=9606 GN=GPRIN1 PE=1 SV=2
224	TRUE	P19784|CSK22_HUMAN	198.9493	8	4398.299	2183.2993	3016.289	3662.9932			1198.4471	1164.2406	8	10	7	7	6	1	1	3	7	Oxidation (M); Deamidation (NQ)	41213.23	Casein kinase II subunit alpha' OS=Homo sapiens OX=9606 GN=CSNK2A2 PE=1 SV=1
321	TRUE	P61421|VA0D1_HUMAN	164.70604	7	2076.3457	1257.2643	6339.5156	10243.723	282.95535		1272.7521	1602.0093	7	4	4	9	8	1		2	3	Carbamidomethylation	40329.094	V-type proton ATPase subunit d 1 OS=Homo sapiens OX=9606 GN=ATP6V0D1 PE=1 SV=1
516	TRUE	Q6IQ22|RAB12_HUMAN	134.40271	3	785.75085	636.24316	2121.416	1830.194		377.06357		926.7448	2	6	8	9	11	5	7	5	8		27248.398	Ras-related protein Rab-12 OS=Homo sapiens OX=9606 GN=RAB12 PE=1 SV=3
42	TRUE	P29317|EPHA2_HUMAN	330.92307	32	205036.38	182842.28	135188.9	107674.055	9490.345	16210.603	14143.777	20804.014	30	101	89	69	74	17	29	17	33	Oxidation (M); Carbamidomethylation; Deamidation (NQ)	108266.41	Ephrin type-A receptor 2 OS=Homo sapiens OX=9606 GN=EPHA2 PE=1 SV=2
296	TRUE	P18085|ARF4_HUMAN	171.81075	5	6414.7847	5459.66	3439.2778	3145.8	1337.598	3118.428	3217.285	4134.0444	2	9	10	9	8	9	10	15	10	Oxidation (M)	20510.771	ADP-ribosylation factor 4 OS=Homo sapiens OX=9606 GN=ARF4 PE=1 SV=3
72	TRUE	P10809|CH60_HUMAN	283.92853	21	28112.33	23191.033	32965.656	32933.523	2792.3882	7587.7075	7993.042	11267.433	21	25	41	32	38	15	19	24	22	Carbamidomethylation; Oxidation (M); Deamidation (NQ)	61054.63	60 kDa heat shock protein, mitochondrial OS=Homo sapiens OX=9606 GN=HSPD1 PE=1 SV=2
596	TRUE	P0DP23|CALM1_HUMAN	70.866234	2				1532.3604					2			2	3						16837.582	Calmodulin-1 OS=Homo sapiens OX=9606 GN=CALM1 PE=1 SV=1
254	TRUE	Q5JWF2|GNAS1_HUMAN	198.0572	8	2186.406	888.91235	6919.8096	7519.584		104.35363	532.3558	557.4383	6	12	9	15	13	4	3	6	10	Oxidation (M)	111024.516	Guanine nucleotide-binding protein G(s) subunit alpha isoforms XLas OS=Homo sapiens OX=9606 GN=GNAS PE=1 SV=2
151	TRUE	Q15262|PTPRK_HUMAN	243.72015	15	4101.029	5699.5864	5478.744	5712.1123	459.66998	4081.755	2857.245	5386.864	14	20	13	19	16	5	9	3	13	Oxidation (M); Carbamidomethylation	162102.14	Receptor-type tyrosine-protein phosphatase kappa OS=Homo sapiens OX=9606 GN=PTPRK PE=1 SV=2
274	TRUE	Q15758|AAAT_HUMAN	188.6862	8	4835.341	5940.511	10664.746	12393.34	888.2656	1864.5438	1489.9656	2772.3513	8	4	6	13	9	2	3	3	6	Carbamidomethylation; Acetylation (N-term); Oxidation (M); Deamidation (NQ)	56598.336	Neutral amino acid transporter B(0) OS=Homo sapiens OX=9606 GN=SLC1A5 PE=1 SV=2
177	TRUE	Q9Y490|TLN1_HUMAN	191.98401	13							997511.6	1234.0979	13							10	7		269767.06	Talin-1 OS=Homo sapiens OX=9606 GN=TLN1 PE=1 SV=3
457	TRUE	O15126|SCAM1_HUMAN	144.38507	4		97.29108	3790.269	3053.2756					4		1	5	7					Oxidation (M)	37920.426	Secretory carrier-associated membrane protein 1 OS=Homo sapiens OX=9606 GN=SCAMP1 PE=1 SV=2
241	TRUE	Q9UI12|VATH_HUMAN	210.76633	9	3355.0566	2939.262	5979.5244	4883.787	502.8532	1244.6813	2207.631	5748.4526	9	10	9	6	4	1	3	3	6	Oxidation (M)	55883.066	V-type proton ATPase subunit H OS=Homo sapiens OX=9606 GN=ATP6V1H PE=1 SV=1
436	TRUE	P22694|KAPCB_HUMAN	128.60762	5	1476.3124	1400.1743	222.96594	201.61194	146.199		1103.6729	1244.8789	5	3	4	2	1	3	2	3	4	Oxidation (M)	40622.69	cAMP-dependent protein kinase catalytic subunit beta OS=Homo sapiens OX=9606 GN=PRKACB PE=1 SV=2
437	TRUE	Q7L5Y9|MAEA_HUMAN	149.58875	5	1913.573	2099.3645	730.24414	476.02615	443.3258	483.89728	1676.6155	1887.2847	5	4	7	4	2	3	8	7	6		45287.285	E3 ubiquitin-protein transferase MAEA OS=Homo sapiens OX=9606 GN=MAEA PE=1 SV=1
111	TRUE	Q5JTH9|RRP12_HUMAN	295.17856	19	5468.365	10345.045	5758.6387	6832.302	5527.9404	3727.0156	5219.1357	14285.305	19	16	21	11	15	10	14	20	15	Oxidation (M); Carbamidomethylation	143702.1	RRP12-like protein OS=Homo sapiens OX=9606 GN=RRP12 PE=1 SV=2
245	TRUE	P00749|UROK_HUMAN	210.6923	8	12012.676	13531.758	10557.939	9112.541	1520.9126	2085.0662	3412.12	1644.7085	8	17	17	15	12	2	7	4	6	Oxidation (M)	48507.418	Urokinase-type plasminogen activator OS=Homo sapiens OX=9606 GN=PLAU PE=1 SV=2
412	TRUE	Q96SB4|SRPK1_HUMAN	127.901955	5								1292.1315	5	4	2						6	Oxidation (M)	74324.77	SRSF protein kinase 1 OS=Homo sapiens OX=9606 GN=SRPK1 PE=1 SV=2
576	TRUE	Q8N2K0|ABD12_HUMAN	99.68759	3	1480.4305			1187.209			1588.9648	1871.571	3	4	1	1	3		1	3	3		45096.758	Lysophosphatidylserine lipase ABHD12 OS=Homo sapiens OX=9606 GN=ABHD12 PE=1 SV=2
548	TRUE	P15529|MCP_HUMAN	123.30559	3	6130.6978	4846.171	3979.556	3360.3547	309.0024	797.38605	406.77542	729.70416	3	4	4	5	4	2	1	1	2		43747.305	Membrane cofactor protein OS=Homo sapiens OX=9606 GN=CD46 PE=1 SV=3
622	TRUE	P25311|ZA2G_HUMAN	91.21562	2	662.202	1559.6682						1076.8226	2	1	2	1					2		34258.715	Zinc-alpha-2-glycoprotein OS=Homo sapiens OX=9606 GN=AZGP1 PE=1 SV=2
524	TRUE	Q9UQB8|BAIP2_HUMAN	99.27392	3	377.2503	254.7308						584.1465	3	1	2					1	3		60867.598	Brain-specific angiogenesis inhibitor 1-associated protein 2 OS=Homo sapiens OX=9606 GN=BAIAP2 PE=1 SV=1
369	TRUE	O95817|BAG3_HUMAN	180.44637	6	2208.387	8831.278		260.2458		348.9961	3389.935	2652.9534	6	2	5		1		1	6	7		61594.684	BAG family molecular chaperone regulator 3 OS=Homo sapiens OX=9606 GN=BAG3 PE=1 SV=3
86	TRUE	O00159|MYO1C_HUMAN	289.62964	21	2676.9358	3671.193	8742.6	16337.328		321.64133	577.79065	382.13474	20	13	12	23	30		4	2	8	Carbamidomethylation; Deamidation (NQ); Oxidation (M)	121681.67	Unconventional myosin-Ic OS=Homo sapiens OX=9606 GN=MYO1C PE=1 SV=4
396	TRUE	Q9Y6M5|ZNT1_HUMAN	159.68845	4	2543.1445	2870.7314	2085.3384	711.0386			216.36993	356.31024	4	6	5	8	3			1	2	Deamidation (NQ)	55299.81	Zinc transporter 1 OS=Homo sapiens OX=9606 GN=SLC30A1 PE=1 SV=3
515	TRUE	Q9BXP2|S12A9_HUMAN	123.95183	3	83.878525		1298.1631	1258.1677					3	1	1	6	5						96109.68	Solute carrier family 12 member 9 OS=Homo sapiens OX=9606 GN=SLC12A9 PE=1 SV=1
252	FALSE	P50148|GNAQ_HUMAN	101.7381	3			1931.034	2554.9087					2			5	4					Oxidation (M)	42142.086	Guanine nucleotide-binding protein G(q) subunit alpha OS=Homo sapiens OX=9606 GN=GNAQ PE=1 SV=4
368	TRUE	P10586|PTPRF_HUMAN	137.55736	6	371.3782	737.373	195.59918						6	6	5	1						Oxidation (M)	212878.88	Receptor-type tyrosine-protein phosphatase F OS=Homo sapiens OX=9606 GN=PTPRF PE=1 SV=2
194	TRUE	Q8NBU5|ATAD1_HUMAN	215.2194	10	8754.546	8990.783	11102.889	8843.534	2510.5703	4633.5874	7324.178	8882.618	10	11	10	16	12	4	9	11	10	Carbamidomethylation; Deamidation (NQ); Oxidation (M)	40744.03	ATPase family AAA domain-containing protein 1 OS=Homo sapiens OX=9606 GN=ATAD1 PE=1 SV=1
139	TRUE	P61106|RAB14_HUMAN	269.92758	13	18164.49	19873.13	50454.336	40410.85	2371.0571	4156.231	13404.63	15670.039	12	21	27	38	41	20	24	21	26	Deamidation (NQ); Oxidation (M)	23896.941	Ras-related protein Rab-14 OS=Homo sapiens OX=9606 GN=RAB14 PE=1 SV=4
222	TRUE	O43159|RRP8_HUMAN	202.93048	7	2613.3782	2582.4585	135.51295	1491.5194	510.00122	1236.8489	453.71008	3579.5232	7	12	6	4	11	6	11	6	10	Deamidation (NQ)	50714.76	Ribosomal RNA-processing protein 8 OS=Homo sapiens OX=9606 GN=RRP8 PE=1 SV=2
192	TRUE	O43491|E41L2_HUMAN	216.4061	12	2507.2627	2129.3474	4576.553	5713.5728		373.90057	2054.2356	3924.8372	12	8	13	12	12	1	1	11	9	Oxidation (M)	112588.08	Band 4.1-like protein 2 OS=Homo sapiens OX=9606 GN=EPB41L2 PE=1 SV=1
436	FALSE	P17612|KAPCA_HUMAN	79.859276	2	480.38257	880.3419	222.96594	201.61194			469.85663	302.90277	2	1	2	2	1	2	1	2	1		40589.664	cAMP-dependent protein kinase catalytic subunit alpha OS=Homo sapiens OX=9606 GN=PRKACA PE=1 SV=2
214	TRUE	P55011|S12A2_HUMAN	214.56815	11	646.50903	2630.505	6998.8022	4620.826			590.7302	1544.0066	11	4	6	15	14			3	5		131447.11	Solute carrier family 12 member 2 OS=Homo sapiens OX=9606 GN=SLC12A2 PE=1 SV=1
114	TRUE	P46459|NSF_HUMAN	268.30948	20	6386.8833	8127.1855	19302.598	20261.396	853.1271	2033.4003	4880.7144	4491.5664	20	8	19	25	31	4	5	11	10	Oxidation (M); Carbamidomethylation	82594.34	Vesicle-fusing ATPase OS=Homo sapiens OX=9606 GN=NSF PE=1 SV=3
653	TRUE	P22735|TGM1_HUMAN	69.73644	2	1625.5746						267.57803	388.3462	2	2						1	1		89786.7	Protein-glutamine gamma-glutamyltransferase K OS=Homo sapiens OX=9606 GN=TGM1 PE=1 SV=4
144	TRUE	P32004|L1CAM_HUMAN	236.76413	16	7855.3706	7551.637	3449.13	1893.6317					16	17	22	16	11	1				Oxidation (M)	140002.78	Neural cell adhesion molecule L1 OS=Homo sapiens OX=9606 GN=L1CAM PE=1 SV=2
52	TRUE	P08238|HS90B_HUMAN	338.82544	28	27143.15	38141.53	10515.034	12382.773	6705.714	9996.348	69603.52	62396.656	14	57	67	42	40	38	38	96	97	Oxidation (M); Deamidation (NQ); Carbamidomethylation	83264.195	Heat shock protein HSP 90-beta OS=Homo sapiens OX=9606 GN=HSP90AB1 PE=1 SV=4
542	TRUE	Q9P1W3|CSC1_HUMAN	62.37296	2	486502.78	127721.12	524084.66	459809.5	292838.84	402590.16	427495.78	517027.8	2	6	4	10	6	6	7	10	13	Acetylation (N-term); Oxidation (M)	93316.63	Calcium permeable stress-gated cation channel 1 OS=Homo sapiens OX=9606 GN=TMEM63C PE=2 SV=1
573	TRUE	P55085|PAR2_HUMAN	106.36945	3	114.71646	95.61427							3	1	3	4	2				1	Oxidation (M)	44126.336	Proteinase-activated receptor 2 OS=Homo sapiens OX=9606 GN=F2RL1 PE=1 SV=1
654	TRUE	Q15014|MO4L2_HUMAN	79.99219	2	1003.6527	631.89264					650.89014		2	2	1					1			32307.85	Mortality factor 4-like protein 2 OS=Homo sapiens OX=9606 GN=MORF4L2 PE=1 SV=1
577	TRUE	P35613|BASI_HUMAN	98.86378	2	2460.8276	3913.2827	2036.428	3447.6523					2	5	5	6	3					Oxidation (M)	42200.363	Basigin OS=Homo sapiens OX=9606 GN=BSG PE=1 SV=2
646	TRUE	P08575|PTPRC_HUMAN	70.7753	2	1152.4227	775.0445	759.3052						2	3	2	1	1						147486.48	Receptor-type tyrosine-protein phosphatase C OS=Homo sapiens OX=9606 GN=PTPRC PE=1 SV=3
359	TRUE	Q9HCK8|CHD8_HUMAN	137.11812	6	847.0135	393.50513	528.3555	565.0949				364.71637	6	3	2	2	1	1			4		290519.06	Chromodomain-helicase-DNA-binding protein 8 OS=Homo sapiens OX=9606 GN=CHD8 PE=1 SV=5
488	TRUE	P30825|SL7A1_HUMAN	110.87721	4	63.075157	346.94873	796.8344	852.1843					4	1	2	2	5					Carbamidomethylation	67638.37	High affinity cationic amino acid transporter 1 OS=Homo sapiens OX=9606 GN=SLC7A1 PE=1 SV=1
416	TRUE	P51159|RB27A_HUMAN	159.48419	4	1589.0317	4694.8193	3980.809	1774.4086	447.8331	2906.247	3337.2832	3455.607	3	10	10	13	12	7	9	8	10	Deamidation (NQ)	24868.068	Ras-related protein Rab-27A OS=Homo sapiens OX=9606 GN=RAB27A PE=1 SV=3
152	TRUE	Q8NHP6|MSPD2_HUMAN	239.65158	11	6564.85	9583.42	19171.111	16824.707		1777.2715	4031.3677	6626.4814	11	11	10	20	15	2	5	8	9	Oxidation (M); Deamidation (NQ)	59746.176	Motile sperm domain-containing protein 2 OS=Homo sapiens OX=9606 GN=MOSPD2 PE=1 SV=1
281	TRUE	Q9BTX1|NDC1_HUMAN	161.07422	7	617.7799	1984.3431	2557.514	846.4508		323.32257	962.5975	2557.0154	7	4	10	3	4		5	5	8	Oxidation (M)	76304.805	Nucleoporin NDC1 OS=Homo sapiens OX=9606 GN=NDC1 PE=1 SV=2
227	TRUE	Q92542|NICA_HUMAN	173.81361	9	1431.0522	2582.2366	5520.8223	2123.1697					9	6	6	4	11					Deamidation (NQ); Oxidation (M)	78410.92	Nicastrin OS=Homo sapiens OX=9606 GN=NCSTN PE=1 SV=2
398	TRUE	Q6NSJ5|LRC8E_HUMAN	173.48668	5	1484.5427		1838.2527	776.43207					5	4	5	4	3						90247.19	Volume-regulated anion channel subunit LRRC8E OS=Homo sapiens OX=9606 GN=LRRC8E PE=1 SV=2
393	TRUE	O75110|ATP9A_HUMAN	140.23859	6	217.20525	673.21533	716.60925	389.274				11804.9	6	2	3	6	4			1	2	Oxidation (M)	118582.52	Probable phospholipid-transporting ATPase IIA OS=Homo sapiens OX=9606 GN=ATP9A PE=1 SV=3
473	TRUE	P57105|SYJ2B_HUMAN	130.96634	4			3110.1997	4405.957					4	2	1	8	7			1		Deamidation (NQ)	15928.054	Synaptojanin-2-binding protein OS=Homo sapiens OX=9606 GN=SYNJ2BP PE=1 SV=2
54	FALSE	Q9HCM2|PLXA4_HUMAN	178.21796	6	5118.9736	4060.6309	1931.6548	1427.0258					3	8	11	7	7		2	2	2	Oxidation (M)	212454.95	Plexin-A4 OS=Homo sapiens OX=9606 GN=PLXNA4 PE=1 SV=4
665	TRUE	P19256|LFA3_HUMAN	88.09534	2	9682.324	7426.4023	5388.5845	4945.163		320.10458			2	4	4	2	2		2			Oxidation (M)	28147.377	Lymphocyte function-associated antigen 3 OS=Homo sapiens OX=9606 GN=CD58 PE=1 SV=1
702	TRUE	P17152|TMM11_HUMAN	63.321186	2			1545.6294	1850.5759					2			2	1						21540.771	Transmembrane protein 11, mitochondrial OS=Homo sapiens OX=9606 GN=TMEM11 PE=1 SV=1
704	TRUE	P01876|IGHA1_HUMAN	71.2267	2	1207.8646								2	2									37654.64	Immunoglobulin heavy constant alpha 1 OS=Homo sapiens OX=9606 GN=IGHA1 PE=1 SV=2
597	TRUE	Q8WWI1|LMO7_HUMAN	66.92787	2									2		1					1	1	Oxidation (M)	192695.64	LIM domain only protein 7 OS=Homo sapiens OX=9606 GN=LMO7 PE=1 SV=3
526	TRUE	Q01650|LAT1_HUMAN	159.58574	3	24026.71	21114.617	17371.121	16348.731	425.41592	451.40204	891.75073	1603.389	3	9	9	7	8	1	1	5	2		55010.24	Large neutral amino acids transporter small subunit 1 OS=Homo sapiens OX=9606 GN=SLC7A5 PE=1 SV=2
387	TRUE	P63000|RAC1_HUMAN	159.97113	6	576.16943		5058.205	4890.5234					6	3		9	8				1	Oxidation (M); Acetylation (N-term); Deamidation (NQ); Carbamidomethylation	21450.102	Ras-related C3 botulinum toxin substrate 1 OS=Homo sapiens OX=9606 GN=RAC1 PE=1 SV=1
251	TRUE	P13591|NCAM1_HUMAN	191.82275	9	4806.9414	3973.9287	1781.2637	1034.0549					9	12	14	7	8					Oxidation (M)	94574.164	Neural cell adhesion molecule 1 OS=Homo sapiens OX=9606 GN=NCAM1 PE=1 SV=3
75	FALSE	Q6U841|S4A10_HUMAN	88.414085	2	1695.3547	1018.6413	6057.8755	2509.608				1061.5073	2	1	2	6	2		1		2	Oxidation (M)	125946.266	Sodium-driven chloride bicarbonate exchanger OS=Homo sapiens OX=9606 GN=SLC4A10 PE=1 SV=1
482	TRUE	Q9ULC3|RAB23_HUMAN	160.73198	4			1001.0595	1241.2367					4			9	7					Carbamidomethylation	26659.24	Ras-related protein Rab-23 OS=Homo sapiens OX=9606 GN=RAB23 PE=1 SV=1
238	TRUE	P54709|AT1B3_HUMAN	217.14758	9	25265.932	17949.81	20015.645	11545.596					9	19	17	12	15					Oxidation (M)	31512.578	Sodium/potassium-transporting ATPase subunit beta-3 OS=Homo sapiens OX=9606 GN=ATP1B3 PE=1 SV=1
145	TRUE	P18084|ITB5_HUMAN	269.48828	13	45920.754	61996.477	41746.7	29397.248	3213.3157	7528.691	3909.396	5762.3994	13	36	31	24	26	6	7	9	8	Oxidation (M)	88054.21	Integrin beta-5 OS=Homo sapiens OX=9606 GN=ITGB5 PE=1 SV=1
626	TRUE	O14910|LIN7A_HUMAN	82.71184	2	729.31	381.8401	312.4068	894.0752		161.61244	365.4015	488.81418	2	1	1	3	2		1	1	3		25996.723	Protein lin-7 homolog A OS=Homo sapiens OX=9606 GN=LIN7A PE=1 SV=2
632	TRUE	Q96EY7|PTCD3_HUMAN	71.27435	2	289.3168							104.94086	2	1	1						1		78549.69	Pentatricopeptide repeat domain-containing protein 3, mitochondrial OS=Homo sapiens OX=9606 GN=PTCD3 PE=1 SV=3
470	TRUE	P27105|STOM_HUMAN	153.25034	4	1762.7081	376.85623	938.41504	609.0695				159.26169	4	5	6	10	5				1	Oxidation (M)	31730.791	Stomatin OS=Homo sapiens OX=9606 GN=STOM PE=1 SV=3
94	TRUE	Q86YZ3|HORN_HUMAN	248.36217	15	11234.555	629.2156	1713.8157	1163.2866	1220.126	374.66724	1259.4501	745.7142	15	30	6	6	10	11	7	11	8	Deamidation (NQ)	282389.9	Hornerin OS=Homo sapiens OX=9606 GN=HRNR PE=1 SV=2
15	TRUE	P17301|ITA2_HUMAN	397.39563	46	458398.47	410063.75	299734.1	222700.6	26163.37	41096.2	38258.11	49751.004	46	160	158	120	108	36	53	46	59	Carbamidomethylation; Deamidation (NQ); Oxidation (M)	129295.44	Integrin alpha-2 OS=Homo sapiens OX=9606 GN=ITGA2 PE=1 SV=1
199	TRUE	P20930|FILA_HUMAN	182.30618	10	2456.7512	26204.252	419.63876		588.04724	1445.8927	1438.0688	5341.644	10	9	18	4	2	5	5	3	7	Oxidation (M); Deamidation (NQ)	435169.53	Filaggrin OS=Homo sapiens OX=9606 GN=FLG PE=1 SV=3
8	TRUE	P08670|VIME_HUMAN	422.3661	62	495611.44	537836.44	1087807.1	3114825.2	104023.46	335749.75	250680.34	1089011.6	61	141	140	198	412	73	113	107	206	Oxidation (M); Deamidation (NQ); Carbamidomethylation	53651.676	Vimentin OS=Homo sapiens OX=9606 GN=VIM PE=1 SV=4
388	TRUE	Q96QD8|S38A2_HUMAN	188.87376	4	6624.1577	7903.785	11916.129	9564.48	321.49942	642.9774	2406.1453	3433.122	4	6	12	9	10	2	2	3	2	Deamidation (NQ)	56026.004	Sodium-coupled neutral amino acid transporter 2 OS=Homo sapiens OX=9606 GN=SLC38A2 PE=1 SV=2
442	TRUE	P09496|CLCA_HUMAN	128.90883	5	954.84424	1714.6123	1019.5588	3789.7366		933.62854	1282.6539	1956.4602	4	2	3	3	6		3	2	1	Carbamidomethylation	27076.69	Clathrin light chain A OS=Homo sapiens OX=9606 GN=CLTA PE=1 SV=1
14	TRUE	P49327|FAS_HUMAN	413.1325	61	24946.766	29220.555	1900.3613	591.25696		2614.6367	62672.406	66398.94	61	55	63	14	9	6	19	107	91	Carbamidomethylation; Deamidation (NQ); Oxidation (M)	273426.6	Fatty acid synthase OS=Homo sapiens OX=9606 GN=FASN PE=1 SV=3
423	TRUE	Q15019|SEPT2_HUMAN	162.73822	4	1705.1202	1334.0571	1181.2147	4308.429		199.33038	2772.6223	2959.891	4	3	5	3	4	1	4	4	4	Deamidation (NQ)	41487.47	Septin-2 OS=Homo sapiens OX=9606 GN=SEPTIN2 PE=1 SV=1
112	TRUE	Q07666|KHDR1_HUMAN	275.59906	17	78729.586	81290.586	39086.426	49239.957	33384.957	48042.445	104941.56	120535.58	17	37	43	33	37	32	43	49	45	Oxidation (M)	48227.332	KH domain-containing, RNA-binding, signal transduction-associated protein 1 OS=Homo sapiens OX=9606 GN=KHDRBS1 PE=1 SV=1
185	TRUE	O75534|CSDE1_HUMAN	202.99486	9	2182.8066	1514.4907	219.81848				3628.201	6958.349	9	6	4	2			1	13	17	Deamidation (NQ); Oxidation (M)	88884.66	Cold shock domain-containing protein E1 OS=Homo sapiens OX=9606 GN=CSDE1 PE=1 SV=2
489	TRUE	P67870|CSK2B_HUMAN	134.48938	3	2204.7766	1961.002	2234.8987	3928.108		445.32193	1673.5205	3376.9363	3	5	5	3	4	1	1	4	4	Oxidation (M); Deamidation (NQ); Carbamidomethylation	24942.416	Casein kinase II subunit beta OS=Homo sapiens OX=9606 GN=CSNK2B PE=1 SV=1
713	TRUE	P32970|CD70_HUMAN	100.17331	2	1494.2646								2	2		1	2						21118.377	CD70 antigen OS=Homo sapiens OX=9606 GN=CD70 PE=1 SV=2
363	TRUE	Q9H8M5|CNNM2_HUMAN	128.46895	5	721.09705	129.88959					237.70834		3	10	7	3	3			1		Carbamidomethylation; Oxidation (M)	96623.27	Metal transporter CNNM2 OS=Homo sapiens OX=9606 GN=CNNM2 PE=1 SV=2
391	TRUE	P04632|CPNS1_HUMAN	137.08539	5	76.02177	235.70953					675.58655		5	4	6			1	1	4	3	Acetylation (N-term); Oxidation (M); Carbamidomethylation; Deamidation (NQ)	28315.707	Calpain small subunit 1 OS=Homo sapiens OX=9606 GN=CAPNS1 PE=1 SV=1
191	TRUE	O95793|STAU1_HUMAN	228.52928	12	4698.449	4108.42	1320.717	2611.7861	126.78598	1377.6422	5422.004	4505.4004	12	11	10	8	8	1	5	13	11	Oxidation (M); Deamidation (NQ)	63182.277	Double-stranded RNA-binding protein Staufen homolog 1 OS=Homo sapiens OX=9606 GN=STAU1 PE=1 SV=2
176	TRUE	Q9NR28|DBLOH_HUMAN	228.98532	9	1057.5045	864.3518	27541.43	23597.7			88.131065	981.9269	9	3	3	23	21			2	2	Oxidation (M); Deamidation (NQ)	27130.809	Diablo homolog, mitochondrial OS=Homo sapiens OX=9606 GN=DIABLO PE=1 SV=1
366	TRUE	Q9Y5G0|PCDGH_HUMAN	165.39098	6	619.78467	371.34238	285.7614	494.3375	178.22516	208.56	505.4839	746.1726	2	5	6	7	6	2	2	4	3	Oxidation (M)	99875.125	Protocadherin gamma-B5 OS=Homo sapiens OX=9606 GN=PCDHGB5 PE=2 SV=1
408	TRUE	Q8TCZ2|C99L2_HUMAN	153.09299	5	9668.629	4378.7812	3461.9224	2920.6958					5	11	11	10	6					Carbamidomethylation	27985.883	CD99 antigen-like protein 2 OS=Homo sapiens OX=9606 GN=CD99L2 PE=1 SV=1
435	TRUE	Q86W92|LIPB1_HUMAN	149.51021	5	1370.2288	2193.5688			138.06052	701.48376	1067.1869	2369.5537	5	2	8			5	3	5	5	Oxidation (M)	114024.09	Liprin-beta-1 OS=Homo sapiens OX=9606 GN=PPFIBP1 PE=1 SV=2
218	TRUE	Q8TDW0|LRC8C_HUMAN	182.99017	10	3382.8418	2689.0544	3029.273	1152.728			96.67531		10	4	10	8	5		1	1			92449.55	Volume-regulated anion channel subunit LRRC8C OS=Homo sapiens OX=9606 GN=LRRC8C PE=1 SV=2
312	TRUE	P62979|RS27A_HUMAN	195.25371	6	166724.55	159537.78	118344.57	111537.39	30530.092	47319.48	71351.72	86326.44	6	29	35	30	24	17	19	23	19	Deamidation (NQ)	17964.914	Ubiquitin-40S ribosomal protein S27a OS=Homo sapiens OX=9606 GN=RPS27A PE=1 SV=2
638	TRUE	Q15382|RHEB_HUMAN	115.32675	2		2855.0723			1810.5312	2199.9636	1868.8684	1076.8263	2	1	3			4	3	4	3		20497.48	GTP-binding protein Rheb OS=Homo sapiens OX=9606 GN=RHEB PE=1 SV=1
60	TRUE	P23229|ITA6_HUMAN	347.27847	27	90054.78	70289.51	50421.867	37962.41	1271.2478	2742.4282	1376.3352	3032.8933	27	59	67	49	45	8	11	14	10	Deamidation (NQ); Oxidation (M)	126605.5	Integrin alpha-6 OS=Homo sapiens OX=9606 GN=ITGA6 PE=1 SV=5
303	TRUE	P08069|IGF1R_HUMAN	186.18103	8	1519.2517	1900.117	841.92145	479.3496					5	9	11	6	4				1	Oxidation (M)	154793.05	Insulin-like growth factor 1 receptor OS=Homo sapiens OX=9606 GN=IGF1R PE=1 SV=1
104	TRUE	Q6P4Q7|CNNM4_HUMAN	303.88965	16	27222.7	24418.527	13323.6045	8661.611		1122.9749	2149.745	3247.1565	13	39	30	22	20	1	4	5	9	Carbamidomethylation; Deamidation (NQ); Oxidation (M)	86606.89	Metal transporter CNNM4 OS=Homo sapiens OX=9606 GN=CNNM4 PE=1 SV=3
417	TRUE	Q9NW15|ANO10_HUMAN	140.69052	4	225.20157		894.0863	40.917137					4	1	1	5	5					Oxidation (M); Deamidation (NQ)	76329.36	Anoctamin-10 OS=Homo sapiens OX=9606 GN=ANO10 PE=1 SV=2
80	TRUE	Q5UIP0|RIF1_HUMAN	265.40347	24	7063.2207	5923.8105	770.09625	931.295	617.66736	1774.0627	846.06995	4652.5723	24	18	23	4	7	8	13	8	14	Oxidation (M); Deamidation (NQ)	274465.6	Telomere-associated protein RIF1 OS=Homo sapiens OX=9606 GN=RIF1 PE=1 SV=2
624	TRUE	P48029|SC6A8_HUMAN	62.283264	2			1068.9537	1073.0205					2			2	2						70522.77	Sodium- and chloride-dependent creatine transporter 1 OS=Homo sapiens OX=9606 GN=SLC6A8 PE=1 SV=1
655	TRUE	P61769|B2MG_HUMAN	123.551834	2	9629.346	8146.634	8909.038	7338.19		500.33856	860.7023	1098.2107	2	6	9	7	8	2	4	2	2		13714.561	Beta-2-microglobulin OS=Homo sapiens OX=9606 GN=B2M PE=1 SV=1
568	TRUE	Q13009|TIAM1_HUMAN	81.07839	3	229.72014						179.6877		3	2	2					1		Carbamidomethylation	177508.17	T-lymphoma invasion and metastasis-inducing protein 1 OS=Homo sapiens OX=9606 GN=TIAM1 PE=1 SV=2
28	TRUE	P46940|IQGA1_HUMAN	374.16852	44	25245.572	24479.572	6152.9946	7118.9907	1480.4788	4817.5103	36542.594	41727.44	42	40	62	21	25	14	21	64	61	Deamidation (NQ); Oxidation (M); Carbamidomethylation; Acetylation (N-term)	189251.97	Ras GTPase-activating-like protein IQGAP1 OS=Homo sapiens OX=9606 GN=IQGAP1 PE=1 SV=1
332	TRUE	Q04656|ATP7A_HUMAN	172.97171	7	1921.5398	545.12286				325.6547		838.0512	7	7	3	3	2	1	2	2	6	Oxidation (M)	163372.77	Copper-transporting ATPase 1 OS=Homo sapiens OX=9606 GN=ATP7A PE=1 SV=4
339	TRUE	Q8IXI1|MIRO2_HUMAN	173.71378	7	2153.9456	1449.0532	2342.82	1489.7991	109.48654	519.58124	1141.9763	1106.5023	5	10	9	8	8	4	4	8	5		68117.83	Mitochondrial Rho GTPase 2 OS=Homo sapiens OX=9606 GN=RHOT2 PE=1 SV=2
217	TRUE	Q13425|SNTB2_HUMAN	180.67307	9	3051.0798	2503.4563	807.51447	794.52216	447.92706	448.52194	1649.0198	2008.0059	9	10	10	3	4	6	8	10	11	Oxidation (M)	57949.59	Beta-2-syntrophin OS=Homo sapiens OX=9606 GN=SNTB2 PE=1 SV=1
659	TRUE	P0DOX7|IGK_HUMAN	139.44156	2	2455.984								2	7	2	1				2	1		23379.074	Immunoglobulin kappa light chain OS=Homo sapiens OX=9606 PE=1 SV=1
53	TRUE	P05556|ITB1_HUMAN	321.02188	26	1032913.1	999205.9	624829.25	569323.06	76397.06	107517.13	91483.41	107670.336	26	153	130	114	102	50	53	46	45	Oxidation (M); Deamidation (NQ)	88415.266	Integrin beta-1 OS=Homo sapiens OX=9606 GN=ITGB1 PE=1 SV=2
466	TRUE	Q15904|VAS1_HUMAN	162.94257	4			1205.2625	2093.935					4			3	9						52025.812	V-type proton ATPase subunit S1 OS=Homo sapiens OX=9606 GN=ATP6AP1 PE=1 SV=2
95	TRUE	O95573|ACSL3_HUMAN	273.27356	18	13045.1455	14295.07	35598.72	34411.35	1166.6173	3028.8894	5156.659	9971.507	16	22	24	41	37	9	14	16	16	Oxidation (M); Deamidation (NQ); Acetylation (N-term); Carbamidomethylation	80420.086	Long-chain-fatty-acid--CoA ligase 3 OS=Homo sapiens OX=9606 GN=ACSL3 PE=1 SV=3
371	TRUE	P63167|DYL1_HUMAN	130.474	3	28574.312	23942.518	12887.497	13797.732	8304.068	14397.422	18915.322	28606.262	3	8	8	3	6	4	7	10	10	Oxidation (M); Carbamidomethylation	10365.876	Dynein light chain 1, cytoplasmic OS=Homo sapiens OX=9606 GN=DYNLL1 PE=1 SV=1
289	TRUE	P60953|CDC42_HUMAN	189.81078	8	352.91125		6017.4336	8791.828				290.51428	8	3	2	12	13			1	1	Carbamidomethylation	21258.604	Cell division control protein 42 homolog OS=Homo sapiens OX=9606 GN=CDC42 PE=1 SV=2
198	TRUE	Q8IVF7|FMNL3_HUMAN	209.12923	11	2105.1108	1966.7495	2655.7207	2428.17		349.06967	1134.9678	2400.6418	11	6	10	5	4		4	6	7	Oxidation (M)	117212.83	Formin-like protein 3 OS=Homo sapiens OX=9606 GN=FMNL3 PE=1 SV=3
503	TRUE	P98196|AT11A_HUMAN	111.78775	4	1029.4495	497.62537	798.09827	847.0917					3	6	3	4	5		1				129755.74	Probable phospholipid-transporting ATPase IH OS=Homo sapiens OX=9606 GN=ATP11A PE=1 SV=3
634	TRUE	Q14165|MLEC_HUMAN	73.92974	2			734.6034	240.33972					2			3	1						32233.865	Malectin OS=Homo sapiens OX=9606 GN=MLEC PE=1 SV=1
8	FALSE	P17661|DESM_HUMAN	139.37975	4	40578.414	53078.58	66123.11	234828.62	10361.625	31088.885	22729.85	81779.6	4	8	8	8	17	3	5	4	10	Deamidation (NQ)	53535.785	Desmin OS=Homo sapiens OX=9606 GN=DES PE=1 SV=3
175	TRUE	Q12866|MERTK_HUMAN	245.61154	12	5340.537	18520.195	4773.397	2350.4822					11	18	16	16	17			1	1	Oxidation (M); Deamidation (NQ)	110249.14	Tyrosine-protein kinase Mer OS=Homo sapiens OX=9606 GN=MERTK PE=1 SV=2
118	TRUE	Q86UE4|LYRIC_HUMAN	275.7975	16	3643.2466	4652.9175	16456.326	24137.664		132.39787	1661.4683	2311.9219	16	19	14	30	27		4	7	10	Deamidation (NQ)	63836.98	Protein LYRIC OS=Homo sapiens OX=9606 GN=MTDH PE=1 SV=2
327	TRUE	Q658P3|STEA3_HUMAN	205.86124	7	4699.229	4117.309	7609.9746	6427.6196				645.4332	7	11	7	9	6				1	Carbamidomethylation	54600.64	Metalloreductase STEAP3 OS=Homo sapiens OX=9606 GN=STEAP3 PE=1 SV=2
584	TRUE	O00220|TR10A_HUMAN	101.04984	3	2636.4993	237.48927	1325.6418	1785.587					3	2	2	4	2					Oxidation (M)	50089.008	Tumor necrosis factor receptor superfamily member 10A OS=Homo sapiens OX=9606 GN=TNFRSF10A PE=1 SV=3
81	TRUE	P25705|ATPA_HUMAN	320.6191	19	93257.9	84779.04	41238.36	61488.016	53598.047	78957.41	62498.547	89746.96	19	40	44	32	31	24	47	35	42	Oxidation (M); Deamidation (NQ)	59750.625	ATP synthase subunit alpha, mitochondrial OS=Homo sapiens OX=9606 GN=ATP5F1A PE=1 SV=1
433	TRUE	Q9Y3Z3|SAMH1_HUMAN	130.76671	5	1347.7417	633.23865				91.20691	400.1114	731.8276	5	7	3		1	1	1	4	3	Oxidation (M)	72200.5	Deoxynucleoside triphosphate triphosphohydrolase SAMHD1 OS=Homo sapiens OX=9606 GN=SAMHD1 PE=1 SV=2
65	TRUE	P05141|ADT2_HUMAN	292.61682	24	137272.38	174011.48	128652.71	142577.61	100403.89	133531.66	149233.4	125112.97	11	56	67	50	61	52	47	58	55	Carbamidomethylation; Oxidation (M); Deamidation (NQ)	32852.227	ADP/ATP translocase 2 OS=Homo sapiens OX=9606 GN=SLC25A5 PE=1 SV=7
79	TRUE	P0DMV9|HS71B_HUMAN	279.48413	22	4471.3203	6222.774	3224.942	3599.3157	2179.587	2704.6414	6927.7676	4444.4614	6	23	25	17	17	14	18	26	25	Oxidation (M); Deamidation (NQ)	70052.23	Heat shock 70 kDa protein 1B OS=Homo sapiens OX=9606 GN=HSPA1B PE=1 SV=1
265	TRUE	P28290|ITPI2_HUMAN	160.26836	8	1525.9373	1676.3673	181.687	2867.2947			1008.28284	2531.9622	8	6	8	4	7		2	4	7	Deamidation (NQ); Oxidation (M)	138385.88	Protein ITPRID2 OS=Homo sapiens OX=9606 GN=ITPRID2 PE=1 SV=3
31	TRUE	P60709|ACTB_HUMAN	380.06818	31	673495	670094.7	862496.3	968872.3	350799.84	439422.5	639177	814706.06	31	126	140	161	181	113	121	138	142	Carbamidomethylation; Oxidation (M); Deamidation (NQ)	41736.73	Actin, cytoplasmic 1 OS=Homo sapiens OX=9606 GN=ACTB PE=1 SV=1
43	TRUE	P14923|PLAK_HUMAN	353.5403	31	121958.93	92825.23	89823.45	78315.02	21670.254	29208.84	52528.785	38913.594	27	73	73	73	62	39	43	50	50	Oxidation (M); Carbamidomethylation; Deamidation (NQ)	81744.74	Junction plakoglobin OS=Homo sapiens OX=9606 GN=JUP PE=1 SV=3
594	TRUE	Q6PJF5|RHDF2_HUMAN	62.277245	2	402.92514								2	1	1	1							96686.14	Inactive rhomboid protein 2 OS=Homo sapiens OX=9606 GN=RHBDF2 PE=1 SV=2
291	TRUE	Q01844|EWS_HUMAN	191.76363	5	45683.96	43517.66	24511.713	28413.496	13637.796	20648.744	51867.49	70687.22	5	13	11	6	9	5	8	20	21	Oxidation (M); Deamidation (NQ)	68478.234	RNA-binding protein EWS OS=Homo sapiens OX=9606 GN=EWSR1 PE=1 SV=1
590	TRUE	Q9BWU0|NADAP_HUMAN	94.788086	3							192.5068	581.454	3	1	1		1			2	3		88814.125	Kanadaptin OS=Homo sapiens OX=9606 GN=SLC4A1AP PE=1 SV=1
389	TRUE	P15311|EZRI_HUMAN	142.70831	6							1757.4092	621.448	6							6	5	Oxidation (M)	69412.805	Ezrin OS=Homo sapiens OX=9606 GN=EZR PE=1 SV=4
424	TRUE	Q99653|CHP1_HUMAN	158.43422	5			1418.2802	3182.309					5			2	6						22456.184	Calcineurin B homologous protein 1 OS=Homo sapiens OX=9606 GN=CHP1 PE=1 SV=3
103	TRUE	P05067|A4_HUMAN	265.07916	16	13689.906	11724.291	21680.281	20928.047	1424.7073	3364.4243	5064.3774	5908.116	15	17	16	23	20	4	6	9	8	Oxidation (M); Deamidation (NQ)	86943.24	Amyloid-beta precursor protein OS=Homo sapiens OX=9606 GN=APP PE=1 SV=3
70	TRUE	P11717|MPRI_HUMAN	307.6744	25	23243.254	20974.592	28937.275	21833.691	811.22217	611.6922		1396.1967	25	34	33	30	33	3	2	3	3	Oxidation (M); Deamidation (NQ)	274374.8	Cation-independent mannose-6-phosphate receptor OS=Homo sapiens OX=9606 GN=IGF2R PE=1 SV=3
150	TRUE	Q14118|DAG1_HUMAN	232.11523	13	24593.666	20245.48	18403.506	16944.996	220.69727	398.28714	623.1319	867.1644	13	19	20	14	13	3	3	2	2	Oxidation (M)	97441.484	Dystroglycan OS=Homo sapiens OX=9606 GN=DAG1 PE=1 SV=2
136	TRUE	P13010|XRCC5_HUMAN	245.18182	16	4866.788	4467.71	10012.794	7314.763	448.56055	807.2842	5776.09	6662.454	16	9	13	13	20	6	7	12	15	Oxidation (M); Deamidation (NQ)	82704.54	X-ray repair cross-complementing protein 5 OS=Homo sapiens OX=9606 GN=XRCC5 PE=1 SV=3
397	TRUE	P54289|CA2D1_HUMAN	153.1223	5	976.1769	677.7152	279.84326						5	4	3	1						Oxidation (M)	124568.03	Voltage-dependent calcium channel subunit alpha-2/delta-1 OS=Homo sapiens OX=9606 GN=CACNA2D1 PE=1 SV=3
164	TRUE	P20340|RAB6A_HUMAN	210.96584	11	3963.8325	9481.418	162936.94	172348.83	1605.4117	2338.7864	4741.616	1987.0725	10	11	18	31	30	10	10	10	12	Oxidation (M); Acetylation (N-term)	23592.775	Ras-related protein Rab-6A OS=Homo sapiens OX=9606 GN=RAB6A PE=1 SV=3
606	TRUE	P48060|GLIP1_HUMAN	71.413864	2									2	1	1	1	1					Oxidation (M)	30365.889	Glioma pathogenesis-related protein 1 OS=Homo sapiens OX=9606 GN=GLIPR1 PE=1 SV=3
347	TRUE	P61006|RAB8A_HUMAN	191.96806	7	2395.0674	1952.9042	6016.242	5782.8	666.3214	907.76636	1273.2832	1700.7576	2	14	17	17	21	13	10	11	14		23668.2	Ras-related protein Rab-8A OS=Homo sapiens OX=9606 GN=RAB8A PE=1 SV=1
697	TRUE	P36021|MOT8_HUMAN	92.41066	2	1692.1921		207.1554						2	5	5	2							59511.406	Monocarboxylate transporter 8 OS=Homo sapiens OX=9606 GN=SLC16A2 PE=1 SV=2
508	TRUE	Q9Y639|NPTN_HUMAN	98.189896	3	1078.4082	620.217	648.23083	533.54785					3	2	5	3	5					Oxidation (M)	44387.18	Neuroplastin OS=Homo sapiens OX=9606 GN=NPTN PE=1 SV=2
434	TRUE	O95208|EPN2_HUMAN	169.71544	5	1087.7666	1252.8859	5747.8203	3777.9932			368.14557	786.24316	5	3	6	6	6		2	2	3		68481.62	Epsin-2 OS=Homo sapiens OX=9606 GN=EPN2 PE=1 SV=3
261	TRUE	O43155|FLRT2_HUMAN	181.6129	8	5596.1436	5367.5757	3406.0742	3350.7212				310.41907	8	6	9	7	8				2	Oxidation (M); Deamidation (NQ)	74048.8	Leucine-rich repeat transmembrane protein FLRT2 OS=Homo sapiens OX=9606 GN=FLRT2 PE=1 SV=1
630	TRUE	Q13325|IFIT5_HUMAN	77.93013	2									2					1	1		1		55846.746	Interferon-induced protein with tetratricopeptide repeats 5 OS=Homo sapiens OX=9606 GN=IFIT5 PE=1 SV=1
313	TRUE	O75487|GPC4_HUMAN	168.5945	5	438.28546	150.20326							4	4	7	3	4					Oxidation (M)	62412.098	Glypican-4 OS=Homo sapiens OX=9606 GN=GPC4 PE=1 SV=4
582	TRUE	O00186|STXB3_HUMAN	124.34515	3	164.77875		415.74664	362.58316					3	1	1	2	3					Oxidation (M)	67764.27	Syntaxin-binding protein 3 OS=Homo sapiens OX=9606 GN=STXBP3 PE=1 SV=2
459	TRUE	Q9UNN8|EPCR_HUMAN	154.31393	4	8187.1562	4668.029	3483.6055	2290.22					4	5	7	6	4					Carbamidomethylation	26671.434	Endothelial protein C receptor OS=Homo sapiens OX=9606 GN=PROCR PE=1 SV=1
257	TRUE	O15427|MOT4_HUMAN	184.01088	8	26919.455	28758.004	9132.655	9740.237	1266.7507	2401.2505	839.79736	2430.2263	8	15	13	10	9	3	5	1	8	Deamidation (NQ); Oxidation (M)	49469.38	Monocarboxylate transporter 4 OS=Homo sapiens OX=9606 GN=SLC16A3 PE=1 SV=1
580	TRUE	P61764|STXB1_HUMAN	97.602234	3	229.2157	161.93562	1081.2732	413.05408			138.13254	394.082	3	3	2	4	1	1	1	2	3	Carbamidomethylation	67568.71	Syntaxin-binding protein 1 OS=Homo sapiens OX=9606 GN=STXBP1 PE=1 SV=1
377	TRUE	Q9Y5G3|PCDGD_HUMAN	158.50305	6	294.8937	338.9585		149.47859					2	4	5	9	5		1	3	2	Oxidation (M)	100359.51	Protocadherin gamma-B1 OS=Homo sapiens OX=9606 GN=PCDHGB1 PE=2 SV=1
181	TRUE	P84077|ARF1_HUMAN	209.84123	8	15955.77	13261.938	12551.297	7642.8857	8454.424	12803.445	10331.204	11332.87	5	15	16	14	11	15	19	18	15	Oxidation (M)	20696.764	ADP-ribosylation factor 1 OS=Homo sapiens OX=9606 GN=ARF1 PE=1 SV=2
565	TRUE	Q04771|ACVR1_HUMAN	98.4624	3	2055.447	1876.2024	934.25024	1298.2634			293.01135	359.10962	3	3	4	1	2			1	2		57152.848	Activin receptor type-1 OS=Homo sapiens OX=9606 GN=ACVR1 PE=1 SV=1
693	TRUE	Q15691|MARE1_HUMAN	102.94917	2							423.61624	484.43817	2							8	3	Carbamidomethylation	29999.076	Microtubule-associated protein RP/EB family member 1 OS=Homo sapiens OX=9606 GN=MAPRE1 PE=1 SV=3
422	FALSE	P06239|LCK_HUMAN	73.0148	2	1839.0594	1214.6835	495.51797	1159.0266	213.85309	595.51825	830.9654	350.8543	2	1	1	1	1	2	3	1	1		58000.605	Tyrosine-protein kinase Lck OS=Homo sapiens OX=9606 GN=LCK PE=1 SV=6
598	TRUE	Q86SJ2|AMGO2_HUMAN	97.79361	2	244.82826	358.8742							2	2	2								57933.89	Amphoterin-induced protein 2 OS=Homo sapiens OX=9606 GN=AMIGO2 PE=1 SV=1
155	TRUE	Q8NC51|PAIRB_HUMAN	252.63551	12	6383.9473	5266.2656	2730.642	2311.948	325.52182	1300.0391	4224.2183	7628.2617	12	18	19	14	12	6	8	17	20	Oxidation (M)	44965.383	Plasminogen activator inhibitor 1 RNA-binding protein OS=Homo sapiens OX=9606 GN=SERBP1 PE=1 SV=2
691	TRUE	O75251|NDUS7_HUMAN	72.4161	2	971.21405	650.8235	663.3851	457.64203		226.6737		605.12726	2	2	1	1	2		1		2	Oxidation (M)	23563.504	NADH dehydrogenase [ubiquinone] iron-sulfur protein 7, mitochondrial OS=Homo sapiens OX=9606 GN=NDUFS7 PE=1 SV=3
157	TRUE	P20020|AT2B1_HUMAN	231.83347	12		102.7776	921.5067	2434.4263					4	9	8	17	15		4	6	3	Oxidation (M)	134684.77	Plasma membrane calcium-transporting ATPase 1 OS=Homo sapiens OX=9606 GN=ATP2B1 PE=1 SV=4
7	TRUE	Q8IVF2|AHNK2_HUMAN	437.1164	98	95448.15	157444.56	136907.83	84563.86	42604.61	55378.902	88762.86	93237.61	98	131	133	104	104	74	69	87	124	Oxidation (M); Deamidation (NQ); Acetylation (N-term); Carbamidomethylation	616629.3	Protein AHNAK2 OS=Homo sapiens OX=9606 GN=AHNAK2 PE=1 SV=2
550	TRUE	Q9UHQ9|NB5R1_HUMAN	126.14693	3			1106.408	1509.177					3	1		4	5		1			Oxidation (M)	34094.84	NADH-cytochrome b5 reductase 1 OS=Homo sapiens OX=9606 GN=CYB5R1 PE=1 SV=1
448	TRUE	Q13433|S39A6_HUMAN	109.30336	4	1312.8052	2321.8481	375.30054	346.43698		119.89781			4	4	3	2	1	1	4	1			85046.79	Zinc transporter ZIP6 OS=Homo sapiens OX=9606 GN=SLC39A6 PE=1 SV=3
301	TRUE	Q9UJZ1|STML2_HUMAN	202.73831	6	3091.81	1704.9298	3000.1675	4667.2114	1119.7952	2265.159	1122.6504	1645.6924	6	7	6	9	7	6	6	7	4	Oxidation (M); Deamidation (NQ)	38534.062	Stomatin-like protein 2, mitochondrial OS=Homo sapiens OX=9606 GN=STOML2 PE=1 SV=1
300	TRUE	Q92930|RAB8B_HUMAN	192.62825	8	109.10399		2290.353	498.5143					3	11	15	19	21	9	8	9	11	Oxidation (M)	23584.09	Ras-related protein Rab-8B OS=Homo sapiens OX=9606 GN=RAB8B PE=1 SV=2
74	TRUE	P29323|EPHB2_HUMAN	312.14435	22	20654.156	25755.83	15595.0205	9663.375	604.35095	2168.5815	1626.7026	2232.5256	18	35	42	31	21	8	9	11	15	Oxidation (M); Carbamidomethylation; Deamidation (NQ)	117492.664	Ephrin type-B receptor 2 OS=Homo sapiens OX=9606 GN=EPHB2 PE=1 SV=5
36	TRUE	P53396|ACLY_HUMAN	364.39328	34	55203.69	51743.152	10952.727	8718.028	5052.3423	16593.723	65555.58	72561.27	34	64	63	22	23	25	41	69	74	Oxidation (M); Deamidation (NQ); Carbamidomethylation	120839.22	ATP-citrate synthase OS=Homo sapiens OX=9606 GN=ACLY PE=1 SV=3
97	TRUE	P43490|NAMPT_HUMAN	275.3192	17	18447.965	19512.012	11405.696	9609.127	6899.148	13035.123	10785.2705	15816.356	17	27	24	18	16	16	24	19	19	Oxidation (M); Deamidation (NQ)	55521.156	Nicotinamide phosphoribosyltransferase OS=Homo sapiens OX=9606 GN=NAMPT PE=1 SV=1
367	TRUE	Q86VI3|IQGA3_HUMAN	123.04325	5	85.555786							542.30505	3	5	3		2			1	5	Oxidation (M)	184698.81	Ras GTPase-activating-like protein IQGAP3 OS=Homo sapiens OX=9606 GN=IQGAP3 PE=1 SV=2
318	TRUE	Q9Y5X1|SNX9_HUMAN	195.68224	7	2044.2197	2082.0027					2592.9023	3001.872	7	4	9					11	9		66591.65	Sorting nexin-9 OS=Homo sapiens OX=9606 GN=SNX9 PE=1 SV=1
617	TRUE	Q9BXS5|AP1M1_HUMAN	70.42187	2							197.13461		2							1	1		48586.895	AP-1 complex subunit mu-1 OS=Homo sapiens OX=9606 GN=AP1M1 PE=1 SV=3
440	TRUE	P39656|OST48_HUMAN	151.53572	5			2113.0547	1364.8285					5	1	1	7	3						50800.83	Dolichyl-diphosphooligosaccharide--protein glycosyltransferase 48 kDa subunit OS=Homo sapiens OX=9606 GN=DDOST PE=1 SV=4
465	TRUE	P01857|IGHG1_HUMAN	137.17871	4	2905.7021	305.54773							4	3	2								36105.91	Immunoglobulin heavy constant gamma 1 OS=Homo sapiens OX=9606 GN=IGHG1 PE=1 SV=1
25	FALSE	P13637|AT1A3_HUMAN	274.5905	15	34465.094	25112.314	53213.723	258870.53	9960.59	11951.237	173076.45	13418.941	7	31	30	41	38	11	8	13	16	Oxidation (M); Deamidation (NQ); Carbamidomethylation	111748.54	Sodium/potassium-transporting ATPase subunit alpha-3 OS=Homo sapiens OX=9606 GN=ATP1A3 PE=1 SV=3
431	TRUE	Q9Y5Y0|FLVC1_HUMAN	183.73506	5	1776.4193	1832.3019	2466.5793	2050.3354					5	6	7	3	5						59862.887	Feline leukemia virus subgroup C receptor-related protein 1 OS=Homo sapiens OX=9606 GN=FLVCR1 PE=1 SV=1
311	FALSE	A6NIZ1|RP1BL_HUMAN	147.70381	6									2	2	2	8	6		1	1	1	Carbamidomethylation; Oxidation (M)	20924.86	Ras-related protein Rap-1b-like protein OS=Homo sapiens OX=9606 PE=2 SV=1
549	TRUE	P31431|SDC4_HUMAN	106.47679	3	1166.378	790.057	430.76172	101.85766					3	4	4	3	1						21641.555	Syndecan-4 OS=Homo sapiens OX=9606 GN=SDC4 PE=1 SV=2
4	TRUE	Q9NZM1|MYOF_HUMAN	468.72696	110	247355.94	260310.64	443742.47	398947.94	71371.09	109844.01	190830.19	253283.95	110	180	205	256	249	115	137	159	176	Carbamidomethylation; Deamidation (NQ); Oxidation (M)	234708.72	Myoferlin OS=Homo sapiens OX=9606 GN=MYOF PE=1 SV=1
483	TRUE	Q9HCP0|KC1G1_HUMAN	100.82371	4	387.7849	150.005							3	3	3	2	1					Oxidation (M)	48511.324	Casein kinase I isoform gamma-1 OS=Homo sapiens OX=9606 GN=CSNK1G1 PE=1 SV=1
497	TRUE	P50479|PDLI4_HUMAN	109.45422	4	1588.9075	1213.3242					1245.253	1920.5762	4	4	7					5	6		35397.996	PDZ and LIM domain protein 4 OS=Homo sapiens OX=9606 GN=PDLIM4 PE=1 SV=2
493	TRUE	Q7KYR7|BT2A1_HUMAN	159.21783	4	7236.577	5074.0513	3753.514	2323.232	229.13528	303.46527	396.31387	667.20807	4	5	7	8	3	3	1	1	2		59632.56	Butyrophilin subfamily 2 member A1 OS=Homo sapiens OX=9606 GN=BTN2A1 PE=1 SV=3
700	TRUE	Q8NFZ4|NLGN2_HUMAN	76.89525	2									2		4	1							90819.96	Neuroligin-2 OS=Homo sapiens OX=9606 GN=NLGN2 PE=1 SV=1
561	TRUE	P49757|NUMB_HUMAN	112.13889	3	560.7511	824.12305					214.15727	333.34296	3	6	9	2	1			2	4	Oxidation (M)	70803.8	Protein numb homolog OS=Homo sapiens OX=9606 GN=NUMB PE=1 SV=2
247	TRUE	P84085|ARF5_HUMAN	183.82155	6	3500.1255	4395.873	4254.783	1792.1404	1620.9158	3126.8616	3520.3335	4635.2935	3	12	13	12	7	10	11	12	9	Oxidation (M)	20529.65	ADP-ribosylation factor 5 OS=Homo sapiens OX=9606 GN=ARF5 PE=1 SV=2
375	TRUE	O43795|MYO1B_HUMAN	138.80319	5	125650.36	106703.664	112935.875	110386.305	77799.66	105355.69	101262.75	103552.44	4	10	5	11	11	4	8	7	10	Deamidation (NQ); Oxidation (M)	131985.03	Unconventional myosin-Ib OS=Homo sapiens OX=9606 GN=MYO1B PE=1 SV=3
712	TRUE	Q9H1C7|CYTM1_HUMAN	81.26088	2	2849.3127	1907.5668	3132.1968	2540.46				3246.7112	2	3	4	2	2			3	2		10631.036	Cysteine-rich and transmembrane domain-containing protein 1 OS=Homo sapiens OX=9606 GN=CYSTM1 PE=1 SV=1
422	FALSE	P12931|SRC_HUMAN	74.26513	2	2316.4329	1214.6835	495.51797	1159.0266	213.85309	595.51825	830.9654	350.8543	2	2	1	1	1	1	3	1	1		59834.758	Proto-oncogene tyrosine-protein kinase Src OS=Homo sapiens OX=9606 GN=SRC PE=1 SV=3
585	TRUE	Q9H9L4|KANL2_HUMAN	83.07579	3		264.63748							3		2						1		55042.4	KAT8 regulatory NSL complex subunit 2 OS=Homo sapiens OX=9606 GN=KANSL2 PE=1 SV=3
601	TRUE	Q9UP95|S12A4_HUMAN	116.31202	2	740.42847	312.0785	1214.4783	730.9353			208.2349	338.68127	2	2	1	3	3			2	2		120649.88	Solute carrier family 12 member 4 OS=Homo sapiens OX=9606 GN=SLC12A4 PE=1 SV=2
479	TRUE	Q12965|MYO1E_HUMAN	147.85847	4	761.91736	569.75354	725.5267	200.64304				1349.7357	4	3	3	2	1			1	5		127061.89	Unconventional myosin-Ie OS=Homo sapiens OX=9606 GN=MYO1E PE=1 SV=2
154	TRUE	Q00325|MPCP_HUMAN	196.18391	8	10814.73	9348.48	69891.984	73721.56	2502.71	5243.606	6726.112	9782.84	8	9	8	24	26	7	6	4	9	Deamidation (NQ); Oxidation (M)	40094.86	Phosphate carrier protein, mitochondrial OS=Homo sapiens OX=9606 GN=SLC25A3 PE=1 SV=2
642	TRUE	Q9UBI6|GBG12_HUMAN	92.1758	2	375.13046		2192.3052	2212.569					2	1		3	1					Oxidation (M); Carbamidomethylation	8006.2163	Guanine nucleotide-binding protein G(I)/G(S)/G(O) subunit gamma-12 OS=Homo sapiens OX=9606 GN=GNG12 PE=1 SV=3
633	TRUE	P07384|CAN1_HUMAN	74.265	2	226.35402	288.05365					433.3021	774.09515	2	1	1					1	2		81890.05	Calpain-1 catalytic subunit OS=Homo sapiens OX=9606 GN=CAPN1 PE=1 SV=1
162	TRUE	Q15046|SYK_HUMAN	229.9731	13	2191.5566	1696.2423	1964.4932	2618.7717	309.49112	597.7833	4366.905	3231.3672	13	8	4	5	6	4	3	17	10	Oxidation (M); Deamidation (NQ)	68048.06	Lysine--tRNA ligase OS=Homo sapiens OX=9606 GN=KARS1 PE=1 SV=3
223	TRUE	P55196|AFAD_HUMAN	207.9052	10	1296.7319	2138.9924	672.2512	1237.8484	159.44907	243.80501	2593.429	3331.0154	10	5	7	4	4	1	1	9	8	Oxidation (M)	206804.22	Afadin OS=Homo sapiens OX=9606 GN=AFDN PE=1 SV=3
287	TRUE	P09543|CN37_HUMAN	191.73445	7	3338.4155	3610.828	3877.3362	1795.5441	868.03864		1060.5353	3465.189	7	6	7	5	4	3		6	5	Deamidation (NQ)	47578.625	2',3'-cyclic-nucleotide 3'-phosphodiesterase OS=Homo sapiens OX=9606 GN=CNP PE=1 SV=2
260	FALSE	Q8TDB8|GTR14_HUMAN	167.04543	4	12536.496	11612.123	5348.7505	3838.7969					4	13	8	5	6				1	Deamidation (NQ); Oxidation (M)	56320.11	Solute carrier family 2, facilitated glucose transporter member 14 OS=Homo sapiens OX=9606 GN=SLC2A14 PE=1 SV=1
650	TRUE	Q9Y3S1|WNK2_HUMAN	72.26369	2		780.2494					240.40932		2		2					1			242676.1	Serine/threonine-protein kinase WNK2 OS=Homo sapiens OX=9606 GN=WNK2 PE=1 SV=4
494	TRUE	Q12929|EPS8_HUMAN	101.40686	4		127.28582						471.7669	4		1						4	Oxidation (M)	91881.516	Epidermal growth factor receptor kinase substrate 8 OS=Homo sapiens OX=9606 GN=EPS8 PE=1 SV=1
641	TRUE	Q9H490|PIGU_HUMAN	109.55167	2	351.85208	234.22604	771.0199						2	4	3	3	1						50051.812	Phosphatidylinositol glycan anchor biosynthesis class U protein OS=Homo sapiens OX=9606 GN=PIGU PE=1 SV=3
525	TRUE	Q07021|C1QBP_HUMAN	139.5572	3	2299.8413	2046.9767	5292.8833	4460.578	498.56592	819.6608	1246.2834	2884.7812	3	6	2	4	6	1	3	1	4		31362.236	Complement component 1 Q subcomponent-binding protein, mitochondrial OS=Homo sapiens OX=9606 GN=C1QBP PE=1 SV=1
212	TRUE	P61026|RAB10_HUMAN	238.81609	11	11777.712	12821.097	32691.459	32284.422	3497.9893	4108.2734	7807.2227	6221.5405	8	24	24	24	29	16	18	18	23		22540.928	Ras-related protein Rab-10 OS=Homo sapiens OX=9606 GN=RAB10 PE=1 SV=1
195	FALSE	P48751|B3A3_HUMAN	99.27543	2			379.96634	385.7					2	1	2	2	4						135790.92	Anion exchange protein 3 OS=Homo sapiens OX=9606 GN=SLC4A3 PE=1 SV=2
714	TRUE	Q96CP6|ASTRA_HUMAN	84.0435	2	633.1761	209.62628							2	2	1								80680.17	Protein Aster-A OS=Homo sapiens OX=9606 GN=GRAMD1A PE=1 SV=2
361	TRUE	Q9Y6G9|DC1L1_HUMAN	146.10823	5	1865.634	1353.2622	419.72934	125.13703		143.77405	2747.1257	2956.4702	5	4	3	1	1		2	7	5	Deamidation (NQ)	56579.137	Cytoplasmic dynein 1 light intermediate chain 1 OS=Homo sapiens OX=9606 GN=DYNC1LI1 PE=1 SV=3
253	TRUE	P51151|RAB9A_HUMAN	201.48705	8	3765.3777	3399.6465	6386.6953	5247.452		1204.1296	1737.7108	2092.1145	6	6	4	9	7	3	5	6	5	Deamidation (NQ)	22837.578	Ras-related protein Rab-9A OS=Homo sapiens OX=9606 GN=RAB9A PE=1 SV=1
703	TRUE	Q9H223|EHD4_HUMAN	65.2547	2	992.4611								2	1	1					1		Oxidation (M)	61175.125	EH domain-containing protein 4 OS=Homo sapiens OX=9606 GN=EHD4 PE=1 SV=1
250	TRUE	Q14BN4|SLMAP_HUMAN	154.2218	9	1600.3187	1481.1091	1464.8085	1161.3357	261.45862	613.8368	1107.8813	932.0864	9	4	8	5	4	2	4	3	4	Oxidation (M)	95198.3	Sarcolemmal membrane-associated protein OS=Homo sapiens OX=9606 GN=SLMAP PE=1 SV=1
55	TRUE	P27824|CALX_HUMAN	337.62415	33	28359.578	28844.678	262813.7	280087.94	1978.8712	4677.2534	12994.899	12780.835	33	28	36	88	101	3	9	33	13	Deamidation (NQ); Oxidation (M)	67568.3	Calnexin OS=Homo sapiens OX=9606 GN=CANX PE=1 SV=2
252	TRUE	P29992|GNA11_HUMAN	179.9204	8			5827.185	5593.732					7		1	12	8				2	Oxidation (M)	42123.33	Guanine nucleotide-binding protein subunit alpha-11 OS=Homo sapiens OX=9606 GN=GNA11 PE=1 SV=2
133	TRUE	Q00341|VIGLN_HUMAN	214.58107	14	1839.9135	1390.9052					3984.9011	4515.762	14	6	7					14	14	Oxidation (M)	141455.64	Vigilin OS=Homo sapiens OX=9606 GN=HDLBP PE=1 SV=2
695	TRUE	O15111|IKKA_HUMAN	86.62983	2	1149.3567							83.52165	2	3			1		1	1	2		84639.58	Inhibitor of nuclear factor kappa-B kinase subunit alpha OS=Homo sapiens OX=9606 GN=CHUK PE=1 SV=2
664	TRUE	P17655|CAN2_HUMAN	62.94496	2									2							1	1		79995.35	Calpain-2 catalytic subunit OS=Homo sapiens OX=9606 GN=CAPN2 PE=1 SV=6
532	TRUE	P04156|PRIO_HUMAN	114.15599	3	2113.8035	699.4841	915.57794	758.0913			425.30292	605.9101	3	4	3	2	2	2	4	2	2		27661.162	Major prion protein OS=Homo sapiens OX=9606 GN=PRNP PE=1 SV=1
57	TRUE	O75691|UTP20_HUMAN	290.74295	33	17905.979	12346.218	2174.979	5559.8296	1857.0361	2471.6519	7602.0615	12695.828	33	40	39	12	22	11	11	23	36	Oxidation (M); Deamidation (NQ)	318385.4	Small subunit processome component 20 homolog OS=Homo sapiens OX=9606 GN=UTP20 PE=1 SV=3
292	TRUE	P84095|RHOG_HUMAN	182.82884	5	1029.3818	3952.4	4230.5186	3910.185	811.63934	1160.0157	2039.7881	1697.2133	5	11	8	4	10	5	7	10	3	Deamidation (NQ); Carbamidomethylation	21308.5	Rho-related GTP-binding protein RhoG OS=Homo sapiens OX=9606 GN=RHOG PE=1 SV=1
506	TRUE	Q9H9J2|RM44_HUMAN	118.882996	3	496.3202	87.96051	174.9056			145.12967	249.1194	461.58307	3	4	2	1	1	1	2	2	2		37535.37	39S ribosomal protein L44, mitochondrial OS=Homo sapiens OX=9606 GN=MRPL44 PE=1 SV=1
307	TRUE	P05026|AT1B1_HUMAN	165.52687	6	11262.861	9940.542	8977.972	3628.3125					6	10	10	9	7					Deamidation (NQ); Carbamidomethylation	35061.3	Sodium/potassium-transporting ATPase subunit beta-1 OS=Homo sapiens OX=9606 GN=ATP1B1 PE=1 SV=1
507	TRUE	P07602|SAP_HUMAN	112.341934	3	5079.1274	4475.353		454.7921					3	3	4		1				1	Oxidation (M)	58112.637	Prosaposin OS=Homo sapiens OX=9606 GN=PSAP PE=1 SV=2
204	TRUE	P20339|RAB5A_HUMAN	181.52808	7	1679.2347	2013.222	4955.501	6551.9956	463.84045	1127.6681	746.5473	2197.3267	4	6	10	18	20	6	6	4	8	Deamidation (NQ); Oxidation (M)	23658.678	Ras-related protein Rab-5A OS=Homo sapiens OX=9606 GN=RAB5A PE=1 SV=2
337	TRUE	Q9NPH3|IL1AP_HUMAN	175.54306	7	6117.4805	3917.245	3649.2383	1563.8323					7	9	9	9	2						65418.438	Interleukin-1 receptor accessory protein OS=Homo sapiens OX=9606 GN=IL1RAP PE=1 SV=2
146	TRUE	Q6NZI2|CAVN1_HUMAN	257.30524	12	39370.824	35926.457	40612.395	28246.303	7569.9795	12626.014	27461.762	37135.887	12	27	25	25	22	11	15	23	24	Oxidation (M); Deamidation (NQ)	43476.133	Caveolae-associated protein 1 OS=Homo sapiens OX=9606 GN=CAVIN1 PE=1 SV=1
308	TRUE	Q03135|CAV1_HUMAN	224.45088	8	45346.305	36110.133	48198.58	32440.03	3811.1602	7667.4897	28971.48	36847.492	8	19	15	20	18	6	11	20	18	Oxidation (M)	20471.615	Caveolin-1 OS=Homo sapiens OX=9606 GN=CAV1 PE=1 SV=4
365	TRUE	P17252|KPCA_HUMAN	144.0907	5	2796.4243	2000.5769	1533.7806	1473.4749	516.77924	673.588	1539.4922	2716.9282	5	6	4	4	3	3	4	3	6	Oxidation (M)	76749.92	Protein kinase C alpha type OS=Homo sapiens OX=9606 GN=PRKCA PE=1 SV=4
312	TRUE	P62987|RL40_HUMAN	195.25371	6	166724.55	159537.78	118344.57	111537.39	30530.092	47319.48	71351.72	86326.44	6	29	35	30	24	17	19	23	19	Deamidation (NQ)	14728.311	Ubiquitin-60S ribosomal protein L40 OS=Homo sapiens OX=9606 GN=UBA52 PE=1 SV=2
342	TRUE	Q8NBX0|SCPDL_HUMAN	183.65524	7			4423.302	1491.7866				74.575714	7			7	11				1	Oxidation (M)	47151.375	Saccharopine dehydrogenase-like oxidoreductase OS=Homo sapiens OX=9606 GN=SCCPDH PE=1 SV=1
4	FALSE	O75923|DYSF_HUMAN	137.14763	4	11156.317	8370.695	3859.2517	15640.618	2422.0662	4409.8096	1833.148	11412.743	4	6	7	6	4	4	3	7	5		237294.95	Dysferlin OS=Homo sapiens OX=9606 GN=DYSF PE=1 SV=1
38	FALSE	O60486|PLXC1_HUMAN	64.68349	2		213.61188		193.65352					2	2	2	1	1						175742.03	Plexin-C1 OS=Homo sapiens OX=9606 GN=PLXNC1 PE=1 SV=1
439	TRUE	P49755|TMEDA_HUMAN	146.60475	4	176.22012		3499.611	3933.9878					4	2	1	2	7					Deamidation (NQ)	24975.967	Transmembrane emp24 domain-containing protein 10 OS=Homo sapiens OX=9606 GN=TMED10 PE=1 SV=2
87	TRUE	O95425|SVIL_HUMAN	259.39432	23	3322.0132	5327.6187	160.19908	2158.3813	724.87054	63425.086	5013.74	8568.581	23	16	18	3	7	8	15	22	19	Oxidation (M); Deamidation (NQ)	247746.36	Supervillin OS=Homo sapiens OX=9606 GN=SVIL PE=1 SV=2
402	TRUE	Q14244|MAP7_HUMAN	125.851715	5	1655.4929	519.239	500.26654			170.17798	502.34146	820.3148	5	5	2	2		2	3	5	7	Acetylation (N-term)	84051.77	Ensconsin OS=Homo sapiens OX=9606 GN=MAP7 PE=1 SV=1
502	TRUE	P98172|EFNB1_HUMAN	111.73526	4	557.47504	549.35565							4	3	2								38006.586	Ephrin-B1 OS=Homo sapiens OX=9606 GN=EFNB1 PE=1 SV=1
596	TRUE	P0DP24|CALM2_HUMAN	70.866234	2				1532.3604					2			2	3						16837.582	Calmodulin-2 OS=Homo sapiens OX=9606 GN=CALM2 PE=1 SV=1
290	TRUE	Q9NP72|RAB18_HUMAN	192.6487	8	352.27164	7865.3506	6018.591	7577.773	1076.0312	763.03394	921.54675	2579.9946	7	6	11	8	10	4	7	6	9	Oxidation (M)	22977.07	Ras-related protein Rab-18 OS=Homo sapiens OX=9606 GN=RAB18 PE=1 SV=1
122	TRUE	P09601|HMOX1_HUMAN	231.46986	11	1681.9106	1321.7922	32481.783	32902.31				438.04413	11	4	5	23	27				1	Deamidation (NQ); Oxidation (M); Acetylation (N-term)	32818.605	Heme oxygenase 1 OS=Homo sapiens OX=9606 GN=HMOX1 PE=1 SV=1
78	TRUE	P06733|ENOA_HUMAN	285.84995	17	32599.914	36582.293	61782.656	26943.066	38198.53	12170.516	17106.23	15084.418	17	28	41	17	17	24	24	30	24	Deamidation (NQ); Oxidation (M)	47168.957	Alpha-enolase OS=Homo sapiens OX=9606 GN=ENO1 PE=1 SV=2
38	FALSE	Q9Y4D7|PLXD1_HUMAN	64.68349	2		213.61188		193.65352					2	2	2	1	1						212006.95	Plexin-D1 OS=Homo sapiens OX=9606 GN=PLXND1 PE=1 SV=3
27	TRUE	P11142|HSP7C_HUMAN	366.2303	37	172172.9	144194.89	83164.5	103259.86	60229.766	97850.13	180974.98	196089.75	25	91	82	56	68	69	72	96	91	Carbamidomethylation; Deamidation (NQ); Oxidation (M)	70898.086	Heat shock cognate 71 kDa protein OS=Homo sapiens OX=9606 GN=HSPA8 PE=1 SV=1
341	TRUE	Q96A65|EXOC4_HUMAN	172.77441	7	808.44385	611.2333					1197.4603	447.31555	7	7	3					2	4	Oxidation (M)	110498.055	Exocyst complex component 4 OS=Homo sapiens OX=9606 GN=EXOC4 PE=1 SV=1
276	TRUE	Q15286|RAB35_HUMAN	184.27505	7	1174.8374	3919.6382	3406.259	4422.9805	963.13464	1013.79285	956.42554	620.096	5	12	13	17	20	13	11	9	15	Oxidation (M)	23025.215	Ras-related protein Rab-35 OS=Homo sapiens OX=9606 GN=RAB35 PE=1 SV=1
404	TRUE	Q9C0B5|ZDHC5_HUMAN	178.25098	5	1669.5673	1985.0363							5	4	8	3	2					Oxidation (M)	77544.73	Palmitoyltransferase ZDHHC5 OS=Homo sapiens OX=9606 GN=ZDHHC5 PE=1 SV=2
569	TRUE	Q29983|MICA_HUMAN	96.62191	3	764.2356	651.7376	203.72563						3	2	2	1						Oxidation (M)	42915.4	MHC class I polypeptide-related sequence A OS=Homo sapiens OX=9606 GN=MICA PE=1 SV=1
267	TRUE	P51153|RAB13_HUMAN	165.98532	7	1605.7795	1119.2135	2038.2096	1427.262	135.70393	647.4275	467.4697	1585.5483	5	9	10	6	9	7	7	5	7	Oxidation (M); Deamidation (NQ)	22774.115	Ras-related protein Rab-13 OS=Homo sapiens OX=9606 GN=RAB13 PE=1 SV=1
373	TRUE	O95832|CLD1_HUMAN	148.22906	3	11820.775	8788.33	8548.222	5033.379					3	4	7	10	7				1	Carbamidomethylation; Deamidation (NQ); Oxidation (M)	22743.83	Claudin-1 OS=Homo sapiens OX=9606 GN=CLDN1 PE=1 SV=1
316	TRUE	Q9BTU6|P4K2A_HUMAN	155.56613	7			3076.9734	3994.4165				290.5316	7			8	9			1	2		54022.363	Phosphatidylinositol 4-kinase type 2-alpha OS=Homo sapiens OX=9606 GN=PI4K2A PE=1 SV=1
107	TRUE	P27816|MAP4_HUMAN	257.5009	19	6012.736	8587.641	2109.3008	1690.2506	3592.1792	2185.6501	11928.7705	15588.82	19	21	19	4	3	7	4	20	18	Oxidation (M)	121004.98	Microtubule-associated protein 4 OS=Homo sapiens OX=9606 GN=MAP4 PE=1 SV=3
539	TRUE	Q8NFJ5|RAI3_HUMAN	120.04552	3	3820.3975	3729.7065	2616.1516	2811.796	737.7484	1256.4119	2678.2246	5249.7383	3	6	5	6	4	3	3	3	4		40251.1	Retinoic acid-induced protein 3 OS=Homo sapiens OX=9606 GN=GPRC5A PE=1 SV=2
429	TRUE	Q86TC9|MYPN_HUMAN	140.92638	5	316.00977	242.66849					947.22534	1364.2102	5	4	2	1				8	4		145257.03	Myopalladin OS=Homo sapiens OX=9606 GN=MYPN PE=1 SV=2
387	FALSE	P15153|RAC2_HUMAN	131.18472	4	295.6921		2713.1152	3439.086					4	2		6	4				1	Acetylation (N-term); Deamidation (NQ); Carbamidomethylation	21428.8	Ras-related C3 botulinum toxin substrate 2 OS=Homo sapiens OX=9606 GN=RAC2 PE=1 SV=1
278	TRUE	P29966|MARCS_HUMAN	181.76895	7	458.72382	768.6238	625.72815	422.5461		80.60798		677.4448	7	5	7	13	6	3	5	3	8	Deamidation (NQ)	31554.656	Myristoylated alanine-rich C-kinase substrate OS=Homo sapiens OX=9606 GN=MARCKS PE=1 SV=4
685	TRUE	P16144|ITB4_HUMAN	97.077896	2	979.6447		61.56289						2	2	2	3							202167.14	Integrin beta-4 OS=Homo sapiens OX=9606 GN=ITGB4 PE=1 SV=5
93	TRUE	Q14247|SRC8_HUMAN	301.5944	20	11593.424	6712.21	4530.201	1687.1211	3486.813	2927.754	13027.866	20204.582	20	24	20	10	6	12	11	24	31	Carbamidomethylation; Oxidation (M); Deamidation (NQ)	61586.133	Src substrate cortactin OS=Homo sapiens OX=9606 GN=CTTN PE=1 SV=2
346	TRUE	O15439|MRP4_HUMAN	140.9242	7	889.8618	370.4994	7310.279	2038.9608					7	4	7	7	5					Oxidation (M)	149526.77	Multidrug resistance-associated protein 4 OS=Homo sapiens OX=9606 GN=ABCC4 PE=1 SV=3
71	TRUE	O60716|CTND1_HUMAN	302.3284	23	20508.465	16741.777	10433.239	10381.233	1419.395	1559.5913	17134.463	29679.35	23	24	29	18	17	10	9	26	40	Oxidation (M)	108170.02	Catenin delta-1 OS=Homo sapiens OX=9606 GN=CTNND1 PE=1 SV=1
651	TRUE	P54578|UBP14_HUMAN	58.731102	2							539.2981	784.66724	2	1						1	1	Oxidation (M)	56069.066	Ubiquitin carboxyl-terminal hydrolase 14 OS=Homo sapiens OX=9606 GN=USP14 PE=1 SV=3
171	TRUE	Q9UHR4|BI2L1_HUMAN	249.04451	13	14170.794	14096.04	6469.1504	2476.3867	2147.4268	1918.6542	8555.589	25544.037	13	14	19	12	5	8	6	12	16	Oxidation (M)	56882.64	Brain-specific angiogenesis inhibitor 1-associated protein 2-like protein 1 OS=Homo sapiens OX=9606 GN=BAIAP2L1 PE=1 SV=2
119	TRUE	Q96PD2|DCBD2_HUMAN	256.2035	15	53706.367	47306.89	32028.148	21919.617	1263.0719	4492.352	5640.2007	9588.937	15	33	35	32	21	9	15	13	15	Deamidation (NQ); Oxidation (M); Carbamidomethylation	85034.64	Discoidin, CUB and LCCL domain-containing protein 2 OS=Homo sapiens OX=9606 GN=DCBLD2 PE=1 SV=1
480	TRUE	Q9Y289|SC5A6_HUMAN	145.85185	4	7026.163	8101.584	2150.669	927.27124					4	9	8	4	1					Oxidation (M)	68641.94	Sodium-dependent multivitamin transporter OS=Homo sapiens OX=9606 GN=SLC5A6 PE=2 SV=2
319	TRUE	Q9UHE8|STEA1_HUMAN	159.45786	7	5020.828	4052.6917	2760.5112	1798.0708			553.41223	1889.2222	7	12	8	4	7			1	3	Oxidation (M)	39851.125	Metalloreductase STEAP1 OS=Homo sapiens OX=9606 GN=STEAP1 PE=1 SV=1
520	TRUE	Q9BX67|JAM3_HUMAN	123.54203	3	1488.5029	1341.5393	965.79285	856.71375					3	2	1	3	2						35019.945	Junctional adhesion molecule C OS=Homo sapiens OX=9606 GN=JAM3 PE=1 SV=1
131	TRUE	P63010|AP2B1_HUMAN	270.6619	18	716.0651	2072.483	7451.891	9764.121			1732.1447	1901.2769	18	5	6	19	22			14	8	Carbamidomethylation; Oxidation (M)	104552.56	AP-2 complex subunit beta OS=Homo sapiens OX=9606 GN=AP2B1 PE=1 SV=1
414	TRUE	O14672|ADA10_HUMAN	155.88078	5	5951.643	6016.324	2958.4604	1968.7582					5	10	5	10	6					Oxidation (M)	84142.12	Disintegrin and metalloproteinase domain-containing protein 10 OS=Homo sapiens OX=9606 GN=ADAM10 PE=1 SV=1
627	TRUE	Q96HI0|SENP5_HUMAN	119.33115	2	218.50021	511.6869		182.07478			323.93176	256.48737	2	8	2		4		1	3	2	Oxidation (M)	86693.03	Sentrin-specific protease 5 OS=Homo sapiens OX=9606 GN=SENP5 PE=1 SV=3
454	TRUE	Q9BY67|CADM1_HUMAN	129.57007	3	1929.7816	1625.7886	524.5929	1244.187					3	6	5	3	6					Deamidation (NQ)	48509.086	Cell adhesion molecule 1 OS=Homo sapiens OX=9606 GN=CADM1 PE=1 SV=2
558	TRUE	P09493|TPM1_HUMAN	97.62778	3	950.8582	780.7958				246.9125	2923.013	2133.017	3	1	1				1	6	4		32708.564	Tropomyosin alpha-1 chain OS=Homo sapiens OX=9606 GN=TPM1 PE=1 SV=2
305	TRUE	Q9ULF5|S39AA_HUMAN	162.09346	8	5845.595	3711.1182	3583.4216	3688.9116	212.69763	1190.6315	200.2828		8	10	7	4	8	4	9	4		Oxidation (M)	94131.9	Zinc transporter ZIP10 OS=Homo sapiens OX=9606 GN=SLC39A10 PE=1 SV=2
405	TRUE	P21926|CD9_HUMAN	140.87762	5	16518.492	19048.51	7655.591	8290.137					5	12	10	5	8						25416.053	CD9 antigen OS=Homo sapiens OX=9606 GN=CD9 PE=1 SV=4
467	TRUE	Q14574|DSC3_HUMAN	107.48401	3	423.58838	1001.31616	146.23712	353.84253			354.93253		3	2	5	5	1			1	1	Deamidation (NQ)	99968.984	Desmocollin-3 OS=Homo sapiens OX=9606 GN=DSC3 PE=1 SV=3
649	TRUE	P84022|SMAD3_HUMAN	110.90941	2	1074.6539	410.33487		292.83423			603.0226	1394.7157	2	2	1		1			2	1		48080.75	Mothers against decapentaplegic homolog 3 OS=Homo sapiens OX=9606 GN=SMAD3 PE=1 SV=1
564	TRUE	Q92859|NEO1_HUMAN	84.05408	3									3		1		1				1	Acetylation (N-term); Oxidation (M)	160016.55	Neogenin OS=Homo sapiens OX=9606 GN=NEO1 PE=1 SV=2
275	TRUE	Q02978|M2OM_HUMAN	195.67912	8	5141.121	4530.9956	5831.6094	4896.083	616.37366	2138.8896	3598.5496	5166.173	8	8	8	6	9	4	6	6	11	Oxidation (M)	34061.707	Mitochondrial 2-oxoglutarate/malate carrier protein OS=Homo sapiens OX=9606 GN=SLC25A11 PE=1 SV=3
604	TRUE	P40189|IL6RB_HUMAN	63.616135	2		706.6439							2		2								103536.59	Interleukin-6 receptor subunit beta OS=Homo sapiens OX=9606 GN=IL6ST PE=1 SV=2
67	TRUE	P07355|ANXA2_HUMAN	338.38498	27	67652.26	66322.945	90309.32	94604.5	16358.307	30697.516	80125.234	83790.25	27	41	49	41	53	24	30	56	45	Deamidation (NQ); Carbamidomethylation; Oxidation (M); Acetylation (N-term)	38604.035	Annexin A2 OS=Homo sapiens OX=9606 GN=ANXA2 PE=1 SV=2
492	TRUE	Q8IXI2|MIRO1_HUMAN	146.98454	4	700.6682	281.449	1447.4543	1458.5989			244.7706	299.08258	3	5	3	5	3	1	1	3	3		70784.21	Mitochondrial Rho GTPase 1 OS=Homo sapiens OX=9606 GN=RHOT1 PE=1 SV=2
182	TRUE	Q9Y2A7|NCKP1_HUMAN	196.15916	11	2032.8401	1770.4631		212.9939			2076.3123	3555.9128	11	8	6		1		1	8	12	Oxidation (M)	128789.984	Nck-associated protein 1 OS=Homo sapiens OX=9606 GN=NCKAP1 PE=1 SV=1
596	TRUE	P0DP25|CALM3_HUMAN	70.866234	2				1532.3604					2			2	3						16837.582	Calmodulin-3 OS=Homo sapiens OX=9606 GN=CALM3 PE=1 SV=1
629	TRUE	Q06787|FMR1_HUMAN	63.53609	2	3590.6353	3217.053	1659.2222	2122.8186	1038.6378	1709.0875	3806.4958	4772.4688	2	2	1	1	1	2	1	2	2		71174.47	Synaptic functional regulator FMR1 OS=Homo sapiens OX=9606 GN=FMR1 PE=1 SV=1
30	TRUE	P35579|MYH9_HUMAN	347.00592	42	4844.565	1568.704	9869.471	29954.148			2506.2134	9514.04	37	21	12	43	69			12	33	Carbamidomethylation; Deamidation (NQ); Oxidation (M)	226532.23	Myosin-9 OS=Homo sapiens OX=9606 GN=MYH9 PE=1 SV=4
41	TRUE	Q03001|DYST_HUMAN	299.91617	40	5610.5854	1342.8167				2200.0054	1476.1533	4389.2495	34	18	25	4	7	3	6	22	37	Oxidation (M); Acetylation (N-term); Deamidation (NQ)	860661.8	Dystonin OS=Homo sapiens OX=9606 GN=DST PE=1 SV=4
545	TRUE	O95171|SCEL_HUMAN	111.837006	3	510.32767	252.969					281.76358	959.76776	3	2	1				1	2	4		77551.73	Sciellin OS=Homo sapiens OX=9606 GN=SCEL PE=1 SV=2
510	TRUE	Q96T83|SL9A7_HUMAN	80.29568	3	229.54608		749.90015	914.50226				107.03472	3	1	2	2	2		1		1	Oxidation (M)	80130.97	Sodium/hydrogen exchanger 7 OS=Homo sapiens OX=9606 GN=SLC9A7 PE=1 SV=1
711	TRUE	P30626|SORCN_HUMAN	86.40846	2	343.21204						553.0994	1179.6063	2	1						1	4		21676.375	Sorcin OS=Homo sapiens OX=9606 GN=SRI PE=1 SV=1
333	TRUE	O96005|CLPT1_HUMAN	155.38878	4	63.408684		5956.727	8329.682					4	2	1	14	9				1	Deamidation (NQ); Oxidation (M)	76096.67	Cleft lip and palate transmembrane protein 1 OS=Homo sapiens OX=9606 GN=CLPTM1 PE=1 SV=1
285	TRUE	Q5ZPR3|CD276_HUMAN	216.08318	7	23147.39	18322.463	8223.691	6919.7173					7	18	20	13	10				2	Oxidation (M); Carbamidomethylation	57235.438	CD276 antigen OS=Homo sapiens OX=9606 GN=CD276 PE=1 SV=1
541	TRUE	P48634|PRC2A_HUMAN	83.34805	3		697.27673					636.272	723.6041	3	1	2					3	2		228863.19	Protein PRRC2A OS=Homo sapiens OX=9606 GN=PRRC2A PE=1 SV=3
386	TRUE	O00291|HIP1_HUMAN	146.92126	6	442.4919	124.728096	289.55118	1292.6661			56.927628	775.7476	5	4	1	5	4		1	1	3	Oxidation (M); Carbamidomethylation	116221.14	Huntingtin-interacting protein 1 OS=Homo sapiens OX=9606 GN=HIP1 PE=1 SV=5
587	TRUE	Q96KC8|DNJC1_HUMAN	96.129654	3			630.7425	659.8992					3			2	4						63882.87	DnaJ homolog subfamily C member 1 OS=Homo sapiens OX=9606 GN=DNAJC1 PE=1 SV=1
350	TRUE	Q6PCB8|EMB_HUMAN	154.35487	5	3068.9163	4824.0366	1840.2368	1984.8513					5	6	11	5	3					Deamidation (NQ)	36880.95	Embigin OS=Homo sapiens OX=9606 GN=EMB PE=1 SV=1
117	TRUE	Q07065|CKAP4_HUMAN	284.02008	18	4120.8804	2962.6362	15260.764	15554.824	450.23315	1281.4537	982.88025	1687.2461	18	18	15	22	28	5	8	6	9	Oxidation (M); Deamidation (NQ)	66022.46	Cytoskeleton-associated protein 4 OS=Homo sapiens OX=9606 GN=CKAP4 PE=1 SV=2
393	FALSE	O43861|ATP9B_HUMAN	80.02263	2	217.20525	368.48358	601.6062	389.274				11804.9	2	1	2	3	3			1	1	Oxidation (M)	129303.53	Probable phospholipid-transporting ATPase IIB OS=Homo sapiens OX=9606 GN=ATP9B PE=2 SV=4
216	TRUE	Q86YS7|C2CD5_HUMAN	190.1887	10	3545.9216	3005.346	1896.4401	829.9188	644.6561	2630.5352	3329.8691	5323.1885	10	14	11	6	5	5	15	12	11	Oxidation (M)	110447.01	C2 domain-containing protein 5 OS=Homo sapiens OX=9606 GN=C2CD5 PE=1 SV=1
403	TRUE	P20645|MPRD_HUMAN	178.25285	4	4836.7803	2414.5332	27526.02	16039.17			2638.2617	1664.7488	4	3	1	14	9			5	2	Oxidation (M); Deamidation (NQ); Carbamidomethylation	30993.27	Cation-dependent mannose-6-phosphate receptor OS=Homo sapiens OX=9606 GN=M6PR PE=1 SV=1
581	TRUE	Q96DA2|RB39B_HUMAN	119.707016	3			535.58276	912.29083					2	5	6	8	11	5	6	4	7		24622.133	Ras-related protein Rab-39B OS=Homo sapiens OX=9606 GN=RAB39B PE=1 SV=1
701	TRUE	Q99805|TM9S2_HUMAN	69.20758	2			159.67746	206.71866					2			2	1					Oxidation (M)	75775.664	Transmembrane 9 superfamily member 2 OS=Homo sapiens OX=9606 GN=TM9SF2 PE=1 SV=1
479	FALSE	O00160|MYO1F_HUMAN	131.79892	3	761.91736	569.75354	246.52505	200.64304				509.19257	3	3	3	1	1			1	4		124844.27	Unconventional myosin-If OS=Homo sapiens OX=9606 GN=MYO1F PE=1 SV=3
620	TRUE	P41440|S19A1_HUMAN	70.4782	2		1015.20557		276.72247					2	1	1		1		1				64868.312	Reduced folate transporter OS=Homo sapiens OX=9606 GN=SLC19A1 PE=1 SV=3
124	TRUE	P23634|AT2B4_HUMAN	272.09497	17	1055.8387	880.20087	6196.494	4563.6543	154.85208		1034.6199	953.1076	9	14	18	24	20	1	4	9	5	Oxidation (M); Deamidation (NQ); Carbamidomethylation	137920.16	Plasma membrane calcium-transporting ATPase 4 OS=Homo sapiens OX=9606 GN=ATP2B4 PE=1 SV=2
529	TRUE	Q9UGP4|LIMD1_HUMAN	80.27561	2	291.22244	114.46073							2	1	2					1		Deamidation (NQ)	72190.2	LIM domain-containing protein 1 OS=Homo sapiens OX=9606 GN=LIMD1 PE=1 SV=1
120	TRUE	P52597|HNRPF_HUMAN	285.68036	14	108643.91	75436.34	66235.81	77903.7	34628.79	51737.83	55527.082	92974.87	14	28	29	15	22	18	25	22	26	Deamidation (NQ); Carbamidomethylation; Oxidation (M); Acetylation (N-term)	45671.85	Heterogeneous nuclear ribonucleoprotein F OS=Homo sapiens OX=9606 GN=HNRNPF PE=1 SV=3
12	TRUE	P21333|FLNA_HUMAN	429.57443	82	48062.793	36132.266	5726.81	5453.6143	2894.7368	11817.8545	109904.22	154848.64	77	69	71	18	19	18	34	135	126	Carbamidomethylation; Oxidation (M); Deamidation (NQ)	280739	Filamin-A OS=Homo sapiens OX=9606 GN=FLNA PE=1 SV=4
170	FALSE	P15313|VATB1_HUMAN	145.02484	4	1752.5559	681.7437	1081.565	1178.7299	88.98645	420.6446	1637.9756	1916.3859	4	2	2	3	4	1	1	5	8	Oxidation (M)	56833.035	V-type proton ATPase subunit B, kidney isoform OS=Homo sapiens OX=9606 GN=ATP6V1B1 PE=1 SV=3
17	TRUE	O75369|FLNB_HUMAN	362.64584	63	30425.025	6900.4526	451.7453	2367.1763			28825.12	37913.188	59	39	36	5	16	3	5	84	90	Carbamidomethylation; Oxidation (M); Deamidation (NQ)	278164.03	Filamin-B OS=Homo sapiens OX=9606 GN=FLNB PE=1 SV=2
167	TRUE	Q13740|CD166_HUMAN	198.54353	10	17521.12	13974.174	13652.445	8994.907	347.5285			155.17937	10	19	15	16	9	2			1	Oxidation (M)	65102.277	CD166 antigen OS=Homo sapiens OX=9606 GN=ALCAM PE=1 SV=2
220	TRUE	Q68CP9|ARID2_HUMAN	199.63818	10	2719.9946	2983.379	294.64722	312.0082	297.661	758.0481	1712.8262	3023.1929	10	13	6	2	4	4	4	11	13	Oxidation (M)	197390.86	AT-rich interactive domain-containing protein 2 OS=Homo sapiens OX=9606 GN=ARID2 PE=1 SV=2
329	TRUE	O15400|STX7_HUMAN	167.54434	5			7680.4053	11941.845					5	1	1	12	11					Oxidation (M); Deamidation (NQ)	29815.53	Syntaxin-7 OS=Homo sapiens OX=9606 GN=STX7 PE=1 SV=4
309	TRUE	P13861|KAP2_HUMAN	192.11096	6	2774.6162	2037.763	1559.3824	1876.5605	94.851265	416.6159	1166.5771	1212.319	6	10	6	5	6	1	4	2	8	Oxidation (M); Deamidation (NQ)	45518.402	cAMP-dependent protein kinase type II-alpha regulatory subunit OS=Homo sapiens OX=9606 GN=PRKAR2A PE=1 SV=2
690	TRUE	P17302|CXA1_HUMAN	102.05395	2		222.8295						279.1597	2	1	1				1	1	3		43008.383	Gap junction alpha-1 protein OS=Homo sapiens OX=9606 GN=GJA1 PE=1 SV=2
98	TRUE	P51572|BAP31_HUMAN	226.1583	14	1343.8816	1202.0834	47469.76	52790.99				392.7865	14	5	9	44	52			1	1	Oxidation (M); Deamidation (NQ)	27991.604	B-cell receptor-associated protein 31 OS=Homo sapiens OX=9606 GN=BCAP31 PE=1 SV=3
694	TRUE	Q5VU97|CAHD1_HUMAN	58.62123	2	1408.0017								2	2									142289.62	VWFA and cache domain-containing protein 1 OS=Homo sapiens OX=9606 GN=CACHD1 PE=2 SV=2
688	TRUE	Q16602|CALRL_HUMAN	60.24684	2								77.38107	2	1							1	Oxidation (M)	52929.44	Calcitonin gene-related peptide type 1 receptor OS=Homo sapiens OX=9606 GN=CALCRL PE=1 SV=2
84	TRUE	A0FGR8|ESYT2_HUMAN	317.72076	19	12548.372	11194.375	22273.6	22187.434	2382.5137	3911.974	5178.184	13078.201	19	29	34	35	39	7	14	21	28	Deamidation (NQ); Oxidation (M); Carbamidomethylation	102357.48	Extended synaptotagmin-2 OS=Homo sapiens OX=9606 GN=ESYT2 PE=1 SV=1
453	TRUE	Q13636|RAB31_HUMAN	126.84936	3	2217.3198	2045.6709	2811.1846	2537.665	581.3071	914.6843	1343.8093	1788.8234	2	4	5	5	6	3	2	2	2	Deamidation (NQ); Oxidation (M)	21568.771	Ras-related protein Rab-31 OS=Homo sapiens OX=9606 GN=RAB31 PE=1 SV=1
387	FALSE	P60763|RAC3_HUMAN	131.18472	4	295.6921		2713.1152	3439.086					4	2		6	4				1	Acetylation (N-term); Deamidation (NQ); Carbamidomethylation	21378.854	Ras-related C3 botulinum toxin substrate 3 OS=Homo sapiens OX=9606 GN=RAC3 PE=1 SV=1
20	FALSE	P53675|CLH2_HUMAN	267.07578	14	20625.764	19148.275	14635.643	16082.035	1849.1299	5062.4487	19432.867	21989.857	14	21	23	26	25	9	14	27	28	Oxidation (M); Carbamidomethylation	187029.9	Clathrin heavy chain 2 OS=Homo sapiens OX=9606 GN=CLTCL1 PE=1 SV=2
450	TRUE	P17931|LEG3_HUMAN	131.0314	4	5929.6113	5888.9756	1945.4595	844.02936			209.13382		4	5	5	5	4			2			26152.33	Galectin-3 OS=Homo sapiens OX=9606 GN=LGALS3 PE=1 SV=5
149	TRUE	Q4KMQ2|ANO6_HUMAN	238.3486	14	13675.395	11298.152	7719.5254	5379.1367					14	19	19	17	12					Oxidation (M); Deamidation (NQ)	106164.96	Anoctamin-6 OS=Homo sapiens OX=9606 GN=ANO6 PE=1 SV=2
179	TRUE	P68400|CSK21_HUMAN	214.23991	9	4293.5522	3027.364	5431.4077	5178.0796	347.6537	383.7755	3659.738	4750.8306	9	10	7	10	13	3	4	12	7	Oxidation (M); Deamidation (NQ)	45143.574	Casein kinase II subunit alpha OS=Homo sapiens OX=9606 GN=CSNK2A1 PE=1 SV=1
401	TRUE	O14966|RAB7L_HUMAN	139.72089	4	1709.7537	6456.6494	486.41095	5157.2285	2675.9985	3275.5347	1404.5571	6397.7266	4	6	4	2	4	3	3	4	6	Oxidation (M)	23155.248	Ras-related protein Rab-7L1 OS=Homo sapiens OX=9606 GN=RAB29 PE=1 SV=1
197	TRUE	P26232|CTNA2_HUMAN	235.97388	11		9571.164	86.74654			3713.8633	1237.4331	1035.8794	3	8	16	15	15	3	11	6	8	Deamidation (NQ); Carbamidomethylation; Oxidation (M)	105312.94	Catenin alpha-2 OS=Homo sapiens OX=9606 GN=CTNNA2 PE=1 SV=5
270	TRUE	O96019|ACL6A_HUMAN	188.9446	8	10082.355	5413.139	2278.1978	4444.7505	3368.7646	4542.8394	8154.4165	9180.67	8	10	8	4	5	7	4	10	11	Oxidation (M); Carbamidomethylation	47460.96	Actin-like protein 6A OS=Homo sapiens OX=9606 GN=ACTL6A PE=1 SV=1
229	TRUE	Q15043|S39AE_HUMAN	209.74335	8	11811.641	13585.953	9375.3125	7778.199	1609.8269	1704.6025	628.37573	3693.9175	8	16	8	12	11	6	4	5	9	Oxidation (M); Carbamidomethylation; Deamidation (NQ)	54212.29	Metal cation symporter ZIP14 OS=Homo sapiens OX=9606 GN=SLC39A14 PE=1 SV=3
465	FALSE	P01861|IGHG4_HUMAN	122.69365	3	1444.258	305.54773							3	2	2								35940.555	Immunoglobulin heavy constant gamma 4 OS=Homo sapiens OX=9606 GN=IGHG4 PE=1 SV=1
159	TRUE	Q16643|DREB_HUMAN	245.8821	12	20579.645	19008.002	9619.066	11850.639	4022.3916	7028.864	15003.201	22200.8	12	18	13	12	7	11	9	12	22	Oxidation (M)	71429.29	Drebrin OS=Homo sapiens OX=9606 GN=DBN1 PE=1 SV=4
611	TRUE	Q8NG11|TSN14_HUMAN	83.347755	2	260.59985								2	4	3		1						30690.83	Tetraspanin-14 OS=Homo sapiens OX=9606 GN=TSPAN14 PE=1 SV=1
128	TRUE	Q9P0L0|VAPA_HUMAN	238.75635	11	12588.806	18603.969	75969.87	66056.55	1325.3019	1948.7759	2889.0315	12008.119	10	28	28	46	52	9	18	19	29	Carbamidomethylation; Oxidation (M); Deamidation (NQ)	27893.229	Vesicle-associated membrane protein-associated protein A OS=Homo sapiens OX=9606 GN=VAPA PE=1 SV=3
474	TRUE	P63165|SUMO1_HUMAN	117.75388	4	2787.2148	2255.8027	337.50958	1853.1548	442.84012	2396.5447	488.21997	1847.257	4	6	3	4	5	5	3	3	6	Acetylation (N-term)	11556.984	Small ubiquitin-related modifier 1 OS=Homo sapiens OX=9606 GN=SUMO1 PE=1 SV=1
116	TRUE	Q5T4S7|UBR4_HUMAN	231.61897	19	1019.5962	6890.962	73.61567				1353.6503	2080.2483	19	8	10	1				9	13	Deamidation (NQ); Oxidation (M)	573841	E3 ubiquitin-protein ligase UBR4 OS=Homo sapiens OX=9606 GN=UBR4 PE=1 SV=1
684	TRUE	P13987|CD59_HUMAN	79.63576	2	33440.508	26637.984	16563.732	15408.152		1140.1492	916.74677	1177.793	2	5	6	3	4	1	1	2	1	Carbamidomethylation	14177.284	CD59 glycoprotein OS=Homo sapiens OX=9606 GN=CD59 PE=1 SV=1
455	TRUE	P06702|S10A9_HUMAN	163.22836	4	11147.419	1507.6196						1112.7465	4	12	2				1	1	2	Oxidation (M)	13241.986	Protein S100-A9 OS=Homo sapiens OX=9606 GN=S100A9 PE=1 SV=1
399	TRUE	Q08431|MFGM_HUMAN	144.52167	5	2230.6826	1819.2263		558.67316					5	10	10	1	1						43104.95	Lactadherin OS=Homo sapiens OX=9606 GN=MFGE8 PE=1 SV=3
485	TRUE	P08865|RSSA_HUMAN	143.13687	4	2209.3408	2339.4412				483.41623	1959.695	693.8832	4	4	4				2	3	2	Oxidation (M); Carbamidomethylation	32854.074	40S ribosomal protein SA OS=Homo sapiens OX=9606 GN=RPSA PE=1 SV=4
626	TRUE	Q9NUP9|LIN7C_HUMAN	82.71184	2	729.31	381.8401	312.4068	894.0752		161.61244	365.4015	488.81418	2	1	1	3	2		1	1	3		21833.975	Protein lin-7 homolog C OS=Homo sapiens OX=9606 GN=LIN7C PE=1 SV=1
213	TRUE	P62879|GBB2_HUMAN	207.83638	9		456.64813	829.702	87.577446					3	8	8	15	13	3	3	4	7	Carbamidomethylation; Deamidation (NQ); Oxidation (M); Acetylation (N-term)	37331.027	Guanine nucleotide-binding protein G(I)/G(S)/G(T) subunit beta-2 OS=Homo sapiens OX=9606 GN=GNB2 PE=1 SV=3
302	TRUE	O15118|NPC1_HUMAN	201.72133	7	2999.641	2613.48	9936.003	5346.2134	587.19446	948.2635	1253.5103	1510.2466	7	4	6	17	16	1	2	2	4	Oxidation (M)	142166.84	NPC intracellular cholesterol transporter 1 OS=Homo sapiens OX=9606 GN=NPC1 PE=1 SV=2
323	TRUE	O15258|RER1_HUMAN	184.60031	6	585.00616	1394.9812	12290.619	10649.523					6	1	7	13	10					Acetylation (N-term); Oxidation (M)	22957.965	Protein RER1 OS=Homo sapiens OX=9606 GN=RER1 PE=1 SV=1
553	TRUE	Q8NI17|IL31R_HUMAN	82.739426	3	789.79724	1160.215	806.4497						3	2	3	2							82953.83	Interleukin-31 receptor subunit alpha OS=Homo sapiens OX=9606 GN=IL31RA PE=1 SV=1
521	TRUE	Q7RTP6|MICA3_HUMAN	93.17033	3									3	1					1	1			224294.83	[F-actin]-monooxygenase MICAL3 OS=Homo sapiens OX=9606 GN=MICAL3 PE=1 SV=2
699	TRUE	P98155|VLDLR_HUMAN	87.28383	2									2	2		1							96098.45	Very low-density lipoprotein receptor OS=Homo sapiens OX=9606 GN=VLDLR PE=1 SV=1
106	TRUE	P35354|PGH2_HUMAN	249.5372	16	20382.809	20149.557	11529.154	19580.23	17298.865	25670.953	19136.668	22985.465	16	17	15	18	20	14	33	28	23	Deamidation (NQ); Oxidation (M)	68996.12	Prostaglandin G/H synthase 2 OS=Homo sapiens OX=9606 GN=PTGS2 PE=1 SV=2
134	TRUE	Q07954|LRP1_HUMAN	250.53838	17	3812.5886	2432.0422	227.78438	718.9038					17	17	19	6	9		1	1	2	Oxidation (M)	504606.3	Prolow-density lipoprotein receptor-related protein 1 OS=Homo sapiens OX=9606 GN=LRP1 PE=1 SV=2
574	TRUE	P60903|S10AA_HUMAN	80.83082	3		5624.5527		6134.4077	821.9788		4497.032	4395.3447	3		2		2	2		3	2		11203.1	Protein S100-A10 OS=Homo sapiens OX=9606 GN=S100A10 PE=1 SV=2
523	TRUE	Q99808|S29A1_HUMAN	103.701904	3	2094.0876	1313.4031	1107.6987	836.1851					3	6	4	5	4						50219.44	Equilibrative nucleoside transporter 1 OS=Homo sapiens OX=9606 GN=SLC29A1 PE=1 SV=3
600	TRUE	Q8TEU7|RPGF6_HUMAN	58.720894	2									2								2		179422.81	Rap guanine nucleotide exchange factor 6 OS=Homo sapiens OX=9606 GN=RAPGEF6 PE=1 SV=2
498	TRUE	Q9UL26|RB22A_HUMAN	124.44683	3	265.5985		1089.2507	872.4585				299.24847	2	2	2	4	4	1	1	1	2	Oxidation (M)	21855.06	Ras-related protein Rab-22A OS=Homo sapiens OX=9606 GN=RAB22A PE=1 SV=2
469	TRUE	P13473|LAMP2_HUMAN	130.13083	4	1078.8997	1095.4532	23306.604	13622.976			239.64725		4	5	3	9	8			1			44960.727	Lysosome-associated membrane glycoprotein 2 OS=Homo sapiens OX=9606 GN=LAMP2 PE=1 SV=2
438	TRUE	P20073|ANXA7_HUMAN	148.85551	4	1407.0839	955.8302					947.18787	2206.9797	4	6	3					5	5	Deamidation (NQ)	52739.24	Annexin A7 OS=Homo sapiens OX=9606 GN=ANXA7 PE=1 SV=3
406	TRUE	Q6IAA8|LTOR1_HUMAN	117.78728	3	1431.45	1672.0865	5136.8633	11233.561		561.11383	2432.089	1940.428	3	1	2	7	9	1	2	4	2	Oxidation (M)	17744.818	Ragulator complex protein LAMTOR1 OS=Homo sapiens OX=9606 GN=LAMTOR1 PE=1 SV=2
340	TRUE	P04049|RAF1_HUMAN	144.52832	6	1218.5525	1755.4828	1231.862		288.53387	463.14047	976.4439	2295.2788	6	5	6	3	3	1	5	4	5	Acetylation (N-term); Oxidation (M)	73051.56	RAF proto-oncogene serine/threonine-protein kinase OS=Homo sapiens OX=9606 GN=RAF1 PE=1 SV=1
667	TRUE	P60510|PP4C_HUMAN	92.089615	2	673.6834	581.0828		539.3103			253.6514	1038.1813	2	1	2		1			1	2	Oxidation (M)	35079.92	Serine/threonine-protein phosphatase 4 catalytic subunit OS=Homo sapiens OX=9606 GN=PPP4C PE=1 SV=1
410	TRUE	Q13557|KCC2D_HUMAN	177.26889	5	411.39612	1339.185					2780.1016	2736.123	5	4	6					7	6		56369.402	Calcium/calmodulin-dependent protein kinase type II subunit delta OS=Homo sapiens OX=9606 GN=CAMK2D PE=1 SV=3
618	TRUE	P25445|TNR6_HUMAN	83.19935	2	82.5435			130.59995					2	1	1	2	2				1		37732.2	Tumor necrosis factor receptor superfamily member 6 OS=Homo sapiens OX=9606 GN=FAS PE=1 SV=1
660	TRUE	P11171|EPB41_HUMAN	113.12143	2			507.24933						2	1		4	2						97016.88	Protein 4.1 OS=Homo sapiens OX=9606 GN=EPB41 PE=1 SV=4
16	TRUE	P02786|TFR1_HUMAN	405.65546	53	1357335	1404902.6	1005535.44	911909.94	209717.72	287852.9	264952.3	291595.47	53	233	240	206	192	100	96	96	104	Deamidation (NQ); Oxidation (M); Carbamidomethylation	84871.375	Transferrin receptor protein 1 OS=Homo sapiens OX=9606 GN=TFRC PE=1 SV=2
692	TRUE	P54920|SNAA_HUMAN	70.97557	2			156.62576	134.05096					2			2	1						33232.72	Alpha-soluble NSF attachment protein OS=Homo sapiens OX=9606 GN=NAPA PE=1 SV=3
207	TRUE	Q14344|GNA13_HUMAN	198.76907	10	750.8545	1290.5426	4117.967	2760.0916			434.2648	420.95752	8	4	7	14	14	2	1	3	4	Oxidation (M)	44049.57	Guanine nucleotide-binding protein subunit alpha-13 OS=Homo sapiens OX=9606 GN=GNA13 PE=1 SV=2
645	TRUE	Q53EZ4|CEP55_HUMAN	82.26268	2								747.4129	2							1	3		54178.234	Centrosomal protein of 55 kDa OS=Homo sapiens OX=9606 GN=CEP55 PE=1 SV=3
46	TRUE	P13639|EF2_HUMAN	346.50375	33	18619.998	16586.12	3578.2898	2960.9814	2047.3633	6003.151	66016.76	63987.902	33	26	34	14	12	12	33	65	60	Carbamidomethylation; Oxidation (M)	95338.14	Elongation factor 2 OS=Homo sapiens OX=9606 GN=EEF2 PE=1 SV=4
183	TRUE	P80723|BASP1_HUMAN	258.31827	12	118.043365	106.68179	5338.395	6739.935					12	3	6	27	18			5	7		22693.408	Brain acid soluble protein 1 OS=Homo sapiens OX=9606 GN=BASP1 PE=1 SV=2
1	TRUE	Q15149|PLEC_HUMAN	530.50244	238	357659.78	334453.25	124974.375	186621.86	76285.37	112907.03	302581.7	366119.72	228	344	337	197	254	180	233	311	353	Oxidation (M); Deamidation (NQ); Carbamidomethylation	531790.75	Plectin OS=Homo sapiens OX=9606 GN=PLEC PE=1 SV=3
680	TRUE	Q9BQE4|SELS_HUMAN	94.36107	2	216.69958	192.25143	336.8463	597.0038				71.36035	2	1	2	2	2		2		2	Oxidation (M)	21131.838	Selenoprotein S OS=Homo sapiens OX=9606 GN=SELENOS PE=1 SV=3
202	TRUE	Q13586|STIM1_HUMAN	206.60634	11	3377.9368	3376.365	8661.152	9188.873	540.84265	1329.8477	576.92816	842.2779	11	7	9	12	15	3	6	7	5	Oxidation (M)	77423.38	Stromal interaction molecule 1 OS=Homo sapiens OX=9606 GN=STIM1 PE=1 SV=3
677	TRUE	O75044|SRGP2_HUMAN	82.78633	2	476.12296	317.86227		136.03831			416.5673	524.3645	2	1	3		2	1	2	2	1		120870.55	SLIT-ROBO Rho GTPase-activating protein 2 OS=Homo sapiens OX=9606 GN=SRGAP2 PE=1 SV=3
340	FALSE	P15056|BRAF_HUMAN	103.15137	3	1069.6345	1608.551	1231.862		288.53387	463.14047	976.4439	2295.2788	3	4	4	3	3	1	4	4	4	Oxidation (M)	84436.88	Serine/threonine-protein kinase B-raf OS=Homo sapiens OX=9606 GN=BRAF PE=1 SV=4
392	TRUE	Q6PIU2|NCEH1_HUMAN	188.14758	6	358.23932	780.86145	3896.1265	1895.2236		370.03574	271.5904	409.59067	6	2	5	6	7	1	2	1	1	Carbamidomethylation	45807.848	Neutral cholesterol ester hydrolase 1 OS=Homo sapiens OX=9606 GN=NCEH1 PE=1 SV=3
463	TRUE	Q14677|EPN4_HUMAN	110.80447	4	1143.8889	1102.2454					1025.9072	533.9033	4	3	3		1			3	3		68259.44	Clathrin interactor 1 OS=Homo sapiens OX=9606 GN=CLINT1 PE=1 SV=1
452	TRUE	P37173|TGFR2_HUMAN	117.03993	4	1347.9962	2245.7654	217.89317						4	4	4	3		1	1			Oxidation (M)	64567.71	TGF-beta receptor type-2 OS=Homo sapiens OX=9606 GN=TGFBR2 PE=1 SV=2
458	TRUE	Q5H9R7|PP6R3_HUMAN	139.42798	4		544.4565	359.4728				594.62427	1663.5907	4	2	4	1			1	3	4		97669.09	Serine/threonine-protein phosphatase 6 regulatory subunit 3 OS=Homo sapiens OX=9606 GN=PPP6R3 PE=1 SV=2
184	TRUE	Q96RT1|ERBIN_HUMAN	202.62366	12	1340.259	374.7185	587.77277	418.91898			158.32777	1055.1947	12	7	12	6	3	1	3	5	10	Oxidation (M)	158298.11	Erbin OS=Homo sapiens OX=9606 GN=ERBIN PE=1 SV=2
