# Supplementary material for: Cell-surface tethered promiscuous biotinylators enable comparative small-scale surface proteomic analysis of human extracellular vesicles and cells
Source: eLife journal article supplement (doi:10.7554/elife.73982), 2022-03-04
Supplement: supp [file elife-73982-supp-v1.zip › elife_poa_e73982_Figure_3_figure_supplement_1_source_data_1.csv]

Protein Group,Top,Accession,-10LgP,#Peptides,Area EV_WGA_2,Area EV_WGA_1,Area EV_NHS_2,Area EV_NHS_1,Area EV_Hydrazide_2,Area EV_Hydrazide_1,Area Myc_Hydrazide_1,Area Myc_Hydrazide_2,Area Myc_NHS_1,Area Myc_NHS_2,Area Myc_WGA_1,Area Myc_WGA_2,#Unique,#Spec EV_WGA_2,#Spec EV_WGA_1,#Spec EV_NHS_2,#Spec EV_NHS_1,#Spec EV_Hydrazide_2,#Spec EV_Hydrazide_1,#Spec Myc_Hydrazide_1,#Spec Myc_Hydrazide_2,#S…
515,TRUE,P30520	PURA2_HUMAN,245.68701,12,,,6359.8955,4079.07,1209.1506,,1378.8708,2507.0303,10988.721,13912.808,109.84505,,12,,,9,8,9,1,8,5,23,18,2,1,Oxidation (M); Carbamidomethylation,50097.36,Adenylosuccinate synthetase isozyme 2 OS=Homo sapiens OX=9606 GN=ADSS2 PE=1 SV=3
1191,TRUE,Q9Y219	JAG2_HUMAN,145.3304,3,,178.32623,719.9275,,,,,,,821.3953,,,3,1,3,4,,1,,,,1,2,,,,133366.56,Protein jagged-2 OS=Homo sapiens OX=9606 GN=JAG2 PE=1 SV=3
1139,TRUE,Q969Q5	RAB24_HUMAN,160.92627,4,,314.10785,3195.876,1907.675,,,,,1206.1754,1909.942,,,4,,2,6,4,,,,,3,3,,,,23124.12,Ras-related protein Rab-24 OS=Homo sapiens OX=9606 GN=RAB24 PE=1 SV=1
320,TRUE,P46531	NOTC1_HUMAN,258.978,17,4783.5093,10808.626,9091.447,5363.3135,3530.5066,297.16644,1198.143,2999.1978,9071.422,8059.674,471.43243,5345.965,15,11,21,15,14,7,2,6,8,14,12,9,7,Oxidation (M),272504.7,Neurogenic locus notch homolog protein 1 OS=Homo sapiens OX=9606 GN=NOTCH1 PE=1 SV=4
393,TRUE,P01889	HLAB_HUMAN,310.7978,16,6408.8867,13532.879,58189.074,42315.812,58662.03,11979.065,11265.512,21157.81,24005.008,22919.621,1247.5913,3820.9927,5,21,22,39,37,33,26,22,26,30,29,16,11,Carbamidomethylation,40460.074,"HLA class I histocompatibility antigen, B alpha chain OS=Homo sapiens OX=9606 GN=HLA-B PE=1 SV=3"
510,TRUE,P11166	GTR1_HUMAN,258.50204,9,4240.008,7664.0005,31994.654,24820.186,35529.695,5973.918,30884.738,49463.38,35844.715,36496.65,6522.9297,3468.038,9,7,5,13,11,15,9,15,17,14,14,6,10,Oxidation (M),54083.77,"Solute carrier family 2, facilitated glucose transporter member 1 OS=Homo sapiens OX=9606 GN=SLC2A1 PE=1 SV=2"
773,TRUE,O14735	CDIPT_HUMAN,158.45706,4,2419.6213,3969.9595,15678.691,14244.418,2275.541,102.38959,427.95358,1072.7734,6832.294,5933.7554,2949.078,27303.904,4,7,7,6,8,7,2,4,3,10,7,6,9,Oxidation (M),23538.803,CDP-diacylglycerol--inositol 3-phosphatidyltransferase OS=Homo sapiens OX=9606 GN=CDIPT PE=1 SV=1
1220,TRUE,P38398	BRCA1_HUMAN,126.31955,3,,322.82614,71.85244,,,,,,,,126.87933,302.16754,3,2,4,2,1,,,,,1,2,1,2,,207720.84,Breast cancer type 1 susceptibility protein OS=Homo sapiens OX=9606 GN=BRCA1 PE=1 SV=2
722,TRUE,Q92747	ARC1A_HUMAN,242.6323,8,,,16595.209,12476.859,1687.4841,,,1104.3491,8656.052,9777.449,,,8,,,13,12,6,2,3,4,11,9,,,Carbamidomethylation; Oxidation (M); Acetylation (N-term),41569.29,Actin-related protein 2/3 complex subunit 1A OS=Homo sapiens OX=9606 GN=ARPC1A PE=1 SV=2
670,TRUE,Q8NFH5	NUP35_HUMAN,236.49811,7,,673.38855,8152.536,4013.4753,,,,141.9261,11080.911,12612.823,209.20744,,7,1,2,11,14,,,,1,12,16,2,,Oxidation (M); Carbamidomethylation,34773.754,Nucleoporin NUP35 OS=Homo sapiens OX=9606 GN=NUP35 PE=1 SV=1
1376,TRUE,Q9NYJ8	TAB2_HUMAN,105.65154,2,,440.99628,207.19296,,,,,132.94962,328.35425,514.4182,278.91443,,2,,1,2,1,,,,1,2,2,5,,Acetylation (N-term); Oxidation (M),76494.14,TGF-beta-activated kinase 1 and MAP3K7-binding protein 2 OS=Homo sapiens OX=9606 GN=TAB2 PE=1 SV=1
754,TRUE,Q9Y3L5	RAP2C_HUMAN,176.70041,6,,1019.40576,1500.4529,2307.7935,383.24695,,,,1296.5958,1775.1667,,288.32083,2,4,7,11,11,4,2,2,2,8,5,3,5,Carbamidomethylation; Oxidation (M),20744.758,Ras-related protein Rap-2c OS=Homo sapiens OX=9606 GN=RAP2C PE=1 SV=1
1246,TRUE,Q9NZ43	USE1_HUMAN,130.1333,3,,,,690.145,,,,,1312.6017,885.83,,,3,,,5,4,1,,,,2,2,,,Oxidation (M),29371.125,Vesicle transport protein USE1 OS=Homo sapiens OX=9606 GN=USE1 PE=1 SV=2
767,TRUE,P62330	ARF6_HUMAN,171.78351,6,8285.68,18342.504,22993.475,17778.098,12915.114,1480.5278,6828.917,11492.332,30755.12,32705.143,12192.103,14842.461,6,9,13,12,15,15,7,8,12,14,18,9,11,Carbamidomethylation; Oxidation (M),20082.152,ADP-ribosylation factor 6 OS=Homo sapiens OX=9606 GN=ARF6 PE=1 SV=2
463,TRUE,Q8WTV0	SCRB1_HUMAN,213.25903,9,32040.39,42518.844,35698.188,33078.836,128487.07,26566.053,130106.89,140773.58,51770.605,47292.266,62793.91,60696.25,9,16,22,17,18,26,20,30,28,14,15,23,18,Oxidation (M),60877.855,Scavenger receptor class B member 1 OS=Homo sapiens OX=9606 GN=SCARB1 PE=1 SV=1
806,TRUE,Q8NF37	PCAT1_HUMAN,209.35799,8,4163.0625,4852.1313,21089.914,16857.441,3569.4219,499.20117,784.4629,1208.1355,9610.225,7603.5444,2320.8198,2820.704,8,7,5,9,7,6,6,4,3,7,8,5,4,Carbamidomethylation,59151.35,Lysophosphatidylcholine acyltransferase 1 OS=Homo sapiens OX=9606 GN=LPCAT1 PE=1 SV=2
1114,TRUE,O75915	PRAF3_HUMAN,134.48293,3,230.08841,,6655.8984,5576.8115,,,,,431.20654,,,,3,1,,5,6,,,,,1,,,,Oxidation (M),21614.703,PRA1 family protein 3 OS=Homo sapiens OX=9606 GN=ARL6IP5 PE=1 SV=1
1424,TRUE,Q9BV57	MTND_HUMAN,71.07921,2,,,,,,,,,620.83734,,,,2,,,,,,,,,1,1,,1,Oxidation (M),21498.387,"1,2-dihydroxy-3-keto-5-methylthiopentene dioxygenase OS=Homo sapiens OX=9606 GN=ADI1 PE=1 SV=1"
914,TRUE,P28482	MK01_HUMAN,200.70123,6,135.58054,1221.383,3275.505,2156.7534,789.5419,,290.14215,1426.0321,6185.9023,6197.6255,1272.6416,2059.5466,3,2,3,9,7,2,,2,2,7,7,7,6,Carbamidomethylation,41389.703,Mitogen-activated protein kinase 1 OS=Homo sapiens OX=9606 GN=MAPK1 PE=1 SV=3
1106,TRUE,P63098	CANB1_HUMAN,172.51228,4,,,4513.501,1302.1475,4237.067,67.7122,2292.948,10772.467,14260.053,4843.7783,756.27985,394.13824,4,2,1,4,4,4,5,5,6,5,5,3,1,,19299.902,Calcineurin subunit B type 1 OS=Homo sapiens OX=9606 GN=PPP3R1 PE=1 SV=2
1317,TRUE,Q6RW13	ATRAP_HUMAN,129.61104,2,,883.1293,1804.1727,278.11493,,,,,3063.565,1553.1237,257.3288,,2,3,2,7,6,5,,1,,6,4,4,,,17419.203,Type-1 angiotensin II receptor-associated protein OS=Homo sapiens OX=9606 GN=AGTRAP PE=1 SV=1
495,TRUE,P30419	NMT1_HUMAN,299.12997,11,199.95743,832.711,12688.56,7529.064,1145.8195,,,1690.4929,13421.345,18045.07,511.60895,493.42328,11,3,1,14,21,5,1,4,4,12,15,1,1,Oxidation (M); Carbamidomethylation,56806.18,Glycylpeptide N-tetradecanoyltransferase 1 OS=Homo sapiens OX=9606 GN=NMT1 PE=1 SV=2
1350,TRUE,Q8TCG1	CIP2A_HUMAN,69.88881,2,,,,,,,,,,351.85635,,,2,,,1,,,,,,,1,,,,102184.99,Protein CIP2A OS=Homo sapiens OX=9606 GN=CIP2A PE=1 SV=2
1104,TRUE,Q8TCG2	P4K2B_HUMAN,100.13538,4,,,1256.188,924.252,,,,,596.28656,167.56305,,,4,,,5,5,,,,,2,2,,1,,54744.207,Phosphatidylinositol 4-kinase type 2-beta OS=Homo sapiens OX=9606 GN=PI4K2B PE=1 SV=1
424,TRUE,P98194	AT2C1_HUMAN,270.8483,12,,,6138.127,2286.873,824.51636,,,,7965.5215,8507.14,,,12,,,20,12,6,1,,,17,25,,,Oxidation (M); Carbamidomethylation,100577.27,Calcium-transporting ATPase type 2C member 1 OS=Homo sapiens OX=9606 GN=ATP2C1 PE=1 SV=3
253,TRUE,O43815	STRN_HUMAN,334.328,20,2368.2358,9866.432,38606.777,25900.188,5400.019,,917.1089,4905.492,28633.473,32809.746,3336.9072,3963.3027,20,18,16,31,23,14,5,5,15,28,31,11,10,Carbamidomethylation; Oxidation (M); Acetylation (N-term),86132.11,Striatin OS=Homo sapiens OX=9606 GN=STRN PE=1 SV=4
230,TRUE,P33121	ACSL1_HUMAN,320.1719,21,,2738.188,56019.56,30795.312,15037.52,146.92712,2610.0405,7222.569,16927.781,19508.586,,549.2777,21,6,10,35,34,19,15,10,13,18,16,,4,Carbamidomethylation; Oxidation (M); Acetylation (N-term),77943.33,Long-chain-fatty-acid--CoA ligase 1 OS=Homo sapiens OX=9606 GN=ACSL1 PE=1 SV=1
1090,TRUE,Q08554	DSC1_HUMAN,137.36604,4,,368.63416,,,790.53687,,806.37854,1441.3555,,,173.23392,872.40967,4,1,2,1,2,4,,5,5,1,1,2,2,,99986.83,Desmocollin-1 OS=Homo sapiens OX=9606 GN=DSC1 PE=1 SV=2
1192,TRUE,P31641	SC6A6_HUMAN,88.94072,3,,,,,329.8358,,208.17723,905.3514,,,,,2,,,,,2,,4,1,1,1,,,Carbamidomethylation; Oxidation (M),69830.05,Sodium- and chloride-dependent taurine transporter OS=Homo sapiens OX=9606 GN=SLC6A6 PE=1 SV=2
635,TRUE,Q92692	NECT2_HUMAN,248.68231,8,5516.3486,15074.705,8649.903,5523.8975,13790.01,1685.2004,6322.29,14752.175,8889.882,10654.3955,7591.172,11106.016,8,7,13,15,11,21,5,10,18,16,20,11,14,Oxidation (M); Carbamidomethylation,57742.03,Nectin-2 OS=Homo sapiens OX=9606 GN=NECTIN2 PE=1 SV=1
1371,TRUE,Q96AD5	PLPL2_HUMAN,94.80968,2,,,,173.13295,,,,,,,,,2,,,1,4,,,,,1,3,,,,55315.91,Patatin-like phospholipase domain-containing protein 2 OS=Homo sapiens OX=9606 GN=PNPLA2 PE=1 SV=1
95,TRUE,P54652	HSP72_HUMAN,405.54105,41,2581.8335,6611.5186,28978.232,24275.916,7944.32,496.50467,1453.9097,2149.7756,11208.729,10995.96,1577.2036,1404.0028,11,46,47,85,87,44,32,35,57,105,96,38,41,Carbamidomethylation; Oxidation (M); Acetylation (N-term),70020.97,Heat shock-related 70 kDa protein 2 OS=Homo sapiens OX=9606 GN=HSPA2 PE=1 SV=1
212,TRUE,Q16513	PKN2_HUMAN,286.44724,22,276.60736,1348.0631,8358.66,7097.5,11224.647,353.9281,7405.968,12353.482,9681.752,13263.443,1227.3759,1550.8009,22,4,5,18,20,28,13,18,24,15,22,8,6,Acetylation (N-term); Oxidation (M); Carbamidomethylation,112034.6,Serine/threonine-protein kinase N2 OS=Homo sapiens OX=9606 GN=PKN2 PE=1 SV=1
524,TRUE,Q8WXX5	DNJC9_HUMAN,236.99756,10,434.86957,1077.9407,14789.473,12640.405,3561.1328,211.55743,1478.3868,2267.7976,16560.762,19141.201,863.35974,857.43695,10,3,4,18,19,8,5,5,5,14,15,1,3,Oxidation (M); Carbamidomethylation,29909.709,DnaJ homolog subfamily C member 9 OS=Homo sapiens OX=9606 GN=DNAJC9 PE=1 SV=1
692,TRUE,Q0VDF9	HSP7E_HUMAN,222.92772,9,,,1459.3911,1184.7432,1616.3215,,1329.6992,4215.1,2523.1025,2840.8901,182.39029,353.6866,9,,1,9,9,5,2,5,8,6,5,2,1,,54794.43,Heat shock 70 kDa protein 14 OS=Homo sapiens OX=9606 GN=HSPA14 PE=1 SV=1
1081,TRUE,O60266	ADCY3_HUMAN,146.89339,4,,,,,,,178.34987,435.26666,1379.7535,,,,4,,,1,,1,,4,6,1,1,,,,128959.99,Adenylate cyclase type 3 OS=Homo sapiens OX=9606 GN=ADCY3 PE=1 SV=3
1407,TRUE,Q9Y6X5	ENPP4_HUMAN,95.98858,2,,,,,511.4577,,,82.56323,,,,,2,,,,,3,,,1,,,,,,51641.1,Bis(5'-adenosyl)-triphosphatase ENPP4 OS=Homo sapiens OX=9606 GN=ENPP4 PE=1 SV=3
450,TRUE,P01130	LDLR_HUMAN,320.5339,13,40972.402,80549.66,71438.97,58710.242,67456.36,12784.566,26541.06,43113.496,59048.402,61585.57,21520.094,25757.967,12,28,32,38,35,31,19,26,37,29,30,22,21,Oxidation (M); Carbamidomethylation,95376.016,Low-density lipoprotein receptor OS=Homo sapiens OX=9606 GN=LDLR PE=1 SV=1
299,TRUE,P04626	ERBB2_HUMAN,280.20233,16,1979.1978,7982.448,4143.6045,2379.2385,4240.9355,125.54356,1574.928,6422.5645,5342.9,6564.9473,3377.642,6697.7246,12,20,30,18,13,22,4,19,20,19,18,16,20,Carbamidomethylation; Oxidation (M),137910.48,Receptor tyrosine-protein kinase erbB-2 OS=Homo sapiens OX=9606 GN=ERBB2 PE=1 SV=1
661,TRUE,Q02487	DSC2_HUMAN,201.61696,9,483.8099,850.9804,2730.8557,2213.8816,470.10223,,199.39722,187.09813,1100.7574,1834.6638,,259.60178,8,8,5,14,8,5,,1,2,8,7,1,5,Oxidation (M); Carbamidomethylation,99961.68,Desmocollin-2 OS=Homo sapiens OX=9606 GN=DSC2 PE=1 SV=1
373,TRUE,O15144	ARPC2_HUMAN,289.0723,14,,520.5448,56705.605,41393.01,2427.4739,,1382.6125,4353.596,48791.58,52530.918,,,14,,3,26,17,7,4,7,9,20,21,1,1,Oxidation (M); Carbamidomethylation,34333.016,Actin-related protein 2/3 complex subunit 2 OS=Homo sapiens OX=9606 GN=ARPC2 PE=1 SV=1
589,TRUE,Q96S59	RANB9_HUMAN,218.39691,9,2454.3425,3990.2083,3747.192,1649.7688,,,,,3633.5957,2588.0835,697.20123,1248.7871,9,4,6,9,9,,,,,4,4,1,3,Carbamidomethylation; Oxidation (M),77847.305,Ran-binding protein 9 OS=Homo sapiens OX=9606 GN=RANBP9 PE=1 SV=1
777,TRUE,P61225	RAP2B_HUMAN,205.80743,7,3871.0605,17562.61,15622.078,13595.037,4609.721,,2964.8506,4862.731,10137.878,16257.796,3270.208,5076.3936,4,7,8,9,8,4,5,6,6,7,6,4,6,Carbamidomethylation; Oxidation (M),20504.354,Ras-related protein Rap-2b OS=Homo sapiens OX=9606 GN=RAP2B PE=1 SV=1
664,TRUE,P51805	PLXA3_HUMAN,211.09592,8,,,,,,,,,380.06122,310.6954,,,2,12,18,14,11,19,11,19,21,13,19,17,13,Oxidation (M),207702.83,Plexin-A3 OS=Homo sapiens OX=9606 GN=PLXNA3 PE=1 SV=2
683,TRUE,P56199	ITA1_HUMAN,194.55893,8,2396.5876,4982.589,153.23055,340.3984,2087.1416,,419.37555,361.4141,,323.01724,367.67395,1015.125,8,5,11,6,4,10,2,2,3,,1,5,7,Carbamidomethylation; Oxidation (M),130847.78,Integrin alpha-1 OS=Homo sapiens OX=9606 GN=ITGA1 PE=1 SV=2
199,TRUE,Q9UKV3	ACINU_HUMAN,341.88617,28,2831.1565,4221.793,84437.63,65503.105,7969.917,750.3309,2412.2437,395.73843,45910.99,57622.715,4640.5005,3017.915,28,9,9,56,51,10,4,5,3,34,40,5,7,Acetylation (N-term); Carbamidomethylation,151861.52,Apoptotic chromatin condensation inducer in the nucleus OS=Homo sapiens OX=9606 GN=ACIN1 PE=1 SV=2
1306,TRUE,Q9ULV3	CIZ1_HUMAN,75.02061,2,,,224.96074,266.4333,,,,,,,,,2,1,,1,1,,,,,1,1,,,,100045.22,Cip1-interacting zinc finger protein OS=Homo sapiens OX=9606 GN=CIZ1 PE=1 SV=2
1074,TRUE,Q99962	SH3G2_HUMAN,145.5449,4,447.20642,1450.1069,2045.0261,807.71655,2018.0911,,648.1977,1536.2024,5002.1772,6196.635,317.5265,1263.9198,4,2,1,5,3,5,3,5,7,6,6,3,4,,39962.312,Endophilin-A1 OS=Homo sapiens OX=9606 GN=SH3GL2 PE=1 SV=1
460,TRUE,Q9UL25	RAB21_HUMAN,284.181,13,3919.0876,7605.1914,56410.74,43567.934,6065.643,427.89008,1701.1495,4966.7153,28101.04,24601.307,1885.7113,935.5175,12,12,10,26,28,7,14,8,8,17,22,5,6,Acetylation (N-term); Carbamidomethylation; Oxidation (M),24347.564,Ras-related protein Rab-21 OS=Homo sapiens OX=9606 GN=RAB21 PE=1 SV=3
391,TRUE,Q8NBJ4	GOLM1_HUMAN,273.20657,16,,230.68867,9412.691,5167.968,25269.621,3603.2212,4146.6885,10359.704,5468.9385,8838.749,133.36531,339.74506,16,,2,16,11,25,17,14,18,12,9,4,3,Carbamidomethylation,45333.24,Golgi membrane protein 1 OS=Homo sapiens OX=9606 GN=GOLM1 PE=1 SV=1
521,TRUE,O00299	CLIC1_HUMAN,288.45834,12,6240.6084,12951.396,78102.93,58409.516,53272.887,11712.899,36357.79,50231.875,87270.2,91321.71,12192.108,13424.196,11,4,8,19,22,17,9,12,9,21,20,5,5,Carbamidomethylation; Oxidation (M),26922.723,Chloride intracellular channel protein 1 OS=Homo sapiens OX=9606 GN=CLIC1 PE=1 SV=4
447,TRUE,Q8N0X7	SPART_HUMAN,271.22418,15,2038.0991,5145.334,6053.643,3042.555,1597.8877,,1545.6454,2419.857,11229.317,13563.842,4578.047,6692.2534,15,3,8,16,4,3,3,3,3,21,15,10,13,Carbamidomethylation,72833.01,Spartin OS=Homo sapiens OX=9606 GN=SPART PE=1 SV=1
1175,TRUE,P24666	PPAC_HUMAN,144.31702,3,2526.6624,3199.776,1882.1626,2521.1335,2561.7642,171.3216,3629.2039,2944.649,2825.216,8024.8916,7543.3145,9949.537,3,5,3,2,2,2,1,5,5,2,4,8,7,,18042.479,Low molecular weight phosphotyrosine protein phosphatase OS=Homo sapiens OX=9606 GN=ACP1 PE=1 SV=3
185,TRUE,P22223	CADH3_HUMAN,369.4247,25,67250.24,91989.78,72534.664,53138.113,87802.78,14693.617,73342.71,108459.25,128740.91,128909.12,87092.305,97851.93,23,55,63,51,36,57,37,50,49,60,63,50,48,Oxidation (M); Carbamidomethylation,91418.4,Cadherin-3 OS=Homo sapiens OX=9606 GN=CDH3 PE=1 SV=2
438,TRUE,Q14680	MELK_HUMAN,271.34558,11,,1293.229,3158.1777,1053.0232,,,,559.6055,1956.2275,1773.5759,,734.9739,11,3,8,17,14,4,,,1,15,12,2,3,Carbamidomethylation; Oxidation (M),74642.086,Maternal embryonic leucine zipper kinase OS=Homo sapiens OX=9606 GN=MELK PE=1 SV=3
1313,TRUE,P46019	KPB2_HUMAN,78.15509,2,,,,107.316956,,,,,243.44652,,,,2,,,1,1,,,,,2,2,,,,138408.03,"Phosphorylase b kinase regulatory subunit alpha, liver isoform OS=Homo sapiens OX=9606 GN=PHKA2 PE=1 SV=1"
951,TRUE,Q6N022	TEN4_HUMAN,150.48047,6,,,,,,,,595.869,228.9516,,,520.2797,5,,,,,,,2,7,2,,4,2,,307956.6,Teneurin-4 OS=Homo sapiens OX=9606 GN=TENM4 PE=1 SV=2
1206,TRUE,Q96I34	PP16A_HUMAN,97.41269,3,,,734.84686,,752.08325,,220.97144,463.19232,,,,,3,,,1,,3,,2,2,,,,,,57811.38,Protein phosphatase 1 regulatory subunit 16A OS=Homo sapiens OX=9606 GN=PPP1R16A PE=1 SV=1
467,FALSE,P06241	FYN_HUMAN,137.45921,4,651.5184,1623.5151,,,2342.2886,464.2785,2119.8005,3241.1533,2295.2678,2360.5918,1277.6241,1506.6835,2,7,8,5,6,10,6,8,10,5,7,7,10,,60761.9,Tyrosine-protein kinase Fyn OS=Homo sapiens OX=9606 GN=FYN PE=1 SV=3
601,TRUE,Q641Q2	WAC2A_HUMAN,256.80124,11,,,2718.5308,2103.7168,363.87622,,189.79828,,5856.1694,6401.002,,,11,,,10,6,2,,1,,9,10,,,,147183.77,WASH complex subunit 2A OS=Homo sapiens OX=9606 GN=WASHC2A PE=1 SV=3
295,TRUE,P11413	G6PD_HUMAN,313.4649,17,1686.6805,4836.0347,29961.125,18719.887,10403.707,1035.0294,4849.4546,11192.848,17542.422,21722.79,2369.3843,2858.8938,17,8,10,20,25,13,6,9,14,19,18,5,6,Carbamidomethylation; Oxidation (M),59256.746,Glucose-6-phosphate 1-dehydrogenase OS=Homo sapiens OX=9606 GN=G6PD PE=1 SV=4
1094,TRUE,Q9UEY8	ADDG_HUMAN,109.61218,4,,,650.32776,415.59076,,,,,860.094,402.25156,,,4,1,,2,2,,,,,2,3,1,1,Oxidation (M),79154.64,Gamma-adducin OS=Homo sapiens OX=9606 GN=ADD3 PE=1 SV=1
878,TRUE,Q96D31	CRCM1_HUMAN,173.30162,6,,,,,5055.821,874.275,2865.4792,8074.2407,,,,,6,,,,1,6,3,3,10,1,,,,Acetylation (N-term),32668.44,Calcium release-activated calcium channel protein 1 OS=Homo sapiens OX=9606 GN=ORAI1 PE=1 SV=2
198,TRUE,P50570	DYN2_HUMAN,329.3663,23,1858.6237,3909.0164,12130.754,9417.797,3402.9287,,2136.7317,3084.3835,10360.2,10549.715,898.6551,3251.603,17,13,21,36,35,11,4,14,16,30,29,13,18,Oxidation (M); Carbamidomethylation,98064.305,Dynamin-2 OS=Homo sapiens OX=9606 GN=DNM2 PE=1 SV=2
843,TRUE,Q9UNZ2	NSF1C_HUMAN,185.98886,7,,,4324.115,2726.9644,,,,,4387.338,5543.8843,,,7,,,8,6,,,,1,6,10,,,,40572.832,NSFL1 cofactor p47 OS=Homo sapiens OX=9606 GN=NSFL1C PE=1 SV=2
1051,TRUE,O15431	COPT1_HUMAN,139.50644,2,4182.15,3362.933,10538.758,7438.8667,12243.68,2989.9675,9356.454,11352.948,23034.096,15484.252,11575.48,11255.5205,2,11,15,16,15,16,10,22,23,22,18,13,18,Carbamidomethylation; Oxidation (M),21090.621,High affinity copper uptake protein 1 OS=Homo sapiens OX=9606 GN=SLC31A1 PE=1 SV=1
492,TRUE,P49023	PAXI_HUMAN,254.86734,10,5957.6455,11587.532,12541.146,8154.394,7677.6475,357.59048,3884.8716,8175.499,14983.851,11312.734,6728.4346,9531.1875,10,14,22,20,16,13,4,12,15,21,18,25,20,Oxidation (M); Carbamidomethylation,64505.305,Paxillin OS=Homo sapiens OX=9606 GN=PXN PE=1 SV=3
631,TRUE,Q96BM9	ARL8A_HUMAN,238.85367,8,595.88385,3684.085,24809.818,19903.484,5783.528,,1487.9844,4066.315,19988.604,19552.281,483.06226,659.4082,8,3,8,17,11,11,8,6,6,9,15,2,2,Oxidation (M); Carbamidomethylation,21415.89,ADP-ribosylation factor-like protein 8A OS=Homo sapiens OX=9606 GN=ARL8A PE=1 SV=1
1178,TRUE,Q9C0H2	TTYH3_HUMAN,107.265366,2,,,360.94788,310.38385,269.4243,,,,272.65305,,,,2,,,1,1,5,3,1,1,1,1,1,2,Oxidation (M),57544.72,Protein tweety homolog 3 OS=Homo sapiens OX=9606 GN=TTYH3 PE=1 SV=3
85,TRUE,O75165	DJC13_HUMAN,382.13348,46,601.9177,3541.4897,21522.922,11532.358,2366.9653,,889.78125,694.7163,22936.516,21772.24,278.3423,494.30542,46,13,12,53,39,10,1,5,10,45,52,7,7,Oxidation (M); Carbamidomethylation,254414.89,DnaJ homolog subfamily C member 13 OS=Homo sapiens OX=9606 GN=DNAJC13 PE=1 SV=5
682,TRUE,Q8N884	CGAS_HUMAN,179.64452,8,551.629,2343.2256,3037.1802,2593.9055,2163.811,,347.07172,2265.4548,2581.2705,6172.7695,1075.1692,2361.9326,8,7,6,9,7,10,1,5,5,5,8,7,7,Oxidation (M),58814.473,Cyclic GMP-AMP synthase OS=Homo sapiens OX=9606 GN=CGAS PE=1 SV=2
857,TRUE,Q969P0	IGSF8_HUMAN,231.24605,7,2120.7258,5162.0854,1584.8345,1457.5908,4416.205,107.37709,1709.058,4576.7656,1686.9548,3006.6284,1647.7363,3919.1997,7,4,8,6,5,5,6,7,6,3,5,8,5,,65034.24,Immunoglobulin superfamily member 8 OS=Homo sapiens OX=9606 GN=IGSF8 PE=1 SV=1
1331,TRUE,Q13356	PPIL2_HUMAN,96.69112,2,,,,,,,,,564.3609,336.44772,,,2,,1,,2,,,,,3,1,,,,58823.457,RING-type E3 ubiquitin-protein ligase PPIL2 OS=Homo sapiens OX=9606 GN=PPIL2 PE=1 SV=1
403,TRUE,Q96KP1	EXOC2_HUMAN,272.52295,13,2813.4802,5273.1123,6762.313,8492.899,6105.9497,148.7118,3009.1348,5765.9375,6073.161,6340.9365,1646.3005,2720.7012,13,11,17,16,13,13,6,9,15,11,15,8,14,Oxidation (M),104066.266,Exocyst complex component 2 OS=Homo sapiens OX=9606 GN=EXOC2 PE=1 SV=1
1066,TRUE,Q13445	TMED1_HUMAN,156.76228,4,,,4303.5967,2248.501,1291.459,,79.30835,841.051,2762.1191,3465.5352,,,4,,,4,5,5,3,1,4,4,3,,,Carbamidomethylation,25205.795,Transmembrane emp24 domain-containing protein 1 OS=Homo sapiens OX=9606 GN=TMED1 PE=1 SV=1
1125,TRUE,Q8IY63	AMOL1_HUMAN,122.42062,4,,,,,,,,181.70775,,,,1331.8159,4,,2,1,1,,,,1,2,,,1,,106574.2,Angiomotin-like protein 1 OS=Homo sapiens OX=9606 GN=AMOTL1 PE=1 SV=1
52,TRUE,P13645	K1C10_HUMAN,460.43942,55,156707.52,244734.12,234234.11,187625.4,375710.88,91854.69,488289.22,672988.94,295783.38,281583.62,285421.8,364074.78,51,102,115,94,87,99,77,152,175,94,95,105,116,Oxidation (M); Carbamidomethylation,58827.086,"Keratin, type I cytoskeletal 10 OS=Homo sapiens OX=9606 GN=KRT10 PE=1 SV=6"
180,TRUE,Q9UHB6	LIMA1_HUMAN,345.92343,28,27268.49,58687.965,160414.25,108079.125,30378.72,3087.1006,8999.884,19049.586,133448.11,130708.84,24843.607,39113.074,28,34,43,65,61,33,17,29,27,48,49,30,38,Carbamidomethylation; Oxidation (M); Acetylation (N-term),85225.55,LIM domain and actin-binding protein 1 OS=Homo sapiens OX=9606 GN=LIMA1 PE=1 SV=1
990,TRUE,P62942	FKB1A_HUMAN,164.3567,4,,,1790.7625,5896.038,,,568.13666,520.96655,13531.663,7349.7783,670.43585,842.8727,4,1,1,5,7,2,,1,2,7,7,3,1,Oxidation (M),11950.701,Peptidyl-prolyl cis-trans isomerase FKBP1A OS=Homo sapiens OX=9606 GN=FKBP1A PE=1 SV=2
1272,TRUE,O75689	ADAP1_HUMAN,124.374535,3,888.94617,2105.5347,,,,,,344.23224,,157.76408,493.40344,1056.96,2,5,4,1,2,3,,1,2,,1,5,4,,43395.27,Arf-GAP with dual PH domain-containing protein 1 OS=Homo sapiens OX=9606 GN=ADAP1 PE=1 SV=2
828,TRUE,P01137	TGFB1_HUMAN,181.48845,6,,,594.7327,674.5107,535.31067,,,190.99698,1481.0857,1122.8156,,,6,,1,7,6,8,2,4,3,7,8,,,Oxidation (M),44341.152,Transforming growth factor beta-1 proprotein OS=Homo sapiens OX=9606 GN=TGFB1 PE=1 SV=2
404,TRUE,O95359	TACC2_HUMAN,244.77655,16,111.15639,1854.1233,5047.5527,2799.2434,477.82703,,,1042.2183,970.1025,1763.4596,295.91992,144.13737,16,8,8,15,8,8,1,4,6,7,7,6,5,Oxidation (M),309427.4,Transforming acidic coiled-coil-containing protein 2 OS=Homo sapiens OX=9606 GN=TACC2 PE=1 SV=3
783,TRUE,Q9UNF0	PACN2_HUMAN,192.10391,8,,,2650.1694,823.6751,671.12463,,160.2728,1088.9125,2453.2434,2772.5605,,,8,,,9,8,4,1,2,4,5,7,,1,,55738.633,Protein kinase C and casein kinase substrate in neurons protein 2 OS=Homo sapiens OX=9606 GN=PACSIN2 PE=1 SV=2
242,TRUE,P32926	DSG3_HUMAN,295.40918,17,2244.6992,6457.6167,2554.3428,127730.555,3378.5044,,2430.8462,8548.954,6604.7686,8628.955,3566.4727,5508.257,17,12,11,15,9,14,2,14,16,15,23,12,19,Carbamidomethylation; Oxidation (M),107533.02,Desmoglein-3 OS=Homo sapiens OX=9606 GN=DSG3 PE=1 SV=2
794,TRUE,P11279	LAMP1_HUMAN,237.10802,8,331.51175,272.65485,32366.238,25902.555,133483.48,36670.03,36525.18,53019.215,28195.393,27402.867,498.3267,,8,3,2,9,11,22,11,12,15,11,7,2,2,,44882.35,Lysosome-associated membrane glycoprotein 1 OS=Homo sapiens OX=9606 GN=LAMP1 PE=1 SV=3
78,TRUE,Q13308	PTK7_HUMAN,431.85388,43,228202.22,475493.06,263019.38,205549.3,376634.5,80737.055,283581.38,431302.84,401840.75,358919.53,347721.16,443001.2,43,94,113,83,80,96,59,108,133,97,92,92,104,Carbamidomethylation; Oxidation (M),118391.63,Inactive tyrosine-protein kinase 7 OS=Homo sapiens OX=9606 GN=PTK7 PE=1 SV=2
848,TRUE,Q9UK41	VPS28_HUMAN,180.08171,5,1557.5533,,2163.0068,1445.8605,,,,2693.3364,1856.794,976.59204,264.441,,5,6,1,5,6,,,,1,10,5,3,1,Carbamidomethylation; Acetylation (N-term); Oxidation (M),25425.162,Vacuolar protein sorting-associated protein 28 homolog OS=Homo sapiens OX=9606 GN=VPS28 PE=1 SV=1
189,TRUE,Q96TA1	NIBA2_HUMAN,339.56372,22,1265.3833,5018.619,32716.562,23783.219,29280.312,4252.578,16054.106,30987.934,29712.146,27264.516,1711.6421,2961.9688,22,9,13,29,35,33,23,23,32,35,31,9,6,Carbamidomethylation; Oxidation (M),84137.86,Protein Niban 2 OS=Homo sapiens OX=9606 GN=NIBAN2 PE=1 SV=3
459,TRUE,Q08174	PCDH1_HUMAN,248.22556,12,2503.136,6081.6646,3388.5205,1781.0393,6667.76,,10085.47,13728.951,13673.65,15157.433,6502.383,11061.448,12,10,9,9,6,13,9,14,11,12,15,11,15,Oxidation (M),114743.414,Protocadherin-1 OS=Homo sapiens OX=9606 GN=PCDH1 PE=1 SV=2
1385,TRUE,Q96GZ6	S41A3_HUMAN,103.541855,2,,,1652.9423,955.7521,,,,,,,,,2,,,3,1,,,,,,,,2,,54766.688,Solute carrier family 41 member 3 OS=Homo sapiens OX=9606 GN=SLC41A3 PE=1 SV=2
959,TRUE,Q96BD0	SO4A1_HUMAN,172.76245,6,428.26114,718.4774,3319.685,,3706.3152,393.63812,648.32556,1798.4705,1803.528,1616.49,,555.2352,6,2,3,5,1,3,3,5,7,7,4,2,6,Carbamidomethylation,77193.34,Solute carrier organic anion transporter family member 4A1 OS=Homo sapiens OX=9606 GN=SLCO4A1 PE=1 SV=2
1413,TRUE,Q15390	MTFR1_HUMAN,130.1405,2,168.99017,191.48602,1591.1881,1308.9648,,,,,1767.7815,1825.0193,353.41248,367.8314,2,1,1,2,2,2,,2,,1,1,3,2,,37000.496,Mitochondrial fission regulator 1 OS=Homo sapiens OX=9606 GN=MTFR1 PE=1 SV=2
294,TRUE,O14936	CSKP_HUMAN,287.70135,18,81.04846,682.688,3845.9507,2472.0708,12495.65,570.34766,8817.914,16814.105,3815.563,5009.576,1475.8309,807.6033,18,1,3,13,6,23,10,24,23,13,18,4,5,Carbamidomethylation; Oxidation (M),105122.734,Peripheral plasma membrane protein CASK OS=Homo sapiens OX=9606 GN=CASK PE=1 SV=3
64,TRUE,Q15075	EEA1_HUMAN,411.93475,54,259.0491,1958.1556,41916.547,29865.11,7573.3574,,2933.4045,7498.846,67411.03,63588.816,1292.8723,2820.2244,54,10,14,70,53,32,11,28,30,64,62,16,13,Oxidation (M),162465.75,Early endosome antigen 1 OS=Homo sapiens OX=9606 GN=EEA1 PE=1 SV=2
161,TRUE,P04792	HSPB1_HUMAN,378.96674,29,527316.9,752303.3,822783.8,687508.56,63948.12,17744.709,60164.438,86640.445,997693.25,1275656.8,652450.94,680016.8,29,79,95,103,95,24,19,35,33,110,119,105,101,Oxidation (M),22782.52,Heat shock protein beta-1 OS=Homo sapiens OX=9606 GN=HSPB1 PE=1 SV=2
718,TRUE,O00264	PGRC1_HUMAN,267.50607,9,2824.9778,5624.259,42493.473,40333.023,4271.4707,750.5966,2425.5183,2915.8943,36589.312,45777.234,2401.8118,2544.6243,9,1,6,18,19,3,2,1,3,16,14,2,1,Carbamidomethylation,21671.154,Membrane-associated progesterone receptor component 1 OS=Homo sapiens OX=9606 GN=PGRMC1 PE=1 SV=3
264,TRUE,Q9BQL6	FERM1_HUMAN,300.99295,18,132.47873,494.6745,15878.464,6470.589,7396.7812,,8250.817,10463.587,27153.854,31603.582,523.19543,1993.19,17,2,1,22,19,18,9,21,19,21,29,5,6,Oxidation (M),77436.78,Fermitin family homolog 1 OS=Homo sapiens OX=9606 GN=FERMT1 PE=1 SV=1
594,TRUE,P35237	SPB6_HUMAN,257.39523,10,659.54095,2327.3208,1973.7515,2439.3145,6531.6885,,5876.3223,5968.9414,6244.974,6226.934,3602.5469,4869.494,10,5,5,7,5,7,3,13,12,7,6,6,11,Oxidation (M),42621.887,Serpin B6 OS=Homo sapiens OX=9606 GN=SERPINB6 PE=1 SV=3
50,TRUE,P35222	CTNB1_HUMAN,467.33386,44,228533.2,372299.97,308963.38,239858.56,173927.47,38598.047,222099.95,367934.94,727486.25,633471,316895.16,388628.44,35,132,148,144,137,103,56,127,148,213,199,138,153,Acetylation (N-term); Oxidation (M); Carbamidomethylation,85496.58,Catenin beta-1 OS=Homo sapiens OX=9606 GN=CTNNB1 PE=1 SV=1
1243,TRUE,P28908	TNR8_HUMAN,127.57279,3,,432.2353,,117.78488,281.78455,,3438.4377,6438.6826,5283.6694,6546.4297,2766.1206,4293.601,3,1,1,,1,2,1,8,7,4,4,9,8,,63747.215,Tumor necrosis factor receptor superfamily member 8 OS=Homo sapiens OX=9606 GN=TNFRSF8 PE=1 SV=1
110,TRUE,O94973	AP2A2_HUMAN,399.91147,35,165.61906,1158.5027,45383.617,29776.086,12465.515,64.116165,9189.601,22043.752,44151.05,37249.855,,142.23218,28,14,17,63,60,39,26,36,44,45,45,6,9,Oxidation (M); Carbamidomethylation,103960.414,AP-2 complex subunit alpha-2 OS=Homo sapiens OX=9606 GN=AP2A2 PE=1 SV=2
322,TRUE,P21281	VATB2_HUMAN,305.8381,17,252.00995,2219.6682,24899.338,19400.965,1340.866,,376.449,819.7552,21546.025,21210.586,1995.6826,1649.7493,17,2,7,28,27,2,1,2,5,22,20,6,2,Carbamidomethylation; Acetylation (N-term); Oxidation (M),56500.727,"V-type proton ATPase subunit B, brain isoform OS=Homo sapiens OX=9606 GN=ATP6V1B2 PE=1 SV=3"
928,TRUE,P53680	AP2S1_HUMAN,172.04422,4,1765.2578,2010.1464,22215.047,11876.502,7262.135,577.5355,5689.121,9658.102,14915.469,11641.477,427.51648,1409.762,4,3,2,10,12,4,5,9,7,8,8,2,2,Oxidation (M),17017.697,AP-2 complex subunit sigma OS=Homo sapiens OX=9606 GN=AP2S1 PE=1 SV=2
926,TRUE,Q9UNN5	FAF1_HUMAN,148.731,5,,,210.82681,506.0282,967.0958,,811.58435,1184.779,1287.3289,501.1143,,,5,,,2,5,5,1,5,3,4,3,,,Oxidation (M),73954.12,FAS-associated factor 1 OS=Homo sapiens OX=9606 GN=FAF1 PE=1 SV=2
1432,TRUE,Q3MJ16	PA24E_HUMAN,89.27352,2,,,,,,,,,,,,,2,,,,1,2,,,,,,,,,99190.22,Cytosolic phospholipase A2 epsilon OS=Homo sapiens OX=9606 GN=PLA2G4E PE=1 SV=4
847,TRUE,P43003	EAA1_HUMAN,195.10927,6,336.4343,,3337.4294,2624.503,8314.032,1056.8853,6150.421,5773.408,1662.7358,1219.0006,318.51883,1413.522,5,3,1,3,7,11,4,7,8,7,7,3,2,Carbamidomethylation; Oxidation (M),59572.31,Excitatory amino acid transporter 1 OS=Homo sapiens OX=9606 GN=SLC1A3 PE=1 SV=1
832,TRUE,Q9UKA4	AKA11_HUMAN,192.61133,6,,,508.48538,79.44036,,,,,666.41284,888.463,,,6,,2,4,1,,,,,5,4,,,Oxidation (M),210512.22,A-kinase anchor protein 11 OS=Homo sapiens OX=9606 GN=AKAP11 PE=1 SV=1
317,TRUE,Q96I99	SUCB2_HUMAN,273.28574,16,1771.0637,5185.005,13663.913,8227.199,25035.787,1900.8274,12332.85,23346.88,9269.868,9056.819,4974.516,6265.227,16,12,14,20,18,25,17,20,19,20,16,16,13,Oxidation (M),46510.613,"Succinate--CoA ligase [GDP-forming] subunit beta, mitochondrial OS=Homo sapiens OX=9606 GN=SUCLG2 PE=1 SV=2"
37,TRUE,P35221	CTNA1_HUMAN,514.252,60,366135.03,690865.6,711772.1,584887.94,477733.16,119155.79,463878.34,670820.44,1206403.5,1230391.2,452196.25,595498.8,49,147,156,169,183,156,89,153,156,210,225,154,142,Carbamidomethylation; Oxidation (M); Acetylation (N-term),100071.266,Catenin alpha-1 OS=Homo sapiens OX=9606 GN=CTNNA1 PE=1 SV=1
1050,TRUE,Q16563	SYPL1_HUMAN,144.25572,4,1092.247,2777.6853,15918.439,8692.668,32848.62,6302.0938,9886.327,20757.406,7515.536,14752.289,884.90704,1098.617,4,5,2,9,9,19,6,14,9,6,6,1,1,Carbamidomethylation; Acetylation (N-term),28565.277,Synaptophysin-like protein 1 OS=Homo sapiens OX=9606 GN=SYPL1 PE=1 SV=1
1429,TRUE,P08138	TNR16_HUMAN,84.23122,2,217.47733,250.21333,,,226.95528,,,,,,,,2,3,2,,,3,,,,,,,,,45183.43,Tumor necrosis factor receptor superfamily member 16 OS=Homo sapiens OX=9606 GN=NGFR PE=1 SV=1
329,TRUE,Q92673	SORL_HUMAN,234.52899,18,174.19482,4703.47,33022.77,1084.6663,10450.251,,4289.6147,7736.8013,29628.209,29871.062,2719.0522,2905.2456,18,4,12,8,5,22,4,5,11,6,9,8,6,Oxidation (M),248426.36,Sortilin-related receptor OS=Homo sapiens OX=9606 GN=SORL1 PE=1 SV=2
1029,TRUE,P27361	MK03_HUMAN,189.23723,5,,,1021.36676,662.51483,243.8239,,,,954.76337,1048.8546,,,2,,1,5,5,4,,1,1,5,4,2,3,Carbamidomethylation,43135.57,Mitogen-activated protein kinase 3 OS=Homo sapiens OX=9606 GN=MAPK3 PE=1 SV=4
565,TRUE,Q8TCT9	HM13_HUMAN,259.7697,10,11699.3955,20113.66,174325.5,122152.31,103293.34,22507.46,20209.188,32466.438,74719.59,72323.12,5716.209,8645.096,10,20,20,39,35,34,24,18,19,31,35,15,14,Oxidation (M); Carbamidomethylation,41488.336,Minor histocompatibility antigen H13 OS=Homo sapiens OX=9606 GN=HM13 PE=1 SV=1
883,TRUE,Q13671	RIN1_HUMAN,213.76302,6,410.1655,1646.7416,2376.3855,2621.6733,1012.58704,,226.32973,,5114.971,3770.8235,819.48895,997.38995,6,9,7,7,6,6,3,1,1,6,5,4,4,Carbamidomethylation,84098.9,Ras and Rab interactor 1 OS=Homo sapiens OX=9606 GN=RIN1 PE=1 SV=4
816,TRUE,P02511	CRYAB_HUMAN,156.35861,5,1110.1711,2376.0708,5292.051,3439.6514,1122.9155,,270.06866,700.6969,1654.2244,4126.4824,842.8464,1114.133,5,4,4,4,5,4,,1,3,3,6,2,2,Oxidation (M); Acetylation (N-term),20158.904,Alpha-crystallin B chain OS=Homo sapiens OX=9606 GN=CRYAB PE=1 SV=2
1022,TRUE,Q96MU7	YTDC1_HUMAN,161.5185,5,,,2032.0759,3794.6895,,,,,1637.3049,3915.9814,,444.11008,5,1,4,3,5,,,,,4,4,1,5,,84700.33,YTH domain-containing protein 1 OS=Homo sapiens OX=9606 GN=YTHDC1 PE=1 SV=3
27,TRUE,P13647	K2C5_HUMAN,474.30557,75,377157.72,540858.5,1142520.2,989411.4,305824.66,84648.47,598403.6,774216.94,2117018.2,2166619.5,668297.56,816809.75,54,128,156,206,179,111,87,166,199,282,287,177,197,Oxidation (M); Carbamidomethylation; Acetylation (N-term),62378.34,"Keratin, type II cytoskeletal 5 OS=Homo sapiens OX=9606 GN=KRT5 PE=1 SV=3"
622,TRUE,Q5VWQ8	DAB2P_HUMAN,213.22136,10,548.0794,1976.1638,4635.791,3122.8618,915.61707,,545.8018,2131.0264,4658.198,7209.7964,1264.4783,1810.175,10,1,8,6,12,5,,2,6,12,13,5,5,Oxidation (M),131625.3,Disabled homolog 2-interacting protein OS=Homo sapiens OX=9606 GN=DAB2IP PE=1 SV=2
169,TRUE,Q8IWT6	LRC8A_HUMAN,385.0367,29,71495.27,129499.28,59381.773,35704.582,104150.39,18968.361,71185.36,114835.516,52421.812,65896.63,72535.516,104875.85,27,61,69,39,39,55,34,46,64,41,41,48,56,Carbamidomethylation; Oxidation (M),94198.734,Volume-regulated anion channel subunit LRRC8A OS=Homo sapiens OX=9606 GN=LRRC8A PE=1 SV=1
887,TRUE,Q8NCM8	DYHC2_HUMAN,151.9954,6,,,1139.3755,5827.8477,,,,,1670.5355,1534.2189,,,6,1,,1,3,,,,,4,3,,,,492621.9,Cytoplasmic dynein 2 heavy chain 1 OS=Homo sapiens OX=9606 GN=DYNC2H1 PE=1 SV=4
536,TRUE,O75122	CLAP2_HUMAN,234.80661,11,473.5653,130.56216,3183.0488,903.26306,540.6526,,701.0383,361.80423,2694.3782,2302.9805,527.31396,822.7103,11,4,3,8,5,2,2,2,3,9,10,4,4,Oxidation (M); Carbamidomethylation,141063.66,CLIP-associating protein 2 OS=Homo sapiens OX=9606 GN=CLASP2 PE=1 SV=3
553,TRUE,P23378	GCSP_HUMAN,230.2016,11,,,,,406.73175,,3235.7273,1865.899,858.1659,652.9918,,,11,,,1,1,8,2,6,6,2,4,,,Oxidation (M); Carbamidomethylation,112729.766,"Glycine dehydrogenase (decarboxylating), mitochondrial OS=Homo sapiens OX=9606 GN=GLDC PE=1 SV=2"
968,TRUE,O95630	STABP_HUMAN,119.07266,5,,,1109.2771,268.6696,230.66489,,,680.641,1099.6543,1371.1597,,149.44453,5,,,5,3,1,,1,1,3,3,,1,Carbamidomethylation; Oxidation (M),48076.887,STAM-binding protein OS=Homo sapiens OX=9606 GN=STAMBP PE=1 SV=1
265,TRUE,P06744	G6PI_HUMAN,325.97183,16,320.67087,1204.4438,113283.22,98648.05,12913.173,365.50024,12426.932,25080.736,210662.88,197991.8,2276.9922,3549.5786,16,4,6,44,50,12,11,16,25,47,50,7,9,Acetylation (N-term); Oxidation (M); Carbamidomethylation,63147.12,Glucose-6-phosphate isomerase OS=Homo sapiens OX=9606 GN=GPI PE=1 SV=4
518,TRUE,Q14108	SCRB2_HUMAN,237.91325,11,,163.92464,6316.815,4103.502,27059.871,4982.665,8621.002,18817.574,7951.8623,6765.1387,,,11,,1,12,7,28,13,11,17,9,13,,,Carbamidomethylation; Oxidation (M),54290.156,Lysosome membrane protein 2 OS=Homo sapiens OX=9606 GN=SCARB2 PE=1 SV=2
1014,TRUE,P01040	CYTA_HUMAN,168.61043,5,358.26825,1350.8606,22572.076,13696.785,2399.6973,,1056.4595,2639.623,,1432.3563,148.31723,,5,4,3,10,5,4,3,4,5,7,5,2,3,,11006.488,Cystatin-A OS=Homo sapiens OX=9606 GN=CSTA PE=1 SV=1
1401,TRUE,O60779	S19A2_HUMAN,103.36686,2,,226.35062,,,,,,743.4131,,,583.9784,729.84125,2,,1,,,1,,3,2,,,3,1,,55400.074,Thiamine transporter 1 OS=Homo sapiens OX=9606 GN=SLC19A2 PE=1 SV=2
1009,TRUE,P26012	ITB8_HUMAN,199.32301,5,2778.5762,8918.353,2347.133,1434.2189,5616.1562,,4237.5312,15091.959,2863.6929,5183.3,6835.41,7178.4805,5,6,5,4,4,8,4,5,5,6,6,7,7,Oxidation (M),85631.86,Integrin beta-8 OS=Homo sapiens OX=9606 GN=ITGB8 PE=1 SV=1
141,TRUE,Q02952	AKA12_HUMAN,363.93762,34,,621.2518,855.7583,166.75482,3108.8413,,1514.0632,2587.177,18434.45,19366.703,4915.648,7186.015,34,,6,7,6,3,,7,18,42,44,22,27,Carbamidomethylation; Oxidation (M),191481.78,A-kinase anchor protein 12 OS=Homo sapiens OX=9606 GN=AKAP12 PE=1 SV=4
16,FALSE,A0AVI2	FR1L5_HUMAN,106.94678,2,1413.6499,2306.6624,11067.909,7874.271,,,,2822.975,15884.049,13806.414,1148.4397,1786.7032,2,1,2,1,1,,1,,1,4,5,2,4,,237934.83,Fer-1-like protein 5 OS=Homo sapiens OX=9606 GN=FER1L5 PE=2 SV=3
965,TRUE,Q9NRD9	DUOX1_HUMAN,147.2064,5,,,1821.6202,791.26276,1387.9523,,,240.83635,,,,,5,,,5,3,5,,,1,1,,,,,177235.08,Dual oxidase 1 OS=Homo sapiens OX=9606 GN=DUOX1 PE=1 SV=1
349,TRUE,P40763	STAT3_HUMAN,300.15628,16,435.8107,1049.7034,6506.9507,4102.8843,1872.2483,,,1270.5913,6764.895,9934.1,840.6619,588.1401,16,6,12,31,14,13,2,4,11,30,21,5,7,Carbamidomethylation; Oxidation (M),88067.79,Signal transducer and activator of transcription 3 OS=Homo sapiens OX=9606 GN=STAT3 PE=1 SV=2
1389,TRUE,P30838	AL3A1_HUMAN,103.2532,2,253.46176,1105.2303,5998.7188,5670.4043,946.30597,,428.22998,1119.0944,9292.142,8370.148,179.54988,602.61255,2,1,1,1,2,1,1,1,1,3,2,1,2,,50394.953,"Aldehyde dehydrogenase, dimeric NADP-preferring OS=Homo sapiens OX=9606 GN=ALDH3A1 PE=1 SV=3"
1078,TRUE,P51790	CLCN3_HUMAN,111.70618,4,,,1365.2792,786.8662,220.26202,,,,1034.4409,,,,4,,,3,3,2,,,,2,,,,Oxidation (M); Acetylation (N-term),90966.234,H(+)/Cl(-) exchange transporter 3 OS=Homo sapiens OX=9606 GN=CLCN3 PE=1 SV=2
994,TRUE,Q9NZM3	ITSN2_HUMAN,160.35385,5,,,550.9182,102.1913,,,,,2241.5664,2382.3408,,,5,,,6,5,1,,,,5,5,,,Oxidation (M),193461.45,Intersectin-2 OS=Homo sapiens OX=9606 GN=ITSN2 PE=1 SV=3
435,TRUE,P42356	PI4KA_HUMAN,239.78412,15,,905.255,303.6717,,237.9403,619.8895,,799.8921,814.9136,285.58487,,193.05011,15,1,9,7,3,9,1,2,6,4,7,2,2,Oxidation (M); Carbamidomethylation,236830.45,Phosphatidylinositol 4-kinase alpha OS=Homo sapiens OX=9606 GN=PI4KA PE=1 SV=4
637,TRUE,Q96RF0	SNX18_HUMAN,236.88696,10,3628.2222,4596.0337,1040.6024,444.2843,1236.7778,,94.915955,398.35614,574.92004,399.0677,,978.22156,10,13,13,3,5,3,1,3,2,1,3,2,2,Oxidation (M),68894.43,Sorting nexin-18 OS=Homo sapiens OX=9606 GN=SNX18 PE=1 SV=2
321,TRUE,Q14254	FLOT2_HUMAN,271.88635,16,1974.5857,4119.993,34156.75,28065.303,10827.476,769.29626,3973.233,8084.8,27894.62,31920.635,5223.053,5695.7876,16,6,8,23,29,16,15,20,15,22,28,18,13,Carbamidomethylation; Oxidation (M),47064.16,Flotillin-2 OS=Homo sapiens OX=9606 GN=FLOT2 PE=1 SV=2
610,TRUE,O95292	VAPB_HUMAN,251.13469,10,14262.5205,34731.09,165228.2,122901.83,34831.594,3158.9924,13759.563,26714.766,120689.8,119041.62,11775.657,20473.404,8,20,13,32,31,24,18,15,15,35,31,12,13,Acetylation (N-term); Carbamidomethylation; Oxidation (M),27228.387,Vesicle-associated membrane protein-associated protein B/C OS=Homo sapiens OX=9606 GN=VAPB PE=1 SV=3
735,TRUE,P13747	HLAE_HUMAN,239.31287,9,126.93114,530.3055,7728.1055,1753.3762,5835.205,711.1571,122.643166,847.3547,1080.8428,,,343.56705,6,10,10,16,14,17,9,9,13,12,9,8,6,Acetylation (N-term),40057.566,"HLA class I histocompatibility antigen, alpha chain E OS=Homo sapiens OX=9606 GN=HLA-E PE=1 SV=4"
1193,TRUE,Q9BT40	INP5K_HUMAN,106.48924,3,,,694.5312,,,,,,,,,,3,,,4,,,,,,,,,,,51090.332,Inositol polyphosphate 5-phosphatase K OS=Homo sapiens OX=9606 GN=INPP5K PE=1 SV=3
1286,TRUE,Q5D862	FILA2_HUMAN,118.36868,3,199.15363,667.09454,455.8258,341.21375,910.39905,,2889.3281,4831.164,,,875.327,,3,2,4,1,2,3,2,4,4,,,4,4,,248072.58,Filaggrin-2 OS=Homo sapiens OX=9606 GN=FLG2 PE=1 SV=1
225,TRUE,Q15375	EPHA7_HUMAN,357.18845,22,10118.465,21325.182,13409.091,7740.6304,19190.512,1646.4373,6662.0537,13631.183,12930.965,15413.106,7702.0293,9089.063,18,36,38,36,28,34,26,36,33,35,31,30,37,Oxidation (M); Carbamidomethylation,112096.6,Ephrin type-A receptor 7 OS=Homo sapiens OX=9606 GN=EPHA7 PE=1 SV=3
644,TRUE,P20338	RAB4A_HUMAN,219.63911,9,,257.49084,9031.877,7669.051,,,,,455.87067,339.24185,,,7,10,12,21,24,8,7,4,7,13,16,9,5,Oxidation (M); Carbamidomethylation,24389.639,Ras-related protein Rab-4A OS=Homo sapiens OX=9606 GN=RAB4A PE=1 SV=3
101,TRUE,O95782	AP2A1_HUMAN,395.353,35,3225.0679,8870.2295,124216.62,107402.49,29717.455,1209.9138,16106.352,28927.578,59079.57,59240.008,490.19656,137.2129,28,18,31,96,96,55,31,46,53,65,58,6,10,Carbamidomethylation; Oxidation (M),107545.88,AP-2 complex subunit alpha-1 OS=Homo sapiens OX=9606 GN=AP2A1 PE=1 SV=3
1100,TRUE,Q5T9L3	WLS_HUMAN,132.8161,4,,,4318.465,2936.9055,,,,,2546.4604,3020.7559,,,4,,2,4,4,,,,,2,2,1,,Carbamidomethylation,62253.215,Protein wntless homolog OS=Homo sapiens OX=9606 GN=WLS PE=1 SV=2
897,TRUE,O43493	TGON2_HUMAN,174.98082,6,,,1255.102,763.7361,4219.0166,,572.91425,1490.6898,938.5918,778.178,,,6,,,2,2,9,1,2,4,1,3,,,,45879.57,Trans-Golgi network integral membrane protein 2 OS=Homo sapiens OX=9606 GN=TGOLN2 PE=1 SV=4
358,TRUE,P36873	PP1G_HUMAN,331.7767,16,416.77597,,3205.8313,2343.7686,1562.3339,,929.6116,,4998.1113,5050.131,,,2,8,10,35,29,19,10,17,15,25,26,4,4,Carbamidomethylation; Oxidation (M),36983.785,Serine/threonine-protein phosphatase PP1-gamma catalytic subunit OS=Homo sapiens OX=9606 GN=PPP1CC PE=1 SV=1
1222,TRUE,P07204	TRBM_HUMAN,147.69855,3,570.4138,3402.816,1595.0795,,2333.1177,,3706.5864,8930.057,23684.895,20398.752,2292.5527,1187.1716,3,3,6,2,2,4,2,4,4,8,5,3,3,Carbamidomethylation,60329.375,Thrombomodulin OS=Homo sapiens OX=9606 GN=THBD PE=1 SV=2
1137,TRUE,P51828	ADCY7_HUMAN,139.25826,4,,,,,,,236.45804,501.91534,,,,,4,,,,1,2,1,2,6,,,,,Oxidation (M),120308.32,Adenylate cyclase type 7 OS=Homo sapiens OX=9606 GN=ADCY7 PE=1 SV=1
1237,TRUE,Q08722	CD47_HUMAN,108.65391,3,1779.0931,3741.032,9852.966,8467.536,24147.342,8012.229,12147.976,21456.344,10915.914,11569.7,3165.336,4847.1006,3,1,1,7,6,5,5,6,5,4,3,2,2,,35213.637,Leukocyte surface antigen CD47 OS=Homo sapiens OX=9606 GN=CD47 PE=1 SV=1
1003,TRUE,P51809	VAMP7_HUMAN,145.4798,4,,,6426.0786,3935.999,,,,,2084.273,1896.0016,,,4,,,8,3,2,,,,4,5,,,Carbamidomethylation; Oxidation (M),24935.057,Vesicle-associated membrane protein 7 OS=Homo sapiens OX=9606 GN=VAMP7 PE=1 SV=3
234,TRUE,Q6P1M0	S27A4_HUMAN,308.93057,20,4085.014,11010.392,68372.055,40427.707,14175.005,999.0375,2721.3691,6036.7676,17807.418,28702.29,3033.2236,7793.3223,18,20,20,55,39,29,22,8,11,27,28,10,8,Oxidation (M); Carbamidomethylation,72064.24,Long-chain fatty acid transport protein 4 OS=Homo sapiens OX=9606 GN=SLC27A4 PE=1 SV=1
1183,TRUE,Q6Q0C0	TRAF7_HUMAN,92.06816,3,229.91577,288.39816,,,,,,,,,,,3,1,3,,,1,,,,,,,,,74609.16,E3 ubiquitin-protein ligase TRAF7 OS=Homo sapiens OX=9606 GN=TRAF7 PE=1 SV=1
982,TRUE,Q9Y6W5	WASF2_HUMAN,229.7518,5,,1121.0752,4066.3892,1494.998,5304.5283,,1471.505,3842.9907,5630.4287,3170.1858,,,5,1,4,5,5,4,1,6,5,5,5,2,,Carbamidomethylation,54284.035,Wiskott-Aldrich syndrome protein family member 2 OS=Homo sapiens OX=9606 GN=WASF2 PE=1 SV=3
643,FALSE,Q8NER5	ACV1C_HUMAN,108.09927,2,1370.3032,1568.8062,1237.4824,718.93256,1912.1543,,,1351.6594,,11267.751,,,2,2,3,3,1,3,3,2,4,2,4,1,1,Oxidation (M),54870.79,Activin receptor type-1C OS=Homo sapiens OX=9606 GN=ACVR1C PE=1 SV=1
1346,TRUE,P30411	BKRB2_HUMAN,84.27563,2,,268.98108,,,352.94604,,,,,,,353.93,2,1,1,,,1,,,,,,,1,Oxidation (M),44460.566,B2 bradykinin receptor OS=Homo sapiens OX=9606 GN=BDKRB2 PE=1 SV=2
624,TRUE,Q9Y4D1	DAAM1_HUMAN,203.66525,10,209.16464,1375.2119,2496.4492,661.41675,3738.6494,,990.3226,2545.2913,2178.547,2643.506,,,10,2,7,8,11,12,,4,10,9,6,1,,Oxidation (M),123473.45,Disheveled-associated activator of morphogenesis 1 OS=Homo sapiens OX=9606 GN=DAAM1 PE=1 SV=2
569,TRUE,Q9HCM4	E41L5_HUMAN,230.20802,9,675.4574,3302.265,1553.1265,1484.2244,5577.2837,,221.12817,3695.1765,2008.6128,2856.3801,503.26202,332.625,7,7,11,10,9,16,5,8,17,8,8,4,4,Oxidation (M),81856.19,Band 4.1-like protein 5 OS=Homo sapiens OX=9606 GN=EPB41L5 PE=1 SV=3
909,TRUE,Q15599	NHRF2_HUMAN,185.85838,6,,,,,1325.5234,,832.96924,1576.2906,,269.7142,,,6,,,,,9,4,10,10,1,2,,,,37413.76,Na(+)/H(+) exchange regulatory cofactor NHE-RF2 OS=Homo sapiens OX=9606 GN=SLC9A3R2 PE=1 SV=2
1037,TRUE,Q5HYA8	MKS3_HUMAN,127.21915,4,,,525.6202,180.45619,1004.19006,,1447.9241,1653.4686,1706.9824,1127.8225,263.14105,247.43256,4,,,2,1,3,2,3,4,7,3,3,1,Oxidation (M),111744.664,Meckelin OS=Homo sapiens OX=9606 GN=TMEM67 PE=1 SV=2
1232,TRUE,Q9Y2H0	DLGP4_HUMAN,137.7504,3,,109.18132,552.78046,,196.33792,,,,,693.9697,,,3,,2,4,3,2,,,,1,2,,,Oxidation (M),108011.98,Disks large-associated protein 4 OS=Homo sapiens OX=9606 GN=DLGAP4 PE=1 SV=3
1228,TRUE,Q9NV96	CC50A_HUMAN,147.9415,3,,937.63354,1366.112,426.50436,1722.8557,,689.2269,2336.6155,469.5033,1397.1091,874.88666,,3,2,2,4,3,5,,2,1,2,3,1,,Carbamidomethylation,40683.66,Cell cycle control protein 50A OS=Homo sapiens OX=9606 GN=TMEM30A PE=1 SV=1
693,FALSE,P0CG48	UBC_HUMAN,199.14592,5,88056.43,137605.64,271798.94,258485.02,322625.5,142883.31,218658.83,303838.88,318691.06,325820.25,99666.38,124832.11,5,15,16,23,24,22,15,15,21,21,27,16,14,,77038.61,Polyubiquitin-C OS=Homo sapiens OX=9606 GN=UBC PE=1 SV=3
248,TRUE,Q13464	ROCK1_HUMAN,262.98105,22,,,5495.746,3017.6472,1653.1653,,2238.1597,5058.58,6505.0806,4670.137,1134.1448,1622.2976,19,3,3,15,15,17,5,17,22,18,18,13,12,Oxidation (M); Acetylation (N-term); Carbamidomethylation,158174.67,Rho-associated protein kinase 1 OS=Homo sapiens OX=9606 GN=ROCK1 PE=1 SV=1
517,TRUE,Q9UJU6	DBNL_HUMAN,269.52524,12,,677.75146,8202.896,4541.845,4496.536,,1355.5042,6203.4106,9626.438,11005.32,339.99854,1483.8225,12,5,4,10,9,11,4,5,12,15,11,4,3,Carbamidomethylation; Oxidation (M),48207.27,Drebrin-like protein OS=Homo sapiens OX=9606 GN=DBNL PE=1 SV=1
48,TRUE,P33527	MRP1_HUMAN,457.26337,48,1144.2134,3393.9001,34581.863,20491.082,106863.04,13461.213,101813.945,168181.11,118501.734,119406.12,6300.753,7378.6235,46,12,12,79,53,96,64,104,128,103,88,20,24,Oxidation (M); Carbamidomethylation,171591.17,Multidrug resistance-associated protein 1 OS=Homo sapiens OX=9606 GN=ABCC1 PE=1 SV=3
852,TRUE,Q8N3E9	PLCD3_HUMAN,158.59996,7,,338.4531,,500.1079,244.70877,,,,,,,,7,,4,2,2,7,2,,,,,,,Oxidation (M),89258.38,"1-phosphatidylinositol 4,5-bisphosphate phosphodiesterase delta-3 OS=Homo sapiens OX=9606 GN=PLCD3 PE=1 SV=3"
1347,TRUE,Q9HCJ1	ANKH_HUMAN,92.70399,2,,,,,,,,,,,,,2,,,3,1,2,,1,1,1,,,,,54240.96,Progressive ankylosis protein homolog OS=Homo sapiens OX=9606 GN=ANKH PE=1 SV=2
625,TRUE,P62491	RB11A_HUMAN,223.84335,9,24564.188,36613.258,236739.88,193769.28,25765.791,4246.8643,9430.375,13077.934,136999.78,128572.43,14948.73,15075.483,9,12,13,30,25,12,8,6,10,23,23,10,9,Oxidation (M); Acetylation (N-term),24393.518,Ras-related protein Rab-11A OS=Homo sapiens OX=9606 GN=RAB11A PE=1 SV=3
841,TRUE,Q9NUT2	MITOS_HUMAN,196.2665,7,,,1267.833,388.9268,,,,,2079.8823,2062.6296,,,7,,,9,4,,,,,4,8,,2,,79988.836,Mitochondrial potassium channel ATP-binding subunit OS=Homo sapiens OX=9606 GN=ABCB8 PE=1 SV=3
771,TRUE,O43570	CAH12_HUMAN,221.56061,7,4555.302,12053.275,6372.412,1645.7186,20816.332,1329.6503,16782.473,41847.543,5574.6816,6090.2007,11133.299,20844.205,7,13,10,4,2,12,6,15,18,4,5,10,15,Oxidation (M),39450.93,Carbonic anhydrase 12 OS=Homo sapiens OX=9606 GN=CA12 PE=1 SV=1
1388,TRUE,Q9Y5V3	MAGD1_HUMAN,100.5152,2,,505.87512,591.81195,361.56958,,,,272.4491,1286.723,783.67615,582.8765,,2,,3,3,3,,,,1,3,4,1,,,86160.92,Melanoma-associated antigen D1 OS=Homo sapiens OX=9606 GN=MAGED1 PE=1 SV=3
796,TRUE,O43520	AT8B1_HUMAN,171.89915,8,,,,,1798.8796,,1163.9237,1618.1106,,,,994.96533,8,1,,,1,4,2,1,8,,,1,2,Oxidation (M),143695.44,Phospholipid-transporting ATPase IC OS=Homo sapiens OX=9606 GN=ATP8B1 PE=1 SV=3
620,TRUE,Q9Y6N7	ROBO1_HUMAN,214.31693,11,,,,,,,1211.5657,2863.6448,,349.49762,649.2223,2642.6445,11,,1,,,,,11,7,3,3,11,10,,180929.64,Roundabout homolog 1 OS=Homo sapiens OX=9606 GN=ROBO1 PE=1 SV=1
1270,TRUE,P25116	PAR1_HUMAN,106.07733,2,,,240.67618,,,,,,448.65256,222.18883,,,2,1,1,3,1,1,,,,2,2,,,Oxidation (M); Carbamidomethylation,47440.5,Proteinase-activated receptor 1 OS=Homo sapiens OX=9606 GN=F2R PE=1 SV=2
687,TRUE,Q6P1M3	L2GL2_HUMAN,222.20953,9,,,4398.211,4086.7854,6218.822,203.78854,1311.0447,3267.6138,1099.7097,1243.3435,,140.89111,9,1,1,9,13,12,7,11,9,3,2,,1,Carbamidomethylation; Oxidation (M),113447.945,LLGL scribble cell polarity complex component 2 OS=Homo sapiens OX=9606 GN=LLGL2 PE=1 SV=2
174,TRUE,P35232	PHB_HUMAN,403.2102,31,9063.002,29870.092,751869.9,631296,124889.234,31443.236,105673.85,153312.92,713295.2,820310.56,19246.836,28472.504,31,17,21,146,129,37,35,40,42,152,148,19,18,Carbamidomethylation,29804.098,Prohibitin OS=Homo sapiens OX=9606 GN=PHB PE=1 SV=1
491,TRUE,Q14141	SEPT6_HUMAN,267.6627,12,,392.53918,12727.791,11016.261,2034.056,,2351.359,3055.3198,23166.262,27019.105,1715.8287,1611.1365,11,4,4,14,22,11,3,12,11,17,19,13,6,Oxidation (M),49716.645,Septin-6 OS=Homo sapiens OX=9606 GN=SEPTIN6 PE=1 SV=4
1383,TRUE,P07711	CATL1_HUMAN,87.23297,2,,,,,,,,,1483.6338,740.081,,,2,,,,,,,,,4,1,,,Carbamidomethylation,37564.125,Procathepsin L OS=Homo sapiens OX=9606 GN=CTSL PE=1 SV=2
143,TRUE,Q99959	PKP2_HUMAN,351.32886,27,6623.279,17090.62,18694.098,16299.166,7462.04,,11664.102,24361.164,62147.133,54576.023,15270.49,19951.684,27,21,31,29,21,23,10,30,36,53,53,29,27,Oxidation (M); Carbamidomethylation,97414.85,Plakophilin-2 OS=Homo sapiens OX=9606 GN=PKP2 PE=1 SV=2
1405,TRUE,Q96JW4	S41A2_HUMAN,95.83941,2,,,,,,,,,,,,,2,,,3,,,,,,,,,1,Acetylation (N-term); Carbamidomethylation,62473.195,Solute carrier family 41 member 2 OS=Homo sapiens OX=9606 GN=SLC41A2 PE=1 SV=2
538,TRUE,P10620	MGST1_HUMAN,209.99881,5,12327.529,27405.25,202779.52,175411.6,12244.871,910.18195,5197.1846,11554.961,117177.625,138122.1,14180.129,16278.43,5,20,18,31,34,12,6,14,15,26,30,14,13,Oxidation (M); Carbamidomethylation,17598.658,Microsomal glutathione S-transferase 1 OS=Homo sapiens OX=9606 GN=MGST1 PE=1 SV=1
999,TRUE,Q8TF46	DI3L1_HUMAN,125.07321,5,,421.2537,,,,,,,655.26215,,558.6322,390.3402,5,,2,,,,,,,3,2,3,2,,120787.45,DIS3-like exonuclease 1 OS=Homo sapiens OX=9606 GN=DIS3L PE=1 SV=2
388,TRUE,Q8NI35	INADL_HUMAN,270.0951,17,,1493.1311,3365.2034,1764.5227,1606.7784,,,586.81024,1547.9961,4398.097,65.759445,595.2422,17,5,9,21,14,11,3,3,5,10,10,3,7,,196368.1,InaD-like protein OS=Homo sapiens OX=9606 GN=PATJ PE=1 SV=3
839,TRUE,P02787	TRFE_HUMAN,153.0692,6,,122.6192,,630.9042,2440.7017,,750.7856,972.0489,,757.1277,,,6,,1,1,2,8,4,2,5,2,2,,,Oxidation (M),77063.89,Serotransferrin OS=Homo sapiens OX=9606 GN=TF PE=1 SV=3
1255,TRUE,Q5TZA2	CROCC_HUMAN,105.61812,3,,,,,,,,,177.51123,,,,3,,1,,1,,,,,3,1,,,,228523.33,Rootletin OS=Homo sapiens OX=9606 GN=CROCC PE=1 SV=1
453,TRUE,Q9BZQ8	NIBA1_HUMAN,276.40622,14,,1148.4011,3439.8896,592.00385,7531.8135,314.13416,704.1563,3030.893,2326.4185,3723.8994,120.083435,613.22974,14,1,7,14,8,17,5,7,6,5,8,5,7,Carbamidomethylation; Oxidation (M),103134.68,Protein Niban 1 OS=Homo sapiens OX=9606 GN=NIBAN1 PE=1 SV=1
1097,TRUE,Q8IW52	SLIK4_HUMAN,142.14577,4,,,,,183.94179,,202.7802,715.94135,,,,,4,,,,,1,,1,5,3,1,1,,,94331,SLIT and NTRK-like protein 4 OS=Homo sapiens OX=9606 GN=SLITRK4 PE=1 SV=1
6,TRUE,Q9UPN3	MACF1_HUMAN,525.4067,156,819.3109,7168.524,80743.734,46833.234,21619.05,,12857.777,45208.375,126861.94,139464.58,5964.013,8919.466,151,29,47,142,147,89,17,89,97,169,180,46,49,Oxidation (M); Carbamidomethylation; Acetylation (N-term),838307.6,"Microtubule-actin cross-linking factor 1, isoforms 1/2/3/5 OS=Homo sapiens OX=9606 GN=MACF1 PE=1 SV=4"
723,TRUE,P07858	CATB_HUMAN,237.49284,7,,,4363.557,1720.7034,121.94082,,,317.29974,7633.9565,4172.295,58.978752,195.3589,7,,2,9,6,3,,1,3,10,8,2,1,Carbamidomethylation; Oxidation (M),37821.58,Cathepsin B OS=Homo sapiens OX=9606 GN=CTSB PE=1 SV=3
800,TRUE,O14786	NRP1_HUMAN,235.37277,8,2439.3008,3930.1685,332.341,962.8131,4755.743,200.16447,1447.6371,3698.4272,2123.2402,2511.8726,1170.5712,2146.1853,8,7,8,4,7,10,6,6,5,4,8,3,4,,103134.336,Neuropilin-1 OS=Homo sapiens OX=9606 GN=NRP1 PE=1 SV=3
758,TRUE,P04920	B3A2_HUMAN,168.25116,7,,,,,831.9818,,317.43353,1056.8701,694.4785,423.48657,,,7,,1,,1,3,,3,8,3,1,,,Oxidation (M),137009.31,Anion exchange protein 2 OS=Homo sapiens OX=9606 GN=SLC4A2 PE=1 SV=4
943,TRUE,Q86SQ4	AGRG6_HUMAN,182.94495,5,87.60832,1203.5449,327.2128,,1039.8955,,344.5875,2232.3853,1596.6486,1315.5155,850.56964,1088.3651,5,2,6,2,1,4,3,3,7,3,3,6,6,Oxidation (M),136694.61,Adhesion G-protein coupled receptor G6 OS=Homo sapiens OX=9606 GN=ADGRG6 PE=1 SV=3
629,TRUE,P61020	RAB5B_HUMAN,253.01553,8,2694.8682,34937.453,42244.695,30570.23,7445.212,667.7751,17029.088,1228.501,9368.963,12595.17,23045.605,1870.4036,5,16,17,22,22,21,11,11,19,22,24,8,6,Oxidation (M),23706.803,Ras-related protein Rab-5B OS=Homo sapiens OX=9606 GN=RAB5B PE=1 SV=1
301,TRUE,Q13616	CUL1_HUMAN,288.92255,18,,482.49744,6779.043,2175.8638,1000.7947,,612.63043,3133.404,10773.964,12555.194,,,18,1,6,10,9,4,1,6,10,21,16,,4,Oxidation (M); Carbamidomethylation,89678.52,Cullin-1 OS=Homo sapiens OX=9606 GN=CUL1 PE=1 SV=2
711,FALSE,Q309B1	TR16L_HUMAN,165.05205,5,,,,,187.49863,,,380.4224,1511.7167,595.09875,,,5,,,3,2,3,,3,3,7,4,1,,Oxidation (M),40305.766,Tripartite motif-containing protein 16-like protein OS=Homo sapiens OX=9606 GN=TRIM16L PE=2 SV=3
20,TRUE,Q00610	CLH1_HUMAN,534.9478,87,49781.746,104704.484,437957.6,362720.22,92972.43,16267.386,99506.91,180462.84,651973.3,651736.9,57794.01,69898.83,68,100,128,249,224,119,60,124,139,238,242,85,90,Oxidation (M); Carbamidomethylation,191614.62,Clathrin heavy chain 1 OS=Homo sapiens OX=9606 GN=CLTC PE=1 SV=5
1213,TRUE,P14174	MIF_HUMAN,94.300644,2,,,7532.8965,7228.0938,586.90344,,402.20108,5190.1313,32780.938,32059.55,,,2,,,3,5,1,,3,5,7,7,,,Carbamidomethylation; Oxidation (M),12476.295,Macrophage migration inhibitory factor OS=Homo sapiens OX=9606 GN=MIF PE=1 SV=4
1148,TRUE,Q9Y5I4	PCDC2_HUMAN,151.06381,4,,306.72067,,,,,,,249.97333,115.59206,,227.15155,4,2,1,,,1,,1,3,3,3,1,2,,109450.08,Protocadherin alpha-C2 OS=Homo sapiens OX=9606 GN=PCDHAC2 PE=2 SV=1
537,TRUE,P11532	DMD_HUMAN,213.58557,9,,,98.57878,,1586.3633,,472.19626,696.3487,319.23346,562.2131,,,5,,4,3,1,13,1,10,11,4,7,3,4,Oxidation (M),426749.62,Dystrophin OS=Homo sapiens OX=9606 GN=DMD PE=1 SV=3
1217,TRUE,O94856	NFASC_HUMAN,140.00407,3,,1140.9927,,,209.71548,,,,95.08344,215.14455,,,3,1,4,2,1,2,,,1,1,1,1,1,,150026.78,Neurofascin OS=Homo sapiens OX=9606 GN=NFASC PE=1 SV=4
710,TRUE,Q13641	TPBG_HUMAN,252.75352,8,19293.225,29175.668,32757.99,29707.826,45290.9,11847.048,47865.684,61596.13,27830.562,46444.293,43016.883,39191.72,8,17,17,17,22,24,19,25,23,17,18,19,24,Carbamidomethylation; Oxidation (M),46031.86,Trophoblast glycoprotein OS=Homo sapiens OX=9606 GN=TPBG PE=1 SV=1
918,TRUE,Q9UHX3	AGRE2_HUMAN,178.79688,4,,,,,,,2463.071,5517.376,3702.7778,3682.0676,2525.0688,3264.2258,4,2,2,,,1,1,5,7,4,11,4,7,Oxidation (M),90471.87,Adhesion G protein-coupled receptor E2 OS=Homo sapiens OX=9606 GN=ADGRE2 PE=1 SV=2
1275,TRUE,P37840	SYUA_HUMAN,178.26215,3,,,214.27417,232.82172,,,,,2339.832,2282.7744,622.0648,1306.9869,3,2,2,1,1,,,,,3,3,2,3,,14460.151,Alpha-synuclein OS=Homo sapiens OX=9606 GN=SNCA PE=1 SV=1
1366,TRUE,P18510	IL1RA_HUMAN,117.24686,2,,,,,383.8069,,,,,,,,2,,,1,3,3,,,,,,,,,20054.988,Interleukin-1 receptor antagonist protein OS=Homo sapiens OX=9606 GN=IL1RN PE=1 SV=1
128,TRUE,P46939	UTRO_HUMAN,318.6474,34,,296.94876,180.23497,,198.73016,,841.21326,3210.746,3992.4429,2437.925,832.8139,1731.067,30,1,9,6,2,7,,15,29,25,23,11,15,Oxidation (M),394466.2,Utrophin OS=Homo sapiens OX=9606 GN=UTRN PE=1 SV=2
1145,TRUE,Q9NPR2	SEM4B_HUMAN,119.5751,3,,,1515.9127,1099.8044,1562.5187,,478.58774,,501.18927,227.2079,,,3,,,2,5,2,1,2,,4,2,,,Oxidation (M),92765.95,Semaphorin-4B OS=Homo sapiens OX=9606 GN=SEMA4B PE=1 SV=4
167,TRUE,P08237	PFKAM_HUMAN,349.79877,25,10674.269,25133.566,79035.266,48904.164,16451.12,1089.1597,15700.919,34088.438,81677.555,90598.26,18349.098,30991.428,25,36,32,48,49,28,20,32,38,57,59,36,38,Oxidation (M); Carbamidomethylation; Acetylation (N-term),85182.516,"ATP-dependent 6-phosphofructokinase, muscle type OS=Homo sapiens OX=9606 GN=PFKM PE=1 SV=2"
1411,TRUE,O75581	LRP6_HUMAN,113.912926,2,,120.17043,,,,,,315.04657,,,276.34564,320.92264,2,,1,,,1,,,3,1,3,1,1,,180429.34,Low-density lipoprotein receptor-related protein 6 OS=Homo sapiens OX=9606 GN=LRP6 PE=1 SV=2
1333,TRUE,Q8N370	LAT4_HUMAN,84.24497,2,,,,,666.7111,,174.4126,,,,,,2,,,,,3,,4,1,,,,,,62746.914,Large neutral amino acids transporter small subunit 4 OS=Homo sapiens OX=9606 GN=SLC43A2 PE=1 SV=1
1358,TRUE,Q8IXS6	PALM2_HUMAN,82.24288,2,,,,,,,,,,151.01262,,,2,,,,,,,,,3,1,1,2,,42185.168,Paralemmin-2 OS=Homo sapiens OX=9606 GN=PALM2 PE=1 SV=3
41,TRUE,P68104	EF1A1_HUMAN,496.2128,54,478933.44,854960.8,1404521.4,981127.7,909440.7,219378.3,857899.1,1467204.4,2499034,2454642.2,683626.56,711150,54,121,195,231,193,128,102,181,257,417,350,138,162,Carbamidomethylation; Oxidation (M); Acetylation (N-term),50140.86,Elongation factor 1-alpha 1 OS=Homo sapiens OX=9606 GN=EEF1A1 PE=1 SV=1
282,TRUE,P78310	CXAR_HUMAN,282.00412,14,7246.128,25261.656,7498.687,7098.5273,6982.1436,2933.2583,8563.699,18397.846,19251.178,14710.597,20127.262,18722.504,14,16,23,9,10,14,10,13,22,17,20,33,25,Carbamidomethylation; Oxidation (M),40029.89,Coxsackievirus and adenovirus receptor OS=Homo sapiens OX=9606 GN=CXADR PE=1 SV=1
713,TRUE,P52630	STAT2_HUMAN,186.20483,9,160.13507,916.6467,2682.1326,1191.9838,520.6984,,,,548.20764,1149.253,,,9,3,5,10,6,5,,,1,4,3,,,,97916.234,Signal transducer and activator of transcription 2 OS=Homo sapiens OX=9606 GN=STAT2 PE=1 SV=1
1088,TRUE,O15121	DEGS1_HUMAN,176.75623,3,399.01913,1253.6831,19812.783,9688.628,,,,,10465.182,14273.305,,220.91293,3,3,5,10,10,1,,,,7,8,,1,Oxidation (M),37866.027,Sphingolipid delta(4)-desaturase DES1 OS=Homo sapiens OX=9606 GN=DEGS1 PE=1 SV=1
92,TRUE,Q9BSJ8	ESYT1_HUMAN,428.86502,41,68743.125,159438.06,246909.19,184734.98,89081.56,9117.434,52599.17,86414.64,228206.38,231160.7,55477.35,76489.484,41,74,81,83,84,54,33,49,56,81,81,58,56,Carbamidomethylation; Oxidation (M),122856.445,Extended synaptotagmin-1 OS=Homo sapiens OX=9606 GN=ESYT1 PE=1 SV=1
1265,TRUE,P83881	RL36A_HUMAN,111.87813,3,,,811.78455,,,,,,6363.657,6225.801,456.08926,,3,1,,3,2,,,,1,2,6,1,1,Carbamidomethylation,12440.816,60S ribosomal protein L36a OS=Homo sapiens OX=9606 GN=RPL36A PE=1 SV=2
1258,TRUE,Q00535	CDK5_HUMAN,105.75246,3,,410.33548,,,,,262.02106,347.80374,,,,,3,,2,1,,,,2,5,,1,,,Carbamidomethylation; Oxidation (M),33304.46,Cyclin-dependent-like kinase 5 OS=Homo sapiens OX=9606 GN=CDK5 PE=1 SV=3
1136,TRUE,Q96RU7	TRIB3_HUMAN,125.43055,4,,,,,,,,,3309.7454,3940.2637,325.21924,,4,,,,,,,,,4,4,1,,,39577.61,Tribbles homolog 3 OS=Homo sapiens OX=9606 GN=TRIB3 PE=1 SV=2
197,TRUE,Q99623	PHB2_HUMAN,370.0631,27,25024.355,48172.76,666496.2,582249.5,113275.01,34071.9,90990.73,139339.9,728072.44,728584.75,34045.67,38086.867,27,18,22,76,66,28,22,33,29,92,89,18,20,Oxidation (M),33296.38,Prohibitin-2 OS=Homo sapiens OX=9606 GN=PHB2 PE=1 SV=2
539,TRUE,P17706	PTN2_HUMAN,189.49806,10,695.99695,1213.9402,4378.702,3788.1084,783.6217,,,391.56873,1589.437,2304.2822,745.0501,408.27722,10,4,9,10,8,2,1,,2,4,5,5,4,Carbamidomethylation; Oxidation (M),48473.266,Tyrosine-protein phosphatase non-receptor type 2 OS=Homo sapiens OX=9606 GN=PTPN2 PE=1 SV=2
287,TRUE,P04899	GNAI2_HUMAN,332.70853,18,2466.8015,9500.142,17964.121,14936.555,23204.361,1663.0907,13347.8,26223.768,7006.384,8568.834,5668.79,5370.7964,11,22,21,42,31,33,26,32,48,31,26,11,15,Oxidation (M); Carbamidomethylation,40450.902,Guanine nucleotide-binding protein G(i) subunit alpha-2 OS=Homo sapiens OX=9606 GN=GNAI2 PE=1 SV=3
113,TRUE,Q5T9A4	ATD3B_HUMAN,320.5637,29,15727.969,36405.402,152496.88,137694.47,52629.645,12006.407,22895.553,44752.207,173378.48,136430.08,27555.037,42797.367,29,18,18,60,57,37,21,23,31,62,68,22,24,Oxidation (M); Carbamidomethylation,72572.92,ATPase family AAA domain-containing protein 3B OS=Homo sapiens OX=9606 GN=ATAD3B PE=1 SV=1
137,TRUE,P23396	RS3_HUMAN,422.12915,31,407692.44,558147.94,1013743.06,811938.7,377547.88,103081.03,354285.38,439723.9,1052185.2,1130493.4,557199.56,582051.1,31,99,111,138,127,71,67,90,93,160,145,127,121,Carbamidomethylation; Oxidation (M),26688.31,40S ribosomal protein S3 OS=Homo sapiens OX=9606 GN=RPS3 PE=1 SV=2
486,TRUE,Q9BTW9	TBCD_HUMAN,258.84256,14,,,1393.2148,906.28906,822.4838,,1048.4722,2698.0784,3790.393,2484.3516,,302.09735,14,,1,10,8,9,,5,11,11,10,,1,Carbamidomethylation,132599.94,Tubulin-specific chaperone D OS=Homo sapiens OX=9606 GN=TBCD PE=1 SV=2
148,TRUE,Q460N5	PAR14_HUMAN,347.5832,31,1570.7415,6560.7656,9234.866,9632.476,22073.244,97.4774,714.6754,3208.2693,2153.1794,2095.9355,172.12851,159.20749,31,15,16,37,24,57,20,9,11,9,9,1,4,Carbamidomethylation; Oxidation (M); Acetylation (N-term),202800.2,Protein mono-ADP-ribosyltransferase PARP14 OS=Homo sapiens OX=9606 GN=PARP14 PE=1 SV=3
173,TRUE,O14974	MYPT1_HUMAN,316.13516,26,2833.556,8000.4736,19625.129,12590.758,4446.4863,267.22034,4682.9565,7576.0996,24498.275,24735.266,4058.6262,5429.1606,26,17,16,33,23,18,5,10,16,33,30,12,14,Oxidation (M); Carbamidomethylation,115280.71,Protein phosphatase 1 regulatory subunit 12A OS=Homo sapiens OX=9606 GN=PPP1R12A PE=1 SV=1
556,TRUE,Q5T2T1	MPP7_HUMAN,251.79588,10,322.4186,2638.7153,5425.394,4474.368,5753.1113,,2326.9988,6879.111,6040.895,6073.952,203.24245,1943.269,10,6,7,10,11,15,9,12,10,12,9,8,9,Oxidation (M),65523.74,MAGUK p55 subfamily member 7 OS=Homo sapiens OX=9606 GN=MPP7 PE=1 SV=1
859,TRUE,Q8IWK6	AGRA3_HUMAN,195.94766,7,,782.0806,3578.0586,,484.532,,,656.5248,762.2818,1044.4524,1360.3065,103.28081,7,3,5,2,1,2,,4,2,2,3,6,5,,146150.77,Adhesion G protein-coupled receptor A3 OS=Homo sapiens OX=9606 GN=ADGRA3 PE=1 SV=2
757,TRUE,P49354	FNTA_HUMAN,205.454,8,,,2020.5676,1891.3989,,,,442.10587,4553.9233,4425.2754,,,8,,,7,4,1,,1,3,5,7,,1,Carbamidomethylation,44408.633,Protein farnesyltransferase/geranylgeranyltransferase type-1 subunit alpha OS=Homo sapiens OX=9606 GN=FNTA PE=1 SV=1
1123,TRUE,O43194	GPR39_HUMAN,181.23973,4,,,1533.251,829.62317,5465.4385,190.13058,2161.288,102.37892,,2756.474,,,4,1,,3,3,4,2,4,3,1,1,1,2,,51328.816,G-protein coupled receptor 39 OS=Homo sapiens OX=9606 GN=GPR39 PE=1 SV=1
669,TRUE,Q9H0H5	RGAP1_HUMAN,217.5891,9,904.59393,3957.4756,7783.193,2642.8132,79.16737,,,341.15918,1103.4471,4852.702,1954.5322,2263.0234,9,6,10,11,9,2,,,3,5,10,6,7,Oxidation (M),71026.53,Rac GTPase-activating protein 1 OS=Homo sapiens OX=9606 GN=RACGAP1 PE=1 SV=1
1180,TRUE,Q9UHA4	LTOR3_HUMAN,117.889,3,,897.5775,19114.543,14085.993,,,,,11385.989,10119.336,227.9823,177.66739,3,,1,7,3,,,,,3,4,1,1,,13622.726,Ragulator complex protein LAMTOR3 OS=Homo sapiens OX=9606 GN=LAMTOR3 PE=1 SV=1
34,TRUE,P14625	ENPL_HUMAN,509.53613,63,98501.49,208529.89,1471362,1134268.8,480182.22,100564.555,235507.69,401176.8,1576111.8,1700283,149668.42,212206.97,61,74,96,275,217,115,87,96,118,285,284,77,94,Oxidation (M); Carbamidomethylation,92468.86,Endoplasmin OS=Homo sapiens OX=9606 GN=HSP90B1 PE=1 SV=1
1337,TRUE,O94985	CSTN1_HUMAN,113.21518,2,,,,,,,,,,,,,2,,,1,,,,,,2,,,,,109792.75,Calsyntenin-1 OS=Homo sapiens OX=9606 GN=CLSTN1 PE=1 SV=1
243,TRUE,Q16181	SEPT7_HUMAN,341.1842,20,909.03894,4710.585,55459.43,40904.277,9578.265,443.608,4699.0283,12753.375,69049.32,68200.49,3568.314,7449.074,19,11,10,27,42,19,10,12,18,41,33,11,17,Carbamidomethylation; Oxidation (M),50679.938,Septin-7 OS=Homo sapiens OX=9606 GN=SEPTIN7 PE=1 SV=2
821,TRUE,Q96QA5	GSDMA_HUMAN,191.15506,6,,,1390.6976,306.56158,,,,,,,,,6,1,,8,4,2,,,,,,,,Oxidation (M),49364.86,Gasdermin-A OS=Homo sapiens OX=9606 GN=GSDMA PE=1 SV=4
399,TRUE,P63092	GNAS2_HUMAN,283.71777,15,8715.438,11647.711,43617.043,29394.44,31835.19,4353.2886,8847.634,21750.15,36656.53,36561.52,6329.414,6655.3037,14,15,18,28,29,28,18,16,19,25,20,17,14,Carbamidomethylation; Oxidation (M),45664.58,Guanine nucleotide-binding protein G(s) subunit alpha isoforms short OS=Homo sapiens OX=9606 GN=GNAS PE=1 SV=1
17,TRUE,P07814	SYEP_HUMAN,545.2279,90,830755.06,3049332.2,859828.4,601050.9,1522007,43111.32,334999.03,2103738.8,1025819.7,1221558.5,203936.83,257914.56,90,304,376,285,259,169,93,167,209,310,301,160,171,Acetylation (N-term); Oxidation (M); Carbamidomethylation,170590.89,Bifunctional glutamate/proline--tRNA ligase OS=Homo sapiens OX=9606 GN=EPRS1 PE=1 SV=5
372,TRUE,Q13131	AAPK1_HUMAN,250.84145,13,1975.3802,2687.7715,5308.6514,5989.4297,6595.1514,283.06036,4204.1167,7948.865,6402.0547,10496.058,1846.0491,4354.9004,13,7,10,18,17,16,9,16,16,22,15,12,11,Oxidation (M); Carbamidomethylation,64009.223,5'-AMP-activated protein kinase catalytic subunit alpha-1 OS=Homo sapiens OX=9606 GN=PRKAA1 PE=1 SV=4
419,TRUE,Q9UHW9	S12A6_HUMAN,282.50443,12,,,8022.7383,2048.589,6667.688,133.14827,1620.7305,3733.1875,6122.5923,9540.518,,,10,2,2,19,15,20,9,11,9,12,18,,,Carbamidomethylation; Oxidation (M),127616.9,Solute carrier family 12 member 6 OS=Homo sapiens OX=9606 GN=SLC12A6 PE=1 SV=2
561,TRUE,O95297	MPZL1_HUMAN,278.65503,12,26216.566,61123.67,40893.402,29811.508,48184.47,7025.199,36384.34,78586.36,106617.38,111079.37,41782.94,63350.016,12,12,22,19,15,15,11,15,16,26,27,17,21,Carbamidomethylation,29082.18,Myelin protein zero-like protein 1 OS=Homo sapiens OX=9606 GN=MPZL1 PE=1 SV=1
1132,TRUE,Q96L92	SNX27_HUMAN,149.414,4,,,298.28973,,722.0653,,100.5941,275.4342,1022.3163,1457.9249,,,4,,,2,1,4,,1,2,3,3,,,,61265.18,Sorting nexin-27 OS=Homo sapiens OX=9606 GN=SNX27 PE=1 SV=2
5,TRUE,P58107	EPIPL_HUMAN,578.4191,151,80753.664,176668.69,636566.56,470558.38,116010.04,13601.616,91609.17,143074.62,648425.56,716929.9,117109.53,165663.11,128,155,202,335,299,160,75,145,160,340,341,157,178,Oxidation (M); Carbamidomethylation,555658.1,Epiplakin OS=Homo sapiens OX=9606 GN=EPPK1 PE=1 SV=3
166,TRUE,Q9UDY2	ZO2_HUMAN,336.04352,28,14186.126,19715.719,47108.367,32779.242,25404.314,380.51038,27579.186,15608.825,34694.59,38600.027,8191.545,11170.046,28,21,32,41,34,31,16,26,27,28,36,22,21,Carbamidomethylation; Oxidation (M),133958.03,Tight junction protein ZO-2 OS=Homo sapiens OX=9606 GN=TJP2 PE=1 SV=2
336,TRUE,O75083	WDR1_HUMAN,303.35248,17,,,15420.591,8299.934,3331.3794,143.69316,3815.025,6391.263,27508.496,31633.336,,255.3963,17,,,18,14,11,3,11,12,23,25,1,2,Carbamidomethylation; Acetylation (N-term); Oxidation (M),66193.516,WD repeat-containing protein 1 OS=Homo sapiens OX=9606 GN=WDR1 PE=1 SV=4
218,TRUE,Q8TD16	BICD2_HUMAN,312.19437,25,301.98242,1735.2683,23370.088,11815.723,4919.3677,,2332.477,7490.06,39669.598,30256.494,1323.5757,2286.3389,25,7,9,30,24,17,2,12,14,28,34,5,10,Oxidation (M),93533.14,Protein bicaudal D homolog 2 OS=Homo sapiens OX=9606 GN=BICD2 PE=1 SV=1
775,TRUE,P00390	GSHR_HUMAN,198.87715,7,,,182.61603,207.36836,386.94012,,266.28876,584.3036,2129.1853,4173.3486,,287.47983,7,,,4,7,2,,2,4,7,6,1,1,Carbamidomethylation; Oxidation (M),56257.008,"Glutathione reductase, mitochondrial OS=Homo sapiens OX=9606 GN=GSR PE=1 SV=2"
785,TRUE,P16298	PP2BB_HUMAN,173.69801,7,,103.16318,,,,,,,,,,,2,,5,10,4,5,1,9,9,13,9,3,4,Oxidation (M),59024.285,Serine/threonine-protein phosphatase 2B catalytic subunit beta isoform OS=Homo sapiens OX=9606 GN=PPP3CB PE=1 SV=2
70,TRUE,P00533	EGFR_HUMAN,446.23593,46,361505.16,588368.4,393231.56,298357.6,443393.62,105697.055,362049.03,555777.94,620110.3,615730.4,486471.94,585577.2,42,101,119,107,84,102,70,98,133,120,109,118,112,Oxidation (M); Carbamidomethylation,134277.39,Epidermal growth factor receptor OS=Homo sapiens OX=9606 GN=EGFR PE=1 SV=2
496,TRUE,Q8N6H7	ARFG2_HUMAN,259.60968,12,698.0719,2032.998,6770.449,4050.5447,3638.4375,298.81598,4101.526,5038.259,12153.799,9048.161,1540.948,2911.8298,12,3,8,7,9,10,2,9,7,11,9,4,4,Oxidation (M); Carbamidomethylation,56720.36,ADP-ribosylation factor GTPase-activating protein 2 OS=Homo sapiens OX=9606 GN=ARFGAP2 PE=1 SV=1
1,TRUE,Q09666	AHNK_HUMAN,673.97577,321,434612.2,873832.25,1939131,1473871.2,1208592,169638.64,726171.9,1264433.4,3075349,2915697,586668,736901.75,321,472,549,816,721,636,376,547,642,1016,1041,487,513,Carbamidomethylation; Oxidation (M); Acetylation (N-term),629101.25,Neuroblast differentiation-associated protein AHNAK OS=Homo sapiens OX=9606 GN=AHNAK PE=1 SV=2
1035,FALSE,Q5VY80	ULBP6_HUMAN,99.17282,3,,311.87744,261.8043,,1053.6655,,,,,,,,3,2,1,2,,2,3,,,,,,,Carbamidomethylation,27509.1,UL16-binding protein 6 OS=Homo sapiens OX=9606 GN=RAET1L PE=1 SV=1
441,TRUE,Q8IWA5	CTL2_HUMAN,249.13641,13,13532.913,25883.217,43651.793,35345.09,60554.484,13436.451,31967.725,46552.387,32150.621,34333.082,14973.432,20844.432,13,11,19,24,20,29,21,21,21,20,23,10,13,Carbamidomethylation; Acetylation (N-term); Oxidation (M),80123.63,Choline transporter-like protein 2 OS=Homo sapiens OX=9606 GN=SLC44A2 PE=1 SV=3
574,TRUE,P52799	EFNB2_HUMAN,268.9893,9,591.1964,3922.3398,6435.938,5389.935,15454.658,2180.6226,10444.267,18541.15,10001.874,11445.125,3286.7302,2828.0935,7,10,8,12,13,21,9,18,19,24,24,7,10,Carbamidomethylation; Oxidation (M),36923.19,Ephrin-B2 OS=Homo sapiens OX=9606 GN=EFNB2 PE=1 SV=1
1336,TRUE,O75144	ICOSL_HUMAN,87.03978,2,313.39325,869.6815,276.3656,,,,456.21204,550.7249,,,485.11346,455.3133,2,1,3,1,,2,,2,2,,,1,6,,33348.832,ICOS ligand OS=Homo sapiens OX=9606 GN=ICOSLG PE=1 SV=2
1016,TRUE,Q86YQ8	CPNE8_HUMAN,126.37961,5,,,144.43512,,,,,,751.68536,482.07907,,,4,,,2,1,,,1,1,6,3,1,1,Oxidation (M); Carbamidomethylation,63107.625,Copine-8 OS=Homo sapiens OX=9606 GN=CPNE8 PE=1 SV=2
1311,TRUE,P51452	DUS3_HUMAN,80.64969,2,,,,,,,,394.66577,,,,,2,,,,,,,,2,,,,,,20478.281,Dual specificity protein phosphatase 3 OS=Homo sapiens OX=9606 GN=DUSP3 PE=1 SV=1
603,TRUE,Q9H0B6	KLC2_HUMAN,224.10184,11,,,4178.343,1336.5493,189.32083,,,327.68726,8644.942,8193.058,357.38666,,11,,,11,7,3,1,3,2,13,13,2,,,68934.6,Kinesin light chain 2 OS=Homo sapiens OX=9606 GN=KLC2 PE=1 SV=1
768,TRUE,Q8NHV4	NEDD1_HUMAN,215.17787,8,247.67061,408.1397,2371.2896,2250.8977,,,,530.9288,3696.016,2713.1206,,411.44305,8,3,6,7,7,,,2,4,7,11,2,7,,71966.086,Protein NEDD1 OS=Homo sapiens OX=9606 GN=NEDD1 PE=1 SV=1
147,TRUE,Q9UM54	MYO6_HUMAN,322.1731,30,,,12514.192,8206.804,8365.056,,3303.8787,7470.8228,15521.367,16221.559,384.66562,754.9734,30,,2,31,31,21,10,21,23,34,25,2,7,Oxidation (M); Carbamidomethylation,149691.06,Unconventional myosin-VI OS=Homo sapiens OX=9606 GN=MYO6 PE=1 SV=4
375,TRUE,P53985	MOT1_HUMAN,339.49887,16,38271.848,57056.69,126259,69766.34,25729.715,1496.4971,19993.037,33433.12,236388.6,268269.3,92915.07,127754.86,16,27,30,32,24,17,7,13,22,56,60,40,43,Carbamidomethylation; Oxidation (M),53944.145,Monocarboxylate transporter 1 OS=Homo sapiens OX=9606 GN=SLC16A1 PE=1 SV=3
75,TRUE,Q9UIW2	PLXA1_HUMAN,405.09106,41,12405.779,31631.014,15727.992,9931.392,27027.441,1826.5139,25627.416,47291.863,39982.055,31353.209,36080.92,40621.6,28,54,60,57,50,59,36,70,80,67,67,71,58,Oxidation (M); Carbamidomethylation,211067.05,Plexin-A1 OS=Homo sapiens OX=9606 GN=PLXNA1 PE=1 SV=3
494,TRUE,O95786	DDX58_HUMAN,254.07787,13,790.2578,1500.4216,6154.518,3667.344,5969.065,,,,,,,,13,7,7,14,15,8,6,1,,,,,,Carbamidomethylation,106599.66,Antiviral innate immune response receptor RIG-I OS=Homo sapiens OX=9606 GN=DDX58 PE=1 SV=2
1115,TRUE,Q92854	SEM4D_HUMAN,167.18282,3,149.45096,1101.7057,881.2138,,1843.1064,,334.314,1703.0613,3600.4302,1759.1208,462.6756,1035.9269,3,3,3,1,2,4,1,3,3,4,3,4,4,Oxidation (M),96149.9,Semaphorin-4D OS=Homo sapiens OX=9606 GN=SEMA4D PE=1 SV=1
1168,TRUE,P46108	CRK_HUMAN,145.72076,3,,,,,,,,,246.81998,662.3199,,,3,,,2,,,,,1,2,1,,,,33830.69,Adapter molecule crk OS=Homo sapiens OX=9606 GN=CRK PE=1 SV=2
134,TRUE,Q9Y6M7	S4A7_HUMAN,402.95523,30,380.6759,2973.6353,47236.58,34715.113,75863.266,11127.724,107959.375,183733.84,175921.22,182059.9,4131.081,5109.681,30,8,11,41,37,54,33,57,64,61,65,22,18,Oxidation (M); Carbamidomethylation,136044,Sodium bicarbonate cotransporter 3 OS=Homo sapiens OX=9606 GN=SLC4A7 PE=1 SV=2
671,TRUE,Q96RD7	PANX1_HUMAN,217.99109,7,1107.0408,2609.215,3564.9546,2794.4954,24167.668,4042.7615,16614.72,28948.422,4750.3657,3652.9263,2056.6702,3121.6301,7,4,3,7,5,16,11,16,22,5,3,6,5,Carbamidomethylation; Oxidation (M),48050.113,Pannexin-1 OS=Homo sapiens OX=9606 GN=PANX1 PE=1 SV=4
382,TRUE,Q9P0V3	SH3B4_HUMAN,299.99582,17,4525.5005,11928.041,14399.78,7949.759,13421.207,1030.7341,8016.1353,14774.874,8569.66,4917.613,5105.3667,5957.4673,17,14,16,19,18,20,16,20,23,17,16,10,12,Oxidation (M); Carbamidomethylation,107495.78,SH3 domain-binding protein 4 OS=Homo sapiens OX=9606 GN=SH3BP4 PE=1 SV=1
142,TRUE,Q8WUM4	PDC6I_HUMAN,380.88724,33,5534.208,14451.021,26958.527,20820.191,17250.086,506.83243,12635.121,28425.31,69703.67,60592.23,18367.764,24005.799,33,18,24,34,34,22,14,22,26,51,50,33,35,Acetylation (N-term); Carbamidomethylation; Oxidation (M),96023.164,Programmed cell death 6-interacting protein OS=Homo sapiens OX=9606 GN=PDCD6IP PE=1 SV=1
227,TRUE,Q92597	NDRG1_HUMAN,298.70435,11,3238.4648,6931.9434,29475.326,18453.855,34879.277,4620.2188,34042.785,62134.13,61610.105,61163.418,13003.475,13313.59,11,13,18,25,27,32,21,36,43,46,50,26,25,Oxidation (M); Carbamidomethylation; Acetylation (N-term),42835.438,Protein NDRG1 OS=Homo sapiens OX=9606 GN=NDRG1 PE=1 SV=1
673,TRUE,Q9NQC3	RTN4_HUMAN,257.8,8,3184.6384,2912.0676,64007.117,48651.438,4274.883,,160.5956,464.87772,38758.27,43363.516,667.05273,724.11414,8,9,9,24,26,11,5,2,1,18,25,3,2,Oxidation (M); Acetylation (N-term); Carbamidomethylation,129931.414,Reticulon-4 OS=Homo sapiens OX=9606 GN=RTN4 PE=1 SV=2
1268,TRUE,Q14956	GPNMB_HUMAN,141.63907,2,,,2019.6317,2238.9587,3057.5786,1371.3883,,,,,,,2,,1,6,3,8,5,,1,,,,,Oxidation (M),63922.543,Transmembrane glycoprotein NMB OS=Homo sapiens OX=9606 GN=GPNMB PE=1 SV=2
245,TRUE,P38606	VATA_HUMAN,318.03015,16,1769.5437,4709.037,25475.93,15524.323,624.83386,,972.7339,2420.0093,22856.078,21710.469,3405.1543,2719.4229,16,8,16,31,27,7,,5,7,27,23,5,9,Oxidation (M); Carbamidomethylation,68304.08,V-type proton ATPase catalytic subunit A OS=Homo sapiens OX=9606 GN=ATP6V1A PE=1 SV=2
1297,TRUE,Q7RTP0	NIPA1_HUMAN,94.698685,2,,,782.7354,225.6198,,,,,,253.4162,,,2,,,4,2,,,,,,1,,,,34561.953,Magnesium transporter NIPA1 OS=Homo sapiens OX=9606 GN=NIPA1 PE=1 SV=1
834,TRUE,Q8IWU5	SULF2_HUMAN,191.81383,7,789.22424,3335.332,333.50647,340.6626,2720.6921,,1691.5372,6511.668,1198.8726,1223.2106,718.4422,2058.8264,7,5,5,4,4,4,,2,10,6,8,1,4,,100454.62,Extracellular sulfatase Sulf-2 OS=Homo sapiens OX=9606 GN=SULF2 PE=1 SV=1
1396,TRUE,P36639	8ODP_HUMAN,119.13822,2,,,902.9265,,91.65198,,,,1950.4231,1501.5659,,,2,,,2,2,2,,1,1,3,5,1,,,22519.592,"7,8-dihydro-8-oxoguanine triphosphatase OS=Homo sapiens OX=9606 GN=NUDT1 PE=1 SV=3"
1330,TRUE,Q9NZQ7	PD1L1_HUMAN,75.83524,2,,,,,,,,,,,,,2,,,,,1,1,,1,,,,,,33275.344,Programmed cell death 1 ligand 1 OS=Homo sapiens OX=9606 GN=CD274 PE=1 SV=1
1161,TRUE,Q15517	CDSN_HUMAN,135.17728,3,,,,,1734.8783,158.31274,925.82587,684.09357,,,,,3,,,1,,4,2,3,1,,,,,,51522.08,Corneodesmosin OS=Homo sapiens OX=9606 GN=CDSN PE=1 SV=3
1007,TRUE,Q6PFW1	VIP1_HUMAN,190.80302,4,,256.1865,840.6097,485.57974,98.8218,,,179.25989,3199.542,3832.005,439.5131,577.8583,4,1,5,6,4,2,,3,5,9,8,5,6,Oxidation (M),159521.06,Inositol hexakisphosphate and diphosphoinositol-pentakisphosphate kinase 1 OS=Homo sapiens OX=9606 GN=PPIP5K1 PE=1 SV=1
312,TRUE,P09211	GSTP1_HUMAN,358.03687,14,14500.195,46267.867,189709.05,154423.1,52501.22,11965.998,32778.04,92133.8,243005.61,254719.44,31596.82,51018.977,14,22,24,48,65,35,27,36,32,38,56,27,20,Oxidation (M); Carbamidomethylation,23355.826,Glutathione S-transferase P OS=Homo sapiens OX=9606 GN=GSTP1 PE=1 SV=2
1151,TRUE,Q8IUH5	ZDH17_HUMAN,99.8305,4,,,356.66034,,,,,,,,,,4,,,4,1,,,,,,2,1,,,72639.84,Palmitoyltransferase ZDHHC17 OS=Homo sapiens OX=9606 GN=ZDHHC17 PE=1 SV=2
658,TRUE,P49903	SPS1_HUMAN,243.7223,8,,,10148.599,5521.1665,822.8815,,,,5581.877,8973.005,,,8,,,17,12,4,,,,11,12,,,Carbamidomethylation; Oxidation (M),42910.58,"Selenide, water dikinase 1 OS=Homo sapiens OX=9606 GN=SEPHS1 PE=1 SV=2"
1155,TRUE,O95721	SNP29_HUMAN,98.79378,3,,,484.78653,653.7931,,,,,2361.7656,2341.2366,,,3,,,3,1,,,,,3,4,,,,28970.32,Synaptosomal-associated protein 29 OS=Homo sapiens OX=9606 GN=SNAP29 PE=1 SV=1
1319,TRUE,Q99828	CIB1_HUMAN,110.82148,2,,,,72.45015,,,,,208.29846,,,,2,,,,1,2,,1,1,1,,,,,21703.385,Calcium and integrin-binding protein 1 OS=Homo sapiens OX=9606 GN=CIB1 PE=1 SV=4
1435,TRUE,P29466	CASP1_HUMAN,92.799675,2,,,383.4821,,,,,,,,,,2,,,1,1,1,,,,,,,,Oxidation (M),45158.613,Caspase-1 OS=Homo sapiens OX=9606 GN=CASP1 PE=1 SV=1
8,TRUE,P15924	DESP_HUMAN,560.13556,137,135539.88,305999.94,448881.8,319944.1,110027.984,9529.549,120792.234,212549.97,591170.3,575005.06,190962.89,240800.34,137,168,199,230,213,122,71,144,163,263,239,160,173,Oxidation (M); Carbamidomethylation,331773.88,Desmoplakin OS=Homo sapiens OX=9606 GN=DSP PE=1 SV=3
965,FALSE,Q9NRD8	DUOX2_HUMAN,104.013084,2,,,1183.705,791.26276,820.59607,,,240.83635,,,,,2,,,3,3,1,,,1,1,,,,,175364.39,Dual oxidase 2 OS=Homo sapiens OX=9606 GN=DUOX2 PE=1 SV=2
1340,TRUE,O60906	NSMA_HUMAN,103.20494,2,,,238.1239,,,,,,,284.55765,,,2,,,3,1,,,,,1,2,,,,47645.64,Sphingomyelin phosphodiesterase 2 OS=Homo sapiens OX=9606 GN=SMPD2 PE=1 SV=2
744,TRUE,Q16186	ADRM1_HUMAN,167.42035,6,,187.99863,2421.525,1080.8782,,,,234.23764,3744.7754,3919.624,223.07593,357.4459,6,1,1,5,6,1,,1,2,3,8,2,2,Oxidation (M); Carbamidomethylation,42153.254,Proteasomal ubiquitin receptor ADRM1 OS=Homo sapiens OX=9606 GN=ADRM1 PE=1 SV=2
884,TRUE,Q6EMK4	VASN_HUMAN,204.67325,6,728.93555,4170.6816,2328.7249,1353.4497,3758.528,147.81165,297.24203,793.73254,1219.1987,1129.9775,309.11536,413.8822,6,4,10,6,2,6,3,1,2,2,1,1,1,,71712.65,Vasorin OS=Homo sapiens OX=9606 GN=VASN PE=1 SV=1
235,TRUE,P06396	GELS_HUMAN,311.20532,19,1215.2665,4205.578,56346.66,42903.945,8803.914,844.29047,9150.263,16253.071,114063.27,122647.17,3767.8833,9103.337,19,7,8,39,37,15,6,16,19,53,48,9,9,Oxidation (M); Carbamidomethylation,85697.516,Gelsolin OS=Homo sapiens OX=9606 GN=GSN PE=1 SV=1
1264,TRUE,Q96QU8	XPO6_HUMAN,84.34472,3,148.4161,,,,,,,,269.80554,,110.73071,,3,2,1,2,,,,,,2,,1,,Carbamidomethylation,128883.07,Exportin-6 OS=Homo sapiens OX=9606 GN=XPO6 PE=1 SV=1
1329,TRUE,O75970	MPDZ_HUMAN,80.51436,2,,,,,,,,,,,,,2,,,,,,,,,1,1,,,,221617.8,Multiple PDZ domain protein OS=Homo sapiens OX=9606 GN=MPDZ PE=1 SV=2
853,TRUE,Q9UKE5	TNIK_HUMAN,188.66364,7,6631.451,7758.8315,4510.645,3546.9175,3969.833,1091.6997,2151.1987,3612.8652,562.5513,18063.451,3968.721,1479.6709,7,6,6,3,3,5,5,4,4,5,3,4,3,,154943.2,TRAF2 and NCK-interacting protein kinase OS=Homo sapiens OX=9606 GN=TNIK PE=1 SV=1
195,TRUE,P04439	HLAA_HUMAN,387.98465,25,39932.605,61478.08,293454.62,233569.7,263219.84,69178.39,136558.6,190633.28,271867.7,277867.75,36376.555,37618.71,15,30,33,69,73,65,43,47,62,80,80,33,23,Carbamidomethylation; Oxidation (M),40840.723,"HLA class I histocompatibility antigen, A alpha chain OS=Homo sapiens OX=9606 GN=HLA-A PE=1 SV=2"
1052,TRUE,Q9NNW5	WDR6_HUMAN,158.06566,5,,,827.9414,383.84097,,,,,966.85425,1287.3042,,,5,,,4,4,,,1,4,8,5,,1,Carbamidomethylation,121724.586,WD repeat-containing protein 6 OS=Homo sapiens OX=9606 GN=WDR6 PE=1 SV=1
998,TRUE,O00161	SNP23_HUMAN,194.005,5,1752.2407,449.14618,4104.643,2886.5227,1589.5483,780.687,1117.3761,1779.9385,2829.5642,2231.54,1309.096,1183.9558,5,2,10,6,5,9,2,1,6,5,5,3,2,Oxidation (M); Carbamidomethylation,23354.041,Synaptosomal-associated protein 23 OS=Homo sapiens OX=9606 GN=SNAP23 PE=1 SV=1
1267,TRUE,P60033	CD81_HUMAN,164.75842,3,2946.6274,8641.149,9749.781,4133.5356,,,,,18491.318,19182.797,4223.33,6036.41,3,9,9,7,7,2,,,,10,13,7,6,Carbamidomethylation,25809.395,CD81 antigen OS=Homo sapiens OX=9606 GN=CD81 PE=1 SV=1
258,TRUE,Q15334	L2GL1_HUMAN,313.213,20,1542.4758,6082.6865,9864.546,4509.943,11974.751,135.94499,8562.657,19245.686,8920.146,9864.081,3858.675,6664.725,20,10,12,22,15,21,16,18,24,15,14,9,11,Oxidation (M); Carbamidomethylation,115418.04,Lethal(2) giant larvae protein homolog 1 OS=Homo sapiens OX=9606 GN=LLGL1 PE=1 SV=3
485,TRUE,Q9BRK5	CAB45_HUMAN,247.17253,11,,1175.245,7314.5195,5315.428,7878.4497,211.74655,742.7041,3437.064,4910.11,4528.9873,,459.5077,11,,4,16,15,20,5,5,8,11,13,1,4,Oxidation (M),41806.785,45 kDa calcium-binding protein OS=Homo sapiens OX=9606 GN=SDF4 PE=1 SV=1
433,TRUE,P13928	ANXA8_HUMAN,255.49777,11,222.22319,450.55432,26191.4,20137.549,3094.4597,228.82213,4148.2295,5711.5723,34114.47,40402.695,,1204.569,11,1,3,29,24,15,4,17,13,25,30,5,8,Carbamidomethylation; Oxidation (M),36881.01,Annexin A8 OS=Homo sapiens OX=9606 GN=ANXA8 PE=1 SV=3
1150,TRUE,P54105	ICLN_HUMAN,128.62938,4,1147.4683,1892.386,7880.4116,6703.521,5588.0596,1264.0356,4444.828,5422.0586,11565.61,12379.124,2334.065,1369.8501,4,1,1,2,1,2,1,1,4,3,5,1,1,Oxidation (M),26215.312,Methylosome subunit pICln OS=Homo sapiens OX=9606 GN=CLNS1A PE=1 SV=1
1224,TRUE,Q01628	IFM3_HUMAN,158.87558,2,20601.355,40103.09,33952.42,25259.418,13666.116,1808.3618,161.88937,423.1891,7607.3003,8869.646,900.7649,2064.5896,2,14,17,18,23,9,4,1,1,9,10,4,4,Oxidation (M),14632.091,Interferon-induced transmembrane protein 3 OS=Homo sapiens OX=9606 GN=IFITM3 PE=1 SV=2
647,TRUE,P14550	AK1A1_HUMAN,245.93913,9,,,14215.654,14696.712,498.83902,,779.4354,2399.78,22485.162,18444.105,,,9,,,13,15,1,,4,5,17,15,1,,Acetylation (N-term); Carbamidomethylation; Oxidation (M),36573.04,Aldo-keto reductase family 1 member A1 OS=Homo sapiens OX=9606 GN=AKR1A1 PE=1 SV=3
458,TRUE,P52292	IMA1_HUMAN,292.18744,12,1044.1819,3029.547,37876.64,24875.662,6607.69,,2812.9214,6439.6987,27478.846,27339.91,1583.524,2179.7927,12,7,13,30,28,12,4,10,12,22,30,9,9,Oxidation (M); Carbamidomethylation,57861.914,Importin subunit alpha-1 OS=Homo sapiens OX=9606 GN=KPNA2 PE=1 SV=1
163,TRUE,Q01518	CAP1_HUMAN,369.67706,26,,1045.1964,174239.05,119601.625,12479.669,1749.1056,7057.2085,9505.337,137888.12,144880.31,377.9485,416.65253,26,2,5,56,59,17,11,21,25,45,52,4,5,Carbamidomethylation; Oxidation (M),51901.457,Adenylyl cyclase-associated protein 1 OS=Homo sapiens OX=9606 GN=CAP1 PE=1 SV=5
1082,TRUE,P05109	S10A8_HUMAN,152.9222,4,5186.311,7589.875,57353.586,42634.67,8991.797,,,,,,,,4,2,4,10,6,4,2,,,,,,,Carbamidomethylation,10834.506,Protein S100-A8 OS=Homo sapiens OX=9606 GN=S100A8 PE=1 SV=1
112,TRUE,P31939	PUR9_HUMAN,397.47974,34,267.9653,783.1738,98899.56,71432.59,9005.245,,10863.998,15813.8545,160208.19,162975.48,1825.7756,2968.5571,34,1,2,75,65,19,5,22,23,78,76,6,10,Oxidation (M); Carbamidomethylation,64615.87,Bifunctional purine biosynthesis protein ATIC OS=Homo sapiens OX=9606 GN=ATIC PE=1 SV=3
1271,TRUE,P84074	HPCA_HUMAN,107.19927,3,,,2260.6436,1644.7847,325.12457,,,235.96106,1354.671,1635.1567,,,3,,,4,3,1,,,1,3,3,,1,,22427.402,Neuron-specific calcium-binding protein hippocalcin OS=Homo sapiens OX=9606 GN=HPCA PE=1 SV=2
1233,TRUE,O43688	PLPP2_HUMAN,148.4074,3,258.86932,1148.2632,,1270.5126,,,,,,3314.6892,471.82904,2519.6025,3,2,2,1,1,,2,,3,1,3,3,2,Carbamidomethylation,32573.771,Phospholipid phosphatase 2 OS=Homo sapiens OX=9606 GN=PLPP2 PE=1 SV=1
297,TRUE,P18433	PTPRA_HUMAN,334.657,20,2508.7166,6846.1875,5609.616,3868.0657,31541.871,2291.8792,25866.047,47529.5,15193.918,15748.627,7461.0195,9894.531,20,5,8,6,4,29,13,23,30,16,13,8,12,Carbamidomethylation; Oxidation (M),90719.05,Receptor-type tyrosine-protein phosphatase alpha OS=Homo sapiens OX=9606 GN=PTPRA PE=1 SV=3
1218,TRUE,Q9UPY5	XCT_HUMAN,140.82289,3,,,729.54913,606.8006,687.115,,,2813.5479,1671.6981,2130.6382,,,3,,,1,1,2,2,4,4,1,2,,1,Oxidation (M),55423.027,Cystine/glutamate transporter OS=Homo sapiens OX=9606 GN=SLC7A11 PE=1 SV=1
739,TRUE,P01116	RASK_HUMAN,210.9856,9,,384.96982,784.6628,365.10425,324.84592,,,529.7832,394.5015,700.7075,,,3,5,11,16,10,9,5,6,9,11,11,5,4,Oxidation (M); Carbamidomethylation,21655.824,GTPase KRas OS=Homo sapiens OX=9606 GN=KRAS PE=1 SV=1
254,TRUE,Q92974	ARHG2_HUMAN,323.89896,20,1034.8844,3409.9253,9672.751,5126.581,1718.5591,,1373.8397,3888.2446,19009.354,22616.525,2542.1438,3790.2332,20,12,16,25,19,6,3,12,18,23,31,16,13,Oxidation (M); Carbamidomethylation,111542.55,Rho guanine nucleotide exchange factor 2 OS=Homo sapiens OX=9606 GN=ARHGEF2 PE=1 SV=4
927,TRUE,P35568	IRS1_HUMAN,148.04152,6,,1222.7378,,,,,,,606.2255,265.05246,355.83167,432.5017,6,2,7,1,1,,,1,,2,5,2,3,Oxidation (M),131590.97,Insulin receptor substrate 1 OS=Homo sapiens OX=9606 GN=IRS1 PE=1 SV=1
255,TRUE,Q12907	LMAN2_HUMAN,320.5254,17,10483.337,22660.762,95060.96,77154.92,21754.186,2482.8215,13732.521,20340.768,107447.79,97048.016,7371.9023,9587.28,17,19,19,40,37,19,14,21,19,42,41,12,11,Oxidation (M); Carbamidomethylation,40228.664,Vesicular integral-membrane protein VIP36 OS=Homo sapiens OX=9606 GN=LMAN2 PE=1 SV=1
193,TRUE,Q8WVM8	SCFD1_HUMAN,345.023,21,712.8873,646.5338,65417.93,34014.15,2269.2778,,1060.0078,1544.4193,25070.621,24882.502,,483.47833,21,6,6,58,51,7,2,6,4,39,32,2,4,Carbamidomethylation; Oxidation (M),72379.84,Sec1 family domain-containing protein 1 OS=Homo sapiens OX=9606 GN=SCFD1 PE=1 SV=4
712,TRUE,Q9NYQ6	CELR1_HUMAN,221.07335,9,,811.58276,322.5614,,237.36533,,566.4476,3095.9473,1193.3674,1536.7668,1077.9409,1666.0085,8,4,3,4,1,3,2,6,10,8,8,7,7,Carbamidomethylation,329486.25,Cadherin EGF LAG seven-pass G-type receptor 1 OS=Homo sapiens OX=9606 GN=CELSR1 PE=1 SV=1
830,TRUE,Q9HCS2	CP4FC_HUMAN,177.10489,6,,,1979.5123,683.538,218.39221,,,,,,,,3,2,1,7,7,4,1,1,1,1,1,,,Oxidation (M),60308.89,Cytochrome P450 4F12 OS=Homo sapiens OX=9606 GN=CYP4F12 PE=1 SV=3
249,TRUE,Q08345	DDR1_HUMAN,293.89694,20,15445.359,32710.57,24378.62,18611.059,27262.473,3034.9668,13778.0625,30643.148,31372.447,32104.273,9605.786,13593.7705,20,22,29,26,21,16,12,24,29,30,27,17,21,Oxidation (M); Carbamidomethylation,101127.64,Epithelial discoidin domain-containing receptor 1 OS=Homo sapiens OX=9606 GN=DDR1 PE=1 SV=1
306,TRUE,P30530	UFO_HUMAN,282.05905,17,625.4677,3992.7944,4124.8774,1829.742,10300.365,,2099.3948,6373.803,7954.1865,8792.109,1702.6797,1754.7959,16,12,17,17,14,25,9,10,21,17,19,10,14,Carbamidomethylation; Oxidation (M),98336.71,Tyrosine-protein kinase receptor UFO OS=Homo sapiens OX=9606 GN=AXL PE=1 SV=4
759,TRUE,Q8IWB1	IPRI_HUMAN,199.06772,8,,607.9104,7518.781,1942.5875,436.97064,,,,3178.0408,1124.7446,,,8,,3,6,7,2,,,,6,5,,,Carbamidomethylation; Oxidation (M),62059.535,"Inositol 1,4,5-trisphosphate receptor-interacting protein OS=Homo sapiens OX=9606 GN=ITPRIP PE=1 SV=1"
1294,TRUE,Q9Y3E7	CHMP3_HUMAN,71.6,2,,,1088.5823,226.60226,,,,,984.46875,862.8187,,,2,,,2,1,1,,,,1,1,,,,25073.04,Charged multivesicular body protein 3 OS=Homo sapiens OX=9606 GN=CHMP3 PE=1 SV=3
283,TRUE,Q15084	PDIA6_HUMAN,346.55347,21,31536.613,54949.625,572596.8,441095.3,50862.105,17662.09,33681.215,40887.87,538643.6,468989.2,35568.914,37161.355,20,21,18,68,59,24,20,16,20,58,61,13,14,Carbamidomethylation,48121.32,Protein disulfide-isomerase A6 OS=Homo sapiens OX=9606 GN=PDIA6 PE=1 SV=1
223,TRUE,O75976	CBPD_HUMAN,308.1128,23,,1460.5459,4947.306,5577.146,13325.232,808.52124,6211.769,9161.692,5212.029,6909.414,328.85226,441.40106,23,1,2,16,14,23,14,16,17,15,16,1,1,Oxidation (M); Carbamidomethylation,152931.05,Carboxypeptidase D OS=Homo sapiens OX=9606 GN=CPD PE=1 SV=2
371,TRUE,Q93050	VPP1_HUMAN,279.83417,13,,1317.5193,49377.15,22000.037,22596.158,1087.738,1333.5715,4100.09,12509.87,14259.612,,,13,,3,26,27,22,8,7,10,14,13,,,Oxidation (M),96412.72,V-type proton ATPase 116 kDa subunit a1 OS=Homo sapiens OX=9606 GN=ATP6V0A1 PE=1 SV=3
22,TRUE,P35580	MYH10_HUMAN,499.56558,93,,658.6216,121784.23,44011.832,16954.094,4376.513,10569.77,33450.44,271110.47,257491.94,2627.9832,2807.8396,76,12,10,114,94,65,24,67,94,164,176,39,39,Acetylation (N-term); Oxidation (M); Carbamidomethylation,228999.11,Myosin-10 OS=Homo sapiens OX=9606 GN=MYH10 PE=1 SV=3
172,TRUE,Q8IZJ1	UNC5B_HUMAN,361.5932,29,14565.85,42945.55,19998.205,13175.308,21578.172,1701.9297,26732.357,52921.688,69993.05,85843.43,40857.242,51746.55,29,28,35,30,27,29,21,34,43,47,52,35,38,Carbamidomethylation; Oxidation (M),103637.91,Netrin receptor UNC5B OS=Homo sapiens OX=9606 GN=UNC5B PE=1 SV=2
765,TRUE,P07948	LYN_HUMAN,189.64532,7,358.21204,1551.8741,3473.2612,1901.1846,3229.9255,,1786.6494,4398.401,9430.876,4994.2754,1007.33093,1608.4875,7,4,6,8,3,9,1,8,7,7,7,6,10,Carbamidomethylation; Oxidation (M),58574.082,Tyrosine-protein kinase Lyn OS=Homo sapiens OX=9606 GN=LYN PE=1 SV=3
91,FALSE,A6NMY6	AXA2L_HUMAN,388.64215,31,155860.64,277477.84,952198.9,799198.9,499568,134904.69,392409.2,573736.7,1233884.4,1218590.4,264037.06,312114.03,31,41,49,87,77,80,46,75,76,116,110,47,56,Carbamidomethylation; Oxidation (M); Acetylation (N-term),38659.008,Putative annexin A2-like protein OS=Homo sapiens OX=9606 GN=ANXA2P2 PE=5 SV=2
267,TRUE,Q14126	DSG2_HUMAN,307.171,20,2228.1836,3752.1504,10078.1,6290.8354,3508.545,,1752.7828,1638.2606,22949.248,17927.213,965.6585,4744.268,20,5,9,21,18,10,2,7,13,28,29,10,12,Oxidation (M); Acetylation (N-term); Carbamidomethylation,122293.92,Desmoglein-2 OS=Homo sapiens OX=9606 GN=DSG2 PE=1 SV=2
798,TRUE,Q8WU76	SCFD2_HUMAN,212.19768,8,185.04744,324.02692,6383.933,5254.952,,,,233.56001,6858.2383,8747.492,133.81898,208.51181,8,3,4,10,10,,,1,1,13,14,2,2,Carbamidomethylation,75127.14,Sec1 family domain-containing protein 2 OS=Homo sapiens OX=9606 GN=SCFD2 PE=1 SV=2
511,TRUE,Q9Y666	S12A7_HUMAN,226.94952,12,,1827.1414,603.4917,140.71246,3652.8435,,3510.4033,6592.2773,2201.643,1348.0997,1440.1761,2101.8945,10,3,3,4,3,12,2,10,10,4,2,5,5,Oxidation (M),119105.836,Solute carrier family 12 member 7 OS=Homo sapiens OX=9606 GN=SLC12A7 PE=1 SV=3
200,TRUE,O75146	HIP1R_HUMAN,323.29266,25,448.3916,6187.3203,43417.176,18942.285,6939.6504,,,9186.592,16914.89,17905.906,1889.1613,7142.851,24,8,12,34,35,10,2,7,10,36,28,6,8,Oxidation (M); Carbamidomethylation,119388.31,Huntingtin-interacting protein 1-related protein OS=Homo sapiens OX=9606 GN=HIP1R PE=1 SV=2
650,TRUE,O75787	RENR_HUMAN,225.49968,9,313.75674,676.4281,14797.485,10489.814,7782.866,159.41222,1941.4299,4017.456,6733.4214,6772.7466,2497.6338,418.97852,9,5,2,10,13,9,3,3,3,4,5,5,2,Oxidation (M),39008.004,Renin receptor OS=Homo sapiens OX=9606 GN=ATP6AP2 PE=1 SV=2
1040,TRUE,P15291	B4GT1_HUMAN,185.3136,5,,,2390.7095,2150.9385,9410.27,2387.4297,6297.885,7808.8315,4092.7886,3986.5488,,,5,,,1,1,10,3,3,8,2,3,,,Oxidation (M),43920.266,"Beta-1,4-galactosyltransferase 1 OS=Homo sapiens OX=9606 GN=B4GALT1 PE=1 SV=5"
1058,TRUE,P11234	RALB_HUMAN,169.82558,4,1719.3839,5286.172,15447.678,10669.339,1811.3937,,451.03125,1218.0747,13210.617,12897.928,1548.3835,2510.2383,3,1,2,6,3,2,2,2,1,7,3,2,1,,23408.545,Ras-related protein Ral-B OS=Homo sapiens OX=9606 GN=RALB PE=1 SV=1
1033,FALSE,P10696	PPBN_HUMAN,134.33405,4,,,,,,,,,80.744316,,442.62668,139.72488,4,2,,1,,,,,1,2,,2,3,,57377,"Alkaline phosphatase, germ cell type OS=Homo sapiens OX=9606 GN=ALPG PE=2 SV=4"
83,TRUE,Q13835	PKP1_HUMAN,411.18304,32,54740.04,120247.77,160915.73,138609.27,37587.82,3253.9736,4707.4316,13696.829,93533.516,97290.984,24574.424,25901.834,32,57,68,82,88,38,19,15,17,70,57,38,34,Carbamidomethylation; Oxidation (M),82860.555,Plakophilin-1 OS=Homo sapiens OX=9606 GN=PKP1 PE=1 SV=2
715,TRUE,P61586	RHOA_HUMAN,235.39926,8,465.18475,1891.4622,19251.684,14227.153,198.02834,,210.7635,2415.3145,19740.11,29320.287,189.63898,634.0149,4,5,10,15,16,4,,3,5,18,14,3,3,Carbamidomethylation; Oxidation (M),21768.123,Transforming protein RhoA OS=Homo sapiens OX=9606 GN=RHOA PE=1 SV=1
862,TRUE,P15151	PVR_HUMAN,201.01813,5,15769.302,28055.389,9480.3545,7776.3574,41148.812,7214.587,40757.82,67491.7,22382.285,23531.518,34483.855,46045.938,5,11,12,9,5,16,6,17,19,15,9,15,20,Oxidation (M),45302.6,Poliovirus receptor OS=Homo sapiens OX=9606 GN=PVR PE=1 SV=2
861,TRUE,Q02413	DSG1_HUMAN,200.04315,7,219.82166,1291.2139,,,749.8071,,1251.6328,4972.214,493.75757,510.0485,270.90018,1564.9075,7,3,5,,,8,,9,15,2,2,4,3,Oxidation (M),113747.586,Desmoglein-1 OS=Homo sapiens OX=9606 GN=DSG1 PE=1 SV=2
1392,TRUE,Q3SXY8	AR13B_HUMAN,86.42264,2,,,,,,,,,,,,,2,,,,1,1,1,,,,1,,,,48643.223,ADP-ribosylation factor-like protein 13B OS=Homo sapiens OX=9606 GN=ARL13B PE=1 SV=1
51,TRUE,P04406	G3P_HUMAN,484.9988,41,33112.63,84142.58,1111821.6,878568.75,142044.06,20294.693,163535.5,231404.78,1326263.1,1387629,59971,62155.125,41,49,47,226,214,66,59,94,80,259,266,41,41,Oxidation (M); Carbamidomethylation,36053.207,Glyceraldehyde-3-phosphate dehydrogenase OS=Homo sapiens OX=9606 GN=GAPDH PE=1 SV=3
1140,TRUE,Q9Y508	RN114_HUMAN,131.9061,3,,105.17019,380.37363,327.4883,156.96297,,,362.33026,1145.0266,1331.873,679.0019,1597.8293,3,3,3,2,2,2,3,1,2,4,4,3,2,Carbamidomethylation; Oxidation (M),25694.328,E3 ubiquitin-protein ligase RNF114 OS=Homo sapiens OX=9606 GN=RNF114 PE=1 SV=1
202,TRUE,P12235	ADT1_HUMAN,334.9143,24,56152.78,82995.164,263171.66,220690.83,51126.77,15191.942,37488.098,46863.41,229470.06,230463.64,57711.39,62734.023,12,57,71,167,145,42,33,36,46,125,132,47,42,Carbamidomethylation; Acetylation (N-term); Oxidation (M),33064.492,ADP/ATP translocase 1 OS=Homo sapiens OX=9606 GN=SLC25A4 PE=1 SV=4
105,TRUE,P08581	MET_HUMAN,410.9617,35,79920.664,156577.38,42512.926,36084.88,129460.12,19797.861,89202.336,124917.19,56461.785,59818.586,107927.86,97345.83,35,54,75,40,39,69,39,52,63,49,46,65,59,Oxidation (M); Carbamidomethylation,155541.3,Hepatocyte growth factor receptor OS=Homo sapiens OX=9606 GN=MET PE=1 SV=4
641,TRUE,Q14156	EFR3A_HUMAN,246.22621,10,1183.7793,2444.0637,10458.831,2022.9467,5190.461,,1978.25,1108.9827,20855.564,1845.8171,767.20953,1058.5892,10,6,10,8,6,6,4,7,9,8,8,3,11,Carbamidomethylation; Oxidation (M),92924.34,Protein EFR3 homolog A OS=Homo sapiens OX=9606 GN=EFR3A PE=1 SV=2
863,TRUE,P36404	ARL2_HUMAN,177.24313,6,,404.43338,881.43616,527.01337,5301.8145,,1809.4626,8462.597,1926.0477,2142.8633,,,6,,4,4,4,10,1,9,9,3,5,,1,Oxidation (M),20877.994,ADP-ribosylation factor-like protein 2 OS=Homo sapiens OX=9606 GN=ARL2 PE=1 SV=4
840,TRUE,Q9UKG1	DP13A_HUMAN,204.99174,7,,,,356.31195,,,424.0966,1124.2021,3161.4595,3734.7144,,358.18607,7,,,5,2,4,,1,5,7,10,,2,,79663.47,DCC-interacting protein 13-alpha OS=Homo sapiens OX=9606 GN=APPL1 PE=1 SV=1
1133,TRUE,P21860	ERBB3_HUMAN,116.05094,4,197.86351,,,,461.61813,,,215.25429,,,145.5687,,4,1,2,,1,4,,1,2,,1,2,2,,148098.19,Receptor tyrosine-protein kinase erbB-3 OS=Homo sapiens OX=9606 GN=ERBB3 PE=1 SV=1
578,TRUE,Q14696	MESD_HUMAN,243.2123,8,,308.13806,29289.836,22801.38,1406.7206,,316.5586,1208.4127,24557.678,22856.74,,,8,2,1,14,19,1,2,2,1,11,18,1,1,Carbamidomethylation; Oxidation (M),26076.625,LRP chaperone MESD OS=Homo sapiens OX=9606 GN=MESD PE=1 SV=2
1026,TRUE,Q16555	DPYL2_HUMAN,145.06564,4,,,473.66913,97.96225,,,,133.71452,1334.3091,833.3074,,,4,,,4,5,2,,,2,4,2,1,1,Oxidation (M),62293.62,Dihydropyrimidinase-related protein 2 OS=Homo sapiens OX=9606 GN=DPYSL2 PE=1 SV=1
1406,TRUE,Q8N8R7	AL14E_HUMAN,102.77557,2,,87.4983,,151.38942,,,,,,176.36847,,,2,,1,2,1,,,,,1,1,,,,29337.553,ARL14 effector protein OS=Homo sapiens OX=9606 GN=ARL14EP PE=1 SV=1
755,TRUE,P13929	ENOB_HUMAN,253.72072,8,,,,,,,,,82.73575,,,,2,2,4,10,9,1,1,2,6,16,15,3,1,Carbamidomethylation; Oxidation (M),46986.875,Beta-enolase OS=Homo sapiens OX=9606 GN=ENO3 PE=1 SV=5
512,TRUE,P36507	MP2K2_HUMAN,257.5416,11,1679.49,1234.5339,10766.475,6851.312,2318.4004,,1209.8564,3806.1426,14599.47,19796.68,3586.0103,6339.78,10,7,6,11,13,5,5,2,7,12,13,6,9,Carbamidomethylation; Oxidation (M),44424.12,Dual specificity mitogen-activated protein kinase kinase 2 OS=Homo sapiens OX=9606 GN=MAP2K2 PE=1 SV=1
493,TRUE,P21964	COMT_HUMAN,266.6557,11,924.439,5248.3384,19394.451,10820.444,3225.4946,,,6148.5693,18872.086,17940.258,548.9473,1386.5793,11,4,6,16,13,7,2,5,6,8,9,4,5,Carbamidomethylation; Oxidation (M),30037.049,Catechol O-methyltransferase OS=Homo sapiens OX=9606 GN=COMT PE=1 SV=2
590,TRUE,Q8IZP0	ABI1_HUMAN,247.83348,9,2539.5337,9772.28,11565.33,12723.514,17979.492,952.4662,11065.036,20573.781,7341.2065,6400.848,1179.1049,3520.191,9,7,10,11,14,16,7,14,13,11,10,2,3,Oxidation (M); Carbamidomethylation,55080.84,Abl interactor 1 OS=Homo sapiens OX=9606 GN=ABI1 PE=1 SV=4
67,TRUE,P05787	K2C8_HUMAN,390.39334,41,16540.533,26996.994,64733.19,69246.195,12580.421,1745.0836,54235.527,72066.93,253346.4,257399.75,70876.03,101624.945,29,38,44,64,48,28,20,64,78,113,121,80,83,Oxidation (M),53704.242,"Keratin, type II cytoskeletal 8 OS=Homo sapiens OX=9606 GN=KRT8 PE=1 SV=7"
1377,TRUE,O95210	STBD1_HUMAN,87.76615,2,,,1034.4375,722.6468,,,,,,,,,2,2,,1,4,,,,,,,,,,39007.266,Starch-binding domain-containing protein 1 OS=Homo sapiens OX=9606 GN=STBD1 PE=1 SV=1
1277,TRUE,Q86TV6	TTC7B_HUMAN,135.61945,3,,,72.26686,,,,,74.62952,,,,,3,1,2,1,,2,,,4,,,,,Oxidation (M),94179.21,Tetratricopeptide repeat protein 7B OS=Homo sapiens OX=9606 GN=TTC7B PE=1 SV=3
206,TRUE,Q9H4M9	EHD1_HUMAN,296.5914,20,3054.299,7891.766,39099.594,25562.615,10319.178,688.34607,6653.2295,12447.701,46822.777,41444.688,6327.3125,9598.207,13,12,16,38,39,21,25,19,23,34,33,19,22,Oxidation (M); Carbamidomethylation,60626.86,EH domain-containing protein 1 OS=Homo sapiens OX=9606 GN=EHD1 PE=1 SV=2
1357,TRUE,O15169	AXIN1_HUMAN,76.90663,2,,,,,,,,,,,,,2,,,1,,,,,,,,,1,,95634.97,Axin-1 OS=Homo sapiens OX=9606 GN=AXIN1 PE=1 SV=2
1236,TRUE,Q99720	SGMR1_HUMAN,142.49568,3,246.55698,961.84265,2244.5732,1538.4604,,,,,8920.563,10203.954,319.05682,883.4794,3,1,2,7,4,,,,,6,6,2,2,,25127.69,Sigma non-opioid intracellular receptor 1 OS=Homo sapiens OX=9606 GN=SIGMAR1 PE=1 SV=1
21,TRUE,Q9NYQ8	FAT2_HUMAN,507.38736,93,53571.863,127885.25,91090.78,72309.84,99894.27,9787.066,50355.707,87788.77,93653.27,101358.445,50888.28,53233.18,93,99,141,116,104,122,62,94,102,117,102,110,96,Carbamidomethylation; Oxidation (M),479317.28,Protocadherin Fat 2 OS=Homo sapiens OX=9606 GN=FAT2 PE=1 SV=2
522,TRUE,Q9NP58	ABCB6_HUMAN,271.83954,11,,,4686.286,3201.1394,1423.2871,,189.08192,3109.0227,8800.338,14154.438,,,11,1,1,18,15,6,2,5,8,18,23,1,2,Oxidation (M),93885.555,"ATP-binding cassette sub-family B member 6, mitochondrial OS=Homo sapiens OX=9606 GN=ABCB6 PE=1 SV=1"
1198,TRUE,Q4KMP7	TB10B_HUMAN,112.477264,3,,,,,701.0905,,,,,,,,3,,,1,,2,,1,3,3,2,,,,87198.74,TBC1 domain family member 10B OS=Homo sapiens OX=9606 GN=TBC1D10B PE=1 SV=3
204,TRUE,Q9H4L5	OSBL3_HUMAN,325.8432,24,616.8112,2770.4775,13358.366,9074.936,3451.4897,171.12918,2855.7964,4773.4307,20988.418,19993.918,1886.1022,2558.923,23,7,13,19,19,11,6,8,13,23,29,13,10,Oxidation (M); Carbamidomethylation,101223.625,Oxysterol-binding protein-related protein 3 OS=Homo sapiens OX=9606 GN=OSBPL3 PE=1 SV=1
1250,TRUE,Q8IWW6	RHG12_HUMAN,123.37595,3,,,2816.5527,1755.0679,577.13336,,,758.80383,,,,,3,,1,1,1,3,,3,5,,2,,,,96254.43,Rho GTPase-activating protein 12 OS=Homo sapiens OX=9606 GN=ARHGAP12 PE=1 SV=1
679,TRUE,O14745	NHRF1_HUMAN,208.42522,9,,189.42316,5864.0034,4084.5164,11693.96,,4638.8896,8590.741,6362.1694,7151.0503,,579.2931,9,,3,2,3,8,5,6,11,5,7,2,2,Carbamidomethylation; Oxidation (M),38868.43,Na(+)/H(+) exchange regulatory cofactor NHE-RF1 OS=Homo sapiens OX=9606 GN=SLC9A3R1 PE=1 SV=4
130,TRUE,P27797	CALR_HUMAN,426.4745,33,3656.8662,18730.768,914625.6,659202.56,44160.08,9230.084,18991.117,39484.297,626810.06,802162.25,5052.554,4345.865,33,9,9,149,110,23,12,20,20,119,114,7,10,Carbamidomethylation; Oxidation (M),48141.555,Calreticulin OS=Homo sapiens OX=9606 GN=CALR PE=1 SV=1
74,TRUE,Q29RF7	PDS5A_HUMAN,408.27414,43,8323.934,16786.262,73897.555,53294.71,6525.169,,3315.81,7093.001,67598.31,60509.168,10490.779,15452.931,43,32,34,77,61,25,5,15,24,67,66,26,36,Carbamidomethylation; Oxidation (M); Acetylation (N-term),150830.16,Sister chromatid cohesion protein PDS5 homolog A OS=Homo sapiens OX=9606 GN=PDS5A PE=1 SV=1
338,TRUE,Q96J84	KIRR1_HUMAN,276.5559,15,2364.3215,6945.8154,2630.857,2016.2668,12485.075,707.27045,7783.8784,11065.836,10749.122,11195.091,12932.385,8494.417,15,13,17,11,9,21,8,24,16,13,19,13,23,Oxidation (M),83535.77,Kin of IRRE-like protein 1 OS=Homo sapiens OX=9606 GN=KIRREL1 PE=1 SV=2
244,TRUE,P04040	CATA_HUMAN,335.5771,21,168.04922,1239.9604,61888,45854.508,3761.8,,2010.4451,8061.8516,63415.508,73509.055,317.34818,1298.7731,21,2,7,30,30,12,9,7,11,29,27,4,6,Acetylation (N-term); Oxidation (M); Carbamidomethylation,59756.168,Catalase OS=Homo sapiens OX=9606 GN=CAT PE=1 SV=3
40,FALSE,Q58FG1	HS904_HUMAN,196.6472,6,,,,,3447.6118,,212.10501,,564.6885,1373.6099,,,2,12,12,29,33,21,15,26,20,40,36,16,14,Carbamidomethylation; Oxidation (M),47711.86,Putative heat shock protein HSP 90-alpha A4 OS=Homo sapiens OX=9606 GN=HSP90AA4P PE=5 SV=1
1284,TRUE,Q96P63	SPB12_HUMAN,103.09587,3,,189.29572,,1031.5264,,,240.99527,465.43982,,,,194.09482,2,2,2,1,2,1,1,3,4,,,2,1,,46276.418,Serpin B12 OS=Homo sapiens OX=9606 GN=SERPINB12 PE=1 SV=1
550,TRUE,P78536	ADA17_HUMAN,250.1734,10,8159.278,13081.168,9174.834,6831.032,18272.342,928.50024,10511.946,23801.81,14109.227,17627.877,13343.24,17608.854,10,11,12,11,8,18,8,13,11,14,20,12,12,Carbamidomethylation; Oxidation (M),93020.95,Disintegrin and metalloproteinase domain-containing protein 17 OS=Homo sapiens OX=9606 GN=ADAM17 PE=1 SV=1
43,TRUE,Q14008	CKAP5_HUMAN,411.95987,65,14207.3125,37619.945,64850.125,60564.78,29856.79,1020.09204,18842.64,49046.05,102012.55,83095.12,25248.072,32343.248,65,52,45,68,77,38,30,39,35,79,68,44,44,Oxidation (M); Carbamidomethylation,225494.55,Cytoskeleton-associated protein 5 OS=Homo sapiens OX=9606 GN=CKAP5 PE=1 SV=3
942,TRUE,Q14114	LRP8_HUMAN,192.44588,6,,,536.63806,,578.5595,,,694.25903,1376.4846,,,,5,2,2,4,,3,,1,1,4,,1,,,105633.61,Low-density lipoprotein receptor-related protein 8 OS=Homo sapiens OX=9606 GN=LRP8 PE=1 SV=4
353,TRUE,Q6ZRP7	QSOX2_HUMAN,300.558,18,131.6972,293.5114,27640.904,24056.197,55581.957,8267.861,28457.598,53761.96,32379.535,32630.445,412.54755,841.391,18,2,8,21,20,37,20,31,30,19,22,3,5,Carbamidomethylation; Oxidation (M),77528.734,Sulfhydryl oxidase 2 OS=Homo sapiens OX=9606 GN=QSOX2 PE=1 SV=3
261,TRUE,O75116	ROCK2_HUMAN,267.90344,21,,,4860.1924,3606.4055,2642.2595,,3531.2832,4537.3906,6696.6084,7138.0283,,3619.229,18,2,1,17,17,11,2,7,20,18,14,3,2,Oxidation (M),160899.83,Rho-associated protein kinase 2 OS=Homo sapiens OX=9606 GN=ROCK2 PE=1 SV=4
523,TRUE,P14735	IDE_HUMAN,176.51886,12,,,1768.3932,2061.5535,506.43436,,,1510.1484,3409.609,3215.2617,,,12,,,4,9,1,,3,4,8,8,,,Oxidation (M),117968.49,Insulin-degrading enzyme OS=Homo sapiens OX=9606 GN=IDE PE=1 SV=4
144,TRUE,P21796	VDAC1_HUMAN,448.45758,31,12939.677,26984.123,1186986.8,951924.3,27393.938,4109.5557,18350.742,18361.566,974091.25,894029.25,12996.742,13340.76,31,17,20,191,156,16,12,17,14,168,165,17,10,Carbamidomethylation; Oxidation (M),30772.59,Voltage-dependent anion-selective channel protein 1 OS=Homo sapiens OX=9606 GN=VDAC1 PE=1 SV=2
805,TRUE,Q9HBM0	VEZA_HUMAN,200.32422,8,1344.6215,3389.4177,2002.5994,1152.4563,386.36237,,,474.77014,1413.4548,987.03436,878.6472,1427.46,8,5,6,4,4,3,,1,2,3,1,2,4,Carbamidomethylation,88664.57,Vezatin OS=Homo sapiens OX=9606 GN=VEZT PE=1 SV=3
1269,TRUE,P11169	GTR3_HUMAN,138.5913,3,,,,,870.0951,,,211.4391,,,,,3,,,2,2,5,1,1,1,,,,,Oxidation (M),53924.266,"Solute carrier family 2, facilitated glucose transporter member 3 OS=Homo sapiens OX=9606 GN=SLC2A3 PE=1 SV=1"
260,TRUE,Q9Y4B5	MTCL1_HUMAN,240.31802,22,,1100.0652,4111.326,2774.3154,,,9015.4375,13270.042,11820.205,20278.5,2238.2258,2235.7734,22,,3,6,4,,,1,3,21,19,3,5,Oxidation (M),209525.98,Microtubule cross-linking factor 1 OS=Homo sapiens OX=9606 GN=MTCL1 PE=1 SV=5
72,FALSE,Q9UBC5	MYO1A_HUMAN,209.79715,5,8781.828,15570.193,18789,32091.854,24554.996,4363.8804,12954.734,21373.822,9481.404,34475.676,2998.9731,10346.781,3,5,7,18,17,13,9,13,11,8,14,4,6,Oxidation (M); Carbamidomethylation,118400.61,Unconventional myosin-Ia OS=Homo sapiens OX=9606 GN=MYO1A PE=1 SV=1
340,TRUE,Q8NE01	CNNM3_HUMAN,266.66983,18,327.3039,998.05475,5401.3994,2861.418,7550.984,132.2678,4109.647,5411.155,4628.293,4578.9414,,,17,2,3,18,11,24,9,15,16,17,16,,,Carbamidomethylation,76119.195,Metal transporter CNNM3 OS=Homo sapiens OX=9606 GN=CNNM3 PE=1 SV=1
422,TRUE,Q9UKS6	PACN3_HUMAN,288.46692,14,3979.5586,6042.8784,15028.081,11757.708,11956.838,,3834.334,12132.409,16775.25,16053.025,4034.9126,4889.2944,14,9,7,20,13,19,5,9,8,15,21,5,5,Oxidation (M); Carbamidomethylation,48486.797,Protein kinase C and casein kinase substrate in neurons protein 3 OS=Homo sapiens OX=9606 GN=PACSIN3 PE=1 SV=2
332,TRUE,P08648	ITA5_HUMAN,349.05463,18,27658.934,70370.41,31059.682,21062.533,60969.812,6253.561,54781.023,128374.68,87266.43,93895.37,79539.53,118634.05,18,36,42,29,25,37,24,37,53,38,37,44,45,Oxidation (M),114536.49,Integrin alpha-5 OS=Homo sapiens OX=9606 GN=ITGA5 PE=1 SV=2
127,TRUE,Q92797	SYMPK_HUMAN,366.17108,31,503.44547,3011.1963,53251.41,31472.459,1656.8375,116.14269,727.73267,2619.5908,19378.918,24568.363,948.92773,1107.4232,31,4,10,61,57,5,6,4,8,29,34,4,5,Oxidation (M); Carbamidomethylation,141148.38,Symplekin OS=Homo sapiens OX=9606 GN=SYMPK PE=1 SV=2
541,FALSE,P16157	ANK1_HUMAN,75.80757,2,,,,,,,,,270.469,,,,2,,,,,,,,,1,,,1,,206264.77,Ankyrin-1 OS=Homo sapiens OX=9606 GN=ANK1 PE=1 SV=3
308,TRUE,Q99714	HCD2_HUMAN,326.283,16,992.1658,5069.3843,54107.29,36681.863,46211.418,5282.8794,9731.5625,17416.828,42697.25,43672.387,362.15063,1354.2714,16,12,19,53,49,43,35,22,31,42,40,8,11,Oxidation (M); Carbamidomethylation,26923.08,3-hydroxyacyl-CoA dehydrogenase type-2 OS=Homo sapiens OX=9606 GN=HSD17B10 PE=1 SV=3
690,TRUE,Q96D53	COQ8B_HUMAN,240.16779,9,,394.26477,6689.131,3694.3848,2489.498,,839.7711,199.43945,5247.3643,5447.9653,,118.38031,9,3,1,11,10,14,1,2,4,11,9,2,1,Carbamidomethylation,60069.46,"Atypical kinase COQ8B, mitochondrial OS=Homo sapiens OX=9606 GN=COQ8B PE=1 SV=2"
571,TRUE,O43865	SAHH2_HUMAN,196.43434,8,,1289.7245,6301.4507,3359.144,3274.3384,253.61696,1675.1841,5058.384,11940.973,10737.644,858.18195,1453.0599,8,,2,7,5,6,3,5,6,18,16,2,2,Carbamidomethylation; Oxidation (M),58951.42,S-adenosylhomocysteine hydrolase-like protein 1 OS=Homo sapiens OX=9606 GN=AHCYL1 PE=1 SV=2
1129,TRUE,Q9H2H9	S38A1_HUMAN,149.9757,4,,2686.902,8463.383,6738.665,20947.66,5036.146,15873.848,25405.814,15999.344,17273.457,2837.2246,3526.3481,4,1,2,3,3,5,5,5,4,7,7,2,1,Carbamidomethylation,54047.598,Sodium-coupled neutral amino acid transporter 1 OS=Homo sapiens OX=9606 GN=SLC38A1 PE=1 SV=1
1276,TRUE,Q9UGK3	STAP2_HUMAN,124.77592,3,,,,292.12503,331.58215,,381.77252,1024.4307,1906.9646,2124.8706,,617.0509,3,,,2,3,1,,1,2,2,3,,1,,44893.68,Signal-transducing adaptor protein 2 OS=Homo sapiens OX=9606 GN=STAP2 PE=1 SV=2
558,TRUE,Q8N3R9	MPP5_HUMAN,230.07584,11,,1461.6819,4343.9443,1783.5138,1569.3574,,835.4708,1808.3992,2979.0488,2618.653,848.2641,970.66455,11,4,10,15,11,11,4,7,11,12,10,5,8,Oxidation (M),77293.54,MAGUK p55 subfamily member 5 OS=Homo sapiens OX=9606 GN=MPP5 PE=1 SV=3
814,TRUE,O60291	MGRN1_HUMAN,190.91023,6,555.31055,2474.0059,1324.7947,539.4996,446.95624,,602.7689,1681.122,2834.15,1594.6371,1106.67,2106.4497,6,5,4,4,2,5,1,5,4,5,4,3,5,Carbamidomethylation; Oxidation (M),60752.98,E3 ubiquitin-protein ligase MGRN1 OS=Homo sapiens OX=9606 GN=MGRN1 PE=1 SV=2
505,TRUE,P10321	HLAC_HUMAN,311.39133,13,2443.1113,3289.256,12289.006,9206.691,7025.7734,,1805.1544,1410.3461,6192.0054,5894.301,1192.5901,1788.099,5,17,18,30,29,27,23,15,20,30,25,16,9,Carbamidomethylation,40648.53,"HLA class I histocompatibility antigen, C alpha chain OS=Homo sapiens OX=9606 GN=HLA-C PE=1 SV=3"
49,TRUE,P49368	TCPG_HUMAN,440.50748,44,881443.5,1444544.2,434100.34,333380.38,322885.38,79506.18,190074.44,305021.97,475135.78,449223.16,616326.56,705599.5,44,188,220,114,115,98,55,83,81,122,111,136,130,Oxidation (M); Carbamidomethylation,60533.883,T-complex protein 1 subunit gamma OS=Homo sapiens OX=9606 GN=CCT3 PE=1 SV=4
784,TRUE,P43007	SATT_HUMAN,239.6384,8,,,4115.702,5161.817,16635.346,2577.2036,6694.954,14611.463,6795.6094,7470.23,,,7,,1,9,12,15,13,9,11,9,8,,,Carbamidomethylation,55723.074,Neutral amino acid transporter A OS=Homo sapiens OX=9606 GN=SLC1A4 PE=1 SV=1
1170,TRUE,Q13572	ITPK1_HUMAN,144.2344,3,,207.02954,1338.644,423.165,226.19504,,,,811.27325,289.46213,,,3,,2,5,5,1,,,,3,3,,,,45621.047,Inositol-tetrakisphosphate 1-kinase OS=Homo sapiens OX=9606 GN=ITPK1 PE=1 SV=2
304,TRUE,P15531	NDKA_HUMAN,265.25266,14,2099.6863,7968.726,145008.23,91902.41,35740.582,3054.0977,32870.34,61949.32,205444.31,214005.39,6718.291,10595.822,14,12,13,38,31,21,10,31,29,56,47,14,19,Oxidation (M); Carbamidomethylation,17148.72,Nucleoside diphosphate kinase A OS=Homo sapiens OX=9606 GN=NME1 PE=1 SV=1
876,TRUE,P53794	SC5A3_HUMAN,105.36462,4,,,,,756.8779,,,542.3077,,,,,4,,,,,4,2,1,3,1,1,,,Oxidation (M),79693.875,Sodium/myo-inositol cotransporter OS=Homo sapiens OX=9606 GN=SLC5A3 PE=1 SV=2
1212,TRUE,P15941	MUC1_HUMAN,71.42445,3,,,,,,,,942.6087,,,,,3,,,,,,,,4,,,,,,122102.29,Mucin-1 OS=Homo sapiens OX=9606 GN=MUC1 PE=1 SV=3
582,TRUE,O15260	SURF4_HUMAN,221.39514,6,175.66507,6873.1895,50127.94,35590.06,2426.146,,287.3085,2996.5464,38242.824,34304.074,3313.2642,3881.6335,6,11,14,31,29,8,3,7,6,22,26,10,12,Oxidation (M); Carbamidomethylation,30393.996,Surfeit locus protein 4 OS=Homo sapiens OX=9606 GN=SURF4 PE=1 SV=3
284,TRUE,Q04917	1433F_HUMAN,292.76492,16,27917.445,46218.586,252937.03,207916.95,222979,71157.48,164109.19,237258.44,235982.34,227924.64,32062.3,36731.984,16,10,26,69,58,72,35,60,86,69,55,14,14,Oxidation (M); Carbamidomethylation; Acetylation (N-term),28218.72,14-3-3 protein eta OS=Homo sapiens OX=9606 GN=YWHAH PE=1 SV=4
150,TRUE,P06756	ITAV_HUMAN,356.89047,26,71661.42,107322.11,65653.33,57439.293,107719.305,23407.799,194394.78,244410.95,172662.22,183380.94,206948.7,267173.9,26,58,55,36,44,60,53,78,80,51,48,71,76,Oxidation (M),116037.86,Integrin alpha-V OS=Homo sapiens OX=9606 GN=ITGAV PE=1 SV=2
238,TRUE,P23471	PTPRZ_HUMAN,300.8961,22,11276.859,33437.81,13140.234,6527.7773,26382.262,1282.3481,8085.425,18216.238,10391.974,9689.173,6321.0947,8773.213,22,19,28,14,13,34,13,19,23,13,10,15,13,Oxidation (M),254587.27,Receptor-type tyrosine-protein phosphatase zeta OS=Homo sapiens OX=9606 GN=PTPRZ1 PE=1 SV=4
726,TRUE,P10301	RRAS_HUMAN,234.6432,7,1771.5576,4726.1836,3572.6714,6915.9297,3589.5874,,1312.1582,2567.933,8257.1,10345.396,1093.999,4038.2827,5,7,8,7,5,5,3,7,9,5,9,8,6,Carbamidomethylation; Oxidation (M),23480.488,Ras-related protein R-Ras OS=Homo sapiens OX=9606 GN=RRAS PE=1 SV=1
1103,TRUE,Q29980	MICB_HUMAN,137.78328,4,127.272995,,,,59.62667,,,,,,,161.16357,4,1,1,,,2,,1,2,,,1,2,,42574.97,MHC class I polypeptide-related sequence B OS=Homo sapiens OX=9606 GN=MICB PE=1 SV=2
560,TRUE,Q06481	APLP2_HUMAN,243.12312,11,985.6151,2986.169,3561.0654,2494.1677,7273.9097,208.0059,1457.6184,5415.393,3910.8684,4133.128,2680.3145,2605.8694,11,6,14,10,4,13,2,5,8,9,9,5,8,Oxidation (M),86955.77,Amyloid-like protein 2 OS=Homo sapiens OX=9606 GN=APLP2 PE=1 SV=2
797,TRUE,P48047	ATPO_HUMAN,197.38,8,246.644,758.2856,12399.545,19506.344,2688.0562,484.30072,747.84174,1551.2174,23155.068,11276.127,192.32155,646.4527,8,1,1,8,9,3,3,1,1,8,7,4,1,Carbamidomethylation,23277.312,"ATP synthase subunit O, mitochondrial OS=Homo sapiens OX=9606 GN=ATP5PO PE=1 SV=1"
1372,TRUE,Q9BX95	SGPP1_HUMAN,80.07929,2,,,2675.674,1996.6338,,,,,1695.7914,1690.1836,122.38492,,2,,,3,3,,,,,4,2,1,,,49107.746,Sphingosine-1-phosphate phosphatase 1 OS=Homo sapiens OX=9606 GN=SGPP1 PE=1 SV=2
1035,TRUE,Q9BZM5	ULBP2_HUMAN,149.34178,5,1907.4678,1126.1963,4473.813,3422.2754,7271.6646,,1345.1527,489.79965,704.8816,964.644,789.43115,119.31489,5,4,3,3,2,4,4,1,2,3,2,2,2,Carbamidomethylation,27367.916,UL16-binding protein 2 OS=Homo sapiens OX=9606 GN=ULBP2 PE=1 SV=1
316,TRUE,O75330	HMMR_HUMAN,272.58212,19,1753.5442,7580.325,3468.4749,12013.785,6822.116,,,5745.6157,22412.432,8908.758,8188.619,4907.536,19,10,12,16,11,7,1,5,12,19,16,15,15,Carbamidomethylation; Acetylation (N-term),84100.43,Hyaluronan mediated motility receptor OS=Homo sapiens OX=9606 GN=HMMR PE=1 SV=2
941,TRUE,Q9H4A6	GOLP3_HUMAN,186.86932,5,,,8461.827,7477.355,,732.5327,,,3991.162,3207.824,,,5,,2,10,9,2,1,1,5,11,8,1,1,Oxidation (M); Carbamidomethylation,33810.53,Golgi phosphoprotein 3 OS=Homo sapiens OX=9606 GN=GOLPH3 PE=1 SV=1
360,TRUE,Q9BYT8	NEUL_HUMAN,278.0668,16,,,9055.1455,12132.245,9670.934,562.0519,7329.119,16509.63,27802.707,17304.156,,196.73471,16,,,13,11,19,13,14,16,21,22,,2,Oxidation (M); Carbamidomethylation,80651.77,"Neurolysin, mitochondrial OS=Homo sapiens OX=9606 GN=NLN PE=1 SV=1"
412,TRUE,Q9UEW8	STK39_HUMAN,268.18826,12,5136.7466,11448.682,28485.555,17757.07,7796.2812,355.14697,3698.1387,6601.153,26539.914,26951.268,2879.2617,3180.7744,12,6,14,24,22,10,7,11,16,17,15,12,12,Oxidation (M); Carbamidomethylation,59474.016,STE20/SPS1-related proline-alanine-rich protein kinase OS=Homo sapiens OX=9606 GN=STK39 PE=1 SV=3
1234,TRUE,Q92796	DLG3_HUMAN,137.53389,3,,,682.2404,273.5725,,,,,,,,,2,1,2,3,3,1,1,2,1,3,3,,,Carbamidomethylation,90313.98,Disks large homolog 3 OS=Homo sapiens OX=9606 GN=DLG3 PE=1 SV=2
183,TRUE,Q9H307	PININ_HUMAN,320.7948,24,586.4605,5923.323,100023.625,75888.57,22696.076,3530.1707,7418.416,13890.871,72422.56,83601.05,1175.4005,2195.1138,24,6,10,38,44,18,15,20,14,40,34,5,8,Oxidation (M),81627.72,Pinin OS=Homo sapiens OX=9606 GN=PNN PE=1 SV=5
1163,TRUE,Q9H3Z4	DNJC5_HUMAN,174.78786,3,781.00415,2169.9246,16759.775,11786.656,1437.318,,421.83185,1066.7948,9057.879,9401.115,824.1149,1196.9263,3,1,1,5,7,2,4,2,2,2,2,1,1,,22148.77,DnaJ homolog subfamily C member 5 OS=Homo sapiens OX=9606 GN=DNAJC5 PE=1 SV=1
19,TRUE,P63261	ACTG_HUMAN,543.5614,83,,,10956.296,6935.1816,202.13278,,319.99277,958.5186,12322.887,12857.3545,,,2,157,184,505,415,181,123,184,218,475,460,171,189,Acetylation (N-term); Oxidation (M); Carbamidomethylation,41792.836,"Actin, cytoplasmic 2 OS=Homo sapiens OX=9606 GN=ACTG1 PE=1 SV=1"
566,TRUE,P01112	RASH_HUMAN,217.67932,10,,,1055.6743,226.01303,859.49567,,,,,,,,2,4,10,16,10,9,6,6,6,13,12,3,2,Oxidation (M); Carbamidomethylation,21298.129,GTPase HRas OS=Homo sapiens OX=9606 GN=HRAS PE=1 SV=1
825,TRUE,Q9NR80	ARHG4_HUMAN,157.34712,6,319.12973,1889.2014,1548.2451,1309.4204,,,,,73.24562,,,572.68445,6,4,7,5,4,,,,,1,2,1,2,Oxidation (M),79066.54,Rho guanine nucleotide exchange factor 4 OS=Homo sapiens OX=9606 GN=ARHGEF4 PE=1 SV=3
135,TRUE,Q14160	SCRIB_HUMAN,356.19955,34,16452.139,30926.035,42727.195,30542.18,55486.02,4661.54,43131.176,81975.766,33931.87,39089.582,21029.691,22091.67,34,30,44,48,40,55,39,52,64,38,40,39,34,Oxidation (M); Carbamidomethylation,174884.98,Protein scribble homolog OS=Homo sapiens OX=9606 GN=SCRIB PE=1 SV=4
313,TRUE,Q9Y624	JAM1_HUMAN,326.6728,16,59474.773,82567.484,90044.945,80984.22,75147.66,17110.867,74421.195,106401.31,164813.19,173647.78,93648.805,110971.65,16,48,34,48,35,35,20,33,34,58,65,46,51,Carbamidomethylation; Oxidation (M),32583.13,Junctional adhesion molecule A OS=Homo sapiens OX=9606 GN=F11R PE=1 SV=1
30,TRUE,Q14573	ITPR3_HUMAN,444.10974,73,15703.721,33073.215,112640.766,72703.14,5730.4883,,1608.1506,3319.9397,70251.12,70707.03,9033.131,18502.197,67,46,74,135,101,22,12,6,15,85,91,34,36,Oxidation (M); Carbamidomethylation,304106.47,"Inositol 1,4,5-trisphosphate receptor type 3 OS=Homo sapiens OX=9606 GN=ITPR3 PE=1 SV=2"
1351,TRUE,Q9Y5K8	VATD_HUMAN,103.414154,2,,,1968.4858,3518.1714,,,,,,,,,2,,,2,3,,,,,,,,,,28262.83,V-type proton ATPase subunit D OS=Homo sapiens OX=9606 GN=ATP6V1D PE=1 SV=1
633,TRUE,Q9NYT0	PLEK2_HUMAN,218.89296,9,328.73752,20051.918,89356.91,75012.7,14562.407,596.75757,521.26544,2343.088,18147.979,62444.734,11542.424,1466.9961,9,3,6,8,5,7,5,2,4,12,10,4,5,Acetylation (N-term); Oxidation (M),39970.832,Pleckstrin-2 OS=Homo sapiens OX=9606 GN=PLEK2 PE=1 SV=1
933,TRUE,Q9P246	STIM2_HUMAN,171.51947,6,497.89008,1541.9194,1416.8271,727.70355,498.82538,,,,498.0643,520.16223,,,5,3,7,5,4,3,,,,2,1,1,,,83971.11,Stromal interaction molecule 2 OS=Homo sapiens OX=9606 GN=STIM2 PE=1 SV=2
706,TRUE,Q13418	ILK_HUMAN,192.95132,7,19574.68,1505.2874,11200.9795,9469.85,31996.56,,1194.9886,2550.7407,14111.4375,1283.3516,958.28625,1130.332,7,5,2,5,7,8,,7,5,9,5,3,3,Oxidation (M),51419.19,Integrin-linked protein kinase OS=Homo sapiens OX=9606 GN=ILK PE=1 SV=2
1410,TRUE,Q86T03	PP4P1_HUMAN,81.81406,2,376.89426,718.41986,,,1389.5077,,467.3512,,695.30255,,,,2,1,1,1,,1,2,1,,2,1,,,Carbamidomethylation,29469.584,"Type 1 phosphatidylinositol 4,5-bisphosphate 4-phosphatase OS=Homo sapiens OX=9606 GN=PIP4P1 PE=1 SV=1"
151,TRUE,Q9Y5S2	MRCKB_HUMAN,340.90305,32,3109.254,14025.193,11874.445,4777.5454,7133.987,,4961.417,14523.107,16779.832,17005.215,1940.1676,4119.1626,32,16,29,29,22,26,5,29,28,34,29,13,20,Oxidation (M); Carbamidomethylation,194315.31,Serine/threonine-protein kinase MRCK beta OS=Homo sapiens OX=9606 GN=CDC42BPB PE=1 SV=2
61,TRUE,O15031	PLXB2_HUMAN,450.8188,46,116299.93,212362.47,105253.91,78055.58,147349.28,25099.42,109758.74,210249.39,183600.69,188810.72,144715.42,230867.8,45,91,101,80,65,96,55,84,91,89,90,99,104,Oxidation (M); Carbamidomethylation,205127.2,Plexin-B2 OS=Homo sapiens OX=9606 GN=PLXNB2 PE=1 SV=3
1062,TRUE,P62993	GRB2_HUMAN,157.99283,4,69.30466,254.657,971.7402,520.4567,1142.7206,,506.12433,967.01996,3843.0356,2757.704,1046.5537,1558.8811,4,3,3,3,5,4,1,3,3,4,4,3,4,Carbamidomethylation,25206.348,Growth factor receptor-bound protein 2 OS=Homo sapiens OX=9606 GN=GRB2 PE=1 SV=1
402,TRUE,Q9NTJ5	SAC1_HUMAN,236.02708,13,167.92546,1755.1368,14088.389,10233.023,1191.405,,413.85052,1242.7068,14268.793,12652.754,420.50677,396.3816,13,1,6,10,14,7,1,3,6,17,17,5,2,Oxidation (M); Carbamidomethylation,66966.89,Phosphatidylinositol-3-phosphatase SAC1 OS=Homo sapiens OX=9606 GN=SACM1L PE=1 SV=2
57,TRUE,P53618	COPB_HUMAN,416.18964,46,34332.36,97345.57,235759.23,191399.33,80858.9,10728.994,65175.086,98972.5,210910.84,263130.4,60083.887,67784.55,46,51,55,104,100,63,41,53,59,96,97,50,46,Carbamidomethylation; Oxidation (M),107142.22,Coatomer subunit beta OS=Homo sapiens OX=9606 GN=COPB1 PE=1 SV=3
1035,FALSE,Q6H3X3	ULBP5_HUMAN,76.282425,2,,311.87744,261.8043,,186.70856,,,,,,,,2,2,1,1,,1,1,,,,,,,Carbamidomethylation,37105.906,UL-16 binding protein 5 OS=Homo sapiens OX=9606 GN=RAET1G PE=1 SV=1
251,TRUE,P04083	ANXA1_HUMAN,378.5074,20,15737.789,29864.74,359420.22,304545.94,72883.266,9476.885,39285.88,69175.1,365695.34,337104.47,18780.316,23140.637,20,12,16,55,48,24,18,22,29,65,65,21,26,Oxidation (M); Carbamidomethylation,38714.242,Annexin A1 OS=Homo sapiens OX=9606 GN=ANXA1 PE=1 SV=2
795,TRUE,P08134	RHOC_HUMAN,227.63155,8,1127.6749,1974.1342,7989.5684,7639.685,,,,406.48294,15299.559,9772.245,,1919.1345,4,2,7,11,6,3,,2,3,15,7,1,6,Carbamidomethylation,22006.357,Rho-related GTP-binding protein RhoC OS=Homo sapiens OX=9606 GN=RHOC PE=1 SV=1
1092,TRUE,O43813	LANC1_HUMAN,123.39082,4,,871.6286,,,2005.228,,1541.4673,2124.4197,823.1521,694.15234,,,4,,1,1,,1,,4,1,1,2,1,,Carbamidomethylation,45283.094,Glutathione S-transferase LANCL1 OS=Homo sapiens OX=9606 GN=LANCL1 PE=1 SV=1
1197,TRUE,Q13642	FHL1_HUMAN,131.31393,3,741.0719,2568.6807,,,1657.0388,,1353.4861,1697.7529,1793.271,2194.3936,3099.982,2354.9175,3,3,2,,,2,3,2,2,4,3,2,5,Carbamidomethylation,36263.02,Four and a half LIM domains protein 1 OS=Homo sapiens OX=9606 GN=FHL1 PE=1 SV=4
782,TRUE,P21283	VATC1_HUMAN,205.49542,7,,,7999.0854,5849.3975,807.52747,,514.75977,630.8352,3864.469,1875.0797,,291.9247,7,1,1,9,9,4,1,1,2,6,8,1,1,Oxidation (M); Carbamidomethylation,43941.605,V-type proton ATPase subunit C 1 OS=Homo sapiens OX=9606 GN=ATP6V1C1 PE=1 SV=4
131,TRUE,O00429	DNM1L_HUMAN,390.38998,30,520.5313,1897.8967,24875.367,16626.871,7511.619,,9941.527,18539.037,64769.176,65932.92,2839.2341,4757.106,30,8,19,43,37,22,4,25,23,54,66,21,20,Oxidation (M); Carbamidomethylation,81877.15,Dynamin-1-like protein OS=Homo sapiens OX=9606 GN=DNM1L PE=1 SV=2
331,TRUE,Q8NFD5	ARI1B_HUMAN,298.3426,19,130.53542,1556.4456,5343.763,403.71515,,,,,5240.23,7225.136,263.15985,152.30685,19,6,6,14,12,,,,,20,16,5,4,Carbamidomethylation; Oxidation (M),236123.39,AT-rich interactive domain-containing protein 1B OS=Homo sapiens OX=9606 GN=ARID1B PE=1 SV=2
1362,TRUE,Q14289	FAK2_HUMAN,76.99083,2,,,598.0542,,,,,,,511.28088,,,2,,,3,,,,,,,2,,,,115874.6,Protein-tyrosine kinase 2-beta OS=Homo sapiens OX=9606 GN=PTK2B PE=1 SV=2
1108,TRUE,P46020	KPB1_HUMAN,151.57788,4,,,314.23883,293.47955,,,,,508.19604,639.0048,,,4,,,1,2,,,,,3,3,,,Carbamidomethylation,137311.97,"Phosphorylase b kinase regulatory subunit alpha, skeletal muscle isoform OS=Homo sapiens OX=9606 GN=PHKA1 PE=1 SV=2"
991,TRUE,Q6UVK1	CSPG4_HUMAN,161.02946,5,,1250.4752,,,742.0573,,,,274.16296,782.5892,1073.6595,,5,,1,,,1,,3,1,4,3,4,2,Acetylation (N-term),250536.77,Chondroitin sulfate proteoglycan 4 OS=Homo sapiens OX=9606 GN=CSPG4 PE=1 SV=2
1265,FALSE,Q969Q0	RL36L_HUMAN,95.34468,2,,,811.78455,,,,,,6363.657,6225.801,456.08926,,2,1,,3,2,,,,,2,3,1,1,Carbamidomethylation,12468.83,60S ribosomal protein L36a-like OS=Homo sapiens OX=9606 GN=RPL36AL PE=1 SV=3
898,TRUE,P15260	INGR1_HUMAN,215.25917,6,1548.8191,4350.941,2655.3965,1731.7249,4199.5356,378.97324,3575.0388,6056.0576,5578.777,6828.4883,3995.5044,2773.6033,6,6,8,8,5,5,3,6,7,11,8,5,6,,54404.547,Interferon gamma receptor 1 OS=Homo sapiens OX=9606 GN=IFNGR1 PE=1 SV=1
1070,TRUE,P48067	SC6A9_HUMAN,149.90477,4,,610.09436,346.0988,,1811.6354,,3137.5056,3074.7046,2670.6787,2948.0254,2956.754,,4,,1,1,1,3,3,3,3,5,2,5,1,,78260.34,Sodium- and chloride-dependent glycine transporter 1 OS=Homo sapiens OX=9606 GN=SLC6A9 PE=1 SV=3
38,FALSE,Q58FF8	H90B2_HUMAN,286.74496,16,380.83246,1498.4386,11406.85,22782.467,,6510.1733,1299.9608,1852.3848,4304.6284,4592.5234,1557.7051,1282.6973,2,30,28,58,58,36,26,41,43,60,60,33,31,Oxidation (M),44348.92,Putative heat shock protein HSP 90-beta 2 OS=Homo sapiens OX=9606 GN=HSP90AB2P PE=1 SV=2
686,TRUE,Q99549	MPP8_HUMAN,190.81169,8,,,1785.3949,1072.1594,,,,,3094.1748,3676.0784,,211.19049,8,1,3,3,5,1,,,1,8,7,1,1,Oxidation (M); Carbamidomethylation,97182.234,M-phase phosphoprotein 8 OS=Homo sapiens OX=9606 GN=MPHOSPH8 PE=1 SV=2
612,TRUE,Q8WVQ1	CANT1_HUMAN,233.17482,10,,,2515.453,1668.4636,8363.491,186.83118,325.94568,168.50842,,,,,10,,,9,10,18,8,2,2,3,,,,Oxidation (M),44839.598,Soluble calcium-activated nucleotidase 1 OS=Homo sapiens OX=9606 GN=CANT1 PE=1 SV=1
979,TRUE,Q68D85	NR3L1_HUMAN,136.37196,5,,,884.3911,223.64926,1807.7744,,364.3063,968.10547,,,,,5,,1,2,1,4,1,2,2,1,1,,,Oxidation (M),50827.156,Natural cytotoxicity triggering receptor 3 ligand 1 OS=Homo sapiens OX=9606 GN=NCR3LG1 PE=1 SV=1
63,TRUE,P16615	AT2A2_HUMAN,459.45578,45,106080.75,200887.23,705024.5,528049.5,187309.45,40354.766,83385.45,118225.46,489112.16,524200.72,108619.72,130103.664,45,63,69,145,133,78,46,56,60,130,111,66,63,Oxidation (M); Carbamidomethylation,114756.86,Sarcoplasmic/endoplasmic reticulum calcium ATPase 2 OS=Homo sapiens OX=9606 GN=ATP2A2 PE=1 SV=1
643,TRUE,P36897	TGFR1_HUMAN,234.17375,8,1857.5239,3751.0933,3682.7075,2521.4524,5153.1855,,1224.3176,3652.8042,2536.7925,14361.218,1374.7063,1310.6029,8,4,8,9,6,10,7,7,9,10,10,6,3,Oxidation (M),55959.74,TGF-beta receptor type-1 OS=Homo sapiens OX=9606 GN=TGFBR1 PE=1 SV=1
1312,TRUE,Q99523	SORT_HUMAN,81.35208,2,,,,,410.91748,,,,,,,,2,,,,,2,,,,,,,,,92067.69,Sortilin OS=Homo sapiens OX=9606 GN=SORT1 PE=1 SV=3
908,TRUE,Q96AE7	TTC17_HUMAN,160.22618,6,,460.15857,325.43857,203.49962,1078.0635,,,206.52559,430.06787,433.2595,181.46834,143.33145,6,,1,2,1,5,1,,1,3,4,1,1,,129558.41,Tetratricopeptide repeat protein 17 OS=Homo sapiens OX=9606 GN=TTC17 PE=1 SV=1
923,TRUE,O00165	HAX1_HUMAN,184.3031,6,,,3276.272,2970.7769,,,,,2213.7686,1554.4452,,61.893215,6,,,6,4,,,,,5,4,,3,,31620.516,HCLS1-associated protein X-1 OS=Homo sapiens OX=9606 GN=HAX1 PE=1 SV=2
1042,TRUE,P10644	KAP0_HUMAN,111.20489,5,,,1295.3931,1188.3356,,,,,714.3019,1096.2146,,,5,,,4,1,,,,,2,4,,,Carbamidomethylation,42981.69,cAMP-dependent protein kinase type I-alpha regulatory subunit OS=Homo sapiens OX=9606 GN=PRKAR1A PE=1 SV=1
23,TRUE,Q14980	NUMA1_HUMAN,508.72858,94,25705.793,67719.57,153614.86,110250.28,9812.527,,3351.3591,11044.877,162391.36,181881.52,29100.623,41305.02,94,81,110,151,131,43,13,31,50,151,149,83,84,Oxidation (M); Carbamidomethylation,238259.5,Nuclear mitotic apparatus protein 1 OS=Homo sapiens OX=9606 GN=NUMA1 PE=1 SV=2
597,TRUE,P18564	ITB6_HUMAN,267.6118,11,12173.333,32090.959,13396.464,12068.324,32776.574,4996.564,35402.19,77165.38,49807.72,43267.098,49599.145,61735.61,9,8,10,10,5,13,6,10,21,14,17,16,23,Carbamidomethylation; Oxidation (M),85935.984,Integrin beta-6 OS=Homo sapiens OX=9606 GN=ITGB6 PE=1 SV=2
126,TRUE,Q8IUD2	RB6I2_HUMAN,295.701,33,522.31384,4228.1665,24605.203,16583.758,3906.2217,,2465.3093,4319.3306,28130.602,34240.445,2569.4634,3875.8884,29,15,12,37,31,11,8,10,16,38,36,12,10,Oxidation (M); Carbamidomethylation,128086.39,ELKS/Rab6-interacting/CAST family member 1 OS=Homo sapiens OX=9606 GN=ERC1 PE=1 SV=1
464,TRUE,O95235	KI20A_HUMAN,266.2411,13,172.60785,3310.5276,2142.102,2401.1982,386.1171,,,195.07452,3243.2676,2763.2744,568.2236,1461.5009,13,10,13,20,11,2,,,2,11,12,2,6,Oxidation (M); Carbamidomethylation,100277.96,Kinesin-like protein KIF20A OS=Homo sapiens OX=9606 GN=KIF20A PE=1 SV=1
210,TRUE,Q32MZ4	LRRF1_HUMAN,333.53656,24,2473.4824,7378.292,23468.795,18129.014,10241.293,428.43918,10146.953,15235.834,42540.844,51256.67,14509.066,20161.98,24,20,21,20,25,17,8,23,27,44,46,25,30,Oxidation (M); Carbamidomethylation,89253.02,Leucine-rich repeat flightless-interacting protein 1 OS=Homo sapiens OX=9606 GN=LRRFIP1 PE=1 SV=2
455,TRUE,O60443	GSDME_HUMAN,251.19667,13,450.46283,2239.8623,3791.5884,3788.989,1402.3379,136.71146,1528.6289,4557.749,12138.877,7619.851,1907.4661,3043.3396,13,4,4,9,10,4,7,5,9,17,13,11,10,Carbamidomethylation; Oxidation (M),54554.934,Gasdermin-E OS=Homo sapiens OX=9606 GN=GSDME PE=1 SV=2
98,TRUE,Q9UIQ6	LCAP_HUMAN,378.26566,32,18274.709,39021.24,68574.75,48524.418,65032.797,10409.19,20978.059,31703.943,63496.04,66499.95,17086.592,21501.488,31,32,48,71,59,62,37,28,39,57,58,26,25,Carbamidomethylation; Oxidation (M),117349.1,Leucyl-cystinyl aminopeptidase OS=Homo sapiens OX=9606 GN=LNPEP PE=1 SV=3
1000,TRUE,Q12774	ARHG5_HUMAN,143.04868,5,,,,,,,,,,414.4914,,,5,1,5,2,1,1,,,,2,2,,,Oxidation (M),176799.48,Rho guanine nucleotide exchange factor 5 OS=Homo sapiens OX=9606 GN=ARHGEF5 PE=1 SV=3
367,TRUE,P42892	ECE1_HUMAN,276.38672,14,2185.9812,4272.593,11475.646,7790.255,7948.5835,1018.21985,3547.8735,10276.165,17609.428,21279.168,2767.8926,3949.4434,14,16,22,25,20,28,12,23,22,25,20,11,15,Oxidation (M),87163.67,Endothelin-converting enzyme 1 OS=Homo sapiens OX=9606 GN=ECE1 PE=1 SV=2
1056,TRUE,Q9HBL7	PLRKT_HUMAN,123.27031,3,,,2817.1514,1504.7014,,,,,2801.473,2393.9058,,,3,,,6,7,,,,,4,2,,,Oxidation (M),17201.312,Plasminogen receptor (KT) OS=Homo sapiens OX=9606 GN=PLGRKT PE=1 SV=1
1225,TRUE,Q14019	COTL1_HUMAN,129.80702,3,,,1549.6279,628.68304,,,,,5068.3467,3782.5813,,,3,,,4,5,,,,,5,3,,,Carbamidomethylation,15944.978,Coactosin-like protein OS=Homo sapiens OX=9606 GN=COTL1 PE=1 SV=3
168,FALSE,P13796	PLSL_HUMAN,182.74767,8,448.52454,711.47955,16955.904,11249.847,2793.186,349.17792,2032.9453,1997.8376,10561.074,8140.418,980.10443,541.7081,8,3,2,17,14,3,5,4,7,9,8,5,5,Carbamidomethylation; Oxidation (M),70288.39,Plastin-2 OS=Homo sapiens OX=9606 GN=LCP1 PE=1 SV=6
1118,TRUE,P21128	ENDOU_HUMAN,171.17604,4,,,2466.1323,1680.5354,,,,,,,,,4,,,4,4,,,,,,,,,,46872.277,Poly(U)-specific endoribonuclease OS=Homo sapiens OX=9606 GN=ENDOU PE=1 SV=2
439,TRUE,Q8N4S9	MALD2_HUMAN,249.62852,13,17625.975,38827.273,3389.938,1988.9463,8873.311,657.7299,4216.462,6796.7466,3691.077,5345.4185,22580.2,30085.576,13,21,28,7,6,12,8,6,7,6,6,22,23,Oxidation (M),64168.113,MARVEL domain-containing protein 2 OS=Homo sapiens OX=9606 GN=MARVELD2 PE=1 SV=2
1395,TRUE,Q3MIR4	CC50B_HUMAN,87.77135,2,,,,,670.70807,,,690.3429,,,,,2,,,,,1,2,,2,,,,,,38941.195,Cell cycle control protein 50B OS=Homo sapiens OX=9606 GN=TMEM30B PE=1 SV=1
1320,TRUE,Q9ULV8	CBLC_HUMAN,87.11583,2,,,943.5331,749.4051,,,,,,628.32837,,,2,,,4,2,,,,,,1,,,,52455.99,E3 ubiquitin-protein ligase CBL-C OS=Homo sapiens OX=9606 GN=CBLC PE=1 SV=3
468,TRUE,P63096	GNAI1_HUMAN,287.63562,14,165.89902,497.95505,3446.763,4032.1475,6642.51,192.5478,1827.155,3944.7273,2383.503,3173.5886,,,7,15,13,36,29,27,19,25,35,25,21,8,11,Carbamidomethylation; Oxidation (M),40361.08,Guanine nucleotide-binding protein G(i) subunit alpha-1 OS=Homo sapiens OX=9606 GN=GNAI1 PE=1 SV=2
509,TRUE,P23528	COF1_HUMAN,302.97464,13,11879.3125,18370.914,121351.984,100132.69,78748.31,18978.66,63734.117,85178.38,153221.06,161210.66,18305.324,25116.008,13,17,18,39,30,31,17,31,37,38,34,14,14,Acetylation (N-term); Carbamidomethylation,18502.488,Cofilin-1 OS=Homo sapiens OX=9606 GN=CFL1 PE=1 SV=3
1043,TRUE,Q8TB37	NUBPL_HUMAN,195.81204,5,506.7713,481.0422,3309.055,1969.6716,4667.1504,,1374.0951,1979.3955,2124.415,1950.3834,437.05832,,5,3,5,6,5,7,3,5,7,3,4,1,2,,34082.785,Iron-sulfur protein NUBPL OS=Homo sapiens OX=9606 GN=NUBPL PE=1 SV=3
835,TRUE,P17813	EGLN_HUMAN,227.54152,7,1566.5939,2512.723,5696.8345,2629.357,5049.467,907.2774,3630.5303,8303.451,3841.2183,3469.4292,2891.345,3286.1963,7,3,7,5,4,4,6,3,6,7,5,7,5,Carbamidomethylation,70578.06,Endoglin OS=Homo sapiens OX=9606 GN=ENG PE=1 SV=2
392,TRUE,Q8N8S7	ENAH_HUMAN,254.8045,15,,,5902.7676,5915.297,1986.3718,,444.9498,2045.4739,10927.326,10049.609,,,15,1,,16,8,5,1,2,4,16,16,,,Oxidation (M); Acetylation (N-term); Carbamidomethylation,66510.26,Protein enabled homolog OS=Homo sapiens OX=9606 GN=ENAH PE=1 SV=2
1430,TRUE,Q8TCT8	SPP2A_HUMAN,88.04303,2,,,374.75256,398.075,318.44788,,,,,,,,2,,,5,3,2,,,,,,,,Carbamidomethylation,58143.152,Signal peptide peptidase-like 2A OS=Homo sapiens OX=9606 GN=SPPL2A PE=1 SV=2
1200,TRUE,Q9BZ67	FRMD8_HUMAN,137.60464,3,,274.69672,8314.626,,,,,997.2137,5345.961,5746.3735,,270.24957,3,1,2,4,4,1,1,1,1,2,2,,1,Carbamidomethylation,51218.03,FERM domain-containing protein 8 OS=Homo sapiens OX=9606 GN=FRMD8 PE=1 SV=1
293,TRUE,Q9H5V8	CDCP1_HUMAN,300.78967,18,35586.82,44469.695,27041.17,24422.658,63967.566,14984.503,56345.926,77090.08,37206.15,32986.047,59414.18,61745.188,18,30,32,19,18,35,24,36,35,21,25,33,27,Oxidation (M); Carbamidomethylation,92931.73,CUB domain-containing protein 1 OS=Homo sapiens OX=9606 GN=CDCP1 PE=1 SV=3
1305,TRUE,Q14512	FGFP1_HUMAN,113.21693,2,161.40451,832.1667,1169.3485,587.7506,3778.7798,279.35953,7166.009,11226.057,4847.8413,4820.307,1211.5542,2236.9937,2,1,1,3,1,2,2,4,3,4,3,2,4,,26264.32,Fibroblast growth factor-binding protein 1 OS=Homo sapiens OX=9606 GN=FGFBP1 PE=1 SV=1
100,TRUE,O00571	DDX3X_HUMAN,405.46027,34,63019.42,101298.67,190421.08,154170.7,60762.086,7503.298,60319.418,90206.2,231298.03,225528.53,73770.555,88881.39,34,46,53,71,70,46,31,44,49,87,79,54,51,Oxidation (M); Carbamidomethylation; Acetylation (N-term),73243.414,ATP-dependent RNA helicase DDX3X OS=Homo sapiens OX=9606 GN=DDX3X PE=1 SV=3
652,TRUE,P61224	RAP1B_HUMAN,245.13248,9,,,15713.284,9371.107,,,,,9030.1,9297.327,,,3,8,10,31,26,12,11,10,7,22,24,6,7,Carbamidomethylation; Oxidation (M),20824.783,Ras-related protein Rap-1b OS=Homo sapiens OX=9606 GN=RAP1B PE=1 SV=1
326,TRUE,P63244	RACK1_HUMAN,327.81583,17,43899,66134.49,124657.055,103594.86,65454.266,14972.81,44963.195,52042.516,138110.06,136365.11,41387.16,54101.062,17,20,26,33,34,24,14,23,26,37,34,26,23,Carbamidomethylation; Oxidation (M),35076.723,Receptor of activated protein C kinase 1 OS=Homo sapiens OX=9606 GN=RACK1 PE=1 SV=3
1209,TRUE,Q99584	S10AD_HUMAN,121.33412,3,,,3051.19,3220.6987,,,,,5266.764,5187.368,,,3,,,3,2,,,,,2,4,,,,11471.187,Protein S100-A13 OS=Homo sapiens OX=9606 GN=S100A13 PE=1 SV=1
121,TRUE,Q14C86	GAPD1_HUMAN,379.93643,34,4172.6855,15366.396,46348.473,39122.297,13866.908,1446.9304,8547.227,18701.004,65092.47,65310.195,10807.463,18413.729,34,11,24,48,51,22,19,26,33,44,45,18,31,Carbamidomethylation; Oxidation (M),164979.86,GTPase-activating protein and VPS9 domain-containing protein 1 OS=Homo sapiens OX=9606 GN=GAPVD1 PE=1 SV=2
376,TRUE,Q9Y5Y6	ST14_HUMAN,324.1251,17,73434.24,99924.87,76984.6,53028.72,77722.555,8017.312,44300.668,63808.86,77536.97,74631.65,49953.844,64026.93,17,35,36,37,36,27,18,22,24,32,30,29,26,Acetylation (N-term); Oxidation (M); Carbamidomethylation,94769.73,Suppressor of tumorigenicity 14 protein OS=Homo sapiens OX=9606 GN=ST14 PE=1 SV=2
817,TRUE,O94804	STK10_HUMAN,214.76303,7,,,366.2114,902.8644,392.43634,,149.50488,,12520.273,1549.7827,,,7,,1,8,5,4,2,3,3,6,4,,1,Carbamidomethylation,112135.234,Serine/threonine-protein kinase 10 OS=Homo sapiens OX=9606 GN=STK10 PE=1 SV=1
178,TRUE,Q8TDM6	DLG5_HUMAN,307.32767,29,4357.7456,14174.69,5612.281,2577.1106,5900.9897,,1802.544,9471.648,1947.5775,3284.253,3662.6758,6133.73,29,24,38,20,19,27,6,18,26,5,11,18,16,Oxidation (M),213867.6,Disks large homolog 5 OS=Homo sapiens OX=9606 GN=DLG5 PE=1 SV=4
1019,TRUE,P49768	PSN1_HUMAN,202.24236,5,,172.59962,1537.8623,473.93747,,,,,855.87665,,,,3,,2,7,9,,,,,5,3,1,2,,52667.836,Presenilin-1 OS=Homo sapiens OX=9606 GN=PSEN1 PE=1 SV=1
545,TRUE,Q99816	TS101_HUMAN,225.56082,10,1575.6595,5561.6753,5168.0493,2644.0447,1665.7695,,360.96655,1008.64923,4457.092,5429.9536,1347.9149,2802.2778,10,11,12,11,10,7,1,6,8,13,13,6,10,Oxidation (M),43944.316,Tumor susceptibility gene 101 protein OS=Homo sapiens OX=9606 GN=TSG101 PE=1 SV=2
916,TRUE,Q9UDY4	DNJB4_HUMAN,187.1989,6,,174.41953,8164.2393,5328.32,,,,,8756.25,9860.877,,152.49176,6,,1,7,4,,,,,3,7,,1,Carbamidomethylation,37806.816,DnaJ homolog subfamily B member 4 OS=Homo sapiens OX=9606 GN=DNAJB4 PE=1 SV=1
133,TRUE,Q9UJS0	CMC2_HUMAN,401.9802,32,28910.328,47776.188,256564.94,195660.4,37827.5,5078.3955,15481.561,22826.557,141960.27,165656.88,28171.71,32063.56,32,41,47,110,92,40,29,21,25,66,73,29,38,Carbamidomethylation; Oxidation (M),74175.58,Calcium-binding mitochondrial carrier protein Aralar2 OS=Homo sapiens OX=9606 GN=SLC25A13 PE=1 SV=2
855,TRUE,Q6IQ49	SDE2_HUMAN,154.06863,7,,903.9999,2196.6567,486.26212,,,,,1317.0707,1176.1648,132.96518,799.6354,7,2,4,7,6,1,,,1,3,4,3,5,Oxidation (M),49741.965,Replication stress response regulator SDE2 OS=Homo sapiens OX=9606 GN=SDE2 PE=1 SV=1
1063,TRUE,Q6UXD5	SE6L2_HUMAN,102.661804,3,145.89015,488.2305,196.53842,,195.62253,,,234.96727,,67.63816,,267.07196,3,1,2,1,,2,1,,3,,2,,2,Oxidation (M),97560.07,Seizure 6-like protein 2 OS=Homo sapiens OX=9606 GN=SEZ6L2 PE=1 SV=2
1289,TRUE,Q86WJ1	CHD1L_HUMAN,95.68063,2,,,,,,,,,,,,,2,,,,1,,,1,,1,1,1,1,,101000.01,Chromodomain-helicase-DNA-binding protein 1-like OS=Homo sapiens OX=9606 GN=CHD1L PE=1 SV=3
888,TRUE,P09497	CLCB_HUMAN,153.83249,6,510.64777,729.9668,17541.475,13596.159,2063.303,,485.72723,570.224,11792.395,14531.57,,632.08484,6,3,2,10,8,3,1,5,4,8,9,,5,Carbamidomethylation,25190.488,Clathrin light chain B OS=Homo sapiens OX=9606 GN=CLTB PE=1 SV=1
55,TRUE,P0DMV8	HS71A_HUMAN,457.66452,56,28339.055,55652.88,286955.3,214444.98,65453.797,11411.8125,57943.453,80605.38,438829.34,461357.6,40768.727,61607.785,24,63,63,133,127,67,50,64,72,163,160,66,65,Acetylation (N-term); Oxidation (M); Carbamidomethylation,70052.23,Heat shock 70 kDa protein 1A OS=Homo sapiens OX=9606 GN=HSPA1A PE=1 SV=1
1111,TRUE,P11233	RALA_HUMAN,161.34705,4,,1406.9927,7702.9395,4096.049,,,,,2235.8489,7202.3755,171.93329,,3,1,3,5,4,1,,,1,4,2,4,2,,23566.79,Ras-related protein Ral-A OS=Homo sapiens OX=9606 GN=RALA PE=1 SV=1
581,TRUE,O60645	EXOC3_HUMAN,251.212,11,835.76764,2633.2844,4352.417,3795.2212,1226.7769,,1585.3636,4477.081,5006.3105,4822.0747,843.157,1093.3657,11,8,10,9,12,9,5,7,9,7,6,6,4,,85567.42,Exocyst complex component 3 OS=Homo sapiens OX=9606 GN=EXOC3 PE=1 SV=3
1152,TRUE,P00813	ADA_HUMAN,118.87606,3,,,,,347.65536,,,,,,,,3,,,,,3,1,,,,1,,,,40764.445,Adenosine deaminase OS=Homo sapiens OX=9606 GN=ADA PE=1 SV=3
445,TRUE,P51148	RAB5C_HUMAN,259.3831,10,12766.156,31799.758,116791.73,104502.08,24519.95,2565.885,8975.461,16635.746,59576.766,97835.125,10253.697,13652.389,7,23,22,41,38,26,22,19,27,39,36,20,16,Oxidation (M),23482.553,Ras-related protein Rab-5C OS=Homo sapiens OX=9606 GN=RAB5C PE=1 SV=2
557,TRUE,P01111	RASN_HUMAN,215.6098,11,1007.6069,1833.6853,3118.2805,2204.0623,1431.6167,237.43341,969.5739,1485.7286,3577.3345,3012.065,937.347,1232.8784,3,8,15,17,10,11,8,11,9,13,11,6,5,Oxidation (M); Carbamidomethylation,21229.162,GTPase NRas OS=Homo sapiens OX=9606 GN=NRAS PE=1 SV=1
1304,TRUE,O95197	RTN3_HUMAN,125.217926,2,5482.9272,10758.949,29105.625,21261.71,1596.2914,,509.0611,1075.624,19818.525,19358.133,4910.5767,5812.5557,2,3,4,3,3,1,1,1,2,2,2,3,3,,112611.05,Reticulon-3 OS=Homo sapiens OX=9606 GN=RTN3 PE=1 SV=2
97,TRUE,P26006	ITA3_HUMAN,421.47995,34,208973.77,407325,224328.53,171412.83,390938.03,74750.836,382195.1,637782,532580.25,509857.3,493497.94,614876.25,34,80,102,85,76,95,69,126,140,91,93,120,124,Carbamidomethylation; Oxidation (M),116612.234,Integrin alpha-3 OS=Homo sapiens OX=9606 GN=ITGA3 PE=1 SV=5
507,TRUE,P27448	MARK3_HUMAN,258.29855,12,,,1012.7014,82.25862,528.0015,,144.3779,817.7086,603.9702,1151.5364,,,7,5,9,11,11,11,10,8,10,14,13,5,7,Oxidation (M); Carbamidomethylation,84428.5,MAP/microtubule affinity-regulating kinase 3 OS=Homo sapiens OX=9606 GN=MARK3 PE=1 SV=5
1207,TRUE,O43150	ASAP2_HUMAN,132.7018,3,,,303.79178,,,,,386.59637,1371.9796,1823.7054,,,3,,,2,,,,3,2,3,3,,,,111650.57,"Arf-GAP with SH3 domain, ANK repeat and PH domain-containing protein 2 OS=Homo sapiens OX=9606 GN=ASAP2 PE=1 SV=3"
1065,TRUE,P49810	PSN2_HUMAN,129.02068,4,,,,,,,,,,,,,2,,1,3,2,,,,,1,1,,1,,50140.383,Presenilin-2 OS=Homo sapiens OX=9606 GN=PSEN2 PE=1 SV=1
790,TRUE,Q15165	PON2_HUMAN,267.3897,8,285.9104,1544.8086,27369.701,24641.293,5161.475,874.0112,2257.252,4113.2485,14050.545,25259.09,462.35068,194.61707,8,11,4,17,18,9,8,6,5,15,16,2,7,,39380.918,Serum paraoxonase/arylesterase 2 OS=Homo sapiens OX=9606 GN=PON2 PE=1 SV=4
42,TRUE,P35908	K22E_HUMAN,475.2214,67,135727.2,226358.6,158665.27,129972.19,290250.28,74030.67,493679,732404.8,192925.16,191380.73,258038.98,326551.88,47,84,122,97,86,116,78,154,211,104,103,129,141,Oxidation (M); Carbamidomethylation,65432.883,"Keratin, type II cytoskeletal 2 epidermal OS=Homo sapiens OX=9606 GN=KRT2 PE=1 SV=2"
467,TRUE,P07947	YES_HUMAN,270.92792,11,1471.1696,1623.5151,3107.6362,918.85126,6840.8086,464.2785,5477.8,8268.766,3852.1006,2747.6506,2758.028,2259.3125,8,10,8,11,10,18,8,16,18,13,16,14,13,Carbamidomethylation; Oxidation (M),60801.23,Tyrosine-protein kinase Yes OS=Homo sapiens OX=9606 GN=YES1 PE=1 SV=3
478,TRUE,Q9UH65	SWP70_HUMAN,239.18979,14,,,5169.997,4058.6318,1755.7378,,595.80975,865.4815,2829.3667,2198.438,,,14,,,14,11,6,2,6,6,9,10,,,Carbamidomethylation,68997.625,Switch-associated protein 70 OS=Homo sapiens OX=9606 GN=SWAP70 PE=1 SV=1
1434,TRUE,Q9H9K5	MER34_HUMAN,108.431885,2,1713.243,1784.3026,694.48865,,,,,1554.6646,1685.9918,,1869.2117,1131.1818,2,2,2,3,1,1,2,1,2,1,,2,1,,63546.96,Endogenous retroviral envelope protein HEMO OS=Homo sapiens OX=9606 GN=ERVMER34-1 PE=1 SV=1
36,FALSE,P50993	AT1A2_HUMAN,374.32278,21,48445.617,77517.12,168920.17,115295.09,226194.78,55408.84,186594.34,245850.73,256536.94,249520.08,78112.805,105058.55,8,54,68,78,75,92,65,82,105,98,98,64,73,Carbamidomethylation; Oxidation (M),112265.44,Sodium/potassium-transporting ATPase subunit alpha-2 OS=Homo sapiens OX=9606 GN=ATP1A2 PE=1 SV=1
307,TRUE,Q9NV70	EXOC1_HUMAN,259.86014,16,,2556.905,5470.493,3192.9724,2933.084,,1363.3611,5541.875,7402.14,6010.4214,573.3764,1981.9102,16,4,12,17,13,12,7,6,16,15,14,2,8,Oxidation (M); Carbamidomethylation,101981.53,Exocyst complex component 1 OS=Homo sapiens OX=9606 GN=EXOC1 PE=1 SV=4
1323,TRUE,P21802	FGFR2_HUMAN,66.09794,2,,640.4241,,,,,,,,,,,2,1,3,,,2,,,,,,,,Oxidation (M),92025.01,Fibroblast growth factor receptor 2 OS=Homo sapiens OX=9606 GN=FGFR2 PE=1 SV=1
1166,TRUE,O75387	LAT3_HUMAN,96.52055,3,,,,,,,,182.17873,,,,,3,,,,,,,2,2,,,,,Oxidation (M),61476.87,Large neutral amino acids transporter small subunit 3 OS=Homo sapiens OX=9606 GN=SLC43A1 PE=1 SV=1
1098,TRUE,P06703	S10A6_HUMAN,147.88348,2,24402.824,51468.96,79929.5,50442.695,18942.977,3840.8774,3305.0679,12528.941,58297.46,63134.906,22607.713,33338.89,2,7,13,13,12,5,6,4,7,13,11,7,7,Acetylation (N-term); Carbamidomethylation; Oxidation (M),10179.734,Protein S100-A6 OS=Homo sapiens OX=9606 GN=S100A6 PE=1 SV=1
1044,TRUE,O15498	YKT6_HUMAN,160.38182,5,,,1100.3334,999.41064,,,,,1616.395,1997.644,,133.42917,5,1,,3,5,1,,,1,3,7,,1,,22417.576,Synaptobrevin homolog YKT6 OS=Homo sapiens OX=9606 GN=YKT6 PE=1 SV=1
870,TRUE,P10114	RAP2A_HUMAN,162.55936,6,,60.99658,,,,,,,,,,,2,4,5,7,3,3,2,2,2,2,2,2,2,Carbamidomethylation; Oxidation (M),20615.451,Ras-related protein Rap-2a OS=Homo sapiens OX=9606 GN=RAP2A PE=1 SV=1
1154,TRUE,Q9Y6G3	RM42_HUMAN,102.27009,2,,,166.1343,99.008545,332.3241,,,968.0227,1980.197,1773.335,,,2,,2,3,2,6,1,1,5,5,7,,,Carbamidomethylation; Oxidation (M),16661.113,"39S ribosomal protein L42, mitochondrial OS=Homo sapiens OX=9606 GN=MRPL42 PE=1 SV=1"
275,TRUE,Q99569	PKP4_HUMAN,306.44223,21,557.5542,2388.311,1699.7909,1404.907,599.8579,,428.42822,968.8866,8491.258,8926.166,668.5105,1249.7715,21,8,5,11,6,7,1,1,6,19,25,4,8,Carbamidomethylation; Oxidation (M),131868.3,Plakophilin-4 OS=Homo sapiens OX=9606 GN=PKP4 PE=1 SV=2
1159,TRUE,Q9UNK0	STX8_HUMAN,156.56662,3,,,2149.4805,2222.671,,,,,2373.0562,3183.3645,,,3,,,6,5,1,,,,1,3,,,,26906.693,Syntaxin-8 OS=Homo sapiens OX=9606 GN=STX8 PE=1 SV=2
452,TRUE,Q9H7D0	DOCK5_HUMAN,224.54204,13,,282.30774,2403.7397,1836.9263,338.2088,,474.35254,1326.404,2726.1348,3764.0532,,245.18695,13,,3,5,5,1,,3,8,12,13,1,5,Carbamidomethylation; Oxidation (M),215308.73,Dedicator of cytokinesis protein 5 OS=Homo sapiens OX=9606 GN=DOCK5 PE=1 SV=3
506,TRUE,Q92896	GSLG1_HUMAN,230.7064,9,488.2354,4489.2227,5715.615,901.8534,18288.39,1314.4443,5865.094,10181.432,4889.0327,4411.11,217.0523,263.1135,9,2,4,11,9,25,10,15,18,10,10,2,1,Carbamidomethylation; Oxidation (M),134551.84,Golgi apparatus protein 1 OS=Homo sapiens OX=9606 GN=GLG1 PE=1 SV=2
1128,TRUE,Q8NBP7	PCSK9_HUMAN,127.07559,4,,,,,1424.1416,,,,358.8009,699.819,,,4,,,,,2,,,,4,2,,,Oxidation (M),74286.21,Proprotein convertase subtilisin/kexin type 9 OS=Homo sapiens OX=9606 GN=PCSK9 PE=1 SV=3
516,TRUE,Q9NZW5	MPP6_HUMAN,245.89148,13,177.2045,587.29083,1325.01,1218.6776,7717.0513,,3801.71,4072.0588,6446.612,5778.9336,774.7092,668.75214,13,3,3,2,6,11,3,7,12,11,12,4,4,,61117.004,MAGUK p55 subfamily member 6 OS=Homo sapiens OX=9606 GN=MPP6 PE=1 SV=2
221,TRUE,Q9NXE4	NSMA3_HUMAN,318.71268,23,1171.8771,3897.2725,34931.633,29630.076,265.6129,,,231.8132,28608.8,35274.336,2917.8547,6301.362,23,10,14,34,33,3,1,,3,31,35,9,14,Acetylation (N-term); Carbamidomethylation; Oxidation (M),97809.92,Sphingomyelin phosphodiesterase 4 OS=Homo sapiens OX=9606 GN=SMPD4 PE=1 SV=3
1283,TRUE,Q10589	BST2_HUMAN,147.07767,3,23136.795,43386.38,28166.512,21865.416,39615.63,9613.08,5848.9097,11742.699,6221.5254,12177.912,8919.108,11981.035,3,9,11,9,6,8,7,6,5,4,6,6,5,,19768.91,Bone marrow stromal antigen 2 OS=Homo sapiens OX=9606 GN=BST2 PE=1 SV=1
191,TRUE,Q9BQ39	DDX50_HUMAN,333.4903,26,6546.622,13712.53,144735.98,128188.61,11596.326,1475.0449,9068.244,15016.079,167890.42,149001.28,9786.459,10013.298,26,8,12,49,47,13,3,9,10,34,39,14,11,Acetylation (N-term); Oxidation (M); Carbamidomethylation,82565.016,ATP-dependent RNA helicase DDX50 OS=Homo sapiens OX=9606 GN=DDX50 PE=1 SV=1
146,TRUE,Q07157	ZO1_HUMAN,373.66364,32,3531.2207,12090.407,22338.066,13302.214,5626.7715,,3645.755,11691.831,44827.105,37664.87,6653.3867,12119.985,32,26,28,29,37,21,5,26,30,48,44,28,24,Oxidation (M),195459.03,Tight junction protein ZO-1 OS=Homo sapiens OX=9606 GN=TJP1 PE=1 SV=3
563,TRUE,O15530	PDPK1_HUMAN,238.69826,12,3292.16,7089.754,199.45245,,288.6996,,105.091034,242.11032,,,314.22064,125.07013,12,12,15,4,2,3,,1,2,1,1,4,3,Oxidation (M),63151.848,3-phosphoinositide-dependent protein kinase 1 OS=Homo sapiens OX=9606 GN=PDPK1 PE=1 SV=1
276,TRUE,Q9P273	TEN3_HUMAN,279.49872,21,295.43365,881.90607,,,380.51544,,2594.8313,9718.373,8232.713,8867.746,7788.2944,10521.464,20,8,8,1,1,3,,19,25,15,16,24,25,Oxidation (M); Carbamidomethylation,300950.47,Teneurin-3 OS=Homo sapiens OX=9606 GN=TENM3 PE=1 SV=3
961,TRUE,Q96JI7	SPTCS_HUMAN,127.25317,6,,,102.037704,,,,,,,225.22624,,,6,,1,4,1,,,,,3,3,,,,278868.12,Spatacsin OS=Homo sapiens OX=9606 GN=SPG11 PE=1 SV=3
874,FALSE,Q6ZT62	BGIN_HUMAN,134.23431,5,,,1192.9741,,134.10606,,,437.14148,1040.2356,1061.9526,,,5,,,4,1,1,,,1,4,2,,,Oxidation (M); Carbamidomethylation,73599.47,Bargin OS=Homo sapiens OX=9606 GN=BARGIN PE=1 SV=2
434,TRUE,Q05682	CALD1_HUMAN,227.6213,15,,,,,,,,398.8564,4299.8486,5940.8105,,,15,,,1,2,,,2,2,10,18,1,,Oxidation (M),93231.08,Caldesmon OS=Homo sapiens OX=9606 GN=CALD1 PE=1 SV=3
548,TRUE,Q16625	OCLN_HUMAN,260.18677,11,23716.662,55099.42,16406.062,10591.118,4031.231,,2114.1733,4377.8213,24266.357,23151.094,20946.25,24482.21,11,33,40,20,13,10,2,9,6,10,9,22,29,Oxidation (M),59143.785,Occludin OS=Homo sapiens OX=9606 GN=OCLN PE=1 SV=1
499,TRUE,P19174	PLCG1_HUMAN,264.7053,13,,,2220.1548,1517.1315,1612.6509,,128.3865,740.8733,4235.7725,1713.0104,430.8143,,13,,,14,11,4,,3,8,12,12,1,2,Carbamidomethylation,148532.08,"1-phosphatidylinositol 4,5-bisphosphate phosphodiesterase gamma-1 OS=Homo sapiens OX=9606 GN=PLCG1 PE=1 SV=1"
626,TRUE,P23469	PTPRE_HUMAN,207.7107,9,690.45447,1053.3667,2589.934,1980.2671,3945.3657,,2026.486,5561.288,2071.734,3467.4434,278.93265,258.78897,9,3,4,6,6,6,3,5,7,7,5,4,2,Oxidation (M),80641.69,Receptor-type tyrosine-protein phosphatase epsilon OS=Homo sapiens OX=9606 GN=PTPRE PE=1 SV=1
236,TRUE,O60488	ACSL4_HUMAN,298.0105,19,159.38446,1112.0405,15715.678,12591.212,2127.8486,,1609.4012,3634.6353,10371.869,10148.59,452.78195,1152.209,16,7,8,41,33,26,9,11,14,19,24,8,9,Oxidation (M); Carbamidomethylation,79188.04,Long-chain-fatty-acid--CoA ligase 4 OS=Homo sapiens OX=9606 GN=ACSL4 PE=1 SV=2
526,TRUE,O95716	RAB3D_HUMAN,290.2349,10,7096.3447,17347.078,48617.406,35130.332,9799.847,1340.9783,3123.8525,5409.266,27899,26516.475,5137.0845,7003.3345,7,23,29,36,37,19,22,12,12,28,31,18,19,Carbamidomethylation; Oxidation (M),24267.14,Ras-related protein Rab-3D OS=Homo sapiens OX=9606 GN=RAB3D PE=1 SV=1
996,TRUE,P78324	SHPS1_HUMAN,171.2332,5,,,900.9837,729.4301,3599.8853,,2530.0024,5150.519,4227.2236,2943.036,,,5,,,2,3,5,3,6,11,5,8,,,,54966.85,Tyrosine-protein phosphatase non-receptor type substrate 1 OS=Homo sapiens OX=9606 GN=SIRPA PE=1 SV=2
339,TRUE,Q07864	DPOE1_HUMAN,255.36201,18,1653.8826,3518.7703,5837.771,3270.1987,,,,1969.3844,5904.6396,5774.744,,3485.1792,18,15,15,20,13,,,,1,8,6,,2,Oxidation (M); Acetylation (N-term),261517.89,DNA polymerase epsilon catalytic subunit A OS=Homo sapiens OX=9606 GN=POLE PE=1 SV=5
60,TRUE,Q9UMD9	COHA1_HUMAN,421.2736,45,317002.3,516917.28,429562.62,341496.88,494908.72,110406.87,433644.25,702489.3,712935.9,724664.7,364277.8,474846.4,45,88,106,94,92,101,64,93,116,141,129,104,96,Carbamidomethylation; Oxidation (M),150419.39,Collagen alpha-1(XVII) chain OS=Homo sapiens OX=9606 GN=COL17A1 PE=1 SV=3
429,TRUE,Q5VZK9	CARL1_HUMAN,252.67784,14,,120.48619,3490.066,1760.9697,543.0921,,528.0746,448.2679,2325.9854,2184.4954,113.01043,,14,2,2,12,9,5,1,4,4,11,11,1,2,Oxidation (M),151556.8,F-actin-uncapping protein LRRC16A OS=Homo sapiens OX=9606 GN=CARMIL1 PE=1 SV=1
28,TRUE,P11021	BIP_HUMAN,528.1807,80,233527.6,419019.47,3527106.5,2835290.2,2259578,584844.94,1829913.5,2809282.5,4477132.5,4532022.5,292511.25,324026.78,74,124,127,306,295,275,192,248,344,408,417,113,116,Oxidation (M); Carbamidomethylation; Acetylation (N-term),72332.95,Endoplasmic reticulum chaperone BiP OS=Homo sapiens OX=9606 GN=HSPA5 PE=1 SV=2
1186,TRUE,P16333	NCK1_HUMAN,125.11142,3,,,1203.0918,444.04102,,,,,436.93866,1660.2766,,,3,,,2,1,,,,,3,6,,,,42864.46,Cytoplasmic protein NCK1 OS=Homo sapiens OX=9606 GN=NCK1 PE=1 SV=1
427,FALSE,O95837	GNA14_HUMAN,140.06407,4,,,,,,,,,290.64615,922.53406,,,2,1,2,7,2,4,2,1,1,6,5,1,1,,41570.64,Guanine nucleotide-binding protein subunit alpha-14 OS=Homo sapiens OX=9606 GN=GNA14 PE=1 SV=1
1077,TRUE,Q9HBI1	PARVB_HUMAN,158.85553,4,,,,,,,,774.66327,1347.2646,565.40314,,,2,,1,4,1,,,6,5,4,3,2,,,41714.25,Beta-parvin OS=Homo sapiens OX=9606 GN=PARVB PE=1 SV=1
1427,TRUE,Q96GX5	GWL_HUMAN,98.221504,2,,,,,,,,,,,,,2,,,1,1,,,,,,,1,1,,97319.01,Serine/threonine-protein kinase greatwall OS=Homo sapiens OX=9606 GN=MASTL PE=1 SV=1
950,TRUE,P11274	BCR_HUMAN,158.54651,6,137.34224,359.38434,,150.9961,307.6175,,347.31372,1098.9988,926.0686,832.0363,404.6302,1094.1946,5,4,2,1,3,3,,2,5,5,4,3,6,Oxidation (M),142819.34,Breakpoint cluster region protein OS=Homo sapiens OX=9606 GN=BCR PE=1 SV=2
992,TRUE,Q9Y4F1	FARP1_HUMAN,171.20891,5,,672.3496,2489.5527,1440.827,3433.358,,,,,,,,5,3,4,4,6,9,3,,,,,,,,118632.93,"FERM, ARHGEF and pleckstrin domain-containing protein 1 OS=Homo sapiens OX=9606 GN=FARP1 PE=1 SV=1"
1414,TRUE,P14384	CBPM_HUMAN,98.71291,2,315.72888,1123.595,,,808.2799,,,,,,,,2,1,2,1,,3,,,,,,,,,50513.848,Carboxypeptidase M OS=Homo sapiens OX=9606 GN=CPM PE=1 SV=2
875,TRUE,P30043	BLVRB_HUMAN,194.70839,6,,210.55087,6939.231,4517.402,278.75092,,,370.24353,3221.6074,2233.3276,,102.90851,6,,1,13,10,2,2,,1,7,6,,2,Carbamidomethylation; Oxidation (M),22119.344,Flavin reductase (NADPH) OS=Homo sapiens OX=9606 GN=BLVRB PE=1 SV=3
58,TRUE,P18206	VINC_HUMAN,388.00674,43,,1444.1068,90697.75,60800.29,18523.043,448.5902,7762.8604,19438.95,101780.24,127616.28,548.7125,412.30975,43,4,11,83,76,42,21,39,38,89,81,6,3,Oxidation (M); Carbamidomethylation,123799.3,Vinculin OS=Homo sapiens OX=9606 GN=VCL PE=1 SV=4
35,TRUE,P04264	K2C1_HUMAN,483.15634,69,578027.44,872461.56,891941.25,735814.2,947737.4,285398.03,1491541.8,1964735.6,727077.3,707692.56,858781.75,1057332.6,55,144,173,173,149,161,115,245,291,148,149,170,180,Oxidation (M); Acetylation (N-term); Carbamidomethylation,66038.73,"Keratin, type II cytoskeletal 1 OS=Homo sapiens OX=9606 GN=KRT1 PE=1 SV=6"
296,TRUE,Q8IZT6	ASPM_HUMAN,273.512,20,4194.438,8736.774,17451.135,5506.8916,4568.277,,4759.898,7497.5405,29866.32,29362.762,6125.4463,6861.967,20,1,4,24,14,2,,1,2,13,15,1,4,Oxidation (M); Acetylation (N-term),409800.06,Abnormal spindle-like microcephaly-associated protein OS=Homo sapiens OX=9606 GN=ASPM PE=1 SV=2
734,TRUE,Q9Y5X3	SNX5_HUMAN,186.88516,9,,,7014.679,2537.2114,954.79297,,294.29547,2399.1533,9779.144,13065.904,209.63266,847.65515,9,,1,13,5,4,,3,6,9,13,3,3,Acetylation (N-term); Carbamidomethylation,46816.49,Sorting nexin-5 OS=Homo sapiens OX=9606 GN=SNX5 PE=1 SV=1
377,TRUE,P52735	VAV2_HUMAN,284.14633,14,749.21027,1590.1578,11061.04,6352.6597,6697.6343,255.69017,3543.1025,9984.128,19391.71,20082.014,4635.799,2640.1758,14,5,6,20,13,10,5,10,13,19,20,6,11,Oxidation (M),101288.99,Guanine nucleotide exchange factor VAV2 OS=Homo sapiens OX=9606 GN=VAV2 PE=1 SV=2
237,TRUE,O15294	OGT1_HUMAN,294.50034,22,1197.2667,4191.158,10053.062,5646.49,,,,614.27783,13248.729,11781.736,2602.1035,2594.9087,22,15,15,22,16,3,,4,8,23,18,15,14,Acetylation (N-term); Carbamidomethylation; Oxidation (M),116924.6,UDP-N-acetylglucosamine--peptide N-acetylglucosaminyltransferase 110 kDa subunit OS=Homo sapiens OX=9606 GN=OGT PE=1 SV=3
314,TRUE,P62136	PP1A_HUMAN,339.07498,18,691.65137,,5383.995,8209.336,2817.6997,,946.0519,,2485.9153,3717.9124,204.00139,,3,11,13,38,36,21,16,17,15,29,29,6,5,Carbamidomethylation; Oxidation (M),37512.074,Serine/threonine-protein phosphatase PP1-alpha catalytic subunit OS=Homo sapiens OX=9606 GN=PPP1CA PE=1 SV=1
1229,TRUE,O75935	DCTN3_HUMAN,157.3063,3,,,3497.0864,3554.4326,2117.7476,,753.0521,2353.0117,1935.7493,1131.8085,,,3,,,3,6,2,1,1,3,3,2,,,Carbamidomethylation,21119.414,Dynactin subunit 3 OS=Homo sapiens OX=9606 GN=DCTN3 PE=1 SV=1
1262,TRUE,Q9NRZ7	PLCC_HUMAN,110.906654,3,,,4496.771,3793.2593,,,,,,,,,3,1,,4,3,1,,,,,,,,,43380.965,1-acyl-sn-glycerol-3-phosphate acyltransferase gamma OS=Homo sapiens OX=9606 GN=AGPAT3 PE=1 SV=1
228,TRUE,O75955	FLOT1_HUMAN,332.91473,18,296.51648,604.87476,31802.732,15504.547,5025.35,,897.7248,1459.6862,42590.87,43669.473,243.97728,1167.312,18,7,7,28,32,22,11,9,8,27,29,10,10,Oxidation (M); Carbamidomethylation,47355.28,Flotillin-1 OS=Homo sapiens OX=9606 GN=FLOT1 PE=1 SV=3
788,TRUE,P54278	PMS2_HUMAN,189.3216,8,,,,,,,,,1091.75,2530.3215,193.45227,,8,,,2,2,,,,,7,8,1,3,Carbamidomethylation,95796.6,Mismatch repair endonuclease PMS2 OS=Homo sapiens OX=9606 GN=PMS2 PE=1 SV=2
1282,TRUE,Q96B97	SH3K1_HUMAN,123.528114,3,,,1417.8561,,,,,919.6709,1704.9656,2217.33,,,3,,,1,2,,,,1,5,3,,,,73126.305,SH3 domain-containing kinase-binding protein 1 OS=Homo sapiens OX=9606 GN=SH3KBP1 PE=1 SV=2
981,TRUE,O00400	ACATN_HUMAN,162.85237,4,,,5386.5728,5285.451,587.25555,,290.66098,,3131.6042,594.67914,333.84653,748.2964,4,2,1,6,8,2,1,2,1,5,6,1,3,Oxidation (M),60908.992,Acetyl-coenzyme A transporter 1 OS=Homo sapiens OX=9606 GN=SLC33A1 PE=1 SV=1
9,TRUE,Q01082	SPTB2_HUMAN,543.58777,124,23839.51,36253.133,223045.98,163248.52,55258.914,1876.7354,57881.902,120123.875,412431.66,441019.38,27127,42199.32,114,73,87,210,192,87,46,104,164,264,301,70,90,Carbamidomethylation; Oxidation (M),274609.22,"Spectrin beta chain, non-erythrocytic 1 OS=Homo sapiens OX=9606 GN=SPTBN1 PE=1 SV=2"
259,TRUE,Q96CW1	AP2M1_HUMAN,302.33115,15,2788.0903,5641.58,78242.984,50495.05,25014.432,1336.3716,14565.935,28142.863,43236.81,39134.52,718.45844,2661.8672,15,7,10,41,40,14,10,18,21,28,32,4,5,Carbamidomethylation; Oxidation (M),49654.676,AP-2 complex subunit mu OS=Homo sapiens OX=9606 GN=AP2M1 PE=1 SV=2
970,FALSE,Q12974	TP4A2_HUMAN,101.89778,2,,,904.7127,455.84518,,,,,212.70782,270.54462,,,2,,,4,4,,,,,2,2,,,,19127.191,Protein tyrosine phosphatase type IVA 2 OS=Homo sapiens OX=9606 GN=PTP4A2 PE=1 SV=1
354,TRUE,P50281	MMP14_HUMAN,293.3666,14,14191.055,25977.537,14464.581,8440.967,25637.666,1938.8679,34957.754,55251.79,38965.086,44200.543,28561.963,40321.195,14,19,21,16,17,29,16,27,36,26,28,28,23,Oxidation (M); Carbamidomethylation,65893.92,Matrix metalloproteinase-14 OS=Homo sapiens OX=9606 GN=MMP14 PE=1 SV=3
487,TRUE,Q04721	NOTC2_HUMAN,236.11256,11,2086.2717,5408.7515,1247.238,3418.3716,2704.0103,,629.75635,1549.0013,3550.0334,5554.83,1212.6903,2269.189,9,8,13,6,10,4,2,2,5,5,4,2,3,Oxidation (M),265404.78,Neurogenic locus notch homolog protein 2 OS=Homo sapiens OX=9606 GN=NOTCH2 PE=1 SV=3
442,TRUE,Q96EY1	DNJA3_HUMAN,291.65765,13,879.0671,3450.3103,20310.38,12334.376,27269.492,1514.1816,9064.132,18245.744,28752.732,27650.514,1648.7408,2095.681,13,3,12,19,23,20,13,15,17,25,17,5,10,Oxidation (M); Carbamidomethylation,52488.68,"DnaJ homolog subfamily A member 3, mitochondrial OS=Homo sapiens OX=9606 GN=DNAJA3 PE=1 SV=2"
993,TRUE,Q15811	ITSN1_HUMAN,148.5041,5,,,,,,,,,1030.4379,1419.9363,,,5,,,,2,,,,,2,5,,,,195421.69,Intersectin-1 OS=Homo sapiens OX=9606 GN=ITSN1 PE=1 SV=3
851,TRUE,Q8IZA0	K319L_HUMAN,157.12083,7,,,,168.54453,1676.6407,,590.33936,1050.8107,707.6991,869.08844,,,7,,,,2,5,2,4,5,2,2,,,,115657.74,Dyslexia-associated protein KIAA0319-like protein OS=Homo sapiens OX=9606 GN=KIAA0319L PE=1 SV=2
483,TRUE,P48730	KC1D_HUMAN,223.06335,12,1769.4669,4764.3174,17576.887,12134.456,2218.5464,,586.21204,2587.0667,8879.561,7732.6646,1461.3763,1467.3843,12,5,8,15,14,8,2,3,5,11,8,3,5,Carbamidomethylation; Oxidation (M),47330.074,Casein kinase I isoform delta OS=Homo sapiens OX=9606 GN=CSNK1D PE=1 SV=2
123,TRUE,Q13332	PTPRS_HUMAN,386.23352,34,1545.5865,5083.382,2508.7207,2701.7822,2691.546,,1214.3506,2300.0698,4462.1514,6474.9346,1760.4844,2084.2173,19,37,40,39,36,35,12,39,28,38,38,24,28,Acetylation (N-term); Carbamidomethylation; Oxidation (M),217041.36,Receptor-type tyrosine-protein phosphatase S OS=Homo sapiens OX=9606 GN=PTPRS PE=1 SV=3
1223,TRUE,O94886	CSCL1_HUMAN,123.69237,3,,488.6786,2658.8054,1693.6962,1648.5774,,189.27936,574.67035,1643.0431,1543.4326,,345.4677,3,1,2,3,3,2,1,1,2,1,1,,1,,92126.24,CSC1-like protein 1 OS=Homo sapiens OX=9606 GN=TMEM63A PE=1 SV=3
810,TRUE,O60941	DTNB_HUMAN,212.93811,8,320.33618,1152.8113,1414.6378,1892.8542,4157.913,,1191.5062,7230.0156,2528.2947,2086.3108,1442.3479,3274.305,8,3,2,2,5,6,3,3,8,2,1,3,3,Oxidation (M),71355.56,Dystrobrevin beta OS=Homo sapiens OX=9606 GN=DTNB PE=1 SV=1
1120,TRUE,Q96NW4	ANR27_HUMAN,133.42386,4,85.49055,264.04498,,,,,,,474.68796,535.3802,,,4,1,4,2,4,,,,,6,4,3,1,,116984.04,Ankyrin repeat domain-containing protein 27 OS=Homo sapiens OX=9606 GN=ANKRD27 PE=1 SV=2
1032,TRUE,Q9H201	EPN3_HUMAN,164.9476,5,,,,116.28558,,,,,,,,,2,5,5,6,5,5,5,4,3,5,5,3,5,,68222.23,Epsin-3 OS=Homo sapiens OX=9606 GN=EPN3 PE=2 SV=1
930,TRUE,P51636	CAV2_HUMAN,180.54091,5,6089.722,10102.31,24096.467,19796.498,4781.5005,1041.5153,3151.5122,4460.2715,17178.93,23804.166,7395.5713,8827.295,5,2,3,5,4,2,1,1,1,6,8,2,5,Oxidation (M); Carbamidomethylation,18291.182,Caveolin-2 OS=Homo sapiens OX=9606 GN=CAV2 PE=1 SV=2
793,TRUE,P25054	APC_HUMAN,186.64917,8,,,,,,,,394.96454,881.60815,811.4114,246.3799,167.20926,8,,3,2,3,1,,2,2,2,8,2,4,Carbamidomethylation; Oxidation (M),311645.9,Adenomatous polyposis coli protein OS=Homo sapiens OX=9606 GN=APC PE=1 SV=2
44,TRUE,P12814	ACTN1_HUMAN,478.7379,57,39801.664,70492.93,707504.4,545146.1,302397.75,73432.125,249373.47,414196.2,872491.2,834261,57764.402,68809.27,45,58,66,209,182,142,85,144,143,217,220,72,68,Carbamidomethylation; Oxidation (M); Acetylation (N-term),103057.55,Alpha-actinin-1 OS=Homo sapiens OX=9606 GN=ACTN1 PE=1 SV=2
955,TRUE,Q9P0L2	MARK1_HUMAN,156.5436,6,,,,,,,,,,,,,2,2,5,4,4,7,6,3,3,5,4,3,5,Carbamidomethylation; Oxidation (M),89002.61,Serine/threonine-protein kinase MARK1 OS=Homo sapiens OX=9606 GN=MARK1 PE=1 SV=2
1240,TRUE,Q92633	LPAR1_HUMAN,134.84776,3,,,,,1346.7925,,2583.8833,3537.6897,805.19604,681.14923,,,3,,,,,4,3,4,6,2,2,,,,41109.367,Lysophosphatidic acid receptor 1 OS=Homo sapiens OX=9606 GN=LPAR1 PE=1 SV=3
286,TRUE,Q13492	PICAL_HUMAN,328.12167,18,3248.2883,17517.91,31844.133,26889.734,3667.8018,,2041.1709,5441.3037,26026.748,24685.77,4809.889,6056.824,18,10,15,24,26,13,4,5,9,21,21,12,14,Oxidation (M),70754.51,Phosphatidylinositol-binding clathrin assembly protein OS=Homo sapiens OX=9606 GN=PICALM PE=1 SV=2
1156,TRUE,Q9Y2J4	AMOL2_HUMAN,134.9448,3,,,92.01121,,,,,,169.48264,95.04462,,82.384285,3,1,2,1,2,1,,1,2,1,2,,2,,85764.41,Angiomotin-like protein 2 OS=Homo sapiens OX=9606 GN=AMOTL2 PE=1 SV=3
188,TRUE,P30153	2AAA_HUMAN,368.04376,24,6411.877,13521.594,106730.414,60645.87,60201.664,5702.8145,37965.383,65262.613,92274.445,119273.56,15323.323,19277.139,24,25,24,53,61,43,23,35,40,54,54,23,28,Acetylation (N-term); Carbamidomethylation; Oxidation (M),65308.582,Serine/threonine-protein phosphatase 2A 65 kDa regulatory subunit A alpha isoform OS=Homo sapiens OX=9606 GN=PPP2R1A PE=1 SV=4
529,TRUE,P61204	ARF3_HUMAN,263.4842,8,44775.797,90973.914,133141.53,98951.55,51791.77,8760.718,33722.547,60741.24,118827.414,124132.586,44405.88,40941.9,4,37,43,50,48,34,21,28,36,37,33,32,30,Oxidation (M),20600.76,ADP-ribosylation factor 3 OS=Homo sapiens OX=9606 GN=ARF3 PE=1 SV=2
819,TRUE,O95810	CAVN2_HUMAN,209.83344,6,,1981.2075,7994.703,4634.8716,,,394.07562,1757.0453,16321.862,16185.792,627.6835,1355.073,6,6,8,14,10,4,,4,6,17,14,4,5,Oxidation (M),47173.168,Caveolae-associated protein 2 OS=Homo sapiens OX=9606 GN=CAVIN2 PE=1 SV=3
588,TRUE,P23470	PTPRG_HUMAN,234.72948,11,,524.26825,288.1823,,501.87173,,1750.9152,7071.8936,3320.963,3218.7422,2776.0999,4797.1475,11,3,3,1,,2,,12,14,9,7,5,10,,162003.47,Receptor-type tyrosine-protein phosphatase gamma OS=Homo sapiens OX=9606 GN=PTPRG PE=1 SV=4
86,TRUE,P50851	LRBA_HUMAN,387.3923,45,291.01047,4410.8276,21102.195,16274.342,6487.58,,4200.2773,15668.505,48018.87,38666.414,3810.1528,11808.137,45,5,9,48,47,25,8,21,26,61,58,19,27,Oxidation (M); Carbamidomethylation; Acetylation (N-term),319107.88,Lipopolysaccharide-responsive and beige-like anchor protein OS=Homo sapiens OX=9606 GN=LRBA PE=1 SV=4
1127,TRUE,Q99755	PI51A_HUMAN,125.738396,3,,1864.638,1492.1995,1283.1918,2017.6256,,433.19205,1379.9495,2850.1155,2165.617,631.75916,1182.5687,3,3,6,6,8,7,3,5,3,4,4,4,4,Oxidation (M); Carbamidomethylation,62633.32,Phosphatidylinositol 4-phosphate 5-kinase type-1 alpha OS=Homo sapiens OX=9606 GN=PIP5K1A PE=1 SV=1
201,TRUE,P54760	EPHB4_HUMAN,338.76184,24,2471.5796,4007.153,9235.781,4953.97,12179.3955,525.7755,15042.032,25442.172,20454.928,21831.598,8297.524,9064.276,16,18,20,30,29,30,19,34,37,33,29,28,31,Carbamidomethylation; Oxidation (M),108270.19,Ephrin type-B receptor 4 OS=Homo sapiens OX=9606 GN=EPHB4 PE=1 SV=2
1184,TRUE,O00750	P3C2B_HUMAN,117.595146,3,,,,,,,,,285.09625,101.887314,,,3,,1,,,,,,,2,3,,,,184767.84,Phosphatidylinositol 4-phosphate 3-kinase C2 domain-containing subunit beta OS=Homo sapiens OX=9606 GN=PIK3C2B PE=1 SV=2
831,TRUE,Q9BRQ8	FSP1_HUMAN,189.80498,7,,460.00427,2829.0808,1812.5813,,,,,1490.8333,1785.2655,,,7,1,4,9,7,,,,,4,7,,,Carbamidomethylation,40526.695,Ferroptosis suppressor protein 1 OS=Homo sapiens OX=9606 GN=AIFM2 PE=1 SV=1
435,FALSE,A4QPH2	PI4P2_HUMAN,94.14957,2,,,91.97351,,237.9403,,,,354.85022,285.58487,,,2,,,1,,3,,,,1,1,1,1,,66944.305,Putative phosphatidylinositol 4-kinase alpha-like protein P2 OS=Homo sapiens OX=9606 GN=PI4KAP2 PE=5 SV=3
576,TRUE,P55290	CAD13_HUMAN,242.401,10,,,,,,,4427.068,10910.983,7419.079,1457.9692,8370.465,5594.9414,10,,,,,,,10,15,7,9,17,11,Oxidation (M),78286.85,Cadherin-13 OS=Homo sapiens OX=9606 GN=CDH13 PE=1 SV=1
361,TRUE,P51149	RAB7A_HUMAN,299.567,13,22319.938,45517.5,322907.62,238552.39,86031.17,12690.751,22663.414,34468.867,148965.7,143117.17,14560.015,17335.217,13,31,27,54,62,35,24,21,20,37,36,15,20,Oxidation (M); Carbamidomethylation,23489.742,Ras-related protein Rab-7a OS=Homo sapiens OX=9606 GN=RAB7A PE=1 SV=1
963,TRUE,Q13564	ULA1_HUMAN,154.4142,5,,,456.5719,236.10179,,,,,506.70667,450.68604,,,5,,,2,5,2,1,1,2,3,4,,,Carbamidomethylation,60246.348,NEDD8-activating enzyme E1 regulatory subunit OS=Homo sapiens OX=9606 GN=NAE1 PE=1 SV=1
850,TRUE,Q9UBT7	CTNL1_HUMAN,202.73529,7,,20832.914,74396.914,61455.62,22927.217,,18512.68,23319.076,47082.01,33791.324,15078.561,5276.0693,7,,1,3,5,6,,9,8,1,4,1,1,Acetylation (N-term),81896.39,Alpha-catulin OS=Homo sapiens OX=9606 GN=CTNNAL1 PE=1 SV=2
1146,TRUE,Q5T3F8	CSCL2_HUMAN,124.86685,4,,,334.29214,215.11887,1134.3768,,586.5452,1078.2605,1837.3065,1406.4673,179.46288,242.05061,4,,,2,2,4,1,1,2,5,1,1,1,,94958.27,CSC1-like protein 2 OS=Homo sapiens OX=9606 GN=TMEM63B PE=1 SV=1
1071,TRUE,Q6T4R5	NHS_HUMAN,136.0892,4,,429.45438,,,209.37625,,,419.20102,,,,175.49359,4,2,3,,,1,,3,4,,,,3,,179135,Nance-Horan syndrome protein OS=Homo sapiens OX=9606 GN=NHS PE=1 SV=2
601,FALSE,Q9Y4E1	WAC2C_HUMAN,233.90552,9,,,2718.5308,2103.7168,363.87622,,189.79828,,5438.46,5829.79,,,9,,,8,6,2,,1,,7,8,,,,144911.14,WASH complex subunit 2C OS=Homo sapiens OX=9606 GN=WASHC2C PE=1 SV=4
81,TRUE,Q9NZB2	F120A_HUMAN,411.499,40,29906.293,63852.215,118286.766,79689.04,10370.928,610.41785,11010.461,23508.328,182547.48,172752.12,52868.03,64521.457,40,41,47,78,60,25,11,25,31,89,79,40,44,Carbamidomethylation; Oxidation (M),121887.69,Constitutive coactivator of PPAR-gamma-like protein 1 OS=Homo sapiens OX=9606 GN=FAM120A PE=1 SV=2
291,TRUE,Q12959	DLG1_HUMAN,316.6656,21,3029.5806,5666.0093,14840.115,12378.377,13273.539,534.50085,7861.555,8149.583,16535.684,19703.615,3549.2834,5773.2427,20,16,17,25,19,22,11,22,21,18,20,14,11,Oxidation (M); Carbamidomethylation,100455.016,Disks large homolog 1 OS=Homo sapiens OX=9606 GN=DLG1 PE=1 SV=2
1201,TRUE,O14640	DVL1_HUMAN,105.82118,3,,,177.48349,90.44724,,,,,,,,,2,3,1,1,2,1,,,,,1,,,Oxidation (M),75186.75,Segment polarity protein dishevelled homolog DVL-1 OS=Homo sapiens OX=9606 GN=DVL1 PE=1 SV=2
810,FALSE,Q9Y4J8	DTNA_HUMAN,154.44717,4,320.33618,,,706.56433,1255.4766,,801.07245,4345.663,555.26215,,539.8836,2020.0962,4,2,1,1,3,2,3,1,4,1,,2,2,,83901.03,Dystrobrevin alpha OS=Homo sapiens OX=9606 GN=DTNA PE=1 SV=2
203,TRUE,P16070	CD44_HUMAN,357.77936,22,577667.25,896075.94,575783.25,450430.8,740673.75,165873.6,636924.9,914688.94,902235.9,921361.94,737681.2,939678.4,22,64,94,69,51,59,41,72,109,98,108,103,109,Carbamidomethylation; Oxidation (M),81537.62,CD44 antigen OS=Homo sapiens OX=9606 GN=CD44 PE=1 SV=3
824,TRUE,Q9NXR1	NDE1_HUMAN,191.00119,7,,710.1473,1480.6393,901.12976,324.78888,,,193.05695,1141.904,246.49698,522.4305,94.23114,7,,2,6,5,4,1,1,1,5,7,1,2,,37720.56,Nuclear distribution protein nudE homolog 1 OS=Homo sapiens OX=9606 GN=NDE1 PE=1 SV=3
47,TRUE,Q14517	FAT1_HUMAN,430.87967,64,21594.023,49130.08,22682.021,17828.223,33540.65,1465.9397,11897.256,23398.408,32007.521,28349.049,13240.516,19582.525,64,71,81,58,53,73,40,53,55,48,55,47,54,Oxidation (M); Carbamidomethylation,506272.75,Protocadherin Fat 1 OS=Homo sapiens OX=9606 GN=FAT1 PE=1 SV=2
1416,TRUE,O00560	SDCB1_HUMAN,101.93547,2,,,569.18695,382.19266,,,,,225.08545,500.37216,,,2,,,4,2,4,,,,1,2,,,Carbamidomethylation,32444.385,Syntenin-1 OS=Homo sapiens OX=9606 GN=SDCBP PE=1 SV=1
239,TRUE,Q9H6S3	ES8L2_HUMAN,325.18393,21,403.95416,2174.8271,11808.137,7717.9253,18591.19,1437.8325,6993.117,19182.465,20226.725,15489.94,1341.7356,3224.9585,21,3,4,29,24,30,19,18,32,24,28,4,4,Carbamidomethylation; Oxidation (M),80620.61,Epidermal growth factor receptor kinase substrate 8-like protein 2 OS=Homo sapiens OX=9606 GN=EPS8L2 PE=1 SV=2
489,TRUE,Q86X29	LSR_HUMAN,270.29776,12,9004.774,15935.206,18440.793,13960.338,2300.88,,224.78032,293.57916,36422.984,43101.39,13503.542,15336.605,12,14,16,18,19,6,2,3,3,28,21,17,14,Oxidation (M),71438.875,Lipolysis-stimulated lipoprotein receptor OS=Homo sapiens OX=9606 GN=LSR PE=1 SV=4
1160,TRUE,O14939	PLD2_HUMAN,143.38768,3,,,2726.292,1378.2847,855.76776,,,482.62433,2170.7588,1680.3567,,345.38696,3,,,4,3,3,,,1,3,3,,1,,105987.11,Phospholipase D2 OS=Homo sapiens OX=9606 GN=PLD2 PE=1 SV=2
1046,TRUE,O60669	MOT2_HUMAN,173.39574,5,6118.224,11390.029,11598.806,8600.49,,,,193.73479,34321.55,34812.316,17980.354,23065.129,5,5,5,5,5,2,,6,2,7,6,10,9,,52200.242,Monocarboxylate transporter 2 OS=Homo sapiens OX=9606 GN=SLC16A7 PE=1 SV=2
495,FALSE,O60551	NMT2_HUMAN,113.78912,2,199.95743,832.711,3440.5747,1994.5342,721.3749,,,1326.0201,930.81537,5203.5703,511.60895,493.42328,2,2,1,4,4,2,,1,2,2,5,1,1,Oxidation (M); Carbamidomethylation,56980.22,Glycylpeptide N-tetradecanoyltransferase 2 OS=Homo sapiens OX=9606 GN=NMT2 PE=1 SV=1
953,TRUE,Q96SB3	NEB2_HUMAN,189.43765,6,,,2580.1692,659.9171,223.71465,,,297.42725,3014.382,3475.4165,,,6,,1,7,5,2,,,3,10,8,,,,89334.22,Neurabin-2 OS=Homo sapiens OX=9606 GN=PPP1R9B PE=1 SV=3
177,TRUE,P54753	EPHB3_HUMAN,349.65384,24,10870.972,30588.54,10462.469,9109.015,19287.78,2818.416,7643.4775,17550.443,22230.756,23389.941,15636.296,21786.053,13,33,46,32,36,34,30,34,36,41,34,41,38,Oxidation (M); Carbamidomethylation,110329.88,Ephrin type-B receptor 3 OS=Homo sapiens OX=9606 GN=EPHB3 PE=1 SV=2
1425,TRUE,O75712	CXB3_HUMAN,126.050354,2,704.45715,679.1682,4086.1387,1766.011,3457.451,149.22018,195.20319,1186.1339,,3226.9346,351.54587,840.2213,2,6,3,3,2,4,7,2,3,1,2,1,5,,30817.998,Gap junction beta-3 protein OS=Homo sapiens OX=9606 GN=GJB3 PE=1 SV=1
733,TRUE,Q13017	RHG05_HUMAN,207.04597,9,,,237.10645,,,,,122.81392,402.10953,652.3431,,,9,,,3,1,2,,1,3,8,8,,,,172460.02,Rho GTPase-activating protein 5 OS=Homo sapiens OX=9606 GN=ARHGAP5 PE=1 SV=2
1023,TRUE,Q7Z3J2	VP35L_HUMAN,168.00224,5,,,508.4771,174.23892,,,,112.59598,844.84576,2049.7412,,,5,,,2,4,,,1,2,3,5,1,1,Carbamidomethylation,109562.586,VPS35 endosomal protein-sorting factor-like OS=Homo sapiens OX=9606 GN=VPS35L PE=1 SV=2
535,TRUE,Q9NZU0	FLRT3_HUMAN,234.62343,12,2346.5159,1778.4552,1335.4292,378.53296,7824.818,250.21564,2434.265,2848.5627,2132.1138,980.15546,1499.5521,1902.9207,12,8,11,5,4,9,6,10,8,5,2,9,9,Oxidation (M),73003.54,Leucine-rich repeat transmembrane protein FLRT3 OS=Homo sapiens OX=9606 GN=FLRT3 PE=1 SV=1
1109,TRUE,Q7L5N7	PCAT2_HUMAN,158.92477,4,362.81717,1670.8015,530.31067,1152.0198,296.23846,,,,2139.6538,1906.5955,,276.60144,4,3,2,4,4,1,,1,,5,5,1,2,Acetylation (N-term); Oxidation (M),60207.863,Lysophosphatidylcholine acyltransferase 2 OS=Homo sapiens OX=9606 GN=LPCAT2 PE=1 SV=1
272,TRUE,Q15582	BGH3_HUMAN,305.16232,17,7618.3135,15089.121,32093.693,22847.627,14241.903,992.85376,2548.8496,5240.0234,26767.258,41769.11,8164.965,7576.179,17,17,22,28,22,15,4,7,8,25,31,12,11,Oxidation (M),74680.9,Transforming growth factor-beta-induced protein ig-h3 OS=Homo sapiens OX=9606 GN=TGFBI PE=1 SV=1
278,TRUE,P21589	5NTD_HUMAN,315.3249,19,3223.9487,6835.798,6602.6123,6672.781,23019.621,1794.6918,14141.278,25448.727,8284.383,6335.411,5861.9214,6223.6616,19,17,22,17,15,33,17,26,34,11,9,14,20,Acetylation (N-term); Oxidation (M),63367.742,5'-nucleotidase OS=Homo sapiens OX=9606 GN=NT5E PE=1 SV=1
717,TRUE,Q13488	VPP3_HUMAN,206.92114,8,,,2334.7798,2561.1685,1065.9838,,,,2116.9946,1509.5164,,,8,,,9,9,6,2,1,1,6,4,,,Oxidation (M),92968.03,V-type proton ATPase 116 kDa subunit a3 OS=Homo sapiens OX=9606 GN=TCIRG1 PE=1 SV=3
1239,TRUE,Q6ZNJ1	NBEL2_HUMAN,134.06085,3,,,,,,,,,651.63855,909.13794,,,3,,,,,,,,,4,2,,,,302516.6,Neurobeachin-like protein 2 OS=Homo sapiens OX=9606 GN=NBEAL2 PE=1 SV=2
931,TRUE,P61966	AP1S1_HUMAN,178.32419,5,,,1641.3282,997.2278,,,,,156.34642,1385.8439,,,5,,,5,4,2,,,2,4,3,,,Oxidation (M); Carbamidomethylation,18732.967,AP-1 complex subunit sigma-1A OS=Homo sapiens OX=9606 GN=AP1S1 PE=1 SV=1
1235,TRUE,Q96GC9	VMP1_HUMAN,110.426704,3,,2736.593,9720.755,7681.799,1933.3715,297.3687,,1145.7144,10989.587,11127.826,1894.9178,678.80133,3,1,1,5,2,1,1,1,1,3,3,1,1,,46237.67,Vacuole membrane protein 1 OS=Homo sapiens OX=9606 GN=VMP1 PE=1 SV=1
500,TRUE,O15440	MRP5_HUMAN,219.81628,13,,,1513.0852,580.56195,4885.7744,,1511.7506,4342.624,3652.8977,2540.0945,,193.75531,13,1,,4,3,12,3,8,8,8,4,1,2,Oxidation (M); Carbamidomethylation,160660.36,Multidrug resistance-associated protein 5 OS=Homo sapiens OX=9606 GN=ABCC5 PE=1 SV=2
799,TRUE,Q12846	STX4_HUMAN,195.0932,8,,,3256.4536,2934.1172,1737.894,,191.51746,1341.7117,4773.8906,2452.5317,,,8,,,7,8,8,,2,7,6,8,,,,34179.93,Syntaxin-4 OS=Homo sapiens OX=9606 GN=STX4 PE=1 SV=2
688,TRUE,Q9BR76	COR1B_HUMAN,231.65215,7,1946.7645,2197.222,9659.493,5283.504,3438.2185,435.40656,1795.2876,3186.1733,8320.199,7564.4546,314.09927,571.0919,7,7,7,10,9,10,2,7,8,8,8,6,2,Oxidation (M); Carbamidomethylation,54234.65,Coronin-1B OS=Homo sapiens OX=9606 GN=CORO1B PE=1 SV=1
954,TRUE,P68402	PA1B2_HUMAN,156.03076,5,,128.08995,3118.6929,2994.6562,1176.9152,,634.5587,1930.7991,2235.947,5126.53,,,5,,2,5,6,5,1,3,5,7,6,,,Acetylation (N-term); Oxidation (M),25569.27,Platelet-activating factor acetylhydrolase IB subunit alpha2 OS=Homo sapiens OX=9606 GN=PAFAH1B2 PE=1 SV=1
901,TRUE,Q13490	BIRC2_HUMAN,133.96075,6,,,343.18976,,606.99176,,,1314.8069,866.6522,1041.6383,464.03693,,6,1,,2,,3,,,4,5,1,1,3,,69899.664,Baculoviral IAP repeat-containing protein 2 OS=Homo sapiens OX=9606 GN=BIRC2 PE=1 SV=2
15,TRUE,P08195	4F2_HUMAN,609.77106,120,1551411.6,2311681.8,4223065.5,3615418.5,6199967,2312170.5,5294521.5,6984796,5804553.5,5692332.5,2687232.5,3040540.8,120,226,251,359,336,465,288,490,589,545,545,304,345,Oxidation (M); Acetylation (N-term); Carbamidomethylation,67994,4F2 cell-surface antigen heavy chain OS=Homo sapiens OX=9606 GN=SLC3A2 PE=1 SV=3
1338,TRUE,P20827	EFNA1_HUMAN,95.656815,2,,,,,228.38013,,81.568924,814.843,,299.51703,,,2,,,,,1,,2,1,,2,,,,23787.066,Ephrin-A1 OS=Homo sapiens OX=9606 GN=EFNA1 PE=1 SV=2
76,TRUE,P08727	K1C19_HUMAN,403.06586,40,74070.516,148939.34,213993.6,174313.66,60261.816,3443.2896,150293.2,230458.7,591676.7,548858.44,188646.27,239266.81,36,42,67,82,73,26,20,79,87,136,128,90,92,Oxidation (M),44105.992,"Keratin, type I cytoskeletal 19 OS=Homo sapiens OX=9606 GN=KRT19 PE=1 SV=4"
756,TRUE,P51178	PLCD1_HUMAN,178.94168,8,,,,,1398.8066,,967.14923,2036.3145,1241.3461,1065.0392,,,8,,,2,,8,3,4,13,8,6,1,,,85664.97,"1-phosphatidylinositol 4,5-bisphosphate phosphodiesterase delta-1 OS=Homo sapiens OX=9606 GN=PLCD1 PE=1 SV=2"
1295,TRUE,Q9UBC9	SPRR3_HUMAN,98.49274,2,,,550.64795,148.18936,214.25833,,,,,,,,2,1,3,2,4,6,1,,,,,,,,18153.941,Small proline-rich protein 3 OS=Homo sapiens OX=9606 GN=SPRR3 PE=1 SV=2
702,TRUE,Q9H0U3	MAGT1_HUMAN,178.6464,6,549.80945,1837.3519,11023.59,7341.381,9067.141,366.76846,2504.4912,4917.6387,10865.094,7118.1445,533.9897,1035.8147,6,8,3,9,11,6,3,8,3,6,11,4,2,Oxidation (M),38036.625,Magnesium transporter protein 1 OS=Homo sapiens OX=9606 GN=MAGT1 PE=1 SV=1
229,TRUE,O00443	P3C2A_HUMAN,282.4144,24,415.7004,1645.9288,3789.1282,1832.3574,,,,858.60516,6410.2744,12341.879,1180.263,2979.4949,24,8,9,15,13,1,,4,5,13,20,10,18,Acetylation (N-term),190679.56,Phosphatidylinositol 4-phosphate 3-kinase C2 domain-containing subunit alpha OS=Homo sapiens OX=9606 GN=PIK3C2A PE=1 SV=2
1158,TRUE,Q9UBL6	CPNE7_HUMAN,84.55438,3,,,,,,,,,82.345505,,,,2,,,1,1,,,1,1,3,1,,1,,70293.89,Copine-7 OS=Homo sapiens OX=9606 GN=CPNE7 PE=1 SV=1
787,TRUE,P18615	NELFE_HUMAN,186.3679,7,,,1571.901,,,,,,2343.9941,3936.7202,,213.44214,7,,2,7,3,,,1,,7,11,,1,Oxidation (M); Carbamidomethylation,43239.797,Negative elongation factor E OS=Homo sapiens OX=9606 GN=NELFE PE=1 SV=3
607,TRUE,P62070	RRAS2_HUMAN,227.60912,8,1302.3546,1761.0449,10611.255,7464.75,6132.7695,,2098.7075,1876.813,11408.1875,9467.784,2022.27,3566.752,6,4,7,11,10,6,4,7,7,12,16,5,5,Carbamidomethylation; Oxidation (M),23399.564,Ras-related protein R-Ras2 OS=Homo sapiens OX=9606 GN=RRAS2 PE=1 SV=1
677,TRUE,Q08188	TGM3_HUMAN,222.07191,8,,254.65811,28990.52,2493.8494,9526.959,,258.99994,394.0929,,,,,8,,1,12,11,2,,1,1,,,,,Oxidation (M),76631.83,Protein-glutamine gamma-glutamyltransferase E OS=Homo sapiens OX=9606 GN=TGM3 PE=1 SV=4
741,TRUE,Q16222	UAP1_HUMAN,221.8034,8,,,7350.474,4357.4824,337.82263,,448.0674,580.5395,5347.1885,6785.1846,130.47467,,8,1,2,10,9,6,2,4,5,11,13,1,2,Oxidation (M),58769.027,UDP-N-acetylhexosamine pyrophosphorylase OS=Homo sapiens OX=9606 GN=UAP1 PE=1 SV=3
696,TRUE,P29353	SHC1_HUMAN,194.54947,8,,1544.7155,675.4111,,1044.2892,,416.01373,413.35507,429.92102,1861.6787,1845.3049,2230.565,8,4,7,4,2,8,,5,6,9,4,6,10,Carbamidomethylation; Oxidation (M),62822.098,SHC-transforming protein 1 OS=Homo sapiens OX=9606 GN=SHC1 PE=1 SV=4
93,TRUE,P07237	PDIA1_HUMAN,417.15964,41,40141.125,68993.86,1103846.4,782773.6,153019.03,36023.266,70006.8,80746.555,850688.56,844589.56,38797.875,78003.195,40,33,40,135,117,47,37,39,46,126,128,33,34,Oxidation (M); Carbamidomethylation,57116.363,Protein disulfide-isomerase OS=Homo sapiens OX=9606 GN=P4HB PE=1 SV=3
809,TRUE,O95490	AGRL2_HUMAN,187.06635,8,,823.1221,162.25249,,1778.9128,,,,,,,,8,5,8,5,3,8,5,,,,,,,Oxidation (M),163348.94,Adhesion G protein-coupled receptor L2 OS=Homo sapiens OX=9606 GN=ADGRL2 PE=1 SV=2
140,TRUE,P52789	HXK2_HUMAN,333.11044,26,4342.2505,6561.904,105733.31,84199.78,35992.59,5596.331,14821.505,28585.674,93360.766,87561.52,9261.131,13526.117,26,18,16,42,41,21,20,21,25,45,48,17,16,Carbamidomethylation; Oxidation (M); Acetylation (N-term),102379.8,Hexokinase-2 OS=Homo sapiens OX=9606 GN=HK2 PE=1 SV=2
695,TRUE,Q9P289	STK26_HUMAN,242.41771,9,1402.9946,2550.4683,11749.674,9715.554,8520.526,194.43564,5834.9272,6504.121,12680.385,19346.643,3390.2844,2474.0493,9,6,4,9,6,9,4,15,11,11,12,5,6,Carbamidomethylation,46528.812,Serine/threonine-protein kinase 26 OS=Homo sapiens OX=9606 GN=STK26 PE=1 SV=2
937,TRUE,Q9HCL2	GPAT1_HUMAN,171.59885,6,,612.4229,3708.1895,1197.5034,,,,,2152.253,2182.3325,,,6,3,2,11,6,1,,,1,3,2,,2,,93794.82,"Glycerol-3-phosphate acyltransferase 1, mitochondrial OS=Homo sapiens OX=9606 GN=GPAM PE=1 SV=3"
611,TRUE,Q14571	ITPR2_HUMAN,218.27959,10,,,,,,,,,653.0836,773.5851,,,4,5,4,10,6,2,2,1,3,11,9,5,3,Carbamidomethylation; Oxidation (M),308063.66,"Inositol 1,4,5-trisphosphate receptor type 2 OS=Homo sapiens OX=9606 GN=ITPR2 PE=1 SV=2"
213,TRUE,P35052	GPC1_HUMAN,331.79797,22,21447.76,38294.5,55588.074,41586.773,71791.6,17326.797,57565.992,99785.92,67593.38,71802.84,29608.305,41501.895,22,24,26,32,31,40,31,33,53,35,35,26,31,Carbamidomethylation; Oxidation (M),61680.223,Glypican-1 OS=Homo sapiens OX=9606 GN=GPC1 PE=1 SV=2
1248,TRUE,Q5T1C6	THEM4_HUMAN,122.094696,2,,,916.0899,694.5668,2552.928,278.1186,,,,,,,2,,,3,1,3,1,,1,,,,,Oxidation (M),27129.621,Acyl-coenzyme A thioesterase THEM4 OS=Homo sapiens OX=9606 GN=THEM4 PE=1 SV=1
490,TRUE,P50552	VASP_HUMAN,203.88992,10,,198.90808,5852.219,4914.2856,3084.5679,170.31018,717.54596,2722.1982,12271.751,13638.742,191.09023,304.92432,10,1,1,9,12,7,2,3,9,11,14,2,2,Oxidation (M); Carbamidomethylation,39829.723,Vasodilator-stimulated phosphoprotein OS=Homo sapiens OX=9606 GN=VASP PE=1 SV=3
675,TRUE,P40818	UBP8_HUMAN,171.9909,9,,,3099.4028,1642.562,,,,284.67224,3747.2651,3746.1118,220.74115,149.35864,9,1,1,9,7,5,,2,3,6,11,3,1,Oxidation (M),127523.22,Ubiquitin carboxyl-terminal hydrolase 8 OS=Homo sapiens OX=9606 GN=USP8 PE=1 SV=1
432,TRUE,P08754	GNAI3_HUMAN,287.78326,14,1496.6493,4656.67,11467.767,7039.6465,14410.82,211.71396,5391.834,13568.786,8363.193,5231.8423,1665.9229,808.106,9,18,11,33,27,29,18,22,37,23,20,8,15,Carbamidomethylation; Oxidation (M),40532.188,Guanine nucleotide-binding protein G(i) subunit alpha OS=Homo sapiens OX=9606 GN=GNAI3 PE=1 SV=3
68,TRUE,P06576	ATPB_HUMAN,429.6178,37,38996.883,97015.09,726281.6,553474.2,190140.25,33544.297,76059.79,125244.24,1030572.5,1026108.75,53426.285,74288.6,37,46,61,202,181,104,49,64,75,220,213,49,55,Oxidation (M),56559.9,"ATP synthase subunit beta, mitochondrial OS=Homo sapiens OX=9606 GN=ATP5F1B PE=1 SV=3"
36,TRUE,P05023	AT1A1_HUMAN,500.31793,64,288054.7,470747.3,885051.06,671839.56,1389511.8,368323.1,1080849.5,1598395.8,1294933.4,1329621.6,477985.28,602543.94,50,132,179,193,202,253,177,240,275,252,248,169,189,Carbamidomethylation; Oxidation (M),112896.09,Sodium/potassium-transporting ATPase subunit alpha-1 OS=Homo sapiens OX=9606 GN=ATP1A1 PE=1 SV=1
40,TRUE,P07900	HS90A_HUMAN,482.16327,59,21181.6,40856.215,635261.25,525849.2,167592.45,31083.482,121055.26,192438.38,647002.25,658778.7,56722.785,44363.22,32,68,73,229,214,118,80,129,126,244,255,82,74,Carbamidomethylation; Oxidation (M); Acetylation (N-term),84659.71,Heat shock protein HSP 90-alpha OS=Homo sapiens OX=9606 GN=HSP90AA1 PE=1 SV=5
948,TRUE,Q9Y487	VPP2_HUMAN,149.51787,6,,,2119.5498,1151.8212,668.26306,,,,819.97766,286.7517,,,6,,,6,5,7,,,,3,4,,1,Oxidation (M),98082.32,V-type proton ATPase 116 kDa subunit a2 OS=Homo sapiens OX=9606 GN=ATP6V0A2 PE=1 SV=2
162,TRUE,P23743	DGKA_HUMAN,365.01187,27,9695.146,20240.85,28905.91,21272.059,6800.842,93.30323,2503.712,6594.8853,31646.297,29344.125,10881.089,12267.654,27,21,29,31,38,18,8,14,19,34,28,18,20,Oxidation (M); Carbamidomethylation,82630.21,Diacylglycerol kinase alpha OS=Homo sapiens OX=9606 GN=DGKA PE=1 SV=3
568,TRUE,O14763	TR10B_HUMAN,235.3364,9,756.51526,3631.5247,7235.586,5781.1064,6596.9585,,7148.8115,11783.571,21166.852,20122.982,4584.138,6448.779,9,8,9,8,6,11,7,12,13,20,22,16,16,Oxidation (M),47878.3,Tumor necrosis factor receptor superfamily member 10B OS=Homo sapiens OX=9606 GN=TNFRSF10B PE=1 SV=2
395,TRUE,Q13033	STRN3_HUMAN,285.54495,15,548.90576,3458.3867,15677.014,10705.47,2635.9512,,224.80206,1515.4607,14587.221,15363.922,,447.28314,15,7,11,20,18,8,2,5,8,16,21,3,4,Oxidation (M); Carbamidomethylation,87209.32,Striatin-3 OS=Homo sapiens OX=9606 GN=STRN3 PE=1 SV=3
698,TRUE,Q9Y2Q5	LTOR2_HUMAN,171.38245,5,,,17901.502,15195.482,,,,,6261.325,2874.5737,,,5,,3,15,14,2,1,,,9,7,1,,Oxidation (M); Carbamidomethylation,13507.504,Ragulator complex protein LAMTOR2 OS=Homo sapiens OX=9606 GN=LAMTOR2 PE=1 SV=1
1335,TRUE,P01034	CYTC_HUMAN,70.75378,2,,,168.18185,,,,,,,,,,2,,,2,1,1,,,,,,,,,15799.219,Cystatin-C OS=Homo sapiens OX=9606 GN=CST3 PE=1 SV=1
693,FALSE,P0CG47	UBB_HUMAN,199.14592,5,88056.43,137605.64,271798.94,258485.02,322625.5,142883.31,218658.83,303838.88,318691.06,325820.25,99666.38,124832.11,5,15,16,23,24,22,15,15,21,21,27,16,14,,25761.639,Polyubiquitin-B OS=Homo sapiens OX=9606 GN=UBB PE=1 SV=1
747,TRUE,Q0JRZ9	FCHO2_HUMAN,202.96584,8,,,754.0491,541.82446,1045.9951,,783.0503,1096.0675,1115.7897,983.6979,,,8,,,8,5,5,,4,6,10,4,,,Oxidation (M),88924.43,F-BAR domain only protein 2 OS=Homo sapiens OX=9606 GN=FCHO2 PE=1 SV=2
728,TRUE,Q9BXS9	S26A6_HUMAN,214.59993,6,,,1025.1555,,3712.7415,112.33716,2629.9263,4795.904,3751.89,4570.784,,,6,,,5,3,5,4,4,8,7,6,,,Carbamidomethylation; Oxidation (M),82966.75,Solute carrier family 26 member 6 OS=Homo sapiens OX=9606 GN=SLC26A6 PE=1 SV=1
341,TRUE,Q9UBC2	EP15R_HUMAN,288.4418,17,,,5188.017,3872.4807,794.2197,,875.2186,1091.5505,12133.04,11569.839,,,17,,1,18,14,7,,9,10,15,17,1,1,Carbamidomethylation; Oxidation (M),94255.086,Epidermal growth factor receptor substrate 15-like 1 OS=Homo sapiens OX=9606 GN=EPS15L1 PE=1 SV=1
158,TRUE,O95714	HERC2_HUMAN,307.13904,33,567741.25,485112.7,321723.94,370328.6,278586.6,446909.44,481947.72,310771.7,190689.08,174141.14,363145.28,416250.2,33,18,20,27,26,10,6,7,8,34,33,18,24,Carbamidomethylation,527227.9,E3 ubiquitin-protein ligase HERC2 OS=Homo sapiens OX=9606 GN=HERC2 PE=1 SV=2
1301,TRUE,Q9BZM4	ULBP3_HUMAN,80.41386,2,,456.7478,,,434.55914,,367.23648,1040.8739,,,397.1549,602.2888,2,,1,,,2,,3,2,,,1,1,Oxidation (M),27949.3,UL16-binding protein 3 OS=Homo sapiens OX=9606 GN=ULBP3 PE=1 SV=1
470,TRUE,Q96JJ7	TMX3_HUMAN,263.9199,12,,408.2149,15401.2705,13505.984,8252.649,1338.4181,4298.37,21552.906,20477.545,19219.771,2568.496,418.57587,11,2,1,12,14,9,5,12,13,19,18,5,2,Oxidation (M); Carbamidomethylation,51871.98,Protein disulfide-isomerase TMX3 OS=Homo sapiens OX=9606 GN=TMX3 PE=1 SV=2
281,TRUE,O94905	ERLN2_HUMAN,297.3642,14,9402.33,11679.581,51586.695,51447.324,68989.96,12754.299,23940.078,36625.516,142852.28,116969.74,15113.611,21221.074,14,11,15,39,37,35,32,28,27,29,37,20,21,Carbamidomethylation; Oxidation (M),37839.54,Erlin-2 OS=Homo sapiens OX=9606 GN=ERLIN2 PE=1 SV=1
53,TRUE,Q6YHK3	CD109_HUMAN,484.0808,53,329460.75,529908.94,220415.97,158549.64,378525.94,74221.47,361877.53,555093.4,392576.25,419541.4,519302.97,594010.4,53,115,142,81,81,112,80,103,125,108,118,141,147,Carbamidomethylation; Oxidation (M),161689.08,CD109 antigen OS=Homo sapiens OX=9606 GN=CD109 PE=1 SV=2
1010,TRUE,Q9NRM0	GTR9_HUMAN,179.9271,5,,,650.16656,620.10913,1826.1304,,1523.2975,3865.6738,1993.9724,4136.4795,121.172386,753.67676,5,,,2,2,5,6,4,6,4,3,3,3,Carbamidomethylation,58701.824,"Solute carrier family 2, facilitated glucose transporter member 9 OS=Homo sapiens OX=9606 GN=SLC2A9 PE=1 SV=2"
328,TRUE,O00468	AGRIN_HUMAN,292.9174,18,,300.12848,5491.5493,3020.8574,7599.67,,6274.493,10969.649,11256.238,10226.633,327.0094,276.74405,18,,3,8,7,15,7,21,23,15,17,5,3,Oxidation (M),217319.53,Agrin OS=Homo sapiens OX=9606 GN=AGRN PE=1 SV=6
551,TRUE,Q9ULV4	COR1C_HUMAN,295.71368,12,3595.2002,6883.6465,43787.305,42124.926,23829.287,3667.5315,20926.74,37952.055,69430.21,65244.637,7441.5615,9676.854,12,8,10,19,21,17,9,14,15,21,22,5,8,Carbamidomethylation,53249.04,Coronin-1C OS=Homo sapiens OX=9606 GN=CORO1C PE=1 SV=1
716,TRUE,P36543	VATE1_HUMAN,160.65907,5,460.72247,,11927.834,8085.63,102.91454,,412.43066,,8035.8486,7778.855,,,5,2,1,9,6,2,,1,,10,6,,1,Oxidation (M),26145.3,V-type proton ATPase subunit E 1 OS=Homo sapiens OX=9606 GN=ATP6V1E1 PE=1 SV=1
129,TRUE,P30519	HMOX2_HUMAN,392.47406,24,49861.594,144319.61,339295.8,223240.39,36252.105,2766.966,3121.088,15873.954,207083.98,152118.27,30793.336,41629.457,24,64,72,106,100,47,16,21,21,68,69,42,43,Oxidation (M); Carbamidomethylation; Acetylation (N-term),36032.867,Heme oxygenase 2 OS=Homo sapiens OX=9606 GN=HMOX2 PE=1 SV=2
634,TRUE,P49585	PCY1A_HUMAN,227.44086,9,733.5831,4642.4487,7411.8423,5271.842,956.2003,,268.387,227.47299,6471.542,9446.373,1804.9556,1193.3324,9,3,9,8,7,4,2,1,1,12,13,7,7,Oxidation (M),41731,Choline-phosphate cytidylyltransferase A OS=Homo sapiens OX=9606 GN=PCYT1A PE=1 SV=2
1399,TRUE,Q8N5C8	TAB3_HUMAN,97.76596,2,,,,660.0651,,,,,,,,,2,,,1,1,,,,,,1,,,,78652.86,TGF-beta-activated kinase 1 and MAP3K7-binding protein 3 OS=Homo sapiens OX=9606 GN=TAB3 PE=1 SV=3
519,TRUE,Q8NB49	AT11C_HUMAN,254.96889,12,195.53633,1120.1722,1991.3739,246.73943,2138.1846,,1378.7627,1917.0756,5036.9385,5297.1484,1188.2103,1210.1777,12,4,4,8,2,5,1,6,13,11,13,5,6,Oxidation (M),129477.17,Phospholipid-transporting ATPase IG OS=Homo sapiens OX=9606 GN=ATP11C PE=1 SV=3
753,TRUE,Q13613	MTMR1_HUMAN,220.28876,7,,486.14825,,,,,,,1265.8875,425.96423,166.27695,708.1807,6,1,5,2,2,,,,2,9,6,5,6,Oxidation (M); Carbamidomethylation,74677.76,Myotubularin-related protein 1 OS=Homo sapiens OX=9606 GN=MTMR1 PE=1 SV=4
366,TRUE,Q7KZI7	MARK2_HUMAN,274.63123,15,,1910.8586,8156.0454,5490.2485,848.59064,,93.83238,756.11005,1988.5914,1770.6906,,,12,3,7,15,21,15,6,6,11,16,14,3,1,Oxidation (M); Carbamidomethylation,87910.75,Serine/threonine-protein kinase MARK2 OS=Homo sapiens OX=9606 GN=MARK2 PE=1 SV=2
29,TRUE,Q86UP2	KTN1_HUMAN,456.9423,72,56237.523,106451.28,293439.22,221968.8,111072.75,12850.951,43351.04,74982.02,268755.28,262102.42,34291.664,39891.5,72,61,85,143,127,82,44,64,66,126,135,61,60,Oxidation (M); Carbamidomethylation,156275.25,Kinectin OS=Homo sapiens OX=9606 GN=KTN1 PE=1 SV=1
973,TRUE,P26045	PTN3_HUMAN,138.55733,5,,83.4454,,171.22589,,,75.15433,214.16444,,,,,5,,2,,1,3,3,1,2,,,1,2,,103989.84,Tyrosine-protein phosphatase non-receptor type 3 OS=Homo sapiens OX=9606 GN=PTPN3 PE=1 SV=2
1287,TRUE,O75954	TSN9_HUMAN,105.49211,2,,,,,619.1735,,239.61015,344.6744,,,,,2,,,1,,2,1,2,1,,,,,Oxidation (M),26778.916,Tetraspanin-9 OS=Homo sapiens OX=9606 GN=TSPAN9 PE=1 SV=1
750,TRUE,Q9UM47	NOTC3_HUMAN,195.27246,7,,844.2695,,218.50339,,,,,,,,,4,5,8,4,12,4,1,2,5,5,4,1,2,Oxidation (M),243631.3,Neurogenic locus notch homolog protein 3 OS=Homo sapiens OX=9606 GN=NOTCH3 PE=1 SV=2
984,TRUE,Q9Y2G3	AT11B_HUMAN,144.10501,5,,,555.0378,660.4686,,,,,,,,,5,,,4,3,,,,,,,,,Oxidation (M); Carbamidomethylation,134189.83,Probable phospholipid-transporting ATPase IF OS=Homo sapiens OX=9606 GN=ATP11B PE=1 SV=2
803,TRUE,Q8NBS3	S4A11_HUMAN,212.76857,7,764.7889,1843.1523,1832.9702,928.38477,2884.1328,,972.5343,2456.7366,3305.341,3464.3381,1479.6724,1901.9185,7,3,4,5,3,8,2,2,8,5,5,4,6,Oxidation (M),99580.75,Sodium bicarbonate transporter-like protein 11 OS=Homo sapiens OX=9606 GN=SLC4A11 PE=1 SV=2
134,FALSE,Q2Y0W8	S4A8_HUMAN,154.74408,3,,,531.5607,343.85495,1680.1907,,1128.6936,140.97456,3662.3174,3816.025,,,3,,,1,2,3,2,3,4,6,5,,,Oxidation (M),122937.75,Electroneutral sodium bicarbonate exchanger 1 OS=Homo sapiens OX=9606 GN=SLC4A8 PE=1 SV=1
917,TRUE,P43121	MUC18_HUMAN,200.81245,6,,,,,,,1240.2971,4302.365,2551.4617,2725.3062,86.46988,153.14627,6,,,,,,,8,5,4,3,1,2,Oxidation (M),71607.4,Cell surface glycoprotein MUC18 OS=Homo sapiens OX=9606 GN=MCAM PE=1 SV=2
1091,TRUE,Q00536	CDK16_HUMAN,130.28264,4,,1034.5677,806.49207,342.5191,1236.1625,,704.32385,,869.9668,665.6275,572.9246,669.9881,4,1,4,3,2,3,1,4,2,3,2,1,1,Carbamidomethylation,55715.69,Cyclin-dependent kinase 16 OS=Homo sapiens OX=9606 GN=CDK16 PE=1 SV=1
613,TRUE,Q8WUD1	RAB2B_HUMAN,253.80098,10,4840.2627,8544.797,117556.47,88109.266,11194.745,1144.0533,4827.769,6536.0615,65660.84,62237.61,3526.1943,3547.5212,10,12,10,25,23,16,2,10,5,19,21,3,2,Oxidation (M); Carbamidomethylation,24214.357,Ras-related protein Rab-2B OS=Homo sapiens OX=9606 GN=RAB2B PE=1 SV=1
737,TRUE,Q9UHN6	CEIP2_HUMAN,189.23102,9,277.05258,4390.4673,2457.7866,1068.9335,2476.304,,304.38214,737.59326,1366.0144,583.0476,840.06934,225.33875,9,4,6,4,4,11,2,1,3,3,1,2,4,Oxidation (M),154373.7,Cell surface hyaluronidase OS=Homo sapiens OX=9606 GN=CEMIP2 PE=1 SV=1
720,TRUE,Q8WUM9	S20A1_HUMAN,195.37645,8,,277.154,3135.2012,3044.326,7158.864,,1453.1913,9597.925,3846.1887,3002.6533,1122.3058,,8,1,2,2,3,5,4,6,10,12,13,1,2,Oxidation (M); Carbamidomethylation,73699.67,Sodium-dependent phosphate transporter 1 OS=Homo sapiens OX=9606 GN=SLC20A1 PE=1 SV=1
71,TRUE,Q92817	EVPL_HUMAN,415.10147,52,2286.6062,6571.2495,53449.418,33812.04,9989.242,,2765.6624,6594.1035,35824.047,31874.3,1755.6375,2306.5586,52,25,29,77,58,26,15,19,25,59,52,10,11,Carbamidomethylation; Oxidation (M),231604.11,Envoplakin OS=Homo sapiens OX=9606 GN=EVPL PE=1 SV=3
409,TRUE,P20592	MX2_HUMAN,263.77063,15,530.3475,1866.9905,6943.4487,5040.0566,,,,,,,,,13,10,15,24,18,5,5,,,,,,,Oxidation (M),82088.67,Interferon-induced GTP-binding protein Mx2 OS=Homo sapiens OX=9606 GN=MX2 PE=1 SV=1
1259,TRUE,Q96BI1	S22AI_HUMAN,128.38133,3,259.25922,911.97687,,2161.02,869.0725,,,386.84186,,2076.0647,697.0723,1220.5411,3,4,2,6,2,4,2,1,2,2,3,2,3,Carbamidomethylation,44845.52,Solute carrier family 22 member 18 OS=Homo sapiens OX=9606 GN=SLC22A18 PE=1 SV=3
808,TRUE,Q96IF1	AJUBA_HUMAN,188.35188,8,,1684.1531,1396.3798,989.2964,,,,,2019.6855,1231.6492,143.14185,417.05414,8,2,11,8,3,2,,,,4,4,3,1,Carbamidomethylation; Oxidation (M),56933.973,LIM domain-containing protein ajuba OS=Homo sapiens OX=9606 GN=AJUBA PE=1 SV=1
905,TRUE,O43464	HTRA2_HUMAN,216.93546,6,,244.18494,13261.816,10270.539,351.5211,,211.09195,672.4257,11560.838,9317.153,299.02362,445.87714,6,,2,9,7,3,,1,1,6,9,4,3,,48840.848,"Serine protease HTRA2, mitochondrial OS=Homo sapiens OX=9606 GN=HTRA2 PE=1 SV=2"
345,TRUE,Q8IVT2	MISP_HUMAN,281.74872,18,3842.9453,9207.713,21644.9,8768.159,2307.8535,,787.3667,3526.9077,32676.031,29894.322,5406.0747,5324.595,18,7,19,25,11,5,1,2,11,36,28,11,19,Carbamidomethylation,75356.516,Mitotic interactor and substrate of PLK1 OS=Homo sapiens OX=9606 GN=MISP PE=1 SV=1
1417,TRUE,Q86T24	KAISO_HUMAN,63.00094,2,,,274.78168,,,,,,,227.49284,,,2,,,4,,,,,,,3,,,,74484.49,Transcriptional regulator Kaiso OS=Homo sapiens OX=9606 GN=ZBTB33 PE=1 SV=2
350,TRUE,P19784	CSK22_HUMAN,313.32352,15,44437.984,83483.695,31627.096,30317.2,10210.106,963.83154,4236.182,8321.736,27950.154,25157.844,15922.453,23346.37,14,34,47,35,29,16,8,9,17,25,20,20,22,Oxidation (M); Carbamidomethylation,41213.23,Casein kinase II subunit alpha' OS=Homo sapiens OX=9606 GN=CSNK2A2 PE=1 SV=1
546,TRUE,Q9H4G0	E41L1_HUMAN,221.24576,12,15228.5625,16699.53,8904.508,411.0173,1066.6512,,14903.734,13672.213,10121.057,8030.551,,,10,2,2,7,6,6,1,3,6,9,6,,,Carbamidomethylation; Oxidation (M),98502.875,Band 4.1-like protein 1 OS=Homo sapiens OX=9606 GN=EPB41L1 PE=1 SV=2
1181,TRUE,Q13614	MTMR2_HUMAN,108.078575,3,,,,,,,,,,,,,2,,,1,,,,,,4,2,,,Carbamidomethylation,73381.22,Myotubularin-related protein 2 OS=Homo sapiens OX=9606 GN=MTMR2 PE=1 SV=4
457,TRUE,Q8NDI1	EHBP1_HUMAN,235.22267,14,,497.31134,2294.7207,1816.6289,1191.6744,,307.67984,833.62756,5818.8403,8379.27,1786.4226,747.7999,14,2,4,10,7,4,,3,3,16,10,10,5,,140017.3,EH domain-binding protein 1 OS=Homo sapiens OX=9606 GN=EHBP1 PE=1 SV=3
263,TRUE,Q96J02	ITCH_HUMAN,308.3387,21,617.6572,2052.3718,7553.582,6735.6226,9562.801,547.7669,6987.721,16332.523,12479.555,13539.68,2182.2158,3631.1057,19,10,14,17,17,20,13,21,18,15,11,13,12,Carbamidomethylation; Oxidation (M),102802.805,E3 ubiquitin-protein ligase Itchy homolog OS=Homo sapiens OX=9606 GN=ITCH PE=1 SV=2
24,FALSE,Q9Y4G6	TLN2_HUMAN,265.25842,9,,107.82211,5956.4346,6636.235,2178.35,139.52354,5395.4478,9147.135,11275.933,13450.609,331.52576,411.90436,9,1,1,5,12,4,3,5,9,12,17,2,1,Carbamidomethylation; Oxidation (M),271613.06,Talin-2 OS=Homo sapiens OX=9606 GN=TLN2 PE=1 SV=4
527,TRUE,Q6P1N0	C2D1A_HUMAN,218.43,12,132.41306,995.18896,1115.6705,1559.6693,,,,487.5909,2025.4669,3190.9004,440.91415,1152.0217,12,4,10,6,9,,,1,2,13,10,5,12,Carbamidomethylation,104062.47,Coiled-coil and C2 domain-containing protein 1A OS=Homo sapiens OX=9606 GN=CC2D1A PE=1 SV=1
1422,TRUE,P40855	PEX19_HUMAN,58.25489,2,,,,,,,,,,,,,2,,,,,1,,,,1,,,,Oxidation (M),32806.5,Peroxisomal biogenesis factor 19 OS=Homo sapiens OX=9606 GN=PEX19 PE=1 SV=1
149,TRUE,P12830	CADH1_HUMAN,421.43143,28,341411.97,555160.8,408374.12,325464.56,415242.8,70421.36,317603.66,456914.47,430445.16,628014.1,448897.9,537227.56,26,82,93,81,87,82,49,83,91,91,98,79,90,Carbamidomethylation; Oxidation (M),97456.15,Cadherin-1 OS=Homo sapiens OX=9606 GN=CDH1 PE=1 SV=3
1174,TRUE,Q5JTD0	TJAP1_HUMAN,112.36279,3,235.71326,648.77924,732.04694,251.28314,1222.8586,,525.23975,861.7064,1272.6787,1631.5518,360.95743,804.89496,3,2,2,1,1,3,1,1,1,1,2,1,2,,61821.242,Tight junction-associated protein 1 OS=Homo sapiens OX=9606 GN=TJAP1 PE=1 SV=1
1095,TRUE,Q9Y287	ITM2B_HUMAN,153.18695,4,839.5503,1719.0841,1315.3962,1716.7004,1832.8383,223.5909,803.8124,1695.4756,2297.1252,,1658.8141,,4,2,2,2,3,2,1,2,4,2,1,1,1,,30338.035,Integral membrane protein 2B OS=Homo sapiens OX=9606 GN=ITM2B PE=1 SV=1
605,TRUE,P61421	VA0D1_HUMAN,254.35426,11,3450.5298,5038.399,51344.76,45321.3,18386.178,1653.6409,4414.4673,9104.307,25041.045,24168.535,2101.1504,1014.53436,11,4,2,15,21,7,7,7,5,13,13,5,3,Carbamidomethylation,40329.094,V-type proton ATPase subunit d 1 OS=Homo sapiens OX=9606 GN=ATP6V0D1 PE=1 SV=1
1179,TRUE,Q8N138	ORML3_HUMAN,116.832214,2,,,1957.3909,525.0609,,,,,1851.2236,972.87,,,2,,2,5,2,,,,,3,3,,,Acetylation (N-term); Oxidation (M),17494.646,ORM1-like protein 3 OS=Homo sapiens OX=9606 GN=ORMDL3 PE=1 SV=1
680,TRUE,Q6IQ22	RAB12_HUMAN,209.69482,9,613.96686,1752.8492,8811.182,6653.911,1568.9099,82.13071,541.823,,4438.164,3666.6877,614.9849,536.0867,8,13,13,19,24,10,9,6,7,13,17,12,7,Carbamidomethylation,27248.398,Ras-related protein Rab-12 OS=Homo sapiens OX=9606 GN=RAB12 PE=1 SV=3
1359,TRUE,O00522	KRIT1_HUMAN,119.72482,2,,,,,80.91028,,,,,,,,2,,,,,3,,,,,,,,,84348.06,Krev interaction trapped protein 1 OS=Homo sapiens OX=9606 GN=KRIT1 PE=1 SV=2
69,TRUE,P29317	EPHA2_HUMAN,412.89444,34,306601.2,514027.62,320339.44,254935.08,387925.75,87234.305,145799.52,214038.77,266296.12,267361.5,176389.67,201561.9,31,126,161,113,102,157,85,82,93,88,87,97,96,Oxidation (M); Carbamidomethylation,108266.41,Ephrin type-A receptor 2 OS=Homo sapiens OX=9606 GN=EPHA2 PE=1 SV=2
465,TRUE,P18085	ARF4_HUMAN,248.1685,9,6728.8364,7885.2656,32663.38,20680.086,5022.363,983.7693,4334.1304,7529.275,32408.01,53583.688,8457.932,11986.72,6,32,27,36,33,20,11,20,27,34,33,28,30,Oxidation (M); Carbamidomethylation,20510.771,ADP-ribosylation factor 4 OS=Homo sapiens OX=9606 GN=ARF4 PE=1 SV=3
1203,TRUE,P48066	S6A11_HUMAN,109.61418,3,1423.4926,579.2052,,,1963.0355,159.04855,,550.9185,,,146.53151,423.89795,2,3,5,2,2,2,2,1,3,1,2,4,2,Carbamidomethylation,70605.83,Sodium- and chloride-dependent GABA transporter 3 OS=Homo sapiens OX=9606 GN=SLC6A11 PE=2 SV=1
46,TRUE,P10809	CH60_HUMAN,485.26898,49,57674.91,105116.67,830649.3,669895.25,642980.9,173049.33,307594.38,438822.06,1655429.8,1612345,123679.32,118159.12,49,52,57,189,170,173,108,147,133,347,375,68,60,Carbamidomethylation; Oxidation (M); Acetylation (N-term),61054.63,"60 kDa heat shock protein, mitochondrial OS=Homo sapiens OX=9606 GN=HSPD1 PE=1 SV=2"
786,TRUE,P53597	SUCA_HUMAN,196.27213,6,,4314.4927,3549.0093,1540.3018,5197.11,,1420.4485,2666.0337,4345.0566,2232.349,269.28473,1217.0894,6,4,2,8,6,10,8,4,8,6,3,5,8,Oxidation (M); Carbamidomethylation,36249.734,"Succinate--CoA ligase [ADP/GDP-forming] subunit alpha, mitochondrial OS=Homo sapiens OX=9606 GN=SUCLG1 PE=1 SV=4"
1293,TRUE,P0DP23	CALM1_HUMAN,98.00743,2,,1112.7196,4816.876,2600.8606,369.50385,,90.020096,179.46642,4401.0317,1289.1361,,482.9788,2,,4,3,2,1,,1,1,2,2,,1,,16837.582,Calmodulin-1 OS=Homo sapiens OX=9606 GN=CALM1 PE=1 SV=1
1260,TRUE,Q96CT7	CC124_HUMAN,124.23868,3,,,1646.6188,,,,,,1900.7778,2187.8723,,,3,,,2,,,,,,3,3,,,,25835.23,Coiled-coil domain-containing protein 124 OS=Homo sapiens OX=9606 GN=CCDC124 PE=1 SV=1
399,FALSE,Q5JWF2	GNAS1_HUMAN,280.3861,14,8715.438,11647.711,43617.043,29394.44,31835.19,4353.2886,8847.634,21750.15,36656.53,36561.52,6329.414,6655.3037,13,15,18,28,29,28,18,16,19,25,19,17,14,Carbamidomethylation; Oxidation (M),111024.516,Guanine nucleotide-binding protein G(s) subunit alpha isoforms XLas OS=Homo sapiens OX=9606 GN=GNAS PE=1 SV=2
311,TRUE,P42566	EPS15_HUMAN,286.27063,19,1060.6782,2669.5,7876.1997,5411.533,6994.796,239.79747,4979.6816,10759.746,9330.021,10177.626,2321.9402,1245.1855,19,10,5,17,8,17,5,13,21,19,14,6,6,Carbamidomethylation; Oxidation (M),98655.74,Epidermal growth factor receptor substrate 15 OS=Homo sapiens OX=9606 GN=EPS15 PE=1 SV=2
815,TRUE,Q9BZL6	KPCD2_HUMAN,206.73935,7,1043.0983,3859.099,7289.325,3179.6118,699.7137,,,1420.8391,7837.975,5745.3657,680.36163,1044.1477,7,6,7,14,7,2,1,3,3,10,12,4,9,Oxidation (M); Carbamidomethylation,96722.19,Serine/threonine-protein kinase D2 OS=Homo sapiens OX=9606 GN=PRKD2 PE=1 SV=3
310,TRUE,P07476	INVO_HUMAN,298.495,20,,994.0543,33165.023,23168.725,4875.891,444.49274,,,,,,,20,3,12,34,38,24,15,,,1,,,,Carbamidomethylation,68478.51,Involucrin OS=Homo sapiens OX=9606 GN=IVL PE=1 SV=2
152,TRUE,Q15262	PTPRK_HUMAN,342.97333,28,2616.6914,10407.986,8519.944,4042.6926,6537.4834,,8876.198,295695.5,27431.635,15145.209,13117.008,16931.273,27,15,24,11,13,23,5,28,35,29,24,28,38,Oxidation (M); Carbamidomethylation,162102.14,Receptor-type tyrosine-protein phosphatase kappa OS=Homo sapiens OX=9606 GN=PTPRK PE=1 SV=2
241,TRUE,Q15758	AAAT_HUMAN,295.81204,20,12604.457,20275.246,90804.25,77939.7,392380.7,130895.484,326188.25,440188.8,117035.07,104007.91,23447.844,26566.79,20,8,12,25,24,46,32,48,49,22,27,16,13,Carbamidomethylation; Oxidation (M); Acetylation (N-term),56598.336,Neutral amino acid transporter B(0) OS=Homo sapiens OX=9606 GN=SLC1A5 PE=1 SV=2
24,TRUE,Q9Y490	TLN1_HUMAN,521.506,88,1411.6881,4012.148,781894.3,668349.3,49465.258,1188.2064,1111746.9,132973.1,219443.53,251537.19,1270933.4,1020545.75,88,13,19,99,89,72,44,81,105,137,147,29,35,Oxidation (M); Carbamidomethylation,269767.06,Talin-1 OS=Homo sapiens OX=9606 GN=TLN1 PE=1 SV=3
976,TRUE,O15126	SCAM1_HUMAN,214.25653,5,,403.6504,2027.592,2275.9846,153.00876,,,318.9244,12945.502,12958.942,66.56444,516.66876,5,,4,8,5,1,,2,1,8,7,3,4,Oxidation (M),37920.426,Secretory carrier-associated membrane protein 1 OS=Homo sapiens OX=9606 GN=SCAMP1 PE=1 SV=2
740,TRUE,Q9H8V3	ECT2_HUMAN,206.40506,9,101.44571,,571.085,846.99316,65.95755,,,,1725.2847,1588.3137,168.31564,186.26598,9,2,1,4,5,1,,,1,7,5,3,2,Oxidation (M); Carbamidomethylation,103504.85,Protein ECT2 OS=Homo sapiens OX=9606 GN=ECT2 PE=1 SV=4
567,TRUE,Q9UI12	VATH_HUMAN,241.39595,10,338.83832,2150.6838,6801.1436,4178.1665,716.51355,,427.87167,865.9787,6089.9673,8864.913,265.1344,1155.4333,10,3,7,12,11,8,1,4,3,7,7,3,6,Oxidation (M),55883.066,V-type proton ATPase subunit H OS=Homo sapiens OX=9606 GN=ATP6V1H PE=1 SV=1
1116,FALSE,P22694	KAPCB_HUMAN,121.18526,3,,,778.45605,263.40436,,,,,519.4403,910.6324,,,3,,,3,4,,,,,1,2,,,,40622.69,cAMP-dependent protein kinase catalytic subunit beta OS=Homo sapiens OX=9606 GN=PRKACB PE=1 SV=2
910,TRUE,Q7L5Y9	MAEA_HUMAN,185.5581,6,312.91284,1611.5309,1157.7682,158.00908,141.25778,,,,2427.3628,1992.932,341.12427,707.3968,6,3,6,4,4,2,1,2,1,5,5,4,3,Oxidation (M),45287.285,E3 ubiquitin-protein transferase MAEA OS=Homo sapiens OX=9606 GN=MAEA PE=1 SV=1
106,TRUE,Q5JTH9	RRP12_HUMAN,398.15433,35,8290.459,19240.781,98020.36,71247.8,2495.1382,140.19571,4259.9365,8219.373,142493.06,123574.016,23083.896,28363.51,35,27,31,71,63,11,4,16,16,78,75,27,27,Carbamidomethylation; Oxidation (M),143702.1,RRP12-like protein OS=Homo sapiens OX=9606 GN=RRP12 PE=1 SV=2
1113,TRUE,P00749	UROK_HUMAN,148.6866,4,2118.221,5033.5327,559.969,453.069,3150.4941,,2706.991,11664.564,1108.309,,2755.2798,3892.748,4,4,3,2,1,4,,4,3,2,1,3,3,,48507.418,Urokinase-type plasminogen activator OS=Homo sapiens OX=9606 GN=PLAU PE=1 SV=2
655,TRUE,Q9UGI8	TES_HUMAN,194.82922,8,216.57297,623.07336,1964.4974,392.63293,551.6727,,,1204.3965,3928.2969,3884.6106,321.39758,,8,6,4,6,6,5,1,5,5,8,9,3,8,Carbamidomethylation; Oxidation (M),47996.402,Testin OS=Homo sapiens OX=9606 GN=TES PE=1 SV=1
410,TRUE,Q96SB4	SRPK1_HUMAN,271.65958,13,214.4671,2143.7363,10997.328,10283.245,2141.6045,,1003.2664,2309.2646,32322.041,33287.125,1604.3271,2852.0044,13,5,7,18,22,10,5,9,8,25,15,16,13,Carbamidomethylation; Oxidation (M),74324.77,SRSF protein kinase 1 OS=Homo sapiens OX=9606 GN=SRPK1 PE=1 SV=2
1031,TRUE,Q86UT6	NLRX1_HUMAN,153.31947,5,,,1090.9884,554.8568,1213.8854,,276.8413,1174.1161,494.08237,781.1968,,,5,1,,5,3,6,,4,2,4,4,1,,,107615.95,NLR family member X1 OS=Homo sapiens OX=9606 GN=NLRX1 PE=1 SV=1
416,TRUE,Q8N2K0	ABD12_HUMAN,274.54147,14,,3814.2776,15469.344,6000.346,2177.023,,,868.33276,6504.8765,9882.613,217.59369,170.07526,14,3,14,22,18,11,2,1,3,19,24,4,4,Oxidation (M),45096.758,Lysophosphatidylserine lipase ABHD12 OS=Homo sapiens OX=9606 GN=ABHD12 PE=1 SV=2
1204,TRUE,Q96BI3	APH1A_HUMAN,91.65653,3,,486.4834,,,,,,,,,,,3,,3,1,,,,,,,,1,,,28996.074,Gamma-secretase subunit APH-1A OS=Homo sapiens OX=9606 GN=APH1A PE=1 SV=1
860,TRUE,P15529	MCP_HUMAN,184.30603,6,4283.869,7743.0576,9141.92,3440.1567,14677.206,1077.3622,10941.246,18343.295,14285.03,13542.328,10482.352,17979.69,6,6,9,6,4,7,2,9,7,10,9,11,14,Carbamidomethylation; Oxidation (M),43747.305,Membrane cofactor protein OS=Homo sapiens OX=9606 GN=CD46 PE=1 SV=3
946,TRUE,Q9H4E7	DEFI6_HUMAN,156.6914,6,,,726.44464,,714.79694,,431.56293,270.4508,486.94708,,,,6,,,2,,3,1,6,3,1,,,,Oxidation (M),73910.33,Differentially expressed in FDCP 6 homolog OS=Homo sapiens OX=9606 GN=DEF6 PE=1 SV=1
181,TRUE,Q9P258	RCC2_HUMAN,361.95868,23,3085.1855,7128.777,105863.07,78285.75,14623.178,1719.6857,10883.898,24471.395,182492.6,185619.03,6200.063,9528.822,23,10,12,52,61,22,8,16,22,69,59,6,8,Carbamidomethylation; Oxidation (M),56084.516,Protein RCC2 OS=Homo sapiens OX=9606 GN=RCC2 PE=1 SV=2
194,TRUE,Q9UQB8	BAIP2_HUMAN,316.09653,22,27326.701,65886.234,100283.555,73475.9,99017.92,9758.609,16880.055,25676.875,69265.88,66075.016,12625.77,22786.352,22,39,36,47,37,51,30,24,33,34,32,26,26,Oxidation (M); Carbamidomethylation; Acetylation (N-term),60867.598,Brain-specific angiogenesis inhibitor 1-associated protein 2 OS=Homo sapiens OX=9606 GN=BAIAP2 PE=1 SV=1
370,TRUE,O95817	BAG3_HUMAN,296.2376,16,11134.719,17703.531,43352.688,31043.236,8062.0527,957.25366,3634.8728,4506.85,53793.992,54141.336,11569.223,14301.164,16,21,21,31,26,11,4,6,7,43,44,17,19,Carbamidomethylation; Oxidation (M),61594.684,BAG family molecular chaperone regulator 3 OS=Homo sapiens OX=9606 GN=BAG3 PE=1 SV=3
232,TRUE,Q04912	RON_HUMAN,329.10748,21,6450.9185,13408.772,12831.471,9342.234,19957.125,1607.8287,21485.727,34340.363,23802.207,26433.229,18728.156,21468.938,21,27,24,20,22,38,22,31,27,28,26,25,30,Oxidation (M); Carbamidomethylation,152241.44,Macrophage-stimulating protein receptor OS=Homo sapiens OX=9606 GN=MST1R PE=1 SV=3
1215,TRUE,Q96S97	MYADM_HUMAN,147.22095,2,,1202.4336,,,,,,397.52026,8937.111,9317.814,3141.8125,5153.584,2,2,3,3,1,,,,4,20,12,10,8,Oxidation (M),35273.59,Myeloid-associated differentiation marker OS=Homo sapiens OX=9606 GN=MYADM PE=1 SV=2
381,TRUE,P55010	IF5_HUMAN,265.24396,14,1017.67444,4840.598,33080.133,23991.016,26004.02,2719.0762,26902.299,35035.914,40890.168,39701.703,4440.457,3863.2805,14,8,5,19,20,16,9,21,19,29,25,10,9,Oxidation (M); Carbamidomethylation,49222.723,Eukaryotic translation initiation factor 5 OS=Homo sapiens OX=9606 GN=EIF5 PE=1 SV=2
104,TRUE,O00159	MYO1C_HUMAN,415.38107,39,13806.965,31540.197,192957.64,145107.69,136642.22,20103.094,48219.38,98934.24,96929.1,102500.72,8705.3545,14496.755,37,32,39,95,90,77,46,57,56,67,64,30,25,Carbamidomethylation; Oxidation (M),121681.67,Unconventional myosin-Ic OS=Homo sapiens OX=9606 GN=MYO1C PE=1 SV=4
1403,TRUE,Q9P2J2	TUTLA_HUMAN,57.76935,2,,172.49269,,,,,,,2829.9038,2580.8367,,,2,,1,,,,,,,1,1,,,,126580.35,Protein turtle homolog A OS=Homo sapiens OX=9606 GN=IGSF9 PE=1 SV=2
770,TRUE,Q9Y6M5	ZNT1_HUMAN,274.47833,8,5428.953,13022.908,18354.633,10056.294,54194.24,6773.2803,39965.812,76281.695,43762.94,47263.906,20409.865,10903.852,8,4,9,12,7,26,7,20,28,13,16,9,11,Carbamidomethylation,55299.81,Zinc transporter 1 OS=Homo sapiens OX=9606 GN=SLC30A1 PE=1 SV=3
233,TRUE,P19634	SL9A1_HUMAN,338.09653,17,9487.886,17331.014,93696.54,64941.707,171283.67,42315.484,84600.125,118863.555,129848.78,116046.3,11549.042,14038.755,17,15,15,39,41,55,25,41,42,33,41,10,13,Carbamidomethylation; Oxidation (M),90762.99,Sodium/hydrogen exchanger 1 OS=Homo sapiens OX=9606 GN=SLC9A1 PE=1 SV=2
1188,TRUE,O75608	LYPA1_HUMAN,155.03891,3,810.22644,1943.4498,,2010.856,6372.0605,1209.0326,3959.7397,814.62427,1051.378,7281.875,,2012.2063,3,1,1,1,1,5,1,3,3,3,4,,1,,24669.574,Acyl-protein thioesterase 1 OS=Homo sapiens OX=9606 GN=LYPLA1 PE=1 SV=1
1162,TRUE,Q9BXP2	S12A9_HUMAN,126.72025,3,,,1621.4473,,,,,,3272.5508,383.5354,,,3,,,3,1,,,,,2,2,,,Carbamidomethylation,96109.68,Solute carrier family 12 member 9 OS=Homo sapiens OX=9606 GN=SLC12A9 PE=1 SV=1
540,TRUE,P50148	GNAQ_HUMAN,230.37863,11,,,5611.658,4829.9146,691.05237,214.72032,,141.27216,5036.8594,3941.08,,152.3419,6,3,4,20,16,10,5,4,4,12,11,1,2,Carbamidomethylation; Oxidation (M),42142.086,Guanine nucleotide-binding protein G(q) subunit alpha OS=Homo sapiens OX=9606 GN=GNAQ PE=1 SV=4
10,TRUE,P10586	PTPRF_HUMAN,570.6785,112,359399.44,656420.06,488608.16,395966.12,525465.06,86905.68,676418.06,1060402.5,1088188.9,1164422.2,753899.3,876401.5,100,282,318,261,241,262,158,323,366,373,360,339,349,Carbamidomethylation; Oxidation (M),212878.88,Receptor-type tyrosine-protein phosphatase F OS=Homo sapiens OX=9606 GN=PTPRF PE=1 SV=2
1143,TRUE,Q08334	I10R2_HUMAN,132.40215,4,1114.7083,1135.2842,577.5724,226.71654,1356.513,,,1301.9254,,912.8887,785.2174,565.15326,4,4,6,1,3,7,1,1,6,2,1,4,3,Oxidation (M),36995.008,Interleukin-10 receptor subunit beta OS=Homo sapiens OX=9606 GN=IL10RB PE=1 SV=2
343,TRUE,Q8NBU5	ATAD1_HUMAN,285.50592,13,10108.987,24381.764,111644.56,77324.695,21135.887,2524.0818,7073.924,16372.624,66780.29,100060.49,6919.1543,9117.297,13,15,15,39,33,15,8,12,13,21,35,8,5,Carbamidomethylation; Oxidation (M),40744.03,ATPase family AAA domain-containing protein 1 OS=Homo sapiens OX=9606 GN=ATAD1 PE=1 SV=1
1393,TRUE,O75348	VATG1_HUMAN,92.49378,2,,,1255.2074,962.38904,,,,,2163.468,1478.561,,,2,,,2,2,,,,,2,3,,,,13757.514,V-type proton ATPase subunit G 1 OS=Homo sapiens OX=9606 GN=ATP6V1G1 PE=1 SV=3
383,TRUE,P61106	RAB14_HUMAN,332.8078,14,33546.45,58323.582,288995.9,226563.72,61378.504,9726.484,27093.787,44516.766,230024.72,199670.12,28755.303,40252.58,13,36,43,67,72,33,35,27,31,56,59,34,30,Oxidation (M); Carbamidomethylation,23896.941,Ras-related protein Rab-14 OS=Homo sapiens OX=9606 GN=RAB14 PE=1 SV=4
155,TRUE,Q12860	CNTN1_HUMAN,357.1855,27,19540.324,55501.773,18275.5,9316.33,46708.246,3729.5327,28117.92,59054.297,28129.363,29997.326,25101.393,37903.883,27,40,48,25,29,48,30,48,48,31,27,46,40,Oxidation (M),113320.41,Contactin-1 OS=Homo sapiens OX=9606 GN=CNTN1 PE=1 SV=1
456,TRUE,O15438	MRP3_HUMAN,244.38441,13,,,9506.971,6964.1763,9254.681,1032.217,6715.9976,804.1549,7750.037,6964.184,,,11,1,1,8,4,15,8,15,16,4,6,1,,Oxidation (M),169342.86,Canalicular multispecific organic anion transporter 2 OS=Homo sapiens OX=9606 GN=ABCC3 PE=1 SV=3
714,TRUE,O43159	RRP8_HUMAN,249.34921,9,1563.5835,1207.5361,14900.677,9505.229,,,,,19911.865,19646.996,1877.6823,1710.018,9,10,10,16,14,3,,4,2,13,15,6,9,Carbamidomethylation,50714.76,Ribosomal RNA-processing protein 8 OS=Homo sapiens OX=9606 GN=RRP8 PE=1 SV=2
165,TRUE,O43491	E41L2_HUMAN,317.79175,29,253.4338,1552.3969,10361.684,8355.262,6805.1064,122.40865,4498.2363,8305.372,30605.56,22343.21,700.0433,2188.3777,26,9,11,24,25,15,13,16,24,37,34,10,11,Carbamidomethylation; Oxidation (M); Acetylation (N-term),112588.08,Band 4.1-like protein 2 OS=Homo sapiens OX=9606 GN=EPB41L2 PE=1 SV=1
1116,TRUE,P17612	KAPCA_HUMAN,142.51018,4,,,2046.4741,978.2515,,,,,519.4403,910.6324,,,4,,,5,6,2,,,,3,3,,,,40589.664,cAMP-dependent protein kinase catalytic subunit alpha OS=Homo sapiens OX=9606 GN=PRKACA PE=1 SV=2
184,TRUE,P55011	S12A2_HUMAN,362.23218,25,,1750.5366,7490.4355,5763.529,67666.29,8683.456,48402.105,65786.23,13799.46,9754.766,978.30066,1120.0168,25,1,5,16,13,43,31,45,47,18,13,3,4,Oxidation (M); Acetylation (N-term),131447.11,Solute carrier family 12 member 2 OS=Homo sapiens OX=9606 GN=SLC12A2 PE=1 SV=1
1084,TRUE,O00255	MEN1_HUMAN,140.48218,4,,,462.98547,1159.19,,,,,531.87683,582.614,,,4,1,,2,2,,,1,1,3,2,,,,68023.38,Menin OS=Homo sapiens OX=9606 GN=MEN1 PE=1 SV=4
220,TRUE,P46459	NSF_HUMAN,306.00604,24,921.7896,3154.4768,71118.53,33663.93,13069.233,276.0319,2461.489,6238.912,30309.918,30186.582,2183.7783,3429.247,24,5,12,39,30,16,8,11,16,25,22,6,8,Carbamidomethylation; Oxidation (M),82594.34,Vesicle-fusing ATPase OS=Homo sapiens OX=9606 GN=NSF PE=1 SV=3
119,TRUE,P22735	TGM1_HUMAN,386.05054,30,55133.285,91768.43,298555.25,219930.44,122246.41,24812.846,4435.7036,5758.377,5909.4375,10204.345,2000.078,2306.8774,30,42,55,97,83,66,38,11,13,15,16,9,7,Oxidation (M),89786.7,Protein-glutamine gamma-glutamyltransferase K OS=Homo sapiens OX=9606 GN=TGM1 PE=1 SV=4
701,TRUE,Q9H2J7	S6A15_HUMAN,252.43811,9,513.4607,2464.6016,1543.9075,236.93735,9468.431,530.2875,9928.47,16879.248,10458.176,10350.67,4671.621,6193.5703,9,4,8,5,5,12,7,13,16,11,11,8,7,Carbamidomethylation; Oxidation (M),81836.25,Sodium-dependent neutral amino acid transporter B(0)AT2 OS=Homo sapiens OX=9606 GN=SLC6A15 PE=1 SV=1
387,TRUE,P32004	L1CAM_HUMAN,253.00107,15,1788.1271,5870.9985,925.563,,23138.576,,26569.693,3312.1858,10516.398,2416.043,20228.64,6311.079,15,9,11,3,4,11,4,12,16,7,7,8,16,Oxidation (M),140002.78,Neural cell adhesion molecule L1 OS=Homo sapiens OX=9606 GN=L1CAM PE=1 SV=2
38,TRUE,P08238	HS90B_HUMAN,483.13327,62,24659.873,61877.926,284806,270210.8,81499.625,20013.617,105544.81,189674.62,481257.9,473742.2,60429.1,89643.66,20,85,91,236,206,121,79,146,152,262,263,112,103,Carbamidomethylation; Oxidation (M),83264.195,Heat shock protein HSP 90-beta OS=Homo sapiens OX=9606 GN=HSP90AB1 PE=1 SV=4
1315,TRUE,A1A4S6	RHG10_HUMAN,88.158005,2,,415.91696,437.6379,230.818,,,,,,300.744,,,2,1,3,2,1,,,,,,1,,,,89374.61,Rho GTPase-activating protein 10 OS=Homo sapiens OX=9606 GN=ARHGAP10 PE=1 SV=1
896,TRUE,Q9H6X2	ANTR1_HUMAN,179.07787,5,,385.95123,318.10608,146.55258,502.55252,,886.0844,1967.6775,3139.7705,1989.3687,230.10687,875.51794,5,3,3,2,3,4,1,7,6,7,5,2,7,Oxidation (M),62788.973,Anthrax toxin receptor 1 OS=Homo sapiens OX=9606 GN=ANTXR1 PE=1 SV=2
925,TRUE,Q01469	FABP5_HUMAN,210.19243,5,,397.7065,50556.836,37448.63,958.52325,,,1082.6547,33183.492,35397.363,,,5,1,3,19,23,3,,1,4,10,12,1,,Acetylation (N-term); Carbamidomethylation; Oxidation (M),15164.425,Fatty acid-binding protein 5 OS=Homo sapiens OX=9606 GN=FABP5 PE=1 SV=3
1216,TRUE,Q16651	PRSS8_HUMAN,166.46121,3,,1528.1487,3459.0972,2521.825,2399.4783,240.76535,2440.0166,4449.787,2862.7808,3742.0225,939.4621,2061.1038,3,5,3,2,5,3,5,4,4,1,3,3,2,,36431.434,Prostasin OS=Homo sapiens OX=9606 GN=PRSS8 PE=1 SV=1
1355,TRUE,P36941	TNR3_HUMAN,106.50578,2,,,,,,,,,,664.12756,,,2,,,1,,1,,,,2,2,,,Carbamidomethylation,46709.07,Tumor necrosis factor receptor superfamily member 3 OS=Homo sapiens OX=9606 GN=LTBR PE=1 SV=1
1341,TRUE,P55085	PAR2_HUMAN,81.02211,2,,,,,830.06946,,145.03378,198.95413,695.8321,278.086,,,2,,,1,,2,,2,2,4,2,,,Oxidation (M),44126.336,Proteinase-activated receptor 2 OS=Homo sapiens OX=9606 GN=F2RL1 PE=1 SV=1
302,TRUE,Q8TEW0	PARD3_HUMAN,289.23026,19,572.2728,4106.4,4103.5874,2661.3557,8861.838,,4354.0947,9055.868,5614.8506,3623.1938,2946.4922,5431.3223,19,7,20,12,14,24,10,18,22,15,11,10,17,Oxidation (M),151423.11,Partitioning defective 3 homolog OS=Homo sapiens OX=9606 GN=PARD3 PE=1 SV=2
662,TRUE,Q15014	MO4L2_HUMAN,200.50124,8,175.40448,1761.8049,7139.6694,6425.083,545.5838,,,,6146.733,4042.2148,285.50876,464.95306,8,1,4,11,12,3,1,,,11,9,3,2,Oxidation (M); Carbamidomethylation,32307.85,Mortality factor 4-like protein 2 OS=Homo sapiens OX=9606 GN=MORF4L2 PE=1 SV=1
394,TRUE,O60353	FZD6_HUMAN,210.37347,13,4057.8994,5598.2344,5186.4243,5991.566,7138.4717,926.1458,3626.4897,4365.134,6622.9976,6657.8975,3822.5713,4204.624,13,5,7,5,8,7,4,4,3,8,12,5,8,Oxidation (M); Carbamidomethylation,79292.05,Frizzled-6 OS=Homo sapiens OX=9606 GN=FZD6 PE=1 SV=2
209,TRUE,P35613	BASI_HUMAN,334.3346,23,12587.0205,15722.869,273298.28,270872.06,658230.44,223042.84,583966.6,670668.8,356126.03,350443.34,23372.965,22900.666,23,11,10,47,44,81,37,73,102,68,71,14,17,Carbamidomethylation; Oxidation (M),42200.363,Basigin OS=Homo sapiens OX=9606 GN=BSG PE=1 SV=2
1364,TRUE,P19021	AMD_HUMAN,122.773224,2,,,169.30656,385.83356,,,,,277.37512,555.25385,,,2,1,,3,3,3,,,,1,3,,,,108332.055,Peptidyl-glycine alpha-amidating monooxygenase OS=Homo sapiens OX=9606 GN=PAM PE=1 SV=2
1069,TRUE,Q8IZ07	AN13A_HUMAN,140.66202,4,,,,,549.5245,,,174.80759,610.63403,,,,4,,,,,1,1,2,3,3,,,,,67619.06,Ankyrin repeat domain-containing protein 13A OS=Homo sapiens OX=9606 GN=ANKRD13A PE=1 SV=3
318,TRUE,Q96JB2	COG3_HUMAN,275.27078,19,133.79054,137.09308,4049.2393,3764.2913,,,,,11155.303,8112.1245,,746.55383,19,2,3,16,12,3,1,,,21,18,2,5,Acetylation (N-term); Carbamidomethylation,94095.91,Conserved oligomeric Golgi complex subunit 3 OS=Homo sapiens OX=9606 GN=COG3 PE=1 SV=3
960,TRUE,Q9NS86	LANC2_HUMAN,183.97464,5,87.829506,1009.2329,645.4393,587.7863,144.15588,,433.58105,256.98492,1036.1167,2601.5093,,361.91656,5,2,1,3,3,4,3,3,2,2,6,,1,Oxidation (M); Carbamidomethylation,50854.305,LanC-like protein 2 OS=Homo sapiens OX=9606 GN=LANCL2 PE=1 SV=1
1327,TRUE,O00562	PITM1_HUMAN,96.45621,2,,,,,,,,,,,,,2,,,2,,,,,,,,,,,134847.62,Membrane-associated phosphatidylinositol transfer protein 1 OS=Homo sapiens OX=9606 GN=PITPNM1 PE=1 SV=4
504,TRUE,Q08209	PP2BA_HUMAN,211.367,11,,,,,770.7719,,210.42413,1339.1945,3926.693,2677.101,,,6,,5,10,4,10,1,13,16,25,17,3,4,Oxidation (M),58687.84,Serine/threonine-protein phosphatase 2B catalytic subunit alpha isoform OS=Homo sapiens OX=9606 GN=PPP3CA PE=1 SV=1
534,TRUE,Q9UQC9	CLCA2_HUMAN,272.8026,11,2978.1904,5884.8604,6573.295,4578.4414,9843.084,856.62683,,,,,,,11,13,12,10,10,12,14,,,,,,,Oxidation (M),103940.836,Calcium-activated chloride channel regulator 2 OS=Homo sapiens OX=9606 GN=CLCA2 PE=1 SV=2
874,TRUE,Q9Y3L3	3BP1_HUMAN,169.53758,6,,,1362.3502,,134.10606,,,437.14148,1040.2356,1955.7167,,,6,,,6,2,1,,,1,6,3,,,Oxidation (M); Carbamidomethylation,75713.22,SH3 domain-binding protein 1 OS=Homo sapiens OX=9606 GN=SH3BP1 PE=1 SV=3
987,TRUE,Q9P0J7	KCMF1_HUMAN,168.61612,3,,766.38074,1376.3778,189.93678,,,,464.5979,1626.209,3042.394,,,3,2,5,5,4,1,,1,4,4,5,2,,Oxidation (M),41945.367,E3 ubiquitin-protein ligase KCMF1 OS=Homo sapiens OX=9606 GN=KCMF1 PE=1 SV=2
270,TRUE,Q9HCK8	CHD8_HUMAN,300.70627,21,,1008.58984,6686.374,2262.3743,,,,,5652.2646,5956.3765,,,21,3,12,22,14,2,,,,13,13,1,4,Carbamidomethylation; Oxidation (M),290519.06,Chromodomain-helicase-DNA-binding protein 8 OS=Homo sapiens OX=9606 GN=CHD8 PE=1 SV=5
761,TRUE,P30825	SL7A1_HUMAN,185.07716,6,5344.962,10309.422,31370.377,18157.494,89361.76,19902.197,43258.164,62872.625,26815.408,32420.004,6024.5293,5271.062,6,5,5,11,6,17,17,11,13,15,11,10,7,Carbamidomethylation; Oxidation (M),67638.37,High affinity cationic amino acid transporter 1 OS=Homo sapiens OX=9606 GN=SLC7A1 PE=1 SV=1
666,TRUE,P41743	KPCI_HUMAN,234.9527,8,1201.2949,218.59808,4159.9185,2606.5278,1775.6733,284.31165,3064.2837,4473.951,4156.434,2236.7761,1191.2842,1664.0818,8,2,3,3,7,5,6,5,6,6,6,4,1,Carbamidomethylation; Oxidation (M),68262.36,Protein kinase C iota type OS=Homo sapiens OX=9606 GN=PRKCI PE=1 SV=2
530,TRUE,Q8WUX1	S38A5_HUMAN,189.60619,7,,,,,,,22811.77,65298.098,29788.07,33742.01,35890.75,51416.246,7,,,,,,,16,24,16,17,14,19,Acetylation (N-term); Oxidation (M),51457.426,Sodium-coupled neutral amino acid transporter 5 OS=Homo sapiens OX=9606 GN=SLC38A5 PE=1 SV=1
791,TRUE,P51159	RB27A_HUMAN,203.72002,8,898.10657,2386.051,7306.479,3321.2278,904.17114,,,274.89548,2751.0781,2627.6748,560.91675,635.33795,6,12,12,22,22,11,8,4,8,15,17,10,6,,24868.068,Ras-related protein Rab-27A OS=Homo sapiens OX=9606 GN=RAB27A PE=1 SV=3
417,TRUE,Q8NHP6	MSPD2_HUMAN,238.35612,12,2812.2441,3344.4812,15078.443,10820.919,1681.0193,326.02994,,,3244.1719,2878.323,,1487.0732,12,7,6,17,20,4,2,1,,8,7,1,1,Oxidation (M); Carbamidomethylation,59746.176,Motile sperm domain-containing protein 2 OS=Homo sapiens OX=9606 GN=MOSPD2 PE=1 SV=1
528,TRUE,Q9BTX1	NDC1_HUMAN,260.39404,10,600.8988,693.88214,8622.927,6300.05,,,334.2554,,13827.439,19531.512,1316.2091,1947.8977,10,2,5,14,15,3,,2,,17,18,9,10,Carbamidomethylation; Oxidation (M),76304.805,Nucleoporin NDC1 OS=Homo sapiens OX=9606 GN=NDC1 PE=1 SV=2
451,TRUE,P20936	RASA1_HUMAN,265.7798,12,344.14154,374.24774,4118.303,3390.665,2340.5786,,1620.608,3213.413,8131.3184,7816.5117,574.61865,984.5219,12,3,2,10,7,10,3,6,17,15,15,4,5,Carbamidomethylation; Oxidation (M),116403.234,Ras GTPase-activating protein 1 OS=Homo sapiens OX=9606 GN=RASA1 PE=1 SV=1
71,FALSE,A8MZ36	EVPLL_HUMAN,132.28227,3,,98.361404,2448.6724,1244.4504,,,,,803.88824,384.1198,,,3,,3,5,4,1,1,,2,5,2,,,,33952.875,Envoplakin-like protein OS=Homo sapiens OX=9606 GN=EVPLL PE=2 SV=1
1015,TRUE,Q96D71	REPS1_HUMAN,155.64645,5,,,1133.1436,969.50586,853.8145,,316.49933,228.19107,636.23883,902.83875,,,5,,,6,2,3,2,2,1,4,4,,,,86662.14,RalBP1-associated Eps domain-containing protein 1 OS=Homo sapiens OX=9606 GN=REPS1 PE=1 SV=3
1030,TRUE,Q9NRU3	CNNM1_HUMAN,191.60756,5,,,120.6775,,,,,484.02594,,,210.61465,182.4877,2,4,3,6,5,6,4,8,6,3,4,6,5,,104350.625,Metal transporter CNNM1 OS=Homo sapiens OX=9606 GN=CNNM1 PE=1 SV=3
1253,TRUE,Q92574	TSC1_HUMAN,129.1947,3,,,128.90268,,,,,,2764.9358,2342.8306,113.17813,216.50134,3,1,3,2,2,,,,2,3,3,2,1,Acetylation (N-term); Oxidation (M),129766.58,Hamartin OS=Homo sapiens OX=9606 GN=TSC1 PE=1 SV=2
1039,TRUE,O60292	SI1L3_HUMAN,141.93701,5,,,382.88843,144.3136,,,,429.12448,1319.9619,1249.1445,73.15314,812.55597,5,2,,1,1,,,,3,3,4,2,3,,194609.89,Signal-induced proliferation-associated 1-like protein 3 OS=Homo sapiens OX=9606 GN=SIPA1L3 PE=1 SV=3
555,TRUE,Q92542	NICA_HUMAN,245.58531,11,2708.5452,1689.4125,5770.16,3685.596,23218.674,9795.473,14197.785,21693.34,4320.5425,6955.8564,,2125.5522,11,6,6,9,12,26,9,16,16,9,11,1,4,Oxidation (M),78410.92,Nicastrin OS=Homo sapiens OX=9606 GN=NCSTN PE=1 SV=2
1053,TRUE,Q92536	YLAT2_HUMAN,161.2804,4,,,1222.6293,,,,259.9402,1459.095,2871.222,4610.275,,,4,,1,5,5,13,2,4,5,3,3,1,2,Oxidation (M); Acetylation (N-term); Carbamidomethylation,56827.516,Y+L amino acid transporter 2 OS=Homo sapiens OX=9606 GN=SLC7A6 PE=1 SV=3
279,TRUE,Q6NSJ5	LRC8E_HUMAN,326.83517,20,6206.4097,14411.57,15376.666,8725.291,26071.72,1766.9775,10018.07,21179.258,14190.617,9994.274,4090.7705,9572.661,18,21,18,19,22,25,16,22,23,18,17,20,16,Oxidation (M); Carbamidomethylation,90247.19,Volume-regulated anion channel subunit LRRC8E OS=Homo sapiens OX=9606 GN=LRRC8E PE=1 SV=2
924,TRUE,O14641	DVL2_HUMAN,149.87921,5,,465.0573,,204.97708,95.1942,,,116.62805,933.5217,889.85425,142.98973,,4,1,4,4,3,2,,3,2,4,6,1,1,Oxidation (M),78947.94,Segment polarity protein dishevelled homolog DVL-2 OS=Homo sapiens OX=9606 GN=DVL2 PE=1 SV=1
967,TRUE,Q6ZSS7	MFSD6_HUMAN,119.23784,5,,,918.9124,488.79425,2547.9697,,117.82597,258.09937,453.11194,319.5194,,,5,,,3,4,4,1,1,1,1,1,,,Carbamidomethylation,88087.94,Major facilitator superfamily domain-containing protein 6 OS=Homo sapiens OX=9606 GN=MFSD6 PE=1 SV=2
964,TRUE,Q13442	HAP28_HUMAN,160.28589,5,,,8710.487,6800.9385,,,,,5159.201,9254.227,,,5,,,5,5,1,,2,,5,4,,,,20630.008,28 kDa heat- and acid-stable phosphoprotein OS=Homo sapiens OX=9606 GN=PDAP1 PE=1 SV=1
1245,TRUE,P32455	GBP1_HUMAN,132.6787,3,,,1219.4731,764.0776,,,,,,,,,3,,,4,3,,,,,,,,,,67930.73,Guanylate-binding protein 1 OS=Homo sapiens OX=9606 GN=GBP1 PE=1 SV=2
707,TRUE,Q9ULG1	INO80_HUMAN,230.71657,9,,,1995.409,709.1576,,,,,3601.2788,4080.9438,120.97074,149.9414,9,4,4,7,8,,,,1,6,11,2,2,,176753.33,Chromatin-remodeling ATPase INO80 OS=Homo sapiens OX=9606 GN=INO80 PE=1 SV=2
1360,TRUE,Q96EV8	DTBP1_HUMAN,84.073555,2,,,755.7256,544.1957,107.57054,,,,,,,,2,,,1,1,1,,,,,1,,,,39492.973,Dysbindin OS=Homo sapiens OX=9606 GN=DTNBP1 PE=1 SV=1
949,TRUE,Q9UN70	PCDGK_HUMAN,136.63104,6,,125.82586,,95.8146,117.623566,,,528.604,,,,,5,,3,,1,1,,1,5,,1,1,,,101077.414,Protocadherin gamma-C3 OS=Homo sapiens OX=9606 GN=PCDHGC3 PE=1 SV=1
1141,TRUE,O14494	PLPP1_HUMAN,159.28853,4,,,2013.1018,1008.9425,3818.7744,400.3917,1999.7377,2381.2588,2059.1543,2354.8716,,,4,1,,6,4,7,4,3,3,5,4,1,,Carbamidomethylation,32156.074,Phospholipid phosphatase 1 OS=Homo sapiens OX=9606 GN=PLPP1 PE=1 SV=1
1251,TRUE,P57105	SYJ2B_HUMAN,144.37018,3,,,7690.359,5711.833,,,,,4718.6606,4286.8584,,,3,,,7,4,,,,,3,4,,,,15928.054,Synaptojanin-2-binding protein OS=Homo sapiens OX=9606 GN=SYNJ2BP PE=1 SV=2
820,TRUE,Q7Z4W1	DCXR_HUMAN,168.71785,6,,360.09778,565.62854,387.37695,1543.7046,129.61203,507.43213,2105.1143,,1868.1339,,,6,1,3,4,3,2,2,2,5,3,6,1,,Carbamidomethylation; Oxidation (M),25913.053,L-xylulose reductase OS=Homo sapiens OX=9606 GN=DCXR PE=1 SV=2
1185,TRUE,P19256	LFA3_HUMAN,116.0184,3,19154.51,29358.648,19373.29,14947.251,34323.668,10038.023,21596.504,27612.838,19858.799,20328.805,23391.545,23608.754,3,5,4,2,2,6,3,6,6,3,5,5,6,,28147.377,Lymphocyte function-associated antigen 3 OS=Homo sapiens OX=9606 GN=CD58 PE=1 SV=1
1187,TRUE,Q14451	GRB7_HUMAN,109.311935,3,,,,,,,,,,,,,3,1,1,1,1,,,,,1,,,,Oxidation (M),59681.08,Growth factor receptor-bound protein 7 OS=Homo sapiens OX=9606 GN=GRB7 PE=1 SV=2
1083,TRUE,P05120	PAI2_HUMAN,138.0207,4,,,407.5171,,138.41586,,,225.65495,344.13773,,,,4,1,,3,1,2,,,1,2,1,1,,,46596.2,Plasminogen activator inhibitor 2 OS=Homo sapiens OX=9606 GN=SERPINB2 PE=1 SV=2
1426,TRUE,P17152	TMM11_HUMAN,108.77886,2,,322.56717,4735.536,2874.4028,638.182,,,266.2755,1044.7217,728.40717,,,2,,1,4,5,3,2,,2,4,2,,,,21540.771,"Transmembrane protein 11, mitochondrial OS=Homo sapiens OX=9606 GN=TMEM11 PE=1 SV=1"
653,TRUE,Q96A49	SYAP1_HUMAN,237.44623,9,,810.0884,2107.7266,1404.9741,516.07623,,,,5496.0474,4448.0205,628.4972,1059.3148,9,,2,11,6,1,1,1,1,15,18,2,4,Oxidation (M),39933.418,Synapse-associated protein 1 OS=Homo sapiens OX=9606 GN=SYAP1 PE=1 SV=1
1147,TRUE,Q9BZF3	OSBL6_HUMAN,130.94043,4,,,,466.3125,,,,,769.251,1186.147,,,3,,1,2,1,1,,,,3,3,,,Carbamidomethylation,106305.99,Oxysterol-binding protein-related protein 6 OS=Homo sapiens OX=9606 GN=OSBPL6 PE=1 SV=1
752,TRUE,Q8TAG9	EXOC6_HUMAN,204.1687,8,634.6995,1894.1779,5198.262,2509.3853,1488.9277,,373.5237,1059.1924,1375.4025,1840.0096,399.68497,612.38477,8,4,3,8,7,4,1,2,3,6,6,2,1,Acetylation (N-term); Carbamidomethylation,93722.32,Exocyst complex component 6 OS=Homo sapiens OX=9606 GN=EXOC6 PE=1 SV=3
617,TRUE,P18827	SDC1_HUMAN,294.8687,11,1885.9384,1430.0159,78292.43,56201.582,154089.27,43134.816,82377.664,111400.09,81374.38,89605.7,2155.0027,789.026,11,7,4,22,16,28,16,25,32,24,25,2,4,,32461.623,Syndecan-1 OS=Homo sapiens OX=9606 GN=SDC1 PE=1 SV=3
323,TRUE,P16422	EPCAM_HUMAN,313.49573,14,7493.0776,17481.973,107258.23,77090.03,87343.55,17590.797,120179.68,215767.62,276492.56,283167.25,22583.508,26789.137,14,7,10,24,23,22,12,28,35,37,38,18,12,Carbamidomethylation; Oxidation (M),34932.277,Epithelial cell adhesion molecule OS=Homo sapiens OX=9606 GN=EPCAM PE=1 SV=2
885,TRUE,Q9H1P3	OSBL2_HUMAN,142.04955,6,,,1783.8164,1181.2769,399.44983,,,327.74405,1869.0734,1804.8665,,,6,,,3,5,5,1,1,1,3,5,,,Oxidation (M),55201.27,Oxysterol-binding protein-related protein 2 OS=Homo sapiens OX=9606 GN=OSBPL2 PE=1 SV=1
1324,TRUE,Q9BSL1	UBAC1_HUMAN,97.11304,2,,,1017.11914,608.84814,306.32788,,390.63934,1022.19525,1627.582,1723.7211,91.56253,,2,,,1,2,1,2,1,1,1,3,2,,,45338.434,Ubiquitin-associated domain-containing protein 1 OS=Homo sapiens OX=9606 GN=UBAC1 PE=1 SV=1
1017,TRUE,Q8WWI1	LMO7_HUMAN,131.19205,5,,,,,,,,,,,,,5,1,3,4,3,1,,,1,,,,,Oxidation (M),192695.64,LIM domain only protein 7 OS=Homo sapiens OX=9606 GN=LMO7 PE=1 SV=3
869,TRUE,Q9HAV0	GBB4_HUMAN,195.17711,7,,,262.13,112.43811,,,,,,,,,2,4,6,14,11,7,5,7,11,12,9,4,6,Carbamidomethylation; Acetylation (N-term),37567.18,Guanine nucleotide-binding protein subunit beta-4 OS=Homo sapiens OX=9606 GN=GNB4 PE=1 SV=3
309,TRUE,Q01650	LAT1_HUMAN,361.2234,19,85287.87,112844.48,292959.9,235832.02,428208.94,124687.89,335005.88,405383.84,417630.78,379631.72,132722.31,186366.44,19,24,45,59,47,55,23,62,86,86,85,40,50,Carbamidomethylation; Oxidation (M),55010.24,Large neutral amino acids transporter small subunit 1 OS=Homo sapiens OX=9606 GN=SLC7A5 PE=1 SV=2
763,TRUE,P63000	RAC1_HUMAN,196.14027,6,252.13766,1815.1248,7047.9424,5609.7637,3279.6145,293.3795,3173.7327,3081.119,3764.6658,3769.2058,,,2,4,4,8,7,8,2,8,5,5,5,3,1,Carbamidomethylation; Oxidation (M),21450.102,Ras-related C3 botulinum toxin substrate 1 OS=Homo sapiens OX=9606 GN=RAC1 PE=1 SV=1
577,TRUE,P67775	PP2AA_HUMAN,265.85605,9,831.0227,,14464.361,11057.805,8345.075,1069.2974,7935.092,4361.7183,10916.937,9625.584,,891.2752,7,2,2,17,21,10,3,7,8,22,21,2,3,Oxidation (M); Carbamidomethylation,35594.19,Serine/threonine-protein phosphatase 2A catalytic subunit alpha isoform OS=Homo sapiens OX=9606 GN=PPP2CA PE=1 SV=1
134,FALSE,Q6U841	S4A10_HUMAN,146.12617,3,156.3378,547.0085,5417.2905,4350.179,7033.707,1140.8076,10556.726,13885.406,16004.908,16162.947,401.6277,669.1339,3,2,1,3,4,6,3,5,6,8,7,1,1,Oxidation (M),125946.266,Sodium-driven chloride bicarbonate exchanger OS=Homo sapiens OX=9606 GN=SLC4A10 PE=1 SV=1
668,TRUE,Q9ULC3	RAB23_HUMAN,225.79065,9,,180.43033,6813.4893,3541.5354,7519.9307,,2511.2686,1226.9661,5725.946,4328.1543,,,9,,1,11,8,10,5,7,6,5,10,,,Carbamidomethylation; Oxidation (M),26659.24,Ras-related protein Rab-23 OS=Homo sapiens OX=9606 GN=RAB23 PE=1 SV=1
303,TRUE,P54709	AT1B3_HUMAN,323.33392,17,94491.09,138963.88,525693.5,397275.28,830419.8,256770.9,632246,876327.8,631433.75,633020.75,130385.28,157067.56,17,33,40,63,59,92,53,78,87,71,58,41,43,Oxidation (M),31512.578,Sodium/potassium-transporting ATPase subunit beta-3 OS=Homo sapiens OX=9606 GN=ATP1B3 PE=1 SV=1
1002,TRUE,Q8N5A5	ZGPAT_HUMAN,151.94862,5,,398.43073,1741.7625,1039.4678,,,,,1192.5422,,,,5,,3,7,5,1,,,,7,2,1,,Carbamidomethylation,57358.676,Zinc finger CCCH-type with G patch domain-containing protein OS=Homo sapiens OX=9606 GN=ZGPAT PE=1 SV=3
1214,TRUE,P18084	ITB5_HUMAN,152.44745,3,1710.7451,3828.7827,2341.0781,1922.8767,4007.1848,461.04895,3520.6316,6472.5977,5428.384,5659.3247,3011.7434,2941.116,3,2,4,2,1,4,4,4,2,3,3,2,3,,88054.21,Integrin beta-5 OS=Homo sapiens OX=9606 GN=ITGB5 PE=1 SV=1
731,FALSE,O14910	LIN7A_HUMAN,125.63983,2,,262.4654,2322.8582,607.3878,2238.5266,,2046.2461,4521.593,4679.947,1953.783,487.8542,,2,1,3,2,4,2,1,3,4,5,5,2,3,,25996.723,Protein lin-7 homolog A OS=Homo sapiens OX=9606 GN=LIN7A PE=1 SV=2
1076,TRUE,Q9Y217	MTMR6_HUMAN,102.45684,4,,,285.58057,182.13138,,,,450.9284,913.68365,731.20135,,,4,,,1,1,,,,2,4,4,,,,71967.945,Myotubularin-related protein 6 OS=Homo sapiens OX=9606 GN=MTMR6 PE=1 SV=3
247,TRUE,Q96EY7	PTCD3_HUMAN,321.98654,18,212.55898,2116.4316,20771.422,15759.479,39025.246,4747.365,8634.649,22407.44,28012.273,33908.32,1718.0847,2826.06,18,3,8,24,28,25,17,17,19,26,22,7,8,Carbamidomethylation; Oxidation (M),78549.69,"Pentatricopeptide repeat domain-containing protein 3, mitochondrial OS=Homo sapiens OX=9606 GN=PTCD3 PE=1 SV=3"
428,TRUE,P27105	STOM_HUMAN,313.9418,11,7452.9414,21295.21,146592.56,103067.625,153559.02,24261.45,87355.36,158640.78,314066.4,330881.94,18287.299,24276.242,11,19,19,43,49,47,33,38,51,60,57,21,17,Oxidation (M); Carbamidomethylation,31730.791,Stomatin OS=Homo sapiens OX=9606 GN=STOM PE=1 SV=3
882,TRUE,Q6P9F7	LRC8B_HUMAN,200.47337,6,,1237.0448,958.3438,151.8247,590.99164,,331.9313,1281.9031,1627.719,1269.7765,599.39484,895.84875,5,2,3,7,5,5,1,5,4,5,5,2,4,Carbamidomethylation,92389.79,Volume-regulated anion channel subunit LRRC8B OS=Homo sapiens OX=9606 GN=LRRC8B PE=1 SV=2
646,TRUE,Q86YZ3	HORN_HUMAN,208.14558,10,,258.31293,,,,,711.7939,1675.8376,,,,,10,1,6,,,1,,1,12,1,,,2,,282389.9,Hornerin OS=Homo sapiens OX=9606 GN=HRNR PE=1 SV=2
290,TRUE,P00505	AATM_HUMAN,338.2317,17,,,74076.68,69890.13,117077.86,21901.975,28731.982,37068.062,80999.21,61147.234,,,17,,,38,27,39,17,17,23,31,30,,,Oxidation (M); Carbamidomethylation,47517.65,"Aspartate aminotransferase, mitochondrial OS=Homo sapiens OX=9606 GN=GOT2 PE=1 SV=3"
82,TRUE,P17301	ITA2_HUMAN,420.5835,38,119009.45,191427.4,85735.805,80513.37,162944.31,26611.781,182817.25,255353.73,218149.14,237293.45,223681.69,244100.7,38,91,90,58,60,81,48,87,100,89,85,94,107,Carbamidomethylation; Oxidation (M),129295.44,Integrin alpha-2 OS=Homo sapiens OX=9606 GN=ITGA2 PE=1 SV=1
1134,TRUE,Q9Y6I3	EPN1_HUMAN,145.60825,4,,,379.6704,,,,,,,581.2564,,,3,2,1,5,2,3,3,1,1,1,3,1,1,,60293.27,Epsin-1 OS=Homo sapiens OX=9606 GN=EPN1 PE=1 SV=2
1117,TRUE,Q9NZ53	PDXL2_HUMAN,170.55417,4,,179.863,175.90424,83.16463,,,436.57144,2531.478,2549.5693,1334.0978,,,4,,2,2,2,2,,3,9,5,4,2,3,Acetylation (N-term),65075.816,Podocalyxin-like protein 2 OS=Homo sapiens OX=9606 GN=PODXL2 PE=1 SV=1
525,TRUE,Q9NQX3	GEPH_HUMAN,241.4433,11,,240.98645,1663.0159,194.48524,228.41998,,92.423035,828.9477,7298.101,5214.3784,605.31586,363.55237,11,1,2,7,6,3,,4,7,9,8,5,3,Acetylation (N-term); Oxidation (M); Carbamidomethylation,79748.39,Gephyrin OS=Homo sapiens OX=9606 GN=GPHN PE=1 SV=1
1177,TRUE,Q96GX1	TECT2_HUMAN,101.79804,3,,,,,,,195.03925,261.57837,,276.77893,,,3,,,,,,,2,2,,1,,,,76870.73,Tectonic-2 OS=Homo sapiens OX=9606 GN=TCTN2 PE=2 SV=1
111,FALSE,B0I1T2	MYO1G_HUMAN,111.23411,3,,,601.68005,537.5737,2227.6611,,532.9584,1130.5101,,,,,2,,,5,4,1,2,5,4,2,1,,1,Carbamidomethylation; Oxidation (M),116442.07,Unconventional myosin-Ig OS=Homo sapiens OX=9606 GN=MYO1G PE=1 SV=2
107,TRUE,P08670	VIME_HUMAN,366.51724,36,,,,,,,15520.503,27907.148,126403.836,116740.82,16218.447,20913.09,32,1,3,,,,2,38,31,72,73,43,34,Oxidation (M); Carbamidomethylation,53651.676,Vimentin OS=Homo sapiens OX=9606 GN=VIM PE=1 SV=4
764,TRUE,Q96QD8	S38A2_HUMAN,284.6665,8,5302.121,11494.211,29363.105,22639.676,71509.53,13439.739,37143.227,46093.125,36263.594,40614.36,6417.252,7614.8643,8,4,5,11,10,20,9,16,19,11,13,3,4,Oxidation (M); Carbamidomethylation,56026.004,Sodium-coupled neutral amino acid transporter 2 OS=Homo sapiens OX=9606 GN=SLC38A2 PE=1 SV=2
1012,TRUE,O60462	NRP2_HUMAN,176.46175,5,,,,,124.39782,,,716.42834,486.94507,139.225,1633.3817,2487.217,5,2,2,,,6,2,1,6,2,1,3,1,Oxidation (M),104830.65,Neuropilin-2 OS=Homo sapiens OX=9606 GN=NRP2 PE=1 SV=3
520,TRUE,P49841	GSK3B_HUMAN,208.18602,12,185.8458,603.13184,2386.1145,4862.3364,3483.8638,,1267.0774,2731.473,5508.063,6022.4,338.2603,478.53662,12,3,7,14,12,12,1,7,10,14,15,1,3,Oxidation (M); Carbamidomethylation,46744.336,Glycogen synthase kinase-3 beta OS=Homo sapiens OX=9606 GN=GSK3B PE=1 SV=2
904,TRUE,Q9UBH6	XPR1_HUMAN,178.85583,6,,,610.6045,300.44446,,,,181.76897,9561.686,9382.066,,,6,,,6,3,,,,2,5,5,,,Carbamidomethylation,81535.17,Xenotropic and polytropic retrovirus receptor 1 OS=Homo sapiens OX=9606 GN=XPR1 PE=1 SV=1
1149,TRUE,P09496	CLCA_HUMAN,156.72264,4,,,1892.0448,1776.2827,,,,,8212.396,11177.928,160.22917,,4,,,5,4,,,1,1,7,9,2,1,,27076.69,Clathrin light chain A OS=Homo sapiens OX=9606 GN=CLTA PE=1 SV=1
514,TRUE,Q9H2K8	TAOK3_HUMAN,216.75432,13,800.0456,1749.7491,287.92163,456.3859,4136.087,296.8842,2300.5151,7005.428,69805.72,5223.7554,525.1647,1045.487,13,3,6,7,5,13,1,11,13,10,9,3,4,Oxidation (M),105405.81,Serine/threonine-protein kinase TAO3 OS=Homo sapiens OX=9606 GN=TAOK3 PE=1 SV=2
11,TRUE,P49327	FAS_HUMAN,577.6507,121,74529.32,176439.84,1130824.8,839864.25,332607.62,37924.05,302653.16,502912,1377407.9,1481747.9,159089.92,200649.17,121,105,147,325,290,166,96,182,199,345,358,120,127,Carbamidomethylation; Oxidation (M); Acetylation (N-term),273426.6,Fatty acid synthase OS=Homo sapiens OX=9606 GN=FASN PE=1 SV=3
240,TRUE,Q15019	SEPT2_HUMAN,315.7898,18,4478.3027,9857.938,79906.44,53528.83,13702.979,2027.1803,10676.232,19447.34,91546.336,95706.69,7431.349,12181.352,18,5,7,42,31,9,9,10,13,49,42,5,7,Oxidation (M); Carbamidomethylation,41487.47,Septin-2 OS=Homo sapiens OX=9606 GN=SEPTIN2 PE=1 SV=1
724,TRUE,Q86UK0	ABCAC_HUMAN,179.67575,9,,31825.732,1077.864,663.6701,1467.6431,,,,,,,,9,,6,3,3,7,1,,,,1,,,Oxidation (M); Acetylation (N-term),293236.6,ATP-binding cassette sub-family A member 12 OS=Homo sapiens OX=9606 GN=ABCA12 PE=1 SV=3
385,TRUE,P21912	SDHB_HUMAN,249.7505,13,,,19797.877,14831.885,16909.871,1597.2914,4576.211,11113.09,41534.527,92213.98,,,13,,,18,16,14,9,7,10,23,22,,1,Oxidation (M); Carbamidomethylation,31629.703,"Succinate dehydrogenase [ubiquinone] iron-sulfur subunit, mitochondrial OS=Homo sapiens OX=9606 GN=SDHB PE=1 SV=3"
396,TRUE,Q07666	KHDR1_HUMAN,285.12677,12,26214.305,43016.164,163509.62,116727.2,20915.607,,11995.989,19222.434,168875.73,169615.8,35233.84,33745.92,12,21,27,33,31,16,8,11,22,31,34,29,20,Oxidation (M),48227.332,"KH domain-containing, RNA-binding, signal transduction-associated protein 1 OS=Homo sapiens OX=9606 GN=KHDRBS1 PE=1 SV=1"
368,TRUE,Q96P48	ARAP1_HUMAN,267.43796,16,982.8164,1924.8486,10766.117,3438.4517,2019.8586,,1576.188,1026.9641,6431.492,3857.228,965.11865,2925.1077,16,4,10,18,16,10,5,4,7,13,12,5,7,Acetylation (N-term); Carbamidomethylation; Oxidation (M),162191.52,"Arf-GAP with Rho-GAP domain, ANK repeat and PH domain-containing protein 1 OS=Homo sapiens OX=9606 GN=ARAP1 PE=1 SV=3"
479,TRUE,O75131	CPNE3_HUMAN,216.66458,12,,,6669.3223,3103.1694,4891.217,279.36728,5419.7695,6639.1865,52916.176,54560.125,2408.712,1763.3745,11,1,,12,7,6,3,9,10,9,13,6,8,Carbamidomethylation; Oxidation (M),60130.63,Copine-3 OS=Homo sapiens OX=9606 GN=CPNE3 PE=1 SV=1
59,TRUE,O75051	PLXA2_HUMAN,435.99686,50,49007.902,100856.29,63393.367,63552.953,76232.266,8917.913,40073.09,78873.56,53736.97,86553.14,47143.82,48860.81,39,82,97,63,56,84,52,70,80,62,75,75,82,Oxidation (M); Carbamidomethylation,211104.08,Plexin-A2 OS=Homo sapiens OX=9606 GN=PLXNA2 PE=1 SV=4
886,TRUE,Q9BPZ7	SIN1_HUMAN,190.20955,6,853.32605,2411.6567,4668.3657,3652.8647,723.8981,,912.13965,1652.1174,5984.9316,5832.0063,134.63013,1178.0044,6,2,4,6,5,1,1,3,6,8,9,2,2,Acetylation (N-term); Carbamidomethylation,59122.83,Target of rapamycin complex 2 subunit MAPKAP1 OS=Homo sapiens OX=9606 GN=MAPKAP1 PE=1 SV=2
912,TRUE,Q92696	PGTA_HUMAN,158.27977,6,,,2493.7588,2546.9446,2032.6885,,302.9306,2199.9292,3720.5708,3984.605,,,6,,1,5,3,7,3,7,7,5,9,,,Carbamidomethylation,65071.773,Geranylgeranyl transferase type-2 subunit alpha OS=Homo sapiens OX=9606 GN=RABGGTA PE=1 SV=2
205,TRUE,O75534	CSDE1_HUMAN,321.79123,26,1531.713,4579.5747,21818.83,19892.84,14498.071,763.22363,12497.193,17073.795,29150.785,33033.09,5151.1523,7871.1016,26,8,13,32,31,23,12,21,19,36,30,12,10,Carbamidomethylation; Oxidation (M),88884.66,Cold shock domain-containing protein E1 OS=Homo sapiens OX=9606 GN=CSDE1 PE=1 SV=2
801,TRUE,P67870	CSK2B_HUMAN,230.32234,6,29637.855,60788.59,25588.246,24413.719,8638.763,611.4579,4871.3745,7485.7217,39334.344,40492.676,11651.092,18474.902,6,18,22,11,12,7,4,8,6,12,15,8,7,Carbamidomethylation; Oxidation (M),24942.416,Casein kinase II subunit beta OS=Homo sapiens OX=9606 GN=CSNK2B PE=1 SV=1
1394,TRUE,O75695	XRP2_HUMAN,91.99692,2,660.6916,967.3393,2658.638,2177.749,648.7718,,,,1545.2228,1320.604,,,2,1,1,1,1,1,,,,3,2,,,,39641.062,Protein XRP2 OS=Homo sapiens OX=9606 GN=RP2 PE=1 SV=4
868,TRUE,P56962	STX17_HUMAN,216.33174,7,106.63936,1277.5446,2520.6084,744.2294,,,,,2433.9487,2368.5752,125.884544,373.82825,7,5,10,11,9,1,,1,3,5,5,3,3,Oxidation (M),33403.496,Syntaxin-17 OS=Homo sapiens OX=9606 GN=STX17 PE=1 SV=2
932,TRUE,Q9H6B4	CLMP_HUMAN,171.77904,5,957.1782,1023.04016,,,867.4793,,933.12836,,1350.3212,1385.9404,870.7455,380.19254,5,4,4,2,,6,,3,1,4,4,3,4,Oxidation (M),41280.715,CXADR-like membrane protein OS=Homo sapiens OX=9606 GN=CLMP PE=1 SV=1
256,TRUE,Q9H8M5	CNNM2_HUMAN,290.5359,20,,959.12976,6110.3096,1188.695,4234.7705,,1723.4552,4344.309,5083.0435,4491.7656,,506.0456,13,12,15,23,19,16,13,18,21,17,23,13,16,Carbamidomethylation; Oxidation (M),96623.27,Metal transporter CNNM2 OS=Homo sapiens OX=9606 GN=CNNM2 PE=1 SV=2
363,TRUE,P04632	CPNS1_HUMAN,260.64017,10,530.85144,1882.3945,14639.997,8592.73,2231.681,,2054.102,4720.491,34253.277,38098.848,1548.6334,1353.1674,10,13,14,25,14,15,8,13,15,25,20,7,14,Acetylation (N-term); Oxidation (M); Carbamidomethylation,28315.707,Calpain small subunit 1 OS=Homo sapiens OX=9606 GN=CAPNS1 PE=1 SV=1
970,TRUE,Q93096	TP4A1_HUMAN,171.03279,4,,,1097.116,455.84518,,,,,612.69763,843.4346,,,4,,,5,7,,,,,3,4,,,Oxidation (M); Carbamidomethylation,19815.076,Protein tyrosine phosphatase type IVA 1 OS=Homo sapiens OX=9606 GN=PTP4A1 PE=1 SV=2
462,TRUE,O95793	STAU1_HUMAN,254.30402,13,3159.4468,5006.8584,19338.45,12010.689,2133.5503,,895.35754,455.04263,13085.942,7855.0605,2109.5479,1603.933,13,12,16,19,15,7,1,5,6,14,17,12,10,Carbamidomethylation; Oxidation (M),63182.277,Double-stranded RNA-binding protein Staufen homolog 1 OS=Homo sapiens OX=9606 GN=STAU1 PE=1 SV=2
252,TRUE,Q16658	FSCN1_HUMAN,349.17178,19,904.98584,3118.6567,50133.938,42538.402,43431.98,8087.917,39043.406,67370.84,72211.29,70807.26,3618.2695,5072.3037,19,5,4,31,30,28,21,24,37,37,40,8,9,Carbamidomethylation; Oxidation (M),54529.992,Fascin OS=Homo sapiens OX=9606 GN=FSCN1 PE=1 SV=3
971,TRUE,Q13685	AAMP_HUMAN,147.85713,5,,,1430.667,666.11414,1529.8604,,902.40826,2741.3723,1969.1533,1985.2617,,,5,,,2,1,4,1,2,6,2,2,,,Carbamidomethylation,46750.91,Angio-associated migratory cell protein OS=Homo sapiens OX=9606 GN=AAMP PE=1 SV=2
45,TRUE,O60610	DIAP1_HUMAN,426.03333,48,7265.314,19013.564,118613.38,76462.45,34687.23,2422.9182,26660.479,43365.387,158126.88,136120.28,17810.545,25264.404,48,21,37,102,87,49,24,46,62,98,101,46,47,Oxidation (M); Carbamidomethylation,141347.33,Protein diaphanous homolog 1 OS=Homo sapiens OX=9606 GN=DIAPH1 PE=1 SV=2
1121,TRUE,Q15361	TTF1_HUMAN,149.9926,4,,,,235.98708,,,,,2588.6072,2678.9736,,,4,,,5,1,,,,,4,4,,1,,103051.016,Transcription termination factor 1 OS=Homo sapiens OX=9606 GN=TTF1 PE=1 SV=3
619,TRUE,Q9NR28	DBLOH_HUMAN,267.41498,9,345.96368,774.68085,36785.066,25241.07,1086.523,,,266.819,27223.336,24119.707,192.52489,278.7758,9,4,3,22,14,4,,,2,16,14,1,3,Oxidation (M),27130.809,"Diablo homolog, mitochondrial OS=Homo sapiens OX=9606 GN=DIABLO PE=1 SV=1"
1089,TRUE,Q5EBL4	RIPL1_HUMAN,153.96677,4,,,,,,,,,,806.202,,,4,,,,1,,,,,1,3,,,,47107.934,RILP-like protein 1 OS=Homo sapiens OX=9606 GN=RILPL1 PE=1 SV=1
1072,TRUE,Q9Y5G0	PCDGH_HUMAN,130.09087,4,,308.96603,,,,,422.39105,199.18927,,256.16867,86.06825,513.56757,3,1,3,2,,1,,2,1,1,2,4,3,,99875.125,Protocadherin gamma-B5 OS=Homo sapiens OX=9606 GN=PCDHGB5 PE=2 SV=1
966,TRUE,O75882	ATRN_HUMAN,177.52202,5,159.7941,745.2602,211.23076,,1088.862,,424.6474,980.7401,226.0528,322.35278,324.5057,512.62305,5,2,5,4,2,5,,3,5,1,1,5,6,,158536.88,Attractin OS=Homo sapiens OX=9606 GN=ATRN PE=1 SV=2
1230,TRUE,Q8TCZ2	C99L2_HUMAN,141.05655,3,,138.08246,103.606766,,2119.5544,,1018.76416,2611.0923,635.69507,1325.3501,193.25438,259.88763,3,2,5,1,,2,1,5,3,4,5,2,4,Carbamidomethylation,27985.883,CD99 antigen-like protein 2 OS=Homo sapiens OX=9606 GN=CD99L2 PE=1 SV=1
1303,TRUE,O94898	LRIG2_HUMAN,104.61047,2,,263.12793,,,182.28807,,,,,,,,2,1,1,,,3,,,,,,,,,118965.16,Leucine-rich repeats and immunoglobulin-like domains protein 2 OS=Homo sapiens OX=9606 GN=LRIG2 PE=1 SV=3
116,TRUE,Q86W92	LIPB1_HUMAN,342.05777,27,7763.9995,14457.232,17570.31,12859.756,12462.149,484.37518,8917.558,14925.984,20978.639,16287.819,8164.5103,11824.219,27,31,30,40,28,28,18,24,27,31,39,29,28,Oxidation (M); Carbamidomethylation,114024.09,Liprin-beta-1 OS=Homo sapiens OX=9606 GN=PPFIBP1 PE=1 SV=2
1047,TRUE,O00194	RB27B_HUMAN,159.91315,4,,,858.8273,512.16394,,,,,,,,,2,11,10,16,18,9,7,4,7,11,14,9,5,Oxidation (M),24607.844,Ras-related protein Rab-27B OS=Homo sapiens OX=9606 GN=RAB27B PE=1 SV=4
176,TRUE,Q8TDW0	LRC8C_HUMAN,344.03598,28,14414.549,27231.127,35257.29,25583.97,43470.62,3329.1963,26998.504,46037.71,41518.29,38015.023,15890.213,22970.047,25,23,23,31,29,33,18,27,28,29,32,22,23,Oxidation (M); Carbamidomethylation,92449.55,Volume-regulated anion channel subunit LRRC8C OS=Homo sapiens OX=9606 GN=LRRC8C PE=1 SV=2
693,TRUE,P62979	RS27A_HUMAN,237.81012,7,88056.43,137605.64,273334.44,260739.27,322625.5,142883.31,218658.83,303838.88,323588.94,330591,99666.38,124832.11,7,15,16,28,30,22,15,15,21,24,31,16,14,Carbamidomethylation; Acetylation (N-term); Oxidation (M),17964.914,Ubiquitin-40S ribosomal protein S27a OS=Homo sapiens OX=9606 GN=RPS27A PE=1 SV=2
1005,TRUE,Q9NZN8	CNOT2_HUMAN,137.0065,5,,864.0715,,453.7225,,,,,1209.8374,1210.9504,,284.54755,5,,1,1,1,,,,,5,2,,2,Carbamidomethylation,59737.695,CCR4-NOT transcription complex subunit 2 OS=Homo sapiens OX=9606 GN=CNOT2 PE=1 SV=1
1242,TRUE,Q15382	RHEB_HUMAN,137.59581,3,1302.5085,1973.8668,3800.126,2172.474,987.33105,,956.955,1200.936,4717.7373,5407.1523,2908.9197,2366.7996,3,2,3,2,1,1,1,3,1,2,5,3,1,,20497.48,GTP-binding protein Rheb OS=Homo sapiens OX=9606 GN=RHEB PE=1 SV=1
477,TRUE,Q9UPT5	EXOC7_HUMAN,236.71233,14,82.71364,968.43994,4175.0356,2109.1006,1301.2139,,175.32439,2545.7732,2412.1484,3735.1958,,392.49493,14,4,3,12,13,8,1,3,7,7,9,,4,Carbamidomethylation; Oxidation (M),83381.92,Exocyst complex component 7 OS=Homo sapiens OX=9606 GN=EXOC7 PE=1 SV=3
1105,TRUE,O75096	LRP4_HUMAN,94.046555,4,,141.4213,,,,,,106.084755,,,,,4,,1,,,1,,1,4,,,,,Acetylation (N-term); Carbamidomethylation,212044.86,Low-density lipoprotein receptor-related protein 4 OS=Homo sapiens OX=9606 GN=LRP4 PE=1 SV=4
33,TRUE,P23229	ITA6_HUMAN,530.10803,73,1047366.1,1676501.1,1254930.1,1006753.7,1428112.6,357454.16,1070742,1565595.4,1454210.5,1381539,1260239.8,1510123.8,73,224,270,272,221,246,153,210,269,229,239,235,269,Carbamidomethylation; Oxidation (M),126605.5,Integrin alpha-6 OS=Homo sapiens OX=9606 GN=ITGA6 PE=1 SV=5
109,TRUE,P08069	IGF1R_HUMAN,363.20203,31,36951.113,79566.26,20131.14,17121.514,44353.957,3741.2803,25426.889,60216.535,48368.38,48084.242,38213.707,57243.695,27,51,63,30,30,40,21,41,50,30,46,48,49,Oxidation (M); Carbamidomethylation,154793.05,Insulin-like growth factor 1 receptor OS=Homo sapiens OX=9606 GN=IGF1R PE=1 SV=1
593,TRUE,Q86SQ0	PHLB2_HUMAN,237.73268,11,1072.85,2982.02,2832.818,2942.0896,302.84293,,,235.85587,3576.9648,3806.8208,523.3399,1288.056,11,5,7,7,8,5,,1,3,6,7,5,2,,142158.2,Pleckstrin homology-like domain family B member 2 OS=Homo sapiens OX=9606 GN=PHLDB2 PE=1 SV=2
179,TRUE,Q6P4Q7	CNNM4_HUMAN,371.18887,23,20145.941,42794.24,43027.574,33960.55,51512.406,7913.596,32506.69,58590.516,49748.19,66444.93,28930.668,42410.812,20,28,35,29,38,35,21,31,41,39,41,33,34,Carbamidomethylation; Oxidation (M),86606.89,Metal transporter CNNM4 OS=Homo sapiens OX=9606 GN=CNNM4 PE=1 SV=3
431,TRUE,Q92508	PIEZ1_HUMAN,265.9147,15,,841.8311,292.09924,334.9439,4922.493,,1439.1162,9044.627,7011.377,6737.494,252.36055,106.02269,15,1,2,5,4,15,5,11,22,5,12,2,4,,286789.62,Piezo-type mechanosensitive ion channel component 1 OS=Homo sapiens OX=9606 GN=PIEZO1 PE=1 SV=4
854,TRUE,Q96AC1	FERM2_HUMAN,189.13286,6,,,503.74823,239.83832,,,,561.2357,1196.8496,924.5784,,,5,,,4,5,6,2,3,4,2,3,,,Oxidation (M),77860.53,Fermitin family homolog 2 OS=Homo sapiens OX=9606 GN=FERMT2 PE=1 SV=1
899,TRUE,Q9NW15	ANO10_HUMAN,169.0239,5,,,3769.6492,2355.899,,,,,808.1017,637.13855,,,5,,,7,7,,,,,3,3,,,Oxidation (M),76329.36,Anoctamin-10 OS=Homo sapiens OX=9606 GN=ANO10 PE=1 SV=2
977,TRUE,P49773	HINT1_HUMAN,159.2896,4,,,5056.1167,714.97815,,,,,15033.354,15383.207,,,4,,,4,5,,,,,8,7,,,Carbamidomethylation; Oxidation (M),13801.903,Histidine triad nucleotide-binding protein 1 OS=Homo sapiens OX=9606 GN=HINT1 PE=1 SV=2
681,TRUE,Q15642	CIP4_HUMAN,229.01001,9,,,4361.1045,4555.1826,776.5292,,858.9735,1213.4512,10004.311,8642.599,,,9,,1,11,14,9,3,9,8,10,11,1,,,68352.26,Cdc42-interacting protein 4 OS=Homo sapiens OX=9606 GN=TRIP10 PE=1 SV=3
250,TRUE,Q13177	PAK2_HUMAN,303.2961,20,,1048.7495,20654.97,12641.273,3128.5059,,3994.6013,6985.812,29717.229,23466.418,884.20935,1452.9404,16,,10,23,17,15,,16,20,30,22,4,8,Carbamidomethylation; Oxidation (M); Acetylation (N-term),58042.605,Serine/threonine-protein kinase PAK 2 OS=Homo sapiens OX=9606 GN=PAK2 PE=1 SV=3
621,TRUE,Q9UMX0	UBQL1_HUMAN,223.92131,7,,,324.45068,3677.1116,117.80667,,,,5762.8315,8330.929,,,3,,,14,7,1,,,1,19,14,,,Oxidation (M),62518.89,Ubiquilin-1 OS=Homo sapiens OX=9606 GN=UBQLN1 PE=1 SV=2
73,TRUE,Q5UIP0	RIF1_HUMAN,406.68405,50,6242.3384,17850.506,26796.385,16289.339,,,,,31900.182,32733.58,7594.2993,13877.364,50,34,60,59,54,2,,1,,60,51,35,38,Carbamidomethylation; Oxidation (M),274465.6,Telomere-associated protein RIF1 OS=Homo sapiens OX=9606 GN=RIF1 PE=1 SV=2
921,TRUE,Q9GZM5	YIPF3_HUMAN,154.81387,4,,,,,1710.8539,,,,974.19037,91.3,,,4,,,2,3,4,2,,1,3,4,,,Oxidation (M),38247.496,Protein YIPF3 OS=Homo sapiens OX=9606 GN=YIPF3 PE=1 SV=1
369,TRUE,Q8N271	PROM2_HUMAN,271.17694,17,7509.217,10336.737,11903.632,9169.128,36413.71,3493.3623,17119.357,20055.182,14685.789,14459.143,7084.883,9174.984,17,6,10,17,14,29,18,18,20,11,15,7,7,Oxidation (M); Carbamidomethylation,91883.05,Prominin-2 OS=Homo sapiens OX=9606 GN=PROM2 PE=1 SV=1
685,TRUE,P48029	SC6A8_HUMAN,239.60202,9,3529.436,7435.9385,3563.667,2236.1758,30466.203,5765.22,24230.664,35211.113,12342.738,13359.729,7967.061,8407.177,8,6,6,7,9,18,11,14,16,7,7,10,8,Carbamidomethylation,70522.77,Sodium- and chloride-dependent creatine transporter 1 OS=Homo sapiens OX=9606 GN=SLC6A8 PE=1 SV=1
1238,TRUE,Q9HD67	MYO10_HUMAN,128.8144,3,,,255.70262,136.70378,,,,,498.73288,249.62878,,,3,,,2,3,1,,,1,3,1,,1,,237346.9,Unconventional myosin-X OS=Homo sapiens OX=9606 GN=MYO10 PE=1 SV=3
1080,TRUE,P61769	B2MG_HUMAN,189.07507,4,13672.086,31637.629,79038.625,58616.812,62458.273,16928.854,28281.973,76644.5,70204.53,74759.484,16332.094,18273.277,4,6,7,12,9,16,6,11,13,11,13,6,6,Carbamidomethylation,13714.561,Beta-2-microglobulin OS=Homo sapiens OX=9606 GN=B2M PE=1 SV=1
890,TRUE,Q96CX2	KCD12_HUMAN,167.5691,5,,318.39664,1845.0127,409.2806,184.86995,,419.23755,838.6889,4320.188,9662.094,185.37747,347.60822,5,1,3,5,4,2,,4,5,10,9,1,2,Carbamidomethylation; Oxidation (M),35700.777,BTB/POZ domain-containing protein KCTD12 OS=Homo sapiens OX=9606 GN=KCTD12 PE=1 SV=1
1273,TRUE,P20309	ACM3_HUMAN,165.29916,3,268.90472,513.4603,,,781.25726,,1430.6954,2975.4314,2955.2085,2898.9656,1932.261,2901.2979,3,1,1,,,1,,1,4,3,3,3,6,,66128.11,Muscarinic acetylcholine receptor M3 OS=Homo sapiens OX=9606 GN=CHRM3 PE=1 SV=1
26,TRUE,P46940	IQGA1_HUMAN,522.75543,74,48550.176,101958.61,415368.94,327359,228688.08,39885.785,194553.97,302100.5,460977.12,479424.97,79960.67,99650.23,72,83,92,174,164,145,78,122,129,181,186,89,89,Carbamidomethylation; Oxidation (M); Acetylation (N-term),189251.97,Ras GTPase-activating-like protein IQGAP1 OS=Homo sapiens OX=9606 GN=IQGAP1 PE=1 SV=1
642,TRUE,Q13546	RIPK1_HUMAN,198.93457,10,350.25745,1032.6133,2086.2002,938.6313,411.4165,,,,2108.941,1456.4974,362.60156,322.03775,10,6,11,7,7,6,1,1,1,9,7,7,3,,75930.84,Receptor-interacting serine/threonine-protein kinase 1 OS=Homo sapiens OX=9606 GN=RIPK1 PE=1 SV=3
1402,TRUE,Q9UP38	FZD1_HUMAN,111.82857,2,309.9082,1743.6353,1099.0874,381.16895,236.33818,,346.31937,865.7432,642.391,589.7401,150.33041,635.0193,2,2,1,2,2,2,2,3,2,1,3,1,1,Oxidation (M),71158.31,Frizzled-1 OS=Homo sapiens OX=9606 GN=FZD1 PE=1 SV=2
1025,TRUE,Q8TAA9	VANG1_HUMAN,156.7912,5,,79.3743,1308.9447,352.64377,478.99036,,,,,,,,5,1,1,3,4,2,1,,,1,4,,,,59974.984,Vang-like protein 1 OS=Homo sapiens OX=9606 GN=VANGL1 PE=1 SV=1
751,TRUE,P30511	HLAF_HUMAN,228.30128,8,838.80005,4330.284,7228.783,4642.3486,8826.606,341.88477,264.12946,2273.45,3240.467,3932.256,745.45215,2502.0781,7,7,8,11,7,9,13,5,7,7,7,6,9,Carbamidomethylation,39061.676,"HLA class I histocompatibility antigen, alpha chain F OS=Homo sapiens OX=9606 GN=HLA-F PE=1 SV=3"
895,FALSE,Q96FJ2	DYL2_HUMAN,122.42529,2,26881.104,48583.227,70168.35,56434.508,27159.19,6792.2993,18755.041,32944.098,84901.09,83754.695,36983.457,54161.31,2,6,5,5,6,2,3,3,6,5,7,5,6,Carbamidomethylation,10349.831,"Dynein light chain 2, cytoplasmic OS=Homo sapiens OX=9606 GN=DYNLL2 PE=1 SV=1"
508,TRUE,Q8IXI1	MIRO2_HUMAN,262.1864,13,2985.0244,5419.9175,17410.482,13728.461,2537.4487,228.0525,1538.2925,1610.0372,13747.346,15539.765,2328.187,2305.7305,12,8,5,19,14,7,3,7,4,22,18,5,1,Carbamidomethylation,68117.83,Mitochondrial Rho GTPase 2 OS=Homo sapiens OX=9606 GN=RHOT2 PE=1 SV=2
335,TRUE,Q13425	SNTB2_HUMAN,280.86517,18,4157.4897,11611.245,15464.265,10916.587,20543.668,3166.4944,17944.121,23628.516,20325.555,20982.908,9981.713,11792.893,18,14,18,20,20,16,16,18,19,14,14,14,17,Carbamidomethylation; Oxidation (M),57949.59,Beta-2-syntrophin OS=Homo sapiens OX=9606 GN=SNTB2 PE=1 SV=1
1067,TRUE,O00481	BT3A1_HUMAN,124.37706,4,,,141.671,199.0944,,,,,,,,,2,4,3,2,2,4,,,2,2,1,1,4,,57677.184,Butyrophilin subfamily 3 member A1 OS=Homo sapiens OX=9606 GN=BTN3A1 PE=1 SV=3
1261,TRUE,Q9NQX5	NPDC1_HUMAN,144.39636,3,,,754.7636,601.32336,881.17,,474.0248,297.75616,,176.1432,,,3,,,1,2,2,1,3,5,2,1,,,,34516.383,Neural proliferation differentiation and control protein 1 OS=Homo sapiens OX=9606 GN=NPDC1 PE=1 SV=2
1266,TRUE,Q9Y6M0	TEST_HUMAN,138.00739,3,,,,,,,1308.6545,741.146,2718.5327,2833.1477,918.52783,416.40247,3,,,,,,,3,3,1,1,3,3,,34883.996,Testisin OS=Homo sapiens OX=9606 GN=PRSS21 PE=1 SV=1
1205,TRUE,Q8IYJ3	SYTL1_HUMAN,93.89926,3,,,1468.1553,220.14424,,,,,,799.9348,,,3,,,3,1,,,,,,1,,,,61857.105,Synaptotagmin-like protein 1 OS=Homo sapiens OX=9606 GN=SYTL1 PE=1 SV=1
90,TRUE,P05556	ITB1_HUMAN,386.89392,32,431626.12,693641.6,456856.75,342427.72,712395.5,179756.12,750239.9,1110462.9,868478.9,834711.56,958456.8,1082498.8,30,78,111,89,65,114,63,139,168,135,116,158,166,Carbamidomethylation; Oxidation (M),88415.266,Integrin beta-1 OS=Homo sapiens OX=9606 GN=ITGB1 PE=1 SV=2
660,TRUE,Q15904	VAS1_HUMAN,242.47899,9,,913.32056,9071.252,9055.749,13220.072,660.8518,1201.1936,4294.943,4238.5693,4519.061,,218.603,9,2,2,12,11,14,8,10,4,6,7,,2,Oxidation (M),52025.812,V-type proton ATPase subunit S1 OS=Homo sapiens OX=9606 GN=ATP6AP1 PE=1 SV=2
168,TRUE,P13797	PLST_HUMAN,344.1547,29,2054.2783,4345.1416,58886.72,41201.68,19598.684,349.17792,10789.876,28070.105,70675.7,50528.875,3114.4438,6469.9805,29,10,10,49,41,14,16,19,22,39,35,12,13,Acetylation (N-term); Carbamidomethylation; Oxidation (M),70811.016,Plastin-3 OS=Homo sapiens OX=9606 GN=PLS3 PE=1 SV=4
1397,TRUE,Q13107	UBP4_HUMAN,71.5122,2,,,174.24934,,,,,,,336.7632,,,2,,,3,,1,,,,,1,,,Oxidation (M),108565.06,Ubiquitin carboxyl-terminal hydrolase 4 OS=Homo sapiens OX=9606 GN=USP4 PE=1 SV=3
1384,TRUE,Q6N075	MFSD5_HUMAN,92.42781,2,,,,,,,,,,173.9737,,,2,,1,2,2,,,,,,1,,,,49764.586,Molybdate-anion transporter OS=Homo sapiens OX=9606 GN=MFSD5 PE=1 SV=2
286,FALSE,O60641	AP180_HUMAN,100.14856,2,,9639.938,8142.197,7011.3125,1323.8468,,775.5093,3040.8635,4072.3066,4215.968,1480.2937,,2,1,1,2,3,1,1,1,1,1,1,1,1,,92502.17,Clathrin coat assembly protein AP180 OS=Homo sapiens OX=9606 GN=SNAP91 PE=1 SV=2
630,TRUE,P62834	RAP1A_HUMAN,242.85387,9,,119.50345,3413.445,2817.9417,264.35278,,,,,383.06528,,,3,8,10,31,30,13,11,10,7,14,19,6,7,Carbamidomethylation; Oxidation (M),20987.176,Ras-related protein Rap-1A OS=Homo sapiens OX=9606 GN=RAP1A PE=1 SV=1
802,TRUE,Q8NCG7	DGLB_HUMAN,187.85262,8,,344.6489,2611.7456,986.4232,162.97849,,,,883.45905,667.7291,,178.09999,8,,2,8,2,1,,,,2,2,1,1,,73732.1,Diacylglycerol lipase-beta OS=Homo sapiens OX=9606 GN=DAGLB PE=1 SV=2
474,TRUE,Q8WWN8	ARAP3_HUMAN,263.15704,14,792.4202,678.6486,1705.113,1381.6069,,,186.85304,333.96515,2183.8484,3739.7463,1356.3712,1236.3721,14,6,3,10,8,,,3,3,10,13,8,8,Acetylation (N-term); Oxidation (M),169844.25,"Arf-GAP with Rho-GAP domain, ANK repeat and PH domain-containing protein 3 OS=Homo sapiens OX=9606 GN=ARAP3 PE=1 SV=1"
89,TRUE,O95573	ACSL3_HUMAN,399.05905,33,38268.168,58607.184,268677.84,221139.22,58423.89,8304.031,15170.356,25105.176,185324.33,152596.7,24007.076,27657.018,30,54,56,106,112,60,43,25,33,73,80,43,41,Oxidation (M); Carbamidomethylation,80420.086,Long-chain-fatty-acid--CoA ligase 3 OS=Homo sapiens OX=9606 GN=ACSL3 PE=1 SV=3
845,TRUE,Q9NVD7	PARVA_HUMAN,218.2913,7,347.5957,917.05206,4142.5815,3061.0186,1694.468,,1278.3923,3163.681,6861.213,5792.8335,1331.0646,1062.1539,5,2,3,10,10,7,4,9,8,11,11,5,3,,42243.723,Alpha-parvin OS=Homo sapiens OX=9606 GN=PARVA PE=1 SV=1
895,TRUE,P63167	DYL1_HUMAN,151.622,3,26881.104,48583.227,70168.35,56434.508,27159.19,6792.2993,18755.041,32944.098,84901.09,83754.695,36983.457,54161.31,3,6,5,7,7,2,3,3,6,7,10,5,6,Oxidation (M); Carbamidomethylation,10365.876,"Dynein light chain 1, cytoplasmic OS=Homo sapiens OX=9606 GN=DYNLL1 PE=1 SV=1"
1119,TRUE,Q9H4B6	SAV1_HUMAN,139.58002,4,,,,,,,,,845.9167,849.1551,,,4,,,,,,,,,3,4,1,,Carbamidomethylation,44633.957,Protein salvador homolog 1 OS=Homo sapiens OX=9606 GN=SAV1 PE=1 SV=2
636,TRUE,P60953	CDC42_HUMAN,246.69016,10,2684.8918,9776.437,56001.57,31179.352,14395.215,1086.6749,4667.0005,14834.394,46019.215,45399.496,395.9461,2102.0745,9,7,11,23,23,19,5,13,11,22,15,2,3,Carbamidomethylation,21258.604,Cell division control protein 42 homolog OS=Homo sapiens OX=9606 GN=CDC42 PE=1 SV=2
907,TRUE,Q13421	MSLN_HUMAN,185.7463,6,10489.84,18239.807,3605.7795,5075.5947,18230.98,568.9874,806.29065,1824.3584,458.08627,893.352,642.05444,3071.004,6,9,7,5,3,13,8,4,7,2,1,6,9,,68985.66,Mesothelin OS=Homo sapiens OX=9606 GN=MSLN PE=1 SV=2
846,TRUE,Q8IVF7	FMNL3_HUMAN,184.27942,7,823.9575,1916.5828,4773.0825,3397.393,3054.7048,,2283.258,2599.2334,5074.439,5423.376,1237.538,1321.025,7,6,5,4,6,5,2,5,5,5,6,3,2,,117212.83,Formin-like protein 3 OS=Homo sapiens OX=9606 GN=FMNL3 PE=1 SV=3
818,TRUE,P46934	NEDD4_HUMAN,178.8738,7,,,567.5261,322.98425,650.9659,,366.8962,511.37308,1775.744,922.93225,,,7,2,1,3,3,4,2,2,3,5,3,1,1,,149114.47,E3 ubiquitin-protein ligase NEDD4 OS=Homo sapiens OX=9606 GN=NEDD4 PE=1 SV=4
1068,TRUE,Q53TN4	CYBR1_HUMAN,147.73856,4,,3871.5383,10842.727,8407.98,216.56343,,,,9285.92,9250.241,1202.0314,1070.6915,4,3,4,6,7,1,,,,7,6,3,5,,31641.307,Cytochrome b reductase 1 OS=Homo sapiens OX=9606 GN=CYBRD1 PE=1 SV=1
1054,TRUE,P98196	AT11A_HUMAN,141.98576,5,,231.46129,,,841.47327,,260.03137,693.67896,344.09042,401.93158,,,5,1,1,3,2,6,2,1,8,1,3,,,Oxidation (M),129755.74,Probable phospholipid-transporting ATPase IH OS=Homo sapiens OX=9606 GN=ATP11A PE=1 SV=3
985,TRUE,Q9BPW8	NIPS1_HUMAN,164.67122,4,,,,,677.29877,1004.17847,2114.3223,7282.191,5881.212,2008.2117,,,4,,,,1,7,2,5,7,8,5,,,Oxidation (M),33309.977,Protein NipSnap homolog 1 OS=Homo sapiens OX=9606 GN=NIPSNAP1 PE=1 SV=1
1322,TRUE,Q68DD2	PA24F_HUMAN,60.390587,2,,,245.33522,6549.9165,,,,,,,,,2,,,2,1,,,,,,,,,,95082.34,Cytosolic phospholipase A2 zeta OS=Homo sapiens OX=9606 GN=PLA2G4F PE=1 SV=3
554,TRUE,Q14165	MLEC_HUMAN,264.66534,11,2739.23,6164.599,36127.367,30514.71,1597.1593,,332.3169,1322.5507,30284.117,37471.336,2703.933,2915.347,11,7,11,26,20,6,3,5,8,22,22,5,7,Carbamidomethylation; Oxidation (M),32233.865,Malectin OS=Homo sapiens OX=9606 GN=MLEC PE=1 SV=1
408,TRUE,P62873	GBB1_HUMAN,322.62338,13,1987.5504,3999.215,62182.92,41740.965,31351.188,8501.688,24993.258,37180.977,63916.973,66896.77,2533.081,3724.4094,7,8,13,33,28,19,14,16,26,29,27,9,9,Carbamidomethylation; Oxidation (M); Acetylation (N-term),37376.96,Guanine nucleotide-binding protein G(I)/G(S)/G(T) subunit beta-1 OS=Homo sapiens OX=9606 GN=GNB1 PE=1 SV=3
420,TRUE,P09429	HMGB1_HUMAN,261.76312,11,261.4282,1274.1503,40871.47,31247.271,5000.759,,7261.1055,13558.356,59541.574,62055.21,2180.9883,2769.461,11,1,1,24,21,2,1,7,10,23,29,2,2,Oxidation (M); Carbamidomethylation,24893.756,High mobility group protein B1 OS=Homo sapiens OX=9606 GN=HMGB1 PE=1 SV=3
288,TRUE,Q86UE4	LYRIC_HUMAN,339.88202,20,5389.3203,15754.2295,88574.76,62417.605,10206.084,280.0809,5433.0537,9393.169,83339.99,85348.734,5302.2065,6608.3535,20,19,22,46,41,19,9,16,15,33,44,15,13,Oxidation (M),63836.98,Protein LYRIC OS=Homo sapiens OX=9606 GN=MTDH PE=1 SV=2
125,TRUE,Q9H2M9	RBGPR_HUMAN,348.70242,34,3360.5085,6064.694,32782.73,25284.264,12486.572,864.5461,27403.037,10341.479,29915.652,37128.473,5499.6235,5078.2607,34,16,18,45,34,24,18,25,25,53,45,21,15,Oxidation (M); Carbamidomethylation,155984.77,Rab3 GTPase-activating protein non-catalytic subunit OS=Homo sapiens OX=9606 GN=RAB3GAP2 PE=1 SV=1
827,TRUE,Q658P3	STEA3_HUMAN,190.693,7,,552.29407,3406.2583,3111.1348,2618.3735,,2744.8413,5339.6626,13702.073,14020.254,614.78687,1485.8307,7,1,2,5,6,4,3,3,8,8,7,3,3,Carbamidomethylation,54600.64,Metalloreductase STEAP3 OS=Homo sapiens OX=9606 GN=STEAP3 PE=1 SV=2
945,TRUE,P27701	CD82_HUMAN,173.90082,5,1563.8967,,4077.8755,3687.9316,53801.04,13803.8,11819.238,18868.697,125.97082,,,,5,2,3,4,7,8,11,6,7,1,2,1,,Oxidation (M),29625.512,CD82 antigen OS=Homo sapiens OX=9606 GN=CD82 PE=1 SV=1
807,TRUE,O00220	TR10A_HUMAN,194.07002,5,,,10717.998,2435.5024,3425.8215,,5333.4097,10484.982,21582.848,24253.986,745.0201,878.9481,5,,,7,7,6,5,7,7,10,11,3,2,Oxidation (M),50089.008,Tumor necrosis factor receptor superfamily member 10A OS=Homo sapiens OX=9606 GN=TNFRSF10A PE=1 SV=3
103,TRUE,P25705	ATPA_HUMAN,470.54697,39,297485.5,557212.94,1108724.8,909672,392120.1,95419.45,248468.88,352109.7,1187186.9,1157790.9,376294.3,445511.6,39,102,106,140,126,102,56,89,87,155,157,103,102,Oxidation (M); Carbamidomethylation,59750.625,"ATP synthase subunit alpha, mitochondrial OS=Homo sapiens OX=9606 GN=ATP5F1A PE=1 SV=1"
175,TRUE,Q9Y3Z3	SAMH1_HUMAN,324.53436,25,13738.632,36630.805,58603.457,42769.08,9708.596,,,9786.59,15815.519,20586.79,3221.3745,6087.387,25,32,38,54,44,25,14,3,12,24,27,18,17,Oxidation (M); Carbamidomethylation,72200.5,Deoxynucleoside triphosphate triphosphohydrolase SAMHD1 OS=Homo sapiens OX=9606 GN=SAMHD1 PE=1 SV=2
118,TRUE,P05141	ADT2_HUMAN,359.27002,31,382707.8,427852.06,1000774.94,866503.5,389824.6,133344.03,210427.08,264132.4,631973.56,643981.2,313251.56,350741.94,19,87,107,219,206,71,44,58,64,169,177,75,62,Oxidation (M); Carbamidomethylation; Acetylation (N-term),32852.227,ADP/ATP translocase 2 OS=Homo sapiens OX=9606 GN=SLC25A5 PE=1 SV=7
55,TRUE,P0DMV9	HS71B_HUMAN,457.66452,56,28339.055,55652.88,286955.3,214444.98,65453.797,11411.8125,57943.453,80605.38,438829.34,461357.6,40768.727,61607.785,24,63,63,133,127,67,50,64,72,163,160,66,65,Acetylation (N-term); Oxidation (M); Carbamidomethylation,70052.23,Heat shock 70 kDa protein 1B OS=Homo sapiens OX=9606 GN=HSPA1B PE=1 SV=1
649,TRUE,P28290	ITPI2_HUMAN,195.2296,9,440.90134,475.515,2317.128,1924.4132,,,,,2665.2063,3796.293,563.94696,,9,4,1,10,6,,,,,8,5,2,,Oxidation (M),138385.88,Protein ITPRID2 OS=Homo sapiens OX=9606 GN=ITPRID2 PE=1 SV=3
1321,TRUE,P61077	UB2D3_HUMAN,120.172226,2,,2093.7258,8976.487,7038.789,4302.489,,3124.535,5730.7285,6614.1074,7333.1694,1275.3601,1923.7838,2,1,1,4,4,1,1,1,1,2,2,1,1,Carbamidomethylation,16687.158,Ubiquitin-conjugating enzyme E2 D3 OS=Homo sapiens OX=9606 GN=UBE2D3 PE=1 SV=1
18,TRUE,P60709	ACTB_HUMAN,543.5721,83,291.18414,1500.7441,20017.074,13936.483,458.9079,,704.1438,1776.6812,18967.52,21412.852,,,2,157,185,508,418,181,123,184,217,477,463,172,189,Acetylation (N-term); Oxidation (M); Carbamidomethylation,41736.73,"Actin, cytoplasmic 1 OS=Homo sapiens OX=9606 GN=ACTB PE=1 SV=1"
1060,TRUE,Q9Y5L3	ENTP2_HUMAN,163.91223,3,347.78864,1243.7014,,,3324.2563,,458.2077,1572.0101,4269.8496,3203.1853,412.0808,3493.4014,3,3,8,2,,13,3,5,7,6,4,6,10,Oxidation (M),53665.473,Ectonucleoside triphosphate diphosphohydrolase 2 OS=Homo sapiens OX=9606 GN=ENTPD2 PE=1 SV=1
111,TRUE,O94832	MYO1D_HUMAN,345.40482,34,705.8889,4798.4575,30446.682,25506.895,26355.79,413.27237,6556.9834,14812.301,8874.502,6937.863,573.4645,767.45447,33,11,13,49,39,33,22,24,32,23,25,5,6,Carbamidomethylation; Oxidation (M),116202.19,Unconventional myosin-Id OS=Homo sapiens OX=9606 GN=MYO1D PE=1 SV=2
271,TRUE,Q13618	CUL3_HUMAN,291.46494,19,,2067.7566,16796.57,13086.913,6246.5645,335.8647,2802.3044,7679.9346,26862.066,20764.545,494.53433,2055.6174,19,5,10,22,13,12,13,11,12,25,21,8,7,Oxidation (M); Carbamidomethylation,88930.19,Cullin-3 OS=Homo sapiens OX=9606 GN=CUL3 PE=1 SV=2
606,TRUE,Q5VZ89	DEN4C_HUMAN,180.07614,11,207.595,729.6001,1060.9368,702.17004,75.38625,,,397.64023,1485.679,1077.5044,777.9521,462.47995,11,4,2,6,4,2,,1,2,6,6,4,4,Carbamidomethylation,212710.64,DENN domain-containing protein 4C OS=Homo sapiens OX=9606 GN=DENND4C PE=1 SV=3
56,TRUE,P14923	PLAK_HUMAN,455.74622,44,401548,623403.3,570284.7,386686.7,271080.53,61462.22,244005.56,334573.78,743064.44,759103.8,379149.62,411261.28,35,147,168,166,160,105,68,107,131,176,179,110,118,Carbamidomethylation; Oxidation (M); Acetylation (N-term),81744.74,Junction plakoglobin OS=Homo sapiens OX=9606 GN=JUP PE=1 SV=3
962,TRUE,Q6PJF5	RHDF2_HUMAN,183.06573,5,,549.0838,2039.7966,997.1631,325.87274,,417.8003,1141.6465,6638.089,5460.978,578.83514,792.33307,5,,2,2,2,2,,4,3,7,9,1,2,,96686.14,Inactive rhomboid protein 2 OS=Homo sapiens OX=9606 GN=RHBDF2 PE=1 SV=2
938,TRUE,Q01844	EWS_HUMAN,205.55377,4,5859.737,15663.271,18061.986,12464.834,1293.406,,173.75339,2438.1592,30262.316,30330.365,11883.005,18466.953,4,8,6,12,13,2,2,2,1,8,10,6,11,Carbamidomethylation; Oxidation (M),68478.234,RNA-binding protein EWS OS=Homo sapiens OX=9606 GN=EWSR1 PE=1 SV=1
1211,TRUE,Q9BWU0	NADAP_HUMAN,112.72201,3,,,232.21957,,,,,,577.1156,399.2903,,,3,,2,2,1,,,,,2,3,,,,88814.125,Kanadaptin OS=Homo sapiens OX=9606 GN=SLC4A1AP PE=1 SV=1
604,TRUE,P20337	RAB3B_HUMAN,254.13846,7,,2218.9246,3298.21,143.91266,97.576515,,,395.62592,2203.5645,2942.9307,,186.71695,4,21,21,25,25,16,13,8,10,22,26,13,12,Oxidation (M),24757.895,Ras-related protein Rab-3B OS=Homo sapiens OX=9606 GN=RAB3B PE=1 SV=2
156,TRUE,P15311	EZRI_HUMAN,376.34442,28,842.9852,4757.729,104569.15,74423.12,5966.1025,294.2467,7356.8936,16763.766,128376.2,121720.375,782.44543,859.7324,21,10,14,78,63,24,17,30,24,72,62,14,9,Oxidation (M); Carbamidomethylation,69412.805,Ezrin OS=Homo sapiens OX=9606 GN=EZR PE=1 SV=4
829,TRUE,Q99653	CHP1_HUMAN,208.92616,7,,,8122.5703,4038.7744,263.29474,,,,651.64685,3698.985,,,7,,,9,13,2,,,1,4,4,,,,22456.184,Calcineurin B homologous protein 1 OS=Homo sapiens OX=9606 GN=CHP1 PE=1 SV=3
423,TRUE,P05067	A4_HUMAN,258.4084,11,7676.0205,14383.939,7021.6743,7273.819,14967.273,1543.6371,7305.059,12546.804,7626.0684,8925.96,10312.381,13065.932,11,9,15,16,11,14,5,7,16,23,18,12,16,Oxidation (M),86943.24,Amyloid-beta precursor protein OS=Homo sapiens OX=9606 GN=APP PE=1 SV=3
503,TRUE,Q9BW04	SARG_HUMAN,277.84525,13,2051.871,4207.509,6430.8755,8618.591,34659.547,,632.8639,5299.5537,17625.098,15826.131,2704.0151,3585.2847,13,5,7,11,10,14,3,3,7,13,12,6,5,Carbamidomethylation,63964.297,Specifically androgen-regulated gene protein OS=Homo sapiens OX=9606 GN=SARG PE=1 SV=2
136,TRUE,P11717	MPRI_HUMAN,389.24597,33,8941.167,16322.88,39601.734,24287.832,39412.89,4448.4097,20358.24,36376.23,56559.41,60758.316,8936.549,14175.651,33,26,36,41,33,36,32,32,37,48,38,23,28,Oxidation (M); Carbamidomethylation,274374.8,Cation-independent mannose-6-phosphate receptor OS=Homo sapiens OX=9606 GN=IGF2R PE=1 SV=3
262,TRUE,Q14118	DAG1_HUMAN,333.1126,19,13336.248,29127.129,14384.08,18312.602,50508.832,10731.504,62027.53,112856.18,44112.164,47501.42,26688.73,55664.957,19,22,31,23,14,39,18,40,51,29,34,32,25,Carbamidomethylation; Oxidation (M),97441.484,Dystroglycan OS=Homo sapiens OX=9606 GN=DAG1 PE=1 SV=2
79,TRUE,P13010	XRCC5_HUMAN,468.13785,38,2195.4412,7258.953,191873.06,142126.94,30871.834,2959.8052,21041.879,39632.656,238461.75,231820.56,6297.4365,6087.581,38,16,17,82,71,35,13,33,41,84,79,14,8,Oxidation (M); Carbamidomethylation,82704.54,X-ray repair cross-complementing protein 5 OS=Homo sapiens OX=9606 GN=XRCC5 PE=1 SV=3
1057,TRUE,O43572	AKA10_HUMAN,120.6725,4,,,376.3316,746.861,,,,,,,,,4,1,1,2,4,,,1,1,,1,,,,73818.18,"A-kinase anchor protein 10, mitochondrial OS=Homo sapiens OX=9606 GN=AKAP10 PE=1 SV=2"
678,TRUE,Q9NPF4	OSGEP_HUMAN,186.74286,8,784.7434,1546.1863,3373.9658,2911.544,839.4198,,130.73705,,393.95114,1443.1681,568.62854,335.64395,8,4,4,8,9,4,,1,2,6,6,3,2,Carbamidomethylation; Oxidation (M),36426.82,Probable tRNA N6-adenosine threonylcarbamoyltransferase OS=Homo sapiens OX=9606 GN=OSGEP PE=1 SV=1
346,TRUE,Q15223	NECT1_HUMAN,303.21042,16,24223.291,50290.45,44969.984,23610.23,53756.797,6680.3086,29326.426,69816.234,64851.945,74162.34,48481.285,56657.605,16,19,18,17,15,27,15,26,32,27,27,15,24,Carbamidomethylation; Oxidation (M),57158.17,Nectin-1 OS=Homo sapiens OX=9606 GN=NECTIN1 PE=1 SV=3
405,TRUE,P20340	RAB6A_HUMAN,234.89427,12,25497.809,42113.223,167208,135274.97,24552.531,3752.5527,11270.432,18661.164,91421.24,95875.83,15080.94,18449.16,11,27,28,42,47,21,20,15,18,28,32,24,18,Oxidation (M); Acetylation (N-term),23592.775,Ras-related protein Rab-6A OS=Homo sapiens OX=9606 GN=RAB6A PE=1 SV=3
595,TRUE,P61006	RAB8A_HUMAN,234.56421,8,2572.7058,639.5999,21900.86,20350.2,9116.022,,5260.257,5126.8936,11158.393,16528.441,1320.0923,296.47256,5,16,14,32,40,16,13,10,16,22,25,13,7,Oxidation (M),23668.2,Ras-related protein Rab-8A OS=Homo sapiens OX=9606 GN=RAB8A PE=1 SV=1
1348,TRUE,P36021	MOT8_HUMAN,75.8482,2,,482.43182,202.84563,,,,,,,,,,2,1,2,1,1,,,,,,,,,Acetylation (N-term),59511.406,Monocarboxylate transporter 8 OS=Homo sapiens OX=9606 GN=SLC16A2 PE=1 SV=2
709,TRUE,Q9Y639	NPTN_HUMAN,206.48778,7,5664.624,11269.604,29268.992,5179.024,52210.17,11441.929,36238.81,53808.562,37578.836,45022.35,5264.973,2520.5505,7,4,9,15,15,23,6,20,27,19,17,12,12,Carbamidomethylation; Oxidation (M),44387.18,Neuroplastin OS=Homo sapiens OX=9606 GN=NPTN PE=1 SV=2
935,TRUE,P27986	P85A_HUMAN,172.35173,6,,,,217.38882,,,,256.70215,712.0247,2496.7922,279.50998,553.86487,6,,,2,2,2,,1,3,4,12,1,3,Carbamidomethylation,83598.38,Phosphatidylinositol 3-kinase regulatory subunit alpha OS=Homo sapiens OX=9606 GN=PIK3R1 PE=1 SV=2
1045,TRUE,O95208	EPN2_HUMAN,175.87665,5,,305.45496,4437.6665,3526.3623,429.82855,,91.00978,,3025.837,3269.005,,339.6325,3,4,5,5,7,4,3,4,3,6,8,2,4,,68481.62,Epsin-2 OS=Homo sapiens OX=9606 GN=EPN2 PE=1 SV=3
543,TRUE,O14975	S27A2_HUMAN,246.15189,11,,,6149.774,6303.537,1262.777,,,328.46954,1824.7755,555.44604,136.4466,,11,,,17,15,6,,,2,5,13,1,,Oxidation (M),70312.305,Very long-chain acyl-CoA synthetase OS=Homo sapiens OX=9606 GN=SLC27A2 PE=1 SV=2
1041,TRUE,O43155	FLRT2_HUMAN,141.39383,4,926.6846,3364.415,,,1810.1974,,1149.8857,3180.2144,912.2406,826.9607,1187.6176,3088.2534,4,5,8,,1,4,1,7,5,1,1,5,6,Oxidation (M),74048.8,Leucine-rich repeat transmembrane protein FLRT2 OS=Homo sapiens OX=9606 GN=FLRT2 PE=1 SV=1
632,TRUE,Q13325	IFIT5_HUMAN,268.90863,10,1716.531,2005.3727,9898.619,14534.621,4164.8013,,1144.3896,,2872.099,5045.1343,,306.36755,10,9,8,16,10,7,4,3,2,7,10,3,5,Carbamidomethylation,55846.746,Interferon-induced protein with tetratricopeptide repeats 5 OS=Homo sapiens OX=9606 GN=IFIT5 PE=1 SV=1
430,TRUE,Q14315	FLNC_HUMAN,285.49188,15,,,,,,,,129.95265,4612.179,13456.214,,,5,7,6,17,16,11,7,13,16,26,19,8,11,Carbamidomethylation,291022.22,Filamin-C OS=Homo sapiens OX=9606 GN=FLNC PE=1 SV=3
153,TRUE,Q9UHG3	PCYOX_HUMAN,331.83932,18,903.4852,1482.19,86551.45,63276.42,25997.848,3457.8662,2580.4783,6211.4375,51452.89,53744.277,190.00436,269.5086,18,5,7,51,44,42,19,11,12,47,44,2,4,Carbamidomethylation; Oxidation (M),56640.133,Prenylcysteine oxidase 1 OS=Homo sapiens OX=9606 GN=PCYOX1 PE=1 SV=3
231,TRUE,P20591	MX1_HUMAN,325.18842,20,2667.5671,11686.642,56496.91,35663.344,15428.053,462.47687,,,,,,,18,19,20,45,39,25,23,,,,,,,Oxidation (M); Carbamidomethylation,75520.34,Interferon-induced GTP-binding protein Mx1 OS=Homo sapiens OX=9606 GN=MX1 PE=1 SV=4
334,TRUE,O00186	STXB3_HUMAN,288.34732,16,,193.14914,11215.485,7068.112,4042.419,,3767.7373,5232.279,5293.886,9254.361,213.867,336.95618,16,1,4,27,20,19,3,14,14,14,21,3,3,Carbamidomethylation; Oxidation (M),67764.27,Syntaxin-binding protein 3 OS=Homo sapiens OX=9606 GN=STXBP3 PE=1 SV=2
779,TRUE,Q9UNN8	EPCR_HUMAN,244.03247,7,86529.45,109633.04,105307.97,85222.86,138039.81,38720.5,75792.32,95628.3,86875.65,86885.734,80863.13,77441.21,7,16,23,17,16,24,16,17,21,19,20,21,17,Carbamidomethylation; Oxidation (M),26671.434,Endothelial protein C receptor OS=Homo sapiens OX=9606 GN=PROCR PE=1 SV=1
484,TRUE,Q9NPQ8	RIC8A_HUMAN,270.19598,12,,540.82947,9120.943,4248.236,1234.1205,,258.106,1215.8765,7261.695,7468.2866,413.06424,1124.2878,12,,3,18,11,7,1,4,6,15,15,2,4,Oxidation (M); Carbamidomethylation,59709.508,Synembryn-A OS=Homo sapiens OX=9606 GN=RIC8A PE=1 SV=3
587,TRUE,O15427	MOT4_HUMAN,239.64413,11,57612.285,101233.81,99603.164,72617.68,10162.6455,225.59587,5622.181,10505.981,176897.6,160721.52,91442.77,100772.99,11,16,26,13,21,10,4,12,11,35,24,17,29,Oxidation (M),49469.38,Monocarboxylate transporter 4 OS=Homo sapiens OX=9606 GN=SLC16A3 PE=1 SV=1
1011,TRUE,P61764	STXB1_HUMAN,144.92279,5,,,1055.1267,337.21762,171.1005,,,,564.62756,806.1333,,,5,2,1,4,5,2,,,1,2,2,,,Carbamidomethylation,67568.71,Syntaxin-binding protein 1 OS=Homo sapiens OX=9606 GN=STXBP1 PE=1 SV=1
719,TRUE,P46109	CRKL_HUMAN,213.54237,8,100.82671,648.36237,6866.2744,3610.6196,,,775.09735,,10047.618,14063.042,1267.3807,1128.2698,8,1,1,13,9,4,1,1,2,11,10,4,1,Carbamidomethylation; Oxidation (M),33776.984,Crk-like protein OS=Homo sapiens OX=9606 GN=CRKL PE=1 SV=1
529,TRUE,P84077	ARF1_HUMAN,263.4842,8,44775.797,90973.914,133141.53,98951.55,51791.77,8760.718,33722.547,60741.24,118827.414,124132.586,44405.88,40941.9,4,37,43,50,48,34,21,28,36,37,33,32,30,Oxidation (M),20696.764,ADP-ribosylation factor 1 OS=Homo sapiens OX=9606 GN=ARF1 PE=1 SV=2
586,TRUE,Q96FQ6	S10AG_HUMAN,257.26382,9,32375.39,73441.19,226856.95,182615.94,79436.53,25438.863,59707.35,55636.188,123116.305,122825.06,38312.336,43162.36,9,17,25,28,27,24,17,17,25,30,33,17,14,Oxidation (M),11801.392,Protein S100-A16 OS=Homo sapiens OX=9606 GN=S100A16 PE=1 SV=1
1257,TRUE,Q86WV6	STING_HUMAN,108.91095,3,242.47348,670.82117,1474.3376,1498.0481,,,,,,,,,3,1,1,3,3,,,,,,,,,Carbamidomethylation,42192.59,Stimulator of interferon genes protein OS=Homo sapiens OX=9606 GN=STING1 PE=1 SV=1
1086,TRUE,Q9BXB1	LGR4_HUMAN,98.18164,4,,,311.8391,,557.71497,,139.64627,554.5477,,185.13345,245.58015,230.46617,4,1,2,2,1,1,,1,4,,1,3,3,,104475.11,Leucine-rich repeat-containing G-protein coupled receptor 4 OS=Homo sapiens OX=9606 GN=LGR4 PE=1 SV=2
436,TRUE,O43278	SPIT1_HUMAN,242.2262,14,34185.59,52447.984,62052.984,48398.164,67421.97,15389.033,53729.24,72994.914,70275.25,60778.55,43913.26,54627.32,14,20,16,18,23,17,13,24,22,23,24,18,19,Carbamidomethylation; Oxidation (M),58398.008,Kunitz-type protease inhibitor 1 OS=Homo sapiens OX=9606 GN=SPINT1 PE=1 SV=2
86,FALSE,Q8NFP9	NBEA_HUMAN,161.81046,4,,406.38647,2273.367,2011.3093,692.4929,,,1103.8383,1783.3169,563.13873,,,4,1,1,5,5,2,1,1,1,4,5,1,,Carbamidomethylation,327821.56,Neurobeachin OS=Homo sapiens OX=9606 GN=NBEA PE=1 SV=3
1368,TRUE,Q9HBW0	LPAR2_HUMAN,72.84461,2,,,565.7946,310.4934,432.9137,,603.5044,1058.3,1616.5537,1584.5546,,,2,,,1,1,1,2,2,2,2,3,,,,39084.2,Lysophosphatidic acid receptor 2 OS=Homo sapiens OX=9606 GN=LPAR2 PE=1 SV=2
1354,TRUE,O43665	RGS10_HUMAN,67.3412,2,,,,,,,,,513.88635,,,,2,,,1,,,,,,2,1,,,,21209.918,Regulator of G-protein signaling 10 OS=Homo sapiens OX=9606 GN=RGS10 PE=1 SV=3
217,TRUE,Q92888	ARHG1_HUMAN,315.7106,22,276.6133,2545.0095,16348.862,9763.113,7164.6274,102.31085,2354.3457,7153.4536,17789.959,17469.121,2083.377,2431.1458,22,6,6,31,29,14,3,7,12,22,28,5,6,Oxidation (M); Carbamidomethylation,102435.3,Rho guanine nucleotide exchange factor 1 OS=Homo sapiens OX=9606 GN=ARHGEF1 PE=1 SV=2
541,FALSE,Q01484	ANK2_HUMAN,89.673096,2,,,,,213.40971,,105.41145,,,,,,2,,,,,2,1,1,2,1,1,,1,,433714.66,Ankyrin-2 OS=Homo sapiens OX=9606 GN=ANK2 PE=1 SV=4
1196,TRUE,Q04771	ACVR1_HUMAN,106.10947,3,655.11475,1227.4661,,,1274.5142,,1432.0835,2410.6636,918.3505,888.94543,1583.8782,692.0153,3,2,3,,,6,,4,3,1,1,2,3,Oxidation (M),57152.848,Activin receptor type-1 OS=Homo sapiens OX=9606 GN=ACVR1 PE=1 SV=1
1112,TRUE,O00212	RHOD_HUMAN,104.50452,4,,,1566.5767,1094.8925,290.1765,,,,603.0828,902.6179,183.66267,,4,,,5,5,2,,1,,4,2,1,,Carbamidomethylation; Oxidation (M),23412.852,Rho-related GTP-binding protein RhoD OS=Homo sapiens OX=9606 GN=RHOD PE=1 SV=2
1226,TRUE,P02649	APOE_HUMAN,88.80252,3,,,,,,,,145.95221,455.7821,437.15067,,,3,,,,,,,2,3,1,4,,,,36154.08,Apolipoprotein E OS=Homo sapiens OX=9606 GN=APOE PE=1 SV=1
562,TRUE,Q15691	MARE1_HUMAN,293.16824,12,,2134.1191,28126.441,17721.36,4366.9614,,2562.0332,6016.2363,30461.105,26123.438,684.16473,1948.998,12,3,7,21,24,7,7,8,9,18,18,6,6,Acetylation (N-term); Oxidation (M); Carbamidomethylation,29999.076,Microtubule-associated protein RP/EB family member 1 OS=Homo sapiens OX=9606 GN=MAPRE1 PE=1 SV=3
1055,TRUE,Q12979	ABR_HUMAN,139.60802,5,,,,,306.18176,,,,,394.66272,,,4,2,1,1,2,2,,1,2,1,3,2,1,,97597.836,Active breakpoint cluster region-related protein OS=Homo sapiens OX=9606 GN=ABR PE=1 SV=2
1018,TRUE,Q86SJ2	AMGO2_HUMAN,169.2403,5,,199.80765,,,240.70808,,,948.4708,,,,,5,1,2,,,3,1,2,5,2,,,2,Oxidation (M),57933.89,Amphoterin-induced protein 2 OS=Homo sapiens OX=9606 GN=AMIGO2 PE=1 SV=1
351,TRUE,Q8NC51	PAIRB_HUMAN,310.70996,15,8997.848,24930.197,49441.215,28777.473,20513.44,1225.6221,12383.087,31613.506,87659.21,86361.52,22168.871,34627.566,15,21,24,30,26,19,12,21,29,38,28,24,26,Oxidation (M); Carbamidomethylation,44965.383,Plasminogen activator inhibitor 1 RNA-binding protein OS=Homo sapiens OX=9606 GN=SERBP1 PE=1 SV=2
872,TRUE,O75251	NDUS7_HUMAN,182.43428,5,1452.26,3128.9365,23144.09,11473.627,19167.68,3916.5903,4656.091,9556.794,18645.02,25434.69,1905.8784,1727.9746,5,4,5,11,11,12,11,4,9,12,11,3,6,Oxidation (M),23563.504,"NADH dehydrogenase [ubiquinone] iron-sulfur protein 7, mitochondrial OS=Homo sapiens OX=9606 GN=NDUFS7 PE=1 SV=3"
1172,TRUE,Q8NI77	KI18A_HUMAN,116.93141,3,175.5378,249.7197,,,,,,,1724.208,2629.1777,812.9505,268.0404,3,2,2,,1,,,,,3,3,2,1,,102280.99,Kinesin-like protein KIF18A OS=Homo sapiens OX=9606 GN=KIF18A PE=1 SV=2
903,TRUE,P22681	CBL_HUMAN,168.60266,6,299.37552,1683.0868,552.7402,,113.576866,,209.66437,634.0164,1847.2874,875.61584,1965.4155,1667.254,6,3,7,1,3,3,,2,3,6,5,7,5,Oxidation (M),99632.78,E3 ubiquitin-protein ligase CBL OS=Homo sapiens OX=9606 GN=CBL PE=1 SV=2
648,TRUE,P30533	AMRP_HUMAN,231.79903,10,,900.47217,17721.215,11439.798,8092.8477,583.5001,3774.7117,8177.743,23582.893,18196.174,489.55634,493.26718,10,2,8,11,9,7,6,9,6,13,11,6,6,,41465.992,Alpha-2-macroglobulin receptor-associated protein OS=Homo sapiens OX=9606 GN=LRPAP1 PE=1 SV=1
99,TRUE,P20020	AT2B1_HUMAN,375.57852,34,396.8813,1073.9227,7590.1826,5070.7725,8068.889,,5958.637,10048.543,26029.725,25039.514,2880.843,5050.92,19,38,28,57,52,50,19,40,42,56,62,38,41,Oxidation (M); Carbamidomethylation,134684.77,Plasma membrane calcium-transporting ATPase 1 OS=Homo sapiens OX=9606 GN=ATP2B1 PE=1 SV=4
7,TRUE,Q8IVF2	AHNK2_HUMAN,538.50336,142,41905.09,89888.53,339620.1,267789.47,115640.22,13165.302,64779.41,124637.97,408975.25,508825.88,72275.7,68687.85,142,126,127,212,211,147,87,100,149,252,251,112,109,Oxidation (M); Carbamidomethylation; Acetylation (N-term),616629.3,Protein AHNAK2 OS=Homo sapiens OX=9606 GN=AHNAK2 PE=1 SV=2
988,TRUE,Q96NE9	FRMD6_HUMAN,184.29343,5,648.30457,2014.1625,1527.6918,1069.9053,2454.9688,,1682.832,3255.7676,2249.9731,2199.4155,1092.3197,1843.6976,5,5,7,4,5,3,,5,6,1,3,2,4,,72043.94,FERM domain-containing protein 6 OS=Homo sapiens OX=9606 GN=FRMD6 PE=1 SV=1
1110,TRUE,Q9UGH3	S23A2_HUMAN,144.38307,4,,,,96.48593,324.46558,,392.24738,1127.7413,182.62651,,,,4,,,1,1,4,3,4,4,3,1,2,,Oxidation (M),70336.984,Solute carrier family 23 member 2 OS=Homo sapiens OX=9606 GN=SLC23A2 PE=1 SV=1
145,TRUE,Q9Y446	PKP3_HUMAN,386.6519,33,46874.03,90003.34,97456.86,61976.68,37017.133,2530.8767,27251.205,44084.484,95453.24,111652.14,44819.508,57519.586,33,41,50,56,49,29,17,32,31,54,50,36,42,Carbamidomethylation; Oxidation (M); Acetylation (N-term),87082.15,Plakophilin-3 OS=Homo sapiens OX=9606 GN=PKP3 PE=1 SV=1
1343,TRUE,Q9UBR2	CATZ_HUMAN,94.54636,2,,,,1683.6104,,117.9176,,271.7968,829.70935,,,,2,,,1,1,2,1,,1,2,,,1,,33867.926,Cathepsin Z OS=Homo sapiens OX=9606 GN=CTSZ PE=1 SV=1
446,TRUE,Q9UHQ9	NB5R1_HUMAN,277.23438,12,2880.7678,7665.1953,58931.65,45398.543,9063.32,656.1261,,734.43756,16216.932,12855.818,208.5459,402.27618,12,10,10,29,23,11,7,1,2,11,11,3,4,Carbamidomethylation; Oxidation (M),34094.84,NADH-cytochrome b5 reductase 1 OS=Homo sapiens OX=9606 GN=CYB5R1 PE=1 SV=1
466,TRUE,Q99996	AKAP9_HUMAN,223.03926,14,,102.75206,,,,,,282.69965,6882.714,3973.019,,177.05966,14,1,1,1,,,,,2,20,14,1,1,Acetylation (N-term),452987.2,A-kinase anchor protein 9 OS=Homo sapiens OX=9606 GN=AKAP9 PE=1 SV=4
1034,TRUE,O95219	SNX4_HUMAN,143.98572,5,,,1288.2151,930.0446,,,,157.8713,1842.4208,1840.6482,,,5,,,3,1,2,,,1,5,4,,,,51908.824,Sorting nexin-4 OS=Homo sapiens OX=9606 GN=SNX4 PE=1 SV=1
769,TRUE,Q13433	S39A6_HUMAN,182.62257,8,3739.3142,5720.983,2314.8193,1728.577,4553.8467,1045.6951,4191.0376,9190.334,3556.6545,3162.6934,4981.6143,8188.3525,8,5,8,2,4,8,2,4,10,8,5,6,9,,85046.79,Zinc transporter ZIP6 OS=Homo sapiens OX=9606 GN=SLC39A6 PE=1 SV=3
584,TRUE,Q99541	PLIN2_HUMAN,185.37038,9,,,3093.824,1361.7673,,,,,,,,,9,,,8,10,,,,,1,1,,,Carbamidomethylation; Oxidation (M),48075.418,Perilipin-2 OS=Homo sapiens OX=9606 GN=PLIN2 PE=1 SV=2
182,TRUE,Q9NZN4	EHD2_HUMAN,319.84625,21,222.25546,3258.8708,16037.864,8502.585,11949.977,352.57132,4837.7637,10026.269,14529.941,17390.041,579.688,1689.8453,17,10,18,42,31,34,18,27,27,34,32,9,16,Oxidation (M); Carbamidomethylation,61161.395,EH domain-containing protein 2 OS=Homo sapiens OX=9606 GN=EHD2 PE=1 SV=2
157,TRUE,Q9UJZ1	STML2_HUMAN,410.12198,27,4878.595,16397.383,101662.75,73425.94,299742.8,62422.906,144550.83,269737.3,301909.4,307080.53,19559.088,27319.967,27,9,12,38,34,61,41,46,59,64,71,17,20,Oxidation (M); Carbamidomethylation,38534.062,"Stomatin-like protein 2, mitochondrial OS=Homo sapiens OX=9606 GN=STOML2 PE=1 SV=1"
1004,TRUE,Q969G5	CAVN3_HUMAN,140.54219,4,,468.64502,6211.8296,3489.3667,,,,,2454.7742,4265.5024,,,4,1,4,6,5,,,,1,3,5,,1,Oxidation (M),27701.162,Caveolae-associated protein 3 OS=Homo sapiens OX=9606 GN=CAVIN3 PE=1 SV=3
725,TRUE,Q92930	RAB8B_HUMAN,206.56587,6,,,3897.4487,2609.2366,84.653984,,208.0993,635.3544,2197.9048,2560.9797,,,3,12,13,29,33,14,9,7,15,17,21,12,7,Oxidation (M),23584.09,Ras-related protein Rab-8B OS=Homo sapiens OX=9606 GN=RAB8B PE=1 SV=2
114,TRUE,P29323	EPHB2_HUMAN,393.9209,29,15474.492,39647.492,12247.033,9917.215,32763.748,3238.2078,44796.707,71611.2,68330.805,72789.49,62121.67,71159.4,22,42,55,32,27,42,26,54,58,45,52,52,74,Oxidation (M); Carbamidomethylation,117492.664,Ephrin type-B receptor 2 OS=Homo sapiens OX=9606 GN=EPHB2 PE=1 SV=5
1036,TRUE,P25098	ARBK1_HUMAN,122.40487,5,,,637.84534,564.84753,,,,,1413.9211,,,,5,,,3,3,,,,,5,1,,,Carbamidomethylation,79573.6,Beta-adrenergic receptor kinase 1 OS=Homo sapiens OX=9606 GN=GRK2 PE=1 SV=2
54,TRUE,P53396	ACLY_HUMAN,466.41406,42,107810.32,164124.3,447610.28,346990.2,120964.28,18104.348,111758.24,184251.81,428953.62,455772.9,133712.89,167703.14,42,90,103,163,147,89,50,90,85,158,161,102,108,Oxidation (M); Carbamidomethylation,120839.22,ATP-citrate synthase OS=Homo sapiens OX=9606 GN=ACLY PE=1 SV=3
215,TRUE,P43490	NAMPT_HUMAN,427.3544,25,35779.527,79533.19,150237.4,124243.15,30229.662,1723.8015,33352.793,62654.074,207164.73,203928.5,69310.83,96210.87,25,36,49,69,68,33,25,38,40,65,75,51,63,Carbamidomethylation; Oxidation (M),55521.156,Nicotinamide phosphoribosyltransferase OS=Homo sapiens OX=9606 GN=NAMPT PE=1 SV=1
573,TRUE,Q86VI3	IQGA3_HUMAN,194.61401,9,,,610.9339,180.11142,,,,,133.19958,,,,7,4,4,13,5,2,2,3,4,5,4,2,3,Acetylation (N-term); Oxidation (M),184698.81,Ras GTPase-activating-like protein IQGAP3 OS=Homo sapiens OX=9606 GN=IQGAP3 PE=1 SV=2
533,TRUE,Q9Y5X1	SNX9_HUMAN,299.9582,12,6104.4214,16319.017,4374.313,3386.6775,1294.1643,,1810.0049,3541.9458,9352.473,10383.269,6888.3486,9144.1455,12,16,17,11,7,7,1,8,9,16,10,12,20,,66591.65,Sorting nexin-9 OS=Homo sapiens OX=9606 GN=SNX9 PE=1 SV=1
472,TRUE,Q9BXS5	AP1M1_HUMAN,235.2446,12,510.08478,1352.3379,18885.45,13020.539,4771.789,,3173.6182,6758.1504,25106.275,26663.895,680.14307,1460.381,12,4,5,16,15,14,3,13,12,19,19,3,5,Oxidation (M),48586.895,AP-1 complex subunit mu-1 OS=Homo sapiens OX=9606 GN=AP1M1 PE=1 SV=3
327,TRUE,P39656	OST48_HUMAN,380.52823,18,4602.4155,10375.856,294573.4,247012.28,130485.61,29802.273,26631.441,45397.727,234334.9,233288.2,2377.3672,2538.3652,18,7,16,53,47,37,26,21,21,38,45,8,5,Carbamidomethylation; Oxidation (M),50800.83,Dolichyl-diphosphooligosaccharide--protein glycosyltransferase 48 kDa subunit OS=Homo sapiens OX=9606 GN=DDOST PE=1 SV=4
36,FALSE,P13637	AT1A3_HUMAN,401.204,26,71250.01,118267.3,245245.66,177277.6,384208.5,97424.78,314301.56,395188.62,364246.34,364112.28,113260.96,166193.12,12,66,82,89,89,113,78,113,134,123,122,84,97,Oxidation (M); Carbamidomethylation,111748.54,Sodium/potassium-transporting ATPase subunit alpha-3 OS=Homo sapiens OX=9606 GN=ATP1A3 PE=1 SV=3
748,TRUE,Q86YM7	HOME1_HUMAN,188.64278,8,,,895.5507,390.6173,,,,318.52826,2419.1667,1057.6794,,,7,,,4,4,2,,1,2,7,6,,,,40276.8,Homer protein homolog 1 OS=Homo sapiens OX=9606 GN=HOMER1 PE=1 SV=2
952,TRUE,Q9Y5Y0	FLVC1_HUMAN,185.19131,5,242.23026,877.6078,813.2573,,6816.7515,528.03485,3579.0508,9399.766,270.55325,1072.1222,974.4544,1969.6343,5,5,7,1,1,12,6,9,7,2,1,6,10,Acetylation (N-term),59862.887,Feline leukemia virus subgroup C receptor-related protein 1 OS=Homo sapiens OX=9606 GN=FLVCR1 PE=1 SV=1
652,FALSE,A6NIZ1	RP1BL_HUMAN,228.6203,7,,,15713.284,9371.107,,,,,9030.1,9297.327,,,3,4,7,24,20,8,8,7,5,20,22,4,5,Carbamidomethylation; Oxidation (M),20924.86,Ras-related protein Rap-1b-like protein OS=Homo sapiens OX=9606 PE=2 SV=1
736,TRUE,O15455	TLR3_HUMAN,231.4408,9,,,2503.834,1272.0789,2561.44,,,,132.12877,335.9372,,,9,,,12,9,12,2,,,2,3,,,,103828.62,Toll-like receptor 3 OS=Homo sapiens OX=9606 GN=TLR3 PE=1 SV=1
640,TRUE,P31431	SDC4_HUMAN,234.0732,10,9269.243,18886.033,24080.162,19610.248,38494.98,11853.069,22108.168,31131.855,26679.05,17375.275,5583.689,10679.387,10,16,13,21,14,25,15,16,15,12,17,9,9,Oxidation (M),21641.555,Syndecan-4 OS=Homo sapiens OX=9606 GN=SDC4 PE=1 SV=2
1278,TRUE,Q9NWQ8	PHAG1_HUMAN,126.15755,3,,316.03574,206.95316,,173.78934,,,,,,,,3,1,3,3,1,3,1,,,,,,,Oxidation (M),46980.562,Phosphoprotein associated with glycosphingolipid-enriched microdomains 1 OS=Homo sapiens OX=9606 GN=PAG1 PE=1 SV=2
16,TRUE,Q9NZM1	MYOF_HUMAN,542.6926,115,84110.4,180125.03,722182.44,550566.3,211960.22,29625.262,108350.9,234683.89,680234.5,713114.5,106476.1,136050.6,115,119,151,268,234,142,114,136,144,264,256,121,116,Carbamidomethylation; Oxidation (M); Acetylation (N-term),234708.72,Myoferlin OS=Homo sapiens OX=9606 GN=MYOF PE=1 SV=1
482,TRUE,P09758	TACD2_HUMAN,321.99472,13,11994.205,24326.592,350887.06,267940.3,445317.8,106881.63,271252.34,320784.72,275473.5,258495.92,8680.097,11519.132,13,7,7,48,52,64,43,50,42,42,40,7,7,Oxidation (M); Carbamidomethylation,35709.39,Tumor-associated calcium signal transducer 2 OS=Homo sapiens OX=9606 GN=TACSTD2 PE=1 SV=3
833,TRUE,O00273	DFFA_HUMAN,223.90736,7,,137.21915,4287.292,2512.7102,1074.8348,,716.7466,4147.6616,10356.6045,10135.451,,,7,,1,8,7,2,2,4,8,10,9,,1,Carbamidomethylation,36521.906,DNA fragmentation factor subunit alpha OS=Homo sapiens OX=9606 GN=DFFA PE=1 SV=1
704,TRUE,P50479	PDLI4_HUMAN,172.36855,7,1767.9641,3866.8262,3236.2983,2110.3672,2060.6738,,1307.4976,1834.0807,3051.0835,6528.2783,813.3269,1613.6567,7,5,7,5,4,4,2,2,6,7,6,7,8,Oxidation (M),35397.996,PDZ and LIM domain protein 4 OS=Homo sapiens OX=9606 GN=PDLIM4 PE=1 SV=2
711,TRUE,O95361	TRI16_HUMAN,191.10037,8,,,,199.61758,187.49863,,,627.6,2032.3398,1089.9955,,,8,,,3,4,3,,3,5,8,5,1,,Oxidation (M),63955.16,Tripartite motif-containing protein 16 OS=Homo sapiens OX=9606 GN=TRIM16 PE=1 SV=3
1008,TRUE,Q7KYR7	BT2A1_HUMAN,147.37294,4,,1448.8986,412.05103,,1205.3676,,310.73773,,,,926.2848,347.4939,4,,3,1,,2,1,2,2,,2,2,1,Oxidation (M),59632.56,Butyrophilin subfamily 2 member A1 OS=Homo sapiens OX=9606 GN=BTN2A1 PE=1 SV=3
480,TRUE,P49757	NUMB_HUMAN,221.3622,12,4222.9736,7605.7837,12859.805,7515.686,9520.268,1327.0708,1818.0402,7971.0186,8057.6367,5274.6714,3940.9648,4182.2964,12,13,16,18,17,17,4,10,13,14,13,14,16,Carbamidomethylation; Oxidation (M),70803.8,Protein numb homolog OS=Homo sapiens OX=9606 GN=NUMB PE=1 SV=2
300,TRUE,P80303	NUCB2_HUMAN,303.46497,17,,457.79517,27278.28,21813.945,2972.0383,,171.45651,798.16943,15764.099,18422.941,,,17,,3,30,29,10,4,6,2,18,22,2,1,Oxidation (M),50222.727,Nucleobindin-2 OS=Homo sapiens OX=9606 GN=NUCB2 PE=1 SV=3
1400,TRUE,P62166	NCS1_HUMAN,100.46822,2,,233.142,,534.42865,173.84415,,133.60127,,2149.0679,2394.7378,,,2,1,1,,1,1,1,1,,2,3,,1,,21878.715,Neuronal calcium sensor 1 OS=Homo sapiens OX=9606 GN=NCS1 PE=1 SV=2
498,TRUE,P84085	ARF5_HUMAN,257.27835,8,6889.9053,5817.525,28773.81,22668.102,5412.9937,,4181.582,4252.6133,23564.043,28533.553,7999.9614,8760.507,4,30,28,33,33,19,8,15,18,30,25,28,25,Oxidation (M); Carbamidomethylation,20529.65,ADP-ribosylation factor 5 OS=Homo sapiens OX=9606 GN=ARF5 PE=1 SV=2
72,TRUE,O43795	MYO1B_HUMAN,435.3006,46,59264.973,155071.12,361739.66,298745.66,203326.72,43926.348,109063.64,166894.31,277147,280475.88,58807.18,82149.555,43,66,70,135,111,100,54,84,73,97,113,47,56,Acetylation (N-term); Carbamidomethylation; Oxidation (M),131985.03,Unconventional myosin-Ib OS=Homo sapiens OX=9606 GN=MYO1B PE=1 SV=3
919,TRUE,Q12986	NFX1_HUMAN,180.76453,5,,149.63577,,,,,,,390.0082,542.271,451.18076,1176.554,5,,3,2,2,,,,2,5,4,3,6,Oxidation (M),124394.58,Transcriptional repressor NF-X1 OS=Homo sapiens OX=9606 GN=NFX1 PE=1 SV=2
761,FALSE,P52569	CTR2_HUMAN,106.86632,2,5344.962,7357.953,20979.062,15727.198,74948.44,17517.904,32566.115,40300.62,13112.051,17475.35,4643.3735,3693.4062,2,4,2,5,4,9,7,4,5,4,4,4,3,Oxidation (M),71673.01,Cationic amino acid transporter 2 OS=Homo sapiens OX=9606 GN=SLC7A2 PE=1 SV=2
1144,TRUE,P36894	BMR1A_HUMAN,178.26883,4,,954.3436,340.51483,184.0754,1344.0295,,192.0802,1262.731,,,181.28374,592.3486,4,,2,3,2,5,,2,4,2,3,2,2,,60197.496,Bone morphogenetic protein receptor type-1A OS=Homo sapiens OX=9606 GN=BMPR1A PE=1 SV=2
1369,TRUE,O60784	TOM1_HUMAN,93.34279,2,,,263.83783,,,,,,235.07826,,,,2,,,1,1,1,,,,1,,,,,53818.434,Target of Myb protein 1 OS=Homo sapiens OX=9606 GN=TOM1 PE=1 SV=2
344,TRUE,P12931	SRC_HUMAN,306.9094,15,1311.5411,3293.021,9520.602,7182.565,11441.88,1516.5146,4139.355,5471.0693,6824.746,4516.086,1066.3348,1010.8712,12,17,19,21,20,28,13,21,24,15,18,10,12,Carbamidomethylation; Oxidation (M),59834.758,Proto-oncogene tyrosine-protein kinase Src OS=Homo sapiens OX=9606 GN=SRC PE=1 SV=3
87,TRUE,P15144	AMPN_HUMAN,399.29785,38,,,,,224.85149,,196006.64,240573.36,201768.02,177750.38,132443.6,169705.16,38,,,,,1,,91,105,87,79,79,92,Oxidation (M); Carbamidomethylation,109539.59,Aminopeptidase N OS=Homo sapiens OX=9606 GN=ANPEP PE=1 SV=4
980,TRUE,P43405	KSYK_HUMAN,143.08784,4,,485.47742,1322.6228,576.121,1049.305,,485.13574,1135.0983,1962.6027,1637.8752,75.81344,545.73956,4,4,5,7,4,6,1,2,4,6,3,2,2,Oxidation (M),72066.2,Tyrosine-protein kinase SYK OS=Homo sapiens OX=9606 GN=SYK PE=1 SV=1
865,TRUE,Q14232	EI2BA_HUMAN,226.16696,7,,940.27045,3637.0293,4012.1777,3418.1616,,1682.8958,3530.3713,7746.0127,7606.4854,,438.37323,7,,4,11,4,8,5,7,6,8,7,,1,Oxidation (M); Carbamidomethylation,33712.2,Translation initiation factor eIF-2B subunit alpha OS=Homo sapiens OX=9606 GN=EIF2B1 PE=1 SV=1
1281,TRUE,Q9H9L4	KANL2_HUMAN,132.75125,3,,135.25325,,,,,,,130.70724,,,,3,,1,1,,,,,,3,1,,1,,55042.4,KAT8 regulatory NSL complex subunit 2 OS=Homo sapiens OX=9606 GN=KANSL2 PE=1 SV=3
454,TRUE,Q9UP95	S12A4_HUMAN,273.5472,14,451.97464,944.198,3718.4668,2790.884,7606.4775,1030.2966,1546.7241,3354.4731,1890.5032,3485.8223,244.72626,673.27277,10,6,5,8,7,18,6,6,7,6,7,1,4,Carbamidomethylation; Oxidation (M),120649.88,Solute carrier family 12 member 4 OS=Homo sapiens OX=9606 GN=SLC12A4 PE=1 SV=2
1049,TRUE,O95864	FADS2_HUMAN,182.56287,5,,311.98776,618.49866,320.54803,,,,,3322.9536,5722.5815,713.80084,525.80347,5,,2,1,1,,,,,4,6,2,2,,52259.37,Acyl-CoA 6-desaturase OS=Homo sapiens OX=9606 GN=FADS2 PE=1 SV=1
139,TRUE,Q12965	MYO1E_HUMAN,337.96707,33,4922.003,10117.712,30309.5,21095.219,17094.365,770.0025,11755.903,20627.098,29023.416,34505.08,7372.451,9805.76,32,16,18,46,37,28,15,26,26,38,39,15,16,Oxidation (M); Carbamidomethylation; Acetylation (N-term),127061.89,Unconventional myosin-Ie OS=Homo sapiens OX=9606 GN=MYO1E PE=1 SV=2
837,TRUE,Q9BUL8	PDC10_HUMAN,181.3028,6,,,8334.515,6243.4614,4052.1,,,218.47874,6457.3076,5613.207,,,6,,1,6,8,4,1,1,2,3,5,,1,Oxidation (M),24701.566,Programmed cell death protein 10 OS=Homo sapiens OX=9606 GN=PDCD10 PE=1 SV=1
280,TRUE,Q00325	MPCP_HUMAN,285.64432,14,31402.334,48347.043,345475.56,299322.34,45982.234,15803.823,27258.123,39442.656,302637.8,306259.75,37089.715,42203.773,14,14,14,61,55,15,13,12,14,47,52,18,17,Oxidation (M); Carbamidomethylation,40094.86,"Phosphate carrier protein, mitochondrial OS=Homo sapiens OX=9606 GN=SLC25A3 PE=1 SV=2"
889,TRUE,Q9UBI6	GBG12_HUMAN,181.5166,5,,,17576.215,9955.605,8286.513,,4614.9062,8095.746,10324.679,13143.185,,239.59674,5,3,1,12,8,8,8,7,8,11,10,2,1,Oxidation (M); Carbamidomethylation,8006.2163,Guanine nucleotide-binding protein G(I)/G(S)/G(O) subunit gamma-12 OS=Homo sapiens OX=9606 GN=GNG12 PE=1 SV=3
947,TRUE,Q3V6T2	GRDN_HUMAN,146.14038,6,,856.81226,,158.85493,,,,,981.62976,893.0788,,,6,,1,,3,,,,,3,5,,,,216041.53,Girdin OS=Homo sapiens OX=9606 GN=CCDC88A PE=1 SV=2
196,TRUE,P07384	CAN1_HUMAN,338.26517,22,11382.6045,23604.176,71822.68,40645.32,27933.414,2916.2917,19582.188,27607.75,50564.516,58790.332,7787.2573,11630.444,22,21,27,45,31,27,19,24,24,26,29,17,13,Oxidation (M); Carbamidomethylation,81890.05,Calpain-1 catalytic subunit OS=Homo sapiens OX=9606 GN=CAPN1 PE=1 SV=1
120,TRUE,Q15046	SYK_HUMAN,365.06207,30,29989.195,82363.875,109553.73,74179.33,37029.45,3931.4194,17297.43,40882.82,148255.5,148223.66,5229.2183,10121.609,30,43,55,53,47,34,10,30,34,63,59,16,17,Oxidation (M); Carbamidomethylation,68048.06,Lysine--tRNA ligase OS=Homo sapiens OX=9606 GN=KARS1 PE=1 SV=3
974,TRUE,Q9UBB4	ATX10_HUMAN,153.4968,5,,,1299.9022,603.4396,330.04407,,274.30316,,3284.3408,3427.2705,,147.00546,5,1,,4,2,3,,3,2,3,3,1,3,Oxidation (M),53488.746,Ataxin-10 OS=Homo sapiens OX=9606 GN=ATXN10 PE=1 SV=1
986,TRUE,Q9H9H4	VP37B_HUMAN,193.47215,4,389.43997,2362.7747,1308.5587,396.8329,375.7438,,309.11572,437.70642,2329.3186,3327.3105,389.51105,558.069,4,4,7,6,6,5,1,1,5,8,8,5,4,Oxidation (M),31307.205,Vacuolar protein sorting-associated protein 37B OS=Homo sapiens OX=9606 GN=VPS37B PE=1 SV=1
108,TRUE,P55196	AFAD_HUMAN,388.64215,37,1592.8628,7801.38,7634.717,5697.186,21212.97,630.08484,12340.53,28891.395,14539.295,12800.784,4305.283,7073.2617,37,16,20,29,20,31,16,40,39,28,31,18,21,Oxidation (M); Carbamidomethylation,206804.22,Afadin OS=Homo sapiens OX=9606 GN=AFDN PE=1 SV=3
475,TRUE,P09543	CN37_HUMAN,273.72903,13,7259.834,16733.826,20623.8,8272.748,17031.033,659.09564,3067.4182,9553.893,9459.881,6789.5967,4712.7324,7083.465,13,14,16,16,12,20,11,8,8,9,7,5,10,Oxidation (M),47578.625,"2',3'-cyclic-nucleotide 3'-phosphodiesterase OS=Homo sapiens OX=9606 GN=CNP PE=1 SV=2"
1269,FALSE,Q8TDB8	GTR14_HUMAN,116.93714,2,,,,,870.0951,,,211.4391,,,,,2,,,2,2,3,1,1,1,,,,,Oxidation (M),56320.11,"Solute carrier family 2, facilitated glucose transporter member 14 OS=Homo sapiens OX=9606 GN=SLC2A14 PE=1 SV=1"
1387,TRUE,Q9Y3S1	WNK2_HUMAN,91.36929,2,230.98923,533.7096,892.1513,1094.6624,209.64929,,313.76437,228.25977,,,153.23706,494.75464,2,1,1,1,2,1,,1,4,,,2,1,Carbamidomethylation,242676.1,Serine/threonine-protein kinase WNK2 OS=Homo sapiens OX=9606 GN=WNK2 PE=1 SV=4
171,TRUE,P50748	KNTC1_HUMAN,335.62747,32,,,7236.4404,14366.898,,,125.945305,1520.7738,16575.592,27625.305,272.1848,1386.9436,32,,4,20,22,1,,8,7,34,34,6,5,Carbamidomethylation,250748.53,Kinetochore-associated protein 1 OS=Homo sapiens OX=9606 GN=KNTC1 PE=1 SV=1
88,TRUE,P26038	MOES_HUMAN,371.29483,34,,,65830.23,33176.3,8665.749,,7103.2866,21024.281,178329.75,106411.62,,,26,2,3,70,53,29,17,34,35,83,75,5,6,Oxidation (M); Carbamidomethylation,67820.04,Moesin OS=Homo sapiens OX=9606 GN=MSN PE=1 SV=3
1419,TRUE,Q12929	EPS8_HUMAN,54.295128,2,,,,,,,1224.6388,628.6409,,,,,2,,,,,,,1,2,,,,,Oxidation (M),91881.516,Epidermal growth factor receptor kinase substrate 8 OS=Homo sapiens OX=9606 GN=EPS8 PE=1 SV=1
1247,TRUE,P30679	GNA15_HUMAN,102.41254,3,,325.46143,,,858.18555,,307.58237,944.7827,905.0423,816.20917,120.38246,,3,1,1,,,3,,1,2,2,1,1,1,,43568.027,Guanine nucleotide-binding protein subunit alpha-15 OS=Homo sapiens OX=9606 GN=GNA15 PE=1 SV=2
856,TRUE,Q9H490	PIGU_HUMAN,212.50218,6,699.4264,4192.3687,15379.011,7248.26,1255.1869,,,638.25073,8495.934,7115.5483,,,6,3,8,11,12,3,,2,2,14,14,1,1,Oxidation (M); Carbamidomethylation,50051.812,Phosphatidylinositol glycan anchor biosynthesis class U protein OS=Homo sapiens OX=9606 GN=PIGU PE=1 SV=3
900,TRUE,Q9UN37	VPS4A_HUMAN,167.33858,6,,,584.2624,262.7849,,,,999.65924,11047.367,5875.082,,,6,,,2,3,,1,,1,6,6,,2,Carbamidomethylation,48897.87,Vacuolar protein sorting-associated protein 4A OS=Homo sapiens OX=9606 GN=VPS4A PE=1 SV=1
656,TRUE,Q07021	C1QBP_HUMAN,294.569,9,2408.662,4773.582,99423.56,75175.85,42231.668,11089.144,20937.945,27134.098,150589.61,148857.39,3279.4788,5346.3315,9,4,3,26,18,20,12,9,14,37,34,2,3,Carbamidomethylation; Oxidation (M),31362.236,"Complement component 1 Q subcomponent-binding protein, mitochondrial OS=Homo sapiens OX=9606 GN=C1QBP PE=1 SV=1"
1006,TRUE,P16591	FER_HUMAN,185.81337,5,,218.43665,647.3586,,,,,,454.64722,667.23474,,109.0911,5,1,2,5,4,1,,,1,3,2,2,1,,94637.89,Tyrosine-protein kinase Fer OS=Homo sapiens OX=9606 GN=FER PE=1 SV=2
414,TRUE,P61026	RAB10_HUMAN,292.2687,13,9701.876,21460.412,156048.58,124884.56,46575.277,10178.04,15125.453,28771.316,73611.24,79499.35,6000.7964,7503.331,10,21,32,63,60,44,29,20,25,49,48,19,14,Oxidation (M),22540.928,Ras-related protein Rab-10 OS=Homo sapiens OX=9606 GN=RAB10 PE=1 SV=1
1020,TRUE,Q15800	MSMO1_HUMAN,163.45316,4,312.31366,1233.8883,5245.133,16667.195,1231.603,,209.9873,1364.3591,4123.259,11440.17,392.6215,309.99295,4,6,6,6,12,3,3,4,4,5,6,3,5,Oxidation (M),35215.69,Methylsterol monooxygenase 1 OS=Homo sapiens OX=9606 GN=MSMO1 PE=1 SV=1
448,TRUE,Q9HCU4	CELR2_HUMAN,280.14026,15,1136.9851,4673.616,532.8379,241.91147,2282.089,,690.6062,1767.8989,846.93005,,1095.83,1639.1326,14,10,21,4,2,12,7,9,7,3,6,11,8,Oxidation (M),317452.5,Cadherin EGF LAG seven-pass G-type receptor 2 OS=Homo sapiens OX=9606 GN=CELSR2 PE=1 SV=1
654,TRUE,O43663	PRC1_HUMAN,195.8755,9,276.2606,790.2658,13117.461,2026.0946,341.26135,,,293.66675,10101.8125,10353.657,439.673,586.569,9,1,3,9,6,2,,1,2,4,6,1,1,Oxidation (M); Carbamidomethylation,71606.58,Protein regulator of cytokinesis 1 OS=Homo sapiens OX=9606 GN=PRC1 PE=1 SV=2
1033,TRUE,P05187	PPB1_HUMAN,148.20448,5,,,,,,,,,80.744316,,442.62668,307.5996,5,2,,1,,,,,1,2,,3,4,,57953.83,"Alkaline phosphatase, placental type OS=Homo sapiens OX=9606 GN=ALPP PE=1 SV=2"
1099,TRUE,Q95460	HMR1_HUMAN,144.76349,4,179.14249,1214.6692,1262.1664,516.8463,420.89597,,,421.86435,1308.6729,1037.6097,480.00906,538.4533,4,4,1,2,2,1,3,1,1,3,4,1,1,,39365.99,Major histocompatibility complex class I-related gene protein OS=Homo sapiens OX=9606 GN=MR1 PE=1 SV=1
1420,TRUE,Q16790	CAH9_HUMAN,72.407265,2,,,,,,,,,992.355,,,,2,,,,,,,,1,2,,,,,49697.86,Carbonic anhydrase 9 OS=Homo sapiens OX=9606 GN=CA9 PE=1 SV=2
615,TRUE,Q9ULC4	MCTS1_HUMAN,218.22966,7,,,10314.545,3840.045,4891.0693,,1685.396,4014.9543,16344.906,9695.046,817.14636,,7,,,15,12,11,1,13,5,14,15,2,,Carbamidomethylation; Oxidation (M),20555.275,Malignant T-cell-amplified sequence 1 OS=Homo sapiens OX=9606 GN=MCTS1 PE=1 SV=1
760,TRUE,P50443	S26A2_HUMAN,264.56668,7,354.19632,1076.9546,7777.111,4150.531,9785.338,1116.361,6834.208,7495.459,8420.369,8546.281,976.4862,465.2648,7,4,4,8,9,10,4,12,10,12,16,3,2,Carbamidomethylation; Oxidation (M),81661.5,Sulfate transporter OS=Homo sapiens OX=9606 GN=SLC26A2 PE=1 SV=2
497,TRUE,Q9Y6G9	DC1L1_HUMAN,264.7306,13,,161.88603,5640.535,37676.434,425.7826,,1466.6604,4058.687,16590.123,20002.467,1304.1809,1868.4414,13,,1,13,13,6,,11,9,15,18,9,8,Carbamidomethylation,56579.137,Cytoplasmic dynein 1 light intermediate chain 1 OS=Homo sapiens OX=9606 GN=DYNC1LI1 PE=1 SV=3
956,TRUE,Q9HB21	PKHA1_HUMAN,172.60638,5,1009.60846,2488.3025,2985.3826,2145.2207,967.35114,202.01918,514.43835,3042.69,1121.9435,1161.9604,1074.2736,135.43942,5,4,5,7,5,6,1,4,6,2,1,6,7,Oxidation (M),45553.49,Pleckstrin homology domain-containing family A member 1 OS=Homo sapiens OX=9606 GN=PLEKHA1 PE=1 SV=2
766,TRUE,Q02750	MP2K1_HUMAN,234.85767,6,420.9637,,5139.6104,5007.997,1738.7969,486.28894,1664.0939,589,6550.2876,4757.4155,367.1939,934.2025,5,2,3,8,4,10,3,8,6,8,8,3,4,Carbamidomethylation; Oxidation (M),43439.008,Dual specificity mitogen-activated protein kinase kinase 1 OS=Homo sapiens OX=9606 GN=MAP2K1 PE=1 SV=2
608,TRUE,P51151	RAB9A_HUMAN,252.57364,10,3475.8613,8833.955,33934.92,20914.723,4068.6602,,836.63776,2340.639,17436.729,16418.084,2859.8604,4734.9097,8,15,13,21,16,14,4,2,7,13,14,10,9,Oxidation (M); Carbamidomethylation,22837.578,Ras-related protein Rab-9A OS=Homo sapiens OX=9606 GN=RAB9A PE=1 SV=1
226,TRUE,Q9H223	EHD4_HUMAN,292.71786,20,7515.7876,9906.943,49818.777,38124.215,27154.145,3886.0295,30722.598,45738.9,67880.08,56554.734,7880.316,16287.932,15,25,19,33,29,27,22,28,35,38,34,17,24,Oxidation (M); Carbamidomethylation,61175.125,EH domain-containing protein 4 OS=Homo sapiens OX=9606 GN=EHD4 PE=1 SV=1
426,TRUE,Q14BN4	SLMAP_HUMAN,227.67462,15,286.1897,1138.324,5552.338,3875.8413,485.2694,,,,1607.6493,5158.9995,411.41913,225.1588,15,7,9,12,14,2,,,1,14,10,2,2,Carbamidomethylation,95198.3,Sarcolemmal membrane-associated protein OS=Homo sapiens OX=9606 GN=SLMAP PE=1 SV=1
65,TRUE,P27824	CALX_HUMAN,463.30896,48,167162.47,316789.78,1158952.8,1010061.3,196041.25,43711.414,130949.97,171498.06,938791.56,937996.25,150932.11,179755.64,48,68,67,149,129,65,34,49,57,141,147,68,65,Carbamidomethylation; Oxidation (M); Acetylation (N-term),67568.3,Calnexin OS=Homo sapiens OX=9606 GN=CANX PE=1 SV=2
1021,TRUE,P14209	CD99_HUMAN,170.32687,4,,,3336.3013,1644.577,8862.542,,3663.1926,8042.5225,3260.5317,3997.5024,,,4,,,7,4,8,,9,6,7,5,,,Oxidation (M),18847.873,CD99 antigen OS=Homo sapiens OX=9606 GN=CD99 PE=1 SV=1
1326,TRUE,Q01968	OCRL_HUMAN,82.2784,2,,,494.43704,362.96185,461.2284,,243.06618,548.0674,870.08167,851.1538,185.8212,396.78253,2,,,1,2,2,,1,2,2,1,1,3,,104204.65,Inositol polyphosphate 5-phosphatase OCRL OS=Homo sapiens OX=9606 GN=OCRL PE=1 SV=3
427,TRUE,P29992	GNA11_HUMAN,262.301,14,485.27167,1622.8206,10535.762,5346.132,4491.7876,,678.9972,1779.5452,6715.6904,6622.461,371.33893,205.74216,9,7,10,30,20,17,8,14,12,21,17,5,5,Carbamidomethylation; Oxidation (M),42123.33,Guanine nucleotide-binding protein subunit alpha-11 OS=Homo sapiens OX=9606 GN=GNA11 PE=1 SV=2
96,TRUE,Q00341	VIGLN_HUMAN,406.68262,37,5723.5615,14826.859,98577.875,44981.28,28634.947,2193.3076,26209.008,39246.03,113526.805,153386.94,9942.665,18639.914,37,27,28,69,70,48,26,47,52,68,69,37,33,Oxidation (M); Carbamidomethylation; Acetylation (N-term),141455.64,Vigilin OS=Homo sapiens OX=9606 GN=HDLBP PE=1 SV=2
532,TRUE,Q93100	KPBB_HUMAN,230.67508,12,,,2423.6545,2454.169,374.239,,,290.79834,20512.105,18258.033,390.20972,,12,,3,8,8,4,,1,4,16,13,6,2,,124884.36,Phosphorylase b kinase regulatory subunit beta OS=Homo sapiens OX=9606 GN=PHKB PE=1 SV=3
591,TRUE,O15111	IKKA_HUMAN,225.90697,11,799.21277,2227.7969,6011.8906,3852.3577,121.21254,,,914.84326,4267.1685,4168.097,1348.8821,698.9238,11,4,6,9,9,5,,3,6,9,10,5,5,Oxidation (M); Carbamidomethylation,84639.58,Inhibitor of nuclear factor kappa-B kinase subunit alpha OS=Homo sapiens OX=9606 GN=CHUK PE=1 SV=2
25,TRUE,O60437	PEPL_HUMAN,482.9246,90,18716.346,42504.867,208618.95,149587.95,76487.5,5788.9663,14545.416,27608.613,145650.6,151671.95,12956.25,15534.718,90,75,97,160,126,100,56,70,78,129,134,56,60,Oxidation (M); Carbamidomethylation,204746.83,Periplakin OS=Homo sapiens OX=9606 GN=PPL PE=1 SV=4
192,TRUE,Q7L1W4	LRC8D_HUMAN,358.6294,27,22589.143,43634.812,31039.322,22654.99,36259.14,3799.5273,16366.111,27881.459,35065.13,27849.54,19072.861,24094.338,27,25,39,32,28,36,14,25,26,22,27,29,28,Carbamidomethylation; Oxidation (M),98201.4,Volume-regulated anion channel subunit LRRC8D OS=Homo sapiens OX=9606 GN=LRRC8D PE=1 SV=1
1124,TRUE,Q05469	LIPS_HUMAN,129.86812,3,,,324.14923,,,,,,,,,,3,,1,4,4,,,,,1,1,,1,Oxidation (M),116597.9,Hormone-sensitive lipase OS=Homo sapiens OX=9606 GN=LIPE PE=1 SV=4
164,TRUE,P17655	CAN2_HUMAN,344.65775,24,474.42416,5570.8604,16267.39,9788.043,7007.9673,114.59274,4799.0312,16787.623,23696.71,35647.293,2975.2205,3378.5823,24,4,15,27,25,25,7,26,32,51,45,9,15,Carbamidomethylation; Oxidation (M),79995.35,Calpain-2 catalytic subunit OS=Homo sapiens OX=9606 GN=CAPN2 PE=1 SV=6
689,TRUE,Q8N4X5	AF1L2_HUMAN,234.82225,9,,258.60046,1529.3777,1050.0787,1395.8737,,1483.1953,2214.8745,8977.157,8514.324,265.00473,,9,1,4,5,4,6,,4,4,11,9,3,4,Carbamidomethylation,91299.664,Actin filament-associated protein 1-like 2 OS=Homo sapiens OX=9606 GN=AFAP1L2 PE=1 SV=1
356,TRUE,Q8TD43	TRPM4_HUMAN,294.24234,18,,104.30356,3127.3076,1647.5006,13608.738,1270.3577,13499.94,23122.549,15732.62,9434.882,,251.52734,18,1,2,10,10,15,16,14,19,23,20,2,3,Carbamidomethylation; Oxidation (M),134301.02,Transient receptor potential cation channel subfamily M member 4 OS=Homo sapiens OX=9606 GN=TRPM4 PE=1 SV=1
1349,TRUE,Q14542	S29A2_HUMAN,139.33728,2,,,,,288.4629,,542.4104,2473.2153,646.2401,1666.2051,,,2,,,1,,1,1,2,4,2,3,1,,,50113,Equilibrative nucleoside transporter 2 OS=Homo sapiens OX=9606 GN=SLC29A2 PE=1 SV=3
929,TRUE,P50579	MAP2_HUMAN,155.6679,6,,,3262.0923,2233.418,273.7313,,159.16548,1279.2673,6225.5317,1378.0914,,,6,,,7,5,4,,3,5,8,6,,,Acetylation (N-term); Carbamidomethylation,52891.562,Methionine aminopeptidase 2 OS=Homo sapiens OX=9606 GN=METAP2 PE=1 SV=1
1028,TRUE,P04156	PRIO_HUMAN,160.9034,4,,1260.8197,4148.969,1538.2507,193.99425,,356.57806,2342.386,6183.212,5946.745,,,4,,4,4,4,4,2,3,4,6,5,,3,Carbamidomethylation; Oxidation (M),27661.162,Major prion protein OS=Homo sapiens OX=9606 GN=PRNP PE=1 SV=1
32,TRUE,O75691	UTP20_HUMAN,456.78387,71,1798.1599,5542.5005,44444.258,30838.293,,,485.32623,266.9298,75599.55,76015.766,9261.669,14093.441,71,14,24,80,66,1,,3,5,84,94,38,37,Oxidation (M); Acetylation (N-term); Carbamidomethylation,318385.4,Small subunit processome component 20 homolog OS=Homo sapiens OX=9606 GN=UTP20 PE=1 SV=3
823,TRUE,P84095	RHOG_HUMAN,239.92336,7,1463.591,2464.8076,8642.273,9410.217,4203.491,171.67375,1739.3263,781.4269,20367.543,19295.652,1451.6959,2403.497,6,8,5,13,12,16,4,11,9,15,11,9,9,Carbamidomethylation,21308.5,Rho-related GTP-binding protein RhoG OS=Homo sapiens OX=9606 GN=RHOG PE=1 SV=1
592,TRUE,Q8IZH2	XRN1_HUMAN,209.05273,11,118.9617,967.0028,1743.716,526.93713,136.30627,,,830.0149,6482.694,4847.836,1213.575,1677.5464,11,2,3,5,3,3,,2,3,12,9,4,6,,194107.28,5'-3' exoribonuclease 1 OS=Homo sapiens OX=9606 GN=XRN1 PE=1 SV=1
513,TRUE,Q9H9J2	RM44_HUMAN,293.34152,11,1121.2886,2129.645,22320.646,17117.986,19382.652,3031.7412,6888.551,13488.15,30496.2,31351.527,1579.8217,2802.8464,11,4,4,20,12,14,6,10,11,15,20,2,5,Oxidation (M); Carbamidomethylation,37535.37,"39S ribosomal protein L44, mitochondrial OS=Homo sapiens OX=9606 GN=MRPL44 PE=1 SV=1"
292,TRUE,P62140	PP1B_HUMAN,337.33954,18,466.97845,687.7447,11817.1,9003.223,1923.5079,78.25529,1448.8369,2135.8872,11198.07,13149.189,899.8344,1225.1697,5,11,15,41,29,19,16,18,16,32,29,6,5,Carbamidomethylation; Oxidation (M),37186.83,Serine/threonine-protein phosphatase PP1-beta catalytic subunit OS=Homo sapiens OX=9606 GN=PPP1CB PE=1 SV=3
871,TRUE,Q5T0N5	FBP1L_HUMAN,162.88,7,,,,,,,,310.55087,1062.3765,1784.1173,,,7,,,4,3,1,,,4,2,7,,,Oxidation (M),70065.484,Formin-binding protein 1-like OS=Homo sapiens OX=9606 GN=FNBP1L PE=1 SV=3
488,TRUE,P05026	AT1B1_HUMAN,309.09457,13,27062.445,39735.945,75296.125,51660.04,125473.65,41230.453,145899.53,201801.7,141580.75,139609.77,68471.625,72067.56,13,14,14,22,18,29,21,29,36,30,30,21,18,Carbamidomethylation; Oxidation (M),35061.3,Sodium/potassium-transporting ATPase subunit beta-1 OS=Homo sapiens OX=9606 GN=ATP1B1 PE=1 SV=1
1107,TRUE,P07602	SAP_HUMAN,181.38704,4,285.998,980.6148,3492.3933,2370.7498,9805.396,1794.8107,2442.107,4630.197,2861.6863,2787.353,650.50806,904.4474,4,2,2,6,7,9,5,5,4,3,2,2,1,Oxidation (M),58112.637,Prosaposin OS=Homo sapiens OX=9606 GN=PSAP PE=1 SV=2
1386,TRUE,Q7Z699	SPRE1_HUMAN,61.928787,2,,70.25769,,,,,,,,,,,2,,1,,,,,1,,,,,,Carbamidomethylation; Acetylation (N-term); Oxidation (M),50476.816,"Sprouty-related, EVH1 domain-containing protein 1 OS=Homo sapiens OX=9606 GN=SPRED1 PE=1 SV=2"
1433,TRUE,O43306	ADCY6_HUMAN,105.67652,2,,,,,405.28082,,367.82446,640.5838,,,,,2,,,,,3,,2,5,,,,,Oxidation (M),130615.375,Adenylate cyclase type 6 OS=Homo sapiens OX=9606 GN=ADCY6 PE=1 SV=2
628,TRUE,P20339	RAB5A_HUMAN,210.87949,6,119.56988,680.6592,19772.371,17355.816,3446.7515,,522.5971,3390.612,20892.363,7924.544,184.87643,467.92358,3,10,12,24,22,14,8,8,18,21,20,5,7,Oxidation (M),23658.678,Ras-related protein Rab-5A OS=Homo sapiens OX=9606 GN=RAB5A PE=1 SV=2
700,TRUE,Q93052	LPP_HUMAN,234.29726,8,773.4175,2901.6577,807.13885,1210.0134,404.00598,,1052.7219,5449.546,1079.8523,4433.8984,1581.1903,2409.979,8,4,9,7,7,5,6,5,13,16,14,10,10,Oxidation (M); Carbamidomethylation,65746.33,Lipoma-preferred partner OS=Homo sapiens OX=9606 GN=LPP PE=1 SV=1
415,TRUE,Q9NPH3	IL1AP_HUMAN,286.69058,15,15867.091,29822.934,13557.201,11192.446,39240.508,2817.364,26527.4,47350.152,25610.516,30885.094,33396.49,38375.54,15,16,23,12,12,22,12,24,26,19,17,25,31,Oxidation (M),65418.438,Interleukin-1 receptor accessory protein OS=Homo sapiens OX=9606 GN=IL1RAP PE=1 SV=2
257,TRUE,Q6NZI2	CAVN1_HUMAN,349.56314,17,45461.223,79007.53,166128.11,120729.195,41518.223,7592.2188,22139.186,28818.771,138279.38,147560.42,26855.484,33611.59,17,31,35,58,48,26,14,17,23,44,48,29,24,Oxidation (M); Acetylation (N-term),43476.133,Caveolae-associated protein 1 OS=Homo sapiens OX=9606 GN=CAVIN1 PE=1 SV=1
547,TRUE,Q03135	CAV1_HUMAN,285.36716,12,46135.484,74034.164,193010.62,150577.75,44311.17,11949.502,32298.035,57650.94,220309.97,222404.58,59208.938,61138.01,12,22,24,38,32,18,13,16,16,35,35,25,21,Carbamidomethylation,20471.615,Caveolin-1 OS=Homo sapiens OX=9606 GN=CAV1 PE=1 SV=4
1190,TRUE,Q5BJF2	SGMR2_HUMAN,121.17051,3,,,3338.2449,9611.734,,,,,2724.7903,2223.8188,,,3,,,3,7,,,,,4,6,,,,20847.887,Sigma intracellular receptor 2 OS=Homo sapiens OX=9606 GN=TMEM97 PE=1 SV=1
614,TRUE,Q96EP0	RNF31_HUMAN,238.36726,10,132.83789,419.89984,1194.7548,790.9763,229.49478,,114.27465,731.8979,1482.477,2456.0613,544.28235,1388.175,10,2,4,4,5,3,,2,4,8,9,6,3,Carbamidomethylation; Oxidation (M),119652.02,E3 ubiquitin-protein ligase RNF31 OS=Homo sapiens OX=9606 GN=RNF31 PE=1 SV=1
693,FALSE,P62987	RL40_HUMAN,199.14592,5,88056.43,137605.64,271798.94,258485.02,322625.5,142883.31,218658.83,303838.88,318691.06,325820.25,99666.38,124832.11,5,15,16,23,24,22,15,15,21,21,27,16,14,,14728.311,Ubiquitin-60S ribosomal protein L40 OS=Homo sapiens OX=9606 GN=UBA52 PE=1 SV=2
1342,TRUE,Q9BYI3	HYCCI_HUMAN,95.73759,2,,,,,,,297.0149,624.22406,921.82996,849.6955,,282.33386,2,1,,,,1,2,1,2,1,1,1,1,,57625.426,Hyccin OS=Homo sapiens OX=9606 GN=FAM126A PE=1 SV=2
542,TRUE,Q8WX93	PALLD_HUMAN,189.77347,12,,,234.84497,,,,,211.62764,4475.347,4203.7485,973.33813,1147.0029,12,,,3,1,,,,3,10,13,5,5,Carbamidomethylation,150563.86,Palladin OS=Homo sapiens OX=9606 GN=PALLD PE=1 SV=3
1332,TRUE,P25942	TNR5_HUMAN,92.90783,2,,,914.53827,239.78847,,,,261.66092,,,,,2,,,1,1,,,,2,,1,,,Carbamidomethylation,30618.969,Tumor necrosis factor receptor superfamily member 5 OS=Homo sapiens OX=9606 GN=CD40 PE=1 SV=1
1013,TRUE,Q8NBX0	SCPDL_HUMAN,165.1442,4,,,278.2768,568.4471,,,,,400.42316,,,,4,,,5,2,,,,,2,1,,,Oxidation (M); Carbamidomethylation,47151.375,Saccharopine dehydrogenase-like oxidoreductase OS=Homo sapiens OX=9606 GN=SCCPDH PE=1 SV=1
583,TRUE,Q05193	DYN1_HUMAN,188.3005,10,,,,,,,,235.8094,1210.4407,741.44775,,,4,3,5,8,8,5,2,3,6,13,13,5,5,Oxidation (M),97408.25,Dynamin-1 OS=Homo sapiens OX=9606 GN=DNM1 PE=1 SV=2
16,FALSE,O75923	DYSF_HUMAN,155.47134,4,5597.8857,12411.209,32461.992,25754.027,13256.074,2182.3792,9270.693,12715.838,29622.328,29215.982,6627.5796,7613.672,4,3,5,6,9,3,6,4,5,5,12,3,3,,237294.95,Dysferlin OS=Homo sapiens OX=9606 GN=DYSF PE=1 SV=1
374,TRUE,P49755	TMEDA_HUMAN,289.52362,13,723.8601,4579.529,184224.42,135106.89,59966.465,10227.802,17758.09,20596.354,148953.81,167004.42,1273.293,2024.3164,13,5,9,42,32,26,12,11,8,40,41,2,4,Oxidation (M),24975.967,Transmembrane emp24 domain-containing protein 10 OS=Homo sapiens OX=9606 GN=TMED10 PE=1 SV=2
222,TRUE,O95425	SVIL_HUMAN,302.53064,26,604.4354,3504.3396,2733.5261,1154.3728,,,,825.64404,5215.2065,7309.088,250.61148,902.67865,26,13,15,21,14,3,,1,7,21,23,10,11,Carbamidomethylation; Oxidation (M),247746.36,Supervillin OS=Homo sapiens OX=9606 GN=SVIL PE=1 SV=2
1073,TRUE,Q8TAD4	ZNT5_HUMAN,126.012344,4,,,419.8665,317.6976,104.049416,,,,210.06808,98.82506,,,4,1,,2,1,1,,,,2,3,1,,,84046.5,Zinc transporter 5 OS=Homo sapiens OX=9606 GN=SLC30A5 PE=1 SV=1
1300,TRUE,Q14244	MAP7_HUMAN,64.84363,2,,,1038.8284,856.9145,,,,,,,,,2,,2,3,4,,,,1,,,,1,Acetylation (N-term),84051.77,Ensconsin OS=Homo sapiens OX=9606 GN=MAP7 PE=1 SV=1
389,TRUE,P98172	EFNB1_HUMAN,340.03506,13,40970.562,73345.71,66424.12,48963.168,129752.84,26640.393,85343.83,125440.555,94186.65,82632.24,49332.863,55785.1,11,25,33,34,27,44,27,39,42,44,45,28,35,Oxidation (M); Carbamidomethylation,38006.586,Ephrin-B1 OS=Homo sapiens OX=9606 GN=EFNB1 PE=1 SV=1
1189,TRUE,Q6XUX3	DUSTY_HUMAN,94.26143,3,,227.71135,,139.66739,,,,,,,,184.07146,3,1,1,2,2,,,,,,,,1,,105205.625,Dual serine/threonine and tyrosine protein kinase OS=Homo sapiens OX=9606 GN=DSTYK PE=1 SV=2
1293,TRUE,P0DP24	CALM2_HUMAN,98.00743,2,,1112.7196,4816.876,2600.8606,369.50385,,90.020096,179.46642,4401.0317,1289.1361,,482.9788,2,,4,3,2,1,,1,1,2,2,,1,,16837.582,Calmodulin-2 OS=Homo sapiens OX=9606 GN=CALM2 PE=1 SV=1
476,TRUE,Q9NP72	RAB18_HUMAN,285.73532,12,16631.852,34730.652,81031.11,65032.46,15476.742,1589.9089,4940.6123,11746.077,28280.957,48224.3,10556.432,16120.666,11,15,15,32,28,13,10,9,9,16,20,10,12,Oxidation (M); Carbamidomethylation,22977.07,Ras-related protein Rab-18 OS=Homo sapiens OX=9606 GN=RAB18 PE=1 SV=1
337,TRUE,P08758	ANXA5_HUMAN,284.08585,15,,,51922.945,48636.86,3330.928,,1677.7781,5273.5864,55670.36,47719.332,,,15,,,27,28,9,2,9,10,28,25,1,,Oxidation (M),35936.766,Annexin A5 OS=Homo sapiens OX=9606 GN=ANXA5 PE=1 SV=2
80,TRUE,P06733	ENOA_HUMAN,458.5258,42,73757.66,143116.27,705358.7,556028.06,105493.266,26984.205,119411.03,163616.36,1231735.1,1256119.5,148148.1,147900.95,36,62,67,144,152,62,49,73,76,188,192,69,79,Carbamidomethylation; Oxidation (M),47168.957,Alpha-enolase OS=Homo sapiens OX=9606 GN=ENO1 PE=1 SV=2
443,TRUE,P09525	ANXA4_HUMAN,265.20108,12,,,8251.373,6251.2397,916.4078,,794.8235,1747.5155,16527.855,16694.045,,393.04285,12,,,17,18,7,1,5,6,21,19,1,2,Oxidation (M); Carbamidomethylation,35882.71,Annexin A4 OS=Homo sapiens OX=9606 GN=ANXA4 PE=1 SV=4
598,TRUE,Q04760	LGUL_HUMAN,217.48,9,273.26276,1114.9993,66015.12,50325.164,11473.607,1075.4636,10238.391,13965.415,68781.18,69625.68,1297.3408,2114.7434,9,4,5,23,21,13,11,8,7,19,30,4,5,Carbamidomethylation; Oxidation (M),20777.707,Lactoylglutathione lyase OS=Homo sapiens OX=9606 GN=GLO1 PE=1 SV=4
804,TRUE,Q9Y653	AGRG1_HUMAN,221.51485,8,1010.0346,8593.83,9784.699,3358.5781,14571.193,2067.935,8527.647,15725.567,12361.4795,4836.7744,6373.1294,9977.786,8,10,8,6,8,10,8,8,10,8,6,7,8,,77738.02,Adhesion G-protein coupled receptor G1 OS=Homo sapiens OX=9606 GN=ADGRG1 PE=1 SV=2
920,TRUE,Q9Y4D7	PLXD1_HUMAN,193.36525,6,,26803.307,495.68808,,19184.734,,191.48073,623.797,1285.0593,,,813.4038,5,1,6,3,2,4,,4,5,4,3,5,11,,212006.95,Plexin-D1 OS=Homo sapiens OX=9606 GN=PLXND1 PE=1 SV=3
325,TRUE,Q05397	FAK1_HUMAN,258.0196,15,8150.9873,4866.3076,18082.62,8590.53,11725.9375,,11565.063,16932.598,22588.057,15518.674,12358.047,13220.243,15,12,12,18,16,14,3,14,22,15,16,14,18,Acetylation (N-term); Oxidation (M); Carbamidomethylation,119233.01,Focal adhesion kinase 1 OS=Homo sapiens OX=9606 GN=PTK2 PE=1 SV=2
983,TRUE,Q9UMF0	ICAM5_HUMAN,174.39229,5,,,,,304.7237,,2868.0344,6210.395,2601.93,3501.0237,981.2669,3275.2712,5,,,,,2,2,5,7,3,4,3,6,,97116.35,Intercellular adhesion molecule 5 OS=Homo sapiens OX=9606 GN=ICAM5 PE=1 SV=3
39,TRUE,P11142	HSP7C_HUMAN,492.3896,67,203944.75,327149.12,1391274.1,1158412,326667.28,78489.82,282359.5,398093.25,1504819,1606492.6,294671.94,343725.22,37,97,99,195,200,106,87,104,125,249,269,109,113,Carbamidomethylation; Oxidation (M); Acetylation (N-term),70898.086,Heat shock cognate 71 kDa protein OS=Homo sapiens OX=9606 GN=HSPA8 PE=1 SV=1
246,TRUE,Q96A65	EXOC4_HUMAN,335.32455,21,2445.8618,5017.552,18377.955,11659.267,5159.326,,3513.5415,8768.66,13642.804,15737.183,2260.8003,3202.5964,21,17,19,33,30,20,6,24,20,23,23,11,11,Oxidation (M),110498.055,Exocyst complex component 4 OS=Homo sapiens OX=9606 GN=EXOC4 PE=1 SV=1
665,TRUE,P48960	AGRE5_HUMAN,265.94977,8,2084.424,14285.077,18610.557,3213.7017,13580.104,750.3484,9772.915,28833.828,38427.883,30458.559,7884.0234,9501.431,8,14,18,12,12,17,4,19,20,22,21,16,16,Oxidation (M),91869.28,Adhesion G protein-coupled receptor E5 OS=Homo sapiens OX=9606 GN=ADGRE5 PE=1 SV=4
549,TRUE,Q15286	RAB35_HUMAN,280.78876,11,973.55396,7868.3115,21045.605,19234.928,20908.467,5086.1675,9550.047,16498.973,20267.064,21172.191,1044.4386,4318.4707,9,15,18,28,33,24,14,13,20,25,29,16,9,Carbamidomethylation; Oxidation (M),23025.215,Ras-related protein Rab-35 OS=Homo sapiens OX=9606 GN=RAB35 PE=1 SV=1
864,TRUE,Q5VW38	GP107_HUMAN,211.98886,7,,,8496.392,4391.3115,9317.199,773.3425,2028.3884,2981.0479,5321.126,4392.1025,,,7,,,12,4,9,5,7,5,7,8,,,Carbamidomethylation,66990.38,Protein GPR107 OS=Homo sapiens OX=9606 GN=GPR107 PE=1 SV=1
390,TRUE,Q9C0B5	ZDHC5_HUMAN,290.49454,15,4435.3403,19722.305,16596.77,4979.704,2288.0454,281.9268,795.343,4973.4966,19727.191,25227.137,22913.008,26202.445,15,16,15,14,14,11,3,3,6,22,16,22,19,Oxidation (M),77544.73,Palmitoyltransferase ZDHHC5 OS=Homo sapiens OX=9606 GN=ZDHHC5 PE=1 SV=2
1138,TRUE,Q29983	MICA_HUMAN,109.62783,3,,910.45105,452.48627,547.45276,448.1679,,,371.64157,764.89514,902.1387,768.69,2457.5632,3,2,5,2,3,1,,2,1,2,1,4,4,Oxidation (M),42915.4,MHC class I polypeptide-related sequence A OS=Homo sapiens OX=9606 GN=MICA PE=1 SV=1
1093,TRUE,Q8TF01	PNISR_HUMAN,111.75739,4,,,823.56354,508.90656,2693.127,,,1240.8013,2126.9065,,,,4,,,2,2,3,2,1,1,3,1,,,Oxidation (M),92576.77,Arginine/serine-rich protein PNISR OS=Homo sapiens OX=9606 GN=PNISR PE=1 SV=2
1308,TRUE,O75379	VAMP4_HUMAN,128.04633,2,,,776.14514,307.44693,,,,,,,,,2,,,2,2,,,,,,,,,,16396.809,Vesicle-associated membrane protein 4 OS=Homo sapiens OX=9606 GN=VAMP4 PE=1 SV=2
564,TRUE,P51153	RAB13_HUMAN,248.88849,9,11853.775,15246.329,49642.09,35431.11,18669.28,2890.094,8478.515,16346.984,37404.336,37838.773,12052.967,12969.835,7,15,18,28,29,25,9,18,20,24,19,19,20,Oxidation (M),22774.115,Ras-related protein Rab-13 OS=Homo sapiens OX=9606 GN=RAB13 PE=1 SV=1
352,TRUE,Q9BTU6	P4K2A_HUMAN,286.7798,17,2482.2866,6858.253,52500.47,62533.867,5382.2754,139.2969,2193.6948,3458.2192,23910.52,21257.744,2328.4187,2134.228,17,12,11,29,33,16,8,11,7,20,16,9,8,Oxidation (M),54022.363,Phosphatidylinositol 4-kinase type 2-alpha OS=Homo sapiens OX=9606 GN=PI4K2A PE=1 SV=1
225,FALSE,Q5JZY3	EPHAA_HUMAN,154.48837,2,1683.8125,4334.1553,251.54828,437.6251,2786.6125,191.67621,1203.4675,2718.889,2403.0444,2002.7373,1942.1167,2017.0013,2,3,5,4,2,4,2,5,4,2,1,4,2,,109715.91,Ephrin type-A receptor 10 OS=Homo sapiens OX=9606 GN=EPHA10 PE=1 SV=2
749,TRUE,Q9UHI5	LAT2_HUMAN,218.06148,6,,,786.7953,,1503.6439,,,,,,,,6,,4,4,1,10,,,,,,,,Carbamidomethylation; Oxidation (M),58381.625,Large neutral amino acids transporter small subunit 2 OS=Homo sapiens OX=9606 GN=SLC7A8 PE=1 SV=1
159,TRUE,P27816	MAP4_HUMAN,320.20477,28,6983.429,17015.637,35364.445,30607.945,12556.704,392.79974,15296.541,20126.033,65155.598,85495.13,24168.863,25442.67,28,21,22,34,32,28,13,25,28,43,42,28,36,Oxidation (M); Carbamidomethylation,121004.98,Microtubule-associated protein 4 OS=Homo sapiens OX=9606 GN=MAP4 PE=1 SV=3
1122,TRUE,Q8NFJ5	RAI3_HUMAN,137.08562,4,284.7964,377.10214,,,1240.2853,248.24947,994.1682,3194.3965,476.14224,1228.3756,,,4,1,2,2,2,2,1,3,3,3,1,1,1,Carbamidomethylation,40251.1,Retinoic acid-induced protein 3 OS=Homo sapiens OX=9606 GN=GPRC5A PE=1 SV=2
836,TRUE,P51788	CLCN2_HUMAN,165.27585,6,,377.48624,836.0758,582.1022,1823.831,,246.29616,124.04855,858.3604,656.37,,,6,1,2,4,5,10,2,2,1,3,2,,3,Oxidation (M),98535.45,Chloride channel protein 2 OS=Homo sapiens OX=9606 GN=CLCN2 PE=1 SV=2
1102,TRUE,Q13873	BMPR2_HUMAN,120.15172,4,,,,,360.8637,,,,,331.39166,,,4,,3,,,2,,,,,1,,1,Oxidation (M),115201.4,Bone morphogenetic protein receptor type-2 OS=Homo sapiens OX=9606 GN=BMPR2 PE=1 SV=2
822,TRUE,P29350	PTN6_HUMAN,206.93657,7,112.26944,1032.0945,930.976,439.34775,62.78853,,140.98183,423.79013,489.59857,465.313,398.08612,776.56116,7,3,7,3,3,5,,2,4,3,3,3,5,,67561.13,Tyrosine-protein phosphatase non-receptor type 6 OS=Homo sapiens OX=9606 GN=PTPN6 PE=1 SV=1
849,TRUE,P15153	RAC2_HUMAN,213.74043,7,901.9307,1881.8071,2440.6604,1682.7948,1580.6886,,2433.0928,,8405.526,8517.307,2620.453,,3,4,3,7,5,7,4,8,3,6,6,3,3,Carbamidomethylation,21428.8,Ras-related C3 botulinum toxin substrate 2 OS=Homo sapiens OX=9606 GN=RAC2 PE=1 SV=1
596,TRUE,P29966	MARCS_HUMAN,301.37173,11,124.731285,1572.0165,6961.54,4474.1807,2124.5576,,175.51624,1250.513,9488.088,8756.464,963.78955,728.29407,11,6,7,25,16,8,1,5,6,19,19,5,7,,31554.656,Myristoylated alanine-rich C-kinase substrate OS=Homo sapiens OX=9606 GN=MARCKS PE=1 SV=4
1309,TRUE,Q14210	LY6D_HUMAN,92.3923,2,,188.40771,187.35641,,,,,,1583.4082,1424.0205,618.3212,1514.8334,2,1,1,1,1,,,,,3,2,1,2,,13286.402,Lymphocyte antigen 6D OS=Homo sapiens OX=9606 GN=LY6D PE=1 SV=1
14,TRUE,P16144	ITB4_HUMAN,596.3475,117,1893137,3187149.2,2404274.2,1965735.1,2713077.5,742658.7,1710813.9,2760282,3417141.5,3488572.5,2370805,2646267.2,117,387,483,416,376,404,244,367,452,494,486,393,461,Carbamidomethylation; Oxidation (M); Acetylation (N-term),202167.14,Integrin beta-4 OS=Homo sapiens OX=9606 GN=ITGB4 PE=1 SV=5
117,TRUE,Q6P179	ERAP2_HUMAN,341.1961,26,5101.213,13587.039,124968.11,92093.55,140565.52,20683.145,18435.617,32654.797,52013.484,52387.99,898.8398,2573.3035,26,21,23,73,58,82,48,29,36,43,43,7,6,Oxidation (M); Carbamidomethylation,110461.69,Endoplasmic reticulum aminopeptidase 2 OS=Homo sapiens OX=9606 GN=ERAP2 PE=1 SV=2
190,TRUE,Q14247	SRC8_HUMAN,365.5958,26,7053.024,17637.031,39269.91,27501.414,16546.748,481.2929,6568.157,14229.29,50058.215,44650.996,14717.033,16766.555,26,25,28,49,43,39,11,26,24,38,39,28,37,Carbamidomethylation; Oxidation (M),61586.133,Src substrate cortactin OS=Homo sapiens OX=9606 GN=CTTN PE=1 SV=2
745,TRUE,O15120	PLCB_HUMAN,147.93703,4,944.1333,439.79974,11652.955,11245.015,3993.4038,,515.2912,275.74158,3910.8025,3251.062,579.63965,308.7134,4,2,2,15,13,8,3,2,1,5,5,1,2,Oxidation (M),30914.346,1-acyl-sn-glycerol-3-phosphate acyltransferase beta OS=Homo sapiens OX=9606 GN=AGPAT2 PE=1 SV=1
844,TRUE,Q9H910	JUPI2_HUMAN,183.61403,5,,,4039.8315,2863.4846,1909.6973,82.41827,1191.7,2229.567,9229.551,6759.758,1079.1531,1456.1962,5,,,8,4,7,3,3,4,14,13,1,1,Carbamidomethylation; Oxidation (M),20063.293,Jupiter microtubule associated homolog 2 OS=Homo sapiens OX=9606 GN=JPT2 PE=1 SV=1
186,TRUE,O15439	MRP4_HUMAN,329.98618,27,329.08798,3991.5398,3185.0305,1251.0327,19754.111,201.55948,18733.414,44723.695,6980.1445,10188.798,4435.4453,44060.492,26,9,12,11,5,27,14,34,41,14,12,22,11,Carbamidomethylation; Oxidation (M),149526.77,Multidrug resistance-associated protein 4 OS=Homo sapiens OX=9606 GN=ABCC4 PE=1 SV=3
208,TRUE,O43157	PLXB1_HUMAN,300.10287,26,1806.1375,5898.536,3083.522,2211.865,2111.733,,6916.9414,14167.586,18030.816,22294.627,6472.707,13182.607,24,11,21,11,12,18,5,26,32,17,20,24,33,Oxidation (M); Carbamidomethylation,232297.66,Plexin-B1 OS=Homo sapiens OX=9606 GN=PLXNB1 PE=1 SV=3
66,TRUE,O60716	CTND1_HUMAN,435.7731,43,80028.266,146795.66,166131.58,119185.516,147569.3,24695.168,82065.664,136912,167906.5,166309.94,72542.23,86986.805,43,64,97,99,88,81,37,64,89,98,112,65,68,Oxidation (M); Carbamidomethylation,108170.02,Catenin delta-1 OS=Homo sapiens OX=9606 GN=CTNND1 PE=1 SV=1
273,TRUE,P54578	UBP14_HUMAN,296.22128,17,1310.302,2136.1016,31401.91,12872.023,7398.8594,621.11487,7856.542,9647.321,30531.78,30961.805,3138.105,3932.7168,17,4,7,26,21,10,6,11,14,27,23,10,8,Carbamidomethylation; Oxidation (M),56069.066,Ubiquitin carboxyl-terminal hydrolase 14 OS=Homo sapiens OX=9606 GN=USP14 PE=1 SV=3
298,TRUE,Q9UHR4	BI2L1_HUMAN,312.96472,17,761.6113,7771.4536,12408.009,7714.625,16544.5,831.5925,9817.92,20998.375,26159.52,19177.996,4318.566,6727.076,17,8,17,20,16,27,7,22,19,18,17,14,11,Oxidation (M),56882.64,Brain-specific angiogenesis inhibitor 1-associated protein 2-like protein 1 OS=Homo sapiens OX=9606 GN=BAIAP2L1 PE=1 SV=2
413,TRUE,Q96PD2	DCBD2_HUMAN,290.2195,15,5330.251,11238.601,3272.5334,1241.6324,9706.683,356.30292,8072.866,19963.195,20385.297,13299.222,8033.3594,14263.873,15,11,15,13,8,15,10,18,20,17,14,21,18,Carbamidomethylation; Oxidation (M),85034.64,"Discoidin, CUB and LCCL domain-containing protein 2 OS=Homo sapiens OX=9606 GN=DCBLD2 PE=1 SV=1"
207,TRUE,P35241	RADI_HUMAN,325.2288,23,,,15248.379,9424.709,1775.9868,,1087.0569,1967.8013,26809.3,27641.025,,,15,1,1,51,44,14,10,21,16,55,52,3,4,Oxidation (M); Carbamidomethylation,68563.9,Radixin OS=Homo sapiens OX=9606 GN=RDX PE=1 SV=1
978,TRUE,Q13470	TNK1_HUMAN,156.57806,5,,,773.93066,180.19516,,,,,,,,,5,1,1,6,3,,,,,1,1,,,,72467.71,Non-receptor tyrosine-protein kinase TNK1 OS=Homo sapiens OX=9606 GN=TNK1 PE=1 SV=3
792,TRUE,Q9Y289	SC5A6_HUMAN,200.16907,7,3144.3364,5484.207,3650.3992,606.89343,8987.227,1760.4429,5383.46,13791.63,3440.692,3805.3096,4698.404,2826.3975,7,7,7,5,3,9,4,7,8,6,4,5,5,Oxidation (M),68641.94,Sodium-dependent multivitamin transporter OS=Homo sapiens OX=9606 GN=SLC5A6 PE=2 SV=2
1423,TRUE,Q8IUI8	CRLF3_HUMAN,93.763405,2,,,,,,,,302.19238,,,,,2,,,1,,1,,,1,,,,,,49765.914,Cytokine receptor-like factor 3 OS=Homo sapiens OX=9606 GN=CRLF3 PE=1 SV=2
94,TRUE,P63010	AP2B1_HUMAN,387.79007,34,9512.798,21216.367,218429.67,175447.14,77073.75,10896.571,46153.97,73837.3,148516.73,138303.86,7668.0176,9820.394,34,23,24,82,79,49,34,47,56,67,69,14,17,Oxidation (M); Carbamidomethylation,104552.56,AP-2 complex subunit beta OS=Homo sapiens OX=9606 GN=AP2B1 PE=1 SV=1
461,TRUE,O14672	ADA10_HUMAN,271.60754,13,36467.355,67015.195,59423.773,47054.535,77332.14,14049.459,36563.473,56477.707,51914.42,55775.938,47890.28,57693.086,13,21,17,17,22,23,13,15,18,21,20,21,18,Oxidation (M); Carbamidomethylation,84142.12,Disintegrin and metalloproteinase domain-containing protein 10 OS=Homo sapiens OX=9606 GN=ADAM10 PE=1 SV=1
1431,TRUE,O95298	NDUC2_HUMAN,74.2692,2,,,1859.2328,1352.0173,,,,,1589.628,457.5347,,,2,,,2,1,,,,,2,2,,,,14187.511,NADH dehydrogenase [ubiquinone] 1 subunit C2 OS=Homo sapiens OX=9606 GN=NDUFC2 PE=1 SV=1
1381,TRUE,Q96HI0	SENP5_HUMAN,113.48761,2,,,329.14124,,,,,,820.63525,270.31342,,,2,,,2,,,,,,2,2,,,,86693.03,Sentrin-specific protease 5 OS=Homo sapiens OX=9606 GN=SENP5 PE=1 SV=3
397,TRUE,P09493	TPM1_HUMAN,230.31442,14,2599.6357,7834.3887,82534.555,45127.473,32524.355,4285.159,17309.51,39456.5,121709.46,127678.234,7788.4424,7074.5654,14,7,6,20,16,15,6,11,14,28,31,9,4,Oxidation (M),32708.564,Tropomyosin alpha-1 chain OS=Homo sapiens OX=9606 GN=TPM1 PE=1 SV=2
672,TRUE,Q9ULF5	S39AA_HUMAN,222.76047,10,15261.885,22206.176,10666.702,5808.708,22374.543,3632.8813,20674.305,40366.59,24626.83,12740.665,29667.182,41412.438,10,14,11,6,3,10,4,15,13,11,8,17,16,Carbamidomethylation,94131.9,Zinc transporter ZIP10 OS=Homo sapiens OX=9606 GN=SLC39A10 PE=1 SV=2
1085,TRUE,Q92506	DHB8_HUMAN,163.86707,4,,,635.42725,1200.1091,851.68396,,216.69359,1046.997,3794.9407,1986.044,,,4,,,3,6,3,,5,6,6,4,,,Carbamidomethylation,26973.775,Estradiol 17-beta-dehydrogenase 8 OS=Homo sapiens OX=9606 GN=HSD17B8 PE=1 SV=2
969,TRUE,P78504	JAG1_HUMAN,139.8446,5,,756.8498,545.61957,463.71762,499.41602,,1507.4065,1684.1599,669.46136,,956.3723,1227.2001,5,2,4,1,2,2,1,2,5,2,2,2,5,Oxidation (M),133798.6,Protein jagged-1 OS=Homo sapiens OX=9606 GN=JAG1 PE=1 SV=3
975,TRUE,P21926	CD9_HUMAN,162.60695,5,19948.32,32006.506,86999.48,78958.62,7542.149,1806.2906,5098.8374,5980.1846,83988.9,49322.637,28281.172,33556.297,5,5,12,32,18,3,3,3,4,21,31,14,17,,25416.053,CD9 antigen OS=Homo sapiens OX=9606 GN=CD9 PE=1 SV=4
502,TRUE,Q9HD26	GOPC_HUMAN,276.12653,13,121.69453,2416.4087,13151.775,2464.7307,3341.4343,,848.47437,10561.1,17318.309,18467.469,424.34662,1702.8333,13,3,7,11,5,10,2,5,9,13,13,2,9,Carbamidomethylation,50519.97,Golgi-associated PDZ and coiled-coil motif-containing protein OS=Homo sapiens OX=9606 GN=GOPC PE=1 SV=1
444,TRUE,Q14574	DSC3_HUMAN,251.68285,15,1418.8118,2669.0286,1602.2583,883.9948,2957.4514,,1934.4712,3138.2168,4933.8896,5442.4624,3462.173,3462.0864,14,10,12,14,10,7,3,8,11,17,10,15,12,Oxidation (M),99968.984,Desmocollin-3 OS=Homo sapiens OX=9606 GN=DSC3 PE=1 SV=3
902,TRUE,Q92859	NEO1_HUMAN,183.71037,6,895.1278,1700.7898,279.75427,182.82852,1033.0026,,,1221.0114,565.13275,456.52838,1982.0262,1385.0394,6,5,4,2,1,2,,1,2,2,2,7,4,,160016.55,Neogenin OS=Homo sapiens OX=9606 GN=NEO1 PE=1 SV=2
407,TRUE,Q99829	CPNE1_HUMAN,261.4016,14,783.6974,419.7417,9618.086,7234.6616,7264.949,,7049.6553,13180.853,17717.73,17222.383,1715.9824,2577.8,14,1,3,17,10,14,4,15,13,21,20,8,4,Acetylation (N-term); Carbamidomethylation; Oxidation (M),59058.79,Copine-1 OS=Homo sapiens OX=9606 GN=CPNE1 PE=1 SV=1
269,TRUE,Q02978	M2OM_HUMAN,297.0533,15,22258.463,41620.58,228512.53,173124.02,31468.406,6230.5015,16473.256,26491.549,195591.3,126031.164,20937.088,25105.09,15,22,28,65,68,29,14,14,18,51,53,21,18,Acetylation (N-term); Oxidation (M),34061.707,Mitochondrial 2-oxoglutarate/malate carrier protein OS=Homo sapiens OX=9606 GN=SLC25A11 PE=1 SV=3
873,TRUE,Q9H329	E41LB_HUMAN,185.44148,7,,,,,297.37762,,,,,643.26996,,,5,1,3,4,3,6,2,3,4,3,2,1,2,,99712.49,Band 4.1-like protein 4B OS=Homo sapiens OX=9606 GN=EPB41L4B PE=2 SV=2
1296,TRUE,P40189	IL6RB_HUMAN,92.420425,2,519.60754,,,,633.123,,333.29565,580.2123,,,431.86984,498.63608,2,1,1,,,4,,4,2,,,2,2,,103536.59,Interleukin-6 receptor subunit beta OS=Homo sapiens OX=9606 GN=IL6ST PE=1 SV=2
91,TRUE,P07355	ANXA2_HUMAN,436.7109,41,184895.36,342528.47,1257944.8,1019814.94,614665.1,170788.6,448451.2,734648,1510698,1537180.4,317802.16,367686.72,41,65,72,124,112,111,62,98,104,163,162,64,73,Carbamidomethylation; Oxidation (M); Acetylation (N-term),38604.035,Annexin A2 OS=Homo sapiens OX=9606 GN=ANXA2 PE=1 SV=2
891,TRUE,Q9Y6M4	KC1G3_HUMAN,175.31244,6,,203.05893,,786.5711,1162.5259,,726.44165,,1328.7864,1304.5417,508.6995,340.01544,2,1,4,6,5,5,1,4,4,3,2,1,2,Oxidation (M); Carbamidomethylation,51388.508,Casein kinase I isoform gamma-3 OS=Homo sapiens OX=9606 GN=CSNK1G3 PE=1 SV=2
324,TRUE,Q12923	PTN13_HUMAN,259.2877,19,156.12646,552.5427,,,520.2884,,270.94046,6732.146,408.85776,1841.6833,596.291,2934.7583,19,1,6,1,1,5,1,5,16,3,3,5,15,,276905.56,Tyrosine-protein phosphatase non-receptor type 13 OS=Homo sapiens OX=9606 GN=PTPN13 PE=1 SV=2
780,TRUE,P51617	IRAK1_HUMAN,219.97385,8,,1124.5508,684.8147,1162.3733,,,,288.35486,2799.7183,1373.3833,315.10342,331.98004,8,2,2,7,4,,,,3,4,5,2,3,Carbamidomethylation,76536.69,Interleukin-1 receptor-associated kinase 1 OS=Homo sapiens OX=9606 GN=IRAK1 PE=1 SV=2
743,TRUE,P41240	CSK_HUMAN,201.20361,7,,172.12799,1876.1798,465.90768,1265.5251,,2355.01,2927.4897,6519.372,8892.488,333.28445,728.1832,7,,1,2,5,4,,5,5,4,9,2,2,Oxidation (M),50704.336,Tyrosine-protein kinase CSK OS=Homo sapiens OX=9606 GN=CSK PE=1 SV=1
906,TRUE,Q8IXI2	MIRO1_HUMAN,185.24652,6,,,1900.9702,18111.525,361.37378,,,,,556.4085,406.04034,404.83783,5,1,4,8,4,4,1,1,,3,3,3,2,Carbamidomethylation,70784.21,Mitochondrial Rho GTPase 1 OS=Homo sapiens OX=9606 GN=RHOT1 PE=1 SV=2
893,TRUE,P78329	CP4F2_HUMAN,172.27072,5,,,742.4448,124.91812,,,,,,,,,2,2,1,8,9,2,1,1,1,1,1,,,Oxidation (M),59853.46,Cytochrome P450 4F2 OS=Homo sapiens OX=9606 GN=CYP4F2 PE=1 SV=1
115,TRUE,Q9Y2A7	NCKP1_HUMAN,332.62527,24,5149.27,6710.77,32490.518,28066.254,61044.85,7388.6787,31323.17,58185.195,26569.064,25098.008,6266.185,8101.8574,24,20,23,45,35,50,36,45,48,32,28,25,20,Oxidation (M); Carbamidomethylation,128789.984,Nck-associated protein 1 OS=Homo sapiens OX=9606 GN=NCKAP1 PE=1 SV=1
727,TRUE,Q9NRY4	RHG35_HUMAN,170.6195,9,,,563.8233,,,,,271.5896,89.27821,433.6261,,,9,,,5,3,3,,,4,1,4,,,Oxidation (M),170514.08,Rho GTPase-activating protein 35 OS=Homo sapiens OX=9606 GN=ARHGAP35 PE=1 SV=3
1293,TRUE,P0DP25	CALM3_HUMAN,98.00743,2,,1112.7196,4816.876,2600.8606,369.50385,,90.020096,179.46642,4401.0317,1289.1361,,482.9788,2,,4,3,2,1,,1,1,2,2,,1,,16837.582,Calmodulin-3 OS=Homo sapiens OX=9606 GN=CALM3 PE=1 SV=1
572,TRUE,Q06787	FMR1_HUMAN,241.33171,10,2302.1384,3823.8096,15962.575,12874.898,2585.9348,325.31885,1849.1951,3356.1677,11627.344,10956.494,2727.0718,3423.4517,10,6,6,10,14,5,2,5,5,9,10,3,4,Oxidation (M),71174.47,Synaptic functional regulator FMR1 OS=Homo sapiens OX=9606 GN=FMR1 PE=1 SV=1
3,TRUE,P35579	MYH9_HUMAN,589.10034,145,22973.219,45250.758,483083.06,348024.72,172119.44,26778.002,272352,463306.75,1576242.1,1655867.5,69381.07,97309.125,128,53,70,292,274,169,80,222,265,470,511,103,119,Acetylation (N-term); Carbamidomethylation; Oxidation (M),226532.23,Myosin-9 OS=Homo sapiens OX=9606 GN=MYH9 PE=1 SV=4
602,TRUE,Q9Y696	CLIC4_HUMAN,202.00433,10,,,3164.298,2627.5637,2537.6367,302.0616,,1120.8082,3510.0747,3339.869,,,9,,,10,10,9,3,2,1,11,6,,,Carbamidomethylation; Oxidation (M),28772.102,Chloride intracellular channel protein 4 OS=Homo sapiens OX=9606 GN=CLIC4 PE=1 SV=4
645,TRUE,P57735	RAB25_HUMAN,244.46933,9,12363.557,17221.03,45529.324,41692.785,17066.697,1892.3833,2671.206,2741.2854,20385.383,17430.963,5988.16,7154.9907,9,13,16,24,13,15,11,9,10,21,13,14,13,Oxidation (M),23495.613,Ras-related protein Rab-25 OS=Homo sapiens OX=9606 GN=RAB25 PE=1 SV=2
1096,TRUE,O75907	DGAT1_HUMAN,190.61255,4,,,1431.1484,470.35132,,,,,842.31775,358.36758,,,4,,1,5,4,,,,,4,4,,,,55278.316,Diacylglycerol O-acyltransferase 1 OS=Homo sapiens OX=9606 GN=DGAT1 PE=1 SV=2
160,TRUE,Q03001	DYST_HUMAN,320.9888,31,194.71906,,6536.878,4812.9526,196.23845,,1826.6118,2060.3923,35296.582,18534.635,8734.349,2516.8574,26,4,2,16,22,6,2,10,12,40,34,9,15,Oxidation (M); Carbamidomethylation,860661.8,Dystonin OS=Homo sapiens OX=9606 GN=DST PE=1 SV=4
1316,TRUE,Q9Y575	ASB3_HUMAN,92.260765,2,,,523.959,145.8414,,,,,295.8555,384.22314,,,2,,,3,3,,,,,1,1,,,,57745.426,Ankyrin repeat and SOCS box protein 3 OS=Homo sapiens OX=9606 GN=ASB3 PE=1 SV=1
1344,TRUE,Q7Z402	TMC7_HUMAN,100.52743,2,,,,,204.33905,,151.18555,481.6257,422.84128,433.21423,,,2,,,2,1,3,1,2,3,1,2,,,,83501.664,Transmembrane channel-like protein 7 OS=Homo sapiens OX=9606 GN=TMC7 PE=1 SV=1
62,TRUE,O15020	SPTN2_HUMAN,402.72903,54,354.526,2785.9417,16589.498,11850.827,8240.781,,1613.8287,7261.7026,20937.67,20066.29,1453.1053,1786.0863,45,22,31,76,57,42,17,35,53,54,51,20,22,Carbamidomethylation; Oxidation (M),271324.88,"Spectrin beta chain, non-erythrocytic 2 OS=Homo sapiens OX=9606 GN=SPTBN2 PE=1 SV=3"
623,TRUE,P53041	PPP5_HUMAN,227.2074,9,,,1360.0989,1870.6193,2964.0654,,1063.8145,1199.2886,3747.2156,4293.0923,,,9,1,,8,10,9,3,8,5,10,8,1,1,Carbamidomethylation; Oxidation (M),56878.645,Serine/threonine-protein phosphatase 5 OS=Homo sapiens OX=9606 GN=PPP5C PE=1 SV=1
579,TRUE,O95171	SCEL_HUMAN,212.40486,11,,253.34537,5252.5967,3213.5464,402.2812,,,,,,,,11,1,5,18,11,4,,,,,,,,,77551.73,Sciellin OS=Homo sapiens OX=9606 GN=SCEL PE=1 SV=2
708,TRUE,P30626	SORCN_HUMAN,186.5866,9,427.61743,1332.5332,4617.6836,3113.6016,882.9597,,1043.5177,2913.295,15937.074,14314.806,2620.732,4212.816,9,3,2,6,5,2,,2,5,12,12,7,4,Carbamidomethylation,21676.375,Sorcin OS=Homo sapiens OX=9606 GN=SRI PE=1 SV=1
1375,TRUE,Q14790	CASP8_HUMAN,62.8335,2,,,,,149.19081,,,,,,,,2,,,,,1,,,,,1,,,,55391.105,Caspase-8 OS=Homo sapiens OX=9606 GN=CASP8 PE=1 SV=1
1390,TRUE,Q7Z5N4	SDK1_HUMAN,60.045265,2,,578.31665,,,,,,,,,,,2,1,3,,,,,,,,,,,,242111.84,Protein sidekick-1 OS=Homo sapiens OX=9606 GN=SDK1 PE=2 SV=3
866,TRUE,O96005	CLPT1_HUMAN,211.09528,6,96.21702,,27750.385,15387.028,13307.903,1919.578,560.96094,3486.96,9577.615,12338.591,,167.32408,6,5,3,16,15,15,9,4,9,10,16,,3,Oxidation (M); Carbamidomethylation,76096.67,Cleft lip and palate transmembrane protein 1 OS=Homo sapiens OX=9606 GN=CLPTM1 PE=1 SV=1
471,TRUE,Q92552	RT27_HUMAN,273.06842,13,668.2845,4069.4973,22101.416,12062.91,22419.54,851.8466,6700.352,15839.482,30276.51,31643.559,1984.9834,2793.122,13,5,5,17,12,14,11,9,13,17,22,3,3,Oxidation (M); Carbamidomethylation,47611.367,"28S ribosomal protein S27, mitochondrial OS=Homo sapiens OX=9606 GN=MRPS27 PE=1 SV=3"
781,TRUE,Q5ZPR3	CD276_HUMAN,277.87442,8,5004.1265,13951.344,3466.736,6362.8184,23996.809,1213.8462,22834.604,37933.656,23701.404,21537.602,18945.947,22627.916,8,10,18,11,11,19,10,21,19,15,13,17,20,Carbamidomethylation,57235.438,CD276 antigen OS=Homo sapiens OX=9606 GN=CD276 PE=1 SV=1
102,TRUE,Q8WXH0	SYNE2_HUMAN,326.3075,45,,945.5303,6873.2954,4582.528,,,,,8964.866,14716.023,176.56577,395.35468,45,2,8,36,26,,,,,30,28,1,4,Carbamidomethylation,796442.44,Nesprin-2 OS=Homo sapiens OX=9606 GN=SYNE2 PE=1 SV=3
703,TRUE,O60503	ADCY9_HUMAN,236.64798,9,108.390945,677.05096,261.70758,,3244.0933,147.08974,865.8237,5160.5493,862.53656,417.52167,261.55978,465.0368,9,2,5,3,2,9,3,12,11,7,6,3,2,,150700.73,Adenylate cyclase type 9 OS=Homo sapiens OX=9606 GN=ADCY9 PE=1 SV=4
355,TRUE,P48634	PRC2A_HUMAN,266.0305,17,3154.4924,5040.9473,5590.4873,2292.1775,1605.5098,,1351.1216,1716.822,7203.2363,4976.908,4381.843,4992.0815,17,10,10,12,4,3,1,7,3,15,16,8,11,Oxidation (M),228863.19,Protein PRRC2A OS=Homo sapiens OX=9606 GN=PRRC2A PE=1 SV=3
362,TRUE,O00291	HIP1_HUMAN,261.7346,16,,408.28577,3899.0657,2260.7554,716.2594,,681.749,2407.996,176054.69,6688.759,147.39839,560.2015,15,3,4,16,15,5,4,5,9,20,15,3,4,Carbamidomethylation; Oxidation (M),116221.14,Huntingtin-interacting protein 1 OS=Homo sapiens OX=9606 GN=HIP1 PE=1 SV=5
319,TRUE,Q96NY8	NECT4_HUMAN,307.68872,18,3844.8882,6334.2705,17863.287,7779.939,16510.125,784.59076,8750.558,24126.607,22352.623,12202.115,10459.241,12433.641,18,6,16,20,21,21,14,13,23,22,18,14,13,Carbamidomethylation; Oxidation (M),55454.285,Nectin-4 OS=Homo sapiens OX=9606 GN=NECTIN4 PE=1 SV=1
501,TRUE,P21709	EPHA1_HUMAN,274.94388,13,4915.348,10690.66,10397.951,5475.665,12033.041,471.85547,9168.895,13240.223,17428.605,13969.463,4066.8008,9669.819,13,14,11,13,12,14,15,11,13,14,14,11,11,Oxidation (M); Carbamidomethylation,108127.18,Ephrin type-A receptor 1 OS=Homo sapiens OX=9606 GN=EPHA1 PE=1 SV=4
957,TRUE,Q96KC8	DNJC1_HUMAN,169.0253,6,,271.85727,2479.0176,2174.9106,,,,,106.02823,877.23694,,,6,,2,12,8,1,,,,4,4,,1,,63882.87,DnaJ homolog subfamily C member 1 OS=Homo sapiens OX=9606 GN=DNAJC1 PE=1 SV=1
1361,TRUE,O00192	ARVC_HUMAN,109.79295,2,,18868.617,,,,,,,,15112.329,,9801.032,2,,3,,,2,,,,,1,,2,,104641.87,Armadillo repeat protein deleted in velo-cardio-facial syndrome OS=Homo sapiens OX=9606 GN=ARVCF PE=1 SV=1
1374,TRUE,O43318	M3K7_HUMAN,56.312828,2,,,,210.02823,,,,,,,,,2,,,,1,,,,,1,,,,,67196.055,Mitogen-activated protein kinase kinase kinase 7 OS=Homo sapiens OX=9606 GN=MAP3K7 PE=1 SV=1
1292,TRUE,Q9UKY7	CDV3_HUMAN,96.00111,2,,,273.73157,,,,,,2039.9514,2100.4717,,,2,,,3,,,,,1,1,3,,,,27334.838,Protein CDV3 homolog OS=Homo sapiens OX=9606 GN=CDV3 PE=1 SV=1
547,FALSE,P56539	CAV3_HUMAN,93.58052,2,19182.154,36168.75,60398.99,59007.65,23624.361,5600.0635,8551.576,23577.059,81215.21,79533.77,28538.684,29435.084,2,4,5,6,5,5,4,5,5,8,8,6,6,,17259.299,Caveolin-3 OS=Homo sapiens OX=9606 GN=CAV3 PE=1 SV=1
1153,TRUE,Q6PCB8	EMB_HUMAN,163.61821,3,9894.1455,12814.997,11095.542,6337.155,21306.074,4806.517,15493.518,20210.928,19990.514,19627.252,16630.613,19993.635,3,6,8,4,5,7,8,6,8,4,5,6,7,,36880.95,Embigin OS=Homo sapiens OX=9606 GN=EMB PE=1 SV=1
122,TRUE,Q07065	CKAP4_HUMAN,424.76428,35,7467.033,22864.383,230271.83,174447.16,44722.68,4072.5508,19061.545,33254.4,277105.28,280491.97,13581.47,17434.799,34,25,33,75,67,47,27,32,41,92,80,28,29,Oxidation (M); Carbamidomethylation,66022.46,Cytoskeleton-associated protein 4 OS=Homo sapiens OX=9606 GN=CKAP4 PE=1 SV=2
651,TRUE,Q86YS7	C2CD5_HUMAN,193.65085,9,1248.063,4527.1074,448.39417,405.12186,1386.228,,1373.5176,1109.188,1917.5322,2460.2256,793.3843,2192.5664,9,5,11,1,1,5,2,7,4,5,4,3,6,Carbamidomethylation; Oxidation (M),110447.01,C2 domain-containing protein 5 OS=Homo sapiens OX=9606 GN=C2CD5 PE=1 SV=1
881,TRUE,P20645	MPRD_HUMAN,183.26631,5,,316.71237,1559.503,457.57245,2666.3342,,907.7246,3532.959,16116.327,13082.885,,,5,1,1,2,3,7,1,1,7,8,8,,1,Carbamidomethylation; Oxidation (M),30993.27,Cation-dependent mannose-6-phosphate receptor OS=Homo sapiens OX=9606 GN=M6PR PE=1 SV=1
1380,TRUE,O95858	TSN15_HUMAN,100.22413,2,,,474.1961,552.12836,2934.177,,2080.1404,3725.3418,381.0702,348.24338,,,2,,,2,1,3,4,2,4,2,2,,,,33164.996,Tetraspanin-15 OS=Homo sapiens OX=9606 GN=TSPAN15 PE=1 SV=1
778,TRUE,Q96QT4	TRPM7_HUMAN,192.75323,8,,552.71704,,,,,,778.3352,730.80676,928.47626,120.389114,690.3257,8,3,6,1,,5,,3,12,2,3,3,7,Oxidation (M),212697.03,Transient receptor potential cation channel subfamily M member 7 OS=Homo sapiens OX=9606 GN=TRPM7 PE=1 SV=1
1279,TRUE,Q96J42	TXD15_HUMAN,135.36609,3,,,714.81726,,1326.3397,,,,,,,,3,1,,2,2,2,2,2,,,,,,,39885.195,Thioredoxin domain-containing protein 15 OS=Homo sapiens OX=9606 GN=TXNDC15 PE=1 SV=1
705,TRUE,Q99805	TM9S2_HUMAN,235.10992,7,,,9039.351,5369.3555,491.7368,,,,3978.391,6302.6025,,,7,2,1,13,19,7,1,1,3,16,13,1,2,Carbamidomethylation; Oxidation (M),75775.664,Transmembrane 9 superfamily member 2 OS=Homo sapiens OX=9606 GN=TM9SF2 PE=1 SV=1
139,FALSE,O00160	MYO1F_HUMAN,201.33115,5,1121.8395,2182.9355,6717.444,3037.9722,2389.5488,,2047.3005,6037.335,2773.6196,7768.1875,1750.8069,1728.197,4,6,6,11,8,8,7,8,6,7,7,4,4,Carbamidomethylation,124844.27,Unconventional myosin-If OS=Homo sapiens OX=9606 GN=MYO1F PE=1 SV=3
1169,TRUE,P41440	S19A1_HUMAN,130.21048,3,,272.7863,,,626.6273,,780.79266,1532.9238,,,436.43198,415.98062,3,1,2,1,,3,3,2,3,1,1,3,1,,64868.312,Reduced folate transporter OS=Homo sapiens OX=9606 GN=SLC19A1 PE=1 SV=3
811,TRUE,Q8IUW5	RELL1_HUMAN,241.39857,6,,878.4803,14507.558,9410.18,22437.332,1292.6943,5275.2437,19291.45,29940.973,24341.633,,,6,1,9,15,13,15,7,12,14,13,15,1,,Carbamidomethylation; Oxidation (M),29340.164,RELT-like protein 1 OS=Homo sapiens OX=9606 GN=RELL1 PE=1 SV=1
77,TRUE,P23634	AT2B4_HUMAN,398.21564,37,17822.852,37781.824,79422.7,53845.82,57536.855,5805.6475,15176.755,33170.434,52490.637,56368.207,11718.122,19106.182,24,59,69,96,89,72,43,52,55,66,69,46,54,Oxidation (M); Carbamidomethylation,137920.16,Plasma membrane calcium-transporting ATPase 4 OS=Homo sapiens OX=9606 GN=ATP2B4 PE=1 SV=2
1373,TRUE,Q9UGP4	LIMD1_HUMAN,93.56816,2,,,,,,,,,175.30153,160.69981,,,2,,2,,,,,,,1,1,,,,72190.2,LIM domain-containing protein 1 OS=Homo sapiens OX=9606 GN=LIMD1 PE=1 SV=1
1318,TRUE,Q99735	MGST2_HUMAN,116.885605,2,,,19305.826,7481.3545,,,,,13254.378,10429.203,,,2,,,6,8,1,2,,1,3,4,,,,16620.584,Microsomal glutathione S-transferase 2 OS=Homo sapiens OX=9606 GN=MGST2 PE=1 SV=1
187,TRUE,P52597	HNRPF_HUMAN,396.53613,24,104702.37,215131.56,376334.7,269287.84,67044.25,12290.848,45583.34,76566.29,433126.53,431623.2,119672.914,153190.03,24,39,54,73,65,17,13,18,19,82,79,42,43,Oxidation (M); Carbamidomethylation; Acetylation (N-term),45671.85,Heterogeneous nuclear ribonucleoprotein F OS=Homo sapiens OX=9606 GN=HNRNPF PE=1 SV=3
813,TRUE,Q15654	TRIP6_HUMAN,228.36111,7,1063.9056,3948.8787,1920.5751,1632.0923,643.32324,,117.13228,1162.8665,5057.986,5710.8916,2254.2363,4260.9155,7,7,8,8,4,4,1,4,6,12,11,7,6,Carbamidomethylation,50287.875,Thyroid receptor-interacting protein 6 OS=Homo sapiens OX=9606 GN=TRIP6 PE=1 SV=3
12,TRUE,P21333	FLNA_HUMAN,559.3258,131,43076.125,102519.5,670125.8,485016.78,241588.9,32406.725,214311.6,400940.16,984903.7,1016937.3,118885.44,136920.42,121,105,109,326,267,187,95,178,207,323,350,126,128,Carbamidomethylation; Oxidation (M),280739,Filamin-A OS=Homo sapiens OX=9606 GN=FLNA PE=1 SV=4
322,FALSE,P15313	VATB1_HUMAN,215.30238,6,,141.05013,6871.6064,5350.9624,,,,,7961.6953,7068.889,,,6,,2,10,10,,,,,6,6,,,Acetylation (N-term); Oxidation (M); Carbamidomethylation,56833.035,"V-type proton ATPase subunit B, kidney isoform OS=Homo sapiens OX=9606 GN=ATP6V1B1 PE=1 SV=3"
1314,TRUE,Q14678	KANK1_HUMAN,67.31363,2,,,,,,,,,,,,,2,,,1,,,,,,,1,,,,147289.1,KN motif and ankyrin repeat domain-containing protein 1 OS=Homo sapiens OX=9606 GN=KANK1 PE=1 SV=3
1418,TRUE,Q1HG43	DOXA1_HUMAN,79.89731,2,,,,,617.6118,,,,,,,,2,,,1,,3,1,1,,,,,,,37815.02,Dual oxidase maturation factor 1 OS=Homo sapiens OX=9606 GN=DUOXA1 PE=1 SV=1
4,TRUE,O75369	FLNB_HUMAN,590.99097,148,21694.578,50774.953,506608.22,380387.75,151073.38,16385.086,290037.62,497824.28,1398171.5,1435124.1,125497.07,171605.1,137,90,107,274,260,150,91,243,262,446,434,153,173,Oxidation (M); Carbamidomethylation,278164.03,Filamin-B OS=Homo sapiens OX=9606 GN=FLNB PE=1 SV=2
330,TRUE,P07996	TSP1_HUMAN,294.91833,16,11133.211,29838.648,21813.207,13944.119,20837.393,2332.5503,11497.347,19629.61,25593.88,23464.328,11085.241,19520.389,16,29,25,21,22,27,19,21,25,20,20,23,23,Oxidation (M),129382.664,Thrombospondin-1 OS=Homo sapiens OX=9606 GN=THBS1 PE=1 SV=2
211,TRUE,Q13740	CD166_HUMAN,355.909,21,66047.15,100711.68,50623.906,39335.07,103885.336,19995.566,139203.66,205177.38,107823.53,89356.055,141845.66,145060.33,21,37,53,23,24,50,24,67,74,41,37,63,66,Oxidation (M); Carbamidomethylation,65102.277,CD166 antigen OS=Homo sapiens OX=9606 GN=ALCAM PE=1 SV=2
940,TRUE,P23508	CRCM_HUMAN,186.43913,6,,1336.2461,1702.4808,888.4068,403.94708,,,860.7114,1877.1628,2926.5417,444.98328,659.1643,6,1,6,6,4,6,,1,3,7,6,2,6,,93027.27,Colorectal mutant cancer protein OS=Homo sapiens OX=9606 GN=MCC PE=1 SV=2
944,TRUE,P53365	ARFP2_HUMAN,177.28769,6,,,1696.4711,465.06567,158.52042,,,,2512.6821,3438.5244,,,6,,,5,3,2,,,,3,7,,,Oxidation (M),37855.73,Arfaptin-2 OS=Homo sapiens OX=9606 GN=ARFIP2 PE=1 SV=1
364,TRUE,P22059	OSBP1_HUMAN,267.2335,18,150.25226,1300.8872,14219.852,14085.545,5720.249,,2199.357,7196.8975,17081.516,16379.777,1398.3488,2140.6853,18,6,5,20,11,13,2,8,13,17,17,6,5,Oxidation (M); Carbamidomethylation,89420.56,Oxysterol-binding protein 1 OS=Homo sapiens OX=9606 GN=OSBP PE=1 SV=1
1135,TRUE,O00499	BIN1_HUMAN,186.78177,4,,,2179.288,428.755,,,,,4852.8057,4777.036,,,4,,,4,2,,,,1,5,7,,,,64699.38,Myc box-dependent-interacting protein 1 OS=Homo sapiens OX=9606 GN=BIN1 PE=1 SV=1
570,TRUE,Q68CP9	ARID2_HUMAN,205.30667,11,387.364,1215.2693,1065.4962,597.7016,,,,,2100.8047,2659.3945,350.94348,872.93115,11,2,5,7,3,,,,,6,9,1,4,Oxidation (M),197390.86,AT-rich interactive domain-containing protein 2 OS=Homo sapiens OX=9606 GN=ARID2 PE=1 SV=2
699,TRUE,O15400	STX7_HUMAN,216.03629,8,,352.69867,15044.316,11919.694,506.0989,,,441.58893,8907.904,10915.448,,,8,,2,13,12,1,1,,1,8,8,,,Carbamidomethylation; Oxidation (M),29815.53,Syntaxin-7 OS=Homo sapiens OX=9606 GN=STX7 PE=1 SV=4
437,TRUE,P13861	KAP2_HUMAN,300.85736,13,,476.33786,6212.201,6882.2827,1938.5317,,1437.6237,4134.034,7635.698,5483.8286,440.1173,928.0669,13,1,2,18,13,6,3,8,14,11,12,8,6,Carbamidomethylation; Oxidation (M); Acetylation (N-term),45518.402,cAMP-dependent protein kinase type II-alpha regulatory subunit OS=Homo sapiens OX=9606 GN=PRKAR2A PE=1 SV=2
922,TRUE,P00918	CAH2_HUMAN,203.88376,6,,,4060.6086,3469.766,,,,,4182.4854,3494.7256,,,6,,,7,9,,,1,,7,6,,,,29246.05,Carbonic anhydrase 2 OS=Homo sapiens OX=9606 GN=CA2 PE=1 SV=2
1142,TRUE,P17302	CXA1_HUMAN,165.57234,3,,,156.23923,,,,,71.118576,408.45227,2017.7432,,338.55832,3,,,2,1,,,,2,7,8,2,1,Oxidation (M),43008.383,Gap junction alpha-1 protein OS=Homo sapiens OX=9606 GN=GJA1 PE=1 SV=2
697,TRUE,O43752	STX6_HUMAN,245.0989,8,,,6008.8223,3053.8171,126.90025,,,,3581.9946,2550.3953,,,8,,,11,6,1,,,1,7,9,,,Oxidation (M),29175.95,Syntaxin-6 OS=Homo sapiens OX=9606 GN=STX6 PE=1 SV=1
667,TRUE,Q92845	KIFA3_HUMAN,216.37056,10,340.67978,,2306.455,328.99472,,,,,4250.381,960.0104,,7631.625,10,1,1,9,3,,,,1,7,9,,1,Carbamidomethylation,91205.14,Kinesin-associated protein 3 OS=Homo sapiens OX=9606 GN=KIFAP3 PE=1 SV=2
1087,TRUE,Q05655	KPCD_HUMAN,135.63905,4,,971.86163,5180.6006,3746.1077,294.48276,,309.60416,1676.5682,1877.8738,2028.6125,1392.3899,1855.1041,4,1,4,5,4,1,,2,3,4,2,3,3,Carbamidomethylation,77505.04,Protein kinase C delta type OS=Homo sapiens OX=9606 GN=PRKCD PE=1 SV=2
124,TRUE,P50895	BCAM_HUMAN,391.80475,26,157707.56,269497.97,260768.1,199385.8,341666.4,102210.88,147999.56,233335.22,184462.36,180358.56,129433.74,178516.66,26,82,88,95,83,94,60,64,83,71,76,69,77,Carbamidomethylation; Oxidation (M); Acetylation (N-term),67404.79,Basal cell adhesion molecule OS=Homo sapiens OX=9606 GN=BCAM PE=1 SV=2
216,TRUE,P51572	BAP31_HUMAN,307.3744,18,1523.1041,8831.812,141247.52,85459.914,13291.811,666.6963,2256.8188,8159.2466,128821.97,130005.17,812.32855,1234.6338,18,9,21,53,51,20,10,13,17,52,53,7,6,Oxidation (M),27991.604,B-cell receptor-associated protein 31 OS=Homo sapiens OX=9606 GN=BCAP31 PE=1 SV=3
762,TRUE,Q5VU97	CAHD1_HUMAN,196.74512,8,,,,,15828.227,,17575.936,30058.965,26577.3,,17483.887,21433.195,8,,,,,7,1,8,11,2,1,3,2,,142289.62,VWFA and cache domain-containing protein 1 OS=Homo sapiens OX=9606 GN=CACHD1 PE=2 SV=2
616,TRUE,Q9UHD9	UBQL2_HUMAN,205.66978,8,,,949.9863,630.7323,,,,,1311.6458,625.551,,,4,,,13,6,,,,1,15,9,,,Oxidation (M),65696.08,Ubiquilin-2 OS=Homo sapiens OX=9606 GN=UBQLN2 PE=1 SV=2
274,TRUE,A0FGR8	ESYT2_HUMAN,323.41,20,915.7848,2239.2646,12419.6045,11176.518,3051.4438,206.71762,369.13898,1853.0071,36259.355,31723.586,987.4878,748.35,20,8,14,35,30,14,3,5,13,36,32,6,7,Oxidation (M),102357.48,Extended synaptotagmin-2 OS=Homo sapiens OX=9606 GN=ESYT2 PE=1 SV=1
627,TRUE,Q13636	RAB31_HUMAN,217.9387,9,939.8452,1675.462,6257.5503,858.67993,,,,,1141.0479,2019.2363,722.13153,,7,2,2,11,4,1,4,1,1,7,7,4,1,Carbamidomethylation; Oxidation (M),21568.771,Ras-related protein Rab-31 OS=Homo sapiens OX=9606 GN=RAB31 PE=1 SV=1
219,TRUE,P53675	CLH2_HUMAN,348.1434,21,,152.32841,,,,,,161.46841,12792.835,,,,2,31,35,52,51,39,19,36,37,50,57,28,26,Oxidation (M); Carbamidomethylation,187029.9,Clathrin heavy chain 2 OS=Homo sapiens OX=9606 GN=CLTCL1 PE=1 SV=2
1210,TRUE,Q9NR82	KCNQ5_HUMAN,120.926605,3,,,,,,,,,,511.52972,,,3,,,,,,,,,,3,,,,102179.08,Potassium voltage-gated channel subfamily KQT member 5 OS=Homo sapiens OX=9606 GN=KCNQ5 PE=1 SV=3
421,TRUE,P17931	LEG3_HUMAN,251.77669,14,117810.45,200621.47,40712.676,29292.408,21013.914,2922.5542,12508.3125,27105.27,68025.47,82551.4,105693.984,140697.34,11,30,31,10,11,11,5,9,12,14,17,24,29,Oxidation (M),26152.33,Galectin-3 OS=Homo sapiens OX=9606 GN=LGALS3 PE=1 SV=5
1365,TRUE,Q6NYC1	JMJD6_HUMAN,113.385315,2,,401.6134,3854.2734,1852.0914,2614.429,,296.11865,658.9793,1439.5051,1254.4127,,,2,,1,3,2,3,2,1,1,1,1,,,,46462.004,Bifunctional arginine demethylase and lysyl-hydroxylase JMJD6 OS=Homo sapiens OX=9606 GN=JMJD6 PE=1 SV=1
214,TRUE,Q4KMQ2	ANO6_HUMAN,341.50708,22,5105.5415,10876.165,22648.957,14867.09,32406.764,2880.6692,24193.623,41588.098,48972.2,47400.652,12867.955,18616.484,22,13,19,31,22,31,14,29,37,37,35,20,22,Carbamidomethylation; Oxidation (M),106164.96,Anoctamin-6 OS=Homo sapiens OX=9606 GN=ANO6 PE=1 SV=2
972,TRUE,Q9H444	CHM4B_HUMAN,181.26135,5,,615.89014,3904.0503,3541.0469,1401.5625,,906.5385,2377.2424,12853.17,10021.457,,998.02905,5,2,2,4,6,3,3,3,5,5,6,4,6,,24950.15,Charged multivesicular body protein 4b OS=Homo sapiens OX=9606 GN=CHMP4B PE=1 SV=1
365,TRUE,P68400	CSK21_HUMAN,321.72107,15,71756.74,146276.03,90124.16,57110.156,18621.748,1831.4253,11144.817,21957.85,93205.88,93769.75,42261.87,56757.05,14,40,44,41,35,19,12,19,15,30,32,24,30,Oxidation (M),45143.574,Casein kinase II subunit alpha OS=Homo sapiens OX=9606 GN=CSNK2A1 PE=1 SV=1
772,TRUE,O14966	RAB7L_HUMAN,211.76102,8,6197.691,10553.655,22199.191,16084.426,5571.5938,498.21863,4857.9844,7359.9517,25580.72,25453.11,8971.586,8461.214,7,6,6,12,13,7,5,6,6,9,9,6,7,Carbamidomethylation; Oxidation (M),23155.248,Ras-related protein Rab-7L1 OS=Homo sapiens OX=9606 GN=RAB29 PE=1 SV=1
838,TRUE,P78356	PI42B_HUMAN,186.96753,6,,258.7083,1437.7302,751.74335,1182.2789,,178.55865,,1743.4935,1312.8143,,59.112587,4,1,2,5,7,10,,2,3,2,5,,1,Oxidation (M),47377.953,Phosphatidylinositol 5-phosphate 4-kinase type-2 beta OS=Homo sapiens OX=9606 GN=PIP4K2B PE=1 SV=1
342,TRUE,Q9Y5K6	CD2AP_HUMAN,291.24768,18,,,19291.107,10913.636,2100.3447,,1243.8485,2549.8845,11377.855,15450.844,300.9461,544.0222,18,,2,22,20,14,3,6,13,17,16,1,3,Oxidation (M),71451.17,CD2-associated protein OS=Homo sapiens OX=9606 GN=CD2AP PE=1 SV=1
154,TRUE,Q9NZ08	ERAP1_HUMAN,335.43408,28,81.628105,2106.1067,75069.695,58113,44821.1,3416.8066,4886.456,10597.472,32854.008,33477.383,,,27,4,9,53,48,44,25,20,19,29,29,,1,Oxidation (M); Carbamidomethylation,107234.8,Endoplasmic reticulum aminopeptidase 1 OS=Homo sapiens OX=9606 GN=ERAP1 PE=1 SV=3
401,TRUE,O60603	TLR2_HUMAN,245.36174,13,1103.4933,4952.992,1202.9231,,2453.4956,,1850.2999,6296.266,6189.121,4340.1084,3608.9297,6111.1797,13,9,14,4,1,6,2,10,13,14,16,11,11,Oxidation (M); Carbamidomethylation,89837.586,Toll-like receptor 2 OS=Homo sapiens OX=9606 GN=TLR2 PE=1 SV=1
406,TRUE,P26232	CTNA2_HUMAN,316.6432,14,14284.365,72671.39,48473,30833.537,52885.188,11317.211,45815.094,81489.06,60858.965,108540.75,31068.19,22816.346,3,21,22,34,33,26,21,25,20,33,34,20,19,Carbamidomethylation; Oxidation (M),105312.94,Catenin alpha-2 OS=Homo sapiens OX=9606 GN=CTNNA2 PE=1 SV=5
277,TRUE,O96019	ACL6A_HUMAN,288.68243,15,3214.1575,9948.323,30971.203,24490.125,2334.9058,,1005.0514,4121.9644,29568.115,29995.13,2121.7905,5137.196,15,5,12,21,26,8,3,4,8,25,24,6,10,Carbamidomethylation; Oxidation (M),47460.96,Actin-like protein 6A OS=Homo sapiens OX=9606 GN=ACTL6A PE=1 SV=1
1244,TRUE,Q15043	S39AE_HUMAN,144.73146,3,259.1748,1306.1575,,,,,,,2431.4763,3027.0894,515.39813,1469.9027,3,1,2,1,,2,1,,1,3,4,1,1,Carbamidomethylation,54212.29,Metal cation symporter ZIP14 OS=Homo sapiens OX=9606 GN=SLC39A14 PE=1 SV=3
1339,TRUE,Q9NRX5	SERC1_HUMAN,140.48392,2,,,,,523.7944,,,326.7253,,,,,2,,,,,4,2,1,3,,,,,,50494.945,Serine incorporator 1 OS=Homo sapiens OX=9606 GN=SERINC1 PE=1 SV=1
357,TRUE,Q16643	DREB_HUMAN,303.44736,15,4898.2417,9563.85,83875.664,42430.42,14622.615,1922.1368,7069.318,10890.983,47052.67,46825.22,7457.111,8434.412,15,10,9,25,23,15,6,11,10,27,22,10,11,Carbamidomethylation; Oxidation (M),71429.29,Drebrin OS=Homo sapiens OX=9606 GN=DBN1 PE=1 SV=4
1064,TRUE,Q8NG11	TSN14_HUMAN,157.16878,4,4345.64,8466.983,7410.6904,8542.328,14970.771,1948.7457,3121.0222,8906.336,5665.2734,8353.413,2925.0156,2921.4407,4,5,8,3,4,7,7,7,6,6,5,4,4,Carbamidomethylation,30690.83,Tetraspanin-14 OS=Homo sapiens OX=9606 GN=TSPAN14 PE=1 SV=1
400,TRUE,Q9P0L0	VAPA_HUMAN,260.0219,11,9343.477,30834.688,127176.08,89539.39,29599.32,268.7057,6230.206,31345.23,117979.79,118654.125,6571.3945,14879.375,9,25,25,56,54,35,17,27,32,49,47,14,14,Carbamidomethylation; Oxidation (M),27893.229,Vesicle-associated membrane protein-associated protein A OS=Homo sapiens OX=9606 GN=VAPA PE=1 SV=3
289,TRUE,Q12797	ASPH_HUMAN,327.0035,19,221.0087,6563.6333,20125.465,11602.49,7037.4727,,1815.6875,6994.217,27749.52,25505.336,3838.7114,7520.5034,19,11,9,23,19,15,4,12,10,25,24,7,8,Carbamidomethylation; Oxidation (M),85862.6,Aspartyl/asparaginyl beta-hydroxylase OS=Homo sapiens OX=9606 GN=ASPH PE=1 SV=3
1328,TRUE,P63165	SUMO1_HUMAN,120.2744,2,532.1754,1378.5592,3810.316,2451.8838,342.8488,,,426.66266,6463.5366,4311.341,1307.101,2034.2717,2,1,2,2,2,2,1,1,1,4,5,1,2,Acetylation (N-term),11556.984,Small ubiquitin-related modifier 1 OS=Homo sapiens OX=9606 GN=SUMO1 PE=1 SV=1
13,TRUE,Q5T4S7	UBR4_HUMAN,513.93823,126,19803.686,62881.07,128786.84,93308.766,49881.418,751.4148,42921.234,53566.227,225637.08,213994.56,41961.645,57606.875,126,93,110,160,147,68,29,69,77,182,165,88,91,Carbamidomethylation; Oxidation (M),573841,E3 ubiquitin-protein ligase UBR4 OS=Homo sapiens OX=9606 GN=UBR4 PE=1 SV=1
1024,TRUE,P42785	PCP_HUMAN,154.30725,4,,,,185.126,1183.0647,,,,348.47958,,,,4,,,,1,5,1,1,1,1,1,,,Oxidation (M),55799.79,Lysosomal Pro-X carboxypeptidase OS=Homo sapiens OX=9606 GN=PRCP PE=1 SV=1
915,TRUE,Q08357	S20A2_HUMAN,176.27657,6,,,,,298.8382,,1276.055,1998.7115,,1552.1619,,,6,1,5,2,1,5,2,5,7,2,3,2,2,,70392.414,Sodium-dependent phosphate transporter 2 OS=Homo sapiens OX=9606 GN=SLC20A2 PE=1 SV=1
1412,TRUE,P13987	CD59_HUMAN,104.788025,2,,,173.55444,,,,,237.07538,222.8757,561.1958,,,2,,3,2,1,3,,4,10,1,2,1,3,Carbamidomethylation,14177.284,CD59 glycoprotein OS=Homo sapiens OX=9606 GN=CD59 PE=1 SV=1
1182,TRUE,O15554	KCNN4_HUMAN,110.39308,2,,,,,,,,386.34122,,,,,2,,,1,1,3,2,1,3,,,,,Oxidation (M),47695.523,Intermediate conductance calcium-activated potassium channel protein 4 OS=Homo sapiens OX=9606 GN=KCNN4 PE=1 SV=1
774,TRUE,Q92485	ASM3B_HUMAN,200.74869,8,1252.6123,328.4463,1545.7256,1241.168,2425.7952,614.47894,2734.0732,1609.0533,2346.2783,3403.954,2517.8772,1525.9282,8,2,1,2,3,4,3,4,6,6,5,4,6,,50813.844,Acid sphingomyelinase-like phosphodiesterase 3b OS=Homo sapiens OX=9606 GN=SMPDL3B PE=1 SV=2
746,TRUE,P06702	S10A9_HUMAN,218.28807,5,5235.0312,11679.564,89639.234,63202.047,23428.254,4805.364,2203.7188,3029.664,1714.2572,1762.9307,,1062.0358,5,9,7,22,22,11,7,2,7,1,1,1,3,Oxidation (M),13241.986,Protein S100-A9 OS=Homo sapiens OX=9606 GN=S100A9 PE=1 SV=1
676,TRUE,Q08431	MFGM_HUMAN,208.33363,9,1039.3975,977.4638,11123.451,6330.9316,8160.8223,298.06326,7612.1885,13365.134,19793.703,16529.39,2931.924,3394.8872,9,3,9,10,10,12,7,11,19,11,14,5,6,Oxidation (M),43104.95,Lactadherin OS=Homo sapiens OX=9606 GN=MFGE8 PE=1 SV=3
1370,TRUE,Q9NUN5	LMBD1_HUMAN,128.66214,2,,,2312.2148,1641.114,2913.623,352.47656,490.69598,1031.1204,783.8181,2448.3965,,,2,,,1,1,1,3,1,1,1,2,,,,61388.74,Lysosomal cobalamin transport escort protein LMBD1 OS=Homo sapiens OX=9606 GN=LMBRD1 PE=1 SV=1
481,TRUE,P08865	RSSA_HUMAN,297.01172,11,2343.4563,11017.562,59502.29,43458.332,16751.646,991.0504,8727.891,10729.477,89452.32,103852.56,10319.66,10577.991,11,9,10,21,25,8,7,6,9,30,26,9,8,Carbamidomethylation; Oxidation (M); Acetylation (N-term),32854.074,40S ribosomal protein SA OS=Homo sapiens OX=9606 GN=RPSA PE=1 SV=4
911,TRUE,P35611	ADDA_HUMAN,142.7524,6,309.57843,586.78406,2881.6345,1316.2517,,,,,620.15784,1351.469,,,6,3,5,8,3,1,2,,1,5,5,,1,,80955.13,Alpha-adducin OS=Homo sapiens OX=9606 GN=ADD1 PE=1 SV=2
575,TRUE,Q8N1W1	ARG28_HUMAN,208.09607,11,93.4012,818.07886,3300.248,204.08395,,,,,1736.0736,2776.3755,278.27075,426.71155,11,2,7,8,4,1,,2,,8,10,4,3,Oxidation (M),191890.6,Rho guanine nucleotide exchange factor 28 OS=Homo sapiens OX=9606 GN=ARHGEF28 PE=1 SV=3
731,TRUE,Q9NUP9	LIN7C_HUMAN,203.64613,7,,2172.9575,11710.527,7412.4624,4791.078,,2213.4146,7263.5483,18702.277,16264.09,487.8542,191.43306,7,1,5,10,12,7,4,8,10,12,13,3,4,Acetylation (N-term); Oxidation (M); Carbamidomethylation,21833.975,Protein lin-7 homolog C OS=Homo sapiens OX=9606 GN=LIN7C PE=1 SV=1
378,TRUE,Q9Y6K5	OAS3_HUMAN,242.46143,15,1125.4532,2656.0908,13749.645,10828.233,5824.1216,139.2985,180.58807,,289.40604,394.9512,,163.58812,15,9,9,23,22,15,10,1,3,4,3,,1,Acetylation (N-term); Carbamidomethylation; Oxidation (M),121170.164,2'-5'-oligoadenylate synthase 3 OS=Homo sapiens OX=9606 GN=OAS3 PE=1 SV=3
638,TRUE,Q15833	STXB2_HUMAN,256.52676,10,,,649.15717,448.48688,792.6482,,338.99536,1191.3391,2483.805,1655.6343,,164.34348,10,,,8,6,4,1,4,5,11,7,,2,Carbamidomethylation; Oxidation (M),66452.54,Syntaxin-binding protein 2 OS=Homo sapiens OX=9606 GN=STXBP2 PE=1 SV=2
1408,TRUE,Q9UBI4	STML1_HUMAN,75.80761,2,,,387.77423,,,,,,,,,,2,,,3,1,,,,,,,,,,42968.086,Stomatin-like protein 1 OS=Homo sapiens OX=9606 GN=STOML1 PE=1 SV=1
418,TRUE,P62879	GBB2_HUMAN,301.44186,13,,,24079.717,16649.959,1378.9883,,,1694.4597,19619.408,14186.238,,,5,6,12,31,31,16,9,13,22,27,23,8,8,Carbamidomethylation; Oxidation (M); Acetylation (N-term),37331.027,Guanine nucleotide-binding protein G(I)/G(S)/G(T) subunit beta-2 OS=Homo sapiens OX=9606 GN=GNB2 PE=1 SV=3
691,TRUE,P57729	RAB38_HUMAN,207.47433,8,2883.974,9130.216,11372.461,9601.613,3603.2446,275.4129,2879.83,7994.0713,13758.264,13331.936,3414.9504,4302.913,7,10,13,12,12,9,6,14,13,10,15,12,10,Oxidation (M); Carbamidomethylation,23712.354,Ras-related protein Rab-38 OS=Homo sapiens OX=9606 GN=RAB38 PE=1 SV=1
544,TRUE,Q70E73	RAPH1_HUMAN,198.93138,11,,1408.3281,1950.1654,1016.2776,,,,374.1112,2331.4077,2004.8127,412.99615,513.9885,11,3,5,7,7,,,,3,5,6,2,6,Oxidation (M),135255.89,Ras-associated and pleckstrin homology domains-containing protein 1 OS=Homo sapiens OX=9606 GN=RAPH1 PE=1 SV=3
995,TRUE,Q13393	PLD1_HUMAN,166.40675,5,,,662.83057,95.53531,,,,,,,,,5,,,9,7,,,,,,,,,,124184.13,Phospholipase D1 OS=Homo sapiens OX=9606 GN=PLD1 PE=1 SV=1
732,TRUE,O15118	NPC1_HUMAN,209.55203,8,,,4741.7456,4474.564,12004.461,1817.6055,2953.7456,7995.7964,4480.1025,7037.3457,,,8,,,11,13,16,6,12,14,9,12,,,Oxidation (M),142166.84,NPC intracellular cholesterol transporter 1 OS=Homo sapiens OX=9606 GN=NPC1 PE=1 SV=2
880,TRUE,Q9P107	GMIP_HUMAN,142.12483,6,,320.91968,713.55493,242.57137,,,,,,333.9298,,,6,3,3,3,2,,,,1,2,1,1,4,Carbamidomethylation,106682.9,GEM-interacting protein OS=Homo sapiens OX=9606 GN=GMIP PE=1 SV=2
913,TRUE,Q2M2I8	AAK1_HUMAN,164.42825,6,,,1301.1812,,411.0358,,,,1316.3547,143.90971,,,6,1,,5,1,5,,1,,5,3,2,,Oxidation (M),103884.96,AP2-associated protein kinase 1 OS=Homo sapiens OX=9606 GN=AAK1 PE=1 SV=3
1157,TRUE,Q5I7T1	AG10B_HUMAN,98.24753,3,,1604.9053,3388.891,1313.0781,,,,2365.087,,776.1388,,,3,,1,2,3,1,,,1,2,3,,,,55447.934,"Putative Dol-P-Glc:Glc(2)Man(9)GlcNAc(2)-PP-Dol alpha-1,2-glucosyltransferase OS=Homo sapiens OX=9606 GN=ALG10B PE=1 SV=2"
936,TRUE,O15258	RER1_HUMAN,199.44035,4,3717.435,7686.534,41114.242,30921.428,9923.923,1667.5372,209.80878,3453.2578,24653.242,23813.34,2406.685,3452.6753,4,6,5,11,9,4,3,3,3,12,11,4,4,Acetylation (N-term); Oxidation (M),22957.965,Protein RER1 OS=Homo sapiens OX=9606 GN=RER1 PE=1 SV=1
1367,TRUE,Q7RTP6	MICA3_HUMAN,61.339405,2,,,,,,,,,150.26349,313.88672,,,2,,,,,,,,,2,2,,,,224294.83,[F-actin]-monooxygenase MICAL3 OS=Homo sapiens OX=9606 GN=MICAL3 PE=1 SV=2
842,TRUE,Q9ULL4	PLXB3_HUMAN,174.94841,7,,,,,,,,,281.0796,,127.40076,390.2752,5,2,4,1,3,2,2,3,2,2,2,3,7,,206847.16,Plexin-B3 OS=Homo sapiens OX=9606 GN=PLXNB3 PE=1 SV=2
1291,TRUE,Q8N8Q9	NIPA2_HUMAN,90.37945,2,,354.19107,527.8075,540.4399,,,,,,,,239.49997,2,,1,2,1,1,,,,,,2,1,,39185.027,Magnesium transporter NIPA2 OS=Homo sapiens OX=9606 GN=NIPA2 PE=2 SV=1
1208,TRUE,P35354	PGH2_HUMAN,103.12026,3,179.91205,3972.6685,7607.2354,,,,,2960.7031,4351.9165,4136.993,1913.0754,3535.8337,3,2,3,1,,,,,2,2,1,1,3,,68996.12,Prostaglandin G/H synthase 2 OS=Homo sapiens OX=9606 GN=PTGS2 PE=1 SV=2
1221,TRUE,Q9Y4H2	IRS2_HUMAN,136.38342,3,,,,170.71715,,,,,,,,,3,,,,2,,,,,1,2,1,1,,137334.06,Insulin receptor substrate 2 OS=Homo sapiens OX=9606 GN=IRS2 PE=1 SV=2
826,TRUE,P05362	ICAM1_HUMAN,217.82246,7,2722.652,4256.7666,13363.276,9593.891,35017.137,6592.256,9747.256,17139.613,2582.0054,5776.2305,2160.3599,3385.373,7,12,9,10,9,15,10,12,11,8,8,10,5,,57825.22,Intercellular adhesion molecule 1 OS=Homo sapiens OX=9606 GN=ICAM1 PE=1 SV=2
398,TRUE,Q7Z4S6	KI21A_HUMAN,270.56354,14,725.30225,3722.7017,2609.7847,3006.3787,818.03735,,179.83531,1106.9534,4490.6865,6957.84,,262.94568,14,11,16,15,10,7,,4,9,17,12,2,2,Oxidation (M); Carbamidomethylation,187179.05,Kinesin-like protein KIF21A OS=Homo sapiens OX=9606 GN=KIF21A PE=1 SV=2
1164,TRUE,Q15125	EBP_HUMAN,146.37262,3,,931.1375,69280.34,56758.656,700.855,,,837.06213,29443.621,32417.23,,,3,1,2,6,8,4,1,1,3,7,7,1,,Acetylation (N-term),26352.797,"3-beta-hydroxysteroid-Delta(8),Delta(7)-isomerase OS=Homo sapiens OX=9606 GN=EBP PE=1 SV=3"
224,TRUE,Q07954	LRP1_HUMAN,291.28433,23,306.33435,1697.7249,1424.1606,1158.9845,4019.4465,,2871.6335,5686.0566,13307.337,14527.065,3935.768,4539.5103,23,4,8,6,8,16,4,10,16,25,23,21,13,Oxidation (M),504606.3,Prolow-density lipoprotein receptor-related protein 1 OS=Homo sapiens OX=9606 GN=LRP1 PE=1 SV=2
609,TRUE,O75038	PLCH2_HUMAN,245.50247,11,,1451.4943,1153.7925,737.56445,2268.689,184.75626,1173.7727,2888.3826,936.97253,1501.5045,629.4583,1215.0518,11,6,6,3,4,9,7,4,4,6,5,5,5,Oxidation (M),154668.3,"1-phosphatidylinositol 4,5-bisphosphate phosphodiesterase eta-2 OS=Homo sapiens OX=9606 GN=PLCH2 PE=1 SV=3"
1290,TRUE,Q9NR22	ANM8_HUMAN,124.88696,2,800.92645,,8608.13,6981.582,5862.714,,2804.0938,6435.3164,6686.4326,600.7144,1286.6276,1510.8333,2,2,1,9,3,7,1,5,4,4,4,2,2,Oxidation (M),45291.156,Protein arginine N-methyltransferase 8 OS=Homo sapiens OX=9606 GN=PRMT8 PE=1 SV=2
585,TRUE,Q8NFF5	FAD1_HUMAN,253.11305,10,,687.0604,1947.577,195.84729,3002.0317,,157.62772,1848.5563,4077.9316,3020.9512,635.31757,620.2367,10,2,6,14,11,17,1,5,11,12,11,6,7,Oxidation (M),65265.562,FAD synthase OS=Homo sapiens OX=9606 GN=FLAD1 PE=1 SV=1
266,TRUE,P60903	S10AA_HUMAN,223.74112,7,8506.673,8659.442,64026.348,64716.19,41136.48,22568.7,37810.79,32208.848,95025.01,112947.69,5681.87,15942.855,7,5,5,27,19,22,6,13,18,42,40,7,13,Carbamidomethylation; Oxidation (M); Acetylation (N-term),11203.1,Protein S100-A10 OS=Homo sapiens OX=9606 GN=S100A10 PE=1 SV=2
1038,TRUE,O00592	PODXL_HUMAN,148.42763,5,,,,1673.9823,5159.4463,642.99133,,1905.887,1774.6355,,,1186.1748,5,1,1,5,4,7,2,1,2,2,2,2,1,Carbamidomethylation; Oxidation (M),58635.254,Podocalyxin OS=Homo sapiens OX=9606 GN=PODXL PE=1 SV=2
552,TRUE,Q99808	S29A1_HUMAN,252.16425,10,1038.0367,4622.678,9508.059,5258.468,64158.06,13692.955,56907.848,101772.43,20342.996,25727.436,3483.73,4866.4136,10,4,8,8,8,25,17,25,34,11,14,10,6,Carbamidomethylation; Oxidation (M),50219.44,Equilibrative nucleoside transporter 1 OS=Homo sapiens OX=9606 GN=SLC29A1 PE=1 SV=3
742,TRUE,Q8TEU7	RPGF6_HUMAN,167.50813,8,,465.22806,641.1083,538.43695,,,,140.37914,1029.9128,280.05902,297.37912,887.4282,8,1,4,3,3,,,1,1,3,5,2,5,,179422.81,Rap guanine nucleotide exchange factor 6 OS=Homo sapiens OX=9606 GN=RAPGEF6 PE=1 SV=2
643,FALSE,P36896	ACV1B_HUMAN,108.09927,2,1370.3032,1568.8062,1237.4824,718.93256,1912.1543,,,1351.6594,,11267.751,,,2,2,3,3,1,3,3,2,4,2,4,1,1,Oxidation (M),56806.535,Activin receptor type-1B OS=Homo sapiens OX=9606 GN=ACVR1B PE=1 SV=1
1227,TRUE,P58335	ANTR2_HUMAN,115.24222,3,,,,,,,98.2809,,409.5014,439.40015,,,3,,,1,,,,2,2,1,2,,,,53666.168,Anthrax toxin receptor 2 OS=Homo sapiens OX=9606 GN=ANTXR2 PE=1 SV=5
1173,TRUE,Q9ULK5	VANG2_HUMAN,82.42987,3,,,,,,,,,196.09702,,3638.6143,,3,1,,1,2,,,,1,3,,1,,Carbamidomethylation,59714.492,Vang-like protein 2 OS=Homo sapiens OX=9606 GN=VANGL2 PE=1 SV=2
879,TRUE,Q13444	ADA15_HUMAN,209.83966,6,4716.09,6529.8057,8480.886,4446.449,11314.387,1341.7593,6357.2617,9084.307,12453.739,11589.935,4297.679,4899.37,6,12,5,11,9,12,10,8,5,5,4,4,3,,92959.23,Disintegrin and metalloproteinase domain-containing protein 15 OS=Homo sapiens OX=9606 GN=ADAM15 PE=1 SV=4
738,TRUE,Q9UL26	RB22A_HUMAN,219.95633,8,675.93445,2258.054,9805.576,7900.9624,1580.8538,,265.9165,534.26355,7025.1943,5092.024,658.7218,1413.6365,6,5,6,18,14,7,4,4,3,10,10,4,5,Oxidation (M); Carbamidomethylation,21855.06,Ras-related protein Rab-22A OS=Homo sapiens OX=9606 GN=RAB22A PE=1 SV=2
812,TRUE,Q12933	TRAF2_HUMAN,187.45306,6,668.8061,1738.1261,2689.8843,898.8642,908.5719,,541.7102,135.7779,780.66895,3044.5056,691.3157,732.7826,6,4,5,5,7,6,,4,4,6,9,3,4,Oxidation (M); Carbamidomethylation,55859.375,TNF receptor-associated factor 2 OS=Homo sapiens OX=9606 GN=TRAF2 PE=1 SV=2
1176,TRUE,Q99985	SEM3C_HUMAN,92.344154,3,,102.83813,,,,,,,,,,,3,,1,,,5,1,,1,,,,,Oxidation (M),85207.03,Semaphorin-3C OS=Homo sapiens OX=9606 GN=SEMA3C PE=2 SV=2
1391,TRUE,Q96IZ0	PAWR_HUMAN,100.73948,2,,,,,152.74243,,,301.30408,972.0885,,,,2,,,1,1,1,,1,2,3,1,1,1,,36567.504,PRKC apoptosis WT1 regulator protein OS=Homo sapiens OX=9606 GN=PAWR PE=1 SV=1
958,TRUE,O95429	BAG4_HUMAN,183.24255,5,278.90152,1317.3025,2883.091,1468.2356,,,,,6628.6562,8606.487,1495.7495,2388.0117,5,4,1,6,6,,,,,6,5,4,2,Oxidation (M),49594.074,BAG family molecular chaperone regulator 4 OS=Homo sapiens OX=9606 GN=BAG4 PE=1 SV=1
674,TRUE,Q99497	PARK7_HUMAN,190.0324,6,,,9781.022,13169.007,18341.645,3001.0298,1519.8489,26868.736,18698.543,22635.73,,,6,,,11,12,5,4,4,5,17,11,,,Carbamidomethylation; Oxidation (M),19891.047,Parkinson disease protein 7 OS=Homo sapiens OX=9606 GN=PARK7 PE=1 SV=2
1079,TRUE,P13473	LAMP2_HUMAN,156.36069,4,91.31787,1264.6814,8625.34,10018.146,58626.832,21132.969,23052.697,38746.516,5772.4463,6805.9775,197.7439,630.3477,4,2,2,7,4,14,8,12,14,2,4,1,2,,44960.727,Lysosome-associated membrane glycoprotein 2 OS=Homo sapiens OX=9606 GN=LAMP2 PE=1 SV=2
386,TRUE,P20073	ANXA7_HUMAN,274.79703,12,19599.41,32142.07,24327.53,10804.797,9944.322,644.7684,5288.6943,7966.0586,28012.95,25363.576,22895.68,29501.932,12,27,35,17,17,12,8,5,8,25,21,22,28,Carbamidomethylation; Oxidation (M),52739.24,Annexin A7 OS=Homo sapiens OX=9606 GN=ANXA7 PE=1 SV=3
600,TRUE,Q6IAA8	LTOR1_HUMAN,236.18184,8,1164.5243,957.1227,39576.54,25735.176,2939.2227,360.42767,820.9643,561.4139,10944.213,9634.372,644.1887,300.09644,8,2,4,17,22,7,3,2,1,10,8,2,2,Oxidation (M),17744.818,Ragulator complex protein LAMTOR1 OS=Homo sapiens OX=9606 GN=LAMTOR1 PE=1 SV=2
789,TRUE,Q9BV40	VAMP8_HUMAN,158.34207,6,,126.80653,12259.612,7171.6187,346.4286,,,150.3085,8839.06,13476.695,,,6,1,1,6,3,2,2,,3,9,9,,,Acetylation (N-term); Oxidation (M),11438.247,Vesicle-associated membrane protein 8 OS=Homo sapiens OX=9606 GN=VAMP8 PE=1 SV=1
1356,TRUE,Q5T5C0	STXB5_HUMAN,86.65484,2,,,,124.96449,,,,,,,,,2,,,1,2,1,,,,,,,,,127572.56,Syntaxin-binding protein 5 OS=Homo sapiens OX=9606 GN=STXBP5 PE=1 SV=1
618,TRUE,P04049	RAF1_HUMAN,208.52946,9,799.51184,2357.7998,6953.657,4863.4146,809.6392,,416.72534,1166.6901,7350.634,7099.6636,1537.3248,2750.3667,9,7,6,9,10,4,,4,7,9,11,7,7,Carbamidomethylation; Oxidation (M); Acetylation (N-term),73051.56,RAF proto-oncogene serine/threonine-protein kinase OS=Homo sapiens OX=9606 GN=RAF1 PE=1 SV=1
721,TRUE,P60510	PP4C_HUMAN,226.22583,9,,587.16705,3253.4553,1785.2083,975.38293,,497.9269,,2381.861,2656.9766,,755.37897,7,1,2,11,9,2,1,2,1,9,6,1,1,Carbamidomethylation,35079.92,Serine/threonine-protein phosphatase 4 catalytic subunit OS=Homo sapiens OX=9606 GN=PPP4C PE=1 SV=1
425,TRUE,Q13557	KCC2D_HUMAN,282.6732,11,12111.729,21963.855,33532.715,22625.05,10035.81,691.65753,7567.5273,14104.657,29970.176,36729.984,8563.534,11987.128,11,11,14,25,19,9,4,10,11,16,20,9,13,Carbamidomethylation; Oxidation (M),56369.402,Calcium/calmodulin-dependent protein kinase type II subunit delta OS=Homo sapiens OX=9606 GN=CAMK2D PE=1 SV=3
333,TRUE,Q8WWI5	CTL1_HUMAN,281.09622,15,4342.1772,14144.441,33780.47,25905.611,5330.9756,,3146.976,8249.227,38862.254,34260.215,6325.035,9549.338,15,18,20,33,29,14,11,6,11,26,22,20,22,Oxidation (M); Carbamidomethylation,73302.11,Choline transporter-like protein 1 OS=Homo sapiens OX=9606 GN=SLC44A1 PE=1 SV=1
1378,TRUE,Q9NZ09	UBAP1_HUMAN,95.42377,2,,,,,,,,,1910.1506,3006.9775,,,2,,,,,,,,,2,3,,,,55083.555,Ubiquitin-associated protein 1 OS=Homo sapiens OX=9606 GN=UBAP1 PE=1 SV=1
729,TRUE,Q8IYI6	EXOC8_HUMAN,223.90703,9,439.36542,700.93994,4028.1428,1589.2366,4315.0586,241.56328,1755.4939,3870.431,1423.8362,1968.989,,209.44879,9,5,2,8,4,13,3,7,5,2,6,,2,,81799.07,Exocyst complex component 8 OS=Homo sapiens OX=9606 GN=EXOC8 PE=1 SV=2
1195,TRUE,Q9UBN7	HDAC6_HUMAN,99.48679,3,,,,,,,,,330.52588,,,,3,,,1,,,,,,1,2,,,,131419.2,Histone deacetylase 6 OS=Homo sapiens OX=9606 GN=HDAC6 PE=1 SV=2
684,TRUE,P25445	TNR6_HUMAN,241.08733,8,,,21590.22,14658.671,27942.484,1961.9379,19294.451,32111.094,42626.48,48907.008,170.06061,443.80124,8,1,,18,14,18,14,17,14,18,17,3,2,Carbamidomethylation; Oxidation (M),37732.2,Tumor necrosis factor receptor superfamily member 6 OS=Homo sapiens OX=9606 GN=FAS PE=1 SV=1
892,TRUE,O15379	HDAC3_HUMAN,162.2287,6,,,1759.3693,1125.3976,,,,,2610.4019,2575.5112,,96.41374,6,,3,6,7,,,,,5,5,,1,Oxidation (M),48847.742,Histone deacetylase 3 OS=Homo sapiens OX=9606 GN=HDAC3 PE=1 SV=2
939,TRUE,P11171	EPB41_HUMAN,149.51123,6,,,1172.7966,99.63897,294.54202,,180.34354,300.82828,1696.9045,2429.2979,,,5,,,3,1,1,,2,3,9,6,,,,97016.88,Protein 4.1 OS=Homo sapiens OX=9606 GN=EPB41 PE=1 SV=4
84,TRUE,P02786	TFR1_HUMAN,424.48508,43,391016.78,560690.25,580882.56,471468.75,604643.1,158759.2,283225.3,319774.1,498719.66,503685.72,209372.3,237895.19,43,118,143,116,109,122,98,103,101,112,128,88,84,Oxidation (M); Carbamidomethylation,84871.375,Transferrin receptor protein 1 OS=Homo sapiens OX=9606 GN=TFRC PE=1 SV=2
347,TRUE,P54920	SNAA_HUMAN,271.8975,14,,,43836.77,30866.844,11705.745,297.05487,1386.7488,3604.1392,27471.705,24899.05,,,14,,4,29,26,15,5,9,13,25,27,,2,Carbamidomethylation; Oxidation (M),33232.72,Alpha-soluble NSF attachment protein OS=Homo sapiens OX=9606 GN=NAPA PE=1 SV=3
541,TRUE,Q12955	ANK3_HUMAN,235.39142,12,329.90695,1071.9607,311.08624,,1803.7787,,555.3364,2964.0378,1100.5038,808.9413,665.39246,1002.28345,12,3,6,3,1,7,2,10,12,10,4,3,9,Oxidation (M),480410,Ankyrin-3 OS=Homo sapiens OX=9606 GN=ANK3 PE=1 SV=3
379,TRUE,Q14344	GNA13_HUMAN,290.1892,14,1409.213,5500.702,21235.059,13386.195,18161.71,1493.9564,6933.1436,18414.932,15055.473,16575.447,3105.4324,4665.7534,12,14,12,24,20,19,18,11,18,19,15,18,16,Oxidation (M); Carbamidomethylation,44049.57,Guanine nucleotide-binding protein subunit alpha-13 OS=Homo sapiens OX=9606 GN=GNA13 PE=1 SV=2
1101,TRUE,P29033	CXB2_HUMAN,139.35834,2,533.72516,1007.3495,25642.914,17443.258,3552.0933,177.07556,,,,269.61023,,,2,4,3,8,5,2,4,,,1,1,,1,Carbamidomethylation; Oxidation (M); Acetylation (N-term),26215.064,Gap junction beta-2 protein OS=Homo sapiens OX=9606 GN=GJB2 PE=1 SV=3
694,TRUE,P13726	TF_HUMAN,265.48083,9,92185.484,145656.53,62023.07,52455.52,97966.02,23759.67,45740.668,200340.88,54499.438,32250.64,55146.305,41520.26,9,20,26,12,11,21,16,10,15,5,8,13,13,Carbamidomethylation; Oxidation (M),33067.516,Tissue factor OS=Homo sapiens OX=9606 GN=F3 PE=1 SV=1
1075,TRUE,Q53EZ4	CEP55_HUMAN,118.192696,4,,,1029.5979,729.1345,,,,,976.9502,1790.1417,,,4,,1,3,2,,,,,6,4,1,,,54178.234,Centrosomal protein of 55 kDa OS=Homo sapiens OX=9606 GN=CEP55 PE=1 SV=3
1171,TRUE,Q13454	TUSC3_HUMAN,126.176994,3,,,329.63596,235.97704,,,438.22836,,3117.841,4076.2678,92.57327,,3,,,1,2,1,,1,1,4,4,1,1,,39676.19,Tumor suppressor candidate 3 OS=Homo sapiens OX=9606 GN=TUSC3 PE=1 SV=1
776,TRUE,Q16880	CGT_HUMAN,182.49564,7,,,3506.5015,1665.7332,231.9556,,,,941.52295,1215.7009,,,7,1,1,10,6,5,,1,1,7,5,,,Oxidation (M),61437.74,2-hydroxyacylsphingosine 1-beta-galactosyltransferase OS=Homo sapiens OX=9606 GN=UGT8 PE=1 SV=2
1165,TRUE,Q13021	MALL_HUMAN,141.48131,3,,1026.3352,,,,,,,,,,94.96483,3,3,5,,,,,,,,,1,2,Oxidation (M),17350.438,MAL-like protein OS=Homo sapiens OX=9606 GN=MALL PE=1 SV=2
31,TRUE,P13639	EF2_HUMAN,497.7576,66,55564.816,117664.03,875366.3,688796.94,326316.25,71192.7,363116.06,557380.6,1187726.8,1148550.6,144863.97,163471.22,66,65,67,177,167,113,68,120,148,229,202,87,79,Carbamidomethylation; Oxidation (M),95338.14,Elongation factor 2 OS=Homo sapiens OX=9606 GN=EEF2 PE=1 SV=4
1263,TRUE,P07093	GDN_HUMAN,124.863846,3,,,,,551.6953,,370.9597,437.5667,,,,,2,2,1,1,1,6,1,5,6,,,2,,,44002.22,Glia-derived nexin OS=Homo sapiens OX=9606 GN=SERPINE2 PE=1 SV=1
657,TRUE,P80723	BASP1_HUMAN,232.1296,10,,,538.8935,169.29457,,,,,3957.8772,3575.0967,,,10,,,9,3,,,,,17,15,,,,22693.408,Brain acid soluble protein 1 OS=Homo sapiens OX=9606 GN=BASP1 PE=1 SV=2
1382,TRUE,Q9H6L2	TM231_HUMAN,117.202705,2,,,534.25836,,545.1843,,2014.7903,1048.2534,757.5325,1614.0647,572.543,634.87683,2,,,3,1,4,1,3,3,2,2,1,1,,36058.82,Transmembrane protein 231 OS=Homo sapiens OX=9606 GN=TMEM231 PE=1 SV=1
2,TRUE,Q15149	PLEC_HUMAN,664.6207,318,498199.9,931900.2,1585377.4,1246858.4,435899.3,69626.625,325332.97,526669.75,2382052.5,2326098.8,508366.12,662132.25,294,422,492,608,541,332,210,326,360,722,721,388,420,Oxidation (M); Carbamidomethylation; Acetylation (N-term),531790.75,Plectin OS=Homo sapiens OX=9606 GN=PLEC PE=1 SV=3
894,TRUE,Q5SW96	ARH_HUMAN,177.18686,5,624.17444,833.05414,752.92505,1079.2977,2477.2476,,293.79303,350.70697,786.586,982.61523,308.2763,312.8687,5,4,6,3,4,5,6,1,1,2,1,3,2,Oxidation (M),33885.42,Low density lipoprotein receptor adapter protein 1 OS=Homo sapiens OX=9606 GN=LDLRAP1 PE=1 SV=3
1404,TRUE,Q969X1	LFG3_HUMAN,109.51082,2,,2204.17,4983.146,2723.563,254.25507,,,266.33905,4283.8755,,625.9319,1262.3693,2,1,3,5,2,1,,,1,2,1,2,1,,34607.44,Protein lifeguard 3 OS=Homo sapiens OX=9606 GN=TMBIM1 PE=1 SV=2
268,TRUE,Q9H4A4	AMPB_HUMAN,310.45233,20,337.52945,581.39374,37608.605,23276.408,13605.008,348.3388,3608.4976,6736.5864,37242.36,44379.94,535.4159,751.42236,20,5,3,34,26,18,12,19,16,33,29,6,6,Acetylation (N-term); Carbamidomethylation; Oxidation (M),72595.77,Aminopeptidase B OS=Homo sapiens OX=9606 GN=RNPEP PE=1 SV=2
1298,TRUE,P21980	TGM2_HUMAN,101.574844,2,,,,,,,257.4343,631.35034,,,,,2,,,,,,,2,2,,,,,,77328.82,Protein-glutamine gamma-glutamyltransferase 2 OS=Homo sapiens OX=9606 GN=TGM2 PE=1 SV=2
1199,TRUE,Q9BQE4	SELS_HUMAN,124.18089,3,,134.82562,1251.622,983.0205,,,,,969.9272,878.21606,,,3,1,1,2,3,2,,,,2,4,,1,Oxidation (M),21131.838,Selenoprotein S OS=Homo sapiens OX=9606 GN=SELENOS PE=1 SV=3
305,TRUE,Q13586	STIM1_HUMAN,268.35162,18,2756.2957,6559.5747,23463.225,18926.75,15347.768,1928.4077,3086.1104,4604.929,15096.496,13319.661,1476.9346,2776.289,17,8,12,21,19,17,11,6,8,17,20,10,8,Oxidation (M),77423.38,Stromal interaction molecule 1 OS=Homo sapiens OX=9606 GN=STIM1 PE=1 SV=3
1353,TRUE,Q8IYB5	SMAP1_HUMAN,99.600464,2,316.6423,536.6877,1517.6035,,,,328.53598,748.9031,971.67523,405.48428,,893.2975,2,1,3,1,1,1,1,1,2,1,3,1,2,,50386.49,Stromal membrane-associated protein 1 OS=Homo sapiens OX=9606 GN=SMAP1 PE=1 SV=2
359,TRUE,O75044	SRGP2_HUMAN,248.72531,17,1545.138,4154.245,3702.5938,9437.018,6247.1763,390.36823,12648.152,8411.838,1202.9161,1500.5044,1186.3867,1348.6514,17,13,12,12,10,16,9,13,12,2,5,5,8,Oxidation (M),120870.55,SLIT-ROBO Rho GTPase-activating protein 2 OS=Homo sapiens OX=9606 GN=SRGAP2 PE=1 SV=3
618,FALSE,P15056	BRAF_HUMAN,133.14182,3,,869.5103,3768.825,2597.2917,,,,970.47473,5799.83,5475.2104,1537.3248,2750.3667,3,6,3,6,5,2,,2,6,4,5,6,6,Oxidation (M),84436.88,Serine/threonine-protein kinase B-raf OS=Homo sapiens OX=9606 GN=BRAF PE=1 SV=4
1363,TRUE,O15162	PLS1_HUMAN,122.166595,2,,436.60278,623.7181,643.6809,,,,,,339.50217,,,2,1,1,3,3,,,,,,1,,,Carbamidomethylation,35049.07,Phospholipid scramblase 1 OS=Homo sapiens OX=9606 GN=PLSCR1 PE=1 SV=1
659,TRUE,Q9NSC5	HOME3_HUMAN,257.91202,9,,168.02315,3643.3938,2245.5146,331.1296,,,335.60526,5085.6357,6374.6494,,,8,,5,10,13,3,,2,6,10,14,1,3,Oxidation (M),39836.324,Homer protein homolog 3 OS=Homo sapiens OX=9606 GN=HOMER3 PE=1 SV=2
469,TRUE,Q6PIU2	NCEH1_HUMAN,272.82074,12,,,22655.578,17967.232,10587.346,929.84106,772.60547,2625.6567,20643.441,20465.512,,,12,,,19,16,18,7,3,8,16,15,,,Carbamidomethylation; Oxidation (M),45807.848,Neutral cholesterol ester hydrolase 1 OS=Homo sapiens OX=9606 GN=NCEH1 PE=1 SV=3
730,TRUE,Q06418	TYRO3_HUMAN,222.19328,8,,,1567.128,716.3124,3405.5884,,1558.1841,3797.5732,5210.333,3976.4648,,,7,,1,4,3,8,3,6,7,8,7,,,Oxidation (M); Carbamidomethylation,96905.3,Tyrosine-protein kinase receptor TYRO3 OS=Homo sapiens OX=9606 GN=TYRO3 PE=1 SV=1
473,TRUE,Q14677	EPN4_HUMAN,263.68427,13,3012.4062,8471.544,17204.188,11434.117,3393.162,,1790.4921,6160.919,47654.17,36164.703,4143.611,6050.2573,13,7,12,14,12,7,4,6,10,19,19,10,13,Oxidation (M),68259.44,Clathrin interactor 1 OS=Homo sapiens OX=9606 GN=CLINT1 PE=1 SV=1
437,FALSE,P31323	KAP3_HUMAN,127.43049,2,,,237.23444,689.24634,436.22668,,,847.6929,1281.4305,1293.6208,,,2,,,3,3,1,1,,3,1,1,,,Oxidation (M),46302.08,cAMP-dependent protein kinase type II-beta regulatory subunit OS=Homo sapiens OX=9606 GN=PRKAR2B PE=1 SV=3
250,FALSE,O75914	PAK3_HUMAN,170.38437,5,,361.0235,3435.4395,1692.4459,498.7597,,816.52045,1877.2574,4800.1064,4269.664,,363.1343,3,,3,5,2,4,,1,2,6,6,1,1,Carbamidomethylation,62309.62,Serine/threonine-protein kinase PAK 3 OS=Homo sapiens OX=9606 GN=PAK3 PE=1 SV=2
599,TRUE,P12429	ANXA3_HUMAN,215.36697,11,,449.86444,8657.949,4690.739,,,,1267.8875,61716.484,5769.081,,,11,,1,10,8,1,,1,1,11,7,1,,Carbamidomethylation,36375.266,Annexin A3 OS=Homo sapiens OX=9606 GN=ANXA3 PE=1 SV=3
440,TRUE,Q5H9R7	PP6R3_HUMAN,268.5013,14,1460.7424,2857.369,13353.904,7728.152,2922.79,,1482.1072,4429.1777,13050.805,14814.268,2429.2134,2952.8074,14,10,11,14,18,7,3,9,9,16,18,13,7,Oxidation (M); Carbamidomethylation,97669.09,Serine/threonine-protein phosphatase 6 regulatory subunit 3 OS=Homo sapiens OX=9606 GN=PPP6R3 PE=1 SV=2
170,TRUE,Q96RT1	ERBIN_HUMAN,311.77753,27,1473.225,10418.048,6587.989,3882.5374,12350.609,686.577,4185.023,13814.675,10126.182,9261.433,2834.436,5714.219,27,21,30,16,10,34,18,23,24,15,20,15,21,Oxidation (M),158298.11,Erbin OS=Homo sapiens OX=9606 GN=ERBIN PE=1 SV=2
