# Supplementary material for: Cell-surface tethered promiscuous biotinylators enable comparative small-scale surface proteomic analysis of human extracellular vesicles and cells
Source: eLife journal article supplement (doi:10.7554/elife.73982), 2022-03-04
Supplement: supp [file elife-73982-supp-v1.zip › elife_poa_e73982_Figure_3_source_data_2.xlsx]

## Sheet: Appendix
Sample Origin	Sample Names	Sheet Titles	Description
Cellular + WGA-HRP	Control_Cells_1-1	Raw Values	Area values produced from PEAKS Online X version 1.5
	Control_Cells_1-2	Total Area Normalization	Area values divided by the summed total area intensity
	Control_Cells_2-1	Imputed Matrix	Normalized values were log2(x) transformed and imputed using standard settings in Perseus
	Control_Cells_2-2	Significance < 0.05	Imputed matrix was triaged for proteins with significant differences between Control and Myc cells. Significance was based on p-values < 0.05 determined by standard unpaired Student t-test with unequal variances.
	Myc_Cells_1-1	Z-score	In order to plot heatmap figures, Z-scores were determined for each sample using the following equation: (LFQ area - Mean LFQ Area)/Standard Deviation.
	Myc_Cells_1-2
	Myc_Cells_2-1
	Myc_Cells_2-2

## Sheet: Raw Values
Protein Group	Top	Accession	Significance	Coverage (%)	#Peptides	#Unique	PTM	Myc_Cells_2-2 Area	Myc_Cells_2-1 Area	Myc_Cells_1-2 Area	Myc_Cells_1-1 Area	EV_Cells_2-2 Area	EV_Cells_2-1 Area	EV_Cells_1-2 Area	EV_Cells_1-1 Area	Sample Profile (Ratio)	Myc Cell Area	EV Cell Area	Group Profile (Ratio)	Avg. Mass	Description
197	TRUE	P46531|NOTC1_HUMAN	0.96	5.21	13	11	Oxidation (M)	13716.4	13335.8	3419.19	2955.84	8793.68	4781.58	7945.17	8805.01	1.72:1.67:0.43:0.37:1.10:0.60:1.00:1.10	8356.82	7581.36	1.05:0.95	272505	Neurogenic locus notch homolog protein 1 OS=Homo sapiens OX=9606 GN=NOTCH1 PE=1 SV=4
410	TRUE	P01889|HLAB_HUMAN	33.73	10.5	9	3		2548.45	2569.78	612.155	763.941	31979.8	19058.3	17754.5	24797	0.20:0.21:0.05:0.06:2.56:1.52:1.42:1.98	1764.82	23853.8	0.14:1.86	40460	HLA class I histocompatibility antigen, B alpha chain OS=Homo sapiens OX=9606 GN=HLA-B PE=1 SV=3
384	TRUE	P11166|GTR1_HUMAN	2.65	12.8	8	8	Oxidation (M)	29815.7	28689	14284.8	14529.8	22517.6	15035.2	16145	18286	1.50:1.44:0.72:0.73:1.13:0.76:0.81:0.92	21829.8	17995.9	1.10:0.90	54084	Solute carrier family 2, facilitated glucose transporter member 1 OS=Homo sapiens OX=9606 GN=SLC2A1 PE=1 SV=2
811	TRUE	O14735|CDIPT_HUMAN	8.38	15.96	3	3	Oxidation (M)	908.508	951.924	1430.62	843.699	1666.41	2496.37	2502.53	764.266	0.63:0.66:0.99:0.58:1.15:1.73:1.73:0.53	1033.69	1857.39	0.72:1.28	23539	CDP-diacylglycerol--inositol 3-phosphatidyltransferase OS=Homo sapiens OX=9606 GN=CDIPT PE=1 SV=1
650	TRUE	P38398|BRCA1_HUMAN	0.48	4.72	5	5	Oxidation (M)	2182.63	2268.9	511.743	457.567	1512.25	430.627	1225.56	1094.4	1.80:1.87:0.42:0.38:1.25:0.36:1.01:0.90	1355.21	1065.71	1.12:0.88	207721	Breast cancer type 1 susceptibility protein OS=Homo sapiens OX=9606 GN=BRCA1 PE=1 SV=2
931	TRUE	Q8NFH5|NUP35_HUMAN	2.25	19.02	4	4	Oxidation (M)	2097.98	2637.86	246.493	51.2425	712.216	1603.5	924.324	572.121	1.90:2.39:0.22:0.05:0.64:1.45:0.84:0.52	1993.96	1014.71	1.33:0.67	34774	Nucleoporin NUP35 OS=Homo sapiens OX=9606 GN=NUP35 PE=1 SV=1
642	TRUE	P62330|ARF6_HUMAN	2.43	38.86	5	5	Oxidation (M)	12428.7	12621.5	5265.86	4296.28	10155.8	7354.33	9704.2	9850.12	1.39:1.41:0.59:0.48:1.13:0.82:1.08:1.10	8653.08	9266.11	0.97:1.03	20082	ADP-ribosylation factor 6 OS=Homo sapiens OX=9606 GN=ARF6 PE=1 SV=2
304	TRUE	Q8WTV0|SCRB1_HUMAN	22.74	13.22	8	8	Oxidation (M)	40032.6	39081.7	32141.7	32977.1	18427	12256.9	23818.5	21442.4	1.45:1.42:1.17:1.20:0.67:0.45:0.87:0.78	36058.3	18986.2	1.31:0.69	60878	Scavenger receptor class B member 1 OS=Homo sapiens OX=9606 GN=SCARB1 PE=1 SV=1
851	TRUE	Q8NF37|PCAT1_HUMAN	21.37	9.55	5	5		3939.56	2776.8	2746.7	3355.39	6473.88	6657.75	4283.31	4891.46	0.90:0.63:0.63:0.76:1.47:1.52:0.98:1.11	3204.61	5576.6	0.73:1.27	59151	Lysophosphatidylcholine acyltransferase 1 OS=Homo sapiens OX=9606 GN=LPCAT1 PE=1 SV=2
799	TRUE	P28482|MK01_HUMAN	0.67	11.67	3	3	Acetylation (N-term); Oxidation (M)	4663.92	4408	709.027	634.106	1602.17	907.609	2030.77	2020.29	2.20:2.08:0.33:0.30:0.76:0.43:0.96:0.95	2884.57	1725.67	1.25:0.75	41390	Mitogen-activated protein kinase 1 OS=Homo sapiens OX=9606 GN=MAPK1 PE=1 SV=3
612	TRUE	P30419|NMT1_HUMAN	3.41	13.71	4	4	Oxidation (M)	2412.59	2485.42	879.394	779.161	2113.2	1157.03	1804.69	3051.37	1.31:1.35:0.48:0.42:1.15:0.63:0.98:1.66	1955.78	2061.51	0.97:1.03	56806	Glycylpeptide N-tetradecanoyltransferase 1 OS=Homo sapiens OX=9606 GN=NMT1 PE=1 SV=2
274	TRUE	O43815|STRN_HUMAN	1.64	27.44	13	13	Acetylation (N-term); Carbamidomethylation; Oxidation (M)	6850.23	7853.39	1135.42	1191.68	4664.8	1745.02	5563.4	4393.22	1.64:1.88:0.27:0.29:1.12:0.42:1.33:1.05	5786.77	4181.74	1.16:0.84	86132	Striatin OS=Homo sapiens OX=9606 GN=STRN PE=1 SV=4
601	TRUE	P33121|ACSL1_HUMAN	1.81	11.03	7	7	Acetylation (N-term); Oxidation (M)	2456.56	2413.93	807.972	852.865	2013.97	1552.02	1419.9	1664.34	1.49:1.47:0.49:0.52:1.22:0.94:0.86:1.01	1632.83	1662.56	0.99:1.01	77943	Long-chain-fatty-acid--CoA ligase 1 OS=Homo sapiens OX=9606 GN=ACSL1 PE=1 SV=1
149	TRUE	Q08554|DSC1_HUMAN	0.33	4.81	4	4		2769.46	2602.08	1082.29	1191.71	1376.84	1110.63	2427.23	2850.7	1.44:1.35:0.56:0.62:0.71:0.58:1.26:1.48	1911.39	1941.35	0.99:1.01	99987	Desmocollin-1 OS=Homo sapiens OX=9606 GN=DSC1 PE=1 SV=2
560	TRUE	Q92692|NECT2_HUMAN	0.4	18.03	6	6	Carbamidomethylation; Oxidation (M)	16699	14865	4775.65	4583.73	11314.5	4226.87	11740.4	11791.7	1.67:1.49:0.48:0.46:1.13:0.42:1.17:1.18	10230.8	9768.36	1.02:0.98	57742	Nectin-2 OS=Homo sapiens OX=9606 GN=NECTIN2 PE=1 SV=1
118	TRUE	P54652|HSP72_HUMAN	30.15	13.77	23	7	Oxidation (M)	1011.88	1208.08	891.311	831.574	3612.27	2905.56	3515.95	1813.24	0.51:0.61:0.45:0.42:1.83:1.47:1.78:0.92	985.71	2961.75	0.50:1.50	70021	Heat shock-related 70 kDa protein 2 OS=Homo sapiens OX=9606 GN=HSPA2 PE=1 SV=1
739	TRUE	Q16513|PKN2_HUMAN	4.9	6.2	6	5	Oxidation (M)	606.647	1458.94	379.173	352.117	1253.94	454.565	986.568	1188.08	0.73:1.75:0.45:0.42:1.50:0.54:1.18:1.42	786.342	1072.76	0.85:1.15	112035	Serine/threonine-protein kinase N2 OS=Homo sapiens OX=9606 GN=PKN2 PE=1 SV=1
673	TRUE	Q8WXX5|DNJC9_HUMAN	25.63	34.62	6	6	Oxidation (M)	1586.69	1225.79	672.685	1019.49	21124	3192.78	10367.2	8511.84	0.27:0.21:0.11:0.17:3.54:0.54:1.74:1.43	1283.95	10798.9	0.21:1.79	29910	DnaJ homolog subfamily C member 9 OS=Homo sapiens OX=9606 GN=DNAJC9 PE=1 SV=1
1135	TRUE	Q0VDF9|HSP7E_HUMAN	5.03	4.52	2	2		645.855	761.846	198.45	225.59	503.245	430.437	596.603	929.944	1.20:1.42:0.37:0.42:0.94:0.80:1.11:1.73	457.935	615.057	0.85:1.15	54794	Heat shock 70 kDa protein 14 OS=Homo sapiens OX=9606 GN=HSPA14 PE=1 SV=1
232	TRUE	P01130|LDLR_HUMAN	4.58	16.51	12	12	Carbamidomethylation; Oxidation (M)	45487.9	41067.3	8312.34	9728.32	34006.2	17835.4	41294.8	46708.8	1.49:1.34:0.27:0.32:1.11:0.58:1.35:1.53	26149	34961.3	0.86:1.14	95376	Low-density lipoprotein receptor OS=Homo sapiens OX=9606 GN=LDLR PE=1 SV=1
372	TRUE	P04626|ERBB2_HUMAN	4.84	8.45	11	9	Oxidation (M)	2309.34	1457.11	882.276	1161.43	1740.4	796.823	3470.23	4835.19	1.11:0.70:0.42:0.56:0.84:0.38:1.67:2.32	1481.59	2746.35	0.70:1.30	137910	Receptor tyrosine-protein kinase erbB-2 OS=Homo sapiens OX=9606 GN=ERBB2 PE=1 SV=1
527	TRUE	Q02487|DSC2_HUMAN	14.36	9.43	7	6	Oxidation (M)	980.282	1037.21	273.034	338.804	1376.6	986.197	3381.83	4743.99	0.60:0.63:0.17:0.21:0.84:0.60:2.06:2.89	869.657	2622.15	0.50:1.50	99962	Desmocollin-2 OS=Homo sapiens OX=9606 GN=DSC2 PE=1 SV=1
770	TRUE	P05121|PAI1_HUMAN	0.5	7.21	2	2		858.305	1149.14	230.904	88.7665	452.867	316.211	423.892	471.008	1.72:2.30:0.46:0.18:0.91:0.63:0.85:0.94	844.912	415.995	1.34:0.66	45060	Plasminogen activator inhibitor 1 OS=Homo sapiens OX=9606 GN=SERPINE1 PE=1 SV=1
636	TRUE	O15144|ARPC2_HUMAN	3.91	15.67	4	4	Oxidation (M)	1651.31	2698.32	898.235	415.323	1190.02	1847.86	896.767	8155.08	0.74:1.22:0.40:0.19:0.54:0.83:0.40:3.67	1540.11	3748.16	0.58:1.42	34333	Actin-related protein 2/3 complex subunit 2 OS=Homo sapiens OX=9606 GN=ARPC2 PE=1 SV=1
717	TRUE	Q96S59|RANB9_HUMAN	5.46	9.47	5	5	Oxidation (M)	13450.7	2042.25	498.766	508.534	22768.9	2445.82	1056.65	20228.5	1.71:0.26:0.06:0.06:2.89:0.31:0.13:2.57	4125.06	11625	0.52:1.48	77847	Ran-binding protein 9 OS=Homo sapiens OX=9606 GN=RANBP9 PE=1 SV=1
818	TRUE	P61225|RAP2B_HUMAN	7.65	22.95	4	3		4171.93	3792.48	1788.77	1626.96	3862.63	2398.39	5844.56	7449.38	1.08:0.98:0.46:0.42:1.00:0.62:1.51:1.93	2845.04	4888.74	0.74:1.26	20504	Ras-related protein Rap-2b OS=Homo sapiens OX=9606 GN=RAP2B PE=1 SV=1
332	TRUE	P56199|ITA1_HUMAN	35.36	13.49	10	10	Carbamidomethylation; Oxidation (M)	2108.32	1633.6	1939.67	1652.41	4056.86	6134.25	4367.23	3871.46	0.65:0.51:0.60:0.51:1.26:1.90:1.36:1.20	1974.11	4716.14	0.59:1.41	130848	Integrin alpha-1 OS=Homo sapiens OX=9606 GN=ITGA1 PE=1 SV=2
202	TRUE	Q9UKV3|ACINU_HUMAN	1.46	18.79	17	17	Acetylation (N-term); Carbamidomethylation	13484.8	9479.62	3425.38	3000.55	5022.75	4645.35	5970	5295.39	2.14:1.51:0.54:0.48:0.80:0.74:0.95:0.84	7347.58	5233.37	1.17:0.83	151862	Apoptotic chromatin condensation inducer in the nucleus OS=Homo sapiens OX=9606 GN=ACIN1 PE=1 SV=2
407	TRUE	Q9ULV3|CIZ1_HUMAN	2.94	12.81	8	8		4161.53	3768.9	276.89	355.026	842.586	397.588	916.826	595.631	2.94:2.66:0.20:0.25:0.60:0.28:0.65:0.42	2698.69	747.695	1.57:0.43	100045	Cip1-interacting zinc finger protein OS=Homo sapiens OX=9606 GN=CIZ1 PE=1 SV=2
566	TRUE	Q9UL25|RAB21_HUMAN	0.79	36.44	7	6	Carbamidomethylation	7571.45	7549.85	1274.58	925.61	4600.6	1762.22	3535.49	3986.24	1.94:1.94:0.33:0.24:1.18:0.45:0.91:1.02	4330.37	3471.14	1.11:0.89	24348	Ras-related protein Rab-21 OS=Homo sapiens OX=9606 GN=RAB21 PE=1 SV=3
595	TRUE	O00299|CLIC1_HUMAN	2.36	30.29	7	6	Carbamidomethylation; Oxidation (M)	24966.2	24778.2	4634.07	4997.59	20066.5	12572.4	12406.2	14269.4	1.68:1.67:0.31:0.34:1.35:0.85:0.84:0.96	14844	14828.6	1.00:1.00	26923	Chloride intracellular channel protein 1 OS=Homo sapiens OX=9606 GN=CLIC1 PE=1 SV=4
598	TRUE	Q8N0X7|SPART_HUMAN	3.35	18.17	7	7		5616.4	6046.17	1380.02	1992.44	3488.91	2043.61	1862.44	2014.29	1.84:1.98:0.45:0.65:1.14:0.67:0.61:0.66	3758.76	2352.31	1.23:0.77	72833	Spartin OS=Homo sapiens OX=9606 GN=SPART PE=1 SV=1
973	TRUE	P24666|PPAC_HUMAN	4.27	25.95	3	3		11498.5	10044.5	2422.23	2283	9551.23	5781.35	8694.02	7569.71	1.59:1.39:0.33:0.32:1.32:0.80:1.20:1.05	6562.04	7899.08	0.91:1.09	18042	Low molecular weight phosphotyrosine protein phosphatase OS=Homo sapiens OX=9606 GN=ACP1 PE=1 SV=3
103	TRUE	P22223|CADH3_HUMAN	2.19	34.74	24	23	Oxidation (M)	77471.2	71872.5	32363.8	32163.2	68117.3	60634.8	47635.6	51572.2	1.40:1.30:0.59:0.58:1.23:1.10:0.86:0.93	53467.7	56990	0.97:1.03	91418	Cadherin-3 OS=Homo sapiens OX=9606 GN=CDH3 PE=1 SV=2
876	TRUE	P46019|KPB2_HUMAN	0.41	4.05	3	3	Oxidation (M)	1774.17	2478.14	366.473	314.833	882.783	691.816	977.068	1100.04	1.65:2.31:0.34:0.29:0.82:0.64:0.91:1.03	1505.39	937.67	1.23:0.77	138408	Phosphorylase b kinase regulatory subunit alpha, liver isoform OS=Homo sapiens OX=9606 GN=PHKA2 PE=1 SV=1
942	TRUE	Q8NAN2|MIGA1_HUMAN	1.73	8.54	3	3		3074.5	3013.26	145.956	200.034	1290.27	481.848	1377.05	1504.97	2.22:2.17:0.11:0.14:0.93:0.35:0.99:1.09	2367.18	1163.53	1.34:0.66	71006	Mitoguardin 1 OS=Homo sapiens OX=9606 GN=MIGA1 PE=1 SV=1
603	TRUE	Q6N022|TEN4_HUMAN	5.66	2.82	7	6	Oxidation (M)	5229.83	4764.82	807.168	318.758	840.223	807.129	527.885	616.288	3.01:2.74:0.46:0.18:0.48:0.46:0.30:0.35	3917.86	734.845	1.68:0.32	307957	Teneurin-4 OS=Homo sapiens OX=9606 GN=TENM4 PE=1 SV=2
496	TRUE	P11413|G6PD_HUMAN	4.89	22.14	9	9	Carbamidomethylation	4302.34	4368.6	1191.95	1109.49	4247.74	3004.95	3237.11	3219.73	1.39:1.42:0.39:0.36:1.38:0.97:1.05:1.04	2743.1	3427.38	0.89:1.11	59257	Glucose-6-phosphate 1-dehydrogenase OS=Homo sapiens OX=9606 GN=G6PD PE=1 SV=4
1151	TRUE	Q9UEY8|ADDG_HUMAN	5.87	2.83	2	2	Oxidation (M)	694.085	467.724	150.724	205.905	617.671	451.703	393.977	578.79	1.56:1.05:0.34:0.46:1.39:1.01:0.89:1.30	379.61	510.535	0.85:1.15	79155	Gamma-adducin OS=Homo sapiens OX=9606 GN=ADD3 PE=1 SV=1
289	TRUE	P50570|DYN2_HUMAN	0.96	19.89	13	13	Carbamidomethylation; Oxidation (M)	4254.28	4056.25	1872.57	3106.13	2406.03	4440.1	2927.64	4116.6	1.25:1.19:0.55:0.91:0.71:1.31:0.86:1.21	3322.31	3472.59	0.98:1.02	98064	Dynamin-2 OS=Homo sapiens OX=9606 GN=DNM2 PE=1 SV=2
857	TRUE	O15431|COPT1_HUMAN	6.82	15.79	2	2	Carbamidomethylation; Oxidation (M)	29153.8	33860.3	8067.91	11255.2	5130.95	9255.97	11360.2	15385.5	1.89:2.19:0.52:0.73:0.33:0.60:0.74:1.00	20584.3	10283.2	1.33:0.67	21091	High affinity copper uptake protein 1 OS=Homo sapiens OX=9606 GN=SLC31A1 PE=1 SV=1
361	TRUE	P49023|PAXI_HUMAN	9.61	24.2	10	10	Carbamidomethylation; Oxidation (M)	9840.85	7939.7	4861.23	4116.49	12469.5	6733.11	10158.8	11718	1.16:0.94:0.57:0.49:1.47:0.79:1.20:1.38	6689.57	10269.8	0.79:1.21	64505	Paxillin OS=Homo sapiens OX=9606 GN=PXN PE=1 SV=3
689	TRUE	Q96BM9|ARL8A_HUMAN	2.89	38.71	6	6	Oxidation (M)	8368.23	9710.52	1396.92	1410.13	7679.88	3346.85	4903.04	6118.34	1.56:1.81:0.26:0.26:1.43:0.62:0.91:1.14	5221.45	5512.03	0.97:1.03	21416	ADP-ribosylation factor-like protein 8A OS=Homo sapiens OX=9606 GN=ARL8A PE=1 SV=1
119	TRUE	O75165|DJC13_HUMAN	14.46	14.53	24	24	Carbamidomethylation; Oxidation (M)	3942.05	4568.16	2310.75	1532.92	1303.18	1576.22	1450.38	1380.7	1.75:2.02:1.02:0.68:0.58:0.70:0.64:0.61	3088.47	1427.62	1.37:0.63	254415	DnaJ homolog subfamily C member 13 OS=Homo sapiens OX=9606 GN=DNAJC13 PE=1 SV=5
550	TRUE	Q8N884|CGAS_HUMAN	0.85	17.24	8	8	Oxidation (M)	8418.05	7043.44	1382.7	1505.87	6438.95	2452.21	4488.57	2873.91	1.95:1.63:0.32:0.35:1.49:0.57:1.04:0.66	4587.51	4063.41	1.06:0.94	58814	Cyclic GMP-AMP synthase OS=Homo sapiens OX=9606 GN=CGAS PE=1 SV=2
432	TRUE	Q969P0|IGSF8_HUMAN	5.71	10.77	5	5		3386.8	2925.36	855.106	942.132	4881.28	1702.15	2062.69	4082.57	1.30:1.12:0.33:0.36:1.87:0.65:0.79:1.57	2027.35	3182.17	0.78:1.22	65034	Immunoglobulin superfamily member 8 OS=Homo sapiens OX=9606 GN=IGSF8 PE=1 SV=1
311	TRUE	Q96KP1|EXOC2_HUMAN	0.88	13.85	10	10	Oxidation (M)	8782.93	8637.61	1474.42	1238.26	4809.57	2744.86	4545.84	3947.77	1.94:1.91:0.33:0.27:1.06:0.61:1.01:0.87	5033.3	4012.01	1.11:0.89	104066	Exocyst complex component 2 OS=Homo sapiens OX=9606 GN=EXOC2 PE=1 SV=1
913	TRUE	Q8IY63|AMOL1_HUMAN	21.95	3.87	3	3		948.005	739.475	0	0	215.53	153.726	323.372	258.247	2.87:2.24:0.00:0.00:0.65:0.47:0.98:0.78	843.74	237.719	1.56:0.44	106574	Angiomotin-like protein 1 OS=Homo sapiens OX=9606 GN=AMOTL1 PE=1 SV=1
34	TRUE	P13645|K1C10_HUMAN	13.37	53.08	39	37	Carbamidomethylation; Oxidation (M)	164491	149295	72651.1	75030.3	209164	133225	288428	349500	0.91:0.83:0.40:0.42:1.16:0.74:1.60:1.94	115367	245079	0.64:1.36	58827	Keratin, type I cytoskeletal 10 OS=Homo sapiens OX=9606 GN=KRT10 PE=1 SV=6
140	TRUE	Q9UHB6|LIMA1_HUMAN	0.61	40.05	25	25	Oxidation (M)	72673.3	79175.5	9235.61	10794.4	40983.8	23340	29591.2	30654.8	1.96:2.14:0.25:0.29:1.11:0.63:0.80:0.83	42969.7	31142.4	1.16:0.84	85226	LIM domain and actin-binding protein 1 OS=Homo sapiens OX=9606 GN=LIMA1 PE=1 SV=1
985	TRUE	P62942|FKB1A_HUMAN	0.43	25	2	2	Oxidation (M)	2288.18	1365.44	392.031	445.432	1222.19	769.204	540.596	854.455	2.32:1.39:0.40:0.45:1.24:0.78:0.55:0.87	1122.77	846.612	1.14:0.86	11951	Peptidyl-prolyl cis-trans isomerase FKBP1A OS=Homo sapiens OX=9606 GN=FKBP1A PE=1 SV=2
932	TRUE	O75689|ADAP1_HUMAN	14.2	9.36	4	3		622.785	700.011	382.445	445.915	1394.56	529.721	2326.68	2256.35	0.58:0.65:0.35:0.41:1.29:0.49:2.15:2.08	580.515	1665.57	0.52:1.48	43395	Arf-GAP with dual PH domain-containing protein 1 OS=Homo sapiens OX=9606 GN=ADAP1 PE=1 SV=2
312	TRUE	O95359|TACC2_HUMAN	13.42	3.49	7	7	Oxidation (M)	1068.31	1212.99	290.074	182.661	2458.35	938.431	2193.68	3057.34	0.75:0.85:0.20:0.13:1.72:0.66:1.54:2.15	824.337	2161.95	0.55:1.45	309427	Transforming acidic coiled-coil-containing protein 2 OS=Homo sapiens OX=9606 GN=TACC2 PE=1 SV=3
235	TRUE	P32926|DSG3_HUMAN	31.12	20.82	15	15	Oxidation (M)	3165.12	2414.6	1287.93	1479.42	12626.1	6760.86	8720.68	12257.1	0.52:0.40:0.21:0.24:2.07:1.11:1.43:2.01	2086.77	10091.2	0.34:1.66	107533	Desmoglein-3 OS=Homo sapiens OX=9606 GN=DSG3 PE=1 SV=2
840	TRUE	P11279|LAMP1_HUMAN	17.21	8.15	4	4		5054.81	5450.55	4111.86	5031.98	9161.15	5421.03	12116.2	9201.45	0.73:0.78:0.59:0.72:1.32:0.78:1.74:1.33	4951.89	9112.87	0.70:1.30	44882	Lysosome-associated membrane glycoprotein 1 OS=Homo sapiens OX=9606 GN=LAMP1 PE=1 SV=3
67	TRUE	Q13308|PTK7_HUMAN	18.94	40.19	36	36	Carbamidomethylation; Oxidation (M)	73270.9	71512	36228.3	37435.7	130413	81507	119747	133754	0.86:0.84:0.42:0.44:1.53:0.95:1.40:1.56	54611.7	116355	0.64:1.36	118392	Inactive tyrosine-protein kinase 7 OS=Homo sapiens OX=9606 GN=PTK7 PE=1 SV=2
728	TRUE	Q9UK41|VPS28_HUMAN	3.45	23.53	3	3	Acetylation (N-term); Oxidation (M)	7274.85	10285.1	1526.67	2287.75	8820.31	4217.06	5793.54	5682.88	1.27:1.79:0.27:0.40:1.54:0.74:1.01:0.99	5343.59	6128.45	0.93:1.07	25425	Vacuolar protein sorting-associated protein 28 homolog OS=Homo sapiens OX=9606 GN=VPS28 PE=1 SV=1
273	TRUE	Q96TA1|NIBA2_HUMAN	0.09	21.85	11	11	Oxidation (M)	6556	6549.26	912.443	1252.46	3847.19	1651.78	2231.87	3673.32	1.97:1.96:0.27:0.38:1.15:0.50:0.67:1.10	3817.54	2851.04	1.14:0.86	84138	Protein Niban 2 OS=Homo sapiens OX=9606 GN=NIBAN2 PE=1 SV=3
254	TRUE	Q08174|PCDH1_HUMAN	12.56	21.51	16	16	Oxidation (M)	4459.68	6986.2	1269.23	1583.57	9722.33	5378.44	7255.25	10162.9	0.76:1.19:0.22:0.27:1.66:0.92:1.24:1.74	3574.67	8129.74	0.61:1.39	114743	Protocadherin-1 OS=Homo sapiens OX=9606 GN=PCDH1 PE=1 SV=2
924	TRUE	O94910|AGRL1_HUMAN	40.89	2.99	3	3	Oxidation (M)	540.807	511.466	70.9781	79.7315	0	0	0	0	3.60:3.40:0.47:0.53:0.00:0.00:0.00:0.00	437.976	0	2.00:0.00	162717	Adhesion G protein-coupled receptor L1 OS=Homo sapiens OX=9606 GN=ADGRL1 PE=1 SV=1
1248	TRUE	Q15390|MTFR1_HUMAN	2.16	8.41	2	2		1042.98	984.48	387.032	364.975	766.305	540.171	822.45	822.678	1.46:1.37:0.54:0.51:1.07:0.75:1.15:1.15	694.866	737.901	0.97:1.03	37000	Mitochondrial fission regulator 1 OS=Homo sapiens OX=9606 GN=MTFR1 PE=1 SV=2
275	TRUE	O14936|CSKP_HUMAN	10.04	16.31	11	11		2334.54	2046.59	639.057	299.164	2829.29	1680.91	3520.09	3059.09	1.14:1.00:0.31:0.15:1.38:0.82:1.72:1.49	1667.74	2948.6	0.72:1.28	105123	Peripheral plasma membrane protein CASK OS=Homo sapiens OX=9606 GN=CASK PE=1 SV=3
90	TRUE	Q15075|EEA1_HUMAN	0.68	29.06	32	32	Oxidation (M)	5657.17	5312.71	1187.56	1092.01	3964.31	1005.44	3637.86	4131.95	1.74:1.64:0.37:0.34:1.22:0.31:1.12:1.27	3312.36	3184.89	1.02:0.98	162466	Early endosome antigen 1 OS=Homo sapiens OX=9606 GN=EEA1 PE=1 SV=2
128	TRUE	P04792|HSPB1_HUMAN	59.93	78.54	22	22	Oxidation (M)	81541.8	76533.3	72923.2	73892.3	363425	320490	458640	408835	0.35:0.33:0.31:0.32:1.57:1.38:1.98:1.76	76222.6	387847	0.33:1.67	22783	Heat shock protein beta-1 OS=Homo sapiens OX=9606 GN=HSPB1 PE=1 SV=2
1055	TRUE	O00264|PGRC1_HUMAN	0.15	17.44	2	2		8721.38	8578.35	1717.88	1759.05	4663.6	3380.33	3609.9	3658.07	1.93:1.90:0.38:0.39:1.03:0.75:0.80:0.81	5268.67	3827.97	1.16:0.84	21671	Membrane-associated progesterone receptor component 1 OS=Homo sapiens OX=9606 GN=PGRMC1 PE=1 SV=3
461	TRUE	Q9BQL6|FERM1_HUMAN	0.51	11.82	7	7	Oxidation (M)	2450.11	1120.58	499.867	919.879	1636.62	771.35	990.015	814.319	2.13:0.97:0.43:0.80:1.42:0.67:0.86:0.71	1247.61	1053.08	1.08:0.92	77437	Fermitin family homolog 1 OS=Homo sapiens OX=9606 GN=FERMT1 PE=1 SV=1
518	TRUE	P35237|SPB6_HUMAN	1.76	29.79	8	8	Oxidation (M)	3443.13	3825.74	803.575	532.922	3959.18	1482.47	1808.8	1451.59	1.59:1.77:0.37:0.25:1.83:0.69:0.84:0.67	2479.61	2175.51	1.07:0.93	42622	Serpin B6 OS=Homo sapiens OX=9606 GN=SERPINB6 PE=1 SV=3
36	TRUE	P35222|CTNB1_HUMAN	2.98	54.42	41	34	Acetylation (N-term); Carbamidomethylation; Oxidation (M)	146588	143551	120159	117955	166209	162576	159199	101061	1.05:1.03:0.86:0.84:1.19:1.16:1.14:0.72	132126	147261	0.95:1.05	85497	Catenin beta-1 OS=Homo sapiens OX=9606 GN=CTNNB1 PE=1 SV=1
1046	TRUE	P28908|TNR8_HUMAN	27.81	5.38	3	3		19005.6	18328.6	2747.32	3915.07	588.809	468.5	422.288	500.308	3.31:3.19:0.48:0.68:0.10:0.08:0.07:0.09	10999.1	494.976	1.91:0.09	63747	Tumor necrosis factor receptor superfamily member 8 OS=Homo sapiens OX=9606 GN=TNFRSF8 PE=1 SV=1
250	TRUE	O94973|AP2A2_HUMAN	4.64	11.08	12	7	Oxidation (M)	2937.45	3645.72	529772	710.374	2970.36	2025.67	1696.93	954.908	0.04:0.05:7.78:0.02:0.04:0.03:0.02:0.02	134266	1911.97	1.97:0.03	103960	AP-2 complex subunit alpha-2 OS=Homo sapiens OX=9606 GN=AP2A2 PE=1 SV=2
409	TRUE	P21281|VATB2_HUMAN	0.29	25.64	9	9	Carbamidomethylation; Oxidation (M)	7959.15	8787.22	1526.16	1950.29	4665.06	1526.09	4549.88	5355.57	1.75:1.94:0.34:0.43:1.03:0.34:1.00:1.18	5055.71	4024.15	1.11:0.89	56501	V-type proton ATPase subunit B, brain isoform OS=Homo sapiens OX=9606 GN=ATP6V1B2 PE=1 SV=3
1014	TRUE	Q6UWB1|I27RA_HUMAN	15.26	5.82	2	2		1506.71	1444.67	1651.89	1714.98	505.615	1598.23	439.021	324.853	1.31:1.26:1.44:1.49:0.44:1.39:0.38:0.28	1579.56	716.93	1.38:0.62	69474	Interleukin-27 receptor subunit alpha OS=Homo sapiens OX=9606 GN=IL27RA PE=1 SV=2
421	TRUE	Q9UKA4|AKA11_HUMAN	0.18	4.89	7	7	Oxidation (M)	2821.47	2566.49	161.281	139.746	1123.17	289.746	775.09	537.268	2.68:2.44:0.15:0.13:1.07:0.28:0.74:0.51	1651.76	726.081	1.39:0.61	210512	A-kinase anchor protein 11 OS=Homo sapiens OX=9606 GN=AKAP11 PE=1 SV=1
359	TRUE	Q96I99|SUCB2_HUMAN	1.13	30.32	11	11	Oxidation (M)	3662.8	4177.03	4855.92	3566.63	3347.55	1786.11	5315.88	5919.74	0.90:1.02:1.19:0.87:0.82:0.44:1.30:1.45	4065.6	4092.32	1.00:1.00	46511	Succinate--CoA ligase [GDP-forming] subunit beta, mitochondrial OS=Homo sapiens OX=9606 GN=SUCLG2 PE=1 SV=2
48	TRUE	P35221|CTNA1_HUMAN	8.31	51.21	40	32	Acetylation (N-term); Carbamidomethylation; Oxidation (M)	198229	209755	101852	92479.2	262268	167951	196803	215065	1.10:1.16:0.56:0.51:1.45:0.93:1.09:1.19	150579	210522	0.83:1.17	100071	Catenin alpha-1 OS=Homo sapiens OX=9606 GN=CTNNA1 PE=1 SV=1
585	TRUE	Q92673|SORL_HUMAN	6.28	2.03	3	3		322.465	435.59	3432.69	940.09	5512.02	1265.87	1380.57	1350.64	0.18:0.24:1.88:0.51:3.01:0.69:0.75:0.74	1333.66	2377.27	0.72:1.28	248426	Sortilin-related receptor OS=Homo sapiens OX=9606 GN=SORL1 PE=1 SV=2
544	TRUE	Q8TCT9|HM13_HUMAN	7.19	18.83	7	7	Oxidation (M)	10461.1	13636.2	6399.65	5507.99	13181.6	12347.4	10211.6	10990	1.01:1.32:0.62:0.53:1.27:1.19:0.99:1.06	9001.23	11682.7	0.87:1.13	41488	Minor histocompatibility antigen H13 OS=Homo sapiens OX=9606 GN=HM13 PE=1 SV=1
687	TRUE	Q13671|RIN1_HUMAN	0.51	9.2	5	5		4634.43	4169.32	943.371	785.745	2483.28	1806.99	1228.91	1946.32	2.06:1.85:0.42:0.35:1.10:0.80:0.55:0.87	2633.22	1866.38	1.17:0.83	84099	Ras and Rab interactor 1 OS=Homo sapiens OX=9606 GN=RIN1 PE=1 SV=4
813	TRUE	Q96MU7|YTDC1_HUMAN	2.18	6.46	4	4		9965.2	9090.49	1197.6	270.866	1769.09	574.299	1567.33	2464.13	2.96:2.70:0.36:0.08:0.53:0.17:0.47:0.73	6224.23	1894.22	1.53:0.47	84700	YTH domain-containing protein 1 OS=Homo sapiens OX=9606 GN=YTHDC1 PE=1 SV=3
8	TRUE	P13647|K2C5_HUMAN	38.51	50.68	77	60	Carbamidomethylation; Oxidation (M)	368927	354379	289702	296124	698350	622190	878329	758440	0.69:0.66:0.54:0.56:1.31:1.17:1.65:1.42	327283	739327	0.61:1.39	62378	Keratin, type II cytoskeletal 5 OS=Homo sapiens OX=9606 GN=KRT5 PE=1 SV=3
545	TRUE	Q5VWQ8|DAB2P_HUMAN	8.23	8.92	7	7	Oxidation (M)	2200.26	1827.11	567.989	791.644	3253.91	881.632	3605.63	4421.85	1.00:0.83:0.26:0.36:1.48:0.40:1.64:2.02	1346.75	3040.75	0.61:1.39	131625	Disabled homolog 2-interacting protein OS=Homo sapiens OX=9606 GN=DAB2IP PE=1 SV=2
109	TRUE	Q8IWT6|LRC8A_HUMAN	0.84	42.35	28	27	Carbamidomethylation; Oxidation (M)	72459.4	76127.1	16566.4	17270.2	32494.4	22890.1	35580.7	39490.6	1.85:1.95:0.42:0.44:0.83:0.59:0.91:1.01	45605.8	32613.9	1.17:0.83	94199	Volume-regulated anion channel subunit LRRC8A OS=Homo sapiens OX=9606 GN=LRRC8A PE=1 SV=1
413	TRUE	O75122|CLAP2_HUMAN	0.4	9.58	9	9	Oxidation (M)	1562.93	1988.42	580.462	596.433	1105.28	979.659	991.091	862.211	1.44:1.84:0.54:0.55:1.02:0.90:0.91:0.80	1265.18	984.561	1.12:0.88	141064	CLIP-associating protein 2 OS=Homo sapiens OX=9606 GN=CLASP2 PE=1 SV=3
420	TRUE	P06744|G6PI_HUMAN	4.49	18.28	6	6	Oxidation (M)	11531.2	10429.6	932.349	1988.25	3480.55	1236.05	1509.11	2403.2	2.75:2.49:0.22:0.47:0.83:0.30:0.36:0.57	6664	2157.23	1.51:0.49	63147	Glucose-6-phosphate isomerase OS=Homo sapiens OX=9606 GN=GPI PE=1 SV=4
587	TRUE	Q14108|SCRB2_HUMAN	1.27	4.6	2	2		730.626	964.478	2649.05	178.181	581.639	3527.09	631.306	667.291	0.59:0.78:2.13:0.14:0.47:2.84:0.51:0.54	1130.58	1351.83	0.91:1.09	54290	Lysosome membrane protein 2 OS=Homo sapiens OX=9606 GN=SCARB2 PE=1 SV=2
516	TRUE	P01040|CYTA_HUMAN	16.48	36.73	3	3		1429.61	1396.97	807.532	826.67	3147.01	1291.57	2784.02	3766.89	0.74:0.72:0.42:0.43:1.63:0.67:1.44:1.95	1115.2	2747.37	0.58:1.42	11006	Cystatin-A OS=Homo sapiens OX=9606 GN=CSTA PE=1 SV=1
1064	TRUE	O60779|S19A2_HUMAN	5.17	11.67	3	3	Oxidation (M)	2394.87	2617.92	214.669	175.684	282.346	88.0676	401.138	544.308	2.85:3.12:0.26:0.21:0.34:0.10:0.48:0.65	2160.72	392.537	1.69:0.31	55400	Thiamine transporter 1 OS=Homo sapiens OX=9606 GN=SLC19A2 PE=1 SV=2
796	TRUE	P26012|ITB8_HUMAN	13.67	10.4	5	5	Oxidation (M)	4140.27	4513.19	2005.27	1804.02	6066.06	3759.17	7343.78	9310.98	0.85:0.93:0.41:0.37:1.25:0.77:1.51:1.91	3115.69	6620	0.64:1.36	85632	Integrin beta-8 OS=Homo sapiens OX=9606 GN=ITGB8 PE=1 SV=1
70	TRUE	Q02952|AKA12_HUMAN	1.25	28.68	36	36	Oxidation (M)	15604.6	14998.1	893.466	1260.09	3597.36	3040.47	2742.44	3115.4	2.76:2.65:0.16:0.22:0.64:0.54:0.48:0.55	8189.06	3123.92	1.45:0.55	191482	A-kinase anchor protein 12 OS=Homo sapiens OX=9606 GN=AKAP12 PE=1 SV=4
348	TRUE	P40763|STAT3_HUMAN	10.38	19.09	10	10	Oxidation (M)	1789.84	1903.2	1133.64	1120.62	1302.36	659.906	1113.47	861.715	1.45:1.54:0.92:0.91:1.05:0.53:0.90:0.70	1486.83	984.362	1.20:0.80	88068	Signal transducer and activator of transcription 3 OS=Homo sapiens OX=9606 GN=STAT3 PE=1 SV=2
226	TRUE	P42356|PI4KA_HUMAN	2.37	5.42	9	9	Oxidation (M)	2378.68	2244.1	2437.46	1674.2	1981.29	4003.67	613.502	1770.12	1.11:1.05:1.14:0.78:0.93:1.87:0.29:0.83	2709.84	2092.15	1.13:0.87	236830	Phosphatidylinositol 4-kinase alpha OS=Homo sapiens OX=9606 GN=PI4KA PE=1 SV=4
562	TRUE	Q96RF0|SNX18_HUMAN	21.34	16.08	8	8	Oxidation (M)	1113.72	1169.28	1109.75	1112.82	4682.79	1850.93	1962.31	2835.29	0.56:0.59:0.56:0.56:2.37:0.93:0.99:1.43	1126.39	2832.83	0.57:1.43	68894	Sorting nexin-18 OS=Homo sapiens OX=9606 GN=SNX18 PE=1 SV=2
367	TRUE	Q14254|FLOT2_HUMAN	3.82	22.43	7	7	Oxidation (M)	5994.6	6098.71	1825.2	1953.06	5167.59	3001.23	5406.45	5623.88	1.37:1.39:0.42:0.45:1.18:0.68:1.23:1.28	3967.89	4799.79	0.91:1.09	47064	Flotillin-2 OS=Homo sapiens OX=9606 GN=FLOT2 PE=1 SV=2
661	TRUE	O95292|VAPB_HUMAN	11.81	30.04	7	6	Carbamidomethylation; Oxidation (M)	24384.8	25579.4	4969.53	6524.45	39774.6	21982.2	31104.7	46355.1	0.97:1.02:0.20:0.26:1.59:0.88:1.24:1.85	15364.5	34804.1	0.61:1.39	27228	Vesicle-associated membrane protein-associated protein B/C OS=Homo sapiens OX=9606 GN=VAPB PE=1 SV=3
763	TRUE	P13747|HLAE_HUMAN	9.28	6.98	5	2		830.201	1047.34	355.516	217.761	1365.1	785.657	803.766	1475.61	0.97:1.22:0.41:0.25:1.59:0.91:0.93:1.72	612.705	1107.53	0.71:1.29	40058	HLA class I histocompatibility antigen, alpha chain E OS=Homo sapiens OX=9606 GN=HLA-E PE=1 SV=4
445	TRUE	Q5D862|FILA2_HUMAN	10.22	0.96	2	2		1153.31	1077.95	192.806	166.309	913.907	906.434	1987.07	2829.34	1.00:0.93:0.17:0.14:0.79:0.79:1.72:2.45	744.007	1659.19	0.62:1.38	248073	Filaggrin-2 OS=Homo sapiens OX=9606 GN=FLG2 PE=1 SV=1
187	TRUE	Q15375|EPHA7_HUMAN	10.81	23.15	20	17	Oxidation (M)	8465.53	9819.09	67347.8	67854.8	121639	58625.5	164408	62111	0.12:0.14:0.96:0.97:1.74:0.84:2.35:0.89	38371.8	101696	0.55:1.45	112097	Ephrin type-A receptor 7 OS=Homo sapiens OX=9606 GN=EPHA7 PE=1 SV=3
217	TRUE	O95782|AP2A1_HUMAN	0.2	14.02	15	10	Oxidation (M)	4350.29	4359.05	2518.8	1494.79	2290.66	2974.31	3613.22	2718.32	1.43:1.43:0.83:0.49:0.75:0.98:1.19:0.89	3180.73	2899.13	1.05:0.95	107546	AP-2 complex subunit alpha-1 OS=Homo sapiens OX=9606 GN=AP2A1 PE=1 SV=3
198	TRUE	Q6P1M0|S27A4_HUMAN	3.18	30.48	18	18	Carbamidomethylation; Oxidation (M)	8701.19	8589.88	4453.34	5558.56	9503.76	4431.62	10205.6	9300.41	1.15:1.13:0.59:0.73:1.25:0.58:1.34:1.22	6825.74	8360.34	0.90:1.10	72064	Long-chain fatty acid transport protein 4 OS=Homo sapiens OX=9606 GN=SLC27A4 PE=1 SV=1
783	TRUE	Q6Q0C0|TRAF7_HUMAN	0.13	7.01	4	4		1137.82	1319.87	401.824	318.552	700.04	559.694	732.379	708.593	1.55:1.80:0.55:0.43:0.95:0.76:1.00:0.96	794.514	675.177	1.08:0.92	74609	E3 ubiquitin-protein ligase TRAF7 OS=Homo sapiens OX=9606 GN=TRAF7 PE=1 SV=1
1119	TRUE	Q9Y6W5|WASF2_HUMAN	10.44	6.43	2	2		1475.34	945.27	301.532	313.306	1954.44	870.637	1368.73	2063.39	1.27:0.81:0.26:0.27:1.68:0.75:1.18:1.78	758.863	1564.3	0.65:1.35	54284	Wiskott-Aldrich syndrome protein family member 2 OS=Homo sapiens OX=9606 GN=WASF2 PE=1 SV=3
610	TRUE	Q9Y4D1|DAAM1_HUMAN	0.16	4.92	5	5		10150	10282.3	916.67	320.436	1328.29	10788.7	1800.03	1445.11	2.19:2.22:0.20:0.07:0.29:2.33:0.39:0.31	7036.91	3840.54	1.29:0.71	123473	Disheveled-associated activator of morphogenesis 1 OS=Homo sapiens OX=9606 GN=DAAM1 PE=1 SV=2
553	TRUE	Q9HCM4|E41L5_HUMAN	14.54	9	7	5	Oxidation (M)	1892.75	1916.85	956.025	1072.91	4531.04	1469.72	4921.02	5641.89	0.68:0.68:0.34:0.38:1.62:0.52:1.76:2.01	1528.04	4235.77	0.53:1.47	81856	Band 4.1-like protein 5 OS=Homo sapiens OX=9606 GN=EPB41L5 PE=1 SV=3
793	TRUE	Q15599|NHRF2_HUMAN	0.04	17.51	4	4		3568.06	3599.09	152.208	1116.64	1295.2	2081.2	733.063	1146.11	2.08:2.10:0.09:0.65:0.76:1.22:0.43:0.67	2391.29	1362.81	1.27:0.73	37414	Na(+)/H(+) exchange regulatory cofactor NHE-RF2 OS=Homo sapiens OX=9606 GN=SLC9A3R2 PE=1 SV=2
680	TRUE	P0CG48|UBC_HUMAN	5.86	5.84	4	4		236990	243501	52837.1	54818.2	294498	193417	161961	172385	1.34:1.38:0.30:0.31:1.67:1.10:0.92:0.98	147036	205565	0.83:1.17	77039	Polyubiquitin-C OS=Homo sapiens OX=9606 GN=UBC PE=1 SV=3
535	TRUE	Q13464|ROCK1_HUMAN	6.14	3.47	5	4	Acetylation (N-term); Oxidation (M)	989.513	1150.81	1100.51	1169.17	1358.75	855.903	597.757	863.369	0.98:1.14:1.09:1.16:1.34:0.85:0.59:0.85	1102.5	918.944	1.09:0.91	158175	Rho-associated protein kinase 1 OS=Homo sapiens OX=9606 GN=ROCK1 PE=1 SV=1
586	TRUE	Q9UJU6|DBNL_HUMAN	1.92	22.56	7	7	Oxidation (M)	2896.17	2383.86	1758.57	1600.03	1390.24	1759.09	3467.69	4063.8	1.20:0.99:0.73:0.66:0.58:0.73:1.44:1.68	2159.66	2670.2	0.89:1.11	48207	Drebrin-like protein OS=Homo sapiens OX=9606 GN=DBNL PE=1 SV=1
104	TRUE	P33527|MRP1_HUMAN	2.8	22.93	25	25	Carbamidomethylation; Oxidation (M)	6239.61	6257.44	5489.34	5810.08	3616.67	7746.74	4258.23	6424.29	1.09:1.09:0.96:1.01:0.63:1.35:0.74:1.12	5949.12	5511.48	1.04:0.96	171591	Multidrug resistance-associated protein 1 OS=Homo sapiens OX=9606 GN=ABCC1 PE=1 SV=3
681	TRUE	P62491|RB11A_HUMAN	7.8	30.56	6	6	Acetylation (N-term)	8885.3	8990.99	3779.07	2763.63	7996.44	7441.6	9160.33	10978.6	1.18:1.20:0.50:0.37:1.07:0.99:1.22:1.46	6104.75	8894.25	0.81:1.19	24394	Ras-related protein Rab-11A OS=Homo sapiens OX=9606 GN=RAB11A PE=1 SV=3
901	TRUE	Q9NUT2|MITOS_HUMAN	6.69	7.35	4	4		2916.74	2037.53	107.453	1179.64	452.865	73.9797	561.127	315.036	3.05:2.13:0.11:1.23:0.47:0.08:0.59:0.33	2263.95	384.169	1.71:0.29	79989	Mitochondrial potassium channel ATP-binding subunit OS=Homo sapiens OX=9606 GN=ABCB8 PE=1 SV=3
648	TRUE	O43570|CAH12_HUMAN	18.47	19.21	5	5	Oxidation (M)	13962.5	14277.7	5287.71	6202.1	3361.23	882.771	2473.83	3289.39	2.25:2.30:0.85:1.00:0.54:0.14:0.40:0.53	9932.5	2650.97	1.58:0.42	39451	Carbonic anhydrase 12 OS=Homo sapiens OX=9606 GN=CA12 PE=1 SV=1
832	TRUE	Q9Y5V3|MAGD1_HUMAN	0.87	5.78	3	3		1578.72	2320.28	614.91	568.486	840.665	2418.59	480.15	822.616	1.31:1.92:0.51:0.47:0.70:2.01:0.40:0.68	1342.84	1167.91	1.07:0.93	86161	Melanoma-associated antigen D1 OS=Homo sapiens OX=9606 GN=MAGED1 PE=1 SV=3
209	TRUE	Q9Y6N7|ROBO1_HUMAN	33.27	16.54	19	19	Oxidation (M)	7056.49	8833.67	2774.86	2746.12	521.882	228.135	425.55	481.543	2.45:3.06:0.96:0.95:0.18:0.08:0.15:0.17	5352.78	414.277	1.86:0.14	180930	Roundabout homolog 1 OS=Homo sapiens OX=9606 GN=ROBO1 PE=1 SV=1
1120	TRUE	Q6P1M3|L2GL2_HUMAN	0.22	2.75	2	2		769.286	775.545	664.988	751.442	311.968	1817.02	1020	568.111	0.92:0.93:0.80:0.90:0.37:2.18:1.22:0.68	740.315	929.273	0.89:1.11	113448	LLGL scribble cell polarity complex component 2 OS=Homo sapiens OX=9606 GN=LLGL2 PE=1 SV=2
368	TRUE	P35232|PHB_HUMAN	0.12	47.06	9	9		28154.1	29577.3	7836.71	8264.02	22345.4	9714.88	14212.7	16504.6	1.65:1.73:0.46:0.48:1.31:0.57:0.83:0.97	18458	15694.4	1.08:0.92	29804	Prohibitin OS=Homo sapiens OX=9606 GN=PHB PE=1 SV=1
677	TRUE	Q14141|SEPT6_HUMAN	1.74	14.29	6	5	Oxidation (M)	5926.33	5559.96	568.193	580.593	3947.32	1602.61	2104.13	2823.44	2.05:1.92:0.20:0.20:1.37:0.55:0.73:0.98	3158.77	2619.38	1.09:0.91	49717	Septin-6 OS=Homo sapiens OX=9606 GN=SEPTIN6 PE=1 SV=4
124	TRUE	Q99959|PKP2_HUMAN	1.01	32.8	22	22	Carbamidomethylation; Oxidation (M)	28426.4	28195	9443.56	9805.35	19333.6	11116	13739	17375.9	1.65:1.64:0.55:0.57:1.13:0.65:0.80:1.01	18967.6	15391.1	1.10:0.90	97415	Plakophilin-2 OS=Homo sapiens OX=9606 GN=PKP2 PE=1 SV=2
376	TRUE	P10620|MGST1_HUMAN	0.83	42.58	4	4	Carbamidomethylation; Oxidation (M)	46034.9	43344.2	8938.32	11656.6	37328.6	19862.3	28511	15156.4	1.75:1.64:0.34:0.44:1.42:0.75:1.08:0.58	27990.5	25214.6	1.05:0.95	17599	Microsomal glutathione S-transferase 1 OS=Homo sapiens OX=9606 GN=MGST1 PE=1 SV=1
210	TRUE	Q8NI35|INADL_HUMAN	4.59	11.99	14	14		5608.02	5625	550.079	518.49	1886.07	176.225	865.587	992.843	2.77:2.77:0.27:0.26:0.93:0.09:0.43:0.49	3863.46	1073.6	1.57:0.43	196368	InaD-like protein OS=Homo sapiens OX=9606 GN=PATJ PE=1 SV=3
260	TRUE	P02787|TRFE_HUMAN	12.56	4.73	3	3		997.396	886.865	731.034	983.21	753.748	515.732	589.896	818.096	1.27:1.13:0.93:1.25:0.96:0.66:0.75:1.04	974.069	669.368	1.19:0.81	77064	Serotransferrin OS=Homo sapiens OX=9606 GN=TF PE=1 SV=3
365	TRUE	Q9BZQ8|NIBA1_HUMAN	11.65	14.12	10	10	Oxidation (M)	2443.04	3732.72	718.663	902.88	9113.32	3610.7	2369.1	5917.49	0.68:1.04:0.20:0.25:2.53:1.00:0.66:1.64	1949.33	5252.65	0.54:1.46	103135	Protein Niban 1 OS=Homo sapiens OX=9606 GN=NIBAN1 PE=1 SV=1
24	TRUE	Q9UPN3|MACF1_HUMAN	2.4	11.17	64	61	Oxidation (M)	182763	214723	12541.3	1610.93	135889	12958.9	71998.8	133771	1.91:2.24:0.13:0.02:1.42:0.14:0.75:1.40	102910	88654.4	1.07:0.93	838308	Microtubule-actin cross-linking factor 1, isoforms 1/2/3/5 OS=Homo sapiens OX=9606 GN=MACF1 PE=1 SV=4
843	TRUE	P07858|CATB_HUMAN	11.42	14.75	3	3	Oxidation (M)	3185.13	3858.57	810.523	773.564	621.179	427.125	479.149	999.269	2.28:2.77:0.58:0.55:0.45:0.31:0.34:0.72	2156.95	631.68	1.55:0.45	37822	Cathepsin B OS=Homo sapiens OX=9606 GN=CTSB PE=1 SV=3
357	TRUE	O14786|NRP1_HUMAN	3.53	18.74	12	12	Oxidation (M)	5592.6	6067.56	2437.05	2643.46	2282.54	1828.67	4306.53	4203.34	1.52:1.65:0.66:0.72:0.62:0.50:1.17:1.15	4888.84	3155.27	1.22:0.78	103134	Neuropilin-1 OS=Homo sapiens OX=9606 GN=NRP1 PE=1 SV=3
1001	TRUE	P04920|B3A2_HUMAN	1.2	1.93	2	2		781.172	752.399	82.1315	65.011	194.895	209.668	265.118	117.626	2.53:2.44:0.27:0.21:0.63:0.68:0.86:0.38	507.971	242.163	1.35:0.65	137009	Anion exchange protein 2 OS=Homo sapiens OX=9606 GN=SLC4A2 PE=1 SV=4
836	TRUE	Q86SQ4|AGRG6_HUMAN	1.79	4.75	4	4		1405.67	1388.88	706.064	783.905	914.151	726.066	1625.1	1669.51	1.22:1.21:0.61:0.68:0.79:0.63:1.41:1.45	1071.13	1233.71	0.93:1.07	136695	Adhesion G-protein coupled receptor G6 OS=Homo sapiens OX=9606 GN=ADGRG6 PE=1 SV=3
493	TRUE	P61020|RAB5B_HUMAN	6.83	27.44	7	4	Oxidation (M)	3089.26	2690.87	870.17	725.776	2839.35	1891.64	3173.04	2816.64	1.37:1.19:0.38:0.32:1.26:0.84:1.40:1.25	1844.02	2680.17	0.82:1.18	23707	Ras-related protein Rab-5B OS=Homo sapiens OX=9606 GN=RAB5B PE=1 SV=1
460	TRUE	Q13616|CUL1_HUMAN	2.37	12.11	7	7	Oxidation (M)	7302.78	6323.22	322.514	4160.85	2087.36	3965.02	738.847	1516.02	2.21:1.91:0.10:1.26:0.63:1.20:0.22:0.46	6709.02	2269.34	1.49:0.51	89679	Cullin-1 OS=Homo sapiens OX=9606 GN=CUL1 PE=1 SV=2
18	TRUE	Q00610|CLH1_HUMAN	0.23	39.16	65	50	Carbamidomethylation; Oxidation (M)	84395.1	93981.1	14366.1	14000.8	39882.9	19706.3	39353.8	44251.2	1.93:2.15:0.33:0.32:0.91:0.45:0.90:1.01	51685.8	35798.5	1.18:0.82	191615	Clathrin heavy chain 1 OS=Homo sapiens OX=9606 GN=CLTC PE=1 SV=5
1016	TRUE	P14174|MIF_HUMAN	3.29	17.39	2	2	Carbamidomethylation; Oxidation (M)	5061.81	7183.17	373.779	389.159	752.888	1978.36	540.309	450.965	2.42:3.43:0.18:0.19:0.36:0.95:0.26:0.22	3251.98	1029.65	1.52:0.48	12476	Macrophage migration inhibitory factor OS=Homo sapiens OX=9606 GN=MIF PE=1 SV=4
631	TRUE	P11532|DMD_HUMAN	5.16	0.54	5	2		950.192	1068.08	299.941	322.334	1346.11	931.164	548.834	812.187	1.21:1.36:0.38:0.41:1.72:1.19:0.70:1.03	660.136	909.574	0.84:1.16	426750	Dystrophin OS=Homo sapiens OX=9606 GN=DMD PE=1 SV=3
426	TRUE	Q13641|TPBG_HUMAN	5.67	18.1	8	8	Oxidation (M)	93752.3	76583.9	32116.3	32257.3	46397.7	41059.6	28653.6	31150.4	1.96:1.60:0.67:0.68:0.97:0.86:0.60:0.65	58677.4	36815.3	1.23:0.77	46032	Trophoblast glycoprotein OS=Homo sapiens OX=9606 GN=TPBG PE=1 SV=1
579	TRUE	Q9UHX3|AGRE2_HUMAN	25.8	8.75	5	5	Carbamidomethylation; Oxidation (M)	12194	13347	5942.3	7122.63	2481.9	4071.94	2155.69	1907.06	1.98:2.17:0.97:1.16:0.40:0.66:0.35:0.31	9651.49	2654.15	1.57:0.43	90472	Adhesion G protein-coupled receptor E2 OS=Homo sapiens OX=9606 GN=ADGRE2 PE=1 SV=2
141	TRUE	P46939|UTRO_HUMAN	2.23	4.11	15	11	Oxidation (M)	5073.95	1799.16	456.236	3299.02	1747.03	731.268	1685.33	1802.03	2.45:0.87:0.22:1.59:0.84:0.35:0.81:0.87	2657.09	1491.41	1.28:0.72	394466	Utrophin OS=Homo sapiens OX=9606 GN=UTRN PE=1 SV=2
189	TRUE	P08237|PFKAM_HUMAN	4.19	23.46	15	15	Oxidation (M)	37155	35032.2	7061.35	7440.79	18445.1	9793.55	7381.99	7435.02	2.29:2.16:0.44:0.46:1.14:0.60:0.46:0.46	22002.5	10763.9	1.34:0.66	85183	ATP-dependent 6-phosphofructokinase, muscle type OS=Homo sapiens OX=9606 GN=PFKM PE=1 SV=2
256	TRUE	P46821|MAP1B_HUMAN	0.96	4.86	9	9	Oxidation (M)	2439.91	2125.65	433.177	750.295	1220.88	972.178	766.07	1180.44	1.97:1.72:0.35:0.61:0.99:0.79:0.62:0.95	1437.26	1034.89	1.16:0.84	270634	Microtubule-associated protein 1B OS=Homo sapiens OX=9606 GN=MAP1B PE=1 SV=2
724	TRUE	Q8IXS6|PALM2_HUMAN	5.71	21.37	6	6		9965.69	10709.8	355.75	902.17	1328.35	244.765	961.583	1109.28	3.12:3.35:0.11:0.28:0.42:0.08:0.30:0.35	6067.6	1023.63	1.71:0.29	42185	Paralemmin-2 OS=Homo sapiens OX=9606 GN=PALM2 PE=1 SV=3
47	TRUE	P68104|EF1A1_HUMAN	2.04	59.74	39	39	Acetylation (N-term); Carbamidomethylation; Oxidation (M)	668291	766257	178436	224895	454640	331642	233347	255647	1.72:1.97:0.46:0.58:1.17:0.85:0.60:0.66	459470	318819	1.18:0.82	50141	Elongation factor 1-alpha 1 OS=Homo sapiens OX=9606 GN=EEF1A1 PE=1 SV=1
276	TRUE	P78310|CXAR_HUMAN	9.77	52.05	13	13	Acetylation (N-term); Carbamidomethylation; Oxidation (M)	10094.5	10706.5	4132.87	3356.53	16452.7	7070.34	13788.6	13748.6	1.02:1.08:0.42:0.34:1.66:0.71:1.39:1.39	7072.62	12765.1	0.71:1.29	40030	Coxsackievirus and adenovirus receptor OS=Homo sapiens OX=9606 GN=CXADR PE=1 SV=1
988	TRUE	O15121|DEGS1_HUMAN	1.6	15.79	3	3	Oxidation (M)	6175.09	2531.17	386.758	291.097	1871.49	1108.02	1321.25	2260.46	3.10:1.27:0.19:0.15:0.94:0.56:0.66:1.13	2874.74	1817.88	1.23:0.77	37866	Sphingolipid delta(4)-desaturase DES1 OS=Homo sapiens OX=9606 GN=DEGS1 PE=1 SV=1
63	TRUE	Q9BSJ8|ESYT1_HUMAN	5.36	39.13	37	37	Carbamidomethylation; Oxidation (M)	40348.4	38813.7	11640	9652.05	34907	23153.3	37475	36785.2	1.39:1.33:0.40:0.33:1.20:0.80:1.29:1.26	25113.5	33080.2	0.86:1.14	122856	Extended synaptotagmin-1 OS=Homo sapiens OX=9606 GN=ESYT1 PE=1 SV=1
1063	TRUE	Q00535|CDK5_HUMAN	0.55	11.99	3	3	Oxidation (M)	866.899	985.293	290.024	635.955	639.911	497.372	858.67	475.557	1.32:1.50:0.44:0.97:0.98:0.76:1.31:0.72	829.025	728.426	1.06:0.94	33304	Cyclin-dependent-like kinase 5 OS=Homo sapiens OX=9606 GN=CDK5 PE=1 SV=3
341	TRUE	Q99623|PHB2_HUMAN	5.68	44.48	12	12	Oxidation (M)	58905.6	60652.4	11869.1	11716.1	19395.8	10654.6	12693.1	17609	2.32:2.38:0.47:0.46:0.76:0.42:0.50:0.69	35974	15088.1	1.41:0.59	33296	Prohibitin-2 OS=Homo sapiens OX=9606 GN=PHB2 PE=1 SV=2
508	TRUE	P17706|PTN2_HUMAN	5.23	22.65	7	7	Oxidation (M)	2297.42	1298.79	302.866	231.579	1778.35	862.574	1061.3	1849.96	1.90:1.07:0.25:0.19:1.47:0.71:0.88:1.53	1148.79	1445.12	0.89:1.11	48473	Tyrosine-protein phosphatase non-receptor type 2 OS=Homo sapiens OX=9606 GN=PTPN2 PE=1 SV=2
320	TRUE	P04899|GNAI2_HUMAN	0.59	25.63	11	7	Carbamidomethylation; Oxidation (M)	10829	11271.5	4157.93	2439.28	6409.16	4131.77	7466.44	8213.27	1.58:1.64:0.61:0.36:0.93:0.60:1.09:1.20	7174.42	6555.16	1.05:0.95	40451	Guanine nucleotide-binding protein G(i) subunit alpha-2 OS=Homo sapiens OX=9606 GN=GNAI2 PE=1 SV=3
127	TRUE	Q5T9A4|ATD3B_HUMAN	3.57	37.5	22	22	Carbamidomethylation; Oxidation (M)	59808.7	59113	14803.5	14812	26029.1	15098.6	20832.1	23668.7	2.04:2.02:0.51:0.51:0.89:0.52:0.71:0.81	37134.3	21407.1	1.27:0.73	72573	ATPase family AAA domain-containing protein 3B OS=Homo sapiens OX=9606 GN=ATAD3B PE=1 SV=1
110	TRUE	P23396|RS3_HUMAN	0.71	62.14	24	24	Carbamidomethylation; Oxidation (M)	332481	324702	182322	184218	264474	204347	289925	268169	1.30:1.27:0.71:0.72:1.03:0.80:1.13:1.05	255931	256729	1.00:1.00	26688	40S ribosomal protein S3 OS=Homo sapiens OX=9606 GN=RPS3 PE=1 SV=2
606	TRUE	Q9BTW9|TBCD_HUMAN	0.51	5.45	5	5	Oxidation (M)	2191.5	1968.37	179.841	243.177	809.361	300.823	649.534	792.361	2.46:2.21:0.20:0.27:0.91:0.34:0.73:0.89	1538.89	755.026	1.34:0.66	132600	Tubulin-specific chaperone D OS=Homo sapiens OX=9606 GN=TBCD PE=1 SV=2
177	TRUE	Q460N5|PAR14_HUMAN	33.19	11.38	14	14	Oxidation (M)	675.413	758.85	538.233	539.403	4012.98	1679.22	2922.66	4354.25	0.35:0.39:0.28:0.28:2.07:0.87:1.51:2.25	627.975	3242.28	0.32:1.68	202800	Protein mono-ADP-ribosyltransferase PARP14 OS=Homo sapiens OX=9606 GN=PARP14 PE=1 SV=3
158	TRUE	O14974|MYPT1_HUMAN	1.12	22.04	18	18	Carbamidomethylation; Oxidation (M)	24938.9	12042.4	2752.61	2450.87	19405.5	12770	4961.83	3772.57	2.40:1.16:0.27:0.24:1.87:1.23:0.48:0.36	10546.2	10227.5	1.02:0.98	115281	Protein phosphatase 1 regulatory subunit 12A OS=Homo sapiens OX=9606 GN=PPP1R12A PE=1 SV=1
593	TRUE	Q5T2T1|MPP7_HUMAN	7.22	19.1	8	8	Oxidation (M)	3954.2	4077.47	1320.65	1435.23	3832.79	2872.29	4197.7	4522.13	1.21:1.24:0.40:0.44:1.17:0.88:1.28:1.38	2696.89	3856.23	0.82:1.18	65524	MAGUK p55 subfamily member 7 OS=Homo sapiens OX=9606 GN=MPP7 PE=1 SV=1
748	TRUE	Q8IWK6|AGRA3_HUMAN	1.1	3.94	4	4		12282	8781.77	715.015	771.841	4262.75	1255.73	1414.92	2968.99	3.03:2.16:0.18:0.19:1.05:0.31:0.35:0.73	5724.85	2475.6	1.40:0.60	146151	Adhesion G protein-coupled receptor A3 OS=Homo sapiens OX=9606 GN=ADGRA3 PE=1 SV=2
756	TRUE	Q9H0H5|RGAP1_HUMAN	3.78	13.45	5	5	Oxidation (M)	4423.77	5771.33	552.761	558.827	3765.01	1073.3	4299.12	5954.98	1.34:1.75:0.17:0.17:1.14:0.33:1.30:1.80	3939.51	3844.62	1.01:0.99	71027	Rac GTPase-activating protein 1 OS=Homo sapiens OX=9606 GN=RACGAP1 PE=1 SV=1
76	TRUE	P14625|ENPL_HUMAN	1.02	39.1	28	27	Carbamidomethylation; Oxidation (M)	90959.1	72355.9	28437.8	32032	62670.3	36600.1	50408.4	74623.6	1.62:1.29:0.51:0.57:1.12:0.65:0.90:1.33	57406.8	56594.2	1.01:0.99	92469	Endoplasmin OS=Homo sapiens OX=9606 GN=HSP90B1 PE=1 SV=1
416	TRUE	Q16181|SEPT7_HUMAN	4.71	26.09	8	8	Carbamidomethylation; Oxidation (M)	11962	10913.1	1475.91	1224.91	11188	4340.66	7338.98	10135.2	1.63:1.49:0.20:0.17:1.53:0.59:1.00:1.38	6393.97	8250.71	0.87:1.13	50680	Septin-7 OS=Homo sapiens OX=9606 GN=SEPTIN7 PE=1 SV=2
282	TRUE	P63092|GNAS2_HUMAN	4.81	33.5	10	10	Oxidation (M)	10439.6	11045.6	1853.47	1848.82	9113.29	6679.76	6817.61	8376.32	1.49:1.57:0.26:0.26:1.30:0.95:0.97:1.19	6296.86	7746.74	0.90:1.10	45665	Guanine nucleotide-binding protein G(s) subunit alpha isoforms short OS=Homo sapiens OX=9606 GN=GNAS PE=1 SV=1
14	TRUE	P07814|SYEP_HUMAN	0.3	58.8	75	75	Acetylation (N-term); Carbamidomethylation; Oxidation (M)	1.6812e+06	1728731	1.5337e+06	1.60028e+06	1.36623e+06	1361683	1.72603e+06	2325027	1.01:1.04:0.92:0.96:0.82:0.82:1.04:1.40	1.63598e+06	1.69474e+06	0.98:1.02	170591	Bifunctional glutamate/proline--tRNA ligase OS=Homo sapiens OX=9606 GN=EPRS1 PE=1 SV=5
925	TRUE	Q00587|BORG5_HUMAN	3.12	13.3	3	3	Oxidation (M)	8280.62	3782.54	332.65	326.568	1107.19	314.507	838.533	870.102	4.18:1.91:0.17:0.16:0.56:0.16:0.42:0.44	3777.13	888.972	1.62:0.38	40295	Cdc42 effector protein 1 OS=Homo sapiens OX=9606 GN=CDC42EP1 PE=1 SV=1
506	TRUE	Q13131|AAPK1_HUMAN	3.79	15.92	8	8	Oxidation (M)	8937.11	8797.07	2096.72	1568.47	9092.15	4250.72	6062.59	6009.42	1.53:1.50:0.36:0.27:1.55:0.73:1.04:1.03	5349.84	6353.72	0.91:1.09	64009	5'-AMP-activated protein kinase catalytic subunit alpha-1 OS=Homo sapiens OX=9606 GN=PRKAA1 PE=1 SV=4
397	TRUE	O95297|MPZL1_HUMAN	3.17	33.09	11	11	Carbamidomethylation	42539.3	66784.3	16455.4	16844.6	45836.1	25223	43462.5	48991.2	1.11:1.75:0.43:0.44:1.20:0.66:1.14:1.28	35695.7	40908	0.93:1.07	29082	Myelin protein zero-like protein 1 OS=Homo sapiens OX=9606 GN=MPZL1 PE=1 SV=1
6	TRUE	P58107|EPIPL_HUMAN	8.65	23.9	110	87	Carbamidomethylation; Oxidation (M)	81201.1	89666.2	20158.9	20302.8	86487.1	63112.9	96684.9	110943	1.14:1.26:0.28:0.29:1.22:0.89:1.36:1.56	52832.2	89306.9	0.74:1.26	555658	Epiplakin OS=Homo sapiens OX=9606 GN=EPPK1 PE=1 SV=3
150	TRUE	Q9UDY2|ZO2_HUMAN	4.43	23.45	22	22	Oxidation (M)	5941.04	104148	40791.4	42586.1	58258.3	41133.4	75158.9	68757.7	0.11:1.91:0.75:0.78:1.07:0.75:1.38:1.26	48366.7	60827.1	0.89:1.11	133958	Tight junction protein ZO-2 OS=Homo sapiens OX=9606 GN=TJP2 PE=1 SV=2
690	TRUE	O75083|WDR1_HUMAN	8.81	17.66	5	5		5100.3	4070.77	1786.43	1739.38	3078.91	1356.08	603.965	1236.27	2.15:1.72:0.75:0.73:1.30:0.57:0.25:0.52	3174.22	1568.81	1.34:0.66	66194	WD repeat-containing protein 1 OS=Homo sapiens OX=9606 GN=WDR1 PE=1 SV=4
284	TRUE	Q8TD16|BICD2_HUMAN	0.76	15.05	10	10	Oxidation (M)	5560.14	5020.42	407.403	2477.66	3023.47	1232.66	2122.76	2088.18	2.03:1.83:0.15:0.90:1.10:0.45:0.77:0.76	3366.41	2116.77	1.23:0.77	93533	Protein bicaudal D homolog 2 OS=Homo sapiens OX=9606 GN=BICD2 PE=1 SV=1
97	TRUE	P00533|EGFR_HUMAN	0.43	26.36	28	26	Carbamidomethylation; Oxidation (M)	78287.8	101694	28751.5	33287.7	51735	49912	47589.2	72888.2	1.35:1.75:0.50:0.57:0.89:0.86:0.82:1.26	60505.3	55531.1	1.04:0.96	134277	Epidermal growth factor receptor OS=Homo sapiens OX=9606 GN=EGFR PE=1 SV=2
685	TRUE	Q8N6H7|ARFG2_HUMAN	8.25	13.82	6	6	Oxidation (M)	1158.63	1241.46	612.853	612.987	4300.46	1852.35	732.949	1428.55	0.78:0.83:0.41:0.41:2.88:1.24:0.49:0.96	906.482	2078.58	0.61:1.39	56720	ADP-ribosylation factor GTPase-activating protein 2 OS=Homo sapiens OX=9606 GN=ARFGAP2 PE=1 SV=1
2	TRUE	Q09666|AHNK_HUMAN	3.48	42.26	198	198	Acetylation (N-term); Carbamidomethylation; Oxidation (M)	240973	244191	509433	534523	444307	245162	563963	746312	0.55:0.55:1.15:1.21:1.01:0.56:1.28:1.69	382280	499936	0.87:1.13	629101	Neuroblast differentiation-associated protein AHNAK OS=Homo sapiens OX=9606 GN=AHNAK PE=1 SV=2
319	TRUE	Q8IWA5|CTL2_HUMAN	8.82	19.26	13	13	Acetylation (N-term); Carbamidomethylation	16957.5	17577.3	4708.69	4640.84	24452.4	19678.1	13938.5	15607.5	1.15:1.20:0.32:0.32:1.66:1.34:0.95:1.06	10971.1	18419.1	0.75:1.25	80124	Choline transporter-like protein 2 OS=Homo sapiens OX=9606 GN=SLC44A2 PE=1 SV=3
1049	TRUE	Q9UQ49|NEUR3_HUMAN	2.63	12.62	3	3		1505.83	1310.63	107.897	109.357	883.913	328.538	753.544	769.881	2.09:1.82:0.15:0.15:1.23:0.46:1.04:1.07	1107.44	712.626	1.22:0.78	48252	Sialidase-3 OS=Homo sapiens OX=9606 GN=NEU3 PE=1 SV=1
561	TRUE	P52799|EFNB2_HUMAN	4.15	13.81	4	3		5301.18	4746.64	700.427	860.342	3068.97	2206.04	3950.79	4720.97	1.66:1.49:0.22:0.27:0.96:0.69:1.24:1.48	2902.15	3486.69	0.91:1.09	36923	Ephrin-B2 OS=Homo sapiens OX=9606 GN=EFNB2 PE=1 SV=1
402	TRUE	Q8TF72|SHRM3_HUMAN	6.33	3.96	6	6		1755.29	1219.59	725.698	18415.6	1738.89	444.776	918.194	674.395	0.54:0.38:0.22:5.69:0.54:0.14:0.28:0.21	5529.03	986.058	1.70:0.30	216857	Protein Shroom3 OS=Homo sapiens OX=9606 GN=SHROOM3 PE=1 SV=2
653	TRUE	Q9H0B6|KLC2_HUMAN	0.26	6.75	3	3		1303.92	1331.93	391.462	400.603	758.703	629.61	689.669	743.213	1.67:1.71:0.50:0.51:0.97:0.81:0.88:0.95	856.978	705.299	1.10:0.90	68935	Kinesin light chain 2 OS=Homo sapiens OX=9606 GN=KLC2 PE=1 SV=1
196	TRUE	Q9UM54|MYO6_HUMAN	2.18	16.92	16	16	Oxidation (M)	4116.64	4172.11	499.773	718.835	1882.48	927.82	566.31	1591.14	2.28:2.31:0.28:0.40:1.04:0.51:0.31:0.88	2376.84	1241.94	1.31:0.69	149691	Unconventional myosin-VI OS=Homo sapiens OX=9606 GN=MYO6 PE=1 SV=4
261	TRUE	P53985|MOT1_HUMAN	1.17	14.4	11	11	Oxidation (M)	95832.9	90591.7	46651.6	46795.4	102832	57643.5	58228.1	74405.6	1.34:1.26:0.65:0.65:1.44:0.80:0.81:1.04	69967.9	73277.2	0.98:1.02	53944	Monocarboxylate transporter 1 OS=Homo sapiens OX=9606 GN=SLC16A1 PE=1 SV=3
62	TRUE	Q9UIW2|PLXA1_HUMAN	4.4	21.47	36	25	Carbamidomethylation; Oxidation (M)	19528.1	18472.7	6653.75	7190.05	8909.48	7547.18	9138.64	8787.85	1.81:1.71:0.62:0.67:0.83:0.70:0.85:0.82	12961.2	8595.79	1.20:0.80	211067	Plexin-A1 OS=Homo sapiens OX=9606 GN=PLXNA1 PE=1 SV=3
771	TRUE	O95786|DDX58_HUMAN	24.74	6.05	4	4		364.8	516.587	154.499	167.438	1127.03	1045.03	950.372	1468.44	0.50:0.71:0.21:0.23:1.56:1.44:1.31:2.03	417.976	1203	0.52:1.48	106600	Antiviral innate immune response receptor RIG-I OS=Homo sapiens OX=9606 GN=DDX58 PE=1 SV=2
815	TRUE	Q92854|SEM4D_HUMAN	19.49	5.1	3	3		1733.98	815.004	821.751	963.667	4927.42	1492.5	3840.7	4370.78	0.73:0.34:0.35:0.41:2.08:0.63:1.62:1.84	1083.6	3657.85	0.46:1.54	96150	Semaphorin-4D OS=Homo sapiens OX=9606 GN=SEMA4D PE=1 SV=1
219	TRUE	Q9Y6M7|S4A7_HUMAN	3.11	15.32	13	13	Oxidation (M)	11740.7	15257.3	699.561	657.759	2115.36	993.778	1987.56	1470.32	2.69:3.50:0.16:0.15:0.48:0.23:0.46:0.34	7593.42	1641.75	1.64:0.36	136044	Sodium bicarbonate cotransporter 3 OS=Homo sapiens OX=9606 GN=SLC4A7 PE=1 SV=2
758	TRUE	Q96RD7|PANX1_HUMAN	1.64	13.62	4	4	Oxidation (M)	9056.76	8595.9	867.349	1082.07	4622.81	2638.36	3828.12	4750.24	2.04:1.94:0.20:0.24:1.04:0.60:0.86:1.07	5270.2	3997.54	1.14:0.86	48050	Pannexin-1 OS=Homo sapiens OX=9606 GN=PANX1 PE=1 SV=4
268	TRUE	Q9P0V3|SH3B4_HUMAN	2.56	22.95	16	16	Carbamidomethylation; Oxidation (M)	5871.68	5287.12	5761.41	1335.61	5277.81	3682.01	5093.6	6187.68	1.22:1.10:1.20:0.28:1.10:0.77:1.06:1.29	4563.96	5060.28	0.95:1.05	107496	SH3 domain-binding protein 4 OS=Homo sapiens OX=9606 GN=SH3BP4 PE=1 SV=1
117	TRUE	Q8WUM4|PDC6I_HUMAN	11.01	34.22	25	25	Acetylation (N-term); Carbamidomethylation; Oxidation (M)	18429.4	14418.7	9688.64	8571.63	8291.67	8620	7610.9	8868.74	1.74:1.37:0.92:0.81:0.79:0.82:0.72:0.84	12777.1	8347.83	1.21:0.79	96023	Programmed cell death 6-interacting protein OS=Homo sapiens OX=9606 GN=PDCD6IP PE=1 SV=1
423	TRUE	Q92597|NDRG1_HUMAN	11.3	26.4	7	7	Oxidation (M)	8411.42	8382.47	3431.16	2451.23	19509.3	12324.6	6992.85	9548.57	0.95:0.94:0.39:0.28:2.20:1.39:0.79:1.08	5669.07	12093.8	0.64:1.36	42835	Protein NDRG1 OS=Homo sapiens OX=9606 GN=NDRG1 PE=1 SV=1
546	TRUE	Q9NQC3|RTN4_HUMAN	0.67	6.71	7	7	Carbamidomethylation	15117	14512.1	1000.06	1607.36	7123.23	2155.09	5499.63	7456.93	2.22:2.13:0.15:0.24:1.05:0.32:0.81:1.10	8359.08	5558.72	1.20:0.80	129931	Reticulon-4 OS=Homo sapiens OX=9606 GN=RTN4 PE=1 SV=2
258	TRUE	P38606|VATA_HUMAN	1.55	26.58	12	12	Oxidation (M)	14230.9	12635.1	1522.02	1620.51	7043.97	3854.34	5125.4	9084.14	2.07:1.83:0.22:0.24:1.02:0.56:0.74:1.32	7502.12	6276.96	1.09:0.91	68304	V-type proton ATPase catalytic subunit A OS=Homo sapiens OX=9606 GN=ATP6V1A PE=1 SV=2
574	TRUE	Q8IWU5|SULF2_HUMAN	17.26	8.97	6	6	Oxidation (M)	1125.7	1348.16	858.545	867.053	7279.43	2430.34	1636.9	2799.82	0.49:0.59:0.37:0.38:3.17:1.06:0.71:1.22	1139.48	3672.35	0.47:1.53	100455	Extracellular sulfatase Sulf-2 OS=Homo sapiens OX=9606 GN=SULF2 PE=1 SV=1
1009	TRUE	Q6PFW1|VIP1_HUMAN	11.39	1.74	2	2		1208.51	1176.16	0	0	569.404	236.969	540.397	749.534	2.16:2.10:0.00:0.00:1.02:0.42:0.96:1.34	1192.33	558.889	1.36:0.64	159521	Inositol hexakisphosphate and diphosphoinositol-pentakisphosphate kinase 1 OS=Homo sapiens OX=9606 GN=PPIP5K1 PE=1 SV=1
267	TRUE	P09211|GSTP1_HUMAN	3.37	54.76	11	11	Carbamidomethylation; Oxidation (M)	62244.5	61514.6	2470.2	4870	33718.8	29568.9	21798.4	30902.4	2.02:1.99:0.08:0.16:1.09:0.96:0.71:1.00	32774.8	28997.1	1.06:0.94	23356	Glutathione S-transferase P OS=Homo sapiens OX=9606 GN=GSTP1 PE=1 SV=2
3	TRUE	P15924|DESP_HUMAN	10.63	42.63	109	109	Carbamidomethylation; Oxidation (M)	55145.8	52705.7	12045.6	13734.4	70682	43173.6	68599.3	82983.7	1.11:1.06:0.24:0.28:1.42:0.87:1.38:1.66	33407.9	66359.7	0.67:1.33	331774	Desmoplakin OS=Homo sapiens OX=9606 GN=DSP PE=1 SV=3
1156	TRUE	O60906|NSMA_HUMAN	2.51	6.38	2	2		2280.34	2608.25	117.981	113.791	494.139	144.145	218.628	514.262	2.81:3.21:0.15:0.14:0.61:0.18:0.27:0.63	1665.75	440.211	1.58:0.42	47646	Sphingomyelin phosphodiesterase 2 OS=Homo sapiens OX=9606 GN=SMPD2 PE=1 SV=2
688	TRUE	Q6EMK4|VASN_HUMAN	7.02	10.25	5	5		4576.05	3927.99	844.846	1042.3	5826.06	2139.37	4082.46	5421.27	1.31:1.13:0.24:0.30:1.67:0.61:1.17:1.56	2597.8	4367.29	0.75:1.25	71713	Vasorin OS=Homo sapiens OX=9606 GN=VASN PE=1 SV=1
337	TRUE	P06396|GELS_HUMAN	2.89	17.77	9	9	Carbamidomethylation; Oxidation (M)	11798.6	13984.8	1631.5	1841.93	12145.2	5525.31	5374.39	7448.58	1.58:1.87:0.22:0.25:1.63:0.74:0.72:1.00	7314.2	7623.36	0.98:1.02	85698	Gelsolin OS=Homo sapiens OX=9606 GN=GSN PE=1 SV=1
1065	TRUE	Q96QU8|XPO6_HUMAN	1.16	2.04	2	2		1310.15	1507.96	162.252	222.263	1053.93	512.273	732.502	390.483	1.78:2.05:0.22:0.30:1.43:0.70:0.99:0.53	800.658	672.297	1.09:0.91	128883	Exportin-6 OS=Homo sapiens OX=9606 GN=XPO6 PE=1 SV=1
821	TRUE	Q9UKE5|TNIK_HUMAN	22.7	4.34	5	5		4429.29	3577.45	1413.13	1619.2	11041.1	6103.61	11328.1	11754.3	0.69:0.56:0.22:0.25:1.72:0.95:1.77:1.83	2759.77	10056.8	0.43:1.57	154943	TRAF2 and NCK-interacting protein kinase OS=Homo sapiens OX=9606 GN=TNIK PE=1 SV=1
236	TRUE	P04439|HLAA_HUMAN	29.71	20.27	13	7	Carbamidomethylation	35943.2	34782.5	20590.4	21664.3	84839.4	85820.8	67356.6	62189.8	0.70:0.67:0.40:0.42:1.64:1.66:1.30:1.20	28245.1	75051.6	0.55:1.45	40841	HLA class I histocompatibility antigen, A alpha chain OS=Homo sapiens OX=9606 GN=HLA-A PE=1 SV=2
860	TRUE	Q9NNW5|WDR6_HUMAN	0.23	6.16	4	4	Carbamidomethylation	2325.85	1753.76	66.1947	65.2672	366.977	153.378	361.717	656.183	3.24:2.44:0.09:0.09:0.51:0.21:0.50:0.91	1867.47	461.608	1.60:0.40	121725	WD repeat-containing protein 6 OS=Homo sapiens OX=9606 GN=WDR6 PE=1 SV=1
707	TRUE	O00161|SNP23_HUMAN	9.96	19.91	3	3	Oxidation (M)	1899.67	2271.89	776.878	882.172	2734.16	1940.05	2113.62	2294.15	1.02:1.22:0.42:0.47:1.47:1.04:1.13:1.23	1457.65	2270.5	0.78:1.22	23354	Synaptosomal-associated protein 23 OS=Homo sapiens OX=9606 GN=SNAP23 PE=1 SV=1
408	TRUE	Q15334|L2GL1_HUMAN	4.6	13.06	10	10	Carbamidomethylation; Oxidation (M)	4983.75	3801.27	448.44	698.228	5516.12	1221.99	3016.96	4927.08	1.62:1.24:0.15:0.23:1.79:0.40:0.98:1.60	2482.92	3670.54	0.81:1.19	115418	Lethal(2) giant larvae protein homolog 1 OS=Homo sapiens OX=9606 GN=LLGL1 PE=1 SV=3
938	TRUE	Q9BRK5|CAB45_HUMAN	5.95	10.77	3	3		1162.08	1358.02	1111.5	827.394	1164.82	1105.81	532.022	725.244	1.16:1.36:1.11:0.83:1.17:1.11:0.53:0.73	1348.62	909.971	1.19:0.81	41807	45 kDa calcium-binding protein OS=Homo sapiens OX=9606 GN=SDF4 PE=1 SV=1
635	TRUE	P13928|ANXA8_HUMAN	4.59	20.8	5	5	Oxidation (M)	1080.68	922.771	535.183	356.146	673.64	1025.02	1174.13	752.119	1.33:1.13:0.66:0.44:0.83:1.26:1.44:0.92	813.628	906.228	0.95:1.05	36881	Annexin A8 OS=Homo sapiens OX=9606 GN=ANXA8 PE=1 SV=3
1085	TRUE	P54105|ICLN_HUMAN	9.85	18.57	3	3	Oxidation (M)	10587.7	9955.48	2362.47	1629.89	1380.45	1933.42	833.768	2750.45	2.69:2.53:0.60:0.41:0.35:0.49:0.21:0.70	6233.84	1752.12	1.56:0.44	26215	Methylosome subunit pICln OS=Homo sapiens OX=9606 GN=CLNS1A PE=1 SV=1
1030	TRUE	Q01628|IFM3_HUMAN	22.59	30.83	2	2	Oxidation (M)	6161.24	9861.47	2239.03	2168.58	27958.9	18383.8	29202.6	17365.5	0.43:0.70:0.16:0.15:1.97:1.30:2.06:1.23	5169.55	23227.7	0.36:1.64	14632	Interferon-induced transmembrane protein 3 OS=Homo sapiens OX=9606 GN=IFITM3 PE=1 SV=2
501	TRUE	P52292|IMA1_HUMAN	2.48	24.95	8	8	Oxidation (M)	7011.02	7889.26	1007.1	1202.25	3862.67	1720.37	1062.49	2128.52	2.17:2.44:0.31:0.37:1.19:0.53:0.33:0.66	4753.44	2193.51	1.37:0.63	57862	Importin subunit alpha-1 OS=Homo sapiens OX=9606 GN=KPNA2 PE=1 SV=1
302	TRUE	Q01518|CAP1_HUMAN	0.54	22.32	8	8	Carbamidomethylation; Oxidation (M)	3931.72	2983.15	497.164	563.388	1878.39	919.95	1786.27	1502.44	2.24:1.70:0.28:0.32:1.07:0.52:1.02:0.85	1993.86	1521.76	1.13:0.87	51901	Adenylyl cyclase-associated protein 1 OS=Homo sapiens OX=9606 GN=CAP1 PE=1 SV=5
1097	TRUE	Q13322|GRB10_HUMAN	4.56	4.88	2	2	Oxidation (M)	503.843	733.277	206.957	193.658	168.29	216.393	284.243	329.55	1.53:2.23:0.63:0.59:0.51:0.66:0.86:1.00	520.604	282.161	1.30:0.70	67231	Growth factor receptor-bound protein 10 OS=Homo sapiens OX=9606 GN=GRB10 PE=1 SV=2
375	TRUE	P31939|PUR9_HUMAN	0.99	17.57	7	7	Oxidation (M)	4389.77	2805.75	651.872	1548.68	2058.29	1302.26	1690.81	1740.1	2.17:1.39:0.32:0.77:1.02:0.64:0.84:0.86	2349.02	1697.87	1.16:0.84	64616	Bifunctional purine biosynthesis protein ATIC OS=Homo sapiens OX=9606 GN=ATIC PE=1 SV=3
1249	TRUE	P84074|HPCA_HUMAN	4.55	10.88	2	2		441.866	467.706	188.877	306.072	522.399	412.704	389.475	353.489	1.15:1.21:0.49:0.79:1.36:1.07:1.01:0.92	351.13	419.516	0.91:1.09	22427	Neuron-specific calcium-binding protein hippocalcin OS=Homo sapiens OX=9606 GN=HPCA PE=1 SV=2
279	TRUE	P18433|PTPRA_HUMAN	2.41	23.69	13	13	Oxidation (M)	6437.95	9809.97	2376.82	1953.64	5953.14	3138.36	6101.79	7135.51	1.20:1.83:0.44:0.36:1.11:0.59:1.14:1.33	5144.59	5582.2	0.96:1.04	90719	Receptor-type tyrosine-protein phosphatase alpha OS=Homo sapiens OX=9606 GN=PTPRA PE=1 SV=3
133	TRUE	Q92974|ARHG2_HUMAN	8.15	31.24	22	22	Carbamidomethylation; Oxidation (M)	10562	9722.95	1828.81	1733.6	2105.14	2074.85	1340.51	1933.58	2.70:2.48:0.47:0.44:0.54:0.53:0.34:0.49	5961.84	1863.52	1.52:0.48	111543	Rho guanine nucleotide exchange factor 2 OS=Homo sapiens OX=9606 GN=ARHGEF2 PE=1 SV=4
247	TRUE	Q12907|LMAN2_HUMAN	0.96	43.26	11	11	Carbamidomethylation; Oxidation (M)	19206.3	18137	2015.12	2591.59	8627.03	3791.54	9928.12	11139.8	2.04:1.92:0.21:0.27:0.91:0.40:1.05:1.18	10487.5	8371.62	1.11:0.89	40229	Vesicular integral-membrane protein VIP36 OS=Homo sapiens OX=9606 GN=LMAN2 PE=1 SV=1
404	TRUE	Q8WVM8|SCFD1_HUMAN	0	21.81	9	9	Oxidation (M)	3812.28	2007.06	1074.85	1053.28	2558.95	662.714	1711.67	2985.05	1.92:1.01:0.54:0.53:1.29:0.33:0.86:1.51	2225.36	1979.6	1.06:0.94	72380	Sec1 family domain-containing protein 1 OS=Homo sapiens OX=9606 GN=SCFD1 PE=1 SV=4
521	TRUE	Q9NYQ6|CELR1_HUMAN	11.24	3.42	8	7	Oxidation (M)	2907.7	2896.24	1071.04	1957.9	2908.57	4507.91	3004.35	4246.29	0.99:0.99:0.36:0.67:0.99:1.53:1.02:1.45	2208.22	3666.78	0.75:1.25	329486	Cadherin EGF LAG seven-pass G-type receptor 1 OS=Homo sapiens OX=9606 GN=CELSR1 PE=1 SV=1
181	TRUE	Q08345|DDR1_HUMAN	8.77	23.55	16	16	Carbamidomethylation; Oxidation (M)	12596.6	15121.6	7642.31	8181.14	28956.5	9454.84	14253.6	28173.4	0.81:0.97:0.49:0.53:1.86:0.61:0.92:1.81	10885.4	20209.6	0.70:1.30	101128	Epithelial discoidin domain-containing receptor 1 OS=Homo sapiens OX=9606 GN=DDR1 PE=1 SV=1
201	TRUE	P30530|UFO_HUMAN	2.7	17.11	13	12	Oxidation (M)	4601.29	4327.12	1322.35	1463.06	1574.36	2296.6	1921.18	2230.41	1.87:1.75:0.54:0.59:0.64:0.93:0.78:0.90	2928.45	2005.64	1.19:0.81	98337	Tyrosine-protein kinase receptor UFO OS=Homo sapiens OX=9606 GN=AXL PE=1 SV=4
787	TRUE	Q8IWB1|IPRI_HUMAN	4.1	6.22	3	3	Oxidation (M)	1450.1	1283.98	508.734	529.372	971.579	773.827	1265.96	1839.76	1.35:1.19:0.47:0.49:0.90:0.72:1.17:1.71	943.046	1212.78	0.87:1.13	62060	Inositol 1,4,5-trisphosphate receptor-interacting protein OS=Homo sapiens OX=9606 GN=ITPRIP PE=1 SV=1
419	TRUE	Q15084|PDIA6_HUMAN	11.38	33.41	10	10		21074.7	19937	6917.58	8885.22	24911.1	21156.3	23520.6	24750.4	1.12:1.06:0.37:0.47:1.32:1.12:1.24:1.31	14203.6	23584.6	0.75:1.25	48121	Protein disulfide-isomerase A6 OS=Homo sapiens OX=9606 GN=PDIA6 PE=1 SV=1
618	TRUE	O75976|CBPD_HUMAN	24.62	3.91	5	5		467.987	436.092	920.088	1110.67	2323.68	1656.73	2657.92	2759.83	0.30:0.28:0.60:0.72:1.51:1.07:1.72:1.79	733.709	2349.54	0.48:1.52	152931	Carboxypeptidase D OS=Homo sapiens OX=9606 GN=CPD PE=1 SV=2
620	TRUE	Q93050|VPP1_HUMAN	5.61	9.68	5	5	Oxidation (M)	1310.23	1359.81	333.58	291.54	1364.43	606.117	1214.86	1699.83	1.28:1.33:0.33:0.29:1.33:0.59:1.19:1.66	888.267	1259	0.83:1.17	96413	V-type proton ATPase 116 kDa subunit a1 OS=Homo sapiens OX=9606 GN=ATP6V0A1 PE=1 SV=3
66	TRUE	P35580|MYH10_HUMAN	0.35	16.24	33	23	Carbamidomethylation; Oxidation (M)	6351.28	7189.62	1128.02	1007.19	3369.4	1732.72	2952.65	2399.75	1.94:2.20:0.35:0.31:1.03:0.53:0.90:0.73	3919.03	2613.63	1.20:0.80	228999	Myosin-10 OS=Homo sapiens OX=9606 GN=MYH10 PE=1 SV=3
115	TRUE	Q8IZJ1|UNC5B_HUMAN	26.39	36.93	28	28	Carbamidomethylation; Oxidation (M)	13119.6	12219.2	3427.75	3986.19	63226.3	30095.5	62342.7	70597	0.41:0.38:0.11:0.12:1.95:0.93:1.93:2.18	8188.2	56565.4	0.25:1.75	103638	Netrin receptor UNC5B OS=Homo sapiens OX=9606 GN=UNC5B PE=1 SV=2
795	TRUE	P07948|LYN_HUMAN	3.29	11.13	5	5	Oxidation (M)	5914.97	6213.62	779.316	982.473	1631.53	538.479	1759.2	2433.99	2.34:2.45:0.31:0.39:0.64:0.21:0.69:0.96	3472.59	1590.8	1.37:0.63	58574	Tyrosine-protein kinase Lyn OS=Homo sapiens OX=9606 GN=LYN PE=1 SV=3
162	TRUE	Q14126|DSG2_HUMAN	2.65	30.41	23	23	Carbamidomethylation; Oxidation (M)	16085.5	18108.1	2113.15	4995.21	10869.3	6160.39	17273.1	11031.6	1.49:1.67:0.20:0.46:1.00:0.57:1.59:1.02	10325.5	11333.6	0.95:1.05	122294	Desmoglein-2 OS=Homo sapiens OX=9606 GN=DSG2 PE=1 SV=2
760	TRUE	Q8WU76|SCFD2_HUMAN	5.18	10.82	6	6		4225.77	4015.14	641.589	389.087	899.928	400.945	601.503	1029.75	2.77:2.63:0.42:0.26:0.59:0.26:0.39:0.68	2499.65	785.74	1.52:0.48	75127	Sec1 family domain-containing protein 2 OS=Homo sapiens OX=9606 GN=SCFD2 PE=1 SV=2
578	TRUE	Q9Y666|S12A7_HUMAN	1.83	4.99	5	4	Oxidation (M)	5039.04	5114.42	1269.3	1066.87	1513.35	2294.86	2193.66	2019.51	1.97:1.99:0.50:0.42:0.59:0.90:0.86:0.79	3122.41	2005.35	1.22:0.78	119106	Solute carrier family 12 member 7 OS=Homo sapiens OX=9606 GN=SLC12A7 PE=1 SV=3
173	TRUE	O75146|HIP1R_HUMAN	1.31	22.57	19	18	Oxidation (M)	5165.44	6351.53	2067.66	2110.06	4300.84	2546.99	3382.48	2469.61	1.46:1.79:0.58:0.59:1.21:0.72:0.95:0.70	3923.67	3174.98	1.11:0.89	119388	Huntingtin-interacting protein 1-related protein OS=Homo sapiens OX=9606 GN=HIP1R PE=1 SV=2
100	TRUE	Q13835|PKP1_HUMAN	30.32	41.9	26	26	Carbamidomethylation; Oxidation (M)	16633.8	17620.2	4408.18	7497	86928.9	63334	100567	77560	0.36:0.38:0.09:0.16:1.86:1.35:2.15:1.66	11539.8	82097.4	0.25:1.75	82861	Plakophilin-1 OS=Homo sapiens OX=9606 GN=PKP1 PE=1 SV=2
827	TRUE	P61586|RHOA_HUMAN	0.02	11.4	3	2	Carbamidomethylation; Oxidation (M)	5872.73	5334.57	1595.44	1095.04	9176.91	5369.28	950.444	1152.87	1.54:1.40:0.42:0.29:2.40:1.41:0.25:0.30	3677.62	4280.01	0.92:1.08	21768	Transforming protein RhoA OS=Homo sapiens OX=9606 GN=RHOA PE=1 SV=1
619	TRUE	Q5T5U3|RHG21_HUMAN	20.61	1.53	3	3		933.19	693.732	997.532	471.387	441.185	140.339	212.75	260.726	1.80:1.34:1.92:0.91:0.85:0.27:0.41:0.50	936.613	379.257	1.42:0.58	217462	Rho GTPase-activating protein 21 OS=Homo sapiens OX=9606 GN=ARHGAP21 PE=1 SV=2
752	TRUE	P15151|PVR_HUMAN	6.44	13.67	4	4	Oxidation (M)	53407.9	43833.3	23254.5	21401	25668.6	14691	27334	26246.3	1.81:1.49:0.79:0.73:0.87:0.50:0.93:0.89	35474.2	23485	1.20:0.80	45303	Poliovirus receptor OS=Homo sapiens OX=9606 GN=PVR PE=1 SV=2
137	TRUE	Q02413|DSG1_HUMAN	14.03	6.48	4	4	Oxidation (M)	1295.39	791.4	608.49	1017.66	1275.71	1216.52	2657.97	2314.62	0.93:0.57:0.44:0.73:0.91:0.87:1.90:1.66	928.237	1866.2	0.66:1.34	113748	Desmoglein-1 OS=Homo sapiens OX=9606 GN=DSG1 PE=1 SV=2
95	TRUE	P04406|G3P_HUMAN	2.77	50.75	17	17	Carbamidomethylation; Oxidation (M)	102783	92433.1	21217.3	18709.8	67620.7	48333.3	60255.8	66538.6	1.72:1.55:0.36:0.31:1.13:0.81:1.01:1.11	58785.8	60687.1	0.98:1.02	36053	Glyceraldehyde-3-phosphate dehydrogenase OS=Homo sapiens OX=9606 GN=GAPDH PE=1 SV=3
1072	TRUE	Q9Y508|RN114_HUMAN	22.8	9.65	2	2	Carbamidomethylation	1015.18	966.294	0	0	388.528	282.879	234.824	181.293	2.65:2.52:0.00:0.00:1.01:0.74:0.61:0.47	990.736	271.881	1.57:0.43	25694	E3 ubiquitin-protein ligase RNF114 OS=Homo sapiens OX=9606 GN=RNF114 PE=1 SV=1
206	TRUE	P12235|ADT1_HUMAN	14.77	22.82	18	8	Acetylation (N-term); Carbamidomethylation; Oxidation (M)	28168.7	27560.3	23998.5	24725.4	34376.8	27162.5	46228	43877.2	0.88:0.86:0.75:0.77:1.07:0.85:1.44:1.37	26113.2	37911.1	0.82:1.18	33064	ADP/ATP translocase 1 OS=Homo sapiens OX=9606 GN=SLC25A4 PE=1 SV=4
68	TRUE	P08581|MET_HUMAN	7.28	30.65	34	34	Carbamidomethylation; Oxidation (M)	52522.9	52026.2	24357.3	24468.3	59909.1	45931.1	48856.1	47087.3	1.18:1.17:0.55:0.55:1.35:1.03:1.10:1.06	38343.7	50445.9	0.86:1.14	155541	Hepatocyte growth factor receptor OS=Homo sapiens OX=9606 GN=MET PE=1 SV=4
455	TRUE	Q14156|EFR3A_HUMAN	0.68	10.72	6	6	Oxidation (M)	3285.43	4256.64	963.787	967.298	2269.39	1333.91	2112.51	2823.1	1.46:1.89:0.43:0.43:1.01:0.59:0.94:1.25	2368.29	2134.73	1.05:0.95	92924	Protein EFR3 homolog A OS=Homo sapiens OX=9606 GN=EFR3A PE=1 SV=2
837	TRUE	P36404|ARL2_HUMAN	3.48	36.41	5	5	Oxidation (M)	3430.78	3040.21	966.729	933.625	1795.01	2025.79	2109.14	4776.87	1.44:1.27:0.41:0.39:0.75:0.85:0.88:2.00	2092.84	2676.71	0.88:1.12	20878	ADP-ribosylation factor-like protein 2 OS=Homo sapiens OX=9606 GN=ARL2 PE=1 SV=4
1171	TRUE	Q9UKG1|DP13A_HUMAN	6.54	4.65	2	2		295.919	382.682	208.531	152.231	111.652	246.683	181.452	174.821	1.35:1.75:0.95:0.69:0.51:1.13:0.83:0.80	259.841	243.161	1.03:0.97	79663	DCC-interacting protein 13-alpha OS=Homo sapiens OX=9606 GN=APPL1 PE=1 SV=1
926	TRUE	P21860|ERBB3_HUMAN	9.12	2.98	3	3		811.151	870.103	204.856	258.457	886.034	635.568	1110.96	1038.57	1.12:1.20:0.28:0.36:1.22:0.87:1.53:1.43	739.516	917.782	0.89:1.11	148098	Receptor tyrosine-protein kinase erbB-3 OS=Homo sapiens OX=9606 GN=ERBB3 PE=1 SV=1
316	TRUE	Q16555|DPYL2_HUMAN	15.27	34.27	11	11	Oxidation (M)	4009.46	3779.91	7794.81	13589.9	2982.01	1012.11	2568.05	2479.2	0.84:0.79:1.63:2.84:0.62:0.21:0.54:0.52	7859.09	2260.34	1.55:0.45	62294	Dihydropyrimidinase-related protein 2 OS=Homo sapiens OX=9606 GN=DPYSL2 PE=1 SV=1
712	TRUE	P13929|ENOB_HUMAN	12.6	6.22	4	2	Oxidation (M)	468.185	503.118	153.318	453.499	755.175	459.558	2223.74	2508.42	0.50:0.53:0.16:0.48:0.80:0.49:2.36:2.67	434.587	1486.72	0.45:1.55	46987	Beta-enolase OS=Homo sapiens OX=9606 GN=ENO3 PE=1 SV=5
519	TRUE	P36507|MP2K2_HUMAN	2.05	23.75	8	7	Oxidation (M)	10555.9	10217.8	2375.21	2564	7469.3	3522.57	7161.04	9114.49	1.59:1.54:0.36:0.39:1.13:0.53:1.08:1.38	6428.24	6816.85	0.97:1.03	44424	Dual specificity mitogen-activated protein kinase kinase 2 OS=Homo sapiens OX=9606 GN=MAP2K2 PE=1 SV=1
611	TRUE	P21964|COMT_HUMAN	4.83	23.62	4	4	Carbamidomethylation; Oxidation (M)	17187.1	17143.9	3287.52	3067.45	3887.58	2289.99	5276.32	6453.42	2.35:2.34:0.45:0.42:0.53:0.31:0.72:0.88	10171.5	4476.83	1.39:0.61	30037	Catechol O-methyltransferase OS=Homo sapiens OX=9606 GN=COMT PE=1 SV=2
718	TRUE	Q8IZP0|ABI1_HUMAN	18.74	16.34	6	6	Carbamidomethylation; Oxidation (M)	2560.66	2444.64	728.448	582.781	6188.13	10039.5	4611.28	4093.26	0.66:0.63:0.19:0.15:1.58:2.57:1.18:1.05	1629.52	6233.04	0.41:1.59	55081	Abl interactor 1 OS=Homo sapiens OX=9606 GN=ABI1 PE=1 SV=4
23	TRUE	P05787|K2C8_HUMAN	0.27	61.28	49	37	Oxidation (M)	218777	222887	30199.7	35791.8	91576.1	57522.7	98048.8	122114	2.00:2.03:0.28:0.33:0.84:0.52:0.89:1.11	126914	92315.4	1.16:0.84	53704	Keratin, type II cytoskeletal 8 OS=Homo sapiens OX=9606 GN=KRT8 PE=1 SV=7
199	TRUE	Q9H4M9|EHD1_HUMAN	3.56	30.52	18	12	Oxidation (M)	7330.63	7469.05	978.101	2546.41	5116.93	3779.42	5654.16	6522.84	1.49:1.52:0.20:0.52:1.04:0.77:1.15:1.32	4581.05	5268.34	0.93:1.07	60627	EH domain-containing protein 1 OS=Homo sapiens OX=9606 GN=EHD1 PE=1 SV=2
1197	TRUE	Q99720|SGMR1_HUMAN	0.35	13.9	2	2		3160.95	3388.77	571.953	559.014	1463.85	553.464	1589.68	2097.87	1.89:2.03:0.34:0.33:0.87:0.33:0.95:1.25	2158.8	1460.88	1.19:0.81	25128	Sigma non-opioid intracellular receptor 1 OS=Homo sapiens OX=9606 GN=SIGMAR1 PE=1 SV=1
22	TRUE	Q9NYQ8|FAT2_HUMAN	23.1	24.37	75	75	Oxidation (M)	4120.19	6137.66	6012.66	1421.24	21900.9	12211.8	28376	32524.6	0.29:0.44:0.43:0.10:1.55:0.87:2.01:2.31	4500.05	23900.7	0.32:1.68	479317	Protocadherin Fat 2 OS=Homo sapiens OX=9606 GN=FAT2 PE=1 SV=2
183	TRUE	Q9H4L5|OSBL3_HUMAN	4.17	27.62	18	18	Carbamidomethylation; Oxidation (M)	12389.2	7995	2027.82	2237.69	3397.26	3350.17	2130.5	3184.81	2.70:1.74:0.44:0.49:0.74:0.73:0.46:0.69	6162.44	3015.69	1.34:0.66	101224	Oxysterol-binding protein-related protein 3 OS=Homo sapiens OX=9606 GN=OSBPL3 PE=1 SV=1
627	TRUE	P27797|CALR_HUMAN	2.28	21.58	6	6		3047.42	3497.49	1885.33	1923.21	1992.98	1667.57	5322.84	4643.92	1.02:1.17:0.63:0.64:0.66:0.56:1.78:1.55	2588.36	3406.83	0.86:1.14	48142	Calreticulin OS=Homo sapiens OX=9606 GN=CALR PE=1 SV=1
96	TRUE	Q29RF7|PDS5A_HUMAN	8.13	26.93	27	27	Carbamidomethylation; Oxidation (M)	13655.2	12920	1943.12	1812.44	15508	9825.81	12693.5	13531.4	1.33:1.26:0.19:0.18:1.52:0.96:1.24:1.32	7582.7	12889.7	0.74:1.26	150830	Sister chromatid cohesion protein PDS5 homolog A OS=Homo sapiens OX=9606 GN=PDS5A PE=1 SV=1
237	TRUE	Q96J84|KIRR1_HUMAN	4.32	24.97	14	14	Oxidation (M)	7942.6	5027.1	2594.79	2700.22	6086.08	3569.12	6737.63	6230.78	1.55:0.98:0.51:0.53:1.19:0.70:1.32:1.22	4566.18	5655.9	0.89:1.11	83536	Kin of IRRE-like protein 1 OS=Homo sapiens OX=9606 GN=KIRREL1 PE=1 SV=2
465	TRUE	P04040|CATA_HUMAN	4.66	15.94	6	6	Carbamidomethylation	2292.37	2716.38	299.063	75.1948	1273.03	752.574	2280.64	2712.28	1.48:1.75:0.19:0.05:0.82:0.49:1.47:1.75	1721.88	1754.63	0.99:1.01	59756	Catalase OS=Homo sapiens OX=9606 GN=CAT PE=1 SV=3
473	TRUE	P78536|ADA17_HUMAN	6.52	12.5	8	8	Oxidation (M)	19844	14289.6	9205.97	9008.13	17185.2	11405.7	21045.8	20703.4	1.29:0.93:0.60:0.59:1.12:0.74:1.37:1.35	13086.9	17585	0.85:1.15	93021	Disintegrin and metalloproteinase domain-containing protein 17 OS=Homo sapiens OX=9606 GN=ADAM17 PE=1 SV=1
57	TRUE	Q14008|CKAP5_HUMAN	1.37	26.38	46	46	Carbamidomethylation; Oxidation (M)	7544.77	6738.09	5593.18	5204.76	5372.98	3688.21	11950.1	4177.2	1.20:1.07:0.89:0.83:0.86:0.59:1.90:0.66	6270.2	6945.7	0.95:1.05	225495	Cytoskeleton-associated protein 5 OS=Homo sapiens OX=9606 GN=CKAP5 PE=1 SV=3
1078	TRUE	Q9BRK4|LZTS2_HUMAN	2.54	4.78	2	2		878.13	834.934	141.462	2799.55	821.135	358.545	380.13	522.587	1.04:0.99:0.17:3.32:0.98:0.43:0.45:0.62	1308.62	520.599	1.43:0.57	72759	Leucine zipper putative tumor suppressor 2 OS=Homo sapiens OX=9606 GN=LZTS2 PE=1 SV=2
835	TRUE	Q14114|LRP8_HUMAN	5.21	4.05	3	3		2293.23	2792.86	313.477	418.069	1920.92	1481.24	1857.14	2096.43	1.39:1.70:0.19:0.25:1.17:0.90:1.13:1.27	1501.92	1838.93	0.90:1.10	105634	Low-density lipoprotein receptor-related protein 8 OS=Homo sapiens OX=9606 GN=LRP8 PE=1 SV=4
742	TRUE	Q6ZRP7|QSOX2_HUMAN	0.68	11.32	6	6		3324.26	3347.32	90.1555	387.101	754.523	617.359	1055.96	1573.1	2.39:2.40:0.06:0.28:0.54:0.44:0.76:1.13	2687.8	1079.97	1.43:0.57	77529	Sulfhydryl oxidase 2 OS=Homo sapiens OX=9606 GN=QSOX2 PE=1 SV=3
630	TRUE	O75116|ROCK2_HUMAN	1.28	3.24	4	3	Oxidation (M)	509.012	585.502	889.536	779.976	694.342	400.743	368.121	4599.03	0.46:0.53:0.81:0.71:0.63:0.36:0.33:4.17	834.278	1610.93	0.68:1.32	160900	Rho-associated protein kinase 2 OS=Homo sapiens OX=9606 GN=ROCK2 PE=1 SV=4
533	TRUE	P21796|VDAC1_HUMAN	7.62	43.46	9	9		11929.3	12266.7	6622.68	6396.75	6024.05	6417.78	7120.89	7206.27	1.49:1.53:0.83:0.80:0.75:0.80:0.89:0.90	9303.85	6692.24	1.16:0.84	30773	Voltage-dependent anion-selective channel protein 1 OS=Homo sapiens OX=9606 GN=VDAC1 PE=1 SV=2
670	TRUE	Q9HBM0|VEZA_HUMAN	7.52	7.7	5	5	Oxidation (M)	3069.67	3794.03	541.764	505.594	3332.34	2309.65	3346.35	3644.29	1.20:1.48:0.21:0.20:1.30:0.90:1.30:1.42	2258.72	3158.16	0.83:1.17	88665	Vezatin OS=Homo sapiens OX=9606 GN=VEZT PE=1 SV=3
1213	TRUE	Q86UN2|R4RL1_HUMAN	15.93	5.9	2	2		469.271	1355.2	308.526	276.659	0	86.3122	54.8923	0	1.47:4.25:0.97:0.87:0.00:0.27:0.17:0.00	885.335	70.6022	1.85:0.15	49065	Reticulon-4 receptor-like 1 OS=Homo sapiens OX=9606 GN=RTN4RL1 PE=1 SV=1
178	TRUE	Q9Y4B5|MTCL1_HUMAN	0.53	11.92	18	18	Oxidation (M)	2825.32	3262.47	453.082	419.735	1826.49	919.732	844.572	865.287	1.98:2.29:0.32:0.29:1.28:0.64:0.59:0.61	1740.15	1114.02	1.22:0.78	209526	Microtubule cross-linking factor 1 OS=Homo sapiens OX=9606 GN=MTCL1 PE=1 SV=5
491	TRUE	Q9UKS6|PACN3_HUMAN	1.73	24.29	8	8	Oxidation (M)	22782	6149.18	3952.62	4201.65	7656.32	8953.45	7345.64	9653.65	2.58:0.70:0.45:0.48:0.87:1.01:0.83:1.09	9271.37	8402.27	1.05:0.95	48487	Protein kinase C and casein kinase substrate in neurons protein 3 OS=Homo sapiens OX=9606 GN=PACSIN3 PE=1 SV=2
322	TRUE	P08648|ITA5_HUMAN	8.95	19.45	14	14	Oxidation (M)	33133.8	33177.2	7473.37	4398.92	50554.4	33510	29082.4	31742.4	1.19:1.19:0.27:0.16:1.81:1.20:1.04:1.14	19545.8	36222.3	0.70:1.30	114536	Integrin alpha-5 OS=Homo sapiens OX=9606 GN=ITGA5 PE=1 SV=2
231	TRUE	Q92797|SYMPK_HUMAN	2.67	15.78	14	14	Oxidation (M)	6846.32	6873.67	641.843	409.013	5292.77	1710.56	3160.7	3342.17	1.94:1.94:0.18:0.12:1.50:0.48:0.89:0.95	3692.71	3376.55	1.04:0.96	141148	Symplekin OS=Homo sapiens OX=9606 GN=SYMPK PE=1 SV=2
386	TRUE	Q99714|HCD2_HUMAN	3.43	68.2	10	10	Oxidation (M)	5677.19	5723.4	569.062	856.182	5305.7	1560.13	4624.53	3545.91	1.63:1.64:0.16:0.25:1.52:0.45:1.33:1.02	3206.46	3759.07	0.92:1.08	26923	3-hydroxyacyl-CoA dehydrogenase type-2 OS=Homo sapiens OX=9606 GN=HSD17B10 PE=1 SV=3
977	TRUE	Q96D53|COQ8B_HUMAN	11.45	6.62	2	2		189.801	350.315	451.74	115.311	485.237	768.191	718.443	321.313	0.45:0.82:1.06:0.27:1.14:1.81:1.69:0.76	448.846	755.168	0.75:1.25	60069	Atypical kinase COQ8B, mitochondrial OS=Homo sapiens OX=9606 GN=COQ8B PE=1 SV=2
872	TRUE	O43865|SAHH2_HUMAN	0.14	8.87	4	4	Carbamidomethylation; Oxidation (M)	2305.93	5406.5	817.863	677.21	2348.76	597.727	1820.12	2443.96	1.12:2.63:0.40:0.33:1.14:0.29:0.89:1.19	2301.88	1802.64	1.12:0.88	58951	S-adenosylhomocysteine hydrolase-like protein 1 OS=Homo sapiens OX=9606 GN=AHCYL1 PE=1 SV=2
436	TRUE	Q8N3R9|MPP5_HUMAN	3.43	21.19	10	10	Oxidation (M)	2386.54	2176.84	757.982	753.156	1803.64	1392.7	1853.63	1813.32	1.48:1.35:0.47:0.47:1.12:0.86:1.15:1.12	1518.63	1715.82	0.94:1.06	77294	MAGUK p55 subfamily member 5 OS=Homo sapiens OX=9606 GN=MPP5 PE=1 SV=3
494	TRUE	O60291|MGRN1_HUMAN	0.05	20.29	8	8	Oxidation (M)	10535.7	10512.5	706.019	1012.21	3735.11	1290.9	3630.13	4314.49	2.36:2.35:0.16:0.23:0.84:0.29:0.81:0.97	6422.33	3242.66	1.33:0.67	60753	E3 ubiquitin-protein ligase MGRN1 OS=Homo sapiens OX=9606 GN=MGRN1 PE=1 SV=2
415	TRUE	P10321|HLAC_HUMAN	17.18	10.66	8	3	Carbamidomethylation	13695.4	13663.7	9742.31	14003.5	9869.93	7079.69	4854.39	3499.12	1.43:1.43:1.02:1.47:1.03:0.74:0.51:0.37	12776.2	6325.78	1.34:0.66	40649	HLA class I histocompatibility antigen, C alpha chain OS=Homo sapiens OX=9606 GN=HLA-C PE=1 SV=3
30	TRUE	P49368|TCPG_HUMAN	8.76	72.11	47	47	Carbamidomethylation; Oxidation (M)	301827	287549	138691	140183	341164	221904	332007	365531	1.13:1.08:0.52:0.53:1.28:0.83:1.25:1.37	217063	315151	0.82:1.18	60534	T-complex protein 1 subunit gamma OS=Homo sapiens OX=9606 GN=CCT3 PE=1 SV=4
965	TRUE	Q13572|ITPK1_HUMAN	2.41	8.21	2	2		384.352	458.793	116.276	112.982	409.748	90.2215	446.672	526.854	1.21:1.44:0.37:0.36:1.29:0.28:1.40:1.66	320.781	368.374	0.93:1.07	45621	Inositol-tetrakisphosphate 1-kinase OS=Homo sapiens OX=9606 GN=ITPK1 PE=1 SV=2
383	TRUE	P15531|NDKA_HUMAN	0.58	47.37	8	8	Oxidation (M)	26122.4	23749.6	1369.69	1497.02	14098.1	5615.84	4466.88	6316.09	2.51:2.28:0.13:0.14:1.36:0.54:0.43:0.61	13184.7	7624.22	1.27:0.73	17149	Nucleoside diphosphate kinase A OS=Homo sapiens OX=9606 GN=NME1 PE=1 SV=1
732	TRUE	Q01831|XPC_HUMAN	7.69	7.02	5	5	Oxidation (M)	1897.37	1708.94	81.7519	78.4845	157.826	66.4229	92.705	68.6901	3.66:3.29:0.16:0.15:0.30:0.13:0.18:0.13	1568.57	96.4111	1.88:0.12	105953	DNA repair protein complementing XP-C cells OS=Homo sapiens OX=9606 GN=XPC PE=1 SV=4
632	TRUE	O15260|SURF4_HUMAN	1.59	19.7	4	4	Oxidation (M)	16624.5	16596.8	3667.86	3165.11	7160.3	3066.54	6553.28	9458.04	2.01:2.00:0.44:0.38:0.86:0.37:0.79:1.14	11940.7	6559.54	1.29:0.71	30394	Surfeit locus protein 4 OS=Homo sapiens OX=9606 GN=SURF4 PE=1 SV=3
287	TRUE	Q04917|1433F_HUMAN	15.02	28.86	6	6	Oxidation (M)	15885.6	15612.3	8392.61	7446.47	24526.5	18896	19033.4	18583.1	0.99:0.97:0.52:0.46:1.53:1.18:1.19:1.16	11834.3	20259.8	0.74:1.26	28219	14-3-3 protein eta OS=Homo sapiens OX=9606 GN=YWHAH PE=1 SV=4
102	TRUE	P06756|ITAV_HUMAN	1.4	27.86	25	25	Carbamidomethylation; Oxidation (M)	58768.8	57710.6	35758.5	34913.8	44487.7	32309.7	45133.4	50525.7	1.31:1.28:0.80:0.78:0.99:0.72:1.00:1.12	46787.9	43114.1	1.04:0.96	116038	Integrin alpha-V OS=Homo sapiens OX=9606 GN=ITGAV PE=1 SV=2
228	TRUE	P23471|PTPRZ_HUMAN	16.29	8.42	15	15	Oxidation (M)	2647.43	2573.24	1317.28	946.824	3291.73	3220.07	4647.38	4928.15	0.90:0.87:0.45:0.32:1.12:1.09:1.58:1.67	1871.19	4021.83	0.64:1.36	254587	Receptor-type tyrosine-protein phosphatase zeta OS=Homo sapiens OX=9606 GN=PTPRZ1 PE=1 SV=4
663	TRUE	P10301|RRAS_HUMAN	2.26	27.98	6	5		14651.8	14630.8	3216.31	2994.83	6950.19	3836.55	6160.43	4374.03	2.06:2.06:0.45:0.42:0.98:0.54:0.87:0.62	8947.1	5554.74	1.23:0.77	23480	Ras-related protein R-Ras OS=Homo sapiens OX=9606 GN=RRAS PE=1 SV=1
802	TRUE	Q29980|MICB_HUMAN	4.54	14.88	3	3	Oxidation (M)	2188.52	1893.95	395.871	208.264	698.665	129.26	489.392	476.536	2.70:2.34:0.49:0.26:0.86:0.16:0.60:0.59	1712.75	499.897	1.55:0.45	42575	MHC class I polypeptide-related sequence B OS=Homo sapiens OX=9606 GN=MICB PE=1 SV=2
395	TRUE	Q06481|APLP2_HUMAN	8.42	21.1	12	12	Oxidation (M)	3509.19	7279.06	1283.27	1487.53	6333.68	3153.87	6104.95	8546.65	0.74:1.54:0.27:0.32:1.34:0.67:1.30:1.81	3389.76	6034.79	0.72:1.28	86956	Amyloid-like protein 2 OS=Homo sapiens OX=9606 GN=APLP2 PE=1 SV=2
1061	TRUE	Q9BZM5|ULBP2_HUMAN	5.62	12.6	3	3		565.097	508.874	1009.35	1062.86	884.253	2334.68	608.01	1293.55	0.55:0.49:0.98:1.03:0.86:2.26:0.59:1.25	900.997	1376.68	0.79:1.21	27368	UL16-binding protein 2 OS=Homo sapiens OX=9606 GN=ULBP2 PE=1 SV=1
442	TRUE	O75330|HMMR_HUMAN	1.2	17.54	10	10		1087.32	1187.15	4037.32	4060.44	949.392	4689.88	3111.74	2908.63	0.39:0.43:1.47:1.47:0.34:1.70:1.13:1.06	2593.06	2914.91	0.94:1.06	84100	Hyaluronan mediated motility receptor OS=Homo sapiens OX=9606 GN=HMMR PE=1 SV=2
660	TRUE	Q9UEW8|STK39_HUMAN	7.41	15.96	6	6	Oxidation (M)	11334.8	11429.5	1919.5	2089.1	15481.2	6751.07	8656.56	15313.7	1.24:1.25:0.21:0.23:1.70:0.74:0.95:1.68	6693.23	11550.6	0.73:1.27	59474	STE20/SPS1-related proline-alanine-rich protein kinase OS=Homo sapiens OX=9606 GN=STK39 PE=1 SV=3
463	TRUE	Q9H307|PININ_HUMAN	5.74	15.2	9	9	Oxidation (M)	6334.34	4874.81	1913.8	2117.71	3501.99	4109.97	7902.85	6157.58	1.37:1.06:0.41:0.46:0.76:0.89:1.71:1.33	3810.17	5418.1	0.83:1.17	81628	Pinin OS=Homo sapiens OX=9606 GN=PNN PE=1 SV=5
505	TRUE	Q9NR80|ARHG4_HUMAN	0.01	14.49	8	8	Oxidation (M)	3877.19	3380.13	3767.28	551.074	2565.28	1350.2	2207.87	3542.68	1.46:1.27:1.42:0.21:0.97:0.51:0.83:1.33	2893.92	2416.51	1.09:0.91	79067	Rho guanine nucleotide exchange factor 4 OS=Homo sapiens OX=9606 GN=ARHGEF4 PE=1 SV=3
88	TRUE	Q14160|SCRIB_HUMAN	6.15	29.45	31	31	Oxidation (M)	14633.1	14548.6	3748.13	2728.26	12602.4	9661.51	11842	15969.1	1.37:1.36:0.35:0.25:1.18:0.90:1.11:1.49	8914.52	12518.8	0.83:1.17	174885	Protein scribble homolog OS=Homo sapiens OX=9606 GN=SCRIB PE=1 SV=4
229	TRUE	Q9Y624|JAM1_HUMAN	5.87	49.5	15	15	Carbamidomethylation; Oxidation (M)	89120.6	77428.4	39696.1	38764.4	87864.7	66463.4	71726	78590.8	1.30:1.13:0.58:0.56:1.28:0.97:1.04:1.14	61252.3	76161.2	0.89:1.11	32583	Junctional adhesion molecule A OS=Homo sapiens OX=9606 GN=F11R PE=1 SV=1
32	TRUE	Q14573|ITPR3_HUMAN	3.96	22.76	49	45	Carbamidomethylation; Oxidation (M)	18731	18637.8	2428.8	2132.46	10715.7	6358.24	17429	15898.9	1.62:1.61:0.21:0.18:0.93:0.55:1.51:1.38	10482.5	12600.5	0.91:1.09	304106	Inositol 1,4,5-trisphosphate receptor type 3 OS=Homo sapiens OX=9606 GN=ITPR3 PE=1 SV=2
497	TRUE	Q9NYT0|PLEK2_HUMAN	12.22	20.4	6	6	Acetylation (N-term); Oxidation (M)	29917.5	26276.4	12472.8	11698.9	2252.58	24836.2	829.119	2028.85	2.17:1.91:0.90:0.85:0.16:1.80:0.06:0.15	20091.4	7486.69	1.46:0.54	39971	Pleckstrin-2 OS=Homo sapiens OX=9606 GN=PLEK2 PE=1 SV=1
1051	TRUE	Q9P246|STIM2_HUMAN	2.56	3.62	2	2	Oxidation (M)	1023.28	957.294	410.024	162.68	905.133	462.613	586.23	839.25	1.53:1.43:0.61:0.24:1.35:0.69:0.88:1.26	683.434	732.553	0.97:1.03	83971	Stromal interaction molecule 2 OS=Homo sapiens OX=9606 GN=STIM2 PE=1 SV=2
640	TRUE	Q13418|ILK_HUMAN	6.17	15.49	6	6	Oxidation (M)	8643.48	10516.9	2594.64	2412.51	8174.59	6238.81	9039.37	9933.6	1.20:1.46:0.36:0.34:1.14:0.87:1.26:1.38	6041.89	8346.59	0.84:1.16	51419	Integrin-linked protein kinase OS=Homo sapiens OX=9606 GN=ILK PE=1 SV=2
145	TRUE	Q9Y5S2|MRCKB_HUMAN	18.11	15.43	23	23	Oxidation (M)	1648.19	1846.06	1085.8	1068.77	2028.59	2609.88	5267.52	4748.21	0.65:0.73:0.43:0.42:0.80:1.03:2.08:1.87	1412.2	3663.55	0.56:1.44	194315	Serine/threonine-protein kinase MRCK beta OS=Homo sapiens OX=9606 GN=CDC42BPB PE=1 SV=2
43	TRUE	O15031|PLXB2_HUMAN	6.65	32.15	48	47	Carbamidomethylation; Oxidation (M)	67467.6	62731.7	21542.1	19713.3	76952.5	39622.5	61435.7	71926.1	1.28:1.19:0.41:0.37:1.46:0.75:1.17:1.37	42863.7	62484.2	0.81:1.19	205127	Plexin-B2 OS=Homo sapiens OX=9606 GN=PLXNB2 PE=1 SV=3
381	TRUE	Q9NTJ5|SAC1_HUMAN	0.53	21.29	11	11	Oxidation (M)	3801.68	3188.07	3148.5	324.692	815.147	3998.56	1653.23	1529.25	1.65:1.38:1.36:0.14:0.35:1.73:0.72:0.66	2870.26	1999.05	1.18:0.82	66967	Phosphatidylinositol-3-phosphatase SAC1 OS=Homo sapiens OX=9606 GN=SACM1L PE=1 SV=2
1070	TRUE	P55283|CADH4_HUMAN	11.35	2.62	3	2		177.691	56.6873	223.782	0	498.207	424.956	324.277	201.839	0.75:0.24:0.94:0.00:2.09:1.78:1.36:0.85	229.08	362.32	0.77:1.23	100281	Cadherin-4 OS=Homo sapiens OX=9606 GN=CDH4 PE=2 SV=2
60	TRUE	P53618|COPB_HUMAN	0.28	47.32	37	37	Carbamidomethylation; Oxidation (M)	55821.1	55211.5	11655.1	16033.4	33281.6	23644	26000.3	32220.3	1.76:1.74:0.37:0.51:1.05:0.75:0.82:1.02	34680.3	28786.6	1.09:0.91	107142	Coatomer subunit beta OS=Homo sapiens OX=9606 GN=COPB1 PE=1 SV=3
245	TRUE	P04083|ANXA1_HUMAN	6.08	43.06	10	10	Oxidation (M)	14019.9	12627.1	5490.35	5530.85	16933.4	10766.8	10744.8	11422.5	1.28:1.15:0.50:0.51:1.55:0.98:0.98:1.04	9417.06	12466.9	0.86:1.14	38714	Annexin A1 OS=Homo sapiens OX=9606 GN=ANXA1 PE=1 SV=2
1000	TRUE	Q13642|FHL1_HUMAN	6.14	11.15	3	3	Carbamidomethylation	9196.56	7881.36	1812.84	2695.4	3122.33	3197.02	1821.72	2190.2	2.31:1.98:0.45:0.68:0.78:0.80:0.46:0.55	5396.54	2582.82	1.35:0.65	36263	Four and a half LIM domains protein 1 OS=Homo sapiens OX=9606 GN=FHL1 PE=1 SV=4
186	TRUE	O00429|DNM1L_HUMAN	0.06	33.02	16	16	Oxidation (M)	4917.82	4876.85	3301.47	476.393	1595.74	3892.44	2435.31	2397.7	1.65:1.63:1.11:0.16:0.53:1.30:0.82:0.80	3393.13	2580.3	1.14:0.86	81877	Dynamin-1-like protein OS=Homo sapiens OX=9606 GN=DNM1L PE=1 SV=2
293	TRUE	Q8NFD5|ARI1B_HUMAN	3.4	6.44	10	10		6183.48	5821.31	1016.54	4182.45	4366.39	10041.7	3453.5	4681.8	1.24:1.17:0.20:0.84:0.88:2.02:0.70:0.94	4639.7	5635.84	0.90:1.10	236123	AT-rich interactive domain-containing protein 1B OS=Homo sapiens OX=9606 GN=ARID1B PE=1 SV=2
1023	TRUE	Q14289|FAK2_HUMAN	8.4	4.26	3	3		1156.75	686.338	292.474	330.45	876.141	852.308	824.045	1158.36	1.50:0.89:0.38:0.43:1.13:1.10:1.07:1.50	771.79	976.48	0.88:1.12	115875	Protein-tyrosine kinase 2-beta OS=Homo sapiens OX=9606 GN=PTK2B PE=1 SV=2
212	TRUE	Q6UVK1|CSPG4_HUMAN	21.35	5.99	9	9	Oxidation (M)	2177.52	5452.43	1681.36	1316.85	310.926	802.141	577.353	234.418	1.39:3.47:1.07:0.84:0.20:0.51:0.37:0.15	2657.04	481.209	1.69:0.31	250537	Chondroitin sulfate proteoglycan 4 OS=Homo sapiens OX=9606 GN=CSPG4 PE=1 SV=2
702	TRUE	P15260|INGR1_HUMAN	7.75	18	6	6		5005.14	4921.16	1391.22	1029.56	4290.49	4046.17	4963.88	5809.56	1.27:1.25:0.35:0.26:1.09:1.03:1.26:1.48	3086.77	4777.53	0.79:1.21	54405	Interferon gamma receptor 1 OS=Homo sapiens OX=9606 GN=IFNGR1 PE=1 SV=1
874	TRUE	P48067|SC6A9_HUMAN	9.65	7.51	4	4		1466.7	1563.47	898.796	547.183	1918.98	1501.95	2300.97	1335.59	1.02:1.08:0.62:0.38:1.33:1.04:1.60:0.93	1119.04	1764.37	0.78:1.22	78260	Sodium- and chloride-dependent glycine transporter 1 OS=Homo sapiens OX=9606 GN=SLC6A9 PE=1 SV=3
780	TRUE	Q99549|MPP8_HUMAN	2.42	4.07	2	2		4683.36	4375.07	99.3123	161.976	417.129	344.36	370.501	518.485	3.42:3.19:0.07:0.12:0.30:0.25:0.27:0.38	2649.54	412.619	1.73:0.27	97182	M-phase phosphoprotein 8 OS=Homo sapiens OX=9606 GN=MPHOSPH8 PE=1 SV=2
64	TRUE	P16615|AT2A2_HUMAN	7.57	34.45	35	35	Carbamidomethylation; Oxidation (M)	69223.8	72218.9	26277	27976.1	75133.2	52121.5	70594.8	80879.8	1.17:1.22:0.44:0.47:1.27:0.88:1.19:1.36	48923.9	69682.3	0.82:1.18	114757	Sarcoplasmic/endoplasmic reticulum calcium ATPase 2 OS=Homo sapiens OX=9606 GN=ATP2A2 PE=1 SV=1
784	TRUE	P36897|TGFR1_HUMAN	2.88	11.53	4	4	Oxidation (M)	8835.81	3932.01	1964.06	2016.16	4447.4	2510.9	2518.42	1553.24	2.54:1.13:0.57:0.58:1.28:0.72:0.73:0.45	4187.01	2757.49	1.21:0.79	55960	TGF-beta receptor type-1 OS=Homo sapiens OX=9606 GN=TGFBR1 PE=1 SV=1
19	TRUE	Q14980|NUMA1_HUMAN	4.27	43.22	74	74	Carbamidomethylation; Oxidation (M)	22422.3	20100.1	3250.24	3712.85	16198.2	6843.89	18998.4	25328.2	1.54:1.38:0.22:0.25:1.11:0.47:1.30:1.73	12371.4	16842.2	0.85:1.15	238260	Nuclear mitotic apparatus protein 1 OS=Homo sapiens OX=9606 GN=NUMA1 PE=1 SV=2
427	TRUE	P18564|ITB6_HUMAN	2.15	12.31	7	7	Oxidation (M)	68390.6	68382.9	32761.2	30274.5	47004.3	32371.3	41486.9	43958.2	1.50:1.50:0.72:0.66:1.03:0.71:0.91:0.96	49952.3	41205.2	1.10:0.90	85936	Integrin beta-6 OS=Homo sapiens OX=9606 GN=ITGB6 PE=1 SV=2
325	TRUE	Q8IUD2|RB6I2_HUMAN	6.44	8.78	9	9	Oxidation (M)	7368.98	7934.18	4706.16	4786.65	14065.6	6806.24	10772.3	5236.68	0.96:1.03:0.61:0.62:1.82:0.88:1.40:0.68	6198.99	9220.22	0.80:1.20	128086	ELKS/Rab6-interacting/CAST family member 1 OS=Homo sapiens OX=9606 GN=ERC1 PE=1 SV=1
456	TRUE	O95235|KI20A_HUMAN	22.03	11.12	8	8	Oxidation (M)	2989.37	3142.11	2212.81	2395.18	6230.2	6592.95	4538.53	3709.72	0.75:0.79:0.56:0.60:1.57:1.66:1.14:0.93	3236.6	5267.85	0.76:1.24	100278	Kinesin-like protein KIF20A OS=Homo sapiens OX=9606 GN=KIF20A PE=1 SV=1
171	TRUE	Q32MZ4|LRRF1_HUMAN	1.65	34.41	19	19	Carbamidomethylation; Oxidation (M)	30983.8	20998.1	8354.99	7527.21	11984.2	11078.3	16943.9	9729.57	2.11:1.43:0.57:0.51:0.82:0.75:1.15:0.66	16966	12434	1.15:0.85	89253	Leucine-rich repeat flightless-interacting protein 1 OS=Homo sapiens OX=9606 GN=LRRFIP1 PE=1 SV=2
446	TRUE	O60443|GSDME_HUMAN	1.59	22.98	10	10	Carbamidomethylation	9907.94	9928.26	1550.46	2286.14	5438.48	2974.08	2256.04	4032.16	2.07:2.07:0.32:0.48:1.13:0.62:0.47:0.84	5918.2	3675.19	1.23:0.77	54555	Gasdermin-E OS=Homo sapiens OX=9606 GN=GSDME PE=1 SV=2
99	TRUE	Q9UIQ6|LCAP_HUMAN	14.31	33.95	25	25	Carbamidomethylation; Oxidation (M)	12203.3	10400.8	2954.21	2084.9	17705.2	12052	23295.9	24314.2	0.93:0.79:0.23:0.16:1.35:0.92:1.77:1.85	6910.8	19341.8	0.53:1.47	117349	Leucyl-cystinyl aminopeptidase OS=Homo sapiens OX=9606 GN=LNPEP PE=1 SV=3
571	TRUE	Q12774|ARHG5_HUMAN	2.96	4.82	5	5	Oxidation (M)	1268.47	1132.81	239.447	150.231	999.236	538.142	647.399	718.779	1.78:1.59:0.34:0.21:1.40:0.76:0.91:1.01	861.257	725.889	1.09:0.91	176799	Rho guanine nucleotide exchange factor 5 OS=Homo sapiens OX=9606 GN=ARHGEF5 PE=1 SV=3
301	TRUE	P42892|ECE1_HUMAN	1.98	23.25	12	12	Oxidation (M)	6643.2	5982.49	1848.01	1689.55	3284.31	2092.96	6079.77	7629.84	1.51:1.36:0.42:0.38:0.75:0.47:1.38:1.73	4040.81	4771.72	0.92:1.08	87164	Endothelin-converting enzyme 1 OS=Homo sapiens OX=9606 GN=ECE1 PE=1 SV=2
291	TRUE	Q8N4S9|MALD2_HUMAN	10.04	21.86	11	11	Oxidation (M)	15654.4	14454.6	6545.74	7146.34	17232.9	13667.6	16723	16807.8	1.16:1.07:0.48:0.53:1.27:1.01:1.24:1.24	10950.3	16107.8	0.81:1.19	64168	MARVEL domain-containing protein 2 OS=Homo sapiens OX=9606 GN=MARVELD2 PE=1 SV=2
1127	TRUE	Q9ULV8|CBLC_HUMAN	2.79	4.43	2	2		1780.75	1325.14	217.999	131.518	574.371	183.151	397.319	249.454	2.93:2.18:0.36:0.22:0.95:0.30:0.65:0.41	997.824	477.121	1.35:0.65	52456	E3 ubiquitin-protein ligase CBL-C OS=Homo sapiens OX=9606 GN=CBLC PE=1 SV=3
515	TRUE	P23528|COF1_HUMAN	2.06	51.81	7	7	Acetylation (N-term); Carbamidomethylation	37215.7	40186	6179.22	6137.27	26735.8	16841	17083.9	22717.9	1.72:1.86:0.29:0.28:1.24:0.78:0.79:1.05	22429.6	20844.6	1.04:0.96	18502	Cofilin-1 OS=Homo sapiens OX=9606 GN=CFL1 PE=1 SV=3
933	TRUE	Q8TB37|NUBPL_HUMAN	22.2	14.42	3	3		597.744	457.34	544.858	545.134	705.467	824.41	1035.54	1212.61	0.81:0.62:0.74:0.74:0.95:1.11:1.40:1.64	696.35	1017.07	0.81:1.19	34083	Iron-sulfur protein NUBPL OS=Homo sapiens OX=9606 GN=NUBPL PE=1 SV=3
797	TRUE	P17813|EGLN_HUMAN	1.3	9.57	5	5		9452.48	9423.97	1541.83	1547.58	4234.75	2201.15	2209.41	4735.64	2.14:2.13:0.35:0.35:0.96:0.50:0.50:1.07	5491.47	3345.24	1.24:0.76	70578	Endoglin OS=Homo sapiens OX=9606 GN=ENG PE=1 SV=2
132	TRUE	Q9H5V8|CDCP1_HUMAN	4.05	29.9	23	23	Carbamidomethylation; Oxidation (M)	71319.6	73029.8	21383.5	21699	29344.2	27175.6	26072.8	31866.5	1.89:1.94:0.57:0.58:0.78:0.72:0.69:0.84	46858	28614.8	1.24:0.76	92932	CUB domain-containing protein 1 OS=Homo sapiens OX=9606 GN=CDCP1 PE=1 SV=3
101	TRUE	O00571|DDX3X_HUMAN	0.36	50.15	29	29	Acetylation (N-term); Carbamidomethylation; Oxidation (M)	79081.7	79414.8	23110.9	21456	55485	40769.2	39244.8	41003.1	1.67:1.67:0.49:0.45:1.17:0.86:0.83:0.86	50765.8	44125.5	1.07:0.93	73243	ATP-dependent RNA helicase DDX3X OS=Homo sapiens OX=9606 GN=DDX3X PE=1 SV=3
259	TRUE	P63244|RACK1_HUMAN	0.07	67.82	14	14	Carbamidomethylation; Oxidation (M)	87525.4	94153.3	37865.1	40820.5	65229.6	52593.4	65189.1	58062.8	1.40:1.50:0.60:0.65:1.04:0.84:1.04:0.93	65091.1	60268.7	1.04:0.96	35077	Receptor of activated protein C kinase 1 OS=Homo sapiens OX=9606 GN=RACK1 PE=1 SV=3
126	TRUE	Q14C86|GAPD1_HUMAN	2.46	21.31	26	26	Oxidation (M)	19220.8	19627.8	4575.77	4052.59	16366.5	10301.3	10850.1	11296.7	1.60:1.63:0.38:0.34:1.36:0.86:0.90:0.94	11869.3	12203.7	0.99:1.01	164980	GTPase-activating protein and VPS9 domain-containing protein 1 OS=Homo sapiens OX=9606 GN=GAPVD1 PE=1 SV=2
264	TRUE	Q9Y5Y6|ST14_HUMAN	17.5	21.4	15	15	Carbamidomethylation	31921.9	31877.9	18083.2	16927.7	42363.2	35098.8	54257.2	51840.1	0.90:0.90:0.51:0.48:1.20:0.99:1.54:1.47	25497	46473.6	0.71:1.29	94770	Suppressor of tumorigenicity 14 protein OS=Homo sapiens OX=9606 GN=ST14 PE=1 SV=2
111	TRUE	Q8TDM6|DLG5_HUMAN	10.27	19.49	29	29	Oxidation (M)	5149.11	8136.25	874.293	1171.71	9747.39	6456.1	7512.79	7414.85	0.89:1.40:0.15:0.20:1.68:1.11:1.29:1.28	3832.84	7782.78	0.66:1.34	213868	Disks large homolog 5 OS=Homo sapiens OX=9606 GN=DLG5 PE=1 SV=4
1028	TRUE	P49768|PSN1_HUMAN	0.44	8.57	3	3	Oxidation (M)	1222.97	977.17	0	0	1907.79	1133.61	979.174	550.581	1.44:1.15:0.00:0.00:2.25:1.34:1.16:0.65	1100.07	1142.79	0.98:1.02	52668	Presenilin-1 OS=Homo sapiens OX=9606 GN=PSEN1 PE=1 SV=1
468	TRUE	Q99816|TS101_HUMAN	12.69	22.31	7	7	Oxidation (M)	1138.37	1091.63	1105.39	1830.93	1260.54	6665.76	2758.1	3674.56	0.47:0.45:0.45:0.75:0.52:2.73:1.13:1.51	1291.58	3589.74	0.53:1.47	43944	Tumor susceptibility gene 101 protein OS=Homo sapiens OX=9606 GN=TSG101 PE=1 SV=2
131	TRUE	Q9UJS0|CMC2_HUMAN	7.41	48.15	25	25	Carbamidomethylation; Oxidation (M)	20573.5	19311.7	6115.73	6474.1	23374.7	12375.7	23209.4	21461.7	1.24:1.16:0.37:0.39:1.41:0.74:1.40:1.29	13118.8	20105.4	0.79:1.21	74176	Calcium-binding mitochondrial carrier protein Aralar2 OS=Homo sapiens OX=9606 GN=SLC25A13 PE=1 SV=2
744	TRUE	Q6IQ49|SDE2_HUMAN	7.91	15.74	5	5	Oxidation (M)	1790.84	1568.49	143.117	61.1737	2110.59	911.364	1606.14	2107.59	1.39:1.22:0.11:0.05:1.64:0.71:1.25:1.64	1177.78	1832.07	0.78:1.22	49742	Replication stress response regulator SDE2 OS=Homo sapiens OX=9606 GN=SDE2 PE=1 SV=1
1096	TRUE	Q6UXD5|SE6L2_HUMAN	7.05	4.07	2	2	Oxidation (M)	809.991	891.676	662.251	720.249	853.506	589.172	2315.83	2404.66	0.70:0.77:0.57:0.62:0.74:0.51:2.00:2.08	771.042	1540.79	0.67:1.33	97560	Seizure 6-like protein 2 OS=Homo sapiens OX=9606 GN=SEZ6L2 PE=1 SV=2
949	TRUE	Q86WJ1|CHD1L_HUMAN	27.37	2.56	2	2		2735.8	2784.62	1965.35	2293.76	606.022	928.775	1329.16	627.544	1.65:1.68:1.18:1.38:0.37:0.56:0.80:0.38	2596.89	916.8	1.48:0.52	101000	Chromodomain-helicase-DNA-binding protein 1-like OS=Homo sapiens OX=9606 GN=CHD1L PE=1 SV=3
693	TRUE	P09497|CLCB_HUMAN	8.08	13.1	3	3		927.508	1266.01	562.312	670.5	1226.58	805.634	1235.65	1611.48	0.89:1.22:0.54:0.65:1.18:0.78:1.19:1.55	856.583	1219.83	0.83:1.17	25190	Clathrin light chain B OS=Homo sapiens OX=9606 GN=CLTB PE=1 SV=1
61	TRUE	P0DMV8|HS71A_HUMAN	4.82	27.3	30	14	Acetylation (N-term); Carbamidomethylation; Oxidation (M)	59963	61372.1	13077.5	13222.4	66155.3	43921	35640.4	43230.9	1.43:1.46:0.31:0.31:1.57:1.04:0.85:1.03	36908.8	47236.9	0.88:1.12	70052	Heat shock 70 kDa protein 1A OS=Homo sapiens OX=9606 GN=HSPA1A PE=1 SV=1
507	TRUE	O60645|EXOC3_HUMAN	2.65	15.44	8	8		3004.96	3430.53	876.274	677.557	2774.18	978.712	2608.66	3087.95	1.38:1.57:0.40:0.31:1.27:0.45:1.20:1.42	1997.33	2362.38	0.92:1.08	85567	Exocyst complex component 3 OS=Homo sapiens OX=9606 GN=EXOC3 PE=1 SV=3
354	TRUE	P51148|RAB5C_HUMAN	3.3	44.44	9	6	Oxidation (M)	24851.5	24875.2	5746.15	4413.28	19728.1	10428.2	16508.2	21087.5	1.56:1.56:0.36:0.28:1.24:0.65:1.03:1.32	14971.5	16938	0.94:1.06	23483	Ras-related protein Rab-5C OS=Homo sapiens OX=9606 GN=RAB5C PE=1 SV=2
1107	TRUE	O95197|RTN3_HUMAN	4.56	2.23	2	2		18500.7	19490.9	2422.96	2657.91	14754.2	8853.77	13450.9	14686.1	1.56:1.64:0.20:0.22:1.24:0.75:1.13:1.24	10888.5	12936.2	0.91:1.09	112611	Reticulon-3 OS=Homo sapiens OX=9606 GN=RTN3 PE=1 SV=2
69	TRUE	P26006|ITA3_HUMAN	2.17	29.21	30	30	Carbamidomethylation; Oxidation (M)	166934	168437	68977.6	70776.3	143181	101066	127583	131791	1.36:1.38:0.56:0.58:1.17:0.83:1.04:1.08	118781	125905	0.97:1.03	116612	Integrin alpha-3 OS=Homo sapiens OX=9606 GN=ITGA3 PE=1 SV=5
575	TRUE	P27448|MARK3_HUMAN	0.84	9.03	7	5		1555.39	1288	254.654	238.274	909.225	414.69	285.571	666.244	2.22:1.84:0.36:0.34:1.30:0.59:0.41:0.95	909.619	609.452	1.20:0.80	84428	MAP/microtubule affinity-regulating kinase 3 OS=Homo sapiens OX=9606 GN=MARK3 PE=1 SV=5
534	TRUE	P06213|INSR_HUMAN	5.93	1.59	6	2		111680	1864.86	19782	20105.8	46440.9	42966.5	53920.2	53427.3	2.55:0.04:0.45:0.46:1.06:0.98:1.23:1.22	38358.2	49188.7	0.88:1.12	156333	Insulin receptor OS=Homo sapiens OX=9606 GN=INSR PE=1 SV=4
886	TRUE	Q9P0K1|ADA22_HUMAN	4.42	4.86	3	3	Oxidation (M)	879.704	285.923	135.306	138.706	228.368	390.984	678.723	562.781	2.13:0.69:0.33:0.34:0.55:0.95:1.65:1.36	539.996	505.005	1.03:0.97	100433	Disintegrin and metalloproteinase domain-containing protein 22 OS=Homo sapiens OX=9606 GN=ADAM22 PE=1 SV=1
919	TRUE	Q15165|PON2_HUMAN	1.39	15.54	3	3		1472.65	1682.37	0	134.359	806.832	286.939	729.744	454.16	2.12:2.42:0.00:0.19:1.16:0.41:1.05:0.65	1160.91	602.022	1.32:0.68	39381	Serum paraoxonase/arylesterase 2 OS=Homo sapiens OX=9606 GN=PON2 PE=1 SV=4
20	TRUE	P35908|K22E_HUMAN	12.24	62.44	59	40	Oxidation (M)	224679	224525	80795.2	81469.7	263074	190118	393107	432512	0.95:0.95:0.34:0.34:1.11:0.80:1.66:1.83	152867	319703	0.65:1.35	65433	Keratin, type II cytoskeletal 2 epidermal OS=Homo sapiens OX=9606 GN=KRT2 PE=1 SV=2
634	TRUE	P07947|YES_HUMAN	2.89	15.47	7	5	Oxidation (M)	6385.47	5178.8	839.027	550.02	3397.82	1746.66	3563.5	4446.31	1.96:1.59:0.26:0.17:1.04:0.54:1.09:1.36	3238.33	3288.57	0.99:1.01	60801	Tyrosine-protein kinase Yes OS=Homo sapiens OX=9606 GN=YES1 PE=1 SV=3
1086	TRUE	Q9H9K5|MER34_HUMAN	0.45	4.44	2	2		4670.51	4402.06	858.73	971.587	2449.25	2146.85	1353.03	1878.76	1.99:1.88:0.37:0.41:1.05:0.92:0.58:0.80	2725.72	1956.97	1.16:0.84	63547	Endogenous retroviral envelope protein HEMO OS=Homo sapiens OX=9606 GN=ERVMER34-1 PE=1 SV=1
263	TRUE	Q9NV70|EXOC1_HUMAN	7.11	18.46	12	12	Oxidation (M)	4431.66	4274.51	739.319	767.007	5158.38	2510.3	4317.24	4245.1	1.34:1.29:0.22:0.23:1.56:0.76:1.31:1.28	2553.12	4057.75	0.77:1.23	101982	Exocyst complex component 1 OS=Homo sapiens OX=9606 GN=EXOC1 PE=1 SV=4
719	TRUE	P06703|S10A6_HUMAN	8.32	28.89	2	2	Acetylation (N-term); Carbamidomethylation; Oxidation (M)	36428.7	35644.3	5489.57	5707.43	47857.1	20171.8	42719.9	45200.1	1.22:1.19:0.18:0.19:1.60:0.67:1.43:1.51	20817.5	38987.2	0.70:1.30	10180	Protein S100-A6 OS=Homo sapiens OX=9606 GN=S100A6 PE=1 SV=1
934	TRUE	O15498|YKT6_HUMAN	1.05	22.22	3	3	Oxidation (M)	2022.74	1440.98	221.481	173.752	847.53	337.794	402.272	458.833	2.74:1.95:0.30:0.24:1.15:0.46:0.54:0.62	1161.06	559.419	1.35:0.65	22418	Synaptobrevin homolog YKT6 OS=Homo sapiens OX=9606 GN=YKT6 PE=1 SV=1
218	TRUE	Q99569|PKP4_HUMAN	7.48	14.93	14	14		3739.25	3192.2	5782.62	3324.66	3843.12	2262.05	3068.76	2976.92	1.06:0.91:1.64:0.94:1.09:0.64:0.87:0.84	4009.68	3037.71	1.14:0.86	131868	Plakophilin-4 OS=Homo sapiens OX=9606 GN=PKP4 PE=1 SV=2
364	TRUE	Q9H7D0|DOCK5_HUMAN	6.6	5.29	8	8	Carbamidomethylation	2737.4	2368.67	3800.23	3765.71	2819.26	3585.03	1600.17	668.248	1.03:0.89:1.42:1.41:1.06:1.34:0.60:0.25	3168	2168.18	1.19:0.81	215309	Dedicator of cytokinesis protein 5 OS=Homo sapiens OX=9606 GN=DOCK5 PE=1 SV=3
892	TRUE	Q92896|GSLG1_HUMAN	8.76	3.73	4	4	Oxidation (M)	2512.28	2228.55	867.586	697.877	5231.16	1893.45	1786.54	3379.04	1.08:0.96:0.37:0.30:2.25:0.81:0.77:1.45	1576.57	3072.55	0.68:1.32	134552	Golgi apparatus protein 1 OS=Homo sapiens OX=9606 GN=GLG1 PE=1 SV=2
583	TRUE	Q9NZW5|MPP6_HUMAN	0.65	20.37	8	8		4007.79	4091.96	523.027	648.262	2539.16	533.526	1687.64	1514.51	2.06:2.11:0.27:0.33:1.31:0.27:0.87:0.78	2317.76	1608.92	1.18:0.82	61117	MAGUK p55 subfamily member 6 OS=Homo sapiens OX=9606 GN=MPP6 PE=1 SV=2
194	TRUE	Q9NXE4|NSMA3_HUMAN	7.57	21.13	15	15	Acetylation (N-term); Carbamidomethylation; Oxidation (M)	10165.5	47845.3	7774.65	7935.14	44214.8	15597.7	26413.3	32993.6	0.42:1.98:0.32:0.33:1.83:0.65:1.10:1.37	18430.1	29804.8	0.76:1.24	97810	Sphingomyelin phosphodiesterase 4 OS=Homo sapiens OX=9606 GN=SMPD4 PE=1 SV=3
939	TRUE	Q10589|BST2_HUMAN	32.04	18.33	3	3		3411.61	4072.15	647.249	1381	46306.7	26102.4	31808.8	33088	0.19:0.22:0.04:0.08:2.52:1.42:1.73:1.80	2378	34326.5	0.13:1.87	19769	Bone marrow stromal antigen 2 OS=Homo sapiens OX=9606 GN=BST2 PE=1 SV=1
323	TRUE	Q9BQ39|DDX50_HUMAN	1.88	20.35	11	11	Oxidation (M)	30919.8	26568.8	5378.11	5327.53	9442.26	6631.23	12422.6	11463.6	2.29:1.97:0.40:0.39:0.70:0.49:0.92:0.85	17048.5	9989.91	1.26:0.74	82565	ATP-dependent RNA helicase DDX50 OS=Homo sapiens OX=9606 GN=DDX50 PE=1 SV=1
79	TRUE	Q07157|ZO1_HUMAN	3.06	26.09	31	31	Oxidation (M)	9719.14	10335	1758.08	2630.48	6413.62	3987.18	8182.63	9204.25	1.49:1.58:0.27:0.40:0.98:0.61:1.25:1.41	6110.67	6946.92	0.94:1.06	195459	Tight junction protein ZO-1 OS=Homo sapiens OX=9606 GN=TJP1 PE=1 SV=3
484	TRUE	O15530|PDPK1_HUMAN	8.9	18.88	8	8		1747.22	2409.84	1117.3	1182.31	2770.44	1286.57	3826.04	3550.8	0.78:1.08:0.50:0.53:1.24:0.58:1.71:1.59	1614.17	2858.46	0.72:1.28	63152	3-phosphoinositide-dependent protein kinase 1 OS=Homo sapiens OX=9606 GN=PDPK1 PE=1 SV=1
113	TRUE	Q9P273|TEN3_HUMAN	10.8	16.9	30	29	Carbamidomethylation; Oxidation (M)	14632.1	15281.6	3534.37	3586.65	4172.57	2630.54	1951.75	3288.07	2.39:2.49:0.58:0.58:0.68:0.43:0.32:0.54	9258.69	3010.73	1.51:0.49	300950	Teneurin-3 OS=Homo sapiens OX=9606 GN=TENM3 PE=1 SV=3
675	TRUE	Q96JI7|SPTCS_HUMAN	3.91	3.4	6	6		1382.35	1282.19	2494.77	460.26	784.31	1625.71	789.421	402.527	1.20:1.11:2.16:0.40:0.68:1.41:0.68:0.35	1404.89	900.492	1.22:0.78	278868	Spatacsin OS=Homo sapiens OX=9606 GN=SPG11 PE=1 SV=3
464	TRUE	Q05682|CALD1_HUMAN	6.91	13.11	9	9		3605.37	4893.04	618.921	632.733	954.746	702.518	604.229	691.174	2.27:3.08:0.39:0.40:0.60:0.44:0.38:0.44	2437.51	738.167	1.54:0.46	93231	Caldesmon OS=Homo sapiens OX=9606 GN=CALD1 PE=1 SV=3
239	TRUE	Q16625|OCLN_HUMAN	6.51	35.82	16	16	Oxidation (M)	30314.1	29741.5	12391.7	12784.8	30639.3	22062.8	32053.6	27710	1.23:1.20:0.50:0.52:1.24:0.89:1.30:1.12	21476.8	28116.4	0.87:1.13	59144	Occludin OS=Homo sapiens OX=9606 GN=OCLN PE=1 SV=1
686	TRUE	P23469|PTPRE_HUMAN	5.65	8.14	5	5		1563.99	1550.9	254.408	289.745	1693.06	561.226	1518.9	2075.3	1.32:1.30:0.21:0.24:1.42:0.47:1.28:1.75	1144.84	1462.12	0.88:1.12	80642	Receptor-type tyrosine-protein phosphatase epsilon OS=Homo sapiens OX=9606 GN=PTPRE PE=1 SV=1
310	TRUE	O60488|ACSL4_HUMAN	5.03	13.5	10	7	Oxidation (M)	6162.77	6120.73	1317.23	605.571	1812.38	1250.35	852.084	1115.78	2.56:2.55:0.55:0.25:0.75:0.52:0.35:0.46	3902.31	1257.65	1.51:0.49	79188	Long-chain-fatty-acid--CoA ligase 4 OS=Homo sapiens OX=9606 GN=ACSL4 PE=1 SV=2
676	TRUE	O95716|RAB3D_HUMAN	18.04	22.83	4	3	Oxidation (M)	4525.17	4037.83	2461.91	3394.11	6030.35	4751.26	7941.59	8921.45	0.86:0.77:0.47:0.65:1.15:0.90:1.51:1.70	3604.75	6911.16	0.69:1.31	24267	Ras-related protein Rab-3D OS=Homo sapiens OX=9606 GN=RAB3D PE=1 SV=1
451	TRUE	Q07864|DPOE1_HUMAN	21.86	4.55	9	9	Acetylation (N-term); Oxidation (M)	7937.27	6732.4	12181.3	10422.3	16736.5	15173.3	14924.3	16592.1	0.63:0.53:0.97:0.83:1.33:1.21:1.19:1.32	9552.14	15856.6	0.75:1.25	261518	DNA polymerase epsilon catalytic subunit A OS=Homo sapiens OX=9606 GN=POLE PE=1 SV=5
65	TRUE	Q9UMD9|COHA1_HUMAN	15.69	21.38	34	34	Carbamidomethylation; Oxidation (M)	129919	114952	51415.6	43061.6	224479	158995	157307	174270	0.99:0.87:0.39:0.33:1.70:1.21:1.19:1.32	84837.1	178763	0.64:1.36	150419	Collagen alpha-1(XVII) chain OS=Homo sapiens OX=9606 GN=COL17A1 PE=1 SV=3
504	TRUE	Q5VZK9|CARL1_HUMAN	13.16	6.93	6	6		429.349	746.818	126.957	133.481	825.585	960.543	811.302	685.483	0.73:1.27:0.22:0.23:1.40:1.63:1.38:1.16	581.076	820.728	0.83:1.17	151557	F-actin-uncapping protein LRRC16A OS=Homo sapiens OX=9606 GN=CARMIL1 PE=1 SV=1
72	TRUE	P11021|BIP_HUMAN	1.92	47.4	36	32	Oxidation (M)	98200.9	99290	44557	42229.5	84414.6	60469.8	73870.8	79051	1.35:1.36:0.61:0.58:1.16:0.83:1.02:1.09	71069.4	74451.6	0.98:1.02	72333	Endoplasmic reticulum chaperone BiP OS=Homo sapiens OX=9606 GN=HSPA5 PE=1 SV=2
880	TRUE	Q9HBI1|PARVB_HUMAN	2.01	10.99	4	3		1897.67	1728.25	105.105	226.308	434.147	119.112	464.16	620.923	2.71:2.47:0.15:0.32:0.62:0.17:0.66:0.89	1473.37	476.839	1.51:0.49	41714	Beta-parvin OS=Homo sapiens OX=9606 GN=PARVB PE=1 SV=1
439	TRUE	P11274|BCR_HUMAN	0.65	7	9	8	Oxidation (M)	3455.32	3086.59	796.26	807.813	1869.8	1396.34	1995.65	1782.98	1.82:1.63:0.42:0.43:0.98:0.74:1.05:0.94	2036.5	1761.19	1.07:0.93	142819	Breakpoint cluster region protein OS=Homo sapiens OX=9606 GN=BCR PE=1 SV=2
565	TRUE	Q9Y4F1|FARP1_HUMAN	15.41	4.5	4	4		3574.79	4071.29	1134.31	1227.1	9100.5	4286.46	5832.87	6414.73	0.80:0.91:0.25:0.28:2.04:0.96:1.31:1.44	2501.87	6408.64	0.56:1.44	118633	FERM, ARHGEF and pleckstrin domain-containing protein 1 OS=Homo sapiens OX=9606 GN=FARP1 PE=1 SV=1
1071	TRUE	P14384|CBPM_HUMAN	16.6	6.55	2	2		669.723	232.807	326.187	247.954	1805.89	883.282	755.537	632.876	0.96:0.34:0.47:0.36:2.60:1.27:1.09:0.91	369.168	1019.4	0.53:1.47	50514	Carboxypeptidase M OS=Homo sapiens OX=9606 GN=CPM PE=1 SV=2
353	TRUE	P18206|VINC_HUMAN	11.87	8.02	6	6	Oxidation (M)	466.262	740.737	276.332	333.99	821.301	453.803	1359.59	1230.16	0.66:1.04:0.39:0.47:1.16:0.64:1.91:1.73	479.48	1040.17	0.63:1.37	123799	Vinculin OS=Homo sapiens OX=9606 GN=VCL PE=1 SV=4
1230	TRUE	Q96F46|I17RA_HUMAN	4.03	2.66	2	2		609.259	392.635	135.176	105.3	660.871	163.358	451	463.14	1.64:1.05:0.36:0.28:1.77:0.44:1.21:1.24	382.758	569.745	0.80:1.20	96122	Interleukin-17 receptor A OS=Homo sapiens OX=9606 GN=IL17RA PE=1 SV=2
5	TRUE	P04264|K2C1_HUMAN	4.75	59.63	58	47	Acetylation (N-term); Carbamidomethylation; Oxidation (M)	396023	386039	318917	316271	362955	271792	595813	641732	0.96:0.94:0.78:0.77:0.88:0.66:1.45:1.56	354312	468073	0.86:1.14	66039	Keratin, type II cytoskeletal 1 OS=Homo sapiens OX=9606 GN=KRT1 PE=1 SV=6
846	TRUE	Q9Y5X3|SNX5_HUMAN	0.84	14.36	5	5	Acetylation (N-term); Oxidation (M)	1489.08	1679.98	959.121	917.524	1456.47	760.605	1145.53	1420.8	1.21:1.37:0.78:0.75:1.19:0.62:0.93:1.16	1261.43	1195.85	1.03:0.97	46816	Sorting nexin-5 OS=Homo sapiens OX=9606 GN=SNX5 PE=1 SV=1
388	TRUE	P52735|VAV2_HUMAN	1.36	12.3	9	9		6304.7	6567.49	844.435	1095.94	3197.68	2983.13	3538.53	2524.61	1.86:1.94:0.25:0.32:0.95:0.88:1.05:0.75	3926.61	3060.99	1.12:0.88	101289	Guanine nucleotide exchange factor VAV2 OS=Homo sapiens OX=9606 GN=VAV2 PE=1 SV=2
107	TRUE	O15294|OGT1_HUMAN	0.93	27.72	25	25	Acetylation (N-term); Oxidation (M)	20637.1	20552	2767.82	1968.08	11452.7	5194.94	7767.68	9725.54	2.06:2.05:0.28:0.20:1.14:0.52:0.78:0.97	11565.7	8576.16	1.15:0.85	116925	UDP-N-acetylglucosamine--peptide N-acetylglucosaminyltransferase 110 kDa subunit OS=Homo sapiens OX=9606 GN=OGT PE=1 SV=3
1191	TRUE	O75935|DCTN3_HUMAN	2.23	10.75	2	2		623.867	330.252	166.102	470.601	302.199	400.809	139.014	409.265	1.76:0.93:0.47:1.32:0.85:1.13:0.39:1.15	631.676	404.775	1.22:0.78	21119	Dynactin subunit 3 OS=Homo sapiens OX=9606 GN=DCTN3 PE=1 SV=1
424	TRUE	O75955|FLOT1_HUMAN	5.25	26.93	9	9	Oxidation (M)	822.523	1572.83	3528.34	3412.05	3754.56	5970.74	1705.1	2951.28	0.28:0.53:1.19:1.15:1.27:2.01:0.58:1.00	2333.94	3595.42	0.79:1.21	47355	Flotillin-1 OS=Homo sapiens OX=9606 GN=FLOT1 PE=1 SV=3
532	TRUE	P54278|PMS2_HUMAN	0.75	11.48	6	6	Oxidation (M)	2536.54	2715.27	632.247	645.872	1697.31	961.688	1397.66	1763.57	1.64:1.76:0.41:0.42:1.10:0.62:0.91:1.14	1632.48	1455.06	1.06:0.94	95797	Mismatch repair endonuclease PMS2 OS=Homo sapiens OX=9606 GN=PMS2 PE=1 SV=2
1261	TRUE	Q96B97|SH3K1_HUMAN	22.36	3.61	2	2		1249.96	1051.53	4683.98	426.239	10048.4	12004.1	12018.9	8133.41	0.20:0.17:0.76:0.07:1.62:1.94:1.94:1.31	1852.93	10551.2	0.30:1.70	73126	SH3 domain-containing kinase-binding protein 1 OS=Homo sapiens OX=9606 GN=SH3KBP1 PE=1 SV=2
691	TRUE	O00400|ACATN_HUMAN	2.52	6.74	3	3		4717.32	4478.65	684.999	717.587	886.953	1320.18	1645.88	1357.89	2.39:2.27:0.35:0.36:0.45:0.67:0.83:0.69	2649.64	1302.73	1.34:0.66	60909	Acetyl-coenzyme A transporter 1 OS=Homo sapiens OX=9606 GN=SLC33A1 PE=1 SV=1
11	TRUE	Q01082|SPTB2_HUMAN	7.89	44.84	88	80	Acetylation (N-term); Carbamidomethylation; Oxidation (M)	28281.6	28564.4	11695.7	12475	12953.8	3925.92	13501	13890.6	1.81:1.82:0.75:0.80:0.83:0.25:0.86:0.89	20435.9	11067.8	1.30:0.70	274609	Spectrin beta chain, non-erythrocytic 1 OS=Homo sapiens OX=9606 GN=SPTBN1 PE=1 SV=2
622	TRUE	Q96CW1|AP2M1_HUMAN	3.88	13.79	5	5	Oxidation (M)	8486.23	9080.07	568.096	1161.93	5223.25	2840.26	6713.76	6837.69	1.66:1.78:0.11:0.23:1.02:0.56:1.31:1.34	4824.08	5403.74	0.94:1.06	49655	AP-2 complex subunit mu OS=Homo sapiens OX=9606 GN=AP2M1 PE=1 SV=2
227	TRUE	P50281|MMP14_HUMAN	0.9	24.23	14	14	Carbamidomethylation; Oxidation (M)	34614.7	32881.7	9748.8	10259.6	23426.3	17477.1	14901.1	12889.8	1.77:1.68:0.50:0.53:1.20:0.90:0.76:0.66	21876.2	17173.6	1.12:0.88	65894	Matrix metalloproteinase-14 OS=Homo sapiens OX=9606 GN=MMP14 PE=1 SV=3
487	TRUE	Q04721|NOTC2_HUMAN	1.53	3.32	8	6	Oxidation (M)	2633.03	2052.07	264.355	257.785	1519.52	1234.12	461.73	1282.73	2.17:1.69:0.22:0.21:1.25:1.02:0.38:1.06	1624.77	1124.52	1.18:0.82	265405	Neurogenic locus notch homolog protein 2 OS=Homo sapiens OX=9606 GN=NOTCH2 PE=1 SV=3
526	TRUE	Q96EY1|DNJA3_HUMAN	4.14	26.67	9	9	Oxidation (M)	3698.68	4691.87	1434.29	2024.86	4517.98	2639.9	3195.14	4020.81	1.13:1.43:0.44:0.62:1.38:0.81:0.97:1.23	2962.42	3593.46	0.90:1.10	52489	DnaJ homolog subfamily A member 3, mitochondrial OS=Homo sapiens OX=9606 GN=DNAJA3 PE=1 SV=2
862	TRUE	Q16512|PKN1_HUMAN	3.35	4.25	4	3	Oxidation (M)	1137.09	957.787	619.526	405.06	772.807	377.851	499.592	755.794	1.65:1.39:0.90:0.59:1.12:0.55:0.72:1.09	1140.9	664.751	1.26:0.74	103932	Serine/threonine-protein kinase N1 OS=Homo sapiens OX=9606 GN=PKN1 PE=1 SV=2
537	TRUE	P48730|KC1D_HUMAN	1.91	18.55	7	7	Oxidation (M)	6671.67	7122.33	6352.26	5973.69	6736.76	12202.9	5530.85	5709.03	0.95:1.01:0.90:0.85:0.96:1.73:0.79:0.81	6529.99	7544.89	0.93:1.07	47330	Casein kinase I isoform delta OS=Homo sapiens OX=9606 GN=CSNK1D PE=1 SV=2
112	TRUE	Q13332|PTPRS_HUMAN	21.01	12.83	27	15	Oxidation (M)	1928.06	1699.71	1975.71	1790.69	7680.38	2588.78	8452.57	11569.7	0.41:0.36:0.42:0.38:1.63:0.55:1.79:2.46	1848.54	7572.86	0.39:1.61	217041	Receptor-type tyrosine-protein phosphatase S OS=Homo sapiens OX=9606 GN=PTPRS PE=1 SV=3
767	TRUE	O60941|DTNB_HUMAN	1.02	11.96	5	5	Oxidation (M)	2969.02	3296.5	3304.11	450.472	2153.41	1151.82	1911.18	1748.78	1.40:1.55:1.56:0.21:1.01:0.54:0.90:0.82	2505.02	1741.3	1.18:0.82	71356	Dystrobrevin beta OS=Homo sapiens OX=9606 GN=DTNB PE=1 SV=1
825	TRUE	Q96NW4|ANR27_HUMAN	3.08	3.52	3	3		975.662	1174.12	685.287	578.717	4817.57	2921.83	340.926	626.526	0.64:0.77:0.45:0.38:3.18:1.93:0.23:0.41	1155.83	2291.2	0.67:1.33	116984	Ankyrin repeat domain-containing protein 27 OS=Homo sapiens OX=9606 GN=ANKRD27 PE=1 SV=2
829	TRUE	P51636|CAV2_HUMAN	9.05	37.65	4	4	Oxidation (M)	12410	11500.2	2336.74	4547.9	14210.7	9750.56	13432.6	15373.2	1.19:1.10:0.22:0.44:1.36:0.93:1.29:1.47	7879.35	13191.8	0.75:1.25	18291	Caveolin-2 OS=Homo sapiens OX=9606 GN=CAV2 PE=1 SV=2
838	TRUE	P25054|APC_HUMAN	2.24	1.13	2	2		1387.16	1480.55	220.751	201.668	851.792	156.43	309.101	508.92	2.17:2.31:0.35:0.32:1.33:0.24:0.48:0.80	954.46	486.084	1.33:0.67	311646	Adenomatous polyposis coli protein OS=Homo sapiens OX=9606 GN=APC PE=1 SV=2
44	TRUE	P12814|ACTN1_HUMAN	5.6	45.52	44	34	Carbamidomethylation; Oxidation (M)	87454.1	87239.1	34605.9	34726.1	42540.3	36913.6	37733.6	42455.3	1.73:1.73:0.69:0.69:0.84:0.73:0.75:0.84	61006.3	39910.7	1.21:0.79	103058	Alpha-actinin-1 OS=Homo sapiens OX=9606 GN=ACTN1 PE=1 SV=2
313	TRUE	Q13492|PICAL_HUMAN	1.84	26.84	13	13	Oxidation (M)	13496.6	14358.7	1596.58	1759.05	7078.89	2363.59	12103.8	10305.3	1.71:1.82:0.20:0.22:0.90:0.30:1.54:1.31	7802.72	7962.89	0.99:1.01	70755	Phosphatidylinositol-binding clathrin assembly protein OS=Homo sapiens OX=9606 GN=PICALM PE=1 SV=2
950	TRUE	Q9Y2J4|AMOL2_HUMAN	4.29	3.34	2	2		126.152	145.804	0	0	284.742	103.166	174.818	464.244	0.78:0.90:0.00:0.00:1.75:0.64:1.08:2.86	135.978	372.997	0.53:1.47	85764	Angiomotin-like protein 2 OS=Homo sapiens OX=9606 GN=AMOTL2 PE=1 SV=3
230	TRUE	P30153|2AAA_HUMAN	2.22	33.96	15	15	Oxidation (M)	20003.4	19012.5	2439.16	6024.98	15159.2	7653.65	12875.9	11970.8	1.68:1.60:0.21:0.51:1.27:0.64:1.08:1.01	11870	11914.9	1.00:1.00	65309	Serine/threonine-protein phosphatase 2A 65 kDa regulatory subunit A alpha isoform OS=Homo sapiens OX=9606 GN=PPP2R1A PE=1 SV=4
406	TRUE	P61204|ARF3_HUMAN	24.55	31.49	7	4	Oxidation (M)	34557.4	26874.6	25169.8	24438.1	57881.2	37289.6	51134.3	57120.6	0.88:0.68:0.64:0.62:1.47:0.95:1.30:1.45	27760	50856.4	0.71:1.29	20601	ADP-ribosylation factor 3 OS=Homo sapiens OX=9606 GN=ARF3 PE=1 SV=2
881	TRUE	O95810|CAVN2_HUMAN	21.26	7.29	2	2	Oxidation (M)	1462.14	1551.67	820.78	829.908	4426.81	1856.29	4989.58	6822.62	0.51:0.55:0.29:0.29:1.56:0.65:1.75:2.40	1166.12	4523.83	0.41:1.59	47173	Caveolae-associated protein 2 OS=Homo sapiens OX=9606 GN=CAVIN2 PE=1 SV=3
257	TRUE	P23470|PTPRG_HUMAN	22.86	14.46	15	15		11396.4	11626.9	3575.4	3685.19	1446.35	226.474	864.844	857.958	2.71:2.76:0.85:0.88:0.34:0.05:0.21:0.20	7570.98	913.459	1.78:0.22	162003	Receptor-type tyrosine-protein phosphatase gamma OS=Homo sapiens OX=9606 GN=PTPRG PE=1 SV=4
125	TRUE	P50851|LRBA_HUMAN	3.25	10.58	24	24	Carbamidomethylation; Oxidation (M)	4259.68	4133.08	3290.89	3236.55	5665.23	2358.61	3462.02	12412.5	0.88:0.85:0.68:0.67:1.17:0.49:0.71:2.56	3730.05	5974.59	0.77:1.23	319108	Lipopolysaccharide-responsive and beige-like anchor protein OS=Homo sapiens OX=9606 GN=LRBA PE=1 SV=4
166	TRUE	P54760|EPHB4_HUMAN	0.05	17.33	19	13	Oxidation (M)	9926.32	9057.88	2203.99	2738.44	5721.58	2948.56	4959.17	6319.89	1.81:1.65:0.40:0.50:1.04:0.54:0.90:1.15	5981.66	4987.3	1.09:0.91	108270	Ephrin type-B receptor 4 OS=Homo sapiens OX=9606 GN=EPHB4 PE=1 SV=2
893	TRUE	Q9BRQ8|FSP1_HUMAN	12.23	13.94	4	4		1007.32	1120.88	447.626	395.845	2043.44	945.431	1143.31	1926.24	0.89:0.99:0.40:0.35:1.81:0.84:1.01:1.71	742.917	1514.61	0.66:1.34	40527	Ferroptosis suppressor protein 1 OS=Homo sapiens OX=9606 GN=AIFM2 PE=1 SV=1
252	TRUE	P55290|CAD13_HUMAN	31.8	26.09	12	12	Oxidation (M)	61955.3	60463.9	14769.5	9741.39	458.618	228.248	835.887	1190.33	3.31:3.23:0.79:0.52:0.02:0.02:0.04:0.06	36732.5	812.209	1.96:0.04	78287	Cadherin-13 OS=Homo sapiens OX=9606 GN=CDH13 PE=1 SV=1
440	TRUE	P51149|RAB7A_HUMAN	10.27	60.39	10	10	Oxidation (M)	15426.3	14764.3	6574.78	6491.09	15562.6	12866.9	18548.4	22068.8	1.10:1.05:0.47:0.46:1.11:0.92:1.32:1.57	10814.1	17261.7	0.77:1.23	23490	Ras-related protein Rab-7a OS=Homo sapiens OX=9606 GN=RAB7A PE=1 SV=1
731	TRUE	Q9UBT7|CTNL1_HUMAN	0.12	6.13	3	3	Acetylation (N-term)	38237	25151.7	10759.8	11228.4	31006.2	34919.5	14266	8045.64	1.76:1.16:0.50:0.52:1.43:1.61:0.66:0.37	21515.7	22091.6	0.99:1.01	81896	Alpha-catulin OS=Homo sapiens OX=9606 GN=CTNNAL1 PE=1 SV=2
1259	TRUE	Q8N1I0|DOCK4_HUMAN	14.79	1.37	2	2		382.572	675.506	0	0	88.8102	0	0	55.2715	2.55:4.50:0.00:0.00:0.59:0.00:0.00:0.37	529.039	72.0409	1.76:0.24	225206	Dedicator of cytokinesis protein 4 OS=Homo sapiens OX=9606 GN=DOCK4 PE=1 SV=3
71	TRUE	Q9NZB2|F120A_HUMAN	0.31	41.14	33	33	Carbamidomethylation; Oxidation (M)	46891.7	47160.1	10947.4	9934.02	25463.9	15032.6	20815.9	25580.5	1.86:1.87:0.43:0.39:1.01:0.60:0.83:1.01	28733.3	21723.2	1.14:0.86	121888	Constitutive coactivator of PPAR-gamma-like protein 1 OS=Homo sapiens OX=9606 GN=FAM120A PE=1 SV=2
244	TRUE	Q12959|DLG1_HUMAN	5.12	25.22	16	16	Carbamidomethylation	4644.67	2887.74	698.866	716.033	3289.78	1679.51	2889.79	4350.84	1.76:1.09:0.26:0.27:1.24:0.64:1.09:1.65	2475.02	3052.48	0.90:1.10	100455	Disks large homolog 1 OS=Homo sapiens OX=9606 GN=DLG1 PE=1 SV=2
148	TRUE	P16070|CD44_HUMAN	4.37	19	21	21	Carbamidomethylation; Oxidation (M)	922710	911266	391801	406048	613391	500404	401156	387643	1.63:1.61:0.69:0.72:1.08:0.88:0.71:0.68	657956	475649	1.16:0.84	81538	CD44 antigen OS=Homo sapiens OX=9606 GN=CD44 PE=1 SV=3
885	TRUE	Q9NXR1|NDE1_HUMAN	9.92	12.24	3	3		401.169	442.59	213.341	101.476	893.733	376.098	357.713	806.039	0.89:0.99:0.48:0.23:1.99:0.84:0.80:1.80	480.77	645.163	0.85:1.15	37721	Nuclear distribution protein nudE homolog 1 OS=Homo sapiens OX=9606 GN=NDE1 PE=1 SV=3
28	TRUE	Q14517|FAT1_HUMAN	0.7	17.22	59	59	Oxidation (M)	15301.2	13845.6	2196.98	1897.81	5671.41	9230.24	4621.52	5783.63	2.09:1.89:0.30:0.26:0.77:1.26:0.63:0.79	8310.41	6326.7	1.14:0.86	506273	Protocadherin Fat 1 OS=Homo sapiens OX=9606 GN=FAT1 PE=1 SV=2
411	TRUE	O75326|SEM7A_HUMAN	6.75	17.72	7	7	Oxidation (M)	23354.7	23269.1	723.678	2085.53	1016.54	3452.86	1352.85	979.707	3.32:3.31:0.10:0.30:0.14:0.49:0.19:0.14	12534.7	1739.55	1.76:0.24	74824	Semaphorin-7A OS=Homo sapiens OX=9606 GN=SEMA7A PE=1 SV=1
480	TRUE	Q9H6S3|ES8L2_HUMAN	22.26	21.68	9	9	Oxidation (M)	1693.53	2099.39	673.959	1088.8	4744.58	3261.28	3366.16	4370.85	0.64:0.79:0.25:0.41:1.78:1.22:1.26:1.64	1388.92	3935.72	0.52:1.48	80621	Epidermal growth factor receptor kinase substrate 8-like protein 2 OS=Homo sapiens OX=9606 GN=EPS8L2 PE=1 SV=2
360	TRUE	Q86X29|LSR_HUMAN	7.67	25.58	11	11	Oxidation (M)	15994.9	16709.8	3406.23	3914.33	19417.2	11416.4	15076.5	17359.7	1.24:1.29:0.26:0.30:1.50:0.88:1.17:1.34	10006.3	15817.5	0.77:1.23	71439	Lipolysis-stimulated lipoprotein receptor OS=Homo sapiens OX=9606 GN=LSR PE=1 SV=4
956	TRUE	O14939|PLD2_HUMAN	0.74	5.04	3	3		1513.51	1941.96	267.821	269.724	833.023	523.049	696.697	1109.29	1.69:2.17:0.30:0.30:0.93:0.58:0.78:1.24	1100.13	903.791	1.10:0.90	105987	Phospholipase D2 OS=Homo sapiens OX=9606 GN=PLD2 PE=1 SV=2
382	TRUE	P19022|CADH2_HUMAN	14.37	16.67	12	11	Oxidation (M)	5911.76	5464.55	1578.65	1643.06	358.551	2598.33	291.932	357.672	2.60:2.40:0.69:0.72:0.16:1.14:0.13:0.16	4276.34	901.622	1.65:0.35	99809	Cadherin-2 OS=Homo sapiens OX=9606 GN=CDH2 PE=1 SV=4
936	TRUE	O60669|MOT2_HUMAN	6.99	6.69	4	4		9379.79	9546.95	4671.91	4450.16	9934.82	5629.02	12384.3	15155.2	1.05:1.07:0.53:0.50:1.12:0.63:1.39:1.70	7012.2	10775.8	0.79:1.21	52200	Monocarboxylate transporter 2 OS=Homo sapiens OX=9606 GN=SLC16A7 PE=1 SV=2
765	TRUE	Q96SB3|NEB2_HUMAN	1.76	6.73	4	4		1012.5	1012.8	78.7882	0	914.899	676.58	412.583	529.739	1.75:1.75:0.14:0.00:1.58:1.17:0.71:0.91	876.552	692.953	1.12:0.88	89334	Neurabin-2 OS=Homo sapiens OX=9606 GN=PPP1R9B PE=1 SV=3
172	TRUE	P54753|EPHB3_HUMAN	37.75	20.34	21	13	Oxidation (M)	2676.74	3145.21	1732.3	1515.85	16018.1	9629.12	16508.2	20075.4	0.30:0.35:0.19:0.17:1.80:1.08:1.85:2.25	2267.53	15557.7	0.25:1.75	110330	Ephrin type-B receptor 3 OS=Homo sapiens OX=9606 GN=EPHB3 PE=1 SV=2
1260	TRUE	O75712|CXB3_HUMAN	8.8	9.63	2	2		3031.98	3262.4	271.289	540.513	4863.23	2906.26	2454.08	3672.49	1.15:1.24:0.10:0.21:1.85:1.11:0.93:1.40	1776.55	3474.01	0.68:1.32	30818	Gap junction beta-3 protein OS=Homo sapiens OX=9606 GN=GJB3 PE=1 SV=1
280	TRUE	Q9NZU0|FLRT3_HUMAN	8.88	30.2	14	14	Oxidation (M)	19523	18022.5	3406.43	3410.11	5249.02	2720.27	2409.14	3037.85	2.70:2.50:0.47:0.47:0.73:0.38:0.33:0.42	11289.7	3434.93	1.53:0.47	73004	Leucine-rich repeat transmembrane protein FLRT3 OS=Homo sapiens OX=9606 GN=FLRT3 PE=1 SV=1
735	TRUE	Q7L5N7|PCAT2_HUMAN	0.31	11.58	5	5		5864.43	5679.34	647.334	898.455	2702.24	992.522	2158.71	2667.94	2.17:2.10:0.24:0.33:1.00:0.37:0.80:0.99	3272.39	2130.35	1.21:0.79	60208	Lysophosphatidylcholine acyltransferase 2 OS=Homo sapiens OX=9606 GN=LPCAT2 PE=1 SV=1
266	TRUE	Q15582|BGH3_HUMAN	13.11	31.63	15	15	Oxidation (M)	7971.92	7689.65	2003.71	2857.68	12562.2	6529.66	14444.8	15641.6	0.91:0.88:0.23:0.33:1.44:0.75:1.66:1.80	5130.74	12294.6	0.59:1.41	74681	Transforming growth factor-beta-induced protein ig-h3 OS=Homo sapiens OX=9606 GN=TGFBI PE=1 SV=1
168	TRUE	P21589|5NTD_HUMAN	20.2	40.07	20	20	Oxidation (M)	67777.4	64208.8	17680.2	14431.7	8343.92	4215.3	6758.73	6758.35	2.85:2.70:0.74:0.61:0.35:0.18:0.28:0.28	41496.8	6723.96	1.72:0.28	63368	5'-nucleotidase OS=Homo sapiens OX=9606 GN=NT5E PE=1 SV=1
1207	TRUE	Q13488|VPP3_HUMAN	3.86	3.25	2	2		839.883	986.946	50.3805	202.625	747.11	393.698	559.206	628.25	1.52:1.79:0.09:0.37:1.36:0.71:1.01:1.14	570.192	582.066	0.99:1.01	92968	V-type proton ATPase 116 kDa subunit a3 OS=Homo sapiens OX=9606 GN=TCIRG1 PE=1 SV=3
430	TRUE	Q6ZNJ1|NBEL2_HUMAN	11.89	4.5	8	8	Carbamidomethylation; Oxidation (M)	2715.57	2672.08	649.681	0	967.834	100.78	357.092	377.434	2.77:2.73:0.66:0.00:0.99:0.10:0.36:0.39	2734.44	655.321	1.61:0.39	302517	Neurobeachin-like protein 2 OS=Homo sapiens OX=9606 GN=NBEAL2 PE=1 SV=2
621	TRUE	Q9BR76|COR1B_HUMAN	3.32	19.63	7	7	Carbamidomethylation; Oxidation (M)	2361.48	2927.44	584.235	1187.65	4984.09	1829.23	1662.2	1351.52	1.12:1.39:0.28:0.56:2.36:0.87:0.79:0.64	1765.2	2456.76	0.84:1.16	54235	Coronin-1B OS=Homo sapiens OX=9606 GN=CORO1B PE=1 SV=1
25	TRUE	P08195|4F2_HUMAN	14.11	60.32	77	77	Carbamidomethylation; Oxidation (M)	519839	556180	277143	277442	676321	497595	900824	915015	0.90:0.96:0.48:0.48:1.17:0.86:1.56:1.58	407651	747439	0.71:1.29	67994	4F2 cell-surface antigen heavy chain OS=Homo sapiens OX=9606 GN=SLC3A2 PE=1 SV=3
37	TRUE	P08727|K1C19_HUMAN	27.66	81	45	43	Oxidation (M)	169614	163034	77883.2	79796.1	388008	319983	500276	433739	0.64:0.61:0.29:0.30:1.46:1.20:1.88:1.63	122582	410502	0.46:1.54	44106	Keratin, type I cytoskeletal 19 OS=Homo sapiens OX=9606 GN=KRT19 PE=1 SV=4
897	TRUE	Q9H0U3|MAGT1_HUMAN	28.78	13.13	4	4	Oxidation (M)	4544.12	4032.87	4260.02	3725.66	2216.01	2116.2	2421.49	3082.69	1.38:1.22:1.29:1.13:0.67:0.64:0.73:0.93	4140.67	2459.1	1.25:0.75	38037	Magnesium transporter protein 1 OS=Homo sapiens OX=9606 GN=MAGT1 PE=1 SV=1
191	TRUE	O00443|P3C2A_HUMAN	2.65	12.04	17	17		3340.89	3992.91	1352.36	2274.78	1848.46	4317.58	1435.02	1440.48	1.34:1.60:0.54:0.91:0.74:1.73:0.57:0.58	3452.85	2260.38	1.21:0.79	190680	Phosphatidylinositol 4-phosphate 3-kinase C2 domain-containing subunit alpha OS=Homo sapiens OX=9606 GN=PIK3C2A PE=1 SV=2
594	TRUE	P18615|NELFE_HUMAN	6.21	17.37	5	5		1343.19	1095.51	395.753	288.907	1020.89	1590.86	1017.75	827.706	1.42:1.16:0.42:0.30:1.08:1.68:1.07:0.87	934.244	1114.3	0.91:1.09	43240	Negative elongation factor E OS=Homo sapiens OX=9606 GN=NELFE PE=1 SV=3
747	TRUE	P62070|RRAS2_HUMAN	4.37	18.63	4	3	Oxidation (M)	5830.45	5928.46	2673.09	2366.71	3850.29	3922.22	1034.11	2928.49	1.63:1.66:0.75:0.66:1.08:1.10:0.29:0.82	4199.68	3437.39	1.10:0.90	23400	Ras-related protein R-Ras2 OS=Homo sapiens OX=9606 GN=RRAS2 PE=1 SV=1
940	TRUE	Q16222|UAP1_HUMAN	2.4	7.47	3	3		1368.51	1511.2	249.774	255.659	790.038	344.077	310.629	430.183	2.08:2.30:0.38:0.39:1.20:0.52:0.47:0.65	1261	468.732	1.46:0.54	58769	UDP-N-acetylhexosamine pyrophosphorylase OS=Homo sapiens OX=9606 GN=UAP1 PE=1 SV=3
704	TRUE	P29353|SHC1_HUMAN	0.81	15.27	5	5	Oxidation (M)	1316.55	1566.62	1229.5	1951.84	1973.89	1714.26	1433.72	843.347	0.88:1.04:0.82:1.30:1.31:1.14:0.95:0.56	1516.13	1491.3	1.01:0.99	62822	SHC-transforming protein 1 OS=Homo sapiens OX=9606 GN=SHC1 PE=1 SV=4
142	TRUE	P07237|PDIA1_HUMAN	5.05	43.7	21	21	Oxidation (M)	28460.7	26182.5	9037.25	9924.87	30147.1	18348.7	19076.1	27279.9	1.35:1.24:0.43:0.47:1.43:0.87:0.91:1.30	18620.6	23713	0.88:1.12	57116	Protein disulfide-isomerase OS=Homo sapiens OX=9606 GN=P4HB PE=1 SV=3
175	TRUE	P52789|HXK2_HUMAN	4.09	23.88	17	17	Acetylation (N-term); Oxidation (M)	10471.2	10797.7	1746.14	1911.27	15461.3	4865.85	5669.87	7305.34	1.44:1.48:0.24:0.26:2.12:0.67:0.78:1.00	6231.57	8325.58	0.86:1.14	102380	Hexokinase-2 OS=Homo sapiens OX=9606 GN=HK2 PE=1 SV=2
701	TRUE	Q9P289|STK26_HUMAN	5.93	18.27	6	6		4354.74	5428.46	1302.83	2367.36	4848.86	3951.97	4398.61	4416.75	1.12:1.40:0.34:0.61:1.25:1.02:1.13:1.14	3363.35	4404.05	0.87:1.13	46529	Serine/threonine-protein kinase 26 OS=Homo sapiens OX=9606 GN=STK26 PE=1 SV=2
916	TRUE	Q9HCL2|GPAT1_HUMAN	10.12	4.71	3	3	Carbamidomethylation	5569.82	4184.05	6703.41	6084.02	10526.1	13296.5	6370.98	5968.33	0.76:0.57:0.91:0.83:1.43:1.81:0.87:0.81	5713.07	9171.77	0.77:1.23	93795	Glycerol-3-phosphate acyltransferase 1, mitochondrial OS=Homo sapiens OX=9606 GN=GPAM PE=1 SV=3
193	TRUE	Q14571|ITPR2_HUMAN	1.58	3.78	13	8	Oxidation (M)	12831.6	7986.53	3687.91	3372.77	6131.56	6537.72	4590.99	3955.47	2.09:1.30:0.60:0.55:1.00:1.07:0.75:0.64	7145.71	5303.93	1.15:0.85	308064	Inositol 1,4,5-trisphosphate receptor type 2 OS=Homo sapiens OX=9606 GN=ITPR2 PE=1 SV=2
180	TRUE	P35052|GPC1_HUMAN	11.9	39.96	19	19	Carbamidomethylation; Oxidation (M)	22512.4	24142.4	7598.08	6648.68	31325.1	21253.7	29998.9	36519.1	1.00:1.07:0.34:0.30:1.39:0.94:1.33:1.62	15225.4	29774.2	0.68:1.32	61680	Glypican-1 OS=Homo sapiens OX=9606 GN=GPC1 PE=1 SV=2
858	TRUE	P50552|VASP_HUMAN	1.91	12.89	4	4	Oxidation (M)	1382.93	1794.23	120.134	223.09	1104.27	550.577	637.931	649.25	1.71:2.22:0.15:0.28:1.37:0.68:0.79:0.80	959.082	759.19	1.12:0.88	39830	Vasodilator-stimulated phosphoprotein OS=Homo sapiens OX=9606 GN=VASP PE=1 SV=3
678	TRUE	P40818|UBP8_HUMAN	2.99	3.4	3	3	Oxidation (M)	2047.51	1967.4	424.746	413.959	736.846	612.781	635.667	676.561	2.18:2.09:0.45:0.44:0.78:0.65:0.68:0.72	1269.83	665.464	1.31:0.69	127523	Ubiquitin carboxyl-terminal hydrolase 8 OS=Homo sapiens OX=9606 GN=USP8 PE=1 SV=1
378	TRUE	P08754|GNAI3_HUMAN	8.55	16.1	8	4	Oxidation (M)	3703.97	3226.34	515.352	937.948	3468.31	4374.96	3377.64	3075.84	1.31:1.14:0.18:0.33:1.22:1.54:1.19:1.08	2151.26	3574.19	0.75:1.25	40532	Guanine nucleotide-binding protein G(i) subunit alpha OS=Homo sapiens OX=9606 GN=GNAI3 PE=1 SV=3
94	TRUE	P06576|ATPB_HUMAN	0.46	66.92	23	23	Oxidation (M)	71006.5	75913.4	18497.7	17526.1	35283.6	23303.7	38844.3	43660.2	1.75:1.87:0.46:0.43:0.87:0.58:0.96:1.08	45735.9	35272.9	1.13:0.87	56560	ATP synthase subunit beta, mitochondrial OS=Homo sapiens OX=9606 GN=ATP5F1B PE=1 SV=3
50	TRUE	P05023|AT1A1_HUMAN	2.31	27.66	42	25	Carbamidomethylation; Oxidation (M)	139427	156568	41432.3	53121.9	100840	55355.7	116839	194863	1.30:1.46:0.39:0.50:0.94:0.52:1.09:1.82	97637.3	116974	0.91:1.09	112896	Sodium/potassium-transporting ATPase subunit alpha-1 OS=Homo sapiens OX=9606 GN=ATP1A1 PE=1 SV=1
80	TRUE	P07900|HS90A_HUMAN	1.34	21.17	32	14	Carbamidomethylation; Oxidation (M)	49644	35475.1	11497.8	11958.2	23108.7	11679.7	20083.7	24905.1	2.11:1.51:0.49:0.51:0.98:0.50:0.85:1.06	27143.8	19944.3	1.15:0.85	84660	Heat shock protein HSP 90-alpha OS=Homo sapiens OX=9606 GN=HSP90AA1 PE=1 SV=5
664	TRUE	Q9Y487|VPP2_HUMAN	0.49	6.31	4	4		791.765	1294.79	472.969	2673.67	384.807	3617.08	867.239	1498.86	0.55:0.89:0.33:1.84:0.27:2.49:0.60:1.03	1308.3	1592	0.90:1.10	98082	V-type proton ATPase 116 kDa subunit a2 OS=Homo sapiens OX=9606 GN=ATP6V0A2 PE=1 SV=2
160	TRUE	P23743|DGKA_HUMAN	3.45	34.69	20	20	Carbamidomethylation; Oxidation (M)	8224.55	8303.5	3354.96	3418.22	6457.53	6239.86	6136.83	7327.88	1.33:1.34:0.54:0.55:1.04:1.01:0.99:1.19	5825.31	6540.52	0.94:1.06	82630	Diacylglycerol kinase alpha OS=Homo sapiens OX=9606 GN=DGKA PE=1 SV=3
615	TRUE	O14763|TR10B_HUMAN	7.91	18.18	6	6	Oxidation (M)	10318.3	10456.2	3339.03	3324.2	3847.23	1984.52	2833.19	4856.12	2.02:2.04:0.65:0.65:0.75:0.39:0.55:0.95	6859.42	3380.27	1.34:0.66	47878	Tumor necrosis factor receptor superfamily member 10B OS=Homo sapiens OX=9606 GN=TNFRSF10B PE=1 SV=2
339	TRUE	Q13033|STRN3_HUMAN	2.54	20.95	11	11	Carbamidomethylation	7445.6	7368.83	533.879	664.065	1784.24	1054.37	1662.61	973.508	2.77:2.74:0.20:0.25:0.66:0.39:0.62:0.36	4552.38	1423.38	1.52:0.48	87209	Striatin-3 OS=Homo sapiens OX=9606 GN=STRN3 PE=1 SV=3
680	TRUE	P0CG47|UBB_HUMAN	5.86	17.47	4	4		236990	243501	52837.1	54818.2	294498	193417	161961	172385	1.34:1.38:0.30:0.31:1.67:1.10:0.92:0.98	147036	205565	0.83:1.17	25762	Polyubiquitin-B OS=Homo sapiens OX=9606 GN=UBB PE=1 SV=1
890	TRUE	Q9UBC2|EP15R_HUMAN	10.24	5.56	3	3		481.215	546.991	0	0	324.536	0	146.84	281.648	2.16:2.46:0.00:0.00:1.46:0.00:0.66:1.26	514.103	286.912	1.28:0.72	94255	Epidermal growth factor receptor substrate 15-like 1 OS=Homo sapiens OX=9606 GN=EPS15L1 PE=1 SV=1
114	TRUE	O95714|HERC2_HUMAN	5.11	7.26	27	27	Oxidation (M)	142395	127547	205140	481615	220144	290609	62548.3	27037.9	0.73:0.66:1.05:2.47:1.13:1.49:0.32:0.14	239369	150085	1.23:0.77	527228	E3 ubiquitin-protein ligase HERC2 OS=Homo sapiens OX=9606 GN=HERC2 PE=1 SV=2
1100	TRUE	Q9BZM4|ULBP3_HUMAN	1.47	11.48	2	2	Oxidation (M)	838.892	834.182	1286.52	1363.05	384.298	2349.08	2102.61	263.807	0.71:0.71:1.09:1.16:0.33:1.99:1.79:0.22	1127.84	1307.06	0.93:1.07	27949	UL16-binding protein 3 OS=Homo sapiens OX=9606 GN=ULBP3 PE=1 SV=1
428	TRUE	Q96JJ7|TMX3_HUMAN	20.75	23.35	9	9	Oxidation (M)	2542.99	4351.15	2753.64	2713	796.428	1152.16	1705.48	1725.4	1.15:1.96:1.24:1.22:0.36:0.52:0.77:0.78	3090.19	1344.87	1.39:0.61	51872	Protein disulfide-isomerase TMX3 OS=Homo sapiens OX=9606 GN=TMX3 PE=1 SV=2
248	TRUE	O94905|ERLN2_HUMAN	4.33	39.53	12	12	Oxidation (M)	26623.4	25868.9	10222.1	10525.7	16139.4	11188.9	10767	12688.4	1.72:1.67:0.66:0.68:1.04:0.72:0.69:0.82	18310	12695.9	1.18:0.82	37840	Erlin-2 OS=Homo sapiens OX=9606 GN=ERLIN2 PE=1 SV=1
35	TRUE	Q6YHK3|CD109_HUMAN	5.6	46.85	54	54	Carbamidomethylation; Oxidation (M)	144023	153532	91774.6	89706.7	193478	149871	132407	113609	1.08:1.15:0.69:0.67:1.45:1.12:0.99:0.85	119759	147341	0.90:1.10	161689	CD109 antigen OS=Homo sapiens OX=9606 GN=CD109 PE=1 SV=2
262	TRUE	O00468|AGRIN_HUMAN	0.25	2.51	4	4		1393.55	999.871	1059.06	1171.65	2218.1	575.553	1031.63	1205.92	1.15:0.83:0.88:0.97:1.84:0.48:0.85:1.00	1156.03	1257.8	0.96:1.04	217320	Agrin OS=Homo sapiens OX=9606 GN=AGRN PE=1 SV=6
582	TRUE	Q9ULV4|COR1C_HUMAN	2.79	19.2	7	7	Carbamidomethylation	18046.5	19722.5	3745.67	3947.44	14954.4	9359.42	10269.4	13041.8	1.55:1.69:0.32:0.34:1.29:0.80:0.88:1.12	11365.5	11906.2	0.98:1.02	53249	Coronin-1C OS=Homo sapiens OX=9606 GN=CORO1C PE=1 SV=1
828	TRUE	P36543|VATE1_HUMAN	2.55	15.49	3	3	Oxidation (M)	2028.45	1492.37	275.627	518.905	1454.66	524.771	1257.82	1701.39	1.75:1.29:0.24:0.45:1.26:0.45:1.09:1.47	1078.84	1326.25	0.90:1.10	26145	V-type proton ATPase subunit E 1 OS=Homo sapiens OX=9606 GN=ATP6V1E1 PE=1 SV=1
134	TRUE	P30519|HMOX2_HUMAN	3.99	64.56	20	19	Acetylation (N-term); Carbamidomethylation; Oxidation (M)	90950.9	91116	19683.5	19278.7	78878	45172.1	67727.6	69634.1	1.51:1.51:0.33:0.32:1.31:0.75:1.12:1.15	55412	65427.1	0.92:1.08	36033	Heme oxygenase 2 OS=Homo sapiens OX=9606 GN=HMOX2 PE=1 SV=2
498	TRUE	P49585|PCY1A_HUMAN	8.05	27.52	7	7	Oxidation (M)	3358.77	3441.96	750.575	964.534	5051.43	3239.58	2206.52	4000.87	1.17:1.20:0.26:0.34:1.76:1.13:0.77:1.39	2128.96	3624.6	0.74:1.26	41731	Choline-phosphate cytidylyltransferase A OS=Homo sapiens OX=9606 GN=PCYT1A PE=1 SV=2
740	TRUE	Q8NB49|AT11C_HUMAN	3.44	5.65	5	5		1587.78	1601.88	960.154	863	489.037	1474.04	989.059	1171.49	1.39:1.40:0.84:0.76:0.43:1.29:0.87:1.03	1394.13	1030.91	1.15:0.85	129477	Phospholipid-transporting ATPase IG OS=Homo sapiens OX=9606 GN=ATP11C PE=1 SV=3
459	TRUE	Q13613|MTMR1_HUMAN	0.05	9.47	6	5	Oxidation (M)	3127.32	2734.62	783.994	940.098	1363.19	1184.34	2148.72	1858.94	1.77:1.55:0.44:0.53:0.77:0.67:1.22:1.05	1896.51	1638.8	1.07:0.93	74678	Myotubularin-related protein 1 OS=Homo sapiens OX=9606 GN=MTMR1 PE=1 SV=4
549	TRUE	Q7KZI7|MARK2_HUMAN	7.83	3.93	4	2		289.012	793.494	139.553	148.801	939.226	457.61	308.815	710.522	0.61:1.68:0.29:0.31:1.98:0.97:0.65:1.50	418.802	647.4	0.79:1.21	87911	Serine/threonine-protein kinase MARK2 OS=Homo sapiens OX=9606 GN=MARK2 PE=1 SV=2
56	TRUE	Q86UP2|KTN1_HUMAN	12.52	43.04	47	47	Oxidation (M)	16603.6	16483.6	5685.58	5726.25	18795.3	15477.3	26276.2	29161	0.99:0.98:0.34:0.34:1.12:0.92:1.57:1.74	11124.8	22427.5	0.66:1.34	156275	Kinectin OS=Homo sapiens OX=9606 GN=KTN1 PE=1 SV=1
774	TRUE	P26045|PTN3_HUMAN	2.9	7.12	5	5		1024.64	929.876	196.994	235.166	997.008	284.121	886.859	753.08	1.54:1.40:0.30:0.35:1.50:0.43:1.34:1.14	975.134	730.267	1.14:0.86	103990	Tyrosine-protein phosphatase non-receptor type 3 OS=Homo sapiens OX=9606 GN=PTPN3 PE=1 SV=2
567	TRUE	Q9UM47|NOTC3_HUMAN	5.48	2.02	5	3	Oxidation (M)	873.244	527.345	187.695	186.865	577.248	223.488	1087.76	2021.82	1.23:0.74:0.26:0.26:0.81:0.31:1.53:2.84	443.787	1019.81	0.61:1.39	243631	Neurogenic locus notch homolog protein 3 OS=Homo sapiens OX=9606 GN=NOTCH3 PE=1 SV=2
485	TRUE	Q8NBS3|S4A11_HUMAN	6.66	12.57	8	8	Oxidation (M)	10792	9965.32	1042.38	1041.75	1197.65	1582.51	1026.51	1464.93	3.07:2.84:0.30:0.30:0.34:0.45:0.29:0.42	5710.36	1317.9	1.62:0.38	99581	Sodium bicarbonate transporter-like protein 11 OS=Homo sapiens OX=9606 GN=SLC4A11 PE=1 SV=2
644	TRUE	P43121|MUC18_HUMAN	8.31	11.3	5	5		2998.97	2704.1	307.317	402.176	680.79	192.044	450.725	168.652	3.04:2.74:0.31:0.41:0.69:0.19:0.46:0.17	1673.67	451.31	1.58:0.42	71607	Cell surface glycoprotein MUC18 OS=Homo sapiens OX=9606 GN=MCAM PE=1 SV=2
1150	TRUE	Q00536|CDK16_HUMAN	3.84	4.44	2	2		1163.63	1358.38	372.844	583.431	1025.49	775.101	1157.83	1135.79	1.23:1.44:0.39:0.62:1.08:0.82:1.22:1.20	869.57	1023.55	0.92:1.08	55716	Cyclin-dependent kinase 16 OS=Homo sapiens OX=9606 GN=CDK16 PE=1 SV=1
755	TRUE	Q8WUD1|RAB2B_HUMAN	17.23	30.09	5	5	Oxidation (M)	2752.98	2986.21	1567.06	1437.9	4929.35	2890.17	5720.16	4869.26	0.81:0.88:0.46:0.42:1.45:0.85:1.69:1.43	2186.04	4602.23	0.64:1.36	24214	Ras-related protein Rab-2B OS=Homo sapiens OX=9606 GN=RAB2B PE=1 SV=1
444	TRUE	Q9UHN6|CEIP2_HUMAN	0.31	8.6	10	10	Oxidation (M)	6077.18	3982.52	1296.76	4053.17	7517.55	3886.7	2222.58	2295.72	1.55:1.02:0.33:1.03:1.92:0.99:0.57:0.59	3852.41	3980.64	0.98:1.02	154374	Cell surface hyaluronidase OS=Homo sapiens OX=9606 GN=CEMIP2 PE=1 SV=1
1059	TRUE	Q8WUM9|S20A1_HUMAN	0.41	4.71	3	3		1003.65	1588.62	607.03	480.61	440.859	849.064	988.743	1072.98	1.14:1.81:0.69:0.55:0.50:0.97:1.12:1.22	1379.48	1026.28	1.15:0.85	73700	Sodium-dependent phosphate transporter 1 OS=Homo sapiens OX=9606 GN=SLC20A1 PE=1 SV=1
106	TRUE	Q92817|EVPL_HUMAN	17.18	15.54	24	24		1209.19	1192.74	2226.54	2254.93	4128.65	2585.29	2891.03	3216.11	0.49:0.48:0.90:0.92:1.68:1.05:1.17:1.31	1720.85	3205.27	0.70:1.30	231604	Envoplakin OS=Homo sapiens OX=9606 GN=EVPL PE=1 SV=3
1228	TRUE	Q96BI1|S22AI_HUMAN	38.21	5.66	2	2		384.485	327.294	381.793	379.034	2078.95	1023.28	2201.94	2055.54	0.35:0.30:0.35:0.34:1.88:0.93:1.99:1.86	368.152	1839.93	0.33:1.67	44846	Solute carrier family 22 member 18 OS=Homo sapiens OX=9606 GN=SLC22A18 PE=1 SV=3
854	TRUE	Q96IF1|AJUBA_HUMAN	12.3	8.92	4	4	Oxidation (M)	1835.77	281.08	489.908	430.603	3064.46	1202.43	1178.77	1877.54	1.42:0.22:0.38:0.33:2.37:0.93:0.91:1.45	829.832	1920.99	0.60:1.40	56934	LIM domain-containing protein ajuba OS=Homo sapiens OX=9606 GN=AJUBA PE=1 SV=1
213	TRUE	Q8IVT2|MISP_HUMAN	2.62	36.38	17	17		23152.5	20217.7	2692.45	2525.23	7644.47	3208.54	4201.01	6001.52	2.66:2.32:0.31:0.29:0.88:0.37:0.48:0.69	12147	5263.88	1.40:0.60	75357	Mitotic interactor and substrate of PLK1 OS=Homo sapiens OX=9606 GN=MISP PE=1 SV=1
1258	TRUE	Q7Z2K8|GRIN1_HUMAN	4.81	3.08	2	2		549.353	560.882	59.7692	85.7407	786.355	293.701	441.763	242.554	1.46:1.49:0.16:0.23:2.08:0.78:1.17:0.64	445.949	441.093	1.01:0.99	102399	G protein-regulated inducer of neurite outgrowth 1 OS=Homo sapiens OX=9606 GN=GPRIN1 PE=1 SV=2
215	TRUE	P19784|CSK22_HUMAN	10.05	58.86	15	15	Carbamidomethylation; Oxidation (M)	29024.6	21387.3	7249.03	7993.87	34523.9	19901.9	34122.5	27888.1	1.28:0.94:0.32:0.35:1.52:0.87:1.50:1.23	16413.7	29109.1	0.72:1.28	41213	Casein kinase II subunit alpha' OS=Homo sapiens OX=9606 GN=CSNK2A2 PE=1 SV=1
641	TRUE	Q9H4G0|E41L1_HUMAN	2.11	3.63	4	3	Oxidation (M)	7070.28	7277.57	16376.9	16668.8	9729.96	12131.2	14362.9	14314.5	0.58:0.59:1.34:1.36:0.79:0.99:1.17:1.17	11848.4	12634.6	0.97:1.03	98503	Band 4.1-like protein 1 OS=Homo sapiens OX=9606 GN=EPB41L1 PE=1 SV=2
500	TRUE	Q8NDI1|EHBP1_HUMAN	0.4	6.5	6	6	Oxidation (M)	4704.31	6511.73	853.436	444.62	2007.29	672.963	2053.72	3000.61	1.86:2.57:0.34:0.18:0.79:0.27:0.81:1.19	3128.52	1933.65	1.24:0.76	140017	EH domain-binding protein 1 OS=Homo sapiens OX=9606 GN=EHBP1 PE=1 SV=3
307	TRUE	Q96J02|ITCH_HUMAN	5.19	14.95	12	11		2970.27	3157.17	933.497	928.685	3128.47	1712.56	2423.56	3428.46	1.27:1.35:0.40:0.40:1.34:0.73:1.04:1.47	1997.4	2673.26	0.86:1.14	102803	E3 ubiquitin-protein ligase Itchy homolog OS=Homo sapiens OX=9606 GN=ITCH PE=1 SV=2
768	TRUE	Q6P1N0|C2D1A_HUMAN	0.27	4.31	3	3		1092.46	1323.24	379.786	318.995	977.401	466.876	556.439	782.119	1.48:1.80:0.52:0.43:1.33:0.63:0.75:1.06	932.135	695.709	1.15:0.85	104062	Coiled-coil and C2 domain-containing protein 1A OS=Homo sapiens OX=9606 GN=CC2D1A PE=1 SV=1
82	TRUE	P12830|CADH1_HUMAN	14.68	36.17	29	28	Carbamidomethylation; Oxidation (M)	294807	287851	140364	138798	518794	339390	326536	383762	0.97:0.95:0.46:0.46:1.71:1.12:1.07:1.26	215455	392120	0.71:1.29	97456	Cadherin-1 OS=Homo sapiens OX=9606 GN=CDH1 PE=1 SV=3
972	TRUE	Q5JTD0|TJAP1_HUMAN	10.41	3.95	2	2		576.832	816.705	224.839	329.248	731.786	779.116	666.632	1058.63	0.89:1.26:0.35:0.51:1.13:1.20:1.03:1.63	486.906	809.042	0.75:1.25	61821	Tight junction-associated protein 1 OS=Homo sapiens OX=9606 GN=TJAP1 PE=1 SV=1
788	TRUE	Q9Y287|ITM2B_HUMAN	1.63	12.03	4	4		3647.18	4387.16	1968.87	1997.31	3335.73	1925.36	2406.88	2728.6	1.30:1.57:0.70:0.71:1.19:0.69:0.86:0.97	3130.69	2726.58	1.07:0.93	30338	Integral membrane protein 2B OS=Homo sapiens OX=9606 GN=ITM2B PE=1 SV=1
830	TRUE	P61421|VA0D1_HUMAN	1.33	18.8	4	4		5170.06	5213.06	661.535	1745.4	4877.03	1641.96	1969.25	4392.34	1.61:1.62:0.21:0.54:1.52:0.51:0.61:1.37	3197.51	3220.14	1.00:1.00	40329	V-type proton ATPase subunit d 1 OS=Homo sapiens OX=9606 GN=ATP6V0D1 PE=1 SV=1
1132	TRUE	Q8N138|ORML3_HUMAN	3.79	16.99	2	2	Acetylation (N-term); Oxidation (M)	1102.67	1045.24	8379.4	8103.8	847.193	14636.5	205.285	724.256	0.25:0.24:1.91:1.85:0.19:3.34:0.05:0.17	4657.78	4103.31	1.06:0.94	17495	ORM1-like protein 3 OS=Homo sapiens OX=9606 GN=ORMDL3 PE=1 SV=1
773	TRUE	Q6IQ22|RAB12_HUMAN	9.19	14.34	3	3		2522.99	2778.71	902.334	3676.11	1430.59	861.667	1442.52	1202.21	1.36:1.50:0.49:1.98:0.77:0.47:0.78:0.65	2470.04	1234.25	1.33:0.67	27248	Ras-related protein Rab-12 OS=Homo sapiens OX=9606 GN=RAB12 PE=1 SV=3
51	TRUE	P29317|EPHA2_HUMAN	2.81	37.81	38	35	Carbamidomethylation; Oxidation (M)	168029	177696	57812.7	59281.2	143380	105504	130541	123160	1.39:1.47:0.48:0.49:1.19:0.87:1.08:1.02	115705	125646	0.96:1.04	108266	Ephrin type-A receptor 2 OS=Homo sapiens OX=9606 GN=EPHA2 PE=1 SV=2
305	TRUE	P18085|ARF4_HUMAN	6.07	31.67	9	6	Carbamidomethylation; Oxidation (M)	24388.4	23087	3635.13	4147	10050.4	3906.33	2779.7	3707.72	2.58:2.44:0.38:0.44:1.06:0.41:0.29:0.39	13883.8	5171.83	1.46:0.54	20511	ADP-ribosylation factor 4 OS=Homo sapiens OX=9606 GN=ARF4 PE=1 SV=3
93	TRUE	P10809|CH60_HUMAN	1.73	58.99	23	23	Carbamidomethylation; Oxidation (M)	69890.9	80883.2	16847.2	22206.9	63533.5	55345.3	31580.7	40774.1	1.47:1.70:0.35:0.47:1.33:1.16:0.66:0.86	47457.1	47808.4	1.00:1.00	61055	60 kDa heat shock protein, mitochondrial OS=Homo sapiens OX=9606 GN=HSPD1 PE=1 SV=2
914	TRUE	P53597|SUCA_HUMAN	1.08	10.69	3	3	Oxidation (M)	3784.92	3849.06	235.616	111.127	1523.91	67.735	1284.32	728.511	2.61:2.66:0.16:0.08:1.05:0.05:0.89:0.50	2499.11	985.406	1.43:0.57	36250	Succinate--CoA ligase [ADP/GDP-forming] subunit alpha, mitochondrial OS=Homo sapiens OX=9606 GN=SUCLG1 PE=1 SV=4
282	TRUE	Q5JWF2|GNAS1_HUMAN	4.81	12.73	10	10	Oxidation (M)	10439.6	11045.6	1853.47	1848.82	9113.29	6679.76	6817.61	8376.32	1.49:1.57:0.26:0.26:1.30:0.95:0.97:1.19	6296.86	7746.74	0.90:1.10	111025	Guanine nucleotide-binding protein G(s) subunit alpha isoforms XLas OS=Homo sapiens OX=9606 GN=GNAS PE=1 SV=2
529	TRUE	P42566|EPS15_HUMAN	9.32	8.15	6	6		3090.17	1810.35	1181.77	1067.06	2891.97	2600.82	2335.84	2440.45	1.42:0.83:0.54:0.49:1.33:1.19:1.07:1.12	1787.34	2567.27	0.82:1.18	98656	Epidermal growth factor receptor substrate 15 OS=Homo sapiens OX=9606 GN=EPS15 PE=1 SV=2
692	TRUE	Q9BZL6|KPCD2_HUMAN	0.82	8.09	5	5	Carbamidomethylation	6958.07	7098.05	757.223	534.288	3604.19	1436.9	2600.22	2856.44	2.15:2.20:0.23:0.17:1.12:0.44:0.80:0.88	3836.91	2624.44	1.19:0.81	96722	Serine/threonine-protein kinase D2 OS=Homo sapiens OX=9606 GN=PRKD2 PE=1 SV=3
138	TRUE	Q15262|PTPRK_HUMAN	0.22	20.5	22	22	Carbamidomethylation; Oxidation (M)	599122	578508	177882	184280	342647	219601	354345	387731	1.69:1.63:0.50:0.52:0.96:0.62:1.00:1.09	384948	326081	1.08:0.92	162102	Receptor-type tyrosine-protein phosphatase kappa OS=Homo sapiens OX=9606 GN=PTPRK PE=1 SV=2
298	TRUE	Q15758|AAAT_HUMAN	5.43	20.7	11	11	Acetylation (N-term); Carbamidomethylation; Oxidation (M)	24122.1	19723	10707.6	10642.3	20797.7	14968.2	22083.8	23458.1	1.32:1.08:0.58:0.58:1.14:0.82:1.21:1.28	16298.7	20327	0.89:1.11	56598	Neutral amino acid transporter B(0) OS=Homo sapiens OX=9606 GN=SLC1A5 PE=1 SV=2
53	TRUE	Q9Y490|TLN1_HUMAN	12.75	23.06	42	39	Carbamidomethylation; Oxidation (M)	16640.1	16729.8	20425.3	20732.4	7730.82	20709.7	4299.89	6701.91	1.17:1.17:1.43:1.46:0.54:1.45:0.30:0.47	18631.9	9860.59	1.31:0.69	269767	Talin-1 OS=Homo sapiens OX=9606 GN=TLN1 PE=1 SV=3
870	TRUE	O15126|SCAM1_HUMAN	4	13.91	3	3	Oxidation (M)	4499.69	4889.71	1072.43	939.47	1368.2	887.313	1724.97	1872.06	2.09:2.27:0.50:0.44:0.63:0.41:0.80:0.87	2850.33	1463.14	1.32:0.68	37920	Secretory carrier-associated membrane protein 1 OS=Homo sapiens OX=9606 GN=SCAMP1 PE=1 SV=2
403	TRUE	Q9UI12|VATH_HUMAN	2.95	27.95	9	9	Oxidation (M)	6612.63	6625.48	1797.33	1480.04	3115.32	675.048	3159.6	3536.6	1.96:1.96:0.53:0.44:0.92:0.20:0.94:1.05	4128.87	2621.64	1.22:0.78	55883	V-type proton ATPase subunit H OS=Homo sapiens OX=9606 GN=ATP6V1H PE=1 SV=1
638	TRUE	Q7L5Y9|MAEA_HUMAN	7.25	23.99	7	7	Oxidation (M)	2526.79	3651.46	1140.53	891.766	4362.45	1747.46	3417.01	3560.69	0.95:1.37:0.43:0.33:1.64:0.66:1.28:1.34	2159.3	3271.9	0.80:1.20	45287	E3 ubiquitin-protein transferase MAEA OS=Homo sapiens OX=9606 GN=MAEA PE=1 SV=1
89	TRUE	Q5JTH9|RRP12_HUMAN	0.18	32.15	29	29	Carbamidomethylation; Oxidation (M)	53581.4	54408.7	3143.93	3182.14	16874.4	6653.7	13271.2	16309.8	2.56:2.60:0.15:0.15:0.81:0.32:0.63:0.78	28579	13277.3	1.37:0.63	143702	RRP12-like protein OS=Homo sapiens OX=9606 GN=RRP12 PE=1 SV=2
522	TRUE	P00749|UROK_HUMAN	5.06	20.19	8	8	Oxidation (M)	27123.3	28316.2	7847.25	8428.7	13517.4	7947.72	12917.5	6200.95	1.93:2.02:0.56:0.60:0.96:0.57:0.92:0.44	17928.9	10145.9	1.28:0.72	48507	Urokinase-type plasminogen activator OS=Homo sapiens OX=9606 GN=PLAU PE=1 SV=2
523	TRUE	Q9UGI8|TES_HUMAN	5.36	22.09	8	8	Carbamidomethylation; Oxidation (M)	6271.41	4255.34	6157.46	639.433	4165.5	1716.95	1092.14	548.462	2.02:1.37:1.98:0.21:1.34:0.55:0.35:0.18	4578.47	1880.76	1.42:0.58	47996	Testin OS=Homo sapiens OX=9606 GN=TES PE=1 SV=1
392	TRUE	Q96SB4|SRPK1_HUMAN	10.81	21.53	10	10	Carbamidomethylation; Oxidation (M)	9985.67	9889.61	2830.51	1755.62	2766.28	697.863	1437.31	2098.37	2.54:2.51:0.72:0.45:0.70:0.18:0.37:0.53	6115.35	1749.96	1.56:0.44	74325	SRSF protein kinase 1 OS=Homo sapiens OX=9606 GN=SRPK1 PE=1 SV=2
1047	TRUE	Q86UT6|NLRX1_HUMAN	2.53	3.18	2	2		1524.29	1195.86	385.56	396.075	734.566	417.764	369.243	872.531	2.07:1.62:0.52:0.54:1.00:0.57:0.50:1.18	875.446	598.526	1.19:0.81	107616	NLR family member X1 OS=Homo sapiens OX=9606 GN=NLRX1 PE=1 SV=1
400	TRUE	Q8N2K0|ABD12_HUMAN	0.27	34.67	10	10	Oxidation (M)	7997.85	8044.19	3361.42	3470.65	9268.82	1810.93	6217.81	8302.15	1.32:1.33:0.55:0.57:1.53:0.30:1.03:1.37	5718.52	6399.93	0.94:1.06	45097	Lysophosphatidylserine lipase ABHD12 OS=Homo sapiens OX=9606 GN=ABHD12 PE=1 SV=2
749	TRUE	P15529|MCP_HUMAN	1.56	8.93	6	6	Carbamidomethylation; Oxidation (M)	56924	54821.1	7497.15	7320.26	35279.3	11547	9992.65	14676.7	2.30:2.21:0.30:0.30:1.43:0.47:0.40:0.59	31640.6	17873.9	1.28:0.72	43747	Membrane cofactor protein OS=Homo sapiens OX=9606 GN=CD46 PE=1 SV=3
417	TRUE	Q9P258|RCC2_HUMAN	3.42	28.35	9	9	Carbamidomethylation; Oxidation (M)	12018	12479.4	3106.46	2791.86	11233.1	4864.57	9247.08	11057.6	1.44:1.49:0.37:0.33:1.35:0.58:1.11:1.32	7598.94	9100.57	0.91:1.09	56085	Protein RCC2 OS=Homo sapiens OX=9606 GN=RCC2 PE=1 SV=2
234	TRUE	Q9UQB8|BAIP2_HUMAN	18.39	37.32	16	16	Carbamidomethylation; Oxidation (M)	8415.69	7245.65	2533.98	2184.83	16663	10784.5	21145.3	14794.1	0.80:0.69:0.24:0.21:1.59:1.03:2.02:1.41	5095.04	15846.7	0.49:1.51	60868	Brain-specific angiogenesis inhibitor 1-associated protein 2 OS=Homo sapiens OX=9606 GN=BAIAP2 PE=1 SV=1
303	TRUE	O95817|BAG3_HUMAN	27.83	31.13	14	14	Oxidation (M)	4595.38	5627.23	2074.96	2272.59	14647.6	11118.1	13454.9	15482.3	0.53:0.65:0.24:0.26:1.69:1.28:1.55:1.79	3642.54	13675.7	0.42:1.58	61595	BAG family molecular chaperone regulator 3 OS=Homo sapiens OX=9606 GN=BAG3 PE=1 SV=3
182	TRUE	Q04912|RON_HUMAN	0.9	19	19	19	Carbamidomethylation; Oxidation (M)	21393.3	22413.5	2383.16	2337.46	7162.77	2784.96	7956.19	8446.71	2.29:2.39:0.25:0.25:0.77:0.30:0.85:0.90	12131.9	6587.66	1.30:0.70	152241	Macrophage-stimulating protein receptor OS=Homo sapiens OX=9606 GN=MST1R PE=1 SV=3
1019	TRUE	Q96S97|MYADM_HUMAN	0.99	10.25	2	2	Oxidation (M)	20217.6	19002.4	1424.23	2678.38	5764.21	2453	5456.65	8664.05	2.46:2.32:0.17:0.33:0.70:0.30:0.66:1.06	10830.7	5584.48	1.32:0.68	35274	Myeloid-associated differentiation marker OS=Homo sapiens OX=9606 GN=MYADM PE=1 SV=2
531	TRUE	P55010|IF5_HUMAN	7.46	18.1	7	7	Oxidation (M)	6070.56	6333.51	2428.76	2291.2	4431.64	5683.3	6216.85	9901.65	1.12:1.17:0.45:0.42:0.82:1.05:1.15:1.83	4281.01	6558.36	0.79:1.21	49223	Eukaryotic translation initiation factor 5 OS=Homo sapiens OX=9606 GN=EIF5 PE=1 SV=2
154	TRUE	O00159|MYO1C_HUMAN	6.84	23.61	20	19	Oxidation (M)	11173.8	14162.6	3237	3069.79	14663.3	8047.48	12505.8	11605.4	1.14:1.44:0.33:0.31:1.50:0.82:1.28:1.18	7910.78	11705.5	0.81:1.19	121682	Unconventional myosin-Ic OS=Homo sapiens OX=9606 GN=MYO1C PE=1 SV=4
727	TRUE	Q9Y6M5|ZNT1_HUMAN	0.44	22.49	6	6		44692	50300.5	5629.53	5735.61	18768.5	9611.78	14507.6	20068.5	2.11:2.38:0.27:0.27:0.89:0.45:0.69:0.95	26589.4	15739.1	1.26:0.74	55300	Zinc transporter 1 OS=Homo sapiens OX=9606 GN=SLC30A1 PE=1 SV=3
330	TRUE	P19634|SL9A1_HUMAN	3.2	14.85	10	10	Oxidation (M)	20488	18282.2	3890.59	3260.65	14326.3	7858.52	14239.1	13946.5	1.70:1.52:0.32:0.27:1.19:0.65:1.18:1.16	11480.4	12592.6	0.95:1.05	90763	Sodium/hydrogen exchanger 1 OS=Homo sapiens OX=9606 GN=SLC9A1 PE=1 SV=2
1140	TRUE	O75608|LYPA1_HUMAN	1.06	16.09	2	2		7068.4	6877.51	426.236	428.719	2977.44	1226.97	2166.1	2926.43	2.35:2.28:0.14:0.14:0.99:0.41:0.72:0.97	3700.22	2324.23	1.23:0.77	24670	Acyl-protein thioesterase 1 OS=Homo sapiens OX=9606 GN=LYPLA1 PE=1 SV=1
9	TRUE	P10586|PTPRF_HUMAN	17.65	51.28	93	84	Carbamidomethylation; Oxidation (M)	84513.8	86427.7	49663.6	50095.5	125293	88640.9	137349	136166	0.89:0.91:0.52:0.53:1.32:0.94:1.45:1.44	67675.1	121862	0.71:1.29	212879	Receptor-type tyrosine-protein phosphatase F OS=Homo sapiens OX=9606 GN=PTPRF PE=1 SV=2
1074	TRUE	Q08334|I10R2_HUMAN	13.08	11.08	3	3	Oxidation (M)	1708.41	1912.34	1301.87	1267.56	4934.93	2057.14	1897.11	2979.94	0.76:0.85:0.58:0.56:2.19:0.91:0.84:1.32	1547.54	2967.28	0.69:1.31	36995	Interleukin-10 receptor subunit beta OS=Homo sapiens OX=9606 GN=IL10RB PE=1 SV=2
462	TRUE	Q8NBU5|ATAD1_HUMAN	5.6	32.41	8	8	Carbamidomethylation; Oxidation (M)	25871	25768.1	3640.7	3745.03	19351.1	11950.8	26486.3	25184.6	1.46:1.45:0.21:0.21:1.09:0.67:1.49:1.42	14756.2	20743.2	0.83:1.17	40744	ATPase family AAA domain-containing protein 1 OS=Homo sapiens OX=9606 GN=ATAD1 PE=1 SV=1
295	TRUE	P61106|RAB14_HUMAN	11.69	72.09	12	12	Carbamidomethylation; Oxidation (M)	18744.5	17357.7	7544.11	6505.38	22710.3	16462.9	22935	24406.5	1.10:1.02:0.44:0.38:1.33:0.96:1.34:1.43	12537.9	21628.7	0.73:1.27	23897	Ras-related protein Rab-14 OS=Homo sapiens OX=9606 GN=RAB14 PE=1 SV=4
130	TRUE	Q12860|CNTN1_HUMAN	2.67	29.47	22	22	Oxidation (M)	18431.3	28152.1	5575.03	6329.6	9026.34	5603.58	9499.69	12435.9	1.55:2.37:0.47:0.53:0.76:0.47:0.80:1.05	14622	9141.38	1.23:0.77	113320	Contactin-1 OS=Homo sapiens OX=9606 GN=CNTN1 PE=1 SV=1
738	TRUE	O43159|RRP8_HUMAN	2.27	19.3	6	6		13895.7	14958.6	1796.15	1595.91	2351.03	1847.14	4529.35	6490.94	2.34:2.52:0.30:0.27:0.40:0.31:0.76:1.09	8061.58	3804.61	1.36:0.64	50715	Ribosomal RNA-processing protein 8 OS=Homo sapiens OX=9606 GN=RRP8 PE=1 SV=2
255	TRUE	O43491|E41L2_HUMAN	0.99	11.84	11	10	Oxidation (M)	4642.76	4812.53	127.392	1268.22	1373.82	2397.68	1098.16	2572.54	2.03:2.10:0.06:0.55:0.60:1.05:0.48:1.13	3353.89	1860.55	1.29:0.71	112588	Band 4.1-like protein 2 OS=Homo sapiens OX=9606 GN=EPB41L2 PE=1 SV=1
711	TRUE	Q8N158|GPC2_HUMAN	2.73	10.71	4	4		3564.3	3467.07	985.502	914.072	1474.85	830.734	1621.57	1855.98	1.94:1.89:0.54:0.50:0.80:0.45:0.88:1.01	2232.74	1445.78	1.21:0.79	62830	Glypican-2 OS=Homo sapiens OX=9606 GN=GPC2 PE=2 SV=1
467	TRUE	P55011|S12A2_HUMAN	2.12	5.78	5	5	Oxidation (M)	3025.99	2432.33	581.518	2292.56	1775.58	770.602	1468.93	1956.78	1.69:1.36:0.33:1.28:0.99:0.43:0.82:1.09	2457.6	1492.97	1.24:0.76	131447	Solute carrier family 12 member 2 OS=Homo sapiens OX=9606 GN=SLC12A2 PE=1 SV=1
866	TRUE	P55201|BRPF1_HUMAN	33.22	3.13	4	4		1301.73	1015.94	801.314	858.761	3404.98	2417.2	2210.94	2513.27	0.72:0.56:0.44:0.47:1.88:1.33:1.22:1.38	1268.06	2636.6	0.65:1.35	137499	Peregrin OS=Homo sapiens OX=9606 GN=BRPF1 PE=1 SV=2
466	TRUE	P46459|NSF_HUMAN	0.58	17.2	10	10	Oxidation (M)	5211.47	6356.51	740.227	913.037	3251.36	1197.46	3075.98	2799.39	1.77:2.16:0.25:0.31:1.10:0.41:1.05:0.95	3305.31	2581.05	1.12:0.88	82594	Vesicle-fusing ATPase OS=Homo sapiens OX=9606 GN=NSF PE=1 SV=3
185	TRUE	P22735|TGM1_HUMAN	43.38	29.25	18	18	Oxidation (M)	2391.16	1361.35	975.153	981.314	15717.7	11244.4	15726.4	17538.8	0.29:0.17:0.12:0.12:1.91:1.36:1.91:2.13	1427.25	15056.8	0.17:1.83	89787	Protein-glutamine gamma-glutamyltransferase K OS=Homo sapiens OX=9606 GN=TGM1 PE=1 SV=4
710	TRUE	Q9H2J7|S6A15_HUMAN	4.57	10	5	5		7221.69	6500.43	1373.95	2142.84	2294.04	1241.77	2676.42	2884.89	2.19:1.97:0.42:0.65:0.70:0.38:0.81:0.88	4309.73	2274.28	1.31:0.69	81836	Sodium-dependent neutral amino acid transporter B(0)AT2 OS=Homo sapiens OX=9606 GN=SLC6A15 PE=1 SV=1
296	TRUE	P32004|L1CAM_HUMAN	10.11	11.61	12	12	Oxidation (M)	61038.7	49574.2	55343.6	58835.8	50034.8	23283.2	49877	13455	1.35:1.10:1.22:1.30:1.11:0.52:1.10:0.30	56303	34205.8	1.24:0.76	140003	Neural cell adhesion molecule L1 OS=Homo sapiens OX=9606 GN=L1CAM PE=1 SV=2
54	TRUE	P08238|HS90B_HUMAN	5	36.19	42	24	Carbamidomethylation; Oxidation (M)	260096	235914	61435.8	61252.5	99039.6	68537.3	66695.9	83366.5	2.22:2.02:0.52:0.52:0.85:0.59:0.57:0.71	154674	79409.8	1.32:0.68	83264	Heat shock protein HSP 90-beta OS=Homo sapiens OX=9606 GN=HSP90AB1 PE=1 SV=4
564	TRUE	Q9H6X2|ANTR1_HUMAN	1.1	12.06	6	5	Oxidation (M)	3499.95	3606.77	538.211	427.526	2001.55	1030.97	995.283	673.742	2.19:2.26:0.34:0.27:1.25:0.65:0.62:0.42	2658.06	1175.39	1.39:0.61	62789	Anthrax toxin receptor 1 OS=Homo sapiens OX=9606 GN=ANTXR1 PE=1 SV=2
225	TRUE	Q8TEW0|PARD3_HUMAN	0.52	13.35	16	16	Oxidation (M)	4494.7	4210.63	710.711	10877.1	2146.93	8302.89	2003.51	2760.96	1.01:0.95:0.16:2.45:0.48:1.87:0.45:0.62	5073.3	3803.57	1.14:0.86	151423	Partitioning defective 3 homolog OS=Homo sapiens OX=9606 GN=PARD3 PE=1 SV=2
1053	TRUE	Q15014|MO4L2_HUMAN	1.16	12.85	3	3	Oxidation (M)	2324.66	3114.25	1625.84	585.454	1916.32	933.538	2666.65	2491.85	1.19:1.59:0.83:0.30:0.98:0.48:1.36:1.27	1912.55	2002.09	0.98:1.02	32308	Mortality factor 4-like protein 2 OS=Homo sapiens OX=9606 GN=MORF4L2 PE=1 SV=1
629	TRUE	O60353|FZD6_HUMAN	10.85	7.08	4	4	Carbamidomethylation; Oxidation (M)	5577.43	4323.85	1794.67	1875.53	5923.92	5554.54	4313.16	7860.35	1.20:0.93:0.39:0.40:1.27:1.19:0.93:1.69	3392.87	5912.99	0.73:1.27	79292	Frizzled-6 OS=Homo sapiens OX=9606 GN=FZD6 PE=1 SV=2
637	TRUE	P35613|BASI_HUMAN	9.06	17.66	5	5	Oxidation (M)	12454.5	13248.6	8060.55	7925.49	11717.2	12506	13522.4	15673.8	1.05:1.11:0.68:0.67:0.99:1.05:1.14:1.32	10422.3	13354.8	0.88:1.12	42200	Basigin OS=Homo sapiens OX=9606 GN=BSG PE=1 SV=2
902	TRUE	Q9BZR6|RTN4R_HUMAN	9.54	6.55	3	3		4721.3	6123.23	1354.89	1331.9	2073.93	1041.6	636.939	1125.03	2.05:2.66:0.59:0.58:0.90:0.45:0.28:0.49	3449.96	1309.57	1.45:0.55	50708	Reticulon-4 receptor OS=Homo sapiens OX=9606 GN=RTN4R PE=1 SV=1
967	TRUE	Q8IZ07|AN13A_HUMAN	5.35	6.44	3	3		728.005	710.769	261.847	205.584	825.924	529.487	535.495	589.998	1.33:1.30:0.48:0.37:1.51:0.97:0.98:1.08	476.551	620.226	0.87:1.13	67619	Ankyrin repeat domain-containing protein 13A OS=Homo sapiens OX=9606 GN=ANKRD13A PE=1 SV=3
548	TRUE	Q96JB2|COG3_HUMAN	1.84	9.42	6	6	Acetylation (N-term); Oxidation (M)	2731.74	2563.06	701.119	1032.69	1103.78	2016.43	1187.01	946.664	1.78:1.67:0.46:0.67:0.72:1.31:0.77:0.62	1757.15	1313.47	1.14:0.86	94096	Conserved oligomeric Golgi complex subunit 3 OS=Homo sapiens OX=9606 GN=COG3 PE=1 SV=3
943	TRUE	Q9NS86|LANC2_HUMAN	12.59	7.33	3	3	Oxidation (M)	1521.3	1577.19	1299.81	1563.24	2515.74	1373.3	2777.59	2472.67	0.81:0.84:0.69:0.83:1.33:0.73:1.47:1.31	1490.38	2284.83	0.79:1.21	50854	LanC-like protein 2 OS=Homo sapiens OX=9606 GN=LANCL2 PE=1 SV=1
1201	TRUE	P78325|ADAM8_HUMAN	6.65	3.4	2	2		584.249	699.032	393.85	186.652	325.918	275.164	298.135	200.882	1.58:1.89:1.06:0.50:0.88:0.74:0.80:0.54	465.946	311.282	1.20:0.80	88771	Disintegrin and metalloproteinase domain-containing protein 8 OS=Homo sapiens OX=9606 GN=ADAM8 PE=1 SV=2
700	TRUE	Q08209|PP2BA_HUMAN	3.73	9.4	4	4	Oxidation (M)	2484.68	2420.12	1741.72	1304.71	1660.85	1659.4	1945.84	1451.09	1.36:1.32:0.95:0.71:0.91:0.91:1.06:0.79	1987.81	1679.3	1.08:0.92	58688	Serine/threonine-protein phosphatase 2B catalytic subunit alpha isoform OS=Homo sapiens OX=9606 GN=PPP3CA PE=1 SV=1
624	TRUE	Q9UQC9|CLCA2_HUMAN	19.83	9.97	6	6	Oxidation (M)	1214.12	1247.51	780.823	902.351	2016.03	1392.57	2613.86	1850.19	0.81:0.83:0.52:0.60:1.34:0.93:1.74:1.23	1036.2	1968.16	0.69:1.31	103941	Calcium-activated chloride channel regulator 2 OS=Homo sapiens OX=9606 GN=CLCA2 PE=1 SV=2
317	TRUE	Q9HCK8|CHD8_HUMAN	0.99	5.58	10	10	Oxidation (M)	2851.73	2032.31	407.956	451.211	1574.71	853.942	769.249	1863.73	2.11:1.50:0.30:0.33:1.17:0.63:0.57:1.38	1568.69	1265.41	1.11:0.89	290519	Chromodomain-helicase-DNA-binding protein 8 OS=Homo sapiens OX=9606 GN=CHD8 PE=1 SV=5
894	TRUE	P30825|SL7A1_HUMAN	0.13	6.36	4	3	Carbamidomethylation; Oxidation (M)	5499.49	5647.45	1030.1	1272.33	2733.8	1185.17	3340.55	4078.43	1.77:1.82:0.33:0.41:0.88:0.38:1.08:1.32	3457.86	2977	1.07:0.93	67638	High affinity cationic amino acid transporter 1 OS=Homo sapiens OX=9606 GN=SLC7A1 PE=1 SV=1
751	TRUE	P41743|KPCI_HUMAN	2.89	9.9	4	4		2965.57	1948.14	717.001	590.567	1417.88	2058.59	1605.7	1568.6	1.84:1.21:0.45:0.37:0.88:1.28:1.00:0.97	1796.03	1737.04	1.02:0.98	68262	Protein kinase C iota type OS=Homo sapiens OX=9606 GN=PRKCI PE=1 SV=2
369	TRUE	Q8WUX1|S38A5_HUMAN	35.16	12.08	5	5	Oxidation (M)	20238.7	21031.6	7035.4	8511.77	565.628	1542.17	554.683	503.153	2.70:2.81:0.94:1.14:0.08:0.21:0.07:0.07	14204.4	829.614	1.89:0.11	51457	Sodium-coupled neutral amino acid transporter 5 OS=Homo sapiens OX=9606 GN=SLC38A5 PE=1 SV=1
596	TRUE	P51159|RB27A_HUMAN	3.13	23.98	5	5		2531.7	1795.82	16584.1	225.195	2421.09	25094.4	1946.06	3302.42	0.38:0.27:2.46:0.03:0.36:3.72:0.29:0.49	5339.02	8282.95	0.78:1.22	24868	Ras-related protein Rab-27A OS=Homo sapiens OX=9606 GN=RAB27A PE=1 SV=3
1079	TRUE	Q14728|MFS10_HUMAN	4.09	7.47	3	3		2597.25	2916.73	435.772	842.632	2047.77	1589.75	2756.27	1786.29	1.39:1.56:0.23:0.45:1.09:0.85:1.47:0.95	1955.81	2190.63	0.94:1.06	48339	Major facilitator superfamily domain-containing protein 10 OS=Homo sapiens OX=9606 GN=MFSD10 PE=1 SV=1
668	TRUE	Q8NHP6|MSPD2_HUMAN	3.58	11.78	5	5		3589.15	4014.5	811.936	820.045	3796.4	2475.68	2165.34	2191.06	1.45:1.62:0.33:0.33:1.53:1.00:0.87:0.88	2308.91	2657.12	0.93:1.07	59746	Motile sperm domain-containing protein 2 OS=Homo sapiens OX=9606 GN=MOSPD2 PE=1 SV=1
363	TRUE	Q9BTX1|NDC1_HUMAN	6.59	17.06	9	9	Oxidation (M)	9728.73	11421.2	1687.17	2017.64	2724.53	2295.73	1892.09	1921.68	2.31:2.71:0.40:0.48:0.65:0.55:0.45:0.46	6352.35	2232.33	1.48:0.52	76305	Nucleoporin NDC1 OS=Homo sapiens OX=9606 GN=NDC1 PE=1 SV=2
362	TRUE	P20936|RASA1_HUMAN	4.54	14.23	10	10	Carbamidomethylation; Oxidation (M)	6609.72	6424.14	1123.54	700.704	1370.48	1180.44	1225.54	1573.37	2.62:2.54:0.44:0.28:0.54:0.47:0.49:0.62	4245.84	1337.46	1.52:0.48	116403	Ras GTPase-activating protein 1 OS=Homo sapiens OX=9606 GN=RASA1 PE=1 SV=1
823	TRUE	Q9NRU3|CNNM1_HUMAN	0.95	2.21	5	2		1210.84	1104.99	180.238	261.64	736.698	621.133	319.647	747.841	1.87:1.71:0.28:0.40:1.14:0.96:0.49:1.15	778.946	606.33	1.12:0.88	104351	Metal transporter CNNM1 OS=Homo sapiens OX=9606 GN=CNNM1 PE=1 SV=3
204	TRUE	O60292|SI1L3_HUMAN	8.49	10.61	15	15	Oxidation (M)	6158.93	5996.21	823.25	1036.93	1069.37	961.633	905.327	826.648	2.77:2.70:0.37:0.47:0.48:0.43:0.41:0.37	3503.83	940.743	1.58:0.42	194610	Signal-induced proliferation-associated 1-like protein 3 OS=Homo sapiens OX=9606 GN=SIPA1L3 PE=1 SV=3
824	TRUE	Q92542|NICA_HUMAN	30.96	8.04	4	4	Oxidation (M)	722.096	922.638	643.611	764.708	3405.55	2150	3345.61	1639.37	0.42:0.54:0.38:0.45:2.00:1.27:1.97:0.96	954.951	2702.54	0.52:1.48	78411	Nicastrin OS=Homo sapiens OX=9606 GN=NCSTN PE=1 SV=2
246	TRUE	Q6NSJ5|LRC8E_HUMAN	6.85	20.23	12	11	Oxidation (M)	7308.7	6860.44	1326.93	1671.21	7571.16	3977.24	6776.47	8345.54	1.33:1.25:0.24:0.30:1.38:0.73:1.24:1.52	4291.82	6667.6	0.78:1.22	90247	Volume-regulated anion channel subunit LRRC8E OS=Homo sapiens OX=9606 GN=LRRC8E PE=1 SV=2
820	TRUE	O14641|DVL2_HUMAN	2.78	5.43	4	3	Oxidation (M)	527.506	1477.08	470.384	625.958	1171.11	939.119	868.113	545.479	0.64:1.78:0.57:0.76:1.41:1.13:1.05:0.66	991.097	880.955	1.06:0.94	78948	Segment polarity protein dishevelled homolog DVL-2 OS=Homo sapiens OX=9606 GN=DVL2 PE=1 SV=1
517	TRUE	Q9ULG1|INO80_HUMAN	3.37	4.69	6	6		1324.7	1555.67	512.335	606.985	810.534	491.05	665.434	913.55	1.54:1.81:0.60:0.71:0.94:0.57:0.77:1.06	1236.49	720.142	1.26:0.74	176753	Chromatin-remodeling ATPase INO80 OS=Homo sapiens OX=9606 GN=INO80 PE=1 SV=2
536	TRUE	Q9UN70|PCDGK_HUMAN	6.89	8.14	8	6		1037.58	1186.43	405.832	304.574	1570.95	527.657	1532.48	1358.08	1.05:1.20:0.41:0.31:1.59:0.53:1.55:1.37	769.579	1247.29	0.76:1.24	101077	Protocadherin gamma-C3 OS=Homo sapiens OX=9606 GN=PCDHGC3 PE=1 SV=1
980	TRUE	Q7Z4W1|DCXR_HUMAN	2.8	9.43	2	2		895.534	796.344	4059.19	4455.72	378.723	8714.58	414.286	907.653	0.35:0.31:1.57:1.73:0.15:3.38:0.16:0.35	2551.7	3327.5	0.87:1.13	25913	L-xylulose reductase OS=Homo sapiens OX=9606 GN=DCXR PE=1 SV=2
1038	TRUE	Q9BUZ4|TRAF4_HUMAN	6.04	8.3	3	3		1981.49	1531.22	0	0	1190.01	135.248	984.892	922.633	2.35:1.82:0.00:0.00:1.41:0.16:1.17:1.09	1756.36	922.973	1.31:0.69	53543	TNF receptor-associated factor 4 OS=Homo sapiens OX=9606 GN=TRAF4 PE=1 SV=1
887	TRUE	Q14451|GRB7_HUMAN	2.21	7.52	3	3		4881.36	4695.59	2174.19	1980.12	1912.21	2483.82	3156.83	3560.32	1.57:1.51:0.70:0.64:0.62:0.80:1.02:1.15	3631	2778.29	1.13:0.87	59681	Growth factor receptor-bound protein 7 OS=Homo sapiens OX=9606 GN=GRB7 PE=1 SV=2
503	TRUE	P05120|PAI2_HUMAN	1.06	8.19	3	3	Oxidation (M)	12164.9	10732.7	45185.3	48389.4	20007.6	41405.1	25605.1	7131.14	0.46:0.41:1.72:1.84:0.76:1.57:0.97:0.27	29118.1	23537.2	1.11:0.89	46596	Plasminogen activator inhibitor 2 OS=Homo sapiens OX=9606 GN=SERPINB2 PE=1 SV=2
682	TRUE	Q14699|RFTN1_HUMAN	4.63	7.09	3	3		1885.63	1753.31	173.515	149.988	202.404	169.922	436.834	286.33	2.98:2.77:0.27:0.24:0.32:0.27:0.69:0.45	1309.48	301.87	1.63:0.37	63146	Raftlin OS=Homo sapiens OX=9606 GN=RFTN1 PE=1 SV=4
1256	TRUE	Q9BZF3|OSBL6_HUMAN	4.74	2.89	2	2		653.067	643.212	92.1153	83.0716	588.567	328.331	541.128	371.228	1.58:1.56:0.22:0.20:1.43:0.80:1.31:0.90	433.644	457.314	0.97:1.03	106306	Oxysterol-binding protein-related protein 6 OS=Homo sapiens OX=9606 GN=OSBPL6 PE=1 SV=1
706	TRUE	Q8TAG9|EXOC6_HUMAN	21.6	4.6	3	3	Acetylation (N-term)	337.642	404.643	180.421	159.239	719.207	535.799	865.606	660.01	0.70:0.84:0.37:0.33:1.49:1.11:1.79:1.37	270.486	695.155	0.56:1.44	93722	Exocyst complex component 6 OS=Homo sapiens OX=9606 GN=EXOC6 PE=1 SV=3
850	TRUE	P18827|SDC1_HUMAN	28.92	15.81	4	4		1727.2	1485.46	717.751	660.633	7056.6	3700.17	5152.87	5154.99	0.54:0.46:0.22:0.21:2.20:1.15:1.61:1.61	1147.76	5266.16	0.36:1.64	32462	Syndecan-1 OS=Homo sapiens OX=9606 GN=SDC1 PE=1 SV=3
572	TRUE	P16422|EPCAM_HUMAN	1.23	25.8	6	6	Carbamidomethylation; Oxidation (M)	29195	27196.3	11141.4	11246.8	18607.6	13044.3	22031.3	28025.7	1.46:1.36:0.56:0.56:0.93:0.65:1.10:1.40	19694.9	20427.2	0.98:1.02	34932	Epithelial cell adhesion molecule OS=Homo sapiens OX=9606 GN=EPCAM PE=1 SV=2
809	TRUE	Q8WWI1|LMO7_HUMAN	6.06	3.68	5	5	Oxidation (M)	2411.73	1366.86	1659.63	1749.44	1555.25	779.865	1298.46	1916.76	1.51:0.86:1.04:1.10:0.98:0.49:0.82:1.20	1796.91	1387.58	1.13:0.87	192696	LIM domain only protein 7 OS=Homo sapiens OX=9606 GN=LMO7 PE=1 SV=3
318	TRUE	Q01650|LAT1_HUMAN	16.62	21.5	8	8	Carbamidomethylation; Oxidation (M)	114059	111720	50216.1	52335.7	196270	117960	173842	204727	0.89:0.88:0.39:0.41:1.54:0.92:1.36:1.60	82082.7	173200	0.64:1.36	55010	Large neutral amino acids transporter small subunit 1 OS=Homo sapiens OX=9606 GN=SLC7A5 PE=1 SV=2
625	TRUE	P67775|PP2AA_HUMAN	14.41	21.36	5	4	Carbamidomethylation; Oxidation (M)	9703.32	2436.09	2431.06	1065.28	476.503	766.797	1177.91	702.497	4.14:1.04:1.04:0.45:0.20:0.33:0.50:0.30	4050.8	1248.83	1.53:0.47	35594	Serine/threonine-protein phosphatase 2A catalytic subunit alpha isoform OS=Homo sapiens OX=9606 GN=PPP2CA PE=1 SV=1
344	TRUE	P54709|AT1B3_HUMAN	3.54	43.37	12	12	Oxidation (M)	43308.9	42192.7	31274.9	29586.9	26053.7	40576.5	58363.2	54295	1.06:1.04:0.77:0.73:0.64:1.00:1.43:1.33	36590.9	44822.1	0.90:1.10	31513	Sodium/potassium-transporting ATPase subunit beta-3 OS=Homo sapiens OX=9606 GN=ATP1B3 PE=1 SV=1
789	TRUE	Q8N5A5|ZGPAT_HUMAN	3.56	9.98	4	4		2069.25	2102.84	791.163	802.201	1097.01	1381.38	1080.56	541.431	1.68:1.71:0.64:0.65:0.89:1.12:0.88:0.44	1441.36	1025.1	1.17:0.83	57359	Zinc finger CCCH-type with G patch domain-containing protein OS=Homo sapiens OX=9606 GN=ZGPAT PE=1 SV=3
725	TRUE	P18084|ITB5_HUMAN	2.7	4.38	3	3	Oxidation (M)	7090.21	5943.49	2602.4	2358.71	3728.09	2304.1	3771.49	3595.36	1.81:1.51:0.66:0.60:0.95:0.59:0.96:0.92	4650.9	3396.15	1.16:0.84	88054	Integrin beta-5 OS=Homo sapiens OX=9606 GN=ITGB5 PE=1 SV=1
389	TRUE	Q96EY7|PTCD3_HUMAN	2.37	18.87	11	11	Carbamidomethylation; Oxidation (M)	9847.26	9134.46	1312.22	1519.18	2877.4	1659.32	3046.18	3221.86	2.42:2.24:0.32:0.37:0.71:0.41:0.75:0.79	5744.65	2768.85	1.35:0.65	78550	Pentatricopeptide repeat domain-containing protein 3, mitochondrial OS=Homo sapiens OX=9606 GN=PTCD3 PE=1 SV=3
336	TRUE	P27105|STOM_HUMAN	3.64	36.46	7	7	Oxidation (M)	26459.3	25002.8	4362.16	3821.89	22284.7	14042.8	14817.5	14761.5	1.69:1.59:0.28:0.24:1.42:0.89:0.94:0.94	14911.5	16476.6	0.95:1.05	31731	Stomatin OS=Homo sapiens OX=9606 GN=STOM PE=1 SV=3
614	TRUE	Q6P9F7|LRC8B_HUMAN	7.84	7.1	4	4	Carbamidomethylation	1798.92	1570.59	6515.34	4072.67	1974.49	840.428	1427.51	2386.42	0.70:0.61:2.53:1.58:0.77:0.33:0.55:0.93	3537.2	1657.21	1.36:0.64	92390	Volume-regulated anion channel subunit LRRC8B OS=Homo sapiens OX=9606 GN=LRRC8B PE=1 SV=2
136	TRUE	Q86YZ3|HORN_HUMAN	1.61	1.72	3	3		186.821	677.745	0	0	249.226	90.8116	364.077	575.36	0.70:2.53:0.00:0.00:0.93:0.34:1.36:2.15	864.566	552.102	1.22:0.78	282390	Hornerin OS=Homo sapiens OX=9606 GN=HRNR PE=1 SV=2
49	TRUE	P17301|ITA2_HUMAN	5.58	38.27	41	41	Carbamidomethylation; Oxidation (M)	217199	259323	67418.1	70992.3	118491	85325.3	66267.1	63574.8	1.83:2.19:0.57:0.60:1.00:0.72:0.56:0.54	153733	83414.5	1.30:0.70	129295	Integrin alpha-2 OS=Homo sapiens OX=9606 GN=ITGA2 PE=1 SV=1
911	TRUE	Q9C037|TRIM4_HUMAN	0.33	6.4	3	3	Oxidation (M)	1429.03	1244.77	110.618	158.369	671.432	197.656	626.886	495.407	2.32:2.02:0.18:0.26:1.09:0.32:1.02:0.80	904.583	541.483	1.25:0.75	57461	E3 ubiquitin-protein ligase TRIM4 OS=Homo sapiens OX=9606 GN=TRIM4 PE=1 SV=2
299	TRUE	Q9NQX3|GEPH_HUMAN	3.81	22.55	11	11	Acetylation (N-term); Carbamidomethylation; Oxidation (M)	4621.75	4394.48	212.059	734.312	1273.08	441.791	516.675	705	2.87:2.73:0.13:0.46:0.79:0.27:0.32:0.44	2738.22	814.089	1.54:0.46	79748	Gephyrin OS=Homo sapiens OX=9606 GN=GPHN PE=1 SV=1
39	TRUE	P08670|VIME_HUMAN	24.28	60.09	50	43	Carbamidomethylation; Oxidation (M)	284147	294618	18930.7	20619.7	2232.32	1384.88	2366.67	2410.15	3.63:3.76:0.24:0.26:0.03:0.02:0.03:0.03	154579	2098.5	1.97:0.03	53652	Vimentin OS=Homo sapiens OX=9606 GN=VIM PE=1 SV=4
1012	TRUE	Q96QD8|S38A2_HUMAN	5.42	10.47	3	3		10143.8	10377.9	2144.14	2773.32	8744.23	4111.67	12604.9	14595.3	1.24:1.27:0.26:0.34:1.07:0.50:1.54:1.78	7042.94	10268.6	0.81:1.19	56026	Sodium-coupled neutral amino acid transporter 2 OS=Homo sapiens OX=9606 GN=SLC38A2 PE=1 SV=2
722	TRUE	O60462|NRP2_HUMAN	2.6	6.87	5	5		5961.35	6487.86	1662.38	1054.99	3049.72	1447.58	1697.04	2619.43	1.99:2.16:0.55:0.35:1.02:0.48:0.57:0.87	4213.36	2301.42	1.29:0.71	104831	Neuropilin-2 OS=Homo sapiens OX=9606 GN=NRP2 PE=1 SV=3
657	TRUE	P49841|GSK3B_HUMAN	1.8	21.9	6	6	Oxidation (M)	3729.64	4049.27	854.925	664.158	2751.78	1210.68	2761.29	2420.34	1.62:1.76:0.37:0.29:1.19:0.53:1.20:1.05	2608.95	2286.02	1.07:0.93	46744	Glycogen synthase kinase-3 beta OS=Homo sapiens OX=9606 GN=GSK3B PE=1 SV=2
649	TRUE	Q9H2K8|TAOK3_HUMAN	19.88	6.35	4	4		913.417	1334.16	609.654	1025.89	2463.87	1360.23	2710.88	3171.92	0.54:0.79:0.36:0.60:1.45:0.80:1.60:1.87	1147.96	2426.73	0.64:1.36	105406	Serine/threonine-protein kinase TAO3 OS=Homo sapiens OX=9606 GN=TAOK3 PE=1 SV=2
15	TRUE	P49327|FAS_HUMAN	3.71	44.6	87	87	Acetylation (N-term); Carbamidomethylation; Oxidation (M)	103445	106189	14588.1	14616.9	38727.5	23197.2	18724.6	18175.8	2.45:2.52:0.35:0.35:0.92:0.55:0.44:0.43	59709.9	24706.3	1.41:0.59	273427	Fatty acid synthase OS=Homo sapiens OX=9606 GN=FASN PE=1 SV=3
356	TRUE	Q15019|SEPT2_HUMAN	5.02	36.84	10	10	Oxidation (M)	11418.2	11879.5	2527.7	3208.23	9080.54	7154.79	8721.21	12563	1.37:1.43:0.30:0.39:1.09:0.86:1.05:1.51	7258.42	9379.9	0.87:1.13	41487	Septin-2 OS=Homo sapiens OX=9606 GN=SEPTIN2 PE=1 SV=1
844	TRUE	Q86UK0|ABCAC_HUMAN	7.09	1.19	3	3	Oxidation (M)	525.247	523.643	269.769	213.377	379.247	512.046	497.302	956.281	1.08:1.08:0.56:0.44:0.78:1.06:1.03:1.97	383.009	728.711	0.69:1.31	293237	ATP-binding cassette sub-family A member 12 OS=Homo sapiens OX=9606 GN=ABCA12 PE=1 SV=3
377	TRUE	Q07666|KHDR1_HUMAN	1.29	27.54	10	10	Oxidation (M)	70331	76637.7	15657	15274.1	51243.7	23195	46165.3	45864.5	1.63:1.78:0.36:0.35:1.19:0.54:1.07:1.07	44474.9	41617.1	1.03:0.97	48227	KH domain-containing, RNA-binding, signal transduction-associated protein 1 OS=Homo sapiens OX=9606 GN=KHDRBS1 PE=1 SV=1
556	TRUE	Q96P48|ARAP1_HUMAN	2.22	7.52	7	7		4265.69	2487.87	3006.95	3420.12	3764.21	3217.73	3327.08	1692.69	1.36:0.79:0.96:1.09:1.20:1.02:1.06:0.54	3295.16	3000.43	1.05:0.95	162192	Arf-GAP with Rho-GAP domain, ANK repeat and PH domain-containing protein 1 OS=Homo sapiens OX=9606 GN=ARAP1 PE=1 SV=3
753	TRUE	O75131|CPNE3_HUMAN	6.5	7.08	4	4		3131.41	3028.25	855.901	486.385	1018.19	598.508	771.353	615.902	2.38:2.31:0.65:0.37:0.78:0.46:0.59:0.47	1875.49	750.988	1.43:0.57	60131	Copine-3 OS=Homo sapiens OX=9606 GN=CPNE3 PE=1 SV=1
42	TRUE	O75051|PLXA2_HUMAN	7.87	26.08	48	38	Carbamidomethylation; Oxidation (M)	30906.1	34202.3	8518.18	8077.95	33151	23689	34636.3	35310.6	1.19:1.31:0.33:0.31:1.27:0.91:1.33:1.35	20426.1	31696.7	0.78:1.22	211104	Plexin-A2 OS=Homo sapiens OX=9606 GN=PLXNA2 PE=1 SV=4
966	TRUE	Q9BPZ7|SIN1_HUMAN	0.28	6.7	3	3	Acetylation (N-term)	5772.97	5591.56	1019.45	1002.15	2807.39	1717.16	2362.34	3436.15	1.95:1.89:0.34:0.34:0.95:0.58:0.80:1.16	4094.9	2781.06	1.19:0.81	59123	Target of rapamycin complex 2 subunit MAPKAP1 OS=Homo sapiens OX=9606 GN=MAPKAP1 PE=1 SV=2
278	TRUE	O75534|CSDE1_HUMAN	0.49	22.31	13	13	Carbamidomethylation; Oxidation (M)	14855.9	14907.8	1366.21	1284.29	5776.61	3987.33	4648.88	5361.88	2.28:2.29:0.21:0.20:0.89:0.61:0.71:0.82	8103.55	4943.67	1.24:0.76	88885	Cold shock domain-containing protein E1 OS=Homo sapiens OX=9606 GN=CSDE1 PE=1 SV=2
762	TRUE	P67870|CSK2B_HUMAN	6.51	26.98	5	5	Carbamidomethylation; Oxidation (M)	49644.3	49363.5	15088.9	15741.8	49541.3	30542.6	51227	53452.2	1.26:1.26:0.38:0.40:1.26:0.78:1.30:1.36	32459.6	46190.8	0.83:1.17	24942	Casein kinase II subunit beta OS=Homo sapiens OX=9606 GN=CSNK2B PE=1 SV=1
845	TRUE	P56962|STX17_HUMAN	3.33	20.53	3	3		1188.26	1307.99	237.794	65.2296	926.755	181.508	1088.96	2073.26	1.34:1.48:0.27:0.07:1.05:0.21:1.23:2.35	1244.19	1465.61	0.92:1.08	33403	Syntaxin-17 OS=Homo sapiens OX=9606 GN=STX17 PE=1 SV=2
658	TRUE	Q9H6B4|CLMP_HUMAN	4.65	19.57	4	4	Oxidation (M)	6031.59	5529.68	1408.98	2229.02	4685.93	2332.17	1400.25	834.245	1.97:1.81:0.46:0.73:1.53:0.76:0.46:0.27	3799.82	2313.15	1.24:0.76	41281	CXADR-like membrane protein OS=Homo sapiens OX=9606 GN=CLMP PE=1 SV=1
1175	TRUE	P32970|CD70_HUMAN	0.17	12.44	2	2		623.951	594.325	81.9702	76.3895	221.838	127.588	313.813	231.698	2.20:2.09:0.29:0.27:0.78:0.45:1.11:0.82	541.597	223.734	1.42:0.58	21118	CD70 antigen OS=Homo sapiens OX=9606 GN=CD70 PE=1 SV=2
366	TRUE	Q9H8M5|CNNM2_HUMAN	18.52	5.94	9	4	Oxidation (M)	603.197	950.592	726.723	724.733	2596.57	890.856	2509.05	3110.68	0.40:0.63:0.48:0.48:1.71:0.59:1.66:2.05	751.311	2276.79	0.50:1.50	96623	Metal transporter CNNM2 OS=Homo sapiens OX=9606 GN=CNNM2 PE=1 SV=2
540	TRUE	P04632|CPNS1_HUMAN	4.03	37.31	6	6	Acetylation (N-term); Carbamidomethylation; Oxidation (M)	2739.99	2299.32	984.908	1012.89	4268.25	1086.07	2057.78	2785.89	1.27:1.07:0.46:0.47:1.98:0.50:0.96:1.29	1759.28	2549.5	0.82:1.18	28316	Calpain small subunit 1 OS=Homo sapiens OX=9606 GN=CAPNS1 PE=1 SV=1
414	TRUE	O95793|STAU1_HUMAN	3.45	20.28	10	10	Oxidation (M)	2220.05	2221.93	899.12	933.122	1619.33	950.901	1223.63	856.4	1.63:1.63:0.66:0.68:1.19:0.70:0.90:0.63	1568.55	1162.57	1.15:0.85	63182	Double-stranded RNA-binding protein Staufen homolog 1 OS=Homo sapiens OX=9606 GN=STAU1 PE=1 SV=2
401	TRUE	Q16658|FSCN1_HUMAN	4.55	23.12	9	9	Carbamidomethylation	11853.5	12791.6	992.944	1557.78	3556.24	1147.65	1798.8	1822	2.67:2.88:0.22:0.35:0.80:0.26:0.41:0.41	6798.94	2081.17	1.53:0.47	54530	Fascin OS=Homo sapiens OX=9606 GN=FSCN1 PE=1 SV=3
59	TRUE	O60610|DIAP1_HUMAN	7.83	36.01	37	37	Carbamidomethylation; Oxidation (M)	9275.97	5426.32	5244.47	4827.9	9130.98	4627.97	14149.5	15425.2	1.09:0.64:0.62:0.57:1.07:0.54:1.66:1.81	6193.66	10833.4	0.73:1.27	141347	Protein diaphanous homolog 1 OS=Homo sapiens OX=9606 GN=DIAPH1 PE=1 SV=2
1206	TRUE	Q15361|TTF1_HUMAN	1.8	3.87	2	2		837.06	855.991	181.551	183.471	342.396	186.441	459.732	334.832	1.98:2.03:0.43:0.43:0.81:0.44:1.09:0.79	626.683	351.354	1.28:0.72	103051	Transcription termination factor 1 OS=Homo sapiens OX=9606 GN=TTF1 PE=1 SV=3
856	TRUE	Q9NR28|DBLOH_HUMAN	1.28	16.74	4	4	Oxidation (M)	3653.2	4189.86	192.366	258.563	1964.18	728.531	1272.26	1344.61	2.15:2.46:0.11:0.15:1.16:0.43:0.75:0.79	2739.15	1492.25	1.29:0.71	27131	Diablo homolog, mitochondrial OS=Homo sapiens OX=9606 GN=DIABLO PE=1 SV=1
558	TRUE	Q9Y5G0|PCDGH_HUMAN	44.06	4.12	5	3	Oxidation (M)	221.12	213.007	161.211	180.472	1490.16	749.694	1260.08	1308.07	0.32:0.31:0.23:0.26:2.13:1.07:1.81:1.87	230.979	1279.41	0.31:1.69	99875	Protocadherin gamma-B5 OS=Homo sapiens OX=9606 GN=PCDHGB5 PE=2 SV=1
489	TRUE	O75882|ATRN_HUMAN	13.97	10.22	9	9	Oxidation (M)	3074.21	3193.22	3323.7	2927.84	914.019	3450.93	442.32	510.555	1.38:1.43:1.49:1.31:0.41:1.55:0.20:0.23	3129.74	1489.05	1.36:0.64	158537	Attractin OS=Homo sapiens OX=9606 GN=ATRN PE=1 SV=2
157	TRUE	Q86W92|LIPB1_HUMAN	6.84	23.84	18	18	Oxidation (M)	5310.35	4782	1829.31	1617.61	6332.59	3441.09	4326.36	5428.08	1.28:1.16:0.44:0.39:1.53:0.83:1.05:1.31	3384.82	4882.03	0.82:1.18	114024	Liprin-beta-1 OS=Homo sapiens OX=9606 GN=PPFIBP1 PE=1 SV=2
190	TRUE	Q8TDW0|LRC8C_HUMAN	0.12	26.53	19	17	Carbamidomethylation; Oxidation (M)	38616.3	36411.4	6474.99	7125.72	22370.8	9420.99	17601.8	18815.4	1.97:1.86:0.33:0.36:1.14:0.48:0.90:0.96	22157.1	17052.2	1.13:0.87	92450	Volume-regulated anion channel subunit LRRC8C OS=Homo sapiens OX=9606 GN=LRRC8C PE=1 SV=2
680	TRUE	P62979|RS27A_HUMAN	5.86	25.64	4	4		236990	243501	52837.1	54818.2	294498	193417	161961	172385	1.34:1.38:0.30:0.31:1.67:1.10:0.92:0.98	147036	205565	0.83:1.17	17965	Ubiquitin-40S ribosomal protein S27a OS=Homo sapiens OX=9606 GN=RPS27A PE=1 SV=2
716	TRUE	Q9NZN8|CNOT2_HUMAN	6.91	8.15	3	3		1231.52	1103.74	487.468	464.254	1607.7	534.548	1672.77	2149.86	1.06:0.95:0.42:0.40:1.39:0.46:1.45:1.86	861.989	1491.22	0.73:1.27	59738	CCR4-NOT transcription complex subunit 2 OS=Homo sapiens OX=9606 GN=CNOT2 PE=1 SV=1
1044	TRUE	Q15382|RHEB_HUMAN	6.09	20.11	3	3	Oxidation (M)	11149.9	4377.32	3889.28	3767.09	1484.8	1963.15	11299.5	1055.7	2.29:0.90:0.80:0.77:0.30:0.40:2.32:0.22	5795.89	3950.78	1.19:0.81	20497	GTP-binding protein Rheb OS=Homo sapiens OX=9606 GN=RHEB PE=1 SV=1
528	TRUE	Q9UPT5|EXOC7_HUMAN	2.38	10.48	6	6	Oxidation (M)	1493.39	1222.03	1514.11	1605.6	1666.18	801.368	2746.49	2334.29	0.89:0.73:0.91:0.96:1.00:0.48:1.64:1.40	1540.17	1887.08	0.90:1.10	83382	Exocyst complex component 7 OS=Homo sapiens OX=9606 GN=EXOC7 PE=1 SV=3
1017	TRUE	O75096|LRP4_HUMAN	9.99	2.31	3	3		1037.41	631.957	0	0	253.93	53.8965	96.7233	501.547	3.22:1.96:0.00:0.00:0.79:0.17:0.30:1.56	834.684	302.032	1.47:0.53	212045	Low-density lipoprotein receptor-related protein 4 OS=Homo sapiens OX=9606 GN=LRP4 PE=1 SV=4
29	TRUE	P23229|ITA6_HUMAN	36.26	45.22	57	57	Acetylation (N-term); Carbamidomethylation; Oxidation (M)	94207.3	88311.6	42547.5	42976.4	388381	309541	394228	365415	0.44:0.41:0.20:0.20:1.80:1.44:1.83:1.69	67010.7	364391	0.31:1.69	126606	Integrin alpha-6 OS=Homo sapiens OX=9606 GN=ITGA6 PE=1 SV=5
74	TRUE	P08069|IGF1R_HUMAN	1.04	24.87	29	25	Carbamidomethylation; Oxidation (M)	20979.7	24721.6	40278.2	41606.9	25953.9	83256.1	23903.5	24966.4	0.59:0.69:1.13:1.17:0.73:2.33:0.67:0.70	31896.6	39520	0.89:1.11	154793	Insulin-like growth factor 1 receptor OS=Homo sapiens OX=9606 GN=IGF1R PE=1 SV=1
290	TRUE	Q86SQ0|PHLB2_HUMAN	6.73	11.73	11	11	Oxidation (M)	1307.6	6652.35	2988.76	2715.68	11597.6	8539.61	9619.89	1670.48	0.23:1.18:0.53:0.48:2.06:1.52:1.71:0.30	3416.1	7856.89	0.61:1.39	142158	Pleckstrin homology-like domain family B member 2 OS=Homo sapiens OX=9606 GN=PHLDB2 PE=1 SV=2
207	TRUE	Q6P4Q7|CNNM4_HUMAN	11.93	26.58	18	16	Oxidation (M)	19595.5	18519.2	5866.83	5649.73	26030	16729.6	27609.4	27668.4	1.06:1.00:0.32:0.31:1.41:0.91:1.50:1.50	12407.8	24509.3	0.67:1.33	86607	Metal transporter CNNM4 OS=Homo sapiens OX=9606 GN=CNNM4 PE=1 SV=3
1202	TRUE	Q96AC1|FERM2_HUMAN	2.6	3.68	2	2	Oxidation (M)	812.393	947.081	192.118	159.477	529.467	252.934	190.851	248.299	1.95:2.27:0.46:0.38:1.27:0.61:0.46:0.60	527.767	305.388	1.27:0.73	77861	Fermitin family homolog 2 OS=Homo sapiens OX=9606 GN=FERMT2 PE=1 SV=1
671	TRUE	Q13177|PAK2_HUMAN	3.03	9.54	5	5		2358.49	1650.96	387.631	158.9	617.13	331.429	728.824	220.266	2.92:2.05:0.48:0.20:0.77:0.41:0.90:0.27	1315.22	670.917	1.32:0.68	58043	Serine/threonine-protein kinase PAK 2 OS=Homo sapiens OX=9606 GN=PAK2 PE=1 SV=3
941	TRUE	Q9UMX0|UBQL1_HUMAN	15.02	5.77	3	3		546.217	309.231	143.059	168.822	628.322	545.335	524.824	896.143	1.16:0.66:0.30:0.36:1.34:1.16:1.12:1.91	388.333	699.016	0.71:1.29	62519	Ubiquilin-1 OS=Homo sapiens OX=9606 GN=UBQLN1 PE=1 SV=2
52	TRUE	Q5UIP0|RIF1_HUMAN	1.81	26.17	46	46	Oxidation (M)	22083.1	25761.3	2048.93	1909.44	11954.5	6962.44	9092.34	11402.3	1.94:2.26:0.18:0.17:1.05:0.61:0.80:1.00	13558.3	9900.69	1.16:0.84	274466	Telomere-associated protein RIF1 OS=Homo sapiens OX=9606 GN=RIF1 PE=1 SV=2
499	TRUE	Q8N271|PROM2_HUMAN	28.05	5.16	4	4		92.3078	78.422	207.561	178.356	408.266	649.082	890.142	951.675	0.21:0.18:0.48:0.41:0.95:1.50:2.06:2.20	195.269	724.792	0.42:1.58	91883	Prominin-2 OS=Homo sapiens OX=9606 GN=PROM2 PE=1 SV=1
778	TRUE	P48029|SC6A8_HUMAN	1.3	7.87	4	4		3363.16	2342.38	2030.98	1867.62	2686.76	1133	4307.27	3561.88	1.26:0.88:0.76:0.70:1.01:0.43:1.62:1.34	2401.03	2922.23	0.90:1.10	70523	Sodium- and chloride-dependent creatine transporter 1 OS=Homo sapiens OX=9606 GN=SLC6A8 PE=1 SV=1
474	TRUE	Q9HD67|MYO10_HUMAN	7.94	4.03	6	6	Oxidation (M)	1469.55	1439.05	762.787	1030.85	438.42	1316.72	725.951	685.974	1.49:1.46:0.78:1.05:0.45:1.34:0.74:0.70	1265.45	791.768	1.23:0.77	237347	Unconventional myosin-X OS=Homo sapiens OX=9606 GN=MYO10 PE=1 SV=3
883	TRUE	P61769|B2MG_HUMAN	15.52	35.29	3	3	Carbamidomethylation	23083.6	23919.7	5835.04	6043.71	47317.6	23543.7	50965.7	58513.9	0.77:0.80:0.20:0.20:1.58:0.79:1.70:1.96	14720.5	45085.2	0.49:1.51	13715	Beta-2-microglobulin OS=Homo sapiens OX=9606 GN=B2M PE=1 SV=1
781	TRUE	Q96CX2|KCD12_HUMAN	9.07	10.46	3	3	Oxidation (M)	1250.66	1214.22	1115.51	587.024	594.277	441.809	722.451	942.664	1.46:1.41:1.30:0.68:0.69:0.51:0.84:1.10	1041.85	675.3	1.21:0.79	35701	BTB/POZ domain-containing protein KCTD12 OS=Homo sapiens OX=9606 GN=KCTD12 PE=1 SV=1
33	TRUE	P46940|IQGA1_HUMAN	3.93	42.91	55	53	Acetylation (N-term); Carbamidomethylation; Oxidation (M)	36568.6	37698.7	11005.7	10272.4	33039.7	20283.7	29213.2	30806.6	1.40:1.44:0.42:0.39:1.27:0.78:1.12:1.18	23886.4	28335.8	0.91:1.09	189252	Ras GTPase-activating-like protein IQGAP1 OS=Homo sapiens OX=9606 GN=IQGAP1 PE=1 SV=1
705	TRUE	Q13546|RIPK1_HUMAN	4.43	6.41	3	3		476.561	594.731	1165.11	1219.26	939.245	3415.04	713.585	942.394	0.40:0.50:0.98:1.03:0.79:2.89:0.60:0.80	1001.95	1502.57	0.80:1.20	75931	Receptor-interacting serine/threonine-protein kinase 1 OS=Homo sapiens OX=9606 GN=RIPK1 PE=1 SV=3
633	TRUE	P30511|HLAF_HUMAN	33.16	26.01	6	6		1258.63	1767.5	1539.61	648.506	7622.48	5370.89	6560.7	5428.18	0.33:0.47:0.41:0.17:2.02:1.42:1.74:1.44	1303.56	6245.56	0.35:1.65	39062	HLA class I histocompatibility antigen, alpha chain F OS=Homo sapiens OX=9606 GN=HLA-F PE=1 SV=3
576	TRUE	Q8IXI1|MIRO2_HUMAN	0.43	15.86	7	6	Carbamidomethylation	12015.1	10750.9	1972.11	1907.89	5251.64	3101.01	4742.68	4865.69	2.15:1.93:0.35:0.34:0.94:0.56:0.85:0.87	6840.01	4490.25	1.21:0.79	68118	Mitochondrial Rho GTPase 2 OS=Homo sapiens OX=9606 GN=RHOT2 PE=1 SV=2
327	TRUE	Q13425|SNTB2_HUMAN	5.21	27.22	13	13	Carbamidomethylation; Oxidation (M)	159193	6452.63	1527.16	3764.2	113041	5681.95	46376.3	43592.1	3.35:0.14:0.03:0.08:2.38:0.12:0.98:0.92	42734.2	52172.8	0.90:1.10	57950	Beta-2-syntrophin OS=Homo sapiens OX=9606 GN=SNTB2 PE=1 SV=1
1238	TRUE	Q9Y6M0|TEST_HUMAN	15.63	7.64	2	2		1812.69	2223.76	382.077	514.16	266.099	366.603	113.644	198.59	2.47:3.03:0.52:0.70:0.36:0.50:0.15:0.27	1233.17	273.024	1.64:0.36	34884	Testisin OS=Homo sapiens OX=9606 GN=PRSS21 PE=1 SV=1
87	TRUE	P05556|ITB1_HUMAN	4.06	23.56	23	23	Carbamidomethylation; Oxidation (M)	302891	282482	154563	159187	288394	233808	261627	237567	1.26:1.18:0.64:0.66:1.20:0.97:1.09:0.99	224781	255349	0.94:1.06	88415	Integrin beta-1 OS=Homo sapiens OX=9606 GN=ITGB1 PE=1 SV=2
1209	TRUE	Q15904|VAS1_HUMAN	3.58	5.32	2	2		945.728	1055.43	65.9532	70.4062	777.506	163.779	699.081	948.126	1.60:1.79:0.11:0.12:1.32:0.28:1.18:1.60	858.457	790.178	1.04:0.96	52026	V-type proton ATPase subunit S1 OS=Homo sapiens OX=9606 GN=ATP6AP1 PE=1 SV=2
214	TRUE	P13797|PLST_HUMAN	1.2	27.46	13	13	Acetylation (N-term); Carbamidomethylation; Oxidation (M)	8291.61	7982.97	1506.71	1435.37	4390.4	4650.28	3239.84	4113.76	1.86:1.79:0.34:0.32:0.99:1.04:0.73:0.92	4804.17	4098.57	1.08:0.92	70811	Plastin-3 OS=Homo sapiens OX=9606 GN=PLS3 PE=1 SV=4
920	TRUE	Q13107|UBP4_HUMAN	3	5.4	4	4	Oxidation (M)	2286.63	1841.43	298.344	356.304	670.134	493.511	568.46	510.002	2.60:2.10:0.34:0.41:0.76:0.56:0.65:0.58	1358.97	588.497	1.40:0.60	108565	Ubiquitin carboxyl-terminal hydrolase 4 OS=Homo sapiens OX=9606 GN=USP4 PE=1 SV=3
667	TRUE	Q8NCG7|DGLB_HUMAN	1.47	11.76	6	6	Oxidation (M)	3783.6	3589.65	122.626	199.6	1189.64	158.391	502.382	734.04	2.94:2.79:0.10:0.16:0.93:0.12:0.39:0.57	3306.58	772.749	1.62:0.38	73732	Diacylglycerol lipase-beta OS=Homo sapiens OX=9606 GN=DAGLB PE=1 SV=2
592	TRUE	Q8WWN8|ARAP3_HUMAN	2.97	5.96	7	7	Oxidation (M)	1656.94	1995.54	540.8	481.32	974.829	1455.18	1443.93	1241.7	1.35:1.63:0.44:0.39:0.80:1.19:1.18:1.01	1168.65	1278.91	0.95:1.05	169844	Arf-GAP with Rho-GAP domain, ANK repeat and PH domain-containing protein 3 OS=Homo sapiens OX=9606 GN=ARAP3 PE=1 SV=1
123	TRUE	O95573|ACSL3_HUMAN	5.16	41.11	25	22	Carbamidomethylation; Oxidation (M)	24616.4	26752.7	8941.16	8775.95	22538.8	25561.4	18006.8	20607.6	1.26:1.37:0.46:0.45:1.16:1.31:0.92:1.06	17455.9	21752.3	0.89:1.11	80420	Long-chain-fatty-acid--CoA ligase 3 OS=Homo sapiens OX=9606 GN=ACSL3 PE=1 SV=3
806	TRUE	Q9NVD7|PARVA_HUMAN	5.03	9.95	4	3		1343.1	1592.36	899.827	673.911	1276.53	855.71	2321.52	1852.72	0.99:1.18:0.67:0.50:0.94:0.63:1.72:1.37	1127.3	1576.62	0.83:1.17	42244	Alpha-parvin OS=Homo sapiens OX=9606 GN=PARVA PE=1 SV=1
697	TRUE	P63167|DYL1_HUMAN	0.52	49.44	4	4	Carbamidomethylation; Oxidation (M)	147039	142896	20782.3	20488	82711	47899.8	53676.8	59070	2.05:1.99:0.29:0.29:1.15:0.67:0.75:0.82	82801.4	60839.4	1.15:0.85	10366	Dynein light chain 1, cytoplasmic OS=Homo sapiens OX=9606 GN=DYNLL1 PE=1 SV=1
822	TRUE	Q9H4B6|SAV1_HUMAN	0.46	11.75	3	3		2598.4	2674.96	174.138	148.181	657.363	464.115	655.32	583.124	2.61:2.69:0.18:0.15:0.66:0.47:0.66:0.59	2120.61	692.463	1.51:0.49	44634	Protein salvador homolog 1 OS=Homo sapiens OX=9606 GN=SAV1 PE=1 SV=2
695	TRUE	P60953|CDC42_HUMAN	3.3	31.41	6	6	Carbamidomethylation	3984.58	4969.95	2218.76	2306.84	4474.25	2502.96	4514.48	4302.28	1.09:1.36:0.61:0.63:1.22:0.68:1.23:1.18	3370.03	3948.49	0.92:1.08	21259	Cell division control protein 42 homolog OS=Homo sapiens OX=9606 GN=CDC42 PE=1 SV=2
512	TRUE	Q13421|MSLN_HUMAN	37.15	11.9	8	8		3708.23	3539.28	1600.35	1884.83	19258.8	13323.3	15057.5	16576.4	0.40:0.38:0.17:0.20:2.06:1.42:1.61:1.77	2683.17	16054	0.29:1.71	68986	Mesothelin OS=Homo sapiens OX=9606 GN=MSLN PE=1 SV=2
1022	TRUE	Q8IVF7|FMNL3_HUMAN	10.14	3.5	3	3		1008.39	752.95	328.648	187.603	881.845	1019.63	1023.28	1066.55	1.29:0.96:0.42:0.24:1.13:1.30:1.31:1.36	569.397	997.827	0.73:1.27	117213	Formin-like protein 3 OS=Homo sapiens OX=9606 GN=FMNL3 PE=1 SV=3
1113	TRUE	Q53TN4|CYBR1_HUMAN	24.98	9.79	2	2		723.257	1135.15	1252.96	1149.09	1771.22	2070.3	2885.06	2434.77	0.43:0.68:0.75:0.68:1.06:1.23:1.72:1.45	1160.46	2290.34	0.67:1.33	31641	Cytochrome b reductase 1 OS=Homo sapiens OX=9606 GN=CYBRD1 PE=1 SV=1
944	TRUE	P98196|AT11A_HUMAN	7.63	5.29	4	4		847.66	1114.63	1286.23	501.837	1216.79	560.95	15199	9528.65	0.22:0.29:0.34:0.13:0.32:0.15:4.02:2.52	937.59	6626.34	0.25:1.75	129756	Probable phospholipid-transporting ATPase IH OS=Homo sapiens OX=9606 GN=ATP11A PE=1 SV=3
741	TRUE	Q14165|MLEC_HUMAN	3.46	16.44	4	4		4687.33	4161.4	1057.41	555.633	2706.28	1900.03	3375.03	3830.95	1.68:1.49:0.38:0.20:0.97:0.68:1.21:1.38	2615.44	2953.07	0.94:1.06	32234	Malectin OS=Homo sapiens OX=9606 GN=MLEC PE=1 SV=1
955	TRUE	P09429|HMGB1_HUMAN	2.55	12.09	2	2		4489.08	4742.08	360.348	74.9199	2926.61	1748.24	3379.57	518.621	1.97:2.08:0.16:0.03:1.28:0.77:1.48:0.23	2610.17	2143.26	1.10:0.90	24894	High mobility group protein B1 OS=Homo sapiens OX=9606 GN=HMGB1 PE=1 SV=3
900	TRUE	Q12866|MERTK_HUMAN	7.12	2.5	3	2	Oxidation (M)	415.094	740.239	460.205	347.479	661.821	1989.52	304.8	2639.72	0.44:0.78:0.49:0.37:0.70:2.11:0.32:2.79	529.895	1398.96	0.55:1.45	110249	Tyrosine-protein kinase Mer OS=Homo sapiens OX=9606 GN=MERTK PE=1 SV=2
241	TRUE	Q86UE4|LYRIC_HUMAN	4.9	34.71	14	14	Oxidation (M)	9584.02	9295.34	2099.61	2213.39	9362.31	3437.44	9738.11	11762.3	1.33:1.29:0.29:0.31:1.30:0.48:1.36:1.64	5798.09	8575.03	0.81:1.19	63837	Protein LYRIC OS=Homo sapiens OX=9606 GN=MTDH PE=1 SV=2
1250	TRUE	P24394|IL4RA_HUMAN	4.46	3.27	2	2		892.723	839.513	635.294	189.284	475.342	204.455	455.785	395.666	1.75:1.64:1.24:0.37:0.93:0.40:0.89:0.77	639.204	382.812	1.25:0.75	89658	Interleukin-4 receptor subunit alpha OS=Homo sapiens OX=9606 GN=IL4R PE=1 SV=1
205	TRUE	Q9H2M9|RBGPR_HUMAN	5.66	14	15	15	Oxidation (M)	4450.97	5374.13	555.153	1069.72	5778.16	3328.75	2779.32	4280.42	1.29:1.56:0.16:0.31:1.67:0.96:0.81:1.24	2862.49	4041.66	0.83:1.17	155985	Rab3 GTPase-activating protein non-catalytic subunit OS=Homo sapiens OX=9606 GN=RAB3GAP2 PE=1 SV=1
888	TRUE	Q658P3|STEA3_HUMAN	1.24	9.84	4	4		3693.15	3673.27	1295	796.12	1574.86	1060.67	2285.78	2090.2	1.79:1.78:0.63:0.39:0.77:0.52:1.11:1.02	2364.39	1752.88	1.15:0.85	54601	Metalloreductase STEAP3 OS=Homo sapiens OX=9606 GN=STEAP3 PE=1 SV=2
766	TRUE	O00220|TR10A_HUMAN	5.1	12.39	4	4	Oxidation (M)	8040.32	11152.9	1027.45	1216.78	3620.47	828.147	1305.98	1300.39	2.26:3.13:0.29:0.34:1.02:0.23:0.37:0.37	5359.35	1763.75	1.50:0.50	50089	Tumor necrosis factor receptor superfamily member 10A OS=Homo sapiens OX=9606 GN=TNFRSF10A PE=1 SV=3
116	TRUE	P25705|ATPA_HUMAN	4.35	47.92	26	26	Carbamidomethylation; Oxidation (M)	145366	143397	88493.9	88715.3	131235	90279.5	173059	184996	1.11:1.10:0.68:0.68:1.00:0.69:1.32:1.42	116493	144893	0.89:1.11	59751	ATP synthase subunit alpha, mitochondrial OS=Homo sapiens OX=9606 GN=ATP5F1A PE=1 SV=1
224	TRUE	Q9Y3Z3|SAMH1_HUMAN	20	33.71	16	16	Oxidation (M)	4558.76	3896.78	1466.7	1021.05	13681.1	5650.14	14044.2	16094.3	0.60:0.52:0.19:0.14:1.81:0.75:1.86:2.13	2735.82	12367.4	0.36:1.64	72200	Deoxynucleoside triphosphate triphosphohydrolase SAMHD1 OS=Homo sapiens OX=9606 GN=SAMHD1 PE=1 SV=2
129	TRUE	P05141|ADT2_HUMAN	17.24	19.8	21	11	Carbamidomethylation; Oxidation (M)	178063	171818	197833	196027	253509	270564	282343	194564	0.82:0.79:0.91:0.90:1.16:1.24:1.29:0.89	185936	250245	0.85:1.15	32852	ADP/ATP translocase 2 OS=Homo sapiens OX=9606 GN=SLC25A5 PE=1 SV=7
61	TRUE	P0DMV9|HS71B_HUMAN	4.82	27.3	30	14	Acetylation (N-term); Carbamidomethylation; Oxidation (M)	59963	61372.1	13077.5	13222.4	66155.3	43921	35640.4	43230.9	1.43:1.46:0.31:0.31:1.57:1.04:0.85:1.03	36908.8	47236.9	0.88:1.12	70052	Heat shock 70 kDa protein 1B OS=Homo sapiens OX=9606 GN=HSPA1B PE=1 SV=1
345	TRUE	P28290|ITPI2_HUMAN	0.97	10.8	10	10	Oxidation (M)	7321.37	7533.28	976.272	2065.28	2893.36	1564.17	3507.46	3933.16	1.97:2.02:0.26:0.55:0.78:0.42:0.94:1.06	4505.57	3162.02	1.18:0.82	138386	Protein ITPRID2 OS=Homo sapiens OX=9606 GN=ITPRID2 PE=1 SV=3
21	TRUE	P02751|FINC_HUMAN	15.76	17.92	30	30	Oxidation (M)	21011.1	18799.2	3996.86	3943.41	2728.66	1457.11	2404.82	2248.58	2.97:2.66:0.57:0.56:0.39:0.21:0.34:0.32	11937.6	2248.86	1.68:0.32	272320	Fibronectin OS=Homo sapiens OX=9606 GN=FN1 PE=1 SV=5
861	TRUE	Q9Y5L3|ENTP2_HUMAN	0.27	9.49	3	3	Oxidation (M)	13099.6	12580.9	409.119	363.954	4418.84	341.438	3051.43	3694.14	2.76:2.65:0.09:0.08:0.93:0.07:0.64:0.78	12159.6	2966.39	1.61:0.39	53665	Ectonucleoside triphosphate diphosphohydrolase 2 OS=Homo sapiens OX=9606 GN=ENTPD2 PE=1 SV=1
176	TRUE	O94832|MYO1D_HUMAN	2.27	24.06	20	19	Oxidation (M)	9578.97	9419.09	982.29	898.68	5778.67	3051.61	4751.61	4427	1.97:1.94:0.20:0.18:1.19:0.63:0.98:0.91	5219.76	4502.22	1.07:0.93	116202	Unconventional myosin-Id OS=Homo sapiens OX=9606 GN=MYO1D PE=1 SV=2
321	TRUE	Q13618|CUL3_HUMAN	8.31	15.49	10	10		5469.48	4536.42	2416.94	1639.49	2212.33	2166.99	1199.84	2099.9	2.01:1.67:0.89:0.60:0.81:0.80:0.44:0.77	3515.58	1919.76	1.29:0.71	88930	Cullin-3 OS=Homo sapiens OX=9606 GN=CUL3 PE=1 SV=2
746	TRUE	Q5VZ89|DEN4C_HUMAN	0.07	1.62	3	3		1794.35	1535.93	615.967	571.805	1335.66	767.967	922.454	999.729	1.68:1.44:0.58:0.54:1.25:0.72:0.86:0.94	1129.51	1006.45	1.06:0.94	212711	DENN domain-containing protein 4C OS=Homo sapiens OX=9606 GN=DENND4C PE=1 SV=3
38	TRUE	P14923|PLAK_HUMAN	20.85	55.17	42	36	Acetylation (N-term); Carbamidomethylation; Oxidation (M)	184784	144570	68255.2	69127.6	340516	240275	298580	319380	0.89:0.69:0.33:0.33:1.64:1.15:1.43:1.53	116684	299688	0.56:1.44	81745	Junction plakoglobin OS=Homo sapiens OX=9606 GN=JUP PE=1 SV=3
659	TRUE	Q01844|EWS_HUMAN	2.35	7.62	4	4	Oxidation (M)	64701.1	63255.4	13388.8	12601.8	29424	15263.1	19283.7	25934.7	2.12:2.08:0.44:0.41:0.97:0.50:0.63:0.85	38486.8	22476.4	1.26:0.74	68478	RNA-binding protein EWS OS=Homo sapiens OX=9606 GN=EWSR1 PE=1 SV=1
654	TRUE	P20337|RAB3B_HUMAN	7.62	29.68	5	4	Oxidation (M)	1667	1694.68	513.866	511.559	1964.04	1079.04	1706.92	2069.53	1.19:1.21:0.37:0.37:1.40:0.77:1.22:1.48	1149.21	1704.88	0.81:1.19	24758	Ras-related protein Rab-3B OS=Homo sapiens OX=9606 GN=RAB3B PE=1 SV=2
288	TRUE	P15311|EZRI_HUMAN	2.78	17.41	10	8	Oxidation (M)	6441.47	4408.37	839.332	1145.55	4222.85	2078.86	3977.73	3184.72	1.96:1.34:0.26:0.35:1.28:0.63:1.21:0.97	3208.68	3366.04	0.98:1.02	69413	Ezrin OS=Homo sapiens OX=9606 GN=EZR PE=1 SV=4
331	TRUE	P05067|A4_HUMAN	24.98	15.32	9	9	Oxidation (M)	7619.31	8916.33	4147.97	3644.47	20075.9	13994.2	17496.6	17445.2	0.65:0.76:0.36:0.31:1.72:1.20:1.50:1.50	6082.02	17253	0.52:1.48	86943	Amyloid-beta precursor protein OS=Homo sapiens OX=9606 GN=APP PE=1 SV=3
502	TRUE	Q9BW04|SARG_HUMAN	16.41	17.97	7	7		2906.85	3282.53	384.934	622.444	7743.42	4255.77	8002.6	8179.2	0.66:0.74:0.09:0.14:1.75:0.96:1.81:1.85	1910.07	7045.25	0.43:1.57	63964	Specifically androgen-regulated gene protein OS=Homo sapiens OX=9606 GN=SARG PE=1 SV=2
164	TRUE	P11717|MPRI_HUMAN	17.44	12.24	23	23	Oxidation (M)	3889.2	3709.95	1065.88	1338.1	9149.13	3925.28	12110.4	13908.9	0.63:0.60:0.17:0.22:1.49:0.64:1.97:2.27	2500.78	9773.43	0.41:1.59	274375	Cation-independent mannose-6-phosphate receptor OS=Homo sapiens OX=9606 GN=IGF2R PE=1 SV=3
222	TRUE	Q14118|DAG1_HUMAN	1.51	19.22	15	15	Oxidation (M)	36184.4	35216.5	18342.9	16126.7	29872.4	20638.8	20684.7	20501.5	1.47:1.43:0.74:0.65:1.21:0.84:0.84:0.83	26467.6	22924.4	1.07:0.93	97441	Dystroglycan OS=Homo sapiens OX=9606 GN=DAG1 PE=1 SV=2
167	TRUE	P13010|XRCC5_HUMAN	3.05	41.8	18	18	Oxidation (M)	16240.1	17501.9	1427.63	1490.67	3625	1980.5	2377.35	4279.43	2.66:2.86:0.23:0.24:0.59:0.32:0.39:0.70	9165.06	3065.57	1.50:0.50	82705	X-ray repair cross-complementing protein 5 OS=Homo sapiens OX=9606 GN=XRCC5 PE=1 SV=3
769	TRUE	Q9NPF4|OSGEP_HUMAN	4.44	22.39	5	5	Oxidation (M)	2822.97	2939.54	948.793	879.347	2209.18	1431.25	2755.44	3695.07	1.28:1.33:0.43:0.40:1.00:0.65:1.25:1.67	1897.66	2522.73	0.86:1.14	36427	Probable tRNA N6-adenosine threonylcarbamoyltransferase OS=Homo sapiens OX=9606 GN=OSGEP PE=1 SV=1
309	TRUE	Q15223|NECT1_HUMAN	6.13	32.11	11	11	Carbamidomethylation; Oxidation (M)	51915.6	56873.8	12768.7	7754.98	53270.2	41662.9	41062.5	43528.7	1.34:1.47:0.33:0.20:1.38:1.08:1.06:1.13	32328.3	44881.1	0.84:1.16	57158	Nectin-1 OS=Homo sapiens OX=9606 GN=NECTIN1 PE=1 SV=3
514	TRUE	P20340|RAB6A_HUMAN	5.53	34.13	6	6	Acetylation (N-term); Oxidation (M)	19214.9	17648.7	10872.2	11235.4	20149	10295	23703	32552.6	1.06:0.97:0.60:0.62:1.11:0.57:1.30:1.79	14742.8	21674.9	0.81:1.19	23593	Ras-related protein Rab-6A OS=Homo sapiens OX=9606 GN=RAB6A PE=1 SV=3
805	TRUE	P61006|RAB8A_HUMAN	18.01	12.56	2	2		3004.75	3115.22	2486.94	2427.4	1191.93	2220.49	1846.73	1668.32	1.34:1.39:1.11:1.08:0.53:0.99:0.82:0.74	2758.58	1731.87	1.23:0.77	23668	Ras-related protein Rab-8A OS=Homo sapiens OX=9606 GN=RAB8A PE=1 SV=1
810	TRUE	Q9Y639|NPTN_HUMAN	10.75	12.06	5	5	Oxidation (M)	12114.6	9798.06	4210.88	4808.84	15939	11748.2	13236.5	9804.03	1.19:0.96:0.41:0.47:1.56:1.15:1.30:0.96	7733.1	12681.9	0.76:1.24	44387	Neuroplastin OS=Homo sapiens OX=9606 GN=NPTN PE=1 SV=2
1054	TRUE	P27986|P85A_HUMAN	0.13	5.94	3	3		1038.75	999.092	5313.22	3270.46	778.607	8715.72	1728.09	1706.58	0.35:0.34:1.80:1.11:0.26:2.96:0.59:0.58	2874.45	3232.25	0.94:1.06	83598	Phosphatidylinositol 3-kinase regulatory subunit alpha OS=Homo sapiens OX=9606 GN=PIK3R1 PE=1 SV=2
398	TRUE	O43155|FLRT2_HUMAN	22.02	24.39	11	11	Oxidation (M)	21752.3	22326.1	4506.61	5372.34	2360.65	492.577	867.598	1410.05	2.95:3.02:0.61:0.73:0.32:0.07:0.12:0.19	13489.3	1282.72	1.83:0.17	74049	Leucine-rich repeat transmembrane protein FLRT2 OS=Homo sapiens OX=9606 GN=FLRT2 PE=1 SV=1
617	TRUE	Q13325|IFIT5_HUMAN	44.1	15.15	6	6		1082.8	728.764	982.225	881.135	5431.77	4159.46	4045.2	3134.72	0.42:0.29:0.38:0.34:2.13:1.63:1.58:1.23	1025.23	4448.07	0.37:1.63	55847	Interferon-induced protein with tetratricopeptide repeats 5 OS=Homo sapiens OX=9606 GN=IFIT5 PE=1 SV=1
929	TRUE	Q9UHG3|PCYOX_HUMAN	7.37	6.53	3	3	Oxidation (M)	673.783	1937.11	512.667	555.695	873.292	1414.27	1170.94	2642.3	0.55:1.58:0.42:0.45:0.71:1.16:0.96:2.16	919.814	1525.2	0.75:1.25	56640	Prenylcysteine oxidase 1 OS=Homo sapiens OX=9606 GN=PCYOX1 PE=1 SV=3
399	TRUE	P20591|MX1_HUMAN	70.65	15.56	8	7	Oxidation (M)	0	0	0	0	1236.86	528.761	832.856	484.654	0.00:0.00:0.00:0.00:3.21:1.37:2.16:1.26	0	770.782	0.00:2.00	75520	Interferon-induced GTP-binding protein Mx1 OS=Homo sapiens OX=9606 GN=MX1 PE=1 SV=4
443	TRUE	O00186|STXB3_HUMAN	1.8	10.14	5	5	Oxidation (M)	22609	21345.5	420.668	165.177	43867.5	24727.7	776.526	877.008	1.58:1.49:0.03:0.02:3.06:1.72:0.05:0.06	11324.3	17562.2	0.78:1.22	67764	Syntaxin-binding protein 3 OS=Homo sapiens OX=9606 GN=STXBP3 PE=1 SV=2
652	TRUE	Q9UNN8|EPCR_HUMAN	2.42	20.59	4	4	Carbamidomethylation; Oxidation (M)	130262	132267	36893.3	35365.5	99409.7	89775.8	62879.7	101149	1.51:1.54:0.43:0.41:1.16:1.04:0.73:1.18	83697	88303.5	0.97:1.03	26671	Endothelial protein C receptor OS=Homo sapiens OX=9606 GN=PROCR PE=1 SV=1
666	TRUE	Q9NPQ8|RIC8A_HUMAN	12.34	15.82	6	6	Oxidation (M)	2927.64	2837.56	2162.78	2275.47	2813.06	1134.14	726.396	483.517	1.52:1.48:1.13:1.19:1.47:0.59:0.38:0.25	2550.86	1289.28	1.33:0.67	59710	Synembryn-A OS=Homo sapiens OX=9606 GN=RIC8A PE=1 SV=3
510	TRUE	O15427|MOT4_HUMAN	1.86	17.85	6	6	Oxidation (M)	105107	106408	43663.4	44038.5	94257	68790.6	78641.6	69765.6	1.38:1.39:0.57:0.58:1.23:0.90:1.03:0.91	74804.1	77863.7	0.98:1.02	49469	Monocarboxylate transporter 4 OS=Homo sapiens OX=9606 GN=SLC16A3 PE=1 SV=1
1057	TRUE	P46109|CRKL_HUMAN	0.73	10.56	2	2		1456.4	1921.13	920.533	406.974	533.11	1150.58	1238.45	1962.08	1.22:1.60:0.77:0.34:0.44:0.96:1.03:1.64	1221.17	1243.25	0.99:1.01	33777	Crk-like protein OS=Homo sapiens OX=9606 GN=CRKL PE=1 SV=1
406	TRUE	P84077|ARF1_HUMAN	24.55	31.49	7	4	Oxidation (M)	34557.4	26874.6	25169.8	24438.1	57881.2	37289.6	51134.3	57120.6	0.88:0.68:0.64:0.62:1.47:0.95:1.30:1.45	27760	50856.4	0.71:1.29	20697	ADP-ribosylation factor 1 OS=Homo sapiens OX=9606 GN=ARF1 PE=1 SV=2
379	TRUE	Q96FQ6|S10AG_HUMAN	10.62	64.08	8	8	Oxidation (M)	46512.7	45772.8	19640	16472	51633	52270.9	55784.8	44670.1	1.12:1.10:0.47:0.40:1.24:1.26:1.34:1.07	32099.4	51089.7	0.77:1.23	11801	Protein S100-A16 OS=Homo sapiens OX=9606 GN=S100A16 PE=1 SV=1
469	TRUE	O43278|SPIT1_HUMAN	13.74	17.39	10	10	Carbamidomethylation; Oxidation (M)	29496.7	31480	10697.8	10387.7	50404.5	31492.4	42787.1	41607.3	0.95:1.01:0.34:0.33:1.62:1.01:1.38:1.34	20515.6	41572.8	0.66:1.34	58398	Kunitz-type protease inhibitor 1 OS=Homo sapiens OX=9606 GN=SPINT1 PE=1 SV=2
221	TRUE	Q92888|ARHG1_HUMAN	0.78	17.11	12	12	Oxidation (M)	7162.41	6890.46	806.448	880.746	2500.34	1454.71	1866.08	2980.95	2.33:2.25:0.26:0.29:0.82:0.47:0.61:0.97	3935.02	2200.52	1.28:0.72	102435	Rho guanine nucleotide exchange factor 1 OS=Homo sapiens OX=9606 GN=ARHGEF1 PE=1 SV=2
999	TRUE	Q04771|ACVR1_HUMAN	24.09	6.68	3	3	Oxidation (M)	1358.43	1231.74	1394.72	1493.65	2356.82	2195.93	1973.03	1654.12	0.80:0.72:0.82:0.87:1.38:1.29:1.16:0.97	1369.63	2044.98	0.80:1.20	57153	Activin receptor type-1 OS=Homo sapiens OX=9606 GN=ACVR1 PE=1 SV=1
764	TRUE	Q15691|MARE1_HUMAN	7.22	21.27	5	5		1122.82	1614.67	982.346	860.866	1423.74	1115.45	1446.39	1777.79	0.87:1.25:0.76:0.67:1.10:0.86:1.12:1.37	1145.18	1440.84	0.89:1.11	29999	Microtubule-associated protein RP/EB family member 1 OS=Homo sapiens OX=9606 GN=MAPRE1 PE=1 SV=3
425	TRUE	Q86SJ2|AMGO2_HUMAN	5.59	18.2	9	9	Oxidation (M)	13634.6	14802.1	1664.16	1681.13	3121.17	3015.8	1890.49	1434.43	2.64:2.87:0.32:0.33:0.61:0.58:0.37:0.28	7945.5	2365.47	1.54:0.46	57934	Amphoterin-induced protein 2 OS=Homo sapiens OX=9606 GN=AMIGO2 PE=1 SV=1
292	TRUE	Q8NC51|PAIRB_HUMAN	3.61	37.99	13	13	Oxidation (M)	45014.8	43434.8	4184.8	4281.11	37920.2	18419.4	23148.9	22102	1.81:1.75:0.17:0.17:1.53:0.74:0.93:0.89	24356	25433.8	0.98:1.02	44965	Plasminogen activator inhibitor 1 RNA-binding protein OS=Homo sapiens OX=9606 GN=SERBP1 PE=1 SV=2
848	TRUE	O75251|NDUS7_HUMAN	2.85	19.72	3	3	Oxidation (M)	4501.16	3552.88	984.183	1109.19	3533.4	2126.83	2466.38	2867.75	1.70:1.34:0.37:0.42:1.34:0.80:0.93:1.09	2536.85	2748.59	0.96:1.04	23564	NADH dehydrogenase [ubiquinone] iron-sulfur protein 7, mitochondrial OS=Homo sapiens OX=9606 GN=NDUFS7 PE=1 SV=3
713	TRUE	P22681|CBL_HUMAN	1.95	5.74	4	4	Oxidation (M)	1237.94	1195.83	287.391	255.839	1075.28	319.597	929.591	951.051	1.58:1.53:0.37:0.33:1.38:0.41:1.19:1.22	872.195	846.647	1.01:0.99	99633	E3 ubiquitin-protein ligase CBL OS=Homo sapiens OX=9606 GN=CBL PE=1 SV=2
1187	TRUE	Q9NRD5|PICK1_HUMAN	11.46	5.3	2	2		1997.26	902.297	334.596	401.535	601.936	98.2201	157.986	190.125	3.41:1.54:0.57:0.69:1.03:0.17:0.27:0.32	1090.55	315.461	1.55:0.45	46600	PRKCA-binding protein OS=Homo sapiens OX=9606 GN=PICK1 PE=1 SV=2
121	TRUE	P20020|AT2B1_HUMAN	0.21	12.21	20	10	Carbamidomethylation; Oxidation (M)	4833.8	4152.1	549.033	774.183	4594.83	536.293	2303.7	1788.85	1.98:1.70:0.22:0.32:1.88:0.22:0.94:0.73	2797.81	2305.92	1.10:0.90	134685	Plasma membrane calcium-transporting ATPase 1 OS=Homo sapiens OX=9606 GN=ATP2B1 PE=1 SV=4
12	TRUE	Q8IVF2|AHNK2_HUMAN	29.57	20.97	88	88	Acetylation (N-term); Carbamidomethylation; Oxidation (M)	17072.3	13351.2	18102	10223.4	33875.4	29104.8	42836.8	42099.9	0.66:0.52:0.70:0.40:1.31:1.13:1.66:1.63	14687.2	36979.2	0.57:1.43	616629	Protein AHNAK2 OS=Homo sapiens OX=9606 GN=AHNAK2 PE=1 SV=2
563	TRUE	Q96NE9|FRMD6_HUMAN	0.66	14.47	7	7	Oxidation (M)	4590.24	3794.11	1148.35	991.944	2635.95	1490.33	2575.53	2674.57	1.85:1.53:0.46:0.40:1.06:0.60:1.04:1.08	2631.16	2344.1	1.06:0.94	72044	FERM domain-containing protein 6 OS=Homo sapiens OX=9606 GN=FRMD6 PE=1 SV=1
147	TRUE	Q9Y446|PKP3_HUMAN	17.35	43.16	24	24	Carbamidomethylation; Oxidation (M)	14403.3	15775.2	6486.05	6043.56	23425.1	19603.2	22899.3	23262.3	0.87:0.96:0.39:0.37:1.42:1.19:1.39:1.41	10677	22297.5	0.65:1.35	87082	Plakophilin-3 OS=Homo sapiens OX=9606 GN=PKP3 PE=1 SV=1
750	TRUE	Q9UHQ9|NB5R1_HUMAN	10.72	28.52	6	6	Oxidation (M)	1890.82	1950.3	619.86	698.027	1995.21	1403.21	3978.57	4264.16	0.90:0.93:0.30:0.33:0.95:0.67:1.89:2.03	1420.92	2994.57	0.64:1.36	34095	NADH-cytochrome b5 reductase 1 OS=Homo sapiens OX=9606 GN=CYB5R1 PE=1 SV=1
785	TRUE	Q99996|AKAP9_HUMAN	3.82	1.28	4	4	Oxidation (M)	1495.66	2573.22	458.287	407.569	845.411	267.452	559.231	889.929	1.60:2.75:0.49:0.43:0.90:0.29:0.60:0.95	1584.34	715.277	1.38:0.62	452987	A-kinase anchor protein 9 OS=Homo sapiens OX=9606 GN=AKAP9 PE=1 SV=4
726	TRUE	Q13433|S39A6_HUMAN	0.39	4.24	4	4		4706.44	5968.93	1834.85	1773.51	3057.09	1787.13	3008.33	4698.02	1.40:1.78:0.55:0.53:0.91:0.53:0.90:1.40	3932.9	3137.64	1.11:0.89	85047	Zinc transporter ZIP6 OS=Homo sapiens OX=9606 GN=SLC39A6 PE=1 SV=3
306	TRUE	Q9NZN4|EHD2_HUMAN	15.07	17.13	10	7	Oxidation (M)	1242.78	1289.76	1255.66	705.328	1280.49	2268.35	2047.6	2746.41	0.77:0.80:0.78:0.44:0.80:1.41:1.28:1.71	1123.38	2085.71	0.70:1.30	61161	EH domain-containing protein 2 OS=Homo sapiens OX=9606 GN=EHD2 PE=1 SV=2
243	TRUE	Q9UJZ1|STML2_HUMAN	4.5	49.44	13	13	Oxidation (M)	45536.1	44794.4	8129.96	7940.94	16144.8	9812.45	9068.7	11630.4	2.38:2.34:0.42:0.42:0.84:0.51:0.47:0.61	26600.4	11664.1	1.39:0.61	38534	Stomatin-like protein 2, mitochondrial OS=Homo sapiens OX=9606 GN=STOML2 PE=1 SV=1
896	TRUE	Q969G5|CAVN3_HUMAN	3.31	17.24	4	4	Oxidation (M)	1652.35	1488.7	367.542	295.277	1657.74	610.533	985.321	1268.48	1.59:1.43:0.35:0.28:1.59:0.59:0.95:1.22	950.967	1130.52	0.91:1.09	27701	Caveolae-associated protein 3 OS=Homo sapiens OX=9606 GN=CAVIN3 PE=1 SV=3
83	TRUE	P29323|EPHB2_HUMAN	3.46	26.82	24	18	Carbamidomethylation; Oxidation (M)	39376.1	45150.4	15400.2	15025.1	24133.7	17811.5	19274.4	18650.4	1.62:1.85:0.63:0.62:0.99:0.73:0.79:0.77	28737.9	19967.5	1.18:0.82	117493	Ephrin type-B receptor 2 OS=Homo sapiens OX=9606 GN=EPHB2 PE=1 SV=5
46	TRUE	P53396|ACLY_HUMAN	0.64	46.23	40	40	Carbamidomethylation; Oxidation (M)	127839	131375	15353.7	22886.8	69884.4	49604.7	50752.2	50599.3	1.97:2.03:0.24:0.35:1.08:0.77:0.78:0.78	74363.5	55210.2	1.15:0.85	120839	ATP-citrate synthase OS=Homo sapiens OX=9606 GN=ACLY PE=1 SV=3
152	TRUE	P43490|NAMPT_HUMAN	9.88	51.73	21	21	Carbamidomethylation; Oxidation (M)	68952.6	65315.6	24959	23241.9	20489.7	13173.8	25493.4	27767.3	2.05:1.94:0.74:0.69:0.61:0.39:0.76:0.82	45617.3	21731	1.35:0.65	55521	Nicotinamide phosphoribosyltransferase OS=Homo sapiens OX=9606 GN=NAMPT PE=1 SV=1
371	TRUE	Q9Y5X1|SNX9_HUMAN	11.61	26.72	11	11	Oxidation (M)	5266.53	6012.54	913.624	925.79	8637.24	5136.63	8088.47	8773.4	0.96:1.10:0.17:0.17:1.58:0.94:1.48:1.60	3279.62	7658.94	0.60:1.40	66592	Sorting nexin-9 OS=Homo sapiens OX=9606 GN=SNX9 PE=1 SV=1
524	TRUE	Q9BXS5|AP1M1_HUMAN	4.59	23.17	8	8	Oxidation (M)	9244.56	7863.47	1379.01	1714.41	3026.3	1464.55	2073.97	2248.53	2.55:2.17:0.38:0.47:0.83:0.40:0.57:0.62	5050.36	2203.34	1.39:0.61	48587	AP-1 complex subunit mu-1 OS=Homo sapiens OX=9606 GN=AP1M1 PE=1 SV=3
513	TRUE	P39656|OST48_HUMAN	3.88	20.61	7	7		3865.23	3333.93	1084.47	905.406	2737.88	1250.01	4159.42	4947.3	1.39:1.20:0.39:0.33:0.98:0.45:1.49:1.78	2297.26	3273.65	0.82:1.18	50801	Dolichyl-diphosphooligosaccharide--protein glycosyltransferase 48 kDa subunit OS=Homo sapiens OX=9606 GN=DDOST PE=1 SV=4
568	TRUE	P31431|SDC4_HUMAN	21.91	30.81	6	6	Oxidation (M)	7998.96	10634	3324.7	3186.37	30252.7	13396.8	34082.8	41880.2	0.44:0.59:0.18:0.18:1.67:0.74:1.88:2.31	6831.66	31081.9	0.36:1.64	21642	Syndecan-4 OS=Homo sapiens OX=9606 GN=SDC4 PE=1 SV=2
17	TRUE	Q9NZM1|MYOF_HUMAN	0.57	46.97	80	80	Carbamidomethylation; Oxidation (M)	48049.3	48710.7	8796.77	8799.75	27918.2	11454	25987.9	30876.3	1.83:1.85:0.33:0.33:1.06:0.44:0.99:1.17	28589.1	24059.1	1.09:0.91	234709	Myoferlin OS=Homo sapiens OX=9606 GN=MYOF PE=1 SV=1
757	TRUE	P09758|TACD2_HUMAN	15.31	13.93	5	5		17759.2	17527.1	9554.5	9122.83	20186.8	19267.4	26426.8	32263.7	0.93:0.92:0.50:0.48:1.06:1.01:1.39:1.70	16377.6	24536.2	0.80:1.20	35709	Tumor-associated calcium signal transducer 2 OS=Homo sapiens OX=9606 GN=TACSTD2 PE=1 SV=3
968	TRUE	Q7Z404|TMC4_HUMAN	17.87	6.04	3	3		334.524	426.157	71.7385	75.1892	749.273	1831.32	765.178	749.715	0.53:0.68:0.11:0.12:1.20:2.93:1.22:1.20	363.292	1023.87	0.52:1.48	79208	Transmembrane channel-like protein 4 OS=Homo sapiens OX=9606 GN=TMC4 PE=1 SV=3
898	TRUE	O00273|DFFA_HUMAN	5	16.92	4	4		3341.46	2822.41	448.999	446.741	828.53	621.601	532.81	583.402	2.78:2.35:0.37:0.37:0.69:0.52:0.44:0.48	2394.36	673.119	1.56:0.44	36522	DNA fragmentation factor subunit alpha OS=Homo sapiens OX=9606 GN=DFFA PE=1 SV=1
639	TRUE	P50479|PDLI4_HUMAN	0.55	22.42	6	6	Oxidation (M)	3760.92	3464.46	965.068	904.065	2272.51	1721.64	1875.96	1980.03	1.78:1.64:0.46:0.43:1.07:0.81:0.89:0.93	2273.63	1962.53	1.07:0.93	35398	PDZ and LIM domain protein 4 OS=Homo sapiens OX=9606 GN=PDLIM4 PE=1 SV=2
791	TRUE	Q7KYR7|BT2A1_HUMAN	2.53	11.2	4	4	Oxidation (M)	3042.1	2854.82	356.552	492.882	2007.95	1143.01	1547.59	1804.42	1.84:1.72:0.22:0.30:1.21:0.69:0.93:1.09	1720.56	1706.15	1.00:1.00	59633	Butyrophilin subfamily 2 member A1 OS=Homo sapiens OX=9606 GN=BTN2A1 PE=1 SV=3
438	TRUE	P49757|NUMB_HUMAN	5.18	17.82	9	9	Oxidation (M)	6949.82	4902.38	1577.08	1736.84	6246.72	4523.76	5637.02	3452.17	1.59:1.12:0.36:0.40:1.43:1.03:1.29:0.79	4091.94	4964.92	0.90:1.10	70804	Protein numb homolog OS=Homo sapiens OX=9606 GN=NUMB PE=1 SV=2
449	TRUE	P84085|ARF5_HUMAN	25.88	31.67	7	4	Carbamidomethylation; Oxidation (M)	4525.48	6851.47	4260.58	4921.41	14309.5	9681.96	10878	8640.66	0.57:0.86:0.53:0.61:1.79:1.21:1.36:1.08	5139.73	10877.5	0.64:1.36	20530	ADP-ribosylation factor 5 OS=Homo sapiens OX=9606 GN=ARF5 PE=1 SV=2
77	TRUE	O43795|MYO1B_HUMAN	2.24	38.12	36	33	Carbamidomethylation; Oxidation (M)	95208.1	95797.2	15025.6	16308.9	59266.2	36576.5	53855.9	63388.6	1.75:1.76:0.28:0.30:1.09:0.67:0.99:1.16	58642.8	53271.8	1.05:0.95	131985	Unconventional myosin-Ib OS=Homo sapiens OX=9606 GN=MYO1B PE=1 SV=3
645	TRUE	Q12986|NFX1_HUMAN	28.3	7.5	6	6	Oxidation (M)	3339.36	3166.96	4782.99	4530.15	1071.36	869.695	1936.81	759.195	1.31:1.24:1.87:1.77:0.42:0.34:0.76:0.30	3954.87	1159.26	1.55:0.45	124395	Transcriptional repressor NF-X1 OS=Homo sapiens OX=9606 GN=NFX1 PE=1 SV=2
380	TRUE	P12931|SRC_HUMAN	5.73	23.13	10	8	Oxidation (M)	1614.11	1368.54	1190.23	1052.48	1978.2	844.227	3005.24	2258.89	0.97:0.82:0.72:0.63:1.19:0.51:1.81:1.36	1428.2	2021.64	0.83:1.17	59835	Proto-oncogene tyrosine-protein kinase Src OS=Homo sapiens OX=9606 GN=SRC PE=1 SV=3
45	TRUE	P15144|AMPN_HUMAN	56.16	42.5	47	47	Carbamidomethylation; Oxidation (M)	184621	180953	86896.3	87138.8	1522.63	815.932	1379.01	1621.66	2.71:2.66:1.28:1.28:0.02:0.02:0.02:0.02	134902	1334.81	1.98:0.02	109540	Aminopeptidase N OS=Homo sapiens OX=9606 GN=ANPEP PE=1 SV=4
964	TRUE	P43405|KSYK_HUMAN	5.57	5.51	3	3	Oxidation (M)	1233.12	931.471	2266.02	2077.54	1217.56	314.65	1344.08	1420.06	0.91:0.69:1.68:1.54:0.90:0.23:1.00:1.05	1789.5	1138.99	1.22:0.78	72066	Tyrosine-protein kinase SYK OS=Homo sapiens OX=9606 GN=SYK PE=1 SV=1
928	TRUE	Q14232|EI2BA_HUMAN	1.62	15.08	3	3		824.035	220.638	126.792	159.694	204.897	286.513	330.805	397.806	2.58:0.69:0.40:0.50:0.64:0.90:1.04:1.25	396.896	331.182	1.09:0.91	33712	Translation initiation factor eIF-2B subunit alpha OS=Homo sapiens OX=9606 GN=EIF2B1 PE=1 SV=1
684	TRUE	Q9UP95|S12A4_HUMAN	2.98	3.23	5	3		3039.39	3177.06	123.986	143.678	1442.97	451.984	1710.88	2515.56	1.93:2.02:0.08:0.09:0.92:0.29:1.09:1.60	2830.3	1555.19	1.29:0.71	120650	Solute carrier family 12 member 4 OS=Homo sapiens OX=9606 GN=SLC12A4 PE=1 SV=2
855	TRUE	O95864|FADS2_HUMAN	4.6	11.71	4	4		6359.39	6123.68	814.092	702.303	1203.1	3709.75	320.839	579.598	2.57:2.47:0.33:0.28:0.49:1.50:0.13:0.23	3499.86	1483.26	1.40:0.60	52259	Acyl-CoA 6-desaturase OS=Homo sapiens OX=9606 GN=FADS2 PE=1 SV=1
156	TRUE	Q12965|MYO1E_HUMAN	1.65	20.58	20	19	Carbamidomethylation; Oxidation (M)	10543.4	7610.97	1801.66	1624.75	5708.23	2611.74	5249.67	7468.47	1.98:1.43:0.34:0.30:1.07:0.49:0.99:1.40	5395.2	5259.53	1.01:0.99	127062	Unconventional myosin-Ie OS=Homo sapiens OX=9606 GN=MYO1E PE=1 SV=2
551	TRUE	Q00325|MPCP_HUMAN	0.45	17.4	5	5	Carbamidomethylation	57036.3	53833.9	18029.8	18343.9	34314	29591.8	33106.7	35699.8	1.63:1.54:0.52:0.52:0.98:0.85:0.95:1.02	36811	33178.1	1.05:0.95	40095	Phosphate carrier protein, mitochondrial OS=Homo sapiens OX=9606 GN=SLC25A3 PE=1 SV=2
251	TRUE	P07384|CAN1_HUMAN	6.88	25.77	15	15	Oxidation (M)	15426.4	15167.6	3646.69	3939.7	14922.5	11363.7	14258.8	14113.7	1.33:1.31:0.31:0.34:1.29:0.98:1.23:1.22	9545.1	13664.7	0.82:1.18	81890	Calpain-1 catalytic subunit OS=Homo sapiens OX=9606 GN=CAPN1 PE=1 SV=1
179	TRUE	Q15046|SYK_HUMAN	8.44	39.87	21	21	Carbamidomethylation; Oxidation (M)	13067.8	14088.9	2114.83	2406.91	14142.3	8425.4	16896.6	18638.5	1.16:1.26:0.19:0.21:1.26:0.75:1.51:1.66	7919.63	14525.7	0.71:1.29	68048	Lysine--tRNA ligase OS=Homo sapiens OX=9606 GN=KARS1 PE=1 SV=3
613	TRUE	Q9UBB4|ATX10_HUMAN	5.5	16.63	6	6	Oxidation (M)	3621.03	3692.14	932.966	923.045	1456.17	578.482	1477.11	1087.82	2.10:2.15:0.54:0.54:0.85:0.34:0.86:0.63	2292.3	1149.9	1.33:0.67	53489	Ataxin-10 OS=Homo sapiens OX=9606 GN=ATXN10 PE=1 SV=1
623	TRUE	Q9H9H4|VP37B_HUMAN	11.99	21.05	4	4	Oxidation (M)	1931.79	1713.15	509.719	611.509	3236.28	1313.91	2893.06	3613.72	0.98:0.87:0.26:0.31:1.64:0.66:1.46:1.83	1191.54	2764.24	0.60:1.40	31307	Vacuolar protein sorting-associated protein 37B OS=Homo sapiens OX=9606 GN=VPS37B PE=1 SV=1
108	TRUE	P55196|AFAD_HUMAN	4.82	19.52	27	27	Oxidation (M)	8386.6	8141.91	1242.32	1030.83	5193.55	3732.11	7206.55	8019.31	1.56:1.52:0.23:0.19:0.97:0.70:1.34:1.49	4700.42	6037.88	0.88:1.12	206804	Afadin OS=Homo sapiens OX=9606 GN=AFDN PE=1 SV=3
352	TRUE	P09543|CN37_HUMAN	5.17	30.88	13	13	Oxidation (M)	11218.9	9995.47	1067.96	1681.88	10027.6	4095.97	8440.18	10395.1	1.58:1.40:0.15:0.24:1.41:0.58:1.19:1.46	5991.06	8239.7	0.84:1.16	47579	2',3'-cyclic-nucleotide 3'-phosphodiesterase OS=Homo sapiens OX=9606 GN=CNP PE=1 SV=2
271	TRUE	P50748|KNTC1_HUMAN	0.13	7.79	12	12	Oxidation (M)	2331.01	2565.05	327.622	382.435	1586.17	1058.51	778.22	630.032	1.93:2.12:0.27:0.32:1.31:0.88:0.64:0.52	1932.87	1035.55	1.30:0.70	250749	Kinetochore-associated protein 1 OS=Homo sapiens OX=9606 GN=KNTC1 PE=1 SV=1
826	TRUE	Q9H490|PIGU_HUMAN	6.39	14.02	5	5	Oxidation (M)	4665.01	4894.9	1181.67	1356.43	5004.12	3261.13	4483.85	4146.41	1.29:1.35:0.33:0.37:1.38:0.90:1.24:1.14	3024.5	4223.88	0.83:1.17	50052	Phosphatidylinositol glycan anchor biosynthesis class U protein OS=Homo sapiens OX=9606 GN=PIGU PE=1 SV=3
989	TRUE	Q9UN37|VPS4A_HUMAN	2.1	10.53	3	3		1956.43	1483.09	91.3195	91.0448	278.507	141.368	179.047	518.547	3.30:2.50:0.15:0.15:0.47:0.24:0.30:0.88	1160.4	539.347	1.37:0.63	48898	Vacuolar protein sorting-associated protein 4A OS=Homo sapiens OX=9606 GN=VPS4A PE=1 SV=1
908	TRUE	Q07021|C1QBP_HUMAN	0.74	20.92	4	4	Oxidation (M)	9752.61	10599.6	2845.74	2403.21	5990.99	4969.01	4027.81	8372.2	1.59:1.73:0.46:0.39:0.98:0.81:0.66:1.37	6400.28	5840	1.05:0.95	31362	Complement component 1 Q subcomponent-binding protein, mitochondrial OS=Homo sapiens OX=9606 GN=C1QBP PE=1 SV=1
437	TRUE	P61026|RAB10_HUMAN	9.28	36	7	7		7355.78	6941.11	1526.02	1506.53	7422.67	5962.38	7357.78	10594.7	1.21:1.14:0.25:0.25:1.22:0.98:1.21:1.74	4760.76	7834.39	0.76:1.24	22541	Ras-related protein Rab-10 OS=Homo sapiens OX=9606 GN=RAB10 PE=1 SV=1
1029	TRUE	Q15800|MSMO1_HUMAN	1.46	8.87	2	2	Oxidation (M)	4789.23	3943.98	321.913	944.158	604.277	560.438	1528.94	3414.48	2.38:1.96:0.16:0.47:0.30:0.28:0.76:1.70	2499.82	1527.03	1.24:0.76	35216	Methylsterol monooxygenase 1 OS=Homo sapiens OX=9606 GN=MSMO1 PE=1 SV=1
195	TRUE	Q9HCU4|CELR2_HUMAN	7.95	8.48	16	15	Oxidation (M)	1690.09	1552.21	813.323	7041.85	3811.88	3260.35	16698.2	3410.45	0.35:0.32:0.17:1.47:0.80:0.68:3.49:0.71	2774.37	6795.21	0.58:1.42	317452	Cadherin EGF LAG seven-pass G-type receptor 2 OS=Homo sapiens OX=9606 GN=CELSR2 PE=1 SV=1
1027	TRUE	O43663|PRC1_HUMAN	5.69	6.45	3	3	Oxidation (M)	419.618	503.939	82.0429	118.085	385.584	375.677	318.306	407.839	1.29:1.54:0.25:0.36:1.18:1.15:0.98:1.25	307.578	371.851	0.91:1.09	71607	Protein regulator of cytokinesis 1 OS=Homo sapiens OX=9606 GN=PRC1 PE=1 SV=2
918	TRUE	P05187|PPB1_HUMAN	22.39	7.66	3	3		265.286	227.956	159.665	176.835	552.863	364.156	1223.3	791.08	0.56:0.48:0.34:0.38:1.18:0.77:2.60:1.68	269.913	732.851	0.54:1.46	57954	Alkaline phosphatase, placental type OS=Homo sapiens OX=9606 GN=ALPP PE=1 SV=2
714	TRUE	P50443|S26A2_HUMAN	0.87	10.15	5	5	Oxidation (M)	1865.36	1377.56	331.843	480.792	781.106	624.474	911.671	615.395	2.14:1.58:0.38:0.55:0.89:0.71:1.04:0.70	1561.55	733.161	1.36:0.64	81662	Sulfate transporter OS=Homo sapiens OX=9606 GN=SLC26A2 PE=1 SV=2
554	TRUE	Q9Y6G9|DC1L1_HUMAN	4.3	18.74	7	7		10399.3	10418.3	972.813	1369.05	6245.86	730.619	1504.53	967.64	2.55:2.56:0.24:0.34:1.53:0.18:0.37:0.24	6332.95	2438.67	1.44:0.56	56579	Cytoplasmic dynein 1 light intermediate chain 1 OS=Homo sapiens OX=9606 GN=DYNC1LI1 PE=1 SV=3
1082	TRUE	Q9HB21|PKHA1_HUMAN	8.67	6.68	2	2	Oxidation (M)	195.377	304.101	53.1812	61.3385	306.223	113.972	494.948	508.891	0.77:1.19:0.21:0.24:1.20:0.45:1.94:2.00	219.45	406.139	0.70:1.30	45553	Pleckstrin homology domain-containing family A member 1 OS=Homo sapiens OX=9606 GN=PLEKHA1 PE=1 SV=2
800	TRUE	Q02750|MP2K1_HUMAN	5.31	12.47	5	4	Oxidation (M)	1941.45	2594.11	368.74	220.371	2011.62	1348.38	1740.25	1460.99	1.33:1.78:0.25:0.15:1.38:0.92:1.19:1.00	1826.85	1696.37	1.04:0.96	43439	Dual specificity mitogen-activated protein kinase kinase 1 OS=Homo sapiens OX=9606 GN=MAP2K1 PE=1 SV=2
475	TRUE	P51151|RAB9A_HUMAN	10.14	49.25	9	7	Oxidation (M)	6659.1	6028.53	1230.21	1434.86	7360.52	4630.79	9386.56	10101.2	1.14:1.03:0.21:0.25:1.26:0.79:1.60:1.73	3838.17	7869.76	0.66:1.34	22838	Ras-related protein Rab-9A OS=Homo sapiens OX=9606 GN=RAB9A PE=1 SV=1
188	TRUE	Q9H223|EHD4_HUMAN	0.72	29.94	17	13	Oxidation (M)	14471.5	9493.97	4271.04	3836.45	6269.25	6888.53	8975.12	7568.69	1.87:1.23:0.55:0.50:0.81:0.89:1.16:0.98	8018.24	7425.4	1.04:0.96	61175	EH domain-containing protein 4 OS=Homo sapiens OX=9606 GN=EHD4 PE=1 SV=1
333	TRUE	Q14BN4|SLMAP_HUMAN	1.93	14.37	10	10		3075.41	4588.73	2281.93	2307.81	1033.35	6590.09	3522.44	1231.61	1.00:1.49:0.74:0.75:0.34:2.14:1.14:0.40	3063.47	3094.37	0.99:1.01	95198	Sarcolemmal membrane-associated protein OS=Homo sapiens OX=9606 GN=SLMAP PE=1 SV=1
84	TRUE	P27824|CALX_HUMAN	6.77	40.2	25	25	Oxidation (M)	51306.8	91760.9	57577.8	58957.3	92079.7	81163.9	55767.6	123025	0.67:1.20:0.75:0.77:1.20:1.06:0.73:1.61	64900.7	88009	0.85:1.15	67568	Calnexin OS=Homo sapiens OX=9606 GN=CANX PE=1 SV=2
698	TRUE	P29992|GNA11_HUMAN	4.47	11.14	5	3		1312.35	1346.62	463.206	398.321	816.706	731.434	1385.96	1938.42	1.25:1.28:0.44:0.38:0.78:0.70:1.32:1.85	880.126	1218.13	0.84:1.16	42123	Guanine nucleotide-binding protein subunit alpha-11 OS=Homo sapiens OX=9606 GN=GNA11 PE=1 SV=2
105	TRUE	Q00341|VIGLN_HUMAN	0.32	25.79	25	25	Acetylation (N-term); Oxidation (M)	10860.4	10966	16619.3	16881	36500	5318.51	19014.7	7665.54	0.70:0.71:1.07:1.09:2.36:0.34:1.23:0.50	13831.7	17124.7	0.89:1.11	141456	Vigilin OS=Homo sapiens OX=9606 GN=HDLBP PE=1 SV=2
370	TRUE	Q93100|KPBB_HUMAN	6.4	10.8	10	10		4220.4	3972.2	942.058	670.681	989.118	816.432	1245.35	760.168	2.48:2.33:0.55:0.39:0.58:0.48:0.73:0.45	2451.33	952.766	1.44:0.56	124884	Phosphorylase b kinase regulatory subunit beta OS=Homo sapiens OX=9606 GN=PHKB PE=1 SV=3
511	TRUE	O15111|IKKA_HUMAN	14.48	10.34	6	6	Oxidation (M)	2508.71	2424.63	767.861	996.16	3956.81	2706.55	3348.53	3996.49	0.97:0.94:0.30:0.38:1.53:1.05:1.29:1.54	1674.34	3502.09	0.65:1.35	84640	Inhibitor of nuclear factor kappa-B kinase subunit alpha OS=Homo sapiens OX=9606 GN=CHUK PE=1 SV=2
26	TRUE	O60437|PEPL_HUMAN	28.28	46.07	69	69	Carbamidomethylation; Oxidation (M)	3274.24	2788.56	809.4	2447.81	18338.5	9417.81	14211.2	16888.2	0.38:0.33:0.09:0.29:2.15:1.11:1.67:1.98	2398.21	14713.9	0.28:1.72	204747	Periplakin OS=Homo sapiens OX=9606 GN=PPL PE=1 SV=4
174	TRUE	Q7L1W4|LRC8D_HUMAN	4.09	27.62	19	19	Carbamidomethylation; Oxidation (M)	14283.5	14170.8	2545.32	2779.27	11966.3	6475.84	10718.6	11182.5	1.54:1.53:0.27:0.30:1.29:0.70:1.16:1.21	8444.72	10085.8	0.91:1.09	98201	Volume-regulated anion channel subunit LRRC8D OS=Homo sapiens OX=9606 GN=LRRC8D PE=1 SV=1
281	TRUE	P17655|CAN2_HUMAN	1	25.86	11	11	Oxidation (M)	10673.2	9424.53	1956.05	1766.73	10636.3	4283.92	3457.06	4014.44	1.85:1.63:0.34:0.31:1.84:0.74:0.60:0.69	5955.14	5597.93	1.03:0.97	79995	Calpain-2 catalytic subunit OS=Homo sapiens OX=9606 GN=CAPN2 PE=1 SV=6
975	TRUE	Q8N4X5|AF1L2_HUMAN	4.02	5.62	3	3		1328.61	1846.03	168.122	211.685	1540.27	421.624	1174.17	1394.69	1.31:1.83:0.17:0.21:1.52:0.42:1.16:1.38	1296.42	1205.33	1.04:0.96	91300	Actin filament-associated protein 1-like 2 OS=Homo sapiens OX=9606 GN=AFAP1L2 PE=1 SV=1
478	TRUE	Q8TD43|TRPM4_HUMAN	5.95	2.31	2	2		2090.35	1529.15	297.597	321.775	279.383	317.081	513.934	461.311	2.88:2.11:0.41:0.44:0.38:0.44:0.71:0.64	1059.72	392.928	1.46:0.54	134301	Transient receptor potential cation channel subfamily M member 4 OS=Homo sapiens OX=9606 GN=TRPM4 PE=1 SV=1
655	TRUE	P04156|PRIO_HUMAN	4.37	17.79	5	5	Carbamidomethylation; Oxidation (M)	22598.1	16133	863.556	1048.59	6772.14	2273.63	494.525	702.607	3.55:2.54:0.14:0.16:1.06:0.36:0.08:0.11	14739.5	2681.92	1.69:0.31	27661	Major prion protein OS=Homo sapiens OX=9606 GN=PRNP PE=1 SV=1
27	TRUE	O75691|UTP20_HUMAN	2.4	26.39	56	56	Acetylation (N-term); Carbamidomethylation; Oxidation (M)	15072.9	15834	2065.88	1384.33	6020.25	2315.67	2959.01	3348.86	2.46:2.59:0.34:0.23:0.98:0.38:0.48:0.55	8589.28	3660.94	1.40:0.60	318385	Small subunit processome component 20 homolog OS=Homo sapiens OX=9606 GN=UTP20 PE=1 SV=3
884	TRUE	P84095|RHOG_HUMAN	8.56	25.65	3	3	Carbamidomethylation	2602.91	2040.36	836.096	1350.01	4795.01	2123.9	1747.16	3358.51	1.10:0.87:0.35:0.57:2.03:0.90:0.74:1.43	1707.34	3006.15	0.72:1.28	21308	Rho-related GTP-binding protein RhoG OS=Homo sapiens OX=9606 GN=RHOG PE=1 SV=1
801	TRUE	Q8IZH2|XRN1_HUMAN	6.63	3.11	4	4	Oxidation (M)	2220.03	1977.63	819.032	30438.7	1304.9	342.953	1155.23	1832.08	0.44:0.39:0.16:6.07:0.26:0.07:0.23:0.37	8863.85	1158.79	1.77:0.23	194107	5'-3' exoribonuclease 1 OS=Homo sapiens OX=9606 GN=XRN1 PE=1 SV=1
470	TRUE	Q9H9J2|RM44_HUMAN	1.93	28.31	8	8	Carbamidomethylation; Oxidation (M)	5042.1	5185.22	800.906	769.208	1984.35	1183.38	1839.05	1251.31	2.23:2.30:0.35:0.34:0.88:0.52:0.81:0.55	3020.39	1564.52	1.32:0.68	37535	39S ribosomal protein L44, mitochondrial OS=Homo sapiens OX=9606 GN=MRPL44 PE=1 SV=1
608	TRUE	P05026|AT1B1_HUMAN	2.19	37.95	8	8	Carbamidomethylation; Oxidation (M)	68848.3	65790	17846.9	24609.3	48388.8	28218.8	55196.2	61208	1.49:1.42:0.39:0.53:1.05:0.61:1.19:1.32	44273.6	48252.9	0.96:1.04	35061	Sodium/potassium-transporting ATPase subunit beta-1 OS=Homo sapiens OX=9606 GN=ATP1B1 PE=1 SV=1
903	TRUE	P07602|SAP_HUMAN	28.45	9.73	4	4	Oxidation (M)	1192.21	1208.62	623.077	577.757	4020.68	2484.58	5850.38	6535.94	0.42:0.43:0.22:0.21:1.43:0.88:2.08:2.32	934.092	4722.89	0.33:1.67	58113	Prosaposin OS=Homo sapiens OX=9606 GN=PSAP PE=1 SV=2
405	TRUE	P20339|RAB5A_HUMAN	1.25	27.44	7	4	Oxidation (M)	2449.09	6319.01	1021.37	859.773	1381.25	1173.86	982.717	4047.75	1.07:2.77:0.45:0.38:0.61:0.51:0.43:1.78	2662.31	1896.39	1.17:0.83	23659	Ras-related protein Rab-5A OS=Homo sapiens OX=9606 GN=RAB5A PE=1 SV=2
570	TRUE	Q93052|LPP_HUMAN	6.14	22.06	8	8	Oxidation (M)	5193.62	4241.02	773.584	620.125	6270.2	1752.73	3870.89	6667.03	1.41:1.15:0.21:0.17:1.71:0.48:1.05:1.81	2707.09	4640.22	0.74:1.26	65746	Lipoma-preferred partner OS=Homo sapiens OX=9606 GN=LPP PE=1 SV=1
272	TRUE	Q9NPH3|IL1AP_HUMAN	15.02	31.05	15	15	Oxidation (M)	7822.21	6840.82	5799.3	4185.93	16353	11128.4	10910.8	7211.82	0.89:0.78:0.66:0.48:1.86:1.27:1.24:0.82	6162.07	11401	0.70:1.30	65418	Interleukin-1 receptor accessory protein OS=Homo sapiens OX=9606 GN=IL1RAP PE=1 SV=2
277	TRUE	Q6NZI2|CAVN1_HUMAN	14.34	34.87	13	13	Oxidation (M)	27951.1	26449.1	8237.83	8081.58	38756	28361.1	45922.3	51827.9	0.95:0.90:0.28:0.27:1.32:0.96:1.56:1.76	17679.9	41216.8	0.60:1.40	43476	Caveolae-associated protein 1 OS=Homo sapiens OX=9606 GN=CAVIN1 PE=1 SV=1
346	TRUE	Q03135|CAV1_HUMAN	1.72	47.75	11	11	Carbamidomethylation	169349	169856	39461.9	45339.4	129187	75583.1	100001	110645	1.61:1.62:0.38:0.43:1.23:0.72:0.95:1.05	106002	103854	1.01:0.99	20472	Caveolin-1 OS=Homo sapiens OX=9606 GN=CAV1 PE=1 SV=4
597	TRUE	Q96EP0|RNF31_HUMAN	1.49	8.49	7	7		4108.58	4218.74	838.417	682.54	4288.43	835.681	3055.3	2341.76	1.61:1.66:0.33:0.27:1.68:0.33:1.20:0.92	2462.07	2630.29	0.97:1.03	119652	E3 ubiquitin-protein ligase RNF31 OS=Homo sapiens OX=9606 GN=RNF31 PE=1 SV=1
680	TRUE	P62987|RL40_HUMAN	5.86	31.25	4	4		236990	243501	52837.1	54818.2	294498	193417	161961	172385	1.34:1.38:0.30:0.31:1.67:1.10:0.92:0.98	147036	205565	0.83:1.17	14728	Ubiquitin-60S ribosomal protein L40 OS=Homo sapiens OX=9606 GN=UBA52 PE=1 SV=2
1005	TRUE	Q9BYI3|HYCCI_HUMAN	0.19	10.56	3	3	Oxidation (M)	1436.25	1660.11	286.47	362.753	671.174	483.377	718.364	1187.29	1.69:1.95:0.34:0.43:0.79:0.57:0.84:1.40	1268.82	877.093	1.18:0.82	57625	Hyccin OS=Homo sapiens OX=9606 GN=FAM126A PE=1 SV=2
285	TRUE	Q8WX93|PALLD_HUMAN	12.79	9.76	11	11	Carbamidomethylation; Oxidation (M)	4320.16	5619.33	968.414	1659.55	897.64	862.848	728.489	1178.74	2.13:2.77:0.48:0.82:0.44:0.43:0.36:0.58	3141.86	916.929	1.55:0.45	150564	Palladin OS=Homo sapiens OX=9606 GN=PALLD PE=1 SV=3
1013	TRUE	P49755|TMEDA_HUMAN	4.6	14.61	3	3	Oxidation (M)	5047.95	3093.8	988.273	998.944	3857.23	1321.69	5591.44	4556.3	1.59:0.97:0.31:0.31:1.21:0.42:1.76:1.43	2614.55	3921.38	0.80:1.20	24976	Transmembrane emp24 domain-containing protein 10 OS=Homo sapiens OX=9606 GN=TMED10 PE=1 SV=2
75	TRUE	O95425|SVIL_HUMAN	12.92	20.51	32	32	Carbamidomethylation; Oxidation (M)	10117.7	9064.49	3580.75	4776.19	1950.51	1437.06	3675.28	4421.94	2.07:1.86:0.73:0.98:0.40:0.29:0.75:0.91	6884.78	2871.19	1.41:0.59	247746	Supervillin OS=Homo sapiens OX=9606 GN=SVIL PE=1 SV=2
875	TRUE	Q8TAD4|ZNT5_HUMAN	14.86	4.18	2	2		489.47	502.415	0	0	115.059	0	139.67	250.241	2.62:2.69:0.00:0.00:0.61:0.00:0.75:1.34	495.942	196.238	1.43:0.57	84046	Zinc transporter 5 OS=Homo sapiens OX=9606 GN=SLC30A5 PE=1 SV=1
959	TRUE	Q14244|MAP7_HUMAN	7.91	4.67	3	3	Acetylation (N-term)	957.101	1131.26	185.782	215	1896.93	1640.34	887.111	550.084	1.03:1.21:0.20:0.23:2.03:1.76:0.95:0.59	1052.42	1556.04	0.81:1.19	84052	Ensconsin OS=Homo sapiens OX=9606 GN=MAP7 PE=1 SV=1
326	TRUE	P98172|EFNB1_HUMAN	0.44	34.68	12	11	Carbamidomethylation; Oxidation (M)	70497.2	71845.9	29453.2	30556.8	62033.8	37705.1	45098.5	37571.5	1.47:1.49:0.61:0.64:1.29:0.78:0.94:0.78	50588.3	45602.2	1.05:0.95	38007	Ephrin-B1 OS=Homo sapiens OX=9606 GN=EFNB1 PE=1 SV=1
433	TRUE	Q9NP72|RAB18_HUMAN	2.27	49.51	9	8	Carbamidomethylation; Oxidation (M)	16859.2	17917.1	7111.52	6534.25	14887.7	10212.1	15348.7	11548.3	1.34:1.43:0.57:0.52:1.19:0.81:1.22:0.92	12105.5	12999.2	0.96:1.04	22977	Ras-related protein Rab-18 OS=Homo sapiens OX=9606 GN=RAB18 PE=1 SV=1
86	TRUE	P06733|ENOA_HUMAN	7.25	55.07	22	20	Oxidation (M)	105011	98968.3	39686.4	37029.2	42921.9	37870.3	36652.7	46344.7	1.89:1.78:0.71:0.67:0.77:0.68:0.66:0.83	70173.7	40947.4	1.26:0.74	47169	Alpha-enolase OS=Homo sapiens OX=9606 GN=ENO1 PE=1 SV=2
905	TRUE	Q04760|LGUL_HUMAN	0.83	20.65	4	4	Oxidation (M)	4185.83	4016.15	829.543	752.541	2906.87	1652.09	1607.58	829.194	2.00:1.91:0.40:0.36:1.39:0.79:0.77:0.40	2446.02	1748.93	1.17:0.83	20778	Lactoylglutathione lyase OS=Homo sapiens OX=9606 GN=GLO1 PE=1 SV=4
605	TRUE	Q9Y653|AGRG1_HUMAN	9.15	10.25	6	6		4197.84	4316.07	1558.77	2506.1	4461.29	3083.02	6643.95	7520.2	0.98:1.01:0.36:0.58:1.04:0.72:1.55:1.75	3180.7	5453.1	0.74:1.26	77738	Adhesion G-protein coupled receptor G1 OS=Homo sapiens OX=9606 GN=ADGRG1 PE=1 SV=2
1018	TRUE	Q9Y4D7|PLXD1_HUMAN	19.49	1.4	3	2		213.979	255.663	121.263	229.856	394.596	389.11	325.297	368.202	0.74:0.89:0.42:0.80:1.37:1.35:1.13:1.28	238.874	369.301	0.79:1.21	212007	Plexin-D1 OS=Homo sapiens OX=9606 GN=PLXND1 PE=1 SV=3
343	TRUE	Q05397|FAK1_HUMAN	10.84	13.31	11	11	Acetylation (N-term); Oxidation (M)	6656.76	8002.26	7105.92	6165.97	4842.46	1271.76	6709.21	2550.95	1.23:1.48:1.31:1.14:0.89:0.23:1.24:0.47	6982.73	3843.59	1.29:0.71	119233	Focal adhesion kinase 1 OS=Homo sapiens OX=9606 GN=PTK2 PE=1 SV=2
58	TRUE	P11142|HSP7C_HUMAN	1.58	36.07	36	20	Carbamidomethylation; Oxidation (M)	224585	217613	60809.1	62671.5	173741	119135	125471	133517	1.61:1.56:0.44:0.45:1.24:0.85:0.90:0.96	141420	137966	1.01:0.99	70898	Heat shock cognate 71 kDa protein OS=Homo sapiens OX=9606 GN=HSPA8 PE=1 SV=1
163	TRUE	Q96A65|EXOC4_HUMAN	1.41	27.52	21	21	Oxidation (M)	4241.5	5730.17	1462.82	46119.1	5778.32	46186	4764.5	4964.97	0.28:0.38:0.10:3.09:0.39:3.10:0.32:0.33	14488	15466.4	0.97:1.03	110498	Exocyst complex component 4 OS=Homo sapiens OX=9606 GN=EXOC4 PE=1 SV=1
393	TRUE	P48960|AGRE5_HUMAN	2.54	18.08	10	10	Oxidation (M)	31548.9	31674.1	4180.33	5359.95	11570.1	8021.51	5486.64	10530.8	2.33:2.34:0.31:0.40:0.85:0.59:0.41:0.78	18190.8	8902.28	1.34:0.66	91869	Adhesion G protein-coupled receptor E5 OS=Homo sapiens OX=9606 GN=ADGRE5 PE=1 SV=4
581	TRUE	Q15286|RAB35_HUMAN	6.05	17.41	4	3	Oxidation (M)	5131.68	5403.86	1552.67	1386.79	4183.42	2738.77	6442.11	7411.46	1.20:1.26:0.36:0.32:0.98:0.64:1.50:1.73	3368.75	5193.94	0.79:1.21	23025	Ras-related protein Rab-35 OS=Homo sapiens OX=9606 GN=RAB35 PE=1 SV=1
329	TRUE	Q9C0B5|ZDHC5_HUMAN	8.5	29.51	13	13	Oxidation (M)	9418.08	7653.67	2819.76	1349.8	8023.51	7086.15	11008.9	10159.1	1.31:1.06:0.39:0.19:1.12:0.99:1.53:1.41	5310.33	9069.41	0.74:1.26	77545	Palmitoyltransferase ZDHHC5 OS=Homo sapiens OX=9606 GN=ZDHHC5 PE=1 SV=2
538	TRUE	P51153|RAB13_HUMAN	19.96	33.99	5	5	Oxidation (M)	6184.56	11285.5	4049.28	3285.99	18983.3	15428	12511.8	17877.9	0.55:1.01:0.36:0.29:1.69:1.38:1.12:1.60	6201.34	16200.2	0.55:1.45	22774	Ras-related protein Rab-13 OS=Homo sapiens OX=9606 GN=RAB13 PE=1 SV=1
387	TRUE	Q9BTU6|P4K2A_HUMAN	7.74	25.26	10	10	Oxidation (M)	3566.56	3559.58	2281.63	1299.52	4116.95	1821.52	10123.1	9264.78	0.79:0.79:0.51:0.29:0.91:0.40:2.25:2.06	2676.82	6331.59	0.59:1.41	54022	Phosphatidylinositol 4-kinase type 2-alpha OS=Homo sapiens OX=9606 GN=PI4K2A PE=1 SV=1
139	TRUE	P27816|MAP4_HUMAN	0.3	28.91	25	25	Oxidation (M)	26437.1	25703.4	8096.48	7407.39	18498.2	12060.5	12541	12818.6	1.71:1.66:0.52:0.48:1.20:0.78:0.81:0.83	16911.1	13979.6	1.09:0.91	121005	Microtubule-associated protein 4 OS=Homo sapiens OX=9606 GN=MAP4 PE=1 SV=3
643	TRUE	Q13873|BMPR2_HUMAN	17.58	8.67	6	6	Oxidation (M)	573.889	745.01	329.524	334.651	1017.65	812.449	1168.25	847.02	0.79:1.02:0.45:0.46:1.40:1.12:1.60:1.16	672.791	1016.6	0.80:1.20	115201	Bone morphogenetic protein receptor type-2 OS=Homo sapiens OX=9606 GN=BMPR2 PE=1 SV=2
626	TRUE	P29350|PTN6_HUMAN	10.58	11.93	5	5		814.08	622.088	264.853	119.401	1046.83	901.7	614.277	1145.14	1.18:0.90:0.38:0.17:1.51:1.30:0.89:1.66	643.749	926.986	0.82:1.18	67561	Tyrosine-protein phosphatase non-receptor type 6 OS=Homo sapiens OX=9606 GN=PTPN6 PE=1 SV=1
471	TRUE	P29966|MARCS_HUMAN	7.28	44.58	8	8		1690.08	2297.76	0	0	1791.03	628.403	212.558	877.591	1.80:2.45:0.00:0.00:1.91:0.67:0.23:0.94	1993.92	1071.14	1.30:0.70	31555	Myristoylated alanine-rich C-kinase substrate OS=Homo sapiens OX=9606 GN=MARCKS PE=1 SV=4
10	TRUE	P16144|ITB4_HUMAN	43.98	50.66	98	98	Carbamidomethylation; Oxidation (M)	122329	80643.1	64565.2	68828.1	562079	395817	595279	619922	0.39:0.26:0.21:0.22:1.79:1.26:1.90:1.98	84091.4	543274	0.27:1.73	202167	Integrin beta-4 OS=Homo sapiens OX=9606 GN=ITGB4 PE=1 SV=5
211	TRUE	Q6P179|ERAP2_HUMAN	22.45	23.65	19	19	Oxidation (M)	1447.4	1606.66	2573.99	2254.18	5171.93	3056.16	5990.51	7643.07	0.39:0.43:0.69:0.61:1.39:0.82:1.61:2.06	1970.56	5465.42	0.53:1.47	110462	Endoplasmic reticulum aminopeptidase 2 OS=Homo sapiens OX=9606 GN=ERAP2 PE=1 SV=2
200	TRUE	Q14247|SRC8_HUMAN	2.7	39.27	19	19	Carbamidomethylation; Oxidation (M)	16064.2	14810.3	2884.99	2867.28	14800.5	9381.54	6314.39	8675.63	1.70:1.56:0.30:0.30:1.56:0.99:0.67:0.92	9156.7	9793.02	0.97:1.03	61586	Src substrate cortactin OS=Homo sapiens OX=9606 GN=CTTN PE=1 SV=2
869	TRUE	O15120|PLCB_HUMAN	4.44	16.55	4	4	Oxidation (M)	2293.4	2923.85	2449.9	1039.72	1818.56	1831.66	1743.25	995.612	1.22:1.55:1.30:0.55:0.96:0.97:0.92:0.53	2176.72	1597.27	1.15:0.85	30914	1-acyl-sn-glycerol-3-phosphate acyltransferase beta OS=Homo sapiens OX=9606 GN=AGPAT2 PE=1 SV=1
347	TRUE	O15439|MRP4_HUMAN	9.09	9.96	11	11	Oxidation (M)	3438.24	3516.9	2970.15	3104.01	3220.3	2003.05	1673.51	3111.82	1.19:1.22:1.03:1.08:1.12:0.70:0.58:1.08	3257.33	2502.17	1.13:0.87	149527	Multidrug resistance-associated protein 4 OS=Homo sapiens OX=9606 GN=ABCC4 PE=1 SV=3
170	TRUE	O43157|PLXB1_HUMAN	6.21	12.74	20	19	Carbamidomethylation; Oxidation (M)	2024.34	5752.46	708.985	1781.7	3692.16	2153.16	4514.22	4633.34	0.64:1.82:0.22:0.56:1.17:0.68:1.43:1.47	2566.87	3748.22	0.81:1.19	232298	Plexin-B1 OS=Homo sapiens OX=9606 GN=PLXNB1 PE=1 SV=3
73	TRUE	O60716|CTND1_HUMAN	8.31	47.21	36	36	Carbamidomethylation; Oxidation (M)	45988.5	43371.5	13415.6	14350.3	45481.6	37465.7	50983.8	43448.6	1.25:1.18:0.36:0.39:1.24:1.02:1.38:1.18	29456.7	44344.9	0.80:1.20	108170	Catenin delta-1 OS=Homo sapiens OX=9606 GN=CTNND1 PE=1 SV=1
391	TRUE	P54578|UBP14_HUMAN	2.63	30.77	11	11	Oxidation (M)	11107.1	12485.2	749.856	733.204	2895.27	1356.18	1717.54	1396.95	2.74:3.08:0.18:0.18:0.71:0.33:0.42:0.34	7971.79	1841.48	1.62:0.38	56069	Ubiquitin carboxyl-terminal hydrolase 14 OS=Homo sapiens OX=9606 GN=USP14 PE=1 SV=3
253	TRUE	Q9UHR4|BI2L1_HUMAN	3.33	36.59	15	15	Oxidation (M)	29468.6	30604.6	5401.58	4645.72	24583.6	11630.5	24496.7	17842.3	1.59:1.65:0.29:0.25:1.32:0.63:1.32:0.96	17530.1	19638.3	0.94:1.06	56883	Brain-specific angiogenesis inhibitor 1-associated protein 2-like protein 1 OS=Homo sapiens OX=9606 GN=BAIAP2L1 PE=1 SV=2
355	TRUE	Q96PD2|DCBD2_HUMAN	3.16	18.71	11	11	Oxidation (M)	28608.8	33483.2	4439.59	4376.04	13224	5032.94	5781.35	7956.66	2.22:2.60:0.35:0.34:1.03:0.39:0.45:0.62	17726.9	7998.73	1.38:0.62	85035	Discoidin, CUB and LCCL domain-containing protein 2 OS=Homo sapiens OX=9606 GN=DCBLD2 PE=1 SV=1
662	TRUE	Q9Y289|SC5A6_HUMAN	0.04	9.76	5	5	Oxidation (M)	12630	14517.5	2798.04	3136.04	10325.5	4452.41	5256.73	6503.82	1.69:1.95:0.38:0.42:1.39:0.60:0.71:0.87	8270.4	6634.61	1.11:0.89	68642	Sodium-dependent multivitamin transporter OS=Homo sapiens OX=9606 GN=SLC5A6 PE=2 SV=2
161	TRUE	P63010|AP2B1_HUMAN	1.56	24.01	18	18	Carbamidomethylation; Oxidation (M)	22494.3	21677.7	2557.64	2890.63	11114.2	7409.53	9737.41	12197.2	2.00:1.93:0.23:0.26:0.99:0.66:0.86:1.08	12405.1	10114.6	1.10:0.90	104553	AP-2 complex subunit beta OS=Homo sapiens OX=9606 GN=AP2B1 PE=1 SV=1
338	TRUE	O14672|ADA10_HUMAN	20.38	12.83	7	7	Oxidation (M)	27913.6	26761.1	12258.3	11369.2	51463.7	35047.8	62216	67566.5	0.76:0.73:0.33:0.31:1.40:0.95:1.69:1.83	19575.5	54073.5	0.53:1.47	84142	Disintegrin and metalloproteinase domain-containing protein 10 OS=Homo sapiens OX=9606 GN=ADAM10 PE=1 SV=1
709	TRUE	P09493|TPM1_HUMAN	1.38	12.32	5	5	Oxidation (M)	10520.8	12222.3	2991.98	3086.82	8346.63	5753.18	6892.43	6344.96	1.50:1.74:0.43:0.44:1.19:0.82:0.98:0.90	7205.48	6834.3	1.03:0.97	32709	Tropomyosin alpha-1 chain OS=Homo sapiens OX=9606 GN=TPM1 PE=1 SV=2
542	TRUE	Q9ULF5|S39AA_HUMAN	2.75	14.2	9	9	Carbamidomethylation	29552	29384.3	8855.24	9628.07	14009.4	9011.17	14187.6	15930.4	1.81:1.80:0.54:0.59:0.86:0.55:0.87:0.98	19637.8	13347.7	1.19:0.81	94132	Zinc transporter ZIP10 OS=Homo sapiens OX=9606 GN=SLC39A10 PE=1 SV=2
772	TRUE	P78504|JAG1_HUMAN	22.5	2.79	3	3		6912.19	6271.47	2194.55	2302.39	896.009	799.572	1291.51	953.009	2.56:2.32:0.81:0.85:0.33:0.30:0.48:0.35	4420.15	985.025	1.64:0.36	133799	Protein jagged-1 OS=Homo sapiens OX=9606 GN=JAG1 PE=1 SV=3
868	TRUE	P21926|CD9_HUMAN	39.18	8.33	3	3		5357.33	3983.12	5632.52	5528.21	17443.4	13912.3	25155.6	19617.7	0.44:0.33:0.47:0.46:1.44:1.15:2.08:1.62	5651.11	19265.2	0.45:1.55	25416	CD9 antigen OS=Homo sapiens OX=9606 GN=CD9 PE=1 SV=4
412	TRUE	Q9HD26|GOPC_HUMAN	32.89	28.14	10	10	Carbamidomethylation	2454.45	2298.88	2961.6	2419.66	4088.5	5418.32	5066.77	4134.36	0.68:0.64:0.82:0.67:1.13:1.50:1.41:1.15	2533.65	4676.99	0.70:1.30	50520	Golgi-associated PDZ and coiled-coil motif-containing protein OS=Homo sapiens OX=9606 GN=GOPC PE=1 SV=1
203	TRUE	Q14574|DSC3_HUMAN	12.45	16.29	13	12	Oxidation (M)	5305.54	5893.18	1708.54	1236.79	8196.84	5432.95	7794.41	9042.04	0.95:1.06:0.31:0.22:1.47:0.97:1.40:1.62	3536.01	7616.56	0.63:1.37	99969	Desmocollin-3 OS=Homo sapiens OX=9606 GN=DSC3 PE=1 SV=3
223	TRUE	Q92859|NEO1_HUMAN	42.14	11.23	12	12	Oxidation (M)	976.79	1251.48	825.639	845.775	5617.4	3171.27	4881.3	4514.47	0.35:0.45:0.30:0.31:2.03:1.15:1.77:1.64	974.92	4546.11	0.35:1.65	160017	Neogenin OS=Homo sapiens OX=9606 GN=NEO1 PE=1 SV=2
812	TRUE	Q99829|CPNE1_HUMAN	3.15	11.73	5	5		4014.12	3771.98	1118.8	927.622	4204.7	2203.68	2209.31	2663.13	1.52:1.43:0.42:0.35:1.59:0.83:0.84:1.01	2458.13	2820.2	0.93:1.07	59059	Copine-1 OS=Homo sapiens OX=9606 GN=CPNE1 PE=1 SV=1
315	TRUE	Q02978|M2OM_HUMAN	3.43	45.54	10	10	Acetylation (N-term); Oxidation (M)	26705.3	27394.6	4036.66	5131.36	20817.5	11162.3	18297.7	19896.1	1.60:1.64:0.24:0.31:1.25:0.67:1.10:1.19	18148.2	17543.4	1.02:0.98	34062	Mitochondrial 2-oxoglutarate/malate carrier protein OS=Homo sapiens OX=9606 GN=SLC25A11 PE=1 SV=3
447	TRUE	P40189|IL6RB_HUMAN	9.75	6.75	6	6		1751.12	1923.8	1993.54	2099.76	2974.52	2186.81	2308.49	1956.99	0.81:0.90:0.93:0.98:1.38:1.02:1.07:0.91	1942.05	2356.7	0.90:1.10	103537	Interleukin-6 receptor subunit beta OS=Homo sapiens OX=9606 GN=IL6ST PE=1 SV=2
81	TRUE	P07355|ANXA2_HUMAN	1.54	62.54	29	29	Acetylation (N-term); Carbamidomethylation; Oxidation (M)	228076	228029	62725.5	63064.1	192871	112436	125549	141539	1.58:1.58:0.43:0.44:1.34:0.78:0.87:0.98	145474	143099	1.01:0.99	38604	Annexin A2 OS=Homo sapiens OX=9606 GN=ANXA2 PE=1 SV=2
715	TRUE	Q12923|PTN13_HUMAN	11.07	2.58	5	5		3159.73	2690.67	993.864	1069.14	847.738	455.773	856.526	1227.19	2.24:1.90:0.70:0.76:0.60:0.32:0.61:0.87	2101.03	886.223	1.41:0.59	276906	Tyrosine-protein phosphatase non-receptor type 13 OS=Homo sapiens OX=9606 GN=PTPN13 PE=1 SV=2
588	TRUE	P51617|IRAK1_HUMAN	9.82	10.96	6	6		844.957	1050.83	564.258	404.023	1186.56	831.313	1049.04	3188.12	0.74:0.92:0.50:0.35:1.04:0.73:0.92:2.80	907.542	1563.76	0.73:1.27	76537	Interleukin-1 receptor-associated kinase 1 OS=Homo sapiens OX=9606 GN=IRAK1 PE=1 SV=2
1099	TRUE	P41240|CSK_HUMAN	5.61	6	2	2	Oxidation (M)	1291.47	4289.1	534.699	816.278	652.736	743.154	401.734	1135.57	1.05:3.48:0.43:0.66:0.53:0.60:0.33:0.92	1732.89	733.298	1.41:0.59	50704	Tyrosine-protein kinase CSK OS=Homo sapiens OX=9606 GN=CSK PE=1 SV=1
192	TRUE	Q9Y2A7|NCKP1_HUMAN	6.25	17.46	16	16	Oxidation (M)	8093.4	10404.2	1631.18	5109.26	11371.3	5822.42	10129.1	10420.7	1.03:1.32:0.21:0.65:1.44:0.74:1.29:1.32	6309.52	9435.89	0.80:1.20	128790	Nck-associated protein 1 OS=Homo sapiens OX=9606 GN=NCKAP1 PE=1 SV=1
559	TRUE	Q06787|FMR1_HUMAN	5.91	9.65	5	5		3588.63	2739.37	1910.85	1636.22	2225.18	3213.87	3282.69	3746.43	1.28:0.98:0.68:0.59:0.80:1.15:1.18:1.34	2468.77	3117.04	0.88:1.12	71174	Synaptic functional regulator FMR1 OS=Homo sapiens OX=9606 GN=FMR1 PE=1 SV=1
7	TRUE	P35579|MYH9_HUMAN	10.5	45.36	94	84	Carbamidomethylation; Oxidation (M)	119139	119293	14944.1	15344.3	16854.5	10027.4	10531.2	13311.8	2.98:2.99:0.37:0.38:0.42:0.25:0.26:0.33	67180	12681.2	1.68:0.32	226532	Myosin-9 OS=Homo sapiens OX=9606 GN=MYH9 PE=1 SV=4
819	TRUE	Q9Y696|CLIC4_HUMAN	0.44	17.79	5	4	Oxidation (M)	1280.25	1834.33	209.943	257.627	953.86	338.341	805.107	659.311	1.62:2.32:0.26:0.33:1.20:0.43:1.02:0.83	1090.84	831.088	1.14:0.86	28772	Chloride intracellular channel protein 4 OS=Homo sapiens OX=9606 GN=CLIC4 PE=1 SV=4
569	TRUE	P57735|RAB25_HUMAN	3.36	45.54	8	8	Oxidation (M)	17017.7	13252.8	2572.57	3097.83	11682	5558.45	11549.3	12409.2	1.76:1.37:0.27:0.32:1.21:0.58:1.20:1.29	8985.25	10299.7	0.93:1.07	23496	Ras-related protein Rab-25 OS=Homo sapiens OX=9606 GN=RAB25 PE=1 SV=2
85	TRUE	Q03001|DYST_HUMAN	13.35	5.01	33	30	Carbamidomethylation; Oxidation (M)	11182	10328	3459.44	3357.92	1874.99	1039.27	1409.1	4673.01	2.40:2.21:0.74:0.72:0.40:0.22:0.30:1.00	7081.86	2249.09	1.52:0.48	860662	Dystonin OS=Homo sapiens OX=9606 GN=DST PE=1 SV=4
92	TRUE	O15020|SPTN2_HUMAN	0.09	13.47	28	21	Oxidation (M)	5230.76	4432.02	674.182	767.167	2767.45	864.152	1861.61	2520.14	2.19:1.85:0.28:0.32:1.16:0.36:0.78:1.05	2776.03	2003.34	1.16:0.84	271325	Spectrin beta chain, non-erythrocytic 2 OS=Homo sapiens OX=9606 GN=SPTBN2 PE=1 SV=3
804	TRUE	P30626|SORCN_HUMAN	1.48	27.27	5	5	Oxidation (M)	4546.4	4344.04	640.56	881.319	2195.55	1006.59	1575.88	1376.46	2.20:2.10:0.31:0.43:1.06:0.49:0.76:0.66	3040.73	1538.62	1.33:0.67	21676	Sorcin OS=Homo sapiens OX=9606 GN=SRI PE=1 SV=1
351	TRUE	Q92552|RT27_HUMAN	6.02	27.78	9	9	Carbamidomethylation; Oxidation (M)	13875	14262.9	15835.3	2441.79	6625.04	4207.53	4873	5455.94	1.64:1.69:1.87:0.29:0.78:0.50:0.58:0.65	11603.7	5290.38	1.37:0.63	47611	28S ribosomal protein S27, mitochondrial OS=Homo sapiens OX=9606 GN=MRPS27 PE=1 SV=3
589	TRUE	Q5ZPR3|CD276_HUMAN	2.81	23.03	8	8	Carbamidomethylation	40367.1	39132.8	6995.1	7350.54	20455.9	11612.3	9047.46	8970.43	2.24:2.18:0.39:0.41:1.14:0.65:0.50:0.50	23461.4	12521.5	1.30:0.70	57235	CD276 antigen OS=Homo sapiens OX=9606 GN=CD276 PE=1 SV=1
55	TRUE	Q8WXH0|SYNE2_HUMAN	15.76	7.6	42	42	Oxidation (M)	2307.57	2459	1088.51	1128.31	3588.25	2700.12	4492.29	2935.47	0.89:0.95:0.42:0.44:1.39:1.04:1.74:1.13	1745.85	3429.03	0.67:1.33	796442	Nesprin-2 OS=Homo sapiens OX=9606 GN=SYNE2 PE=1 SV=3
792	TRUE	O60503|ADCY9_HUMAN	9.76	3.99	4	4		818.791	769.512	0	0	535.529	171.73	265.949	518.125	2.13:2.00:0.00:0.00:1.39:0.45:0.69:1.35	794.151	438.644	1.29:0.71	150701	Adenylate cyclase type 9 OS=Homo sapiens OX=9606 GN=ADCY9 PE=1 SV=4
240	TRUE	P48634|PRC2A_HUMAN	5.55	8.25	14	14		9374.93	8913.76	2555.34	2614.96	10340.8	5555.84	7561.23	8098.29	1.36:1.30:0.37:0.38:1.50:0.81:1.10:1.18	5864.75	7889.04	0.85:1.15	228863	Protein PRRC2A OS=Homo sapiens OX=9606 GN=PRRC2A PE=1 SV=3
604	TRUE	O00291|HIP1_HUMAN	1.8	5.69	5	4	Oxidation (M)	2203.18	1457.1	178.191	165.251	1455.21	327.769	1035.59	768.036	2.32:1.54:0.19:0.17:1.53:0.35:1.09:0.81	1351.78	1018.21	1.14:0.86	116221	Huntingtin-interacting protein 1 OS=Homo sapiens OX=9606 GN=HIP1 PE=1 SV=5
300	TRUE	Q96NY8|NECT4_HUMAN	12.81	31.76	12	12	Oxidation (M)	2221.21	8833.14	1012.79	1049.71	12094.6	3951.93	9318.69	11307.3	0.36:1.42:0.16:0.17:1.94:0.63:1.50:1.82	3279.21	9168.13	0.53:1.47	55454	Nectin-4 OS=Homo sapiens OX=9606 GN=NECTIN4 PE=1 SV=1
335	TRUE	P21709|EPHA1_HUMAN	6.16	18.75	12	12	Oxidation (M)	10782.4	11754.2	10390.7	10051.2	4758.45	3213.09	4740.35	21051.7	1.12:1.23:1.08:1.05:0.50:0.33:0.49:2.19	10744.6	8440.89	1.12:0.88	108127	Ephrin type-A receptor 1 OS=Homo sapiens OX=9606 GN=EPHA1 PE=1 SV=4
1084	TRUE	Q96KC8|DNJC1_HUMAN	3.99	6.68	3	3		2081.26	1954.1	59.4766	65.5508	1141.75	350.258	999.499	1881.04	1.95:1.83:0.06:0.06:1.07:0.33:0.94:1.76	1481.84	1093.14	1.15:0.85	63883	DnaJ homolog subfamily C member 1 OS=Homo sapiens OX=9606 GN=DNAJC1 PE=1 SV=1
1180	TRUE	O00192|ARVC_HUMAN	2.05	3.12	2	2		914.318	1230.18	703.158	632.377	933.83	734.383	461.463	985.99	1.11:1.49:0.85:0.77:1.13:0.89:0.56:1.20	870.008	778.917	1.06:0.94	104642	Armadillo repeat protein deleted in velo-cardio-facial syndrome OS=Homo sapiens OX=9606 GN=ARVCF PE=1 SV=1
948	TRUE	Q6PCB8|EMB_HUMAN	8.08	13.76	3	3		4371.58	4291.34	8423.93	8235.34	7453.58	8793.65	7702.72	9163.91	0.60:0.59:1.15:1.13:1.02:1.20:1.05:1.25	6330.55	8278.47	0.87:1.13	36881	Embigin OS=Homo sapiens OX=9606 GN=EMB PE=1 SV=1
155	TRUE	Q07065|CKAP4_HUMAN	4.24	39.53	18	18	Oxidation (M)	11131.9	11416.1	2424.69	2437.24	10943.7	4933.36	8342.14	10369.7	1.44:1.47:0.31:0.31:1.41:0.64:1.08:1.34	6852.48	8647.23	0.88:1.12	66022	Cytoskeleton-associated protein 4 OS=Homo sapiens OX=9606 GN=CKAP4 PE=1 SV=2
580	TRUE	Q86YS7|C2CD5_HUMAN	5.47	4.5	4	4	Oxidation (M)	2312.79	2182.61	925.972	950.19	2433.53	1185.04	2559.67	2691.17	1.21:1.15:0.49:0.50:1.28:0.62:1.34:1.41	1592.89	2217.35	0.84:1.16	110447	C2 domain-containing protein 5 OS=Homo sapiens OX=9606 GN=C2CD5 PE=1 SV=1
960	TRUE	P20645|MPRD_HUMAN	0.6	12.64	3	3	Carbamidomethylation	12270.1	12470.6	615.422	587.871	11651.4	9519.88	951.525	1103.58	2.00:2.03:0.10:0.10:1.90:1.55:0.15:0.18	6486	5806.6	1.06:0.94	30993	Cation-dependent mannose-6-phosphate receptor OS=Homo sapiens OX=9606 GN=M6PR PE=1 SV=1
350	TRUE	Q96QT4|TRPM7_HUMAN	4.09	8.58	11	11	Oxidation (M)	1486.45	1400.54	222.862	244.826	1463.3	743.158	850.145	928.594	1.62:1.53:0.24:0.27:1.59:0.81:0.93:1.01	838.669	996.3	0.91:1.09	212697	Transient receptor potential cation channel subfamily M member 7 OS=Homo sapiens OX=9606 GN=TRPM7 PE=1 SV=1
577	TRUE	Q99805|TM9S2_HUMAN	6.83	14.18	7	7	Carbamidomethylation; Oxidation (M)	1802.77	4039.88	2121.3	2254.95	6209.53	1696.06	4190.31	5419.21	0.52:1.17:0.61:0.65:1.79:0.49:1.21:1.56	2554.72	4378.78	0.74:1.26	75776	Transmembrane 9 superfamily member 2 OS=Homo sapiens OX=9606 GN=TM9SF2 PE=1 SV=1
873	TRUE	P41440|S19A1_HUMAN	7.51	7.45	3	3		2219.73	2240.39	410.1	309.307	738.052	472.485	240.112	154.75	2.62:2.64:0.48:0.36:0.87:0.56:0.28:0.18	1514.94	419.259	1.57:0.43	64868	Reduced folate transporter OS=Homo sapiens OX=9606 GN=SLC19A1 PE=1 SV=3
1266	TRUE	Q8IUW5|RELL1_HUMAN	10.39	16.24	2	2	Oxidation (M)	633.56	443.686	67.1091	123.497	701.35	388.666	821.269	976.458	1.22:0.85:0.13:0.24:1.35:0.75:1.58:1.88	377.307	721.936	0.69:1.31	29340	RELT-like protein 1 OS=Homo sapiens OX=9606 GN=RELL1 PE=1 SV=1
98	TRUE	P23634|AT2B4_HUMAN	22.28	17.08	26	16	Carbamidomethylation; Oxidation (M)	5146.67	5384.19	1491.85	1267.48	19610.8	9210.56	19015.4	22294.1	0.49:0.52:0.14:0.12:1.88:0.88:1.82:2.14	3322.55	17532.7	0.32:1.68	137920	Plasma membrane calcium-transporting ATPase 4 OS=Homo sapiens OX=9606 GN=ATP2B4 PE=1 SV=2
122	TRUE	P52597|HNRPF_HUMAN	4.03	54.46	20	20	Acetylation (N-term); Carbamidomethylation; Oxidation (M)	318015	320490	81201.7	82319.1	249083	156600	249741	327937	1.42:1.44:0.36:0.37:1.12:0.70:1.12:1.47	200506	245840	0.90:1.10	45672	Heterogeneous nuclear ribonucleoprotein F OS=Homo sapiens OX=9606 GN=HNRNPF PE=1 SV=3
616	TRUE	Q15654|TRIP6_HUMAN	0.35	25.42	7	7		10991.1	10957.9	1444.99	803.151	7237.5	2016.62	2594.63	2748.16	2.27:2.26:0.30:0.17:1.49:0.42:0.54:0.57	6049.28	3649.23	1.25:0.75	50288	Thyroid receptor-interacting protein 6 OS=Homo sapiens OX=9606 GN=TRIP6 PE=1 SV=3
13	TRUE	P21333|FLNA_HUMAN	5.74	46.51	96	88	Carbamidomethylation; Oxidation (M)	119575	120774	17428.1	17847.2	31001.5	14739.6	21874	26634.4	2.59:2.61:0.38:0.39:0.67:0.32:0.47:0.58	68906.1	23562.4	1.49:0.51	280739	Filamin-A OS=Homo sapiens OX=9606 GN=FLNA PE=1 SV=4
877	TRUE	Q14678|KANK1_HUMAN	19.32	3.62	3	3		660.904	903.818	548.489	0	254.225	0	84.7107	151.601	2.03:2.78:1.69:0.00:0.78:0.00:0.26:0.47	842.025	186.898	1.64:0.36	147289	KN motif and ankyrin repeat domain-containing protein 1 OS=Homo sapiens OX=9606 GN=KANK1 PE=1 SV=3
4	TRUE	O75369|FLNB_HUMAN	14.74	59.45	133	123	Carbamidomethylation; Oxidation (M)	191257	180936	23174.8	23230.2	13039.8	8239.51	10151.8	18062	3.27:3.09:0.40:0.40:0.22:0.14:0.17:0.31	104649	12373.3	1.79:0.21	278164	Filamin-B OS=Homo sapiens OX=9606 GN=FLNB PE=1 SV=2
165	TRUE	P07996|TSP1_HUMAN	3.06	20.6	21	21	Oxidation (M)	71460.4	75682.9	13920.2	13618.3	28371.9	19427.8	22031.9	20191	2.16:2.29:0.42:0.41:0.86:0.59:0.67:0.61	43670.4	22505.6	1.32:0.68	129383	Thrombospondin-1 OS=Homo sapiens OX=9606 GN=THBS1 PE=1 SV=2
91	TRUE	Q13740|CD166_HUMAN	11.45	37.91	26	26	Carbamidomethylation; Oxidation (M)	220314	193003	96501.9	95388	68788	57754.9	100858	99092.2	1.89:1.66:0.83:0.82:0.59:0.50:0.87:0.85	151302	81623.2	1.30:0.70	65102	CD166 antigen OS=Homo sapiens OX=9606 GN=ALCAM PE=1 SV=2
833	TRUE	P23508|CRCM_HUMAN	7.16	7	4	4		960.188	797.949	845.378	606.038	1120.75	606.941	1466.38	1630.03	0.96:0.79:0.84:0.60:1.12:0.60:1.46:1.62	864.203	1206.02	0.83:1.17	93027	Colorectal mutant cancer protein OS=Homo sapiens OX=9606 GN=MCC PE=1 SV=2
441	TRUE	Q9H5Y7|SLIK6_HUMAN	15.5	14.74	8	8	Oxidation (M)	7877.53	6039.68	1848.34	5453.25	1484.4	2919.64	1027.64	1097.58	2.27:1.74:0.53:1.57:0.43:0.84:0.30:0.32	5304.7	1655.19	1.52:0.48	95110	SLIT and NTRK-like protein 6 OS=Homo sapiens OX=9606 GN=SLITRK6 PE=2 SV=3
486	TRUE	P22059|OSBP1_HUMAN	2.51	14.75	9	9	Carbamidomethylation; Oxidation (M)	10529.8	2496.97	945.738	2700.87	1849.82	14071.4	1680.6	9444.26	1.93:0.46:0.17:0.49:0.34:2.57:0.31:1.73	4168.34	6761.51	0.76:1.24	89421	Oxysterol-binding protein 1 OS=Homo sapiens OX=9606 GN=OSBP PE=1 SV=1
249	TRUE	Q68CP9|ARID2_HUMAN	12.55	10.84	15	15	Oxidation (M)	3750.66	3570.7	55570.9	57997.9	1971.87	1558.12	3470.81	1868.65	0.23:0.22:3.43:3.58:0.12:0.10:0.21:0.12	30222.6	2217.36	1.86:0.14	197391	AT-rich interactive domain-containing protein 2 OS=Homo sapiens OX=9606 GN=ARID2 PE=1 SV=2
385	TRUE	P13861|KAP2_HUMAN	0.8	34.16	10	10	Oxidation (M)	4128.2	3141.2	1427.09	1456.78	3421.47	952.689	2181.6	2688.06	1.70:1.30:0.59:0.60:1.41:0.39:0.90:1.11	2538.31	2310.95	1.05:0.95	45518	cAMP-dependent protein kinase type II-alpha regulatory subunit OS=Homo sapiens OX=9606 GN=PRKAR2A PE=1 SV=2
847	TRUE	P17302|CXA1_HUMAN	15.83	12.83	3	3	Oxidation (M)	224.92	389.192	0	0	110.484	0	55.0002	67.4429	2.12:3.68:0.00:0.00:1.04:0.00:0.52:0.64	307.056	112.431	1.46:0.54	43008	Gap junction alpha-1 protein OS=Homo sapiens OX=9606 GN=GJA1 PE=1 SV=2
628	TRUE	Q05655|KPCD_HUMAN	9.76	7.69	4	4	Oxidation (M)	4122.12	4355.06	981.347	877.167	935.588	718.564	1187.67	534.714	2.40:2.54:0.57:0.51:0.55:0.42:0.69:0.31	2583.92	899.479	1.48:0.52	77505	Protein kinase C delta type OS=Homo sapiens OX=9606 GN=PRKCD PE=1 SV=2
151	TRUE	P50895|BCAM_HUMAN	48.4	43.31	19	19	Carbamidomethylation; Oxidation (M)	6284.67	6467.29	7507.38	8640.72	74940.1	54824.6	106945	121939	0.13:0.13:0.15:0.18:1.55:1.13:2.21:2.52	7225.01	89662.3	0.15:1.85	67405	Basal cell adhesion molecule OS=Homo sapiens OX=9606 GN=BCAM PE=1 SV=2
482	TRUE	P51572|BAP31_HUMAN	4.13	28.86	6	6	Oxidation (M)	6795.47	6365.48	681.111	598.019	6324.36	1361	4671.86	8153.04	1.56:1.46:0.16:0.14:1.45:0.31:1.07:1.87	3610.02	5187.91	0.82:1.18	27992	B-cell receptor-associated protein 31 OS=Homo sapiens OX=9606 GN=BCAP31 PE=1 SV=3
216	TRUE	A0FGR8|ESYT2_HUMAN	1.62	26.17	16	16	Oxidation (M)	8823.88	8321.53	2266.01	1484.49	3337.1	2408.86	3675.3	3818.09	2.07:1.95:0.53:0.35:0.78:0.56:0.86:0.89	5223.98	3309.84	1.22:0.78	102357	Extended synaptotagmin-2 OS=Homo sapiens OX=9606 GN=ESYT2 PE=1 SV=1
552	TRUE	Q13636|RAB31_HUMAN	11.82	37.63	6	5	Oxidation (M)	4653.77	4365.73	1949.37	1930.56	1789.48	1784.03	1210.87	1849.98	1.91:1.79:0.80:0.79:0.73:0.73:0.50:0.76	3224.86	1658.59	1.32:0.68	21569	Ras-related protein Rab-31 OS=Homo sapiens OX=9606 GN=RAB31 PE=1 SV=1
135	TRUE	P53675|CLH2_HUMAN	2.42	4.82	20	5	Carbamidomethylation	7876.56	8058.71	1045.4	1008.88	3638.29	4073.01	4378.58	4238.98	1.84:1.88:0.24:0.24:0.85:0.95:1.02:0.99	4797.93	4136.78	1.07:0.93	187030	Clathrin heavy chain 2 OS=Homo sapiens OX=9606 GN=CLTCL1 PE=1 SV=2
328	TRUE	P17931|LEG3_HUMAN	5.36	32	11	10	Oxidation (M)	83126.1	76739.8	18966.6	16062.3	68135.3	32685.5	90936.7	101385	1.36:1.26:0.31:0.26:1.12:0.54:1.49:1.66	48723.7	73285.6	0.80:1.20	26152	Galectin-3 OS=Homo sapiens OX=9606 GN=LGALS3 PE=1 SV=5
242	TRUE	Q4KMQ2|ANO6_HUMAN	3.73	18.57	13	13	Oxidation (M)	6616.11	6448.28	1482.7	1413.9	3746.2	3091.51	6236.2	6217.6	1.50:1.46:0.34:0.32:0.85:0.70:1.42:1.41	3990.25	4822.88	0.91:1.09	106165	Anoctamin-6 OS=Homo sapiens OX=9606 GN=ANO6 PE=1 SV=2
957	TRUE	Q9H444|CHM4B_HUMAN	1.45	15.62	3	3		2063.71	1506.34	916.104	791.081	2655.34	853.386	1208.62	1350.63	1.46:1.06:0.65:0.56:1.87:0.60:0.85:0.95	1319.31	1516.99	0.93:1.07	24950	Charged multivesicular body protein 4b OS=Homo sapiens OX=9606 GN=CHMP4B PE=1 SV=1
233	TRUE	P68400|CSK21_HUMAN	8	46.04	15	14	Carbamidomethylation; Oxidation (M)	64562	65563.7	20040	19268.9	74640.5	37455.6	81946.7	95836.9	1.12:1.14:0.35:0.34:1.30:0.65:1.43:1.67	42358.7	72469.9	0.74:1.26	45144	Casein kinase II subunit alpha OS=Homo sapiens OX=9606 GN=CSNK2A1 PE=1 SV=1
730	TRUE	O14966|RAB7L_HUMAN	6.98	22.17	5	4		4948.82	5082.27	2973.83	3058.86	4891.12	6478.76	4387.16	4445.77	1.09:1.12:0.66:0.67:1.08:1.43:0.97:0.98	4533.66	5274.18	0.92:1.08	23155	Ras-related protein Rab-7L1 OS=Homo sapiens OX=9606 GN=RAB29 PE=1 SV=1
573	TRUE	Q9Y5K6|CD2AP_HUMAN	1.81	11.74	6	6		1871.69	2048.5	382.695	284.068	1523.25	871.088	929.716	910.772	1.70:1.86:0.35:0.26:1.38:0.79:0.84:0.83	1195.64	1058.71	1.06:0.94	71451	CD2-associated protein OS=Homo sapiens OX=9606 GN=CD2AP PE=1 SV=1
448	TRUE	Q9NZ08|ERAP1_HUMAN	10.1	6.91	5	5	Oxidation (M)	1023.34	952.88	397.951	320.382	1560.68	770.43	1113.36	1254.03	1.11:1.03:0.43:0.35:1.69:0.83:1.20:1.36	824.503	1174.62	0.82:1.18	107235	Endoplasmic reticulum aminopeptidase 1 OS=Homo sapiens OX=9606 GN=ERAP1 PE=1 SV=3
308	TRUE	O60603|TLR2_HUMAN	18.44	18.62	12	12	Oxidation (M)	9758.65	9844.78	2082.69	2677.37	1485.84	808.007	821.851	1298.8	2.71:2.74:0.58:0.74:0.41:0.22:0.23:0.36	6090.87	1103.62	1.69:0.31	89838	Toll-like receptor 2 OS=Homo sapiens OX=9606 GN=TLR2 PE=1 SV=1
541	TRUE	O96019|ACL6A_HUMAN	7.2	28.9	8	8	Oxidation (M)	5163.05	6291.5	1160.55	624.241	5718.05	3395.05	5417.44	7112.18	1.18:1.44:0.27:0.14:1.31:0.78:1.24:1.63	3447.71	5410.68	0.78:1.22	47461	Actin-like protein 6A OS=Homo sapiens OX=9606 GN=ACTL6A PE=1 SV=1
1205	TRUE	Q15043|S39AE_HUMAN	2.38	5.08	2	2		5905.36	6149.33	451.621	688.692	1699.96	558.37	1586.74	1316.58	2.57:2.68:0.20:0.30:0.74:0.24:0.69:0.57	3298.75	1332.77	1.42:0.58	54212	Metal cation symporter ZIP14 OS=Homo sapiens OX=9606 GN=SLC39A14 PE=1 SV=3
269	TRUE	Q16643|DREB_HUMAN	3.43	25.89	14	14	Carbamidomethylation; Oxidation (M)	57196.5	57089.8	5209.95	4553.42	15506.4	7166.65	7882.58	8471.73	2.81:2.80:0.26:0.22:0.76:0.35:0.39:0.42	31265.6	9827.88	1.52:0.48	71429	Drebrin OS=Homo sapiens OX=9606 GN=DBN1 PE=1 SV=4
867	TRUE	Q8NG11|TSN14_HUMAN	37.53	17.78	4	4	Carbamidomethylation	1540.09	1293.35	1083.15	1082.31	5242.83	3895.09	7538.57	8217.71	0.41:0.35:0.29:0.29:1.40:1.04:2.02:2.20	1249.72	6223.55	0.33:1.67	30691	Tetraspanin-14 OS=Homo sapiens OX=9606 GN=TSPAN14 PE=1 SV=1
340	TRUE	Q9P0L0|VAPA_HUMAN	3.65	27.71	7	6	Carbamidomethylation; Oxidation (M)	34358.8	33728.6	7276.64	7246.49	25564.3	11442.9	31112	38749.6	1.45:1.42:0.31:0.31:1.08:0.48:1.31:1.64	20652.6	26717.2	0.87:1.13	27893	Vesicle-associated membrane protein-associated protein A OS=Homo sapiens OX=9606 GN=VAPA PE=1 SV=3
476	TRUE	Q12797|ASPH_HUMAN	0.1	18.07	7	7	Oxidation (M)	3892.79	4260.07	2507.83	2517.28	2424.73	1811.72	4021.24	6142.71	1.13:1.24:0.73:0.73:0.70:0.53:1.17:1.78	3294.49	3600.1	0.96:1.04	85863	Aspartyl/asparaginyl beta-hydroxylase OS=Homo sapiens OX=9606 GN=ASPH PE=1 SV=3
986	TRUE	P63165|SUMO1_HUMAN	1.11	27.72	2	2	Acetylation (N-term)	8715.08	8204.9	997.133	872.206	3445.74	1526.02	4574.01	6014.48	2.03:1.91:0.23:0.20:0.80:0.36:1.07:1.40	4764.86	3964.87	1.09:0.91	11557	Small ubiquitin-related modifier 1 OS=Homo sapiens OX=9606 GN=SUMO1 PE=1 SV=1
16	TRUE	Q5T4S7|UBR4_HUMAN	5.08	21.84	83	83	Carbamidomethylation; Oxidation (M)	20033.3	20080.8	3498.26	3770.9	18356.2	10653.9	14277.9	18163.7	1.47:1.48:0.26:0.28:1.35:0.78:1.05:1.34	11845.8	15362.9	0.87:1.13	573841	E3 ubiquitin-protein ligase UBR4 OS=Homo sapiens OX=9606 GN=UBR4 PE=1 SV=1
723	TRUE	Q08357|S20A2_HUMAN	1.96	11.66	5	5		20589.4	20433.5	7425.73	7934.03	16474.7	8720.19	16377.8	20703.6	1.39:1.38:0.50:0.53:1.11:0.59:1.10:1.40	14244.7	15569.1	0.96:1.04	70392	Sodium-dependent phosphate transporter 2 OS=Homo sapiens OX=9606 GN=SLC20A2 PE=1 SV=1
734	TRUE	Q92485|ASM3B_HUMAN	24.71	9.01	3	3		884.672	974.84	380.62	987.434	7539.61	5892.78	4489.11	1906.72	0.31:0.34:0.13:0.34:2.62:2.04:1.56:0.66	1215.33	5185.12	0.38:1.62	50814	Acid sphingomyelinase-like phosphodiesterase 3b OS=Homo sapiens OX=9606 GN=SMPDL3B PE=1 SV=2
120	TRUE	P06702|S10A9_HUMAN	9.94	37.72	3	3	Oxidation (M)	160.388	307.289	418.381	306.747	1652.65	156.43	1623.69	2662.05	0.18:0.34:0.46:0.34:1.81:0.17:1.78:2.92	343.13	1742.26	0.33:1.67	13242	Protein S100-A9 OS=Homo sapiens OX=9606 GN=S100A9 PE=1 SV=1
169	TRUE	Q08431|MFGM_HUMAN	31.14	24.03	8	8		1607.96	1323.7	1204.91	728.257	4216.58	3106.89	5360.94	5219.3	0.56:0.47:0.42:0.26:1.48:1.09:1.88:1.83	1336.57	4475.93	0.46:1.54	43105	Lactadherin OS=Homo sapiens OX=9606 GN=MFGE8 PE=1 SV=3
396	TRUE	P08865|RSSA_HUMAN	14.18	52.2	10	10	Acetylation (N-term); Carbamidomethylation; Oxidation (M)	7402.58	4962.84	3860.93	4216.34	6459.49	7986.72	8935.57	7097.24	1.16:0.78:0.61:0.66:1.01:1.25:1.40:1.12	5110.67	7619.76	0.80:1.20	32854	40S ribosomal protein SA OS=Homo sapiens OX=9606 GN=RPSA PE=1 SV=4
720	TRUE	P35611|ADDA_HUMAN	0.2	6.38	4	4		2983.05	1797.8	630.686	672.82	1174.09	1442.81	780.441	1559.18	2.16:1.30:0.46:0.49:0.85:1.05:0.57:1.13	1521.09	1381.21	1.05:0.95	80955	Alpha-adducin OS=Homo sapiens OX=9606 GN=ADD1 PE=1 SV=2
334	TRUE	Q8N1W1|ARG28_HUMAN	0.67	9.68	11	11	Oxidation (M)	2552.16	3747	457.648	760.867	1407.34	630.393	1746.31	1426.5	1.60:2.36:0.29:0.48:0.88:0.40:1.10:0.90	2326.85	1302.64	1.28:0.72	191891	Rho guanine nucleotide exchange factor 28 OS=Homo sapiens OX=9606 GN=ARHGEF28 PE=1 SV=3
759	TRUE	Q9NUP9|LIN7C_HUMAN	9.91	29.95	5	5	Acetylation (N-term); Carbamidomethylation; Oxidation (M)	1446.27	2466.09	765.467	1076.09	2052.47	1371.44	4490.64	5778.69	0.59:1.01:0.31:0.44:0.84:0.56:1.85:2.38	1549.06	3605.8	0.60:1.40	21834	Protein lin-7 homolog C OS=Homo sapiens OX=9606 GN=LIN7C PE=1 SV=1
656	TRUE	Q9Y6K5|OAS3_HUMAN	6.98	5.06	5	5	Oxidation (M)	1647.81	1987.4	342.076	627.195	1973.63	1125.03	2195.36	1806.18	1.13:1.36:0.23:0.43:1.35:0.77:1.50:1.23	1151.12	1775.05	0.79:1.21	121170	2'-5'-oligoadenylate synthase 3 OS=Homo sapiens OX=9606 GN=OAS3 PE=1 SV=3
452	TRUE	P57729|RAB38_HUMAN	3.5	41.23	8	7	Oxidation (M)	5989.7	4399.37	1989.85	8494.22	9334.92	3195.37	6975.83	7591	1.00:0.73:0.33:1.42:1.56:0.53:1.16:1.27	5218.28	6774.28	0.87:1.13	23712	Ras-related protein Rab-38 OS=Homo sapiens OX=9606 GN=RAB38 PE=1 SV=1
721	TRUE	Q70E73|RAPH1_HUMAN	0.19	2.48	3	3		1228.36	857.643	430.192	565.213	1656.98	284.966	888.439	671.824	1.49:1.04:0.52:0.69:2.01:0.35:1.08:0.82	770.352	875.553	0.94:1.06	135256	Ras-associated and pleckstrin homology domains-containing protein 1 OS=Homo sapiens OX=9606 GN=RAPH1 PE=1 SV=3
602	TRUE	O15118|NPC1_HUMAN	2.57	6.26	5	5	Oxidation (M)	2791.75	3035.23	796.84	887.677	1316.67	673.839	1396.77	1718.64	1.77:1.92:0.51:0.56:0.83:0.43:0.89:1.09	2135.82	1276.48	1.25:0.75	142167	NPC intracellular cholesterol transporter 1 OS=Homo sapiens OX=9606 GN=NPC1 PE=1 SV=2
915	TRUE	O15258|RER1_HUMAN	3.21	24.49	4	4	Acetylation (N-term); Oxidation (M)	8649.78	8740.23	1421.19	1889.64	6546.48	4252.24	5671.28	5733.59	1.61:1.63:0.26:0.35:1.22:0.79:1.06:1.07	5175.21	5550.9	0.96:1.04	22958	Protein RER1 OS=Homo sapiens OX=9606 GN=RER1 PE=1 SV=1
904	TRUE	Q7RTP6|MICA3_HUMAN	1.87	2.05	3	3		4601.66	4521.63	211.848	222.743	909.749	197.956	783.054	1107	2.93:2.88:0.13:0.14:0.58:0.13:0.50:0.71	2468.87	749.44	1.53:0.47	224295	[F-actin]-monooxygenase MICAL3 OS=Homo sapiens OX=9606 GN=MICAL3 PE=1 SV=2
647	TRUE	Q9ULL4|PLXB3_HUMAN	18.29	2.1	4	3		158.337	178.648	68.4922	0	620.433	245.376	553.512	693.345	0.50:0.57:0.22:0.00:1.97:0.78:1.76:2.20	158.651	566.914	0.44:1.56	206847	Plexin-B3 OS=Homo sapiens OX=9606 GN=PLXNB3 PE=1 SV=2
798	TRUE	P35354|PGH2_HUMAN	4.47	14.4	5	5	Oxidation (M)	4833.83	4420.72	1499.76	781.321	732.803	3187.04	429.149	1985.48	2.16:1.98:0.67:0.35:0.33:1.43:0.19:0.89	2993.55	1583.62	1.31:0.69	68996	Prostaglandin G/H synthase 2 OS=Homo sapiens OX=9606 GN=PTGS2 PE=1 SV=2
733	TRUE	Q9Y4H2|IRS2_HUMAN	0.74	5.75	5	5		2854.04	2607.95	276.264	242.366	882.6	664.106	1141.25	1321.77	2.29:2.09:0.22:0.19:0.71:0.53:0.91:1.06	1578.39	1090.42	1.18:0.82	137334	Insulin receptor substrate 2 OS=Homo sapiens OX=9606 GN=IRS2 PE=1 SV=2
703	TRUE	P05362|ICAM1_HUMAN	16.18	13.53	5	5		8908.4	9052.4	7029.47	6839.86	6801.16	5475.69	3583.1	3810.24	1.38:1.41:1.09:1.06:1.06:0.85:0.56:0.59	7957.53	4917.55	1.24:0.76	57825	Intercellular adhesion molecule 1 OS=Homo sapiens OX=9606 GN=ICAM1 PE=1 SV=2
509	TRUE	Q7Z4S6|KI21A_HUMAN	14.79	4.6	6	6	Oxidation (M)	1018.09	1110.73	443.978	495.163	1632.46	967.513	1986.44	2630.34	0.79:0.86:0.35:0.39:1.27:0.75:1.55:2.05	856.03	1804.19	0.64:1.36	187179	Kinesin-like protein KIF21A OS=Homo sapiens OX=9606 GN=KIF21A PE=1 SV=2
184	TRUE	Q07954|LRP1_HUMAN	10.94	4.95	17	17	Oxidation (M)	2552.29	2718.05	1309.79	1115.52	2962.85	1973.85	5183.65	5475.86	0.88:0.93:0.45:0.38:1.02:0.68:1.78:1.88	1923.91	3899.05	0.66:1.34	504606	Prolow-density lipoprotein receptor-related protein 1 OS=Homo sapiens OX=9606 GN=LRP1 PE=1 SV=2
434	TRUE	O75038|PLCH2_HUMAN	0.65	10.03	10	10	Oxidation (M)	5717.09	5857.01	1411.66	1150.3	2733.31	1898.53	3393.01	4360.57	1.72:1.77:0.43:0.35:0.82:0.57:1.02:1.32	3534.02	3096.36	1.07:0.93	154668	1-phosphatidylinositol 4,5-bisphosphate phosphodiesterase eta-2 OS=Homo sapiens OX=9606 GN=PLCH2 PE=1 SV=3
951	TRUE	Q9NR22|ANM8_HUMAN	0.13	7.61	2	2	Oxidation (M)	5747.4	7307.9	932.764	877.751	1280.13	1890.69	4520.97	2853.86	1.81:2.30:0.29:0.28:0.40:0.60:1.42:0.90	3716.45	2636.41	1.17:0.83	45291	Protein arginine N-methyltransferase 8 OS=Homo sapiens OX=9606 GN=PRMT8 PE=1 SV=2
458	TRUE	Q8NFF5|FAD1_HUMAN	0.55	17.38	7	7	Oxidation (M)	4363.73	4448.62	384.856	379.998	1100.39	661.191	2057.66	1190.99	2.39:2.44:0.21:0.21:0.60:0.36:1.13:0.65	2394.3	1252.56	1.31:0.69	65266	FAD synthase OS=Homo sapiens OX=9606 GN=FLAD1 PE=1 SV=1
286	TRUE	P60903|S10AA_HUMAN	2.55	37.11	3	3	Oxidation (M)	17031	17049.2	3816.78	3357.05	4060.87	9444.69	2493.16	9614.56	2.04:2.04:0.46:0.40:0.49:1.13:0.30:1.15	10313.5	6403.32	1.23:0.77	11203	Protein S100-A10 OS=Homo sapiens OX=9606 GN=S100A10 PE=1 SV=2
841	TRUE	O00592|PODXL_HUMAN	6.87	8.06	3	3		20125.2	20320.9	2232.02	1826.23	3782.01	2561.85	1128.98	2641.99	2.95:2.98:0.33:0.27:0.55:0.38:0.17:0.39	11126.1	2528.71	1.63:0.37	58635	Podocalyxin OS=Homo sapiens OX=9606 GN=PODXL PE=1 SV=2
736	TRUE	Q99808|S29A1_HUMAN	7.81	8.99	3	3		6618.66	4850.2	2013.47	2286.93	2519.07	695.324	1810.87	2990.2	2.23:1.63:0.68:0.77:0.85:0.23:0.61:1.01	3942.31	2003.87	1.33:0.67	50219	Equilibrative nucleoside transporter 1 OS=Homo sapiens OX=9606 GN=SLC29A1 PE=1 SV=3
490	TRUE	Q8TEU7|RPGF6_HUMAN	4.83	6.5	7	7	Oxidation (M)	4963.09	2320.03	1121.02	1190.71	1830.41	1164.82	745.98	1726.25	2.64:1.23:0.60:0.63:0.97:0.62:0.40:0.92	2398.71	1366.86	1.27:0.73	179423	Rap guanine nucleotide exchange factor 6 OS=Homo sapiens OX=9606 GN=RAPGEF6 PE=1 SV=2
814	TRUE	P58335|ANTR2_HUMAN	8.16	7.16	5	4		3653.01	3990.46	360.527	413.666	406.594	457.361	328.986	452.587	2.90:3.17:0.29:0.33:0.32:0.36:0.26:0.36	2691.42	516.353	1.68:0.32	53666	Anthrax toxin receptor 2 OS=Homo sapiens OX=9606 GN=ANTXR2 PE=1 SV=5
679	TRUE	Q13444|ADA15_HUMAN	1.42	8.57	5	5		7255.55	7205.27	2877.01	3379.05	6910.13	4799.24	4361.32	5223.93	1.38:1.37:0.55:0.64:1.32:0.91:0.83:0.99	5270.68	5696.04	0.96:1.04	92959	Disintegrin and metalloproteinase domain-containing protein 15 OS=Homo sapiens OX=9606 GN=ADAM15 PE=1 SV=4
852	TRUE	Q9UL26|RB22A_HUMAN	2.39	29.9	5	4	Oxidation (M)	981.92	1355.16	439.294	342.545	780.247	332.545	1586.23	1555.72	1.07:1.47:0.48:0.37:0.85:0.36:1.72:1.69	830.365	1063.69	0.88:1.12	21855	Ras-related protein Rab-22A OS=Homo sapiens OX=9606 GN=RAB22A PE=1 SV=2
492	TRUE	Q12933|TRAF2_HUMAN	6.41	20.36	8	8	Carbamidomethylation; Oxidation (M)	5798.5	6029.2	1223.52	897.467	8221.35	3902.72	3686.33	5782.59	1.31:1.36:0.28:0.20:1.85:0.88:0.83:1.30	3487.17	5398.25	0.78:1.22	55859	TNF receptor-associated factor 2 OS=Homo sapiens OX=9606 GN=TRAF2 PE=1 SV=2
974	TRUE	Q99985|SEM3C_HUMAN	4.57	5.46	3	3	Oxidation (M)	872.48	864.074	3901.38	533.408	873.037	339.189	688.529	1025.41	0.77:0.76:3.43:0.47:0.77:0.30:0.61:0.90	1669.56	765.898	1.37:0.63	85207	Semaphorin-3C OS=Homo sapiens OX=9606 GN=SEMA3C PE=2 SV=2
859	TRUE	O95429|BAG4_HUMAN	13.87	12.04	4	4	Oxidation (M)	3308.39	3475.31	1644.63	1607.79	982.576	736.401	1445.05	1614.97	1.79:1.88:0.89:0.87:0.53:0.40:0.78:0.87	2723.24	1275.22	1.36:0.64	49594	BAG family molecular chaperone regulator 4 OS=Homo sapiens OX=9606 GN=BAG4 PE=1 SV=1
981	TRUE	P13473|LAMP2_HUMAN	0.26	7.07	3	3		4873.15	4349.53	905.561	1124.4	2302.35	1738.13	2144.47	2200.99	1.99:1.77:0.37:0.46:0.94:0.71:0.87:0.90	2813.16	2096.49	1.15:0.85	44961	Lysosome-associated membrane glycoprotein 2 OS=Homo sapiens OX=9606 GN=LAMP2 PE=1 SV=2
539	TRUE	P20073|ANXA7_HUMAN	24.18	19.67	9	9	Carbamidomethylation; Oxidation (M)	6347.44	7048.39	4328.14	4660.5	14698.7	9553.56	22382	23521.8	0.55:0.61:0.37:0.40:1.27:0.83:1.93:2.03	5596.12	17539	0.48:1.52	52739	Annexin A7 OS=Homo sapiens OX=9606 GN=ANXA7 PE=1 SV=3
909	TRUE	Q6IAA8|LTOR1_HUMAN	3.62	32.92	4	4		756.995	1233.7	6499.86	7668.99	587.61	7148.66	817.628	878.93	0.24:0.39:2.03:2.40:0.18:2.23:0.26:0.27	4039.89	2358.21	1.26:0.74	17745	Ragulator complex protein LAMTOR1 OS=Homo sapiens OX=9606 GN=LAMTOR1 PE=1 SV=2
543	TRUE	P04049|RAF1_HUMAN	1.14	14.2	7	7	Oxidation (M)	6785.89	6286.79	2040.79	1705.06	3941.64	2223.03	2717.85	3861.7	1.84:1.70:0.55:0.46:1.07:0.60:0.74:1.05	4204.63	3186.05	1.14:0.86	73052	RAF proto-oncogene serine/threonine-protein kinase OS=Homo sapiens OX=9606 GN=RAF1 PE=1 SV=1
921	TRUE	P60510|PP4C_HUMAN	15.66	14.01	4	3	Oxidation (M)	992.136	1615.91	1167.88	607.902	2529.59	1800.72	1863.01	1748.79	0.64:1.05:0.76:0.39:1.64:1.17:1.21:1.14	1095.96	1985.53	0.71:1.29	35080	Serine/threonine-protein phosphatase 4 catalytic subunit OS=Homo sapiens OX=9606 GN=PPP4C PE=1 SV=1
557	TRUE	Q13557|KCC2D_HUMAN	33.1	18.24	7	7	Oxidation (M)	6486.88	5885.97	4031.23	4025.2	19742.2	12626	23071.5	25884.5	0.51:0.46:0.32:0.32:1.55:0.99:1.81:2.04	5107.32	20331.1	0.40:1.60	56369	Calcium/calmodulin-dependent protein kinase type II subunit delta OS=Homo sapiens OX=9606 GN=CAMK2D PE=1 SV=3
358	TRUE	Q8WWI5|CTL1_HUMAN	5.7	19.33	11	11	Carbamidomethylation; Oxidation (M)	13116.5	13534.9	5033.48	4977.93	15579.8	9001.41	11002.9	12774.2	1.23:1.27:0.47:0.47:1.47:0.85:1.04:1.20	9165.69	12089.6	0.86:1.14	73302	Choline transporter-like protein 1 OS=Homo sapiens OX=9606 GN=SLC44A1 PE=1 SV=1
1198	TRUE	Q9NZ09|UBAP1_HUMAN	15.95	7.17	2	2		3112.17	2891.97	1692.2	1409.12	690.402	832.487	561.768	1698.45	1.93:1.80:1.05:0.87:0.43:0.52:0.35:1.05	2276.36	945.776	1.41:0.59	55084	Ubiquitin-associated protein 1 OS=Homo sapiens OX=9606 GN=UBAP1 PE=1 SV=1
665	TRUE	Q8IYI6|EXOC8_HUMAN	13.69	12	7	7		2835.28	2592.5	5033.55	3256.82	2426.13	1001.69	1679.02	2279.23	1.07:0.98:1.91:1.23:0.92:0.38:0.64:0.86	3429.54	1846.52	1.30:0.70	81799	Exocyst complex component 8 OS=Homo sapiens OX=9606 GN=EXOC8 PE=1 SV=2
777	TRUE	P25445|TNR6_HUMAN	13.2	7.76	2	2		835.728	919.189	0	0	328.364	0	105.925	256.352	2.73:3.01:0.00:0.00:1.07:0.00:0.35:0.84	877.458	269.172	1.53:0.47	37732	Tumor necrosis factor receptor superfamily member 6 OS=Homo sapiens OX=9606 GN=FAS PE=1 SV=1
696	TRUE	O15379|HDAC3_HUMAN	0.93	14.95	4	4	Oxidation (M)	1748.72	3101.09	620.544	1766.88	744.602	3742.12	1582.38	2189.91	0.90:1.60:0.32:0.91:0.38:1.93:0.82:1.13	1904.42	2064.75	0.96:1.04	48848	Histone deacetylase 3 OS=Homo sapiens OX=9606 GN=HDAC3 PE=1 SV=2
78	TRUE	P02786|TFR1_HUMAN	14.48	43.95	33	33	Oxidation (M)	67337.7	57255.6	49629.8	59667.1	72441.2	63058.1	90014.9	94126.3	0.97:0.83:0.72:0.86:1.05:0.91:1.30:1.36	58472.5	79910.2	0.85:1.15	84871	Transferrin receptor protein 1 OS=Homo sapiens OX=9606 GN=TFRC PE=1 SV=2
283	TRUE	Q12955|ANK3_HUMAN	4.27	2.76	9	9		1467.75	2809.11	360.18	509.24	1748.69	1041.01	1772.77	1535.08	1.04:2.00:0.26:0.36:1.24:0.74:1.26:1.09	1559.59	1524.39	1.01:0.99	480410	Ankyrin-3 OS=Homo sapiens OX=9606 GN=ANK3 PE=1 SV=3
390	TRUE	Q14344|GNA13_HUMAN	6.04	23.34	8	7		5642.22	5325.23	1009.29	1071.26	5297.43	2956.07	4669.57	5800.46	1.42:1.34:0.25:0.27:1.33:0.74:1.18:1.46	3262	4680.88	0.82:1.18	44050	Guanine nucleotide-binding protein subunit alpha-13 OS=Homo sapiens OX=9606 GN=GNA13 PE=1 SV=2
453	TRUE	P13726|TF_HUMAN	0.68	29.49	9	9	Carbamidomethylation; Oxidation (M)	329153	327610	70919.6	71918.2	273472	182187	122027	130276	1.75:1.74:0.38:0.38:1.45:0.97:0.65:0.69	199900	176990	1.06:0.94	33068	Tissue factor OS=Homo sapiens OX=9606 GN=F3 PE=1 SV=1
31	TRUE	P13639|EF2_HUMAN	0.23	49.18	47	47	Carbamidomethylation; Oxidation (M)	78958.6	83737.3	33052.2	32695.5	51034.7	42253.3	58138	61306.8	1.43:1.52:0.60:0.59:0.93:0.77:1.05:1.11	57110.9	53183.2	1.04:0.96	95338	Elongation factor 2 OS=Homo sapiens OX=9606 GN=EEF2 PE=1 SV=4
1	TRUE	Q15149|PLEC_HUMAN	0.24	51.07	256	232	Acetylation (N-term); Carbamidomethylation; Oxidation (M)	126963	135614	24711.2	24131.5	53028.2	60320	57937.1	63380	1.86:1.99:0.36:0.35:0.78:0.88:0.85:0.93	77992.8	58744	1.14:0.86	531791	Plectin OS=Homo sapiens OX=9606 GN=PLEC PE=1 SV=3
646	TRUE	Q9H4A4|AMPB_HUMAN	0.01	11.85	5	5	Carbamidomethylation	991.646	882.226	2842.57	2586.01	1772.26	2230.2	2556.47	634.724	0.55:0.49:1.57:1.43:0.98:1.23:1.41:0.35	1825.61	1798.41	1.01:0.99	72596	Aminopeptidase B OS=Homo sapiens OX=9606 GN=RNPEP PE=1 SV=2
1002	TRUE	Q9BQE4|SELS_HUMAN	6.39	21.16	3	3	Oxidation (M)	887.564	945.932	110.687	201.342	897.245	715.361	963.901	575.61	1.34:1.43:0.17:0.30:1.35:1.08:1.46:0.87	646.95	788.029	0.90:1.10	21132	Selenoprotein S OS=Homo sapiens OX=9606 GN=SELENOS PE=1 SV=3
520	TRUE	Q13586|STIM1_HUMAN	16.61	13.72	7	7		2293.5	2045.29	627.414	1040.39	3576.02	2487.74	4556.91	5554.65	0.83:0.74:0.23:0.38:1.29:0.90:1.64:2.00	1501.65	4043.83	0.54:1.46	77423	Stromal interaction molecule 1 OS=Homo sapiens OX=9606 GN=STIM1 PE=1 SV=3
1169	TRUE	Q8IYB5|SMAP1_HUMAN	1.9	4.93	2	2		838.266	1159.1	183.102	269.126	1050.89	349.564	649.114	525.653	1.33:1.85:0.29:0.43:1.67:0.56:1.03:0.84	684.68	711.904	0.98:1.02	50386	Stromal membrane-associated protein 1 OS=Homo sapiens OX=9606 GN=SMAP1 PE=1 SV=2
394	TRUE	O75044|SRGP2_HUMAN	7.25	8.12	8	8	Oxidation (M)	2205.37	2329.64	785.024	803.146	3918.7	1283.04	2198.7	2868.55	1.08:1.14:0.38:0.39:1.91:0.63:1.07:1.40	1530.8	2567.25	0.75:1.25	120871	SLIT-ROBO Rho GTPase-activating protein 2 OS=Homo sapiens OX=9606 GN=SRGAP2 PE=1 SV=3
429	TRUE	Q14677|EPN4_HUMAN	6.91	19.04	10	10	Oxidation (M)	5334.33	5304.58	1058.15	1382.7	5656.41	2775.91	5682.96	7029.45	1.25:1.24:0.25:0.32:1.32:0.65:1.33:1.64	3269.94	5286.18	0.76:1.24	68259	Clathrin interactor 1 OS=Homo sapiens OX=9606 GN=CLINT1 PE=1 SV=1
349	TRUE	Q5H9R7|PP6R3_HUMAN	2.01	15.23	11	11	Carbamidomethylation; Oxidation (M)	7458.96	6080.93	1331.74	1384.99	6263.88	3176.45	3406.22	3344.7	1.84:1.50:0.33:0.34:1.54:0.78:0.84:0.82	4064.15	4047.81	1.00:1.00	97669	Serine/threonine-protein phosphatase 6 regulatory subunit 3 OS=Homo sapiens OX=9606 GN=PPP6R3 PE=1 SV=2
146	TRUE	Q96RT1|ERBIN_HUMAN	4.62	18.7	20	20	Oxidation (M)	6326.8	7531.79	1889.28	1870.41	7048.62	2662.06	6667.61	8900.71	1.18:1.40:0.35:0.35:1.31:0.50:1.24:1.66	4404.57	6319.75	0.82:1.18	158298	Erbin OS=Homo sapiens OX=9606 GN=ERBIN PE=1 SV=2

## Sheet: Total Area Normalization
Protein Group	Top	Accession	Significance	Coverage (%)	#Peptides	#Unique	PTM	Description	Myc_Cells_2-2 Area	Myc_Cells_2-1 Area	Myc_Cells_1-2 Area	Myc_Cells_1-1 Area	EV_Cells_2-2 Area	EV_Cells_2-1 Area	EV_Cells_1-2 Area	EV_Cells_1-1 Area
197	TRUE	P46531|NOTC1_HUMAN	0.96	5.21	13	11	Oxidation (M)	Neurogenic locus notch homolog protein 1 OS=Homo sapiens OX=9606 GN=NOTCH1 PE=1 SV=4	6101.2	5986.42	3419.19	2938.9	4218.21	3150.43	4059.13	4174.15
410	TRUE	P01889|HLAB_HUMAN	33.73	10.5	9	3		HLA class I histocompatibility antigen, B alpha chain OS=Homo sapiens OX=9606 GN=HLA-B PE=1 SV=3	1133.57	1153.57	612.155	759.564	15340.2	12556.9	9070.66	11755.4
384	TRUE	P11166|GTR1_HUMAN	2.65	12.8	8	8	Oxidation (M)	Solute carrier family 2, facilitated glucose transporter member 1 OS=Homo sapiens OX=9606 GN=SLC2A1 PE=1 SV=2	13262.3	12878.4	14284.8	14446.6	10801.4	9906.2	8248.36	8668.73
811	TRUE	O14735|CDIPT_HUMAN	8.38	15.96	3	3	Oxidation (M)	CDP-diacylglycerol--inositol 3-phosphatidyltransferase OS=Homo sapiens OX=9606 GN=CDIPT PE=1 SV=1	404.114	427.317	1430.62	838.865	799.355	1644.78	1278.52	362.312
650	TRUE	P38398|BRCA1_HUMAN	0.48	4.72	5	5	Oxidation (M)	Breast cancer type 1 susceptibility protein OS=Homo sapiens OX=9606 GN=BRCA1 PE=1 SV=2	970.854	1018.5	511.743	454.946	725.405	283.726	626.13	518.818
931	TRUE	Q8NFH5|NUP35_HUMAN	2.25	19.02	4	4	Oxidation (M)	Nucleoporin NUP35 OS=Homo sapiens OX=9606 GN=NUP35 PE=1 SV=1	933.204	1184.13	246.493	50.9489	341.64	1056.49	472.231	271.223
642	TRUE	P62330|ARF6_HUMAN	2.43	38.86	5	5	Oxidation (M)	ADP-ribosylation factor 6 OS=Homo sapiens OX=9606 GN=ARF6 PE=1 SV=2	5528.41	5665.74	5265.86	4271.67	4871.59	4845.53	4957.81	4669.6
304	TRUE	Q8WTV0|SCRB1_HUMAN	22.74	13.22	8	8	Oxidation (M)	Scavenger receptor class B member 1 OS=Homo sapiens OX=9606 GN=SCARB1 PE=1 SV=1	17806.9	17543.7	32141.7	32788.2	8839.19	8075.69	12168.7	10165.1
851	TRUE	Q8NF37|PCAT1_HUMAN	21.37	9.55	5	5		Lysophosphatidylcholine acyltransferase 1 OS=Homo sapiens OX=9606 GN=LPCAT1 PE=1 SV=2	1752.35	1246.5	2746.7	3336.17	3105.43	4386.57	2188.32	2318.87
799	TRUE	P28482|MK01_HUMAN	0.67	11.67	3	3	Acetylation (N-term); Oxidation (M)	Mitogen-activated protein kinase 1 OS=Homo sapiens OX=9606 GN=MAPK1 PE=1 SV=3	2074.56	1978.74	709.027	630.473	768.538	597.994	1037.51	957.75
612	TRUE	P30419|NMT1_HUMAN	3.41	13.71	4	4	Oxidation (M)	Glycylpeptide N-tetradecanoyltransferase 1 OS=Homo sapiens OX=9606 GN=NMT1 PE=1 SV=2	1073.15	1115.7	879.394	774.697	1013.67	762.33	922.006	1446.55
274	TRUE	O43815|STRN_HUMAN	1.64	27.44	13	13	Acetylation (N-term); Carbamidomethylation; Oxidation (M)	Striatin OS=Homo sapiens OX=9606 GN=STRN PE=1 SV=4	3047.05	3525.37	1135.42	1184.85	2237.64	1149.74	2842.3	2082.67
601	TRUE	P33121|ACSL1_HUMAN	1.81	11.03	7	7	Acetylation (N-term); Oxidation (M)	Long-chain-fatty-acid--CoA ligase 1 OS=Homo sapiens OX=9606 GN=ACSL1 PE=1 SV=1	1092.7	1083.61	807.972	847.979	966.073	1022.58	725.416	789.005
149	TRUE	Q08554|DSC1_HUMAN	0.33	4.81	4	4		Desmocollin-1 OS=Homo sapiens OX=9606 GN=DSC1 PE=1 SV=2	1231.88	1168.07	1082.29	1184.88	660.451	731.761	1240.05	1351.42
560	TRUE	Q92692|NECT2_HUMAN	0.4	18.03	6	6	Carbamidomethylation; Oxidation (M)	Nectin-2 OS=Homo sapiens OX=9606 GN=NECTIN2 PE=1 SV=1	7427.89	6672.86	4775.65	4557.47	5427.4	2784.95	5998.08	5590.03
118	TRUE	P54652|HSP72_HUMAN	30.15	13.77	23	7	Oxidation (M)	Heat shock-related 70 kDa protein 2 OS=Homo sapiens OX=9606 GN=HSPA2 PE=1 SV=1	450.093	542.304	891.311	826.81	1732.75	1914.38	1796.28	859.596
739	TRUE	Q16513|PKN2_HUMAN	4.9	6.2	6	5	Oxidation (M)	Serine/threonine-protein kinase N2 OS=Homo sapiens OX=9606 GN=PKN2 PE=1 SV=1	269.843	654.914	379.173	350.1	601.5	299.498	504.031	563.228
673	TRUE	Q8WXX5|DNJC9_HUMAN	25.63	34.62	6	6	Oxidation (M)	DnaJ homolog subfamily C member 9 OS=Homo sapiens OX=9606 GN=DNAJC9 PE=1 SV=1	705.777	550.252	672.685	1013.65	10132.9	2103.62	5296.51	4035.17
1135	TRUE	Q0VDF9|HSP7E_HUMAN	5.03	4.52	2	2		Heat shock 70 kDa protein 14 OS=Homo sapiens OX=9606 GN=HSPA14 PE=1 SV=1	287.283	341.991	198.45	224.298	241.4	283.601	304.8	440.854
232	TRUE	P01130|LDLR_HUMAN	4.58	16.51	12	12	Carbamidomethylation; Oxidation (M)	Low-density lipoprotein receptor OS=Homo sapiens OX=9606 GN=LDLR PE=1 SV=1	20233.5	18435	8312.34	9672.59	16312.3	11751.2	21097.2	22143
372	TRUE	P04626|ERBB2_HUMAN	4.84	8.45	11	9	Oxidation (M)	Receptor tyrosine-protein kinase erbB-2 OS=Homo sapiens OX=9606 GN=ERBB2 PE=1 SV=1	1027.22	654.091	882.276	1154.78	834.844	525.001	1772.92	2292.19
527	TRUE	Q02487|DSC2_HUMAN	14.36	9.43	7	6	Oxidation (M)	Desmocollin-2 OS=Homo sapiens OX=9606 GN=DSC2 PE=1 SV=1	436.039	465.6	273.034	336.863	660.334	649.773	1727.75	2248.96
770	TRUE	P05121|PAI1_HUMAN	0.5	7.21	2	2		Plasminogen activator inhibitor 1 OS=Homo sapiens OX=9606 GN=SERPINE1 PE=1 SV=1	381.783	515.848	230.904	88.258	217.234	208.341	216.563	223.289
636	TRUE	O15144|ARPC2_HUMAN	3.91	15.67	4	4	Oxidation (M)	Actin-related protein 2/3 complex subunit 2 OS=Homo sapiens OX=9606 GN=ARPC2 PE=1 SV=1	734.52	1211.27	898.235	412.944	570.837	1217.5	458.152	3866.04
717	TRUE	Q96S59|RANB9_HUMAN	5.46	9.47	5	5	Oxidation (M)	Ran-binding protein 9 OS=Homo sapiens OX=9606 GN=RANBP9 PE=1 SV=1	5983.01	916.759	498.766	505.62	10921.9	1611.47	539.835	9589.63
818	TRUE	P61225|RAP2B_HUMAN	7.65	22.95	4	3		Ras-related protein Rap-2b OS=Homo sapiens OX=9606 GN=RAP2B PE=1 SV=1	1855.72	1702.44	1788.77	1617.64	1852.85	1580.22	2985.94	3531.49
332	TRUE	P56199|ITA1_HUMAN	35.36	13.49	10	10	Carbamidomethylation; Oxidation (M)	Integrin alpha-1 OS=Homo sapiens OX=9606 GN=ITGA1 PE=1 SV=2	937.802	733.319	1939.67	1642.95	1946.02	4041.66	2231.19	1835.32
202	TRUE	Q9UKV3|ACINU_HUMAN	1.46	18.79	17	17	Acetylation (N-term); Carbamidomethylation	Apoptotic chromatin condensation inducer in the nucleus OS=Homo sapiens OX=9606 GN=ACIN1 PE=1 SV=2	5998.16	4255.38	3425.38	2983.36	2409.34	3060.67	3050.03	2510.36
407	TRUE	Q9ULV3|CIZ1_HUMAN	2.94	12.81	8	8		Cip1-interacting zinc finger protein OS=Homo sapiens OX=9606 GN=CIZ1 PE=1 SV=2	1851.09	1691.85	276.89	352.992	404.177	261.958	468.4	282.368
566	TRUE	Q9UL25|RAB21_HUMAN	0.79	36.44	7	6	Carbamidomethylation	Ras-related protein Rab-21 OS=Homo sapiens OX=9606 GN=RAB21 PE=1 SV=3	3367.86	3389.11	1274.58	920.307	2206.84	1161.07	1806.26	1889.74
595	TRUE	O00299|CLIC1_HUMAN	2.36	30.29	7	6	Carbamidomethylation; Oxidation (M)	Chloride intracellular channel protein 1 OS=Homo sapiens OX=9606 GN=CLIC1 PE=1 SV=4	11105.2	11122.9	4634.07	4968.96	9625.6	8283.57	6338.24	6764.63
598	TRUE	Q8N0X7|SPART_HUMAN	3.35	18.17	7	7		Spartin OS=Homo sapiens OX=9606 GN=SPART PE=1 SV=1	2498.23	2714.11	1380.02	1981.02	1673.58	1346.47	951.507	954.905
973	TRUE	P24666|PPAC_HUMAN	4.27	25.95	3	3		Low molecular weight phosphotyrosine protein phosphatase OS=Homo sapiens OX=9606 GN=ACP1 PE=1 SV=3	5114.63	4508.94	2422.23	2269.92	4581.59	3809.14	4441.72	3588.53
103	TRUE	P22223|CADH3_HUMAN	2.19	34.74	24	23	Oxidation (M)	Cadherin-3 OS=Homo sapiens OX=9606 GN=CDH3 PE=1 SV=2	34460	32263.4	32363.8	31978.9	32674.9	39950.3	24336.7	24448.6
876	TRUE	P46019|KPB2_HUMAN	0.41	4.05	3	3	Oxidation (M)	Phosphorylase b kinase regulatory subunit alpha, liver isoform OS=Homo sapiens OX=9606 GN=PHKA2 PE=1 SV=1	789.169	1112.43	366.473	313.03	423.459	455.815	499.177	521.489
942	TRUE	Q8NAN2|MIGA1_HUMAN	1.73	8.54	3	3		Mitoguardin 1 OS=Homo sapiens OX=9606 GN=MIGA1 PE=1 SV=1	1367.57	1352.64	145.956	198.888	618.925	317.474	703.524	713.453
603	TRUE	Q6N022|TEN4_HUMAN	5.66	2.82	7	6	Oxidation (M)	Teneurin-4 OS=Homo sapiens OX=9606 GN=TENM4 PE=1 SV=2	2326.28	2138.92	807.168	316.932	403.043	531.791	269.693	292.16
496	TRUE	P11413|G6PD_HUMAN	4.89	22.14	9	9	Carbamidomethylation	Glucose-6-phosphate 1-dehydrogenase OS=Homo sapiens OX=9606 GN=G6PD PE=1 SV=4	1913.73	1961.06	1191.95	1103.13	2037.58	1979.86	1653.82	1526.36
1151	TRUE	Q9UEY8|ADDG_HUMAN	5.87	2.83	2	2	Oxidation (M)	Gamma-adducin OS=Homo sapiens OX=9606 GN=ADD3 PE=1 SV=1	308.736	209.96	150.724	204.726	296.288	297.612	201.28	274.384
289	TRUE	P50570|DYN2_HUMAN	0.96	19.89	13	13	Carbamidomethylation; Oxidation (M)	Dynamin-2 OS=Homo sapiens OX=9606 GN=DNM2 PE=1 SV=2	1892.35	1820.84	1872.57	3088.33	1154.14	2925.44	1495.71	1951.54
857	TRUE	O15431|COPT1_HUMAN	6.82	15.79	2	2	Carbamidomethylation; Oxidation (M)	High affinity copper uptake protein 1 OS=Homo sapiens OX=9606 GN=SLC31A1 PE=1 SV=1	12967.9	15199.8	8067.91	11190.7	2461.24	6098.46	5803.86	7293.72
361	TRUE	P49023|PAXI_HUMAN	9.61	24.2	10	10	Carbamidomethylation; Oxidation (M)	Paxillin OS=Homo sapiens OX=9606 GN=PXN PE=1 SV=3	4377.31	3564.11	4861.23	4092.91	5981.42	4436.22	5190.06	5555.09
689	TRUE	Q96BM9|ARL8A_HUMAN	2.89	38.71	6	6	Oxidation (M)	ADP-ribosylation factor-like protein 8A OS=Homo sapiens OX=9606 GN=ARL8A PE=1 SV=1	3722.27	4359.03	1396.92	1402.05	3683.93	2205.13	2504.93	2900.49
119	TRUE	O75165|DJC13_HUMAN	14.46	14.53	24	24	Carbamidomethylation; Oxidation (M)	DnaJ homolog subfamily C member 13 OS=Homo sapiens OX=9606 GN=DNAJC13 PE=1 SV=5	1753.46	2050.63	2310.75	1524.13	625.116	1038.52	740.988	654.54
550	TRUE	Q8N884|CGAS_HUMAN	0.85	17.24	8	8	Oxidation (M)	Cyclic GMP-AMP synthase OS=Homo sapiens OX=9606 GN=CGAS PE=1 SV=2	3744.43	3161.78	1382.7	1497.24	3088.68	1615.68	2293.18	1362.42
432	TRUE	Q969P0|IGSF8_HUMAN	5.71	10.77	5	5		Immunoglobulin superfamily member 8 OS=Homo sapiens OX=9606 GN=IGSF8 PE=1 SV=1	1506.48	1313.19	855.106	936.734	2341.48	1121.49	1053.81	1935.4
311	TRUE	Q96KP1|EXOC2_HUMAN	0.88	13.85	10	10	Oxidation (M)	Exocyst complex component 2 OS=Homo sapiens OX=9606 GN=EXOC2 PE=1 SV=1	3906.73	3877.4	1474.42	1231.16	2307.08	1808.5	2322.44	1871.5
913	TRUE	Q8IY63|AMOL1_HUMAN	21.95	3.87	3	3		Angiomotin-like protein 1 OS=Homo sapiens OX=9606 GN=AMOTL1 PE=1 SV=1	421.682	331.948	0	0	103.387	101.285	165.208	122.426
34	TRUE	P13645|K1C10_HUMAN	13.37	53.08	39	37	Carbamidomethylation; Oxidation (M)	Keratin, type I cytoskeletal 10 OS=Homo sapiens OX=9606 GN=KRT10 PE=1 SV=6	73167.2	67018.3	72651.1	74600.4	100333	87777.8	147356	165686
140	TRUE	Q9UHB6|LIMA1_HUMAN	0.61	40.05	25	25	Oxidation (M)	LIM domain and actin-binding protein 1 OS=Homo sapiens OX=9606 GN=LIMA1 PE=1 SV=1	32325.8	35541.7	9235.61	10732.6	19659.4	15377.9	15117.9	14532.4
985	TRUE	P62942|FKB1A_HUMAN	0.43	25	2	2	Oxidation (M)	Peptidyl-prolyl cis-trans isomerase FKBP1A OS=Homo sapiens OX=9606 GN=FKBP1A PE=1 SV=2	1017.81	612.944	392.031	442.88	586.269	506.803	276.187	405.067
932	TRUE	O75689|ADAP1_HUMAN	14.2	9.36	4	3		Arf-GAP with dual PH domain-containing protein 1 OS=Homo sapiens OX=9606 GN=ADAP1 PE=1 SV=2	277.021	314.233	382.445	443.36	668.949	349.016	1188.68	1069.66
312	TRUE	O95359|TACC2_HUMAN	13.42	3.49	7	7	Oxidation (M)	Transforming acidic coiled-coil-containing protein 2 OS=Homo sapiens OX=9606 GN=TACC2 PE=1 SV=3	475.193	544.509	290.074	181.614	1179.24	618.302	1120.74	1449.38
235	TRUE	P32926|DSG3_HUMAN	31.12	20.82	15	15	Oxidation (M)	Desmoglein-3 OS=Homo sapiens OX=9606 GN=DSG3 PE=1 SV=2	1407.87	1083.91	1287.93	1470.94	6056.59	4454.51	4455.34	5810.65
840	TRUE	P11279|LAMP1_HUMAN	17.21	8.15	4	4		Lysosome-associated membrane glycoprotein 1 OS=Homo sapiens OX=9606 GN=LAMP1 PE=1 SV=3	2248.43	2446.74	4111.86	5003.15	4394.48	3571.74	6190.1	4362.08
67	TRUE	Q13308|PTK7_HUMAN	18.94	40.19	36	36	Carbamidomethylation; Oxidation (M)	Inactive tyrosine-protein kinase 7 OS=Homo sapiens OX=9606 GN=PTK7 PE=1 SV=2	32591.6	32101.6	36228.3	37221.2	62557.5	53702.3	61177.9	63408.1
728	TRUE	Q9UK41|VPS28_HUMAN	3.45	23.53	3	3	Acetylation (N-term); Oxidation (M)	Vacuolar protein sorting-associated protein 28 homolog OS=Homo sapiens OX=9606 GN=VPS28 PE=1 SV=1	3235.92	4616.96	1526.67	2274.64	4230.98	2778.48	2959.88	2694.05
273	TRUE	Q96TA1|NIBA2_HUMAN	0.09	21.85	11	11	Oxidation (M)	Protein Niban 2 OS=Homo sapiens OX=9606 GN=NIBAN2 PE=1 SV=3	2916.18	2939.95	912.443	1245.29	1845.44	1088.3	1140.25	1741.39
254	TRUE	Q08174|PCDH1_HUMAN	12.56	21.51	16	16	Oxidation (M)	Protocadherin-1 OS=Homo sapiens OX=9606 GN=PCDH1 PE=1 SV=2	1983.71	3136.09	1269.23	1574.5	4663.67	3543.68	3706.66	4817.88
924	TRUE	O94910|AGRL1_HUMAN	40.89	2.99	3	3	Oxidation (M)	Adhesion G protein-coupled receptor L1 OS=Homo sapiens OX=9606 GN=ADGRL1 PE=1 SV=1	240.557	229.596	70.9781	79.2747	0	0	0	0
1248	TRUE	Q15390|MTFR1_HUMAN	2.16	8.41	2	2		Mitochondrial fission regulator 1 OS=Homo sapiens OX=9606 GN=MTFR1 PE=1 SV=2	463.927	441.931	387.032	362.884	367.586	355.901	420.184	390.003
275	TRUE	O14936|CSKP_HUMAN	10.04	16.31	11	11		Peripheral plasma membrane protein CASK OS=Homo sapiens OX=9606 GN=CASK PE=1 SV=3	1038.43	918.708	639.057	297.451	1357.17	1107.5	1798.39	1450.21
90	TRUE	Q15075|EEA1_HUMAN	0.68	29.06	32	32	Oxidation (M)	Early endosome antigen 1 OS=Homo sapiens OX=9606 GN=EEA1 PE=1 SV=2	2516.37	2384.86	1187.56	1085.76	1901.62	662.453	1858.56	1958.81
128	TRUE	P04792|HSPB1_HUMAN	59.93	78.54	22	22	Oxidation (M)	Heat shock protein beta-1 OS=Homo sapiens OX=9606 GN=HSPB1 PE=1 SV=2	36270.6	34355.6	72923.2	73468.9	174330	211160	234316	193814
1055	TRUE	O00264|PGRC1_HUMAN	0.15	17.44	2	2		Membrane-associated progesterone receptor component 1 OS=Homo sapiens OX=9606 GN=PGRMC1 PE=1 SV=3	3879.36	3850.8	1717.88	1748.97	2237.07	2227.19	1844.27	1734.16
461	TRUE	Q9BQL6|FERM1_HUMAN	0.51	11.82	7	7	Oxidation (M)	Fermitin family homolog 1 OS=Homo sapiens OX=9606 GN=FERMT1 PE=1 SV=1	1089.83	503.027	499.867	914.609	785.063	508.217	505.792	386.04
518	TRUE	P35237|SPB6_HUMAN	1.76	29.79	8	8	Oxidation (M)	Serpin B6 OS=Homo sapiens OX=9606 GN=SERPINB6 PE=1 SV=3	1531.54	1717.36	803.575	529.869	1899.16	976.754	924.102	688.147
36	TRUE	P35222|CTNB1_HUMAN	2.98	54.42	41	34	Acetylation (N-term); Carbamidomethylation; Oxidation (M)	Catenin beta-1 OS=Homo sapiens OX=9606 GN=CTNNB1 PE=1 SV=1	65203.6	64439.6	120159	117279	79728.4	107116	81333.8	47909.3
1046	TRUE	P28908|TNR8_HUMAN	27.81	5.38	3	3		Tumor necrosis factor receptor superfamily member 8 OS=Homo sapiens OX=9606 GN=TNFRSF8 PE=1 SV=1	8453.88	8227.66	2747.32	3892.64	282.443	308.679	215.744	237.178
250	TRUE	O94973|AP2A2_HUMAN	4.64	11.08	12	7	Oxidation (M)	AP-2 complex subunit alpha-2 OS=Homo sapiens OX=9606 GN=AP2A2 PE=1 SV=2	1306.61	1636.56	529772	706.304	1424.84	1334.65	866.951	452.688
409	TRUE	P21281|VATB2_HUMAN	0.29	25.64	9	9	Carbamidomethylation; Oxidation (M)	V-type proton ATPase subunit B, brain isoform OS=Homo sapiens OX=9606 GN=ATP6V1B2 PE=1 SV=3	3540.31	3944.56	1526.16	1939.12	2237.76	1005.49	2324.5	2538.89
1014	TRUE	Q6UWB1|I27RA_HUMAN	15.26	5.82	2	2		Interleukin-27 receptor subunit alpha OS=Homo sapiens OX=9606 GN=IL27RA PE=1 SV=2	670.2	648.511	1651.89	1705.15	242.537	1053.02	224.293	154.001
421	TRUE	Q9UKA4|AKA11_HUMAN	0.18	4.89	7	7	Oxidation (M)	A-kinase anchor protein 11 OS=Homo sapiens OX=9606 GN=AKAP11 PE=1 SV=1	1255.02	1152.09	161.281	138.945	538.768	190.904	395.988	254.7
359	TRUE	Q96I99|SUCB2_HUMAN	1.13	30.32	11	11	Oxidation (M)	Succinate--CoA ligase [GDP-forming] subunit beta, mitochondrial OS=Homo sapiens OX=9606 GN=SUCLG2 PE=1 SV=2	1629.25	1875.06	4855.92	3546.2	1605.77	1176.81	2715.85	2806.34
48	TRUE	P35221|CTNA1_HUMAN	8.31	51.21	40	32	Acetylation (N-term); Carbamidomethylation; Oxidation (M)	Catenin alpha-1 OS=Homo sapiens OX=9606 GN=CTNNA1 PE=1 SV=1	88174.1	94158.5	101852	91949.4	125807	110657	100545	101955
585	TRUE	Q92673|SORL_HUMAN	6.28	2.03	3	3		Sortilin-related receptor OS=Homo sapiens OX=9606 GN=SORL1 PE=1 SV=2	143.436	195.535	3432.69	934.704	2644.04	834.039	705.322	640.292
544	TRUE	Q8TCT9|HM13_HUMAN	7.19	18.83	7	7	Oxidation (M)	Minor histocompatibility antigen H13 OS=Homo sapiens OX=9606 GN=HM13 PE=1 SV=1	4653.18	6121.27	6399.65	5476.44	6323.02	8135.28	5217.06	5209.99
687	TRUE	Q13671|RIN1_HUMAN	0.51	9.2	5	5		Ras and Rab interactor 1 OS=Homo sapiens OX=9606 GN=RIN1 PE=1 SV=4	2061.44	1871.6	943.371	781.244	1191.19	1190.57	627.841	922.682
813	TRUE	Q96MU7|YTDC1_HUMAN	2.18	6.46	4	4		YTH domain-containing protein 1 OS=Homo sapiens OX=9606 GN=YTHDC1 PE=1 SV=3	4432.62	4080.7	1197.6	269.314	848.609	378.387	800.739	1168.16
8	TRUE	P13647|K2C5_HUMAN	38.51	50.68	77	60	Carbamidomethylation; Oxidation (M)	Keratin, type II cytoskeletal 5 OS=Homo sapiens OX=9606 GN=KRT5 PE=1 SV=3	164103	159080	289702	294428	334989	409941	448732	359550
545	TRUE	Q5VWQ8|DAB2P_HUMAN	8.23	8.92	7	7	Oxidation (M)	Disabled homolog 2-interacting protein OS=Homo sapiens OX=9606 GN=DAB2IP PE=1 SV=2	978.698	820.184	567.989	787.109	1560.85	580.878	1842.09	2096.24
109	TRUE	Q8IWT6|LRC8A_HUMAN	0.84	42.35	28	27	Carbamidomethylation; Oxidation (M)	Volume-regulated anion channel subunit LRRC8A OS=Homo sapiens OX=9606 GN=LRRC8A PE=1 SV=1	32230.7	34173.3	16566.4	17171.2	15587.1	15081.5	18177.9	18721.1
413	TRUE	O75122|CLAP2_HUMAN	0.4	9.58	9	9	Oxidation (M)	CLIP-associating protein 2 OS=Homo sapiens OX=9606 GN=CLASP2 PE=1 SV=3	695.205	892.597	580.462	593.016	530.189	645.465	506.342	408.744
420	TRUE	P06744|G6PI_HUMAN	4.49	18.28	6	6	Oxidation (M)	Glucose-6-phosphate isomerase OS=Homo sapiens OX=9606 GN=GPI PE=1 SV=4	5129.2	4681.81	932.349	1976.86	1669.57	814.391	770.994	1139.27
587	TRUE	Q14108|SCRB2_HUMAN	1.27	4.6	2	2		Lysosome membrane protein 2 OS=Homo sapiens OX=9606 GN=SCARB2 PE=1 SV=2	324.99	432.952	2649.05	177.16	279.004	2323.88	322.53	316.339
516	TRUE	P01040|CYTA_HUMAN	16.48	36.73	3	3		Cystatin-A OS=Homo sapiens OX=9606 GN=CSTA PE=1 SV=1	635.906	627.096	807.532	821.934	1509.58	850.97	1422.34	1785.75
1064	TRUE	O60779|S19A2_HUMAN	5.17	11.67	3	3	Oxidation (M)	Thiamine transporter 1 OS=Homo sapiens OX=9606 GN=SLC19A2 PE=1 SV=2	1065.26	1175.18	214.669	174.677	135.437	58.0249	204.939	258.038
796	TRUE	P26012|ITB8_HUMAN	13.67	10.4	5	5	Oxidation (M)	Integrin beta-8 OS=Homo sapiens OX=9606 GN=ITGB8 PE=1 SV=1	1841.63	2025.96	2005.27	1793.68	2909.81	2476.79	3751.89	4414.01
70	TRUE	Q02952|AKA12_HUMAN	1.25	28.68	36	36	Oxidation (M)	A-kinase anchor protein 12 OS=Homo sapiens OX=9606 GN=AKAP12 PE=1 SV=4	6941.1	6732.59	893.466	1252.87	1725.61	2003.27	1401.09	1476.9
348	TRUE	P40763|STAT3_HUMAN	10.38	19.09	10	10	Oxidation (M)	Signal transducer and activator of transcription 3 OS=Homo sapiens OX=9606 GN=STAT3 PE=1 SV=2	796.139	854.343	1133.64	1114.2	624.724	434.79	568.864	408.509
226	TRUE	P42356|PI4KA_HUMAN	2.37	5.42	9	9	Oxidation (M)	Phosphatidylinositol 4-kinase alpha OS=Homo sapiens OX=9606 GN=PI4KA PE=1 SV=4	1058.06	1007.37	2437.46	1664.61	950.397	2637.89	313.434	839.154
562	TRUE	Q96RF0|SNX18_HUMAN	21.34	16.08	8	8	Oxidation (M)	Sorting nexin-18 OS=Homo sapiens OX=9606 GN=SNX18 PE=1 SV=2	495.395	524.888	1109.75	1106.44	2246.27	1219.52	1002.53	1344.11
367	TRUE	Q14254|FLOT2_HUMAN	3.82	22.43	7	7	Oxidation (M)	Flotillin-2 OS=Homo sapiens OX=9606 GN=FLOT2 PE=1 SV=2	2666.46	2737.7	1825.2	1941.87	2478.82	1977.41	2762.12	2666.08
661	TRUE	O95292|VAPB_HUMAN	11.81	30.04	7	6	Carbamidomethylation; Oxidation (M)	Vesicle-associated membrane protein-associated protein B/C OS=Homo sapiens OX=9606 GN=VAPB PE=1 SV=3	10846.6	11482.5	4969.53	6487.07	19079.3	14483.4	15891.2	21975.3
763	TRUE	P13747|HLAE_HUMAN	9.28	6.98	5	2		HLA class I histocompatibility antigen, alpha chain E OS=Homo sapiens OX=9606 GN=HLA-E PE=1 SV=4	369.282	470.148	355.516	216.514	654.818	517.644	410.639	699.537
445	TRUE	Q5D862|FILA2_HUMAN	10.22	0.96	2	2		Filaggrin-2 OS=Homo sapiens OX=9606 GN=FLG2 PE=1 SV=1	513.003	483.889	192.806	165.356	438.389	597.22	1015.18	1341.29
187	TRUE	Q15375|EPHA7_HUMAN	10.81	23.15	20	17	Oxidation (M)	Ephrin type-A receptor 7 OS=Homo sapiens OX=9606 GN=EPHA7 PE=1 SV=3	3765.55	4407.77	67347.8	67466	58348.5	38626.5	83994.8	29444.7
217	TRUE	O95782|AP2A1_HUMAN	0.2	14.02	15	10	Oxidation (M)	AP-2 complex subunit alpha-1 OS=Homo sapiens OX=9606 GN=AP2A1 PE=1 SV=3	1935.05	1956.77	2518.8	1486.22	1098.8	1959.67	1845.97	1288.66
198	TRUE	Q6P1M0|S27A4_HUMAN	3.18	30.48	18	18	Carbamidomethylation; Oxidation (M)	Long-chain fatty acid transport protein 4 OS=Homo sapiens OX=9606 GN=SLC27A4 PE=1 SV=1	3870.38	3855.98	4453.34	5526.72	4558.82	2919.85	5213.96	4409
783	TRUE	Q6Q0C0|TRAF7_HUMAN	0.13	7.01	4	4		E3 ubiquitin-protein ligase TRAF7 OS=Homo sapiens OX=9606 GN=TRAF7 PE=1 SV=1	506.112	592.485	401.824	316.727	335.8	368.764	374.167	335.919
1119	TRUE	Q9Y6W5|WASF2_HUMAN	10.44	6.43	2	2		Wiskott-Aldrich syndrome protein family member 2 OS=Homo sapiens OX=9606 GN=WASF2 PE=1 SV=3	656.248	424.329	301.532	311.511	937.516	573.634	699.274	978.18
610	TRUE	Q9Y4D1|DAAM1_HUMAN	0.16	4.92	5	5		Disheveled-associated activator of morphogenesis 1 OS=Homo sapiens OX=9606 GN=DAAM1 PE=1 SV=2	4514.81	4615.71	916.67	318.6	637.163	7108.34	919.621	685.076
553	TRUE	Q9HCM4|E41L5_HUMAN	14.54	9	7	5	Oxidation (M)	Band 4.1-like protein 5 OS=Homo sapiens OX=9606 GN=EPB41L5 PE=1 SV=3	841.912	860.471	956.025	1066.77	2173.48	968.351	2514.12	2674.62
793	TRUE	Q15599|NHRF2_HUMAN	0.04	17.51	4	4		Na(+)/H(+) exchange regulatory cofactor NHE-RF2 OS=Homo sapiens OX=9606 GN=SLC9A3R2 PE=1 SV=2	1587.11	1615.62	152.208	1110.25	621.288	1371.23	374.517	543.331
680	TRUE	P0CG48|UBC_HUMAN	5.86	5.84	4	4		Polyubiquitin-C OS=Homo sapiens OX=9606 GN=UBC PE=1 SV=3	105415	109307	52837.1	54504.1	141267	127436	82744.7	81721.5
535	TRUE	Q13464|ROCK1_HUMAN	6.14	3.47	5	4	Acetylation (N-term); Oxidation (M)	Rho-associated protein kinase 1 OS=Homo sapiens OX=9606 GN=ROCK1 PE=1 SV=1	440.145	516.597	1100.51	1162.48	651.773	563.926	305.39	409.293
586	TRUE	Q9UJU6|DBNL_HUMAN	1.92	22.56	7	7	Oxidation (M)	Drebrin-like protein OS=Homo sapiens OX=9606 GN=DBNL PE=1 SV=1	1288.25	1070.11	1758.57	1590.87	666.878	1159.01	1771.62	1926.5
104	TRUE	P33527|MRP1_HUMAN	2.8	22.93	25	25	Carbamidomethylation; Oxidation (M)	Multidrug resistance-associated protein 1 OS=Homo sapiens OX=9606 GN=ABCC1 PE=1 SV=3	2775.44	2808.95	5489.34	5776.8	1734.87	5104.07	2175.5	3045.53
681	TRUE	P62491|RB11A_HUMAN	7.8	30.56	6	6	Acetylation (N-term)	Ras-related protein Rab-11A OS=Homo sapiens OX=9606 GN=RAB11A PE=1 SV=3	3952.27	4036.03	3779.07	2747.8	3835.78	4903.03	4679.95	5204.58
901	TRUE	Q9NUT2|MITOS_HUMAN	6.69	7.35	4	4		Mitochondrial potassium channel ATP-binding subunit OS=Homo sapiens OX=9606 GN=ABCB8 PE=1 SV=3	1297.4	914.644	107.453	1172.88	217.233	48.7428	286.676	149.347
648	TRUE	O43570|CAH12_HUMAN	18.47	19.21	5	5	Oxidation (M)	Carbonic anhydrase 12 OS=Homo sapiens OX=9606 GN=CA12 PE=1 SV=1	6210.66	6409.22	5287.71	6166.57	1612.34	581.629	1263.86	1559.39
832	TRUE	Q9Y5V3|MAGD1_HUMAN	0.87	5.78	3	3		Melanoma-associated antigen D1 OS=Homo sapiens OX=9606 GN=MAGED1 PE=1 SV=3	702.229	1041.57	614.91	565.229	403.255	1593.53	245.305	389.973
209	TRUE	Q9Y6N7|ROBO1_HUMAN	33.27	16.54	19	19	Oxidation (M)	Roundabout homolog 1 OS=Homo sapiens OX=9606 GN=ROBO1 PE=1 SV=1	3138.8	3965.41	2774.86	2730.39	250.34	150.31	217.41	228.283
1120	TRUE	Q6P1M3|L2GL2_HUMAN	0.22	2.75	2	2		LLGL scribble cell polarity complex component 2 OS=Homo sapiens OX=9606 GN=LLGL2 PE=1 SV=2	342.186	348.14	664.988	747.137	149.646	1197.17	521.109	269.322
368	TRUE	P35232|PHB_HUMAN	0.12	47.06	9	9		Prohibitin OS=Homo sapiens OX=9606 GN=PHB PE=1 SV=1	12523.2	13277.2	7836.71	8216.67	10718.8	6400.82	7261.16	7824.27
677	TRUE	Q14141|SEPT6_HUMAN	1.74	14.29	6	5	Oxidation (M)	Septin-6 OS=Homo sapiens OX=9606 GN=SEPTIN6 PE=1 SV=4	2636.09	2495.85	568.193	577.267	1893.48	1055.91	1074.98	1338.49
124	TRUE	Q99959|PKP2_HUMAN	1.01	32.8	22	22	Carbamidomethylation; Oxidation (M)	Plakophilin-2 OS=Homo sapiens OX=9606 GN=PKP2 PE=1 SV=2	12644.3	12656.7	9443.56	9749.17	9274.05	7323.96	7019.16	8237.31
376	TRUE	P10620|MGST1_HUMAN	0.83	42.58	4	4	Carbamidomethylation; Oxidation (M)	Microsomal glutathione S-transferase 1 OS=Homo sapiens OX=9606 GN=MGST1 PE=1 SV=1	20476.8	19457.1	8938.32	11589.8	17906	13086.6	14566.1	7185.1
210	TRUE	Q8NI35|INADL_HUMAN	4.59	11.99	14	14		InaD-like protein OS=Homo sapiens OX=9606 GN=PATJ PE=1 SV=3	2494.5	2525.05	550.079	515.52	904.72	116.109	442.222	470.672
260	TRUE	P02787|TRFE_HUMAN	12.56	4.73	3	3		Serotransferrin OS=Homo sapiens OX=9606 GN=TF PE=1 SV=3	443.652	398.111	731.034	977.577	361.562	339.799	301.374	387.831
365	TRUE	Q9BZQ8|NIBA1_HUMAN	11.65	14.12	10	10	Oxidation (M)	Protein Niban 1 OS=Homo sapiens OX=9606 GN=NIBAN1 PE=1 SV=1	1086.69	1675.61	718.663	897.707	4371.53	2378.97	1210.35	2805.27
24	TRUE	Q9UPN3|MACF1_HUMAN	2.4	11.17	64	61	Oxidation (M)	Microtubule-actin cross-linking factor 1, isoforms 1/2/3/5 OS=Homo sapiens OX=9606 GN=MACF1 PE=1 SV=4	81295	96388.8	12541.3	1601.7	65184.1	8538.19	36783.7	63416
843	TRUE	P07858|CATB_HUMAN	11.42	14.75	3	3	Oxidation (M)	Cathepsin B OS=Homo sapiens OX=9606 GN=CTSB PE=1 SV=3	1416.78	1732.1	810.523	769.132	297.971	281.419	244.794	473.718
357	TRUE	O14786|NRP1_HUMAN	3.53	18.74	12	12	Oxidation (M)	Neuropilin-1 OS=Homo sapiens OX=9606 GN=NRP1 PE=1 SV=3	2487.64	2723.71	2437.05	2628.31	1094.9	1204.85	2200.18	1992.66
1001	TRUE	P04920|B3A2_HUMAN	1.2	1.93	2	2		Anion exchange protein 2 OS=Homo sapiens OX=9606 GN=SLC4A2 PE=1 SV=4	347.473	337.75	82.1315	64.6385	93.4883	138.144	135.447	55.7621
836	TRUE	Q86SQ4|AGRG6_HUMAN	1.79	4.75	4	4		Adhesion G-protein coupled receptor G6 OS=Homo sapiens OX=9606 GN=ADGRG6 PE=1 SV=3	625.256	623.466	706.064	779.415	438.506	478.381	830.254	791.455
493	TRUE	P61020|RAB5B_HUMAN	6.83	27.44	7	4	Oxidation (M)	Ras-related protein Rab-5B OS=Homo sapiens OX=9606 GN=RAB5B PE=1 SV=1	1374.13	1207.93	870.17	721.618	1362	1246.34	1621.09	1335.27
460	TRUE	Q13616|CUL1_HUMAN	2.37	12.11	7	7	Oxidation (M)	Cullin-1 OS=Homo sapiens OX=9606 GN=CUL1 PE=1 SV=2	3248.35	2838.48	322.514	4137.01	1001.28	2612.42	377.472	718.692
18	TRUE	Q00610|CLH1_HUMAN	0.23	39.16	65	50	Carbamidomethylation; Oxidation (M)	Clathrin heavy chain 1 OS=Homo sapiens OX=9606 GN=CLTC PE=1 SV=5	37539.8	42187.9	14366.1	13920.6	19131.3	12983.8	20105.6	20977.9
1016	TRUE	P14174|MIF_HUMAN	3.29	17.39	2	2	Carbamidomethylation; Oxidation (M)	Macrophage migration inhibitory factor OS=Homo sapiens OX=9606 GN=MIF PE=1 SV=4	2251.54	3224.51	373.779	386.93	361.15	1303.48	276.04	213.787
631	TRUE	P11532|DMD_HUMAN	5.16	0.54	5	2		Dystrophin OS=Homo sapiens OX=9606 GN=DMD PE=1 SV=3	422.655	479.457	299.941	320.488	645.711	613.514	280.396	385.029
426	TRUE	Q13641|TPBG_HUMAN	5.67	18.1	8	8	Oxidation (M)	Trophoblast glycoprotein OS=Homo sapiens OX=9606 GN=TPBG PE=1 SV=1	41702	34378.3	32116.3	32072.5	22256.3	27052.8	14639	14767.3
579	TRUE	Q9UHX3|AGRE2_HUMAN	25.8	8.75	5	5	Carbamidomethylation; Oxidation (M)	Adhesion G protein-coupled receptor E2 OS=Homo sapiens OX=9606 GN=ADGRE2 PE=1 SV=2	5424.03	5991.44	5942.3	7081.83	1190.53	2682.87	1101.33	904.069
141	TRUE	P46939|UTRO_HUMAN	2.23	4.11	15	11	Oxidation (M)	Utrophin OS=Homo sapiens OX=9606 GN=UTRN PE=1 SV=2	2256.94	807.641	456.236	3280.12	838.028	481.808	861.022	854.279
189	TRUE	P08237|PFKAM_HUMAN	4.19	23.46	15	15	Oxidation (M)	ATP-dependent 6-phosphofructokinase, muscle type OS=Homo sapiens OX=9606 GN=PFKM PE=1 SV=2	16526.9	15725.9	7061.35	7398.16	8847.86	6452.65	3771.41	3524.68
256	TRUE	P46821|MAP1B_HUMAN	0.96	4.86	9	9	Oxidation (M)	Microtubule-associated protein 1B OS=Homo sapiens OX=9606 GN=MAP1B PE=1 SV=2	1085.29	954.201	433.177	745.997	585.637	640.536	391.38	559.607
724	TRUE	Q8IXS6|PALM2_HUMAN	5.71	21.37	6	6		Paralemmin-2 OS=Homo sapiens OX=9606 GN=PALM2 PE=1 SV=3	4432.84	4807.61	355.75	897.001	637.193	161.267	491.266	525.872
47	TRUE	P68104|EF1A1_HUMAN	2.04	59.74	39	39	Acetylation (N-term); Carbamidomethylation; Oxidation (M)	Elongation factor 1-alpha 1 OS=Homo sapiens OX=9606 GN=EEF1A1 PE=1 SV=1	297262	343971	178436	223606	218084	218508	119215	121193
276	TRUE	P78310|CXAR_HUMAN	9.77	52.05	13	13	Acetylation (N-term); Carbamidomethylation; Oxidation (M)	Coxsackievirus and adenovirus receptor OS=Homo sapiens OX=9606 GN=CXADR PE=1 SV=1	4490.15	4806.14	4132.87	3337.3	7892.15	4658.42	7044.51	6517.73
988	TRUE	O15121|DEGS1_HUMAN	1.6	15.79	3	3	Oxidation (M)	Sphingolipid delta(4)-desaturase DES1 OS=Homo sapiens OX=9606 GN=DEGS1 PE=1 SV=1	2746.74	1136.24	386.758	289.429	897.726	730.035	675.016	1071.61
63	TRUE	Q9BSJ8|ESYT1_HUMAN	5.36	39.13	37	37	Carbamidomethylation; Oxidation (M)	Extended synaptotagmin-1 OS=Homo sapiens OX=9606 GN=ESYT1 PE=1 SV=1	17947.4	17423.4	11640	9596.75	16744.4	15255	19145.7	17438.6
1063	TRUE	Q00535|CDK5_HUMAN	0.55	11.99	3	3	Oxidation (M)	Cyclin-dependent-like kinase 5 OS=Homo sapiens OX=9606 GN=CDK5 PE=1 SV=3	385.605	442.296	290.024	632.312	306.957	327.702	438.689	225.445
341	TRUE	Q99623|PHB2_HUMAN	5.68	44.48	12	12	Oxidation (M)	Prohibitin-2 OS=Homo sapiens OX=9606 GN=PHB2 PE=1 SV=2	26201.8	27226.7	11869.1	11649	9303.89	7019.98	6484.82	8347.8
508	TRUE	P17706|PTN2_HUMAN	5.23	22.65	7	7	Oxidation (M)	Tyrosine-protein phosphatase non-receptor type 2 OS=Homo sapiens OX=9606 GN=PTPN2 PE=1 SV=2	1021.92	583.022	302.866	230.252	853.049	568.322	542.211	877.002
320	TRUE	P04899|GNAI2_HUMAN	0.59	25.63	11	7	Carbamidomethylation; Oxidation (M)	Guanine nucleotide-binding protein G(i) subunit alpha-2 OS=Homo sapiens OX=9606 GN=GNAI2 PE=1 SV=3	4816.83	5059.75	4157.93	2425.3	3074.38	2722.29	3814.55	3893.63
127	TRUE	Q5T9A4|ATD3B_HUMAN	3.57	37.5	22	22	Carbamidomethylation; Oxidation (M)	ATPase family AAA domain-containing protein 3B OS=Homo sapiens OX=9606 GN=ATAD3B PE=1 SV=1	26603.5	26535.7	14803.5	14727.1	12485.8	9947.99	10643	11220.5
110	TRUE	P23396|RS3_HUMAN	0.71	62.14	24	24	Carbamidomethylation; Oxidation (M)	40S ribosomal protein S3 OS=Homo sapiens OX=9606 GN=RPS3 PE=1 SV=2	147891	145758	182322	183163	126865	134638	148121	127130
606	TRUE	Q9BTW9|TBCD_HUMAN	0.51	5.45	5	5	Oxidation (M)	Tubulin-specific chaperone D OS=Homo sapiens OX=9606 GN=TBCD PE=1 SV=2	974.8	883.594	179.841	241.784	388.239	198.202	331.843	375.631
177	TRUE	Q460N5|PAR14_HUMAN	33.19	11.38	14	14	Oxidation (M)	Protein mono-ADP-ribosyltransferase PARP14 OS=Homo sapiens OX=9606 GN=PARP14 PE=1 SV=3	300.43	340.646	538.233	536.313	1924.97	1106.38	1493.17	2064.2
158	TRUE	O14974|MYPT1_HUMAN	1.12	22.04	18	18	Carbamidomethylation; Oxidation (M)	Protein phosphatase 1 regulatory subunit 12A OS=Homo sapiens OX=9606 GN=PPP1R12A PE=1 SV=1	11093.1	5405.82	2752.61	2436.83	9308.52	8413.73	2534.96	1788.44
593	TRUE	Q5T2T1|MPP7_HUMAN	7.22	19.1	8	8	Oxidation (M)	MAGUK p55 subfamily member 7 OS=Homo sapiens OX=9606 GN=MPP7 PE=1 SV=1	1758.87	1830.37	1320.65	1427	1838.54	1892.46	2144.57	2143.78
748	TRUE	Q8IWK6|AGRA3_HUMAN	1.1	3.94	4	4		Adhesion G protein-coupled receptor A3 OS=Homo sapiens OX=9606 GN=ADGRA3 PE=1 SV=2	5463.17	3942.11	715.015	767.42	2044.78	827.36	722.871	1407.49
756	TRUE	Q9H0H5|RGAP1_HUMAN	3.78	13.45	5	5	Oxidation (M)	Rac GTPase-activating protein 1 OS=Homo sapiens OX=9606 GN=RACGAP1 PE=1 SV=1	1967.74	2590.74	552.761	555.626	1806.02	707.163	2196.39	2823.05
76	TRUE	P14625|ENPL_HUMAN	1.02	39.1	28	27	Carbamidomethylation; Oxidation (M)	Endoplasmin OS=Homo sapiens OX=9606 GN=HSP90B1 PE=1 SV=1	40459.5	32480.4	28437.8	31848.5	30062.1	24114.6	25753.3	35376.4
416	TRUE	Q16181|SEPT7_HUMAN	4.71	26.09	8	8	Carbamidomethylation; Oxidation (M)	Septin-7 OS=Homo sapiens OX=9606 GN=SEPTIN7 PE=1 SV=2	5320.83	4898.84	1475.91	1217.89	5366.73	2859.92	3749.44	4804.74
282	TRUE	P63092|GNAS2_HUMAN	4.81	33.5	10	10	Oxidation (M)	Guanine nucleotide-binding protein G(s) subunit alpha isoforms short OS=Homo sapiens OX=9606 GN=GNAS PE=1 SV=1	4643.63	4958.32	1853.47	1838.23	4371.52	4401.08	3483.07	3970.92
14	TRUE	P07814|SYEP_HUMAN	0.3	58.8	75	75	Acetylation (N-term); Carbamidomethylation; Oxidation (M)	Bifunctional glutamate/proline--tRNA ligase OS=Homo sapiens OX=9606 GN=EPRS1 PE=1 SV=5	747814	776023	1.5337e+06	1.59112e+06	655360	897168	881817	1.10221e+06
925	TRUE	Q00587|BORG5_HUMAN	3.12	13.3	3	3	Oxidation (M)	Cdc42 effector protein 1 OS=Homo sapiens OX=9606 GN=CDC42EP1 PE=1 SV=1	3683.3	1697.97	332.65	324.697	531.101	207.218	428.401	412.485
506	TRUE	Q13131|AAPK1_HUMAN	3.79	15.92	8	8	Oxidation (M)	5'-AMP-activated protein kinase catalytic subunit alpha-1 OS=Homo sapiens OX=9606 GN=PRKAA1 PE=1 SV=4	3975.32	3948.98	2096.72	1559.49	4361.38	2800.66	3097.33	2848.85
397	TRUE	O95297|MPZL1_HUMAN	3.17	33.09	11	11	Carbamidomethylation	Myelin protein zero-like protein 1 OS=Homo sapiens OX=9606 GN=MPZL1 PE=1 SV=1	18921.9	29979.3	16455.4	16748.1	21986.9	16618.6	22204.7	23225
6	TRUE	P58107|EPIPL_HUMAN	8.65	23.9	110	87	Carbamidomethylation; Oxidation (M)	Epiplakin OS=Homo sapiens OX=9606 GN=EPPK1 PE=1 SV=3	36119.1	40250.9	20158.9	20186.5	41486.6	41583	49395.6	52594.1
150	TRUE	Q9UDY2|ZO2_HUMAN	4.43	23.45	22	22	Oxidation (M)	Tight junction protein ZO-2 OS=Homo sapiens OX=9606 GN=TJP2 PE=1 SV=2	2642.64	46751.8	40791.4	42342.1	27945.7	27101.5	38398.2	32595.6
690	TRUE	O75083|WDR1_HUMAN	8.81	17.66	5	5		WD repeat-containing protein 1 OS=Homo sapiens OX=9606 GN=WDR1 PE=1 SV=4	2268.67	1827.36	1786.43	1729.42	1476.91	893.474	308.562	586.073
284	TRUE	Q8TD16|BICD2_HUMAN	0.76	15.05	10	10	Oxidation (M)	Protein bicaudal D homolog 2 OS=Homo sapiens OX=9606 GN=BICD2 PE=1 SV=1	2473.21	2253.65	407.403	2463.47	1450.32	812.159	1084.5	989.932
97	TRUE	P00533|EGFR_HUMAN	0.43	26.36	28	26	Carbamidomethylation; Oxidation (M)	Epidermal growth factor receptor OS=Homo sapiens OX=9606 GN=EGFR PE=1 SV=2	34823.2	45650.3	28751.5	33097	24816.5	32885.4	24313	34553.8
685	TRUE	Q8N6H7|ARFG2_HUMAN	8.25	13.82	6	6	Oxidation (M)	ADP-ribosylation factor GTPase-activating protein 2 OS=Homo sapiens OX=9606 GN=ARFGAP2 PE=1 SV=1	515.371	557.287	612.853	609.475	2062.87	1220.45	374.459	677.225
2	TRUE	Q09666|AHNK_HUMAN	3.48	42.26	198	198	Acetylation (N-term); Carbamidomethylation; Oxidation (M)	Neuroblast differentiation-associated protein AHNAK OS=Homo sapiens OX=9606 GN=AHNAK PE=1 SV=2	107187	109617	509433	531460	213128	161529	288125	353801
319	TRUE	Q8IWA5|CTL2_HUMAN	8.82	19.26	13	13	Acetylation (N-term); Carbamidomethylation	Choline transporter-like protein 2 OS=Homo sapiens OX=9606 GN=SLC44A2 PE=1 SV=3	7542.86	7890.4	4708.69	4614.26	11729.5	12965.2	7121.09	7398.96
1049	TRUE	Q9UQ49|NEUR3_HUMAN	2.63	12.62	3	3		Sialidase-3 OS=Homo sapiens OX=9606 GN=NEU3 PE=1 SV=1	669.808	588.339	107.897	108.73	424.001	216.463	384.98	364.974
561	TRUE	P52799|EFNB2_HUMAN	4.15	13.81	4	3		Ephrin-B2 OS=Homo sapiens OX=9606 GN=EFNB2 PE=1 SV=1	2358.02	2130.76	700.427	855.413	1472.14	1453.48	2018.43	2238.05
402	TRUE	Q8TF72|SHRM3_HUMAN	6.33	3.96	6	6		Protein Shroom3 OS=Homo sapiens OX=9606 GN=SHROOM3 PE=1 SV=2	780.772	547.471	725.698	18310.1	834.121	293.048	469.099	319.707
653	TRUE	Q9H0B6|KLC2_HUMAN	0.26	6.75	3	3		Kinesin light chain 2 OS=Homo sapiens OX=9606 GN=KLC2 PE=1 SV=1	579.995	597.9	391.462	398.308	363.939	414.829	352.347	352.331
196	TRUE	Q9UM54|MYO6_HUMAN	2.18	16.92	16	16	Oxidation (M)	Unconventional myosin-VI OS=Homo sapiens OX=9606 GN=MYO6 PE=1 SV=4	1831.12	1872.85	499.773	714.717	903.001	611.31	289.324	754.303
261	TRUE	P53985|MOT1_HUMAN	1.17	14.4	11	11	Oxidation (M)	Monocarboxylate transporter 1 OS=Homo sapiens OX=9606 GN=SLC16A1 PE=1 SV=3	42627.4	40666.4	46651.6	46527.3	49327	37979.4	29748.4	35273.1
62	TRUE	Q9UIW2|PLXA1_HUMAN	4.4	21.47	36	25	Carbamidomethylation; Oxidation (M)	Plexin-A1 OS=Homo sapiens OX=9606 GN=PLXNA1 PE=1 SV=3	8686.31	8292.34	6653.75	7148.86	4273.75	4972.59	4668.87	4166.01
771	TRUE	O95786|DDX58_HUMAN	24.74	6.05	4	4		Antiviral innate immune response receptor RIG-I OS=Homo sapiens OX=9606 GN=DDX58 PE=1 SV=2	162.266	231.895	154.499	166.479	540.62	688.537	485.539	696.138
815	TRUE	Q92854|SEM4D_HUMAN	19.49	5.1	3	3		Semaphorin-4D OS=Homo sapiens OX=9606 GN=SEMA4D PE=1 SV=1	771.293	365.853	821.751	958.146	2363.61	983.357	1962.19	2072.03
219	TRUE	Q9Y6M7|S4A7_HUMAN	3.11	15.32	13	13	Oxidation (M)	Sodium bicarbonate cotransporter 3 OS=Homo sapiens OX=9606 GN=SLC4A7 PE=1 SV=2	5222.39	6848.94	699.561	653.991	1014.71	654.768	1015.43	697.027
758	TRUE	Q96RD7|PANX1_HUMAN	1.64	13.62	4	4	Oxidation (M)	Pannexin-1 OS=Homo sapiens OX=9606 GN=PANX1 PE=1 SV=4	4028.54	3858.68	867.349	1075.87	2217.5	1738.33	1955.76	2251.92
268	TRUE	Q9P0V3|SH3B4_HUMAN	2.56	22.95	16	16	Carbamidomethylation; Oxidation (M)	SH3 domain-binding protein 4 OS=Homo sapiens OX=9606 GN=SH3BP4 PE=1 SV=1	2611.78	2373.38	5761.41	1327.96	2531.69	2425.96	2602.29	2933.36
117	TRUE	Q8WUM4|PDC6I_HUMAN	11.01	34.22	25	25	Acetylation (N-term); Carbamidomethylation; Oxidation (M)	Programmed cell death 6-interacting protein OS=Homo sapiens OX=9606 GN=PDCD6IP PE=1 SV=1	8197.58	6472.54	9688.64	8522.53	3977.4	5679.43	3888.36	4204.36
423	TRUE	Q92597|NDRG1_HUMAN	11.3	26.4	7	7	Oxidation (M)	Protein NDRG1 OS=Homo sapiens OX=9606 GN=NDRG1 PE=1 SV=1	3741.48	3762.87	3431.16	2437.19	9358.34	8120.26	3572.6	4526.64
546	TRUE	Q9NQC3|RTN4_HUMAN	0.67	6.71	7	7	Carbamidomethylation	Reticulon-4 OS=Homo sapiens OX=9606 GN=RTN4 PE=1 SV=2	6724.19	6514.43	1000.06	1598.15	3416.91	1419.92	2809.72	3535.07
258	TRUE	P38606|VATA_HUMAN	1.55	26.58	12	12	Oxidation (M)	V-type proton ATPase catalytic subunit A OS=Homo sapiens OX=9606 GN=ATP6V1A PE=1 SV=2	6330.04	5671.86	1522.02	1611.23	3378.89	2539.5	2618.53	4306.47
574	TRUE	Q8IWU5|SULF2_HUMAN	17.26	8.97	6	6	Oxidation (M)	Extracellular sulfatase Sulf-2 OS=Homo sapiens OX=9606 GN=SULF2 PE=1 SV=1	500.721	605.188	858.545	862.086	3491.84	1601.27	836.279	1327.3
1009	TRUE	Q6PFW1|VIP1_HUMAN	11.39	1.74	2	2		Inositol hexakisphosphate and diphosphoinositol-pentakisphosphate kinase 1 OS=Homo sapiens OX=9606 GN=PPIP5K1 PE=1 SV=1	537.557	527.974	0	0	273.135	156.131	276.085	355.328
267	TRUE	P09211|GSTP1_HUMAN	3.37	54.76	11	11	Carbamidomethylation; Oxidation (M)	Glutathione S-transferase P OS=Homo sapiens OX=9606 GN=GSTP1 PE=1 SV=2	27687	27613.7	2470.2	4842.1	16174.4	19482	11136.7	14649.7
3	TRUE	P15924|DESP_HUMAN	10.63	42.63	109	109	Carbamidomethylation; Oxidation (M)	Desmoplakin OS=Homo sapiens OX=9606 GN=DSP PE=1 SV=3	24529.4	23659.5	12045.6	13655.7	33905.2	28445.7	35046.9	39339.7
1156	TRUE	O60906|NSMA_HUMAN	2.51	6.38	2	2		Sphingomyelin phosphodiesterase 2 OS=Homo sapiens OX=9606 GN=SMPD2 PE=1 SV=2	1014.32	1170.84	117.981	113.139	237.031	94.9725	111.696	243.793
688	TRUE	Q6EMK4|VASN_HUMAN	7.02	10.25	5	5		Vasorin OS=Homo sapiens OX=9606 GN=VASN PE=1 SV=1	2035.47	1763.27	844.846	1036.33	2794.68	1409.56	2085.7	2570.03
337	TRUE	P06396|GELS_HUMAN	2.89	17.77	9	9	Carbamidomethylation; Oxidation (M)	Gelsolin OS=Homo sapiens OX=9606 GN=GSN PE=1 SV=1	5248.14	6277.73	1631.5	1831.38	5825.86	3640.45	2745.74	3531.11
1065	TRUE	Q96QU8|XPO6_HUMAN	1.16	2.04	2	2		Exportin-6 OS=Homo sapiens OX=9606 GN=XPO6 PE=1 SV=1	582.769	676.921	162.252	220.99	505.555	337.52	374.23	185.114
821	TRUE	Q9UKE5|TNIK_HUMAN	22.7	4.34	5	5		TRAF2 and NCK-interacting protein kinase OS=Homo sapiens OX=9606 GN=TNIK PE=1 SV=1	1970.19	1605.91	1413.13	1609.92	5296.26	4021.47	5787.46	5572.31
236	TRUE	P04439|HLAA_HUMAN	29.71	20.27	13	7	Carbamidomethylation	HLA class I histocompatibility antigen, A alpha chain OS=Homo sapiens OX=9606 GN=HLA-A PE=1 SV=2	15987.9	15613.8	20590.4	21540.2	40696.3	56544.5	34412	29482
860	TRUE	Q9NNW5|WDR6_HUMAN	0.23	6.16	4	4	Carbamidomethylation	WD repeat-containing protein 6 OS=Homo sapiens OX=9606 GN=WDR6 PE=1 SV=1	1034.56	787.259	66.1947	64.8933	176.034	101.055	184.799	311.073
707	TRUE	O00161|SNP23_HUMAN	9.96	19.91	3	3	Oxidation (M)	Synaptosomal-associated protein 23 OS=Homo sapiens OX=9606 GN=SNAP23 PE=1 SV=1	844.99	1019.85	776.878	877.118	1311.54	1278.24	1079.83	1087.58
408	TRUE	Q15334|L2GL1_HUMAN	4.6	13.06	10	10	Carbamidomethylation; Oxidation (M)	Lethal(2) giant larvae protein homolog 1 OS=Homo sapiens OX=9606 GN=LLGL1 PE=1 SV=3	2216.82	1706.38	448.44	694.228	2646.01	805.132	1541.35	2335.76
938	TRUE	Q9BRK5|CAB45_HUMAN	5.95	10.77	3	3		45 kDa calcium-binding protein OS=Homo sapiens OX=9606 GN=SDF4 PE=1 SV=1	516.903	609.613	1111.5	822.654	558.746	728.581	271.806	343.813
635	TRUE	P13928|ANXA8_HUMAN	4.59	20.8	5	5	Oxidation (M)	Annexin A8 OS=Homo sapiens OX=9606 GN=ANXA8 PE=1 SV=3	480.696	414.23	535.183	354.105	323.136	675.352	599.856	356.553
1085	TRUE	P54105|ICLN_HUMAN	9.85	18.57	3	3	Oxidation (M)	Methylosome subunit pICln OS=Homo sapiens OX=9606 GN=CLNS1A PE=1 SV=1	4709.52	4468.99	2362.47	1620.55	662.184	1273.87	425.966	1303.89
1030	TRUE	Q01628|IFM3_HUMAN	22.59	30.83	2	2	Oxidation (M)	Interferon-induced transmembrane protein 3 OS=Homo sapiens OX=9606 GN=IFITM3 PE=1 SV=2	2740.58	4426.79	2239.03	2156.16	13411.5	12112.5	14919.4	8232.36
501	TRUE	P52292|IMA1_HUMAN	2.48	24.95	8	8	Oxidation (M)	Importin subunit alpha-1 OS=Homo sapiens OX=9606 GN=KPNA2 PE=1 SV=1	3118.57	3541.47	1007.1	1195.37	1852.87	1133.5	542.82	1009.05
302	TRUE	Q01518|CAP1_HUMAN	0.54	22.32	8	8	Carbamidomethylation; Oxidation (M)	Adenylyl cyclase-associated protein 1 OS=Homo sapiens OX=9606 GN=CAP1 PE=1 SV=5	1748.87	1339.13	497.164	560.161	901.038	606.125	912.592	712.254
1097	TRUE	Q13322|GRB10_HUMAN	4.56	4.88	2	2	Oxidation (M)	Growth factor receptor-bound protein 10 OS=Homo sapiens OX=9606 GN=GRB10 PE=1 SV=2	224.114	329.166	206.957	192.549	80.7266	142.574	145.218	156.228
375	TRUE	P31939|PUR9_HUMAN	0.99	17.57	7	7	Oxidation (M)	Bifunctional purine biosynthesis protein ATIC OS=Homo sapiens OX=9606 GN=ATIC PE=1 SV=3	1952.61	1259.5	651.872	1539.81	987.335	858.014	863.825	824.921
1249	TRUE	P84074|HPCA_HUMAN	4.55	10.88	2	2		Neuron-specific calcium-binding protein hippocalcin OS=Homo sapiens OX=9606 GN=HPCA PE=1 SV=2	196.547	209.952	188.877	304.319	250.587	271.917	198.98	167.577
279	TRUE	P18433|PTPRA_HUMAN	2.41	23.69	13	13	Oxidation (M)	Receptor-type tyrosine-protein phosphatase alpha OS=Homo sapiens OX=9606 GN=PTPRA PE=1 SV=3	2863.66	4403.67	2376.82	1942.44	2855.64	2067.76	3117.36	3382.69
133	TRUE	Q92974|ARHG2_HUMAN	8.15	31.24	22	22	Carbamidomethylation; Oxidation (M)	Rho guanine nucleotide exchange factor 2 OS=Homo sapiens OX=9606 GN=ARHGEF2 PE=1 SV=4	4698.09	4364.61	1828.81	1723.67	1009.81	1367.05	684.858	916.641
247	TRUE	Q12907|LMAN2_HUMAN	0.96	43.26	11	11	Carbamidomethylation; Oxidation (M)	Vesicular integral-membrane protein VIP36 OS=Homo sapiens OX=9606 GN=LMAN2 PE=1 SV=1	8543.16	8141.67	2015.12	2576.74	4138.26	2498.12	5072.21	5280.99
404	TRUE	Q8WVM8|SCFD1_HUMAN	0	21.81	9	9	Oxidation (M)	Sec1 family domain-containing protein 1 OS=Homo sapiens OX=9606 GN=SCFD1 PE=1 SV=4	1695.74	900.962	1074.85	1047.24	1227.5	436.64	874.479	1415.11
521	TRUE	Q9NYQ6|CELR1_HUMAN	11.24	3.42	8	7	Oxidation (M)	Cadherin EGF LAG seven-pass G-type receptor 1 OS=Homo sapiens OX=9606 GN=CELSR1 PE=1 SV=1	1293.37	1300.12	1071.04	1946.68	1395.2	2970.11	1534.9	2013.02
181	TRUE	Q08345|DDR1_HUMAN	8.77	23.55	16	16	Carbamidomethylation; Oxidation (M)	Epithelial discoidin domain-containing receptor 1 OS=Homo sapiens OX=9606 GN=DDR1 PE=1 SV=1	5603.08	6788.03	7642.31	8134.28	13890	6229.48	7282.05	13356
201	TRUE	P30530|UFO_HUMAN	2.7	17.11	13	12	Oxidation (M)	Tyrosine-protein kinase receptor UFO OS=Homo sapiens OX=9606 GN=AXL PE=1 SV=4	2046.7	1942.44	1322.35	1454.68	755.198	1513.15	981.517	1057.36
787	TRUE	Q8IWB1|IPRI_HUMAN	4.1	6.22	3	3	Oxidation (M)	Inositol 1,4,5-trisphosphate receptor-interacting protein OS=Homo sapiens OX=9606 GN=ITPRIP PE=1 SV=1	645.02	576.374	508.734	526.339	466.053	509.849	646.768	872.165
419	TRUE	Q15084|PDIA6_HUMAN	11.38	33.41	10	10		Protein disulfide-isomerase A6 OS=Homo sapiens OX=9606 GN=PDIA6 PE=1 SV=1	9374.22	8949.67	6917.58	8834.31	11949.5	13939.2	12016.5	11733.3
618	TRUE	O75976|CBPD_HUMAN	24.62	3.91	5	5		Carboxypeptidase D OS=Homo sapiens OX=9606 GN=CPD PE=1 SV=2	208.165	195.761	920.088	1104.31	1114.64	1091.56	1357.91	1308.34
620	TRUE	Q93050|VPP1_HUMAN	5.61	9.68	5	5	Oxidation (M)	V-type proton ATPase 116 kDa subunit a1 OS=Homo sapiens OX=9606 GN=ATP6V0A1 PE=1 SV=3	582.801	610.414	333.58	289.87	654.498	399.35	620.665	805.827
66	TRUE	P35580|MYH10_HUMAN	0.35	16.24	33	23	Carbamidomethylation; Oxidation (M)	Myosin-10 OS=Homo sapiens OX=9606 GN=MYH10 PE=1 SV=3	2825.11	3227.41	1128.02	1001.42	1616.25	1141.63	1508.49	1137.64
115	TRUE	Q8IZJ1|UNC5B_HUMAN	26.39	36.93	28	28	Carbamidomethylation; Oxidation (M)	Netrin receptor UNC5B OS=Homo sapiens OX=9606 GN=UNC5B PE=1 SV=2	5835.73	5485.18	3427.75	3963.35	30328.8	19828.9	31850.4	33467.6
795	TRUE	P07948|LYN_HUMAN	3.29	11.13	5	5	Oxidation (M)	Tyrosine-protein kinase Lyn OS=Homo sapiens OX=9606 GN=LYN PE=1 SV=3	2631.04	2789.28	779.316	976.845	782.621	354.786	898.761	1153.87
162	TRUE	Q14126|DSG2_HUMAN	2.65	30.41	23	23	Carbamidomethylation; Oxidation (M)	Desmoglein-2 OS=Homo sapiens OX=9606 GN=DSG2 PE=1 SV=2	7155	8128.68	2113.15	4966.6	5213.84	4058.88	8824.7	5229.72
760	TRUE	Q8WU76|SCFD2_HUMAN	5.18	10.82	6	6		Sec1 family domain-containing protein 2 OS=Homo sapiens OX=9606 GN=SCFD2 PE=1 SV=2	1879.66	1802.39	641.589	386.858	431.683	264.17	307.304	488.168
578	TRUE	Q9Y666|S12A7_HUMAN	1.83	4.99	5	4	Oxidation (M)	Solute carrier family 12 member 7 OS=Homo sapiens OX=9606 GN=SLC12A7 PE=1 SV=3	2241.42	2295.85	1269.3	1060.75	725.931	1512.01	1120.73	957.379
173	TRUE	O75146|HIP1R_HUMAN	1.31	22.57	19	18	Oxidation (M)	Huntingtin-interacting protein 1-related protein OS=Homo sapiens OX=9606 GN=HIP1R PE=1 SV=2	2297.64	2851.19	2067.66	2097.97	2063.05	1678.13	1728.09	1170.75
100	TRUE	Q13835|PKP1_HUMAN	30.32	41.9	26	26	Carbamidomethylation; Oxidation (M)	Plakophilin-1 OS=Homo sapiens OX=9606 GN=PKP1 PE=1 SV=2	7398.9	7909.65	4408.18	7454.05	41698.6	41728.7	51378.9	36768.5
827	TRUE	P61586|RHOA_HUMAN	0.02	11.4	3	2	Carbamidomethylation; Oxidation (M)	Transforming protein RhoA OS=Homo sapiens OX=9606 GN=RHOA PE=1 SV=1	2612.25	2394.68	1595.44	1088.77	4402.03	3537.64	485.575	546.535
619	TRUE	Q5T5U3|RHG21_HUMAN	20.61	1.53	3	3		Rho GTPase-activating protein 21 OS=Homo sapiens OX=9606 GN=ARHGAP21 PE=1 SV=2	415.092	311.415	997.532	468.687	211.63	92.4649	108.693	123.601
752	TRUE	P15151|PVR_HUMAN	6.44	13.67	4	4	Oxidation (M)	Poliovirus receptor OS=Homo sapiens OX=9606 GN=PVR PE=1 SV=2	23756.4	19676.7	23254.5	21278.4	12312.9	9679.42	13964.8	12442.4
137	TRUE	Q02413|DSG1_HUMAN	14.03	6.48	4	4	Oxidation (M)	Desmoglein-1 OS=Homo sapiens OX=9606 GN=DSG1 PE=1 SV=2	576.204	355.258	608.49	1011.83	611.938	801.527	1357.94	1097.28
95	TRUE	P04406|G3P_HUMAN	2.77	50.75	17	17	Carbamidomethylation; Oxidation (M)	Glyceraldehyde-3-phosphate dehydrogenase OS=Homo sapiens OX=9606 GN=GAPDH PE=1 SV=3	45718.8	41493	21217.3	18602.6	32436.7	31845.3	30784.3	31543.6
1072	TRUE	Q9Y508|RN114_HUMAN	22.8	9.65	2	2	Carbamidomethylation	E3 ubiquitin-protein ligase RNF114 OS=Homo sapiens OX=9606 GN=RNF114 PE=1 SV=1	451.561	433.767	0	0	186.371	186.38	119.97	85.9445
206	TRUE	P12235|ADT1_HUMAN	14.77	22.82	18	8	Acetylation (N-term); Carbamidomethylation; Oxidation (M)	ADP/ATP translocase 1 OS=Homo sapiens OX=9606 GN=SLC25A4 PE=1 SV=4	12529.7	12371.7	23998.5	24583.8	16490.1	17896.5	23617.6	20800.6
68	TRUE	P08581|MET_HUMAN	7.28	30.65	34	34	Carbamidomethylation; Oxidation (M)	Hepatocyte growth factor receptor OS=Homo sapiens OX=9606 GN=MET PE=1 SV=4	23362.7	23354.5	24357.3	24328.1	28737.5	30262.5	24960.3	22322.4
455	TRUE	Q14156|EFR3A_HUMAN	0.68	10.72	6	6	Oxidation (M)	Protein EFR3 homolog A OS=Homo sapiens OX=9606 GN=EFR3A PE=1 SV=2	1461.39	1910.8	963.787	961.757	1088.59	878.87	1079.27	1338.33
837	TRUE	P36404|ARL2_HUMAN	3.48	36.41	5	5	Oxidation (M)	ADP-ribosylation factor-like protein 2 OS=Homo sapiens OX=9606 GN=ARL2 PE=1 SV=4	1526.04	1364.74	966.729	928.277	861.042	1334.73	1077.55	2264.55
1171	TRUE	Q9UKG1|DP13A_HUMAN	6.54	4.65	2	2		DCC-interacting protein 13-alpha OS=Homo sapiens OX=9606 GN=APPL1 PE=1 SV=1	131.628	171.785	208.531	151.359	53.558	162.531	92.7028	82.8767
926	TRUE	P21860|ERBB3_HUMAN	9.12	2.98	3	3		Receptor tyrosine-protein kinase erbB-3 OS=Homo sapiens OX=9606 GN=ERBB3 PE=1 SV=1	360.808	390.587	204.856	256.977	425.018	418.755	567.58	492.35
316	TRUE	Q16555|DPYL2_HUMAN	15.27	34.27	11	11	Oxidation (M)	Dihydropyrimidinase-related protein 2 OS=Homo sapiens OX=9606 GN=DPYSL2 PE=1 SV=1	1783.45	1696.79	7794.81	13512.1	1430.43	666.843	1312	1175.3
712	TRUE	P13929|ENOB_HUMAN	12.6	6.22	4	2	Oxidation (M)	Beta-enolase OS=Homo sapiens OX=9606 GN=ENO3 PE=1 SV=5	208.253	225.848	153.318	450.901	362.247	302.788	1136.09	1189.15
519	TRUE	P36507|MP2K2_HUMAN	2.05	23.75	8	7	Oxidation (M)	Dual specificity mitogen-activated protein kinase kinase 2 OS=Homo sapiens OX=9606 GN=MAP2K2 PE=1 SV=1	4695.38	4586.75	2375.21	2549.31	3582.92	2320.9	3658.53	4320.86
611	TRUE	P21964|COMT_HUMAN	4.83	23.62	4	4	Carbamidomethylation; Oxidation (M)	Catechol O-methyltransferase OS=Homo sapiens OX=9606 GN=COMT PE=1 SV=2	7645	7695.84	3287.52	3049.88	1864.82	1508.8	2695.63	3059.34
718	TRUE	Q8IZP0|ABI1_HUMAN	18.74	16.34	6	6	Carbamidomethylation; Oxidation (M)	Abl interactor 1 OS=Homo sapiens OX=9606 GN=ABI1 PE=1 SV=4	1139.01	1097.4	728.448	579.442	2968.36	6614.69	2355.87	1940.47
23	TRUE	P05787|K2C8_HUMAN	0.27	61.28	49	37	Oxidation (M)	Keratin, type II cytoskeletal 8 OS=Homo sapiens OX=9606 GN=KRT8 PE=1 SV=7	97314.3	100054	30199.7	35586.7	43927.8	37899.8	50092.5	57890
199	TRUE	Q9H4M9|EHD1_HUMAN	3.56	30.52	18	12	Oxidation (M)	EH domain-containing protein 1 OS=Homo sapiens OX=9606 GN=EHD1 PE=1 SV=2	3260.74	3352.84	978.101	2531.82	2454.52	2490.14	2888.67	3092.25
1197	TRUE	Q99720|SGMR1_HUMAN	0.35	13.9	2	2		Sigma non-opioid intracellular receptor 1 OS=Homo sapiens OX=9606 GN=SIGMAR1 PE=1 SV=1	1406.02	1521.21	571.953	555.811	702.189	364.659	812.155	994.527
22	TRUE	Q9NYQ8|FAT2_HUMAN	23.1	24.37	75	75	Oxidation (M)	Protocadherin Fat 2 OS=Homo sapiens OX=9606 GN=FAT2 PE=1 SV=2	1832.7	2755.18	6012.66	1413.1	10505.5	8045.96	14497.1	15418.8
183	TRUE	Q9H4L5|OSBL3_HUMAN	4.17	27.62	18	18	Carbamidomethylation; Oxidation (M)	Oxysterol-binding protein-related protein 3 OS=Homo sapiens OX=9606 GN=OSBPL3 PE=1 SV=1	5510.85	3588.94	2027.82	2224.87	1629.62	2207.32	1088.46	1509.81
627	TRUE	P27797|CALR_HUMAN	2.28	21.58	6	6		Calreticulin OS=Homo sapiens OX=9606 GN=CALR PE=1 SV=1	1355.52	1570.01	1885.33	1912.19	956.004	1098.71	2719.4	2201.52
96	TRUE	Q29RF7|PDS5A_HUMAN	8.13	26.93	27	27	Carbamidomethylation; Oxidation (M)	Sister chromatid cohesion protein PDS5 homolog A OS=Homo sapiens OX=9606 GN=PDS5A PE=1 SV=1	6073.97	5799.77	1943.12	1802.05	7438.99	6473.91	6485.04	6414.77
237	TRUE	Q96J84|KIRR1_HUMAN	4.32	24.97	14	14	Oxidation (M)	Kin of IRRE-like protein 1 OS=Homo sapiens OX=9606 GN=KIRREL1 PE=1 SV=2	3532.95	2256.65	2594.79	2684.75	2919.41	2351.57	3442.21	2953.8
465	TRUE	P04040|CATA_HUMAN	4.66	15.94	6	6	Carbamidomethylation	Catalase OS=Homo sapiens OX=9606 GN=CAT PE=1 SV=3	1019.67	1219.38	299.063	74.764	610.656	495.847	1165.17	1285.8
473	TRUE	P78536|ADA17_HUMAN	6.52	12.5	8	8	Oxidation (M)	Disintegrin and metalloproteinase domain-containing protein 17 OS=Homo sapiens OX=9606 GN=ADAM17 PE=1 SV=1	8826.79	6414.55	9205.97	8956.53	8243.5	7514.85	10752.2	9814.75
57	TRUE	Q14008|CKAP5_HUMAN	1.37	26.38	46	46	Carbamidomethylation; Oxidation (M)	Cytoskeleton-associated protein 5 OS=Homo sapiens OX=9606 GN=CKAP5 PE=1 SV=3	3355.99	3024.71	5593.18	5174.94	2577.35	2430.04	6105.23	1980.26
1078	TRUE	Q9BRK4|LZTS2_HUMAN	2.54	4.78	2	2		Leucine zipper putative tumor suppressor 2 OS=Homo sapiens OX=9606 GN=LZTS2 PE=1 SV=2	390.601	374.8	141.462	2783.51	393.887	236.234	194.206	247.74
835	TRUE	Q14114|LRP8_HUMAN	5.21	4.05	3	3		Low-density lipoprotein receptor-related protein 8 OS=Homo sapiens OX=9606 GN=LRP8 PE=1 SV=4	1020.05	1253.71	313.477	415.674	921.439	975.941	948.798	993.845
742	TRUE	Q6ZRP7|QSOX2_HUMAN	0.68	11.32	6	6		Sulfhydryl oxidase 2 OS=Homo sapiens OX=9606 GN=QSOX2 PE=1 SV=3	1478.66	1502.6	90.1555	384.883	361.934	406.757	539.481	745.751
630	TRUE	O75116|ROCK2_HUMAN	1.28	3.24	4	3	Oxidation (M)	Rho-associated protein kinase 2 OS=Homo sapiens OX=9606 GN=ROCK2 PE=1 SV=4	226.414	262.83	889.536	775.508	333.066	264.036	188.071	2180.24
533	TRUE	P21796|VDAC1_HUMAN	7.62	43.46	9	9		Voltage-dependent anion-selective channel protein 1 OS=Homo sapiens OX=9606 GN=VDAC1 PE=1 SV=2	5306.27	5506.49	6622.68	6360.11	2889.65	4228.46	3638.01	3416.24
670	TRUE	Q9HBM0|VEZA_HUMAN	7.52	7.7	5	5	Oxidation (M)	Vezatin OS=Homo sapiens OX=9606 GN=VEZT PE=1 SV=3	1365.42	1703.13	541.764	502.698	1598.48	1521.75	1709.63	1727.63
1213	TRUE	Q86UN2|R4RL1_HUMAN	15.93	5.9	2	2		Reticulon-4 receptor-like 1 OS=Homo sapiens OX=9606 GN=RTN4RL1 PE=1 SV=1	208.736	608.345	308.526	275.074	0	56.8683	28.0441	0
178	TRUE	Q9Y4B5|MTCL1_HUMAN	0.53	11.92	18	18	Oxidation (M)	Microtubule cross-linking factor 1 OS=Homo sapiens OX=9606 GN=MTCL1 PE=1 SV=5	1256.73	1464.52	453.082	417.331	876.144	605.981	431.486	410.202
491	TRUE	Q9UKS6|PACN3_HUMAN	1.73	24.29	8	8	Oxidation (M)	Protein kinase C and casein kinase substrate in neurons protein 3 OS=Homo sapiens OX=9606 GN=PACSIN3 PE=1 SV=2	10133.7	2760.35	3952.62	4177.57	3672.63	5899.14	3752.84	4576.46
322	TRUE	P08648|ITA5_HUMAN	8.95	19.45	14	14	Oxidation (M)	Integrin alpha-5 OS=Homo sapiens OX=9606 GN=ITGA5 PE=1 SV=2	14738.2	14893.2	7473.37	4373.72	24250.3	22078.6	14858	15048
231	TRUE	Q92797|SYMPK_HUMAN	2.67	15.78	14	14	Oxidation (M)	Symplekin OS=Homo sapiens OX=9606 GN=SYMPK PE=1 SV=2	3045.31	3085.58	641.843	406.67	2538.87	1127.03	1614.78	1584.4
386	TRUE	Q99714|HCD2_HUMAN	3.43	68.2	10	10	Oxidation (M)	3-hydroxyacyl-CoA dehydrogenase type-2 OS=Homo sapiens OX=9606 GN=HSD17B10 PE=1 SV=3	2525.27	2569.22	569.062	851.277	2545.07	1027.92	2362.64	1680.99
977	TRUE	Q96D53|COQ8B_HUMAN	11.45	6.62	2	2		Atypical kinase COQ8B, mitochondrial OS=Homo sapiens OX=9606 GN=COQ8B PE=1 SV=2	84.4256	157.256	451.74	114.65	232.762	506.136	367.048	152.323
872	TRUE	O43865|SAHH2_HUMAN	0.14	8.87	4	4	Carbamidomethylation; Oxidation (M)	S-adenosylhomocysteine hydrolase-like protein 1 OS=Homo sapiens OX=9606 GN=AHCYL1 PE=1 SV=2	1025.7	2426.97	817.863	673.33	1126.67	393.823	929.886	1158.6
436	TRUE	Q8N3R9|MPP5_HUMAN	3.43	21.19	10	10	Oxidation (M)	MAGUK p55 subfamily member 5 OS=Homo sapiens OX=9606 GN=MPP5 PE=1 SV=3	1061.56	977.177	757.982	748.841	865.179	917.604	947.006	859.63
494	TRUE	O60291|MGRN1_HUMAN	0.05	20.29	8	8	Oxidation (M)	E3 ubiquitin-protein ligase MGRN1 OS=Homo sapiens OX=9606 GN=MGRN1 PE=1 SV=2	4686.37	4719.02	706.019	1006.41	1791.68	850.531	1854.61	2045.35
415	TRUE	P10321|HLAC_HUMAN	17.18	10.66	8	3	Carbamidomethylation	HLA class I histocompatibility antigen, C alpha chain OS=Homo sapiens OX=9606 GN=HLA-C PE=1 SV=3	6091.83	6133.62	9742.31	13923.3	4734.47	4664.57	2480.07	1658.81
30	TRUE	P49368|TCPG_HUMAN	8.76	72.11	47	47	Carbamidomethylation; Oxidation (M)	T-complex protein 1 subunit gamma OS=Homo sapiens OX=9606 GN=CCT3 PE=1 SV=4	134256	129080	138691	139380	163651	146205	169620	173286
965	TRUE	Q13572|ITPK1_HUMAN	2.41	8.21	2	2		Inositol-tetrakisphosphate 1-kinase OS=Homo sapiens OX=9606 GN=ITPK1 PE=1 SV=2	170.964	205.951	116.276	112.335	196.551	59.444	228.202	249.763
383	TRUE	P15531|NDKA_HUMAN	0.58	47.37	8	8	Oxidation (M)	Nucleoside diphosphate kinase A OS=Homo sapiens OX=9606 GN=NME1 PE=1 SV=1	11619.5	10661.1	1369.69	1488.45	6762.66	3700.09	2282.1	2994.24
732	TRUE	Q01831|XPC_HUMAN	7.69	7.02	5	5	Oxidation (M)	DNA repair protein complementing XP-C cells OS=Homo sapiens OX=9606 GN=XPC PE=1 SV=4	843.97	767.14	81.7519	78.0349	75.7071	43.7639	47.3624	32.5636
632	TRUE	O15260|SURF4_HUMAN	1.59	19.7	4	4	Oxidation (M)	Surfeit locus protein 4 OS=Homo sapiens OX=9606 GN=SURF4 PE=1 SV=3	7394.74	7450.28	3667.86	3146.98	3434.69	2020.44	3348.03	4483.73
287	TRUE	Q04917|1433F_HUMAN	15.02	28.86	6	6	Oxidation (M)	14-3-3 protein eta OS=Homo sapiens OX=9606 GN=YWHAH PE=1 SV=4	7066.08	7008.34	8392.61	7403.81	11765	12450	9724.04	8809.61
102	TRUE	P06756|ITAV_HUMAN	1.4	27.86	25	25	Carbamidomethylation; Oxidation (M)	Integrin alpha-V OS=Homo sapiens OX=9606 GN=ITGAV PE=1 SV=2	26141	25906.1	35758.5	34713.8	21340.1	21287.8	23058.3	23952.5
228	TRUE	P23471|PTPRZ_HUMAN	16.29	8.42	15	15	Oxidation (M)	Receptor-type tyrosine-protein phosphatase zeta OS=Homo sapiens OX=9606 GN=PTPRZ1 PE=1 SV=4	1177.6	1155.12	1317.28	941.4	1579	2121.6	2374.32	2336.26
663	TRUE	P10301|RRAS_HUMAN	2.26	27.98	6	5		Ras-related protein R-Ras OS=Homo sapiens OX=9606 GN=RRAS PE=1 SV=1	6517.27	6567.73	3216.31	2977.67	3333.91	2527.78	3147.32	2073.58
802	TRUE	Q29980|MICB_HUMAN	4.54	14.88	3	3	Oxidation (M)	MHC class I polypeptide-related sequence B OS=Homo sapiens OX=9606 GN=MICB PE=1 SV=2	973.476	850.19	395.871	207.071	335.14	85.1652	250.027	225.909
395	TRUE	Q06481|APLP2_HUMAN	8.42	21.1	12	12	Oxidation (M)	Amyloid-like protein 2 OS=Homo sapiens OX=9606 GN=APLP2 PE=1 SV=2	1560.92	3267.55	1283.27	1479.01	3038.18	2077.98	3118.98	4051.67
1061	TRUE	Q9BZM5|ULBP2_HUMAN	5.62	12.6	3	3		UL16-binding protein 2 OS=Homo sapiens OX=9606 GN=ULBP2 PE=1 SV=1	251.361	228.432	1009.35	1056.77	424.164	1538.24	310.628	613.229
442	TRUE	O75330|HMMR_HUMAN	1.2	17.54	10	10		Hyaluronan mediated motility receptor OS=Homo sapiens OX=9606 GN=HMMR PE=1 SV=2	483.653	532.91	4037.32	4037.18	455.41	3090.01	1589.77	1378.88
660	TRUE	Q9UEW8|STK39_HUMAN	7.41	15.96	6	6	Oxidation (M)	STE20/SPS1-related proline-alanine-rich protein kinase OS=Homo sapiens OX=9606 GN=STK39 PE=1 SV=3	5041.84	5130.69	1919.5	2077.13	7426.13	4448.06	4422.58	7259.67
463	TRUE	Q9H307|PININ_HUMAN	5.74	15.2	9	9	Oxidation (M)	Pinin OS=Homo sapiens OX=9606 GN=PNN PE=1 SV=5	2817.58	2188.29	1913.8	2105.58	1679.86	2707.93	4037.51	2919.09
505	TRUE	Q9NR80|ARHG4_HUMAN	0.01	14.49	8	8	Oxidation (M)	Rho guanine nucleotide exchange factor 4 OS=Homo sapiens OX=9606 GN=ARHGEF4 PE=1 SV=3	1724.61	1517.33	3767.28	547.917	1230.53	889.602	1127.99	1679.46
88	TRUE	Q14160|SCRIB_HUMAN	6.15	29.45	31	31	Oxidation (M)	Protein scribble homolog OS=Homo sapiens OX=9606 GN=SCRIB PE=1 SV=4	6508.94	6530.83	3748.13	2712.63	6045.18	6365.65	6049.99	7570.41
229	TRUE	Q9Y624|JAM1_HUMAN	5.87	49.5	15	15	Carbamidomethylation; Oxidation (M)	Junctional adhesion molecule A OS=Homo sapiens OX=9606 GN=F11R PE=1 SV=1	39641.7	34757.4	39696.1	38542.3	42147.5	43790.5	36644.3	37257.1
32	TRUE	Q14573|ITPR3_HUMAN	3.96	22.76	49	45	Carbamidomethylation; Oxidation (M)	Inositol 1,4,5-trisphosphate receptor type 3 OS=Homo sapiens OX=9606 GN=ITPR3 PE=1 SV=2	8331.76	8366.48	2428.8	2120.24	5140.19	4189.23	8904.38	7537.13
497	TRUE	Q9NYT0|PLEK2_HUMAN	12.22	20.4	6	6	Acetylation (N-term); Oxidation (M)	Pleckstrin-2 OS=Homo sapiens OX=9606 GN=PLEK2 PE=1 SV=1	13307.6	11795.4	12472.8	11631.9	1080.53	16363.8	423.591	961.807
1051	TRUE	Q9P246|STIM2_HUMAN	2.56	3.62	2	2	Oxidation (M)	Stromal interaction molecule 2 OS=Homo sapiens OX=9606 GN=STIM2 PE=1 SV=2	455.163	429.727	410.024	161.748	434.179	304.801	299.501	397.859
640	TRUE	Q13418|ILK_HUMAN	6.17	15.49	6	6	Oxidation (M)	Integrin-linked protein kinase OS=Homo sapiens OX=9606 GN=ILK PE=1 SV=2	3844.71	4721.02	2594.64	2398.68	3921.24	4110.54	4618.15	4709.17
145	TRUE	Q9Y5S2|MRCKB_HUMAN	18.11	15.43	23	23	Oxidation (M)	Serine/threonine-protein kinase MRCK beta OS=Homo sapiens OX=9606 GN=CDC42BPB PE=1 SV=2	733.129	828.69	1085.8	1062.65	973.088	1719.56	2691.14	2250.96
43	TRUE	O15031|PLXB2_HUMAN	6.65	32.15	48	47	Carbamidomethylation; Oxidation (M)	Plexin-B2 OS=Homo sapiens OX=9606 GN=PLXNB2 PE=1 SV=3	30010.2	28160.1	21542.1	19600.4	36913	26105.9	31387.1	34097.7
381	TRUE	Q9NTJ5|SAC1_HUMAN	0.53	21.29	11	11	Oxidation (M)	Phosphatidylinositol-3-phosphatase SAC1 OS=Homo sapiens OX=9606 GN=SACM1L PE=1 SV=2	1691.03	1431.12	3148.5	322.832	391.015	2634.52	844.624	724.962
1070	TRUE	P55283|CADH4_HUMAN	11.35	2.62	3	2		Cadherin-4 OS=Homo sapiens OX=9606 GN=CDH4 PE=2 SV=2	79.0386	25.4468	223.782	0	238.983	279.99	165.671	95.6848
60	TRUE	P53618|COPB_HUMAN	0.28	47.32	37	37	Carbamidomethylation; Oxidation (M)	Coatomer subunit beta OS=Homo sapiens OX=9606 GN=COPB1 PE=1 SV=3	24829.8	24784.3	11655.1	15941.6	15964.7	15578.3	13283.4	15274.5
245	TRUE	P04083|ANXA1_HUMAN	6.08	43.06	10	10	Oxidation (M)	Annexin A1 OS=Homo sapiens OX=9606 GN=ANXA1 PE=1 SV=2	6236.2	5668.28	5490.35	5499.16	8122.71	7093.87	5489.44	5415.02
1000	TRUE	Q13642|FHL1_HUMAN	6.14	11.15	3	3	Carbamidomethylation	Four and a half LIM domains protein 1 OS=Homo sapiens OX=9606 GN=FHL1 PE=1 SV=4	4090.72	3537.93	1812.84	2679.96	1497.74	2106.41	930.703	1038.29
186	TRUE	O00429|DNM1L_HUMAN	0.06	33.02	16	16	Oxidation (M)	Dynamin-1-like protein OS=Homo sapiens OX=9606 GN=DNM1L PE=1 SV=2	2187.49	2189.21	3301.47	473.664	765.452	2564.6	1244.19	1136.67
293	TRUE	Q8NFD5|ARI1B_HUMAN	3.4	6.44	10	10		AT-rich interactive domain-containing protein 1B OS=Homo sapiens OX=9606 GN=ARID1B PE=1 SV=2	2750.47	2613.17	1016.54	4158.49	2094.5	6616.12	1764.37	2219.48
1023	TRUE	Q14289|FAK2_HUMAN	8.4	4.26	3	3		Protein-tyrosine kinase 2-beta OS=Homo sapiens OX=9606 GN=PTK2B PE=1 SV=2	514.534	308.096	292.474	328.557	420.273	561.558	420.999	549.136
212	TRUE	Q6UVK1|CSPG4_HUMAN	21.35	5.99	9	9	Oxidation (M)	Chondroitin sulfate proteoglycan 4 OS=Homo sapiens OX=9606 GN=CSPG4 PE=1 SV=2	968.583	2447.58	1681.36	1309.31	149.147	528.504	294.966	111.129
702	TRUE	P15260|INGR1_HUMAN	7.75	18	6	6		Interferon gamma receptor 1 OS=Homo sapiens OX=9606 GN=IFNGR1 PE=1 SV=1	2226.34	2209.1	1391.22	1023.66	2058.09	2665.89	2536.01	2754.11
874	TRUE	P48067|SC6A9_HUMAN	9.65	7.51	4	4		Sodium- and chloride-dependent glycine transporter 1 OS=Homo sapiens OX=9606 GN=SLC6A9 PE=1 SV=3	652.402	701.836	898.796	544.048	920.506	989.588	1175.55	633.156
780	TRUE	Q99549|MPP8_HUMAN	2.42	4.07	2	2		M-phase phosphoprotein 8 OS=Homo sapiens OX=9606 GN=MPHOSPH8 PE=1 SV=2	2083.2	1963.96	99.3123	161.048	200.091	226.887	189.287	245.795
64	TRUE	P16615|AT2A2_HUMAN	7.57	34.45	35	35	Carbamidomethylation; Oxidation (M)	Sarcoplasmic/endoplasmic reticulum calcium ATPase 2 OS=Homo sapiens OX=9606 GN=ATP2A2 PE=1 SV=1	30791.4	32418.9	26277	27815.9	36040.4	34341.2	36066.4	38342.3
784	TRUE	P36897|TGFR1_HUMAN	2.88	11.53	4	4	Oxidation (M)	TGF-beta receptor type-1 OS=Homo sapiens OX=9606 GN=TGFBR1 PE=1 SV=1	3930.26	1765.07	1964.06	2004.61	2133.36	1654.35	1286.64	736.338
19	TRUE	Q14980|NUMA1_HUMAN	4.27	43.22	74	74	Carbamidomethylation; Oxidation (M)	Nuclear mitotic apparatus protein 1 OS=Homo sapiens OX=9606 GN=NUMA1 PE=1 SV=2	9973.67	9022.88	3250.24	3691.58	7770.04	4509.21	9706.17	12007.2
427	TRUE	P18564|ITB6_HUMAN	2.15	12.31	7	7	Oxidation (M)	Integrin beta-6 OS=Homo sapiens OX=9606 GN=ITGB6 PE=1 SV=2	30420.8	30696.9	32761.2	30101	22547.3	21328.4	21195.4	20839
325	TRUE	Q8IUD2|RB6I2_HUMAN	6.44	8.78	9	9	Oxidation (M)	ELKS/Rab6-interacting/CAST family member 1 OS=Homo sapiens OX=9606 GN=ERC1 PE=1 SV=1	3277.8	3561.63	4706.16	4759.23	6747.09	4484.41	5503.51	2482.53
456	TRUE	O95235|KI20A_HUMAN	22.03	11.12	8	8	Oxidation (M)	Kinesin-like protein KIF20A OS=Homo sapiens OX=9606 GN=KIF20A PE=1 SV=1	1329.7	1410.48	2212.81	2381.45	2988.54	4343.88	2318.7	1758.65
171	TRUE	Q32MZ4|LRRF1_HUMAN	1.65	34.41	19	19	Carbamidomethylation; Oxidation (M)	Leucine-rich repeat flightless-interacting protein 1 OS=Homo sapiens OX=9606 GN=LRRFIP1 PE=1 SV=2	13781.9	9426.01	8354.99	7484.09	5748.64	7299.15	8656.52	4612.45
446	TRUE	O60443|GSDME_HUMAN	1.59	22.98	10	10	Carbamidomethylation	Gasdermin-E OS=Homo sapiens OX=9606 GN=GSDME PE=1 SV=2	4407.15	4456.77	1550.46	2273.04	2608.77	1959.53	1152.59	1911.5
99	TRUE	Q9UIQ6|LCAP_HUMAN	14.31	33.95	25	25	Carbamidomethylation; Oxidation (M)	Leucyl-cystinyl aminopeptidase OS=Homo sapiens OX=9606 GN=LNPEP PE=1 SV=3	5428.14	4668.9	2954.21	2072.96	8492.96	7940.68	11901.7	11526.5
571	TRUE	Q12774|ARHG5_HUMAN	2.96	4.82	5	5	Oxidation (M)	Rho guanine nucleotide exchange factor 5 OS=Homo sapiens OX=9606 GN=ARHGEF5 PE=1 SV=3	564.228	508.518	239.447	149.37	479.32	354.564	330.752	340.748
301	TRUE	P42892|ECE1_HUMAN	1.98	23.25	12	12	Oxidation (M)	Endothelin-converting enzyme 1 OS=Homo sapiens OX=9606 GN=ECE1 PE=1 SV=2	2954.96	2685.53	1848.01	1679.87	1575.44	1378.98	3106.11	3617.04
291	TRUE	Q8N4S9|MALD2_HUMAN	10.04	21.86	11	11	Oxidation (M)	MARVEL domain-containing protein 2 OS=Homo sapiens OX=9606 GN=MARVELD2 PE=1 SV=2	6963.24	6488.64	6545.74	7105.4	8266.39	9005.11	8543.68	7967.97
1127	TRUE	Q9ULV8|CBLC_HUMAN	2.79	4.43	2	2		E3 ubiquitin-protein ligase CBL-C OS=Homo sapiens OX=9606 GN=CBLC PE=1 SV=3	792.097	594.853	217.999	130.765	275.518	120.673	202.987	118.257
515	TRUE	P23528|COF1_HUMAN	2.06	51.81	7	7	Acetylation (N-term); Carbamidomethylation	Cofilin-1 OS=Homo sapiens OX=9606 GN=CFL1 PE=1 SV=3	16553.9	18039.4	6179.22	6102.11	12824.8	11096	8728.06	10769.8
933	TRUE	Q8TB37|NUBPL_HUMAN	22.2	14.42	3	3		Iron-sulfur protein NUBPL OS=Homo sapiens OX=9606 GN=NUBPL PE=1 SV=3	265.883	205.299	544.858	542.011	338.403	543.177	529.049	574.858
797	TRUE	P17813|EGLN_HUMAN	1.3	9.57	5	5		Endoglin OS=Homo sapiens OX=9606 GN=ENG PE=1 SV=2	4204.56	4230.4	1541.83	1538.71	2031.35	1450.27	1128.77	2245
132	TRUE	Q9H5V8|CDCP1_HUMAN	4.05	29.9	23	23	Carbamidomethylation; Oxidation (M)	CUB domain-containing protein 1 OS=Homo sapiens OX=9606 GN=CDCP1 PE=1 SV=3	31723.7	32782.9	21383.5	21574.6	14076	17905.1	13320.4	15106.8
101	TRUE	O00571|DDX3X_HUMAN	0.36	50.15	29	29	Acetylation (N-term); Carbamidomethylation; Oxidation (M)	ATP-dependent RNA helicase DDX3X OS=Homo sapiens OX=9606 GN=DDX3X PE=1 SV=3	35176.3	35649.1	23110.9	21333	26615.4	26861.5	20049.9	19438.1
259	TRUE	P63244|RACK1_HUMAN	0.07	67.82	14	14	Carbamidomethylation; Oxidation (M)	Receptor of activated protein C kinase 1 OS=Homo sapiens OX=9606 GN=RACK1 PE=1 SV=3	38932.2	42265.2	37865.1	40586.6	31289.7	34652.1	33304.7	27525.6
126	TRUE	Q14C86|GAPD1_HUMAN	2.46	21.31	26	26	Oxidation (M)	GTPase-activating protein and VPS9 domain-containing protein 1 OS=Homo sapiens OX=9606 GN=GAPVD1 PE=1 SV=2	8549.62	8810.88	4575.77	4029.38	7850.79	6787.18	5543.24	5355.38
264	TRUE	Q9Y5Y6|ST14_HUMAN	17.5	21.4	15	15	Carbamidomethylation	Suppressor of tumorigenicity 14 protein OS=Homo sapiens OX=9606 GN=ST14 PE=1 SV=2	14199.2	14309.9	18083.2	16830.7	20321	23125.5	27719.6	24575.6
111	TRUE	Q8TDM6|DLG5_HUMAN	10.27	19.49	29	29	Oxidation (M)	Disks large homolog 5 OS=Homo sapiens OX=9606 GN=DLG5 PE=1 SV=4	2290.38	3652.34	874.293	1165	4675.69	4253.72	3838.23	3515.12
1028	TRUE	P49768|PSN1_HUMAN	0.44	8.57	3	3	Oxidation (M)	Presenilin-1 OS=Homo sapiens OX=9606 GN=PSEN1 PE=1 SV=1	543.988	438.649	0	0	915.142	746.897	500.254	261.011
468	TRUE	Q99816|TS101_HUMAN	12.69	22.31	7	7	Oxidation (M)	Tumor susceptibility gene 101 protein OS=Homo sapiens OX=9606 GN=TSG101 PE=1 SV=2	506.358	490.03	1105.39	1820.44	604.663	4391.85	1409.1	1741.98
131	TRUE	Q9UJS0|CMC2_HUMAN	7.41	48.15	25	25	Carbamidomethylation; Oxidation (M)	Calcium-binding mitochondrial carrier protein Aralar2 OS=Homo sapiens OX=9606 GN=SLC25A13 PE=1 SV=2	9151.29	8668.99	6115.73	6437.01	11212.5	8153.93	11857.5	10174.2
744	TRUE	Q6IQ49|SDE2_HUMAN	7.91	15.74	5	5	Oxidation (M)	Replication stress response regulator SDE2 OS=Homo sapiens OX=9606 GN=SDE2 PE=1 SV=1	796.584	704.091	143.117	60.8232	1012.42	600.468	820.564	999.132
1096	TRUE	Q6UXD5|SE6L2_HUMAN	7.05	4.07	2	2	Oxidation (M)	Seizure 6-like protein 2 OS=Homo sapiens OX=9606 GN=SEZ6L2 PE=1 SV=2	360.292	400.271	662.251	716.123	409.415	388.186	1183.14	1139.97
949	TRUE	Q86WJ1|CHD1L_HUMAN	27.37	2.56	2	2		Chromodomain-helicase-DNA-binding protein 1-like OS=Homo sapiens OX=9606 GN=CHD1L PE=1 SV=3	1216.91	1250.01	1965.35	2280.61	290.7	611.94	679.061	297.496
693	TRUE	P09497|CLCB_HUMAN	8.08	13.1	3	3		Clathrin light chain B OS=Homo sapiens OX=9606 GN=CLTB PE=1 SV=1	412.565	568.31	562.312	666.659	588.372	530.806	631.285	763.945
61	TRUE	P0DMV8|HS71A_HUMAN	4.82	27.3	30	14	Acetylation (N-term); Carbamidomethylation; Oxidation (M)	Heat shock 70 kDa protein 1A OS=Homo sapiens OX=9606 GN=HSPA1A PE=1 SV=1	26672.1	27549.8	13077.5	13146.7	31733.8	28938.1	18208.4	20494.3
507	TRUE	O60645|EXOC3_HUMAN	2.65	15.44	8	8		Exocyst complex component 3 OS=Homo sapiens OX=9606 GN=EXOC3 PE=1 SV=3	1336.64	1539.96	876.274	673.675	1330.73	644.841	1332.75	1463.89
354	TRUE	P51148|RAB5C_HUMAN	3.3	44.44	9	6	Oxidation (M)	Ras-related protein Rab-5C OS=Homo sapiens OX=9606 GN=RAB5C PE=1 SV=2	11054.2	11166.4	5746.15	4388	9463.29	6870.81	8433.95	9996.85
1107	TRUE	O95197|RTN3_HUMAN	4.56	2.23	2	2		Reticulon-3 OS=Homo sapiens OX=9606 GN=RTN3 PE=1 SV=2	8229.31	8749.44	2422.96	2642.68	7077.37	5833.46	6871.97	6962.14
69	TRUE	P26006|ITA3_HUMAN	2.17	29.21	30	30	Carbamidomethylation; Oxidation (M)	Integrin alpha-3 OS=Homo sapiens OX=9606 GN=ITGA3 PE=1 SV=5	74253.8	75611.1	68977.6	70370.8	68681.8	66589.2	65181.3	62477.4
575	TRUE	P27448|MARK3_HUMAN	0.84	9.03	7	5		MAP/microtubule affinity-regulating kinase 3 OS=Homo sapiens OX=9606 GN=MARK3 PE=1 SV=5	691.855	578.18	254.654	236.909	436.143	273.226	145.896	315.843
534	TRUE	P06213|INSR_HUMAN	5.93	1.59	6	2		Insulin receptor OS=Homo sapiens OX=9606 GN=INSR PE=1 SV=4	49676.4	837.129	19782	19990.6	22277.1	28309.2	27547.5	25328
886	TRUE	Q9P0K1|ADA22_HUMAN	4.42	4.86	3	3	Oxidation (M)	Disintegrin and metalloproteinase domain-containing protein 22 OS=Homo sapiens OX=9606 GN=ADAM22 PE=1 SV=1	391.301	128.35	135.306	137.912	109.545	257.606	346.755	266.795
919	TRUE	Q15165|PON2_HUMAN	1.39	15.54	3	3		Serum paraoxonase/arylesterase 2 OS=Homo sapiens OX=9606 GN=PON2 PE=1 SV=4	655.049	755.21	0	133.589	387.026	189.054	372.821	215.301
20	TRUE	P35908|K22E_HUMAN	12.24	62.44	59	40	Oxidation (M)	Keratin, type II cytoskeletal 2 epidermal OS=Homo sapiens OX=9606 GN=KRT2 PE=1 SV=2	99939.5	100789	80795.2	81003	126193	125263	200836	205039
634	TRUE	P07947|YES_HUMAN	2.89	15.47	7	5	Oxidation (M)	Tyrosine-protein kinase Yes OS=Homo sapiens OX=9606 GN=YES1 PE=1 SV=3	2840.32	2324.75	839.027	546.869	1629.89	1150.82	1820.57	2107.84
1086	TRUE	Q9H9K5|MER34_HUMAN	0.45	4.44	2	2		Endogenous retroviral envelope protein HEMO OS=Homo sapiens OX=9606 GN=ERVMER34-1 PE=1 SV=1	2077.49	1976.08	858.73	966.02	1174.87	1414.49	691.256	890.654
263	TRUE	Q9NV70|EXOC1_HUMAN	7.11	18.46	12	12	Oxidation (M)	Exocyst complex component 1 OS=Homo sapiens OX=9606 GN=EXOC1 PE=1 SV=4	1971.25	1918.82	739.319	762.613	2474.4	1653.95	2205.65	2012.45
719	TRUE	P06703|S10A6_HUMAN	8.32	28.89	2	2	Acetylation (N-term); Carbamidomethylation; Oxidation (M)	Protein S100-A6 OS=Homo sapiens OX=9606 GN=S100A6 PE=1 SV=1	16203.8	16000.6	5489.57	5674.73	22956.4	13290.5	21825.3	21427.8
934	TRUE	O15498|YKT6_HUMAN	1.05	22.22	3	3	Oxidation (M)	Synaptobrevin homolog YKT6 OS=Homo sapiens OX=9606 GN=YKT6 PE=1 SV=1	899.737	646.852	221.481	172.757	406.548	222.562	205.518	217.516
218	TRUE	Q99569|PKP4_HUMAN	7.48	14.93	14	14		Plakophilin-4 OS=Homo sapiens OX=9606 GN=PKP4 PE=1 SV=2	1663.25	1432.97	5782.62	3305.61	1843.49	1490.39	1567.81	1411.25
364	TRUE	Q9H7D0|DOCK5_HUMAN	6.6	5.29	8	8	Carbamidomethylation	Dedicator of cytokinesis protein 5 OS=Homo sapiens OX=9606 GN=DOCK5 PE=1 SV=3	1217.62	1063.29	3800.23	3744.14	1352.36	2362.06	817.516	316.793
892	TRUE	Q92896|GSLG1_HUMAN	8.76	3.73	4	4	Oxidation (M)	Golgi apparatus protein 1 OS=Homo sapiens OX=9606 GN=GLG1 PE=1 SV=2	1117.49	1000.39	867.586	693.879	2509.31	1247.53	912.732	1601.88
583	TRUE	Q9NZW5|MPP6_HUMAN	0.65	20.37	8	8		MAGUK p55 subfamily member 6 OS=Homo sapiens OX=9606 GN=MPP6 PE=1 SV=2	1782.7	1836.87	523.027	644.548	1218	351.523	862.205	717.978
194	TRUE	Q9NXE4|NSMA3_HUMAN	7.57	21.13	15	15	Acetylation (N-term); Carbamidomethylation; Oxidation (M)	Sphingomyelin phosphodiesterase 4 OS=Homo sapiens OX=9606 GN=SMPD4 PE=1 SV=3	4521.69	21477.6	7774.65	7889.68	21209.2	10276.8	13494.4	15641.1
939	TRUE	Q10589|BST2_HUMAN	32.04	18.33	3	3		Bone marrow stromal antigen 2 OS=Homo sapiens OX=9606 GN=BST2 PE=1 SV=1	1517.52	1827.98	647.249	1373.09	22212.7	17198	16250.9	15685.9
323	TRUE	Q9BQ39|DDX50_HUMAN	1.88	20.35	11	11	Oxidation (M)	ATP-dependent RNA helicase DDX50 OS=Homo sapiens OX=9606 GN=DDX50 PE=1 SV=1	13753.4	11926.7	5378.11	5297.01	4529.32	4369.1	6346.6	5434.48
79	TRUE	Q07157|ZO1_HUMAN	3.06	26.09	31	31	Oxidation (M)	Tight junction protein ZO-1 OS=Homo sapiens OX=9606 GN=TJP1 PE=1 SV=3	4323.17	4639.35	1758.08	2615.41	3076.52	2627.02	4180.45	4363.41
484	TRUE	O15530|PDPK1_HUMAN	8.9	18.88	8	8		3-phosphoinositide-dependent protein kinase 1 OS=Homo sapiens OX=9606 GN=PDPK1 PE=1 SV=1	777.18	1081.77	1117.3	1175.53	1328.94	847.677	1954.7	1683.31
113	TRUE	Q9P273|TEN3_HUMAN	10.8	16.9	30	29	Carbamidomethylation; Oxidation (M)	Teneurin-3 OS=Homo sapiens OX=9606 GN=TENM3 PE=1 SV=3	6508.53	6859.87	3534.37	3566.11	2001.52	1733.18	997.137	1558.76
675	TRUE	Q96JI7|SPTCS_HUMAN	3.91	3.4	6	6		Spatacsin OS=Homo sapiens OX=9606 GN=SPG11 PE=1 SV=3	614.885	575.574	2494.77	457.624	376.223	1071.13	403.31	190.824
464	TRUE	Q05682|CALD1_HUMAN	6.91	13.11	9	9		Caldesmon OS=Homo sapiens OX=9606 GN=CALD1 PE=1 SV=3	1603.7	2196.47	618.921	629.108	457.979	462.866	308.696	327.661
239	TRUE	Q16625|OCLN_HUMAN	6.51	35.82	16	16	Oxidation (M)	Occludin OS=Homo sapiens OX=9606 GN=OCLN PE=1 SV=1	13484	13350.9	12391.7	12711.5	14697.3	14536.5	16376	13136.3
686	TRUE	P23469|PTPRE_HUMAN	5.65	8.14	5	5		Receptor-type tyrosine-protein phosphatase epsilon OS=Homo sapiens OX=9606 GN=PTPRE PE=1 SV=1	695.68	696.195	254.408	288.085	812.136	369.773	775.996	983.828
310	TRUE	O60488|ACSL4_HUMAN	5.03	13.5	10	7	Oxidation (M)	Long-chain-fatty-acid--CoA ligase 4 OS=Homo sapiens OX=9606 GN=ACSL4 PE=1 SV=2	2741.26	2747.58	1317.23	602.101	869.373	823.813	435.324	528.952
676	TRUE	O95716|RAB3D_HUMAN	18.04	22.83	4	3	Oxidation (M)	Ras-related protein Rab-3D OS=Homo sapiens OX=9606 GN=RAB3D PE=1 SV=1	2012.84	1812.57	2461.91	3374.67	2892.68	3130.45	4057.3	4229.35
451	TRUE	Q07864|DPOE1_HUMAN	21.86	4.55	9	9	Acetylation (N-term); Oxidation (M)	DNA polymerase epsilon catalytic subunit A OS=Homo sapiens OX=9606 GN=POLE PE=1 SV=5	3530.58	3022.16	12181.3	10362.6	8028.27	9997.21	7624.71	7865.74
65	TRUE	Q9UMD9|COHA1_HUMAN	15.69	21.38	34	34	Carbamidomethylation; Oxidation (M)	Collagen alpha-1(XVII) chain OS=Homo sapiens OX=9606 GN=COL17A1 PE=1 SV=3	57789.4	51601.7	51415.6	42814.9	107680	104756	80366.8	82615.2
504	TRUE	Q5VZK9|CARL1_HUMAN	13.16	6.93	6	6		F-actin-uncapping protein LRRC16A OS=Homo sapiens OX=9606 GN=CARMIL1 PE=1 SV=1	190.978	335.245	126.957	132.716	396.022	632.87	414.489	324.963
72	TRUE	P11021|BIP_HUMAN	1.92	47.4	36	32	Oxidation (M)	Endoplasmic reticulum chaperone BiP OS=Homo sapiens OX=9606 GN=HSPA5 PE=1 SV=2	43680.7	44571.1	44557	41987.6	40492.5	39841.6	37740.1	37475.3
880	TRUE	Q9HBI1|PARVB_HUMAN	2.01	10.99	4	3		Beta-parvin OS=Homo sapiens OX=9606 GN=PARVB PE=1 SV=1	844.105	775.806	105.105	225.012	208.254	78.4789	237.136	294.358
439	TRUE	P11274|BCR_HUMAN	0.65	7	9	8	Oxidation (M)	Breakpoint cluster region protein OS=Homo sapiens OX=9606 GN=BCR PE=1 SV=2	1536.96	1385.56	796.26	803.185	896.916	920	1019.57	845.25
565	TRUE	Q9Y4F1|FARP1_HUMAN	15.41	4.5	4	4		FERM, ARHGEF and pleckstrin domain-containing protein 1 OS=Homo sapiens OX=9606 GN=FARP1 PE=1 SV=1	1590.1	1827.59	1134.31	1220.07	4365.39	2824.21	2979.97	3041
1071	TRUE	P14384|CBPM_HUMAN	16.6	6.55	2	2		Carboxypeptidase M OS=Homo sapiens OX=9606 GN=CPM PE=1 SV=2	297.899	104.507	326.187	246.533	866.26	581.966	385.999	300.024
353	TRUE	P18206|VINC_HUMAN	11.87	8.02	6	6	Oxidation (M)	Vinculin OS=Homo sapiens OX=9606 GN=VCL PE=1 SV=4	207.398	332.515	276.332	332.077	393.967	298.996	694.607	583.177
1230	TRUE	Q96F46|I17RA_HUMAN	4.03	2.66	2	2		Interleukin-17 receptor A OS=Homo sapiens OX=9606 GN=IL17RA PE=1 SV=2	271.004	176.253	135.176	104.697	317.01	107.631	230.413	219.558
5	TRUE	P04264|K2C1_HUMAN	4.75	59.63	58	47	Acetylation (N-term); Carbamidomethylation; Oxidation (M)	Keratin, type II cytoskeletal 1 OS=Homo sapiens OX=9606 GN=KRT1 PE=1 SV=6	176155	173292	318917	314459	174105	179075	304397	304222
846	TRUE	Q9Y5X3|SNX5_HUMAN	0.84	14.36	5	5	Acetylation (N-term); Oxidation (M)	Sorting nexin-5 OS=Homo sapiens OX=9606 GN=SNX5 PE=1 SV=1	662.357	754.14	959.121	912.268	698.65	501.138	585.243	673.552
388	TRUE	P52735|VAV2_HUMAN	1.36	12.3	9	9		Guanine nucleotide exchange factor VAV2 OS=Homo sapiens OX=9606 GN=VAV2 PE=1 SV=2	2804.4	2948.13	844.435	1089.66	1533.88	1965.49	1807.81	1196.83
107	TRUE	O15294|OGT1_HUMAN	0.93	27.72	25	25	Acetylation (N-term); Oxidation (M)	UDP-N-acetylglucosamine--peptide N-acetylglucosaminyltransferase 110 kDa subunit OS=Homo sapiens OX=9606 GN=OGT PE=1 SV=3	9179.58	9225.74	2767.82	1956.8	5493.71	3422.78	3968.45	4610.54
1191	TRUE	O75935|DCTN3_HUMAN	2.23	10.75	2	2		Dynactin subunit 3 OS=Homo sapiens OX=9606 GN=DCTN3 PE=1 SV=1	277.502	148.249	166.102	467.905	144.96	264.08	71.0215	194.018
424	TRUE	O75955|FLOT1_HUMAN	5.25	26.93	9	9	Oxidation (M)	Flotillin-1 OS=Homo sapiens OX=9606 GN=FLOT1 PE=1 SV=3	365.867	706.038	3528.34	3392.5	1801.01	3933.93	871.123	1399.1
532	TRUE	P54278|PMS2_HUMAN	0.75	11.48	6	6	Oxidation (M)	Mismatch repair endonuclease PMS2 OS=Homo sapiens OX=9606 GN=PMS2 PE=1 SV=2	1128.28	1218.88	632.247	642.172	814.175	633.625	714.056	836.045
1261	TRUE	Q96B97|SH3K1_HUMAN	22.36	3.61	2	2		SH3 domain-containing kinase-binding protein 1 OS=Homo sapiens OX=9606 GN=SH3KBP1 PE=1 SV=2	555.994	472.031	4683.98	423.797	4820.07	7909.12	6140.37	3855.77
691	TRUE	O00400|ACATN_HUMAN	2.52	6.74	3	3		Acetyl-coenzyme A transporter 1 OS=Homo sapiens OX=9606 GN=SLC33A1 PE=1 SV=1	2098.31	2010.46	684.999	713.476	425.459	869.824	840.87	643.73
11	TRUE	Q01082|SPTB2_HUMAN	7.89	44.84	88	80	Acetylation (N-term); Carbamidomethylation; Oxidation (M)	Spectrin beta chain, non-erythrocytic 1 OS=Homo sapiens OX=9606 GN=SPTBN1 PE=1 SV=2	12579.9	12822.5	11695.7	12403.5	6213.74	2586.66	6897.58	6585.03
622	TRUE	Q96CW1|AP2M1_HUMAN	3.88	13.79	5	5	Oxidation (M)	AP-2 complex subunit mu OS=Homo sapiens OX=9606 GN=AP2M1 PE=1 SV=2	3774.76	4076.02	568.096	1155.28	2505.52	1871.36	3430.02	3241.51
227	TRUE	P50281|MMP14_HUMAN	0.9	24.23	14	14	Carbamidomethylation; Oxidation (M)	Matrix metalloproteinase-14 OS=Homo sapiens OX=9606 GN=MMP14 PE=1 SV=3	15397	14760.5	9748.8	10200.8	11237.3	11515.1	7612.86	6110.59
487	TRUE	Q04721|NOTC2_HUMAN	1.53	3.32	8	6	Oxidation (M)	Neurogenic locus notch homolog protein 2 OS=Homo sapiens OX=9606 GN=NOTCH2 PE=1 SV=3	1171.2	921.168	264.355	256.308	728.894	813.119	235.895	608.096
526	TRUE	Q96EY1|DNJA3_HUMAN	4.14	26.67	9	9	Oxidation (M)	DnaJ homolog subfamily A member 3, mitochondrial OS=Homo sapiens OX=9606 GN=DNAJA3 PE=1 SV=2	1645.21	2106.17	1434.29	2013.26	2167.21	1739.35	1632.38	1906.12
862	TRUE	Q16512|PKN1_HUMAN	3.35	4.25	4	3	Oxidation (M)	Serine/threonine-protein kinase N1 OS=Homo sapiens OX=9606 GN=PKN1 PE=1 SV=2	505.789	429.948	619.526	402.739	370.705	248.954	255.238	358.295
537	TRUE	P48730|KC1D_HUMAN	1.91	18.55	7	7	Oxidation (M)	Casein kinase I isoform delta OS=Homo sapiens OX=9606 GN=CSNK1D PE=1 SV=2	2967.63	3197.2	6352.26	5939.47	3231.53	8040.1	2825.67	2706.45
112	TRUE	Q13332|PTPRS_HUMAN	21.01	12.83	27	15	Oxidation (M)	Receptor-type tyrosine-protein phosphatase S OS=Homo sapiens OX=9606 GN=PTPRS PE=1 SV=3	857.62	762.995	1975.71	1780.43	3684.17	1705.66	4318.36	5484.8
767	TRUE	O60941|DTNB_HUMAN	1.02	11.96	5	5	Oxidation (M)	Dystrobrevin beta OS=Homo sapiens OX=9606 GN=DTNB PE=1 SV=1	1320.65	1479.79	3304.11	447.891	1032.96	758.893	976.409	829.036
825	TRUE	Q96NW4|ANR27_HUMAN	3.08	3.52	3	3		Ankyrin repeat domain-containing protein 27 OS=Homo sapiens OX=9606 GN=ANKRD27 PE=1 SV=2	433.984	527.061	685.287	575.402	2310.92	1925.1	174.177	297.014
829	TRUE	P51636|CAV2_HUMAN	9.05	37.65	4	4	Oxidation (M)	Caveolin-2 OS=Homo sapiens OX=9606 GN=CAV2 PE=1 SV=2	5520.08	5162.4	2336.74	4521.85	6816.68	6424.32	6862.63	7287.89
838	TRUE	P25054|APC_HUMAN	2.24	1.13	2	2		Adenomatous polyposis coli protein OS=Homo sapiens OX=9606 GN=APC PE=1 SV=2	617.022	664.613	220.751	200.512	408.593	103.067	157.918	241.261
44	TRUE	P12814|ACTN1_HUMAN	5.6	45.52	44	34	Carbamidomethylation; Oxidation (M)	Alpha-actinin-1 OS=Homo sapiens OX=9606 GN=ACTN1 PE=1 SV=2	38900.4	39161.4	34605.9	34527.2	20406	24321.2	19277.9	20126.5
313	TRUE	Q13492|PICAL_HUMAN	1.84	26.84	13	13	Oxidation (M)	Phosphatidylinositol-binding clathrin assembly protein OS=Homo sapiens OX=9606 GN=PICALM PE=1 SV=2	6003.41	6445.58	1596.58	1748.98	3395.64	1557.29	6183.74	4885.38
950	TRUE	Q9Y2J4|AMOL2_HUMAN	4.29	3.34	2	2		Angiomotin-like protein 2 OS=Homo sapiens OX=9606 GN=AMOTL2 PE=1 SV=3	56.1137	65.4512	0	0	136.587	67.973	89.3132	220.082
230	TRUE	P30153|2AAA_HUMAN	2.22	33.96	15	15	Oxidation (M)	Serine/threonine-protein phosphatase 2A 65 kDa regulatory subunit A alpha isoform OS=Homo sapiens OX=9606 GN=PPP2R1A PE=1 SV=4	8897.69	8534.67	2439.16	5990.46	7271.65	5042.74	6578.22	5674.93
406	TRUE	P61204|ARF3_HUMAN	24.55	31.49	7	4	Oxidation (M)	ADP-ribosylation factor 3 OS=Homo sapiens OX=9606 GN=ARF3 PE=1 SV=2	15371.5	12063.9	25169.8	24298.1	27764.8	24568.9	26124.2	27078.9
881	TRUE	O95810|CAVN2_HUMAN	21.26	7.29	2	2	Oxidation (M)	Caveolae-associated protein 2 OS=Homo sapiens OX=9606 GN=CAVIN2 PE=1 SV=3	650.375	696.54	820.78	825.154	2123.48	1223.05	2549.14	3234.37
257	TRUE	P23470|PTPRG_HUMAN	22.86	14.46	15	15		Receptor-type tyrosine-protein phosphatase gamma OS=Homo sapiens OX=9606 GN=PTPRG PE=1 SV=4	5069.25	5219.28	3575.4	3664.08	693.792	149.216	441.843	406.728
125	TRUE	P50851|LRBA_HUMAN	3.25	10.58	24	24	Carbamidomethylation; Oxidation (M)	Lipopolysaccharide-responsive and beige-like anchor protein OS=Homo sapiens OX=9606 GN=LRBA PE=1 SV=4	1894.75	1855.33	3290.89	3218.01	2717.53	1554.01	1768.72	5884.33
166	TRUE	P54760|EPHB4_HUMAN	0.05	17.33	19	13	Oxidation (M)	Ephrin type-B receptor 4 OS=Homo sapiens OX=9606 GN=EPHB4 PE=1 SV=2	4415.32	4066.06	2203.99	2722.75	2744.56	1942.71	2533.61	2996.04
893	TRUE	Q9BRQ8|FSP1_HUMAN	12.23	13.94	4	4		Ferroptosis suppressor protein 1 OS=Homo sapiens OX=9606 GN=AIFM2 PE=1 SV=1	448.066	503.158	447.626	393.577	980.212	622.914	584.109	913.161
252	TRUE	P55290|CAD13_HUMAN	31.8	26.09	12	12	Oxidation (M)	Cadherin-13 OS=Homo sapiens OX=9606 GN=CDH13 PE=1 SV=1	27558.3	27142.1	14769.5	9685.58	219.993	150.385	427.049	564.293
440	TRUE	P51149|RAB7A_HUMAN	10.27	60.39	10	10	Oxidation (M)	Ras-related protein Rab-7a OS=Homo sapiens OX=9606 GN=RAB7A PE=1 SV=1	6861.78	6627.67	6574.78	6453.9	7465.16	8477.59	9476.26	10462.1
731	TRUE	Q9UBT7|CTNL1_HUMAN	0.12	6.13	3	3	Acetylation (N-term)	Alpha-catulin OS=Homo sapiens OX=9606 GN=CTNNAL1 PE=1 SV=2	17008.2	11290.6	10759.8	11164	14873.2	23007.3	7288.38	3814.16
1259	TRUE	Q8N1I0|DOCK4_HUMAN	14.79	1.37	2	2		Dedicator of cytokinesis protein 4 OS=Homo sapiens OX=9606 GN=DOCK4 PE=1 SV=3	170.172	303.233	0	0	42.601	0	0	26.2023
71	TRUE	Q9NZB2|F120A_HUMAN	0.31	41.14	33	33	Carbamidomethylation; Oxidation (M)	Constitutive coactivator of PPAR-gamma-like protein 1 OS=Homo sapiens OX=9606 GN=FAM120A PE=1 SV=2	20857.9	21170.1	10947.4	9877.11	12214.7	9904.47	10634.7	12126.8
244	TRUE	Q12959|DLG1_HUMAN	5.12	25.22	16	16	Carbamidomethylation	Disks large homolog 1 OS=Homo sapiens OX=9606 GN=DLG1 PE=1 SV=2	2065.99	1296.3	698.866	711.931	1578.06	1106.58	1476.38	2062.58
148	TRUE	P16070|CD44_HUMAN	4.37	19	21	21	Carbamidomethylation; Oxidation (M)	CD44 antigen OS=Homo sapiens OX=9606 GN=CD44 PE=1 SV=3	410430	409065	391801	403722	294235	329700	204948	183768
885	TRUE	Q9NXR1|NDE1_HUMAN	9.92	12.24	3	3		Nuclear distribution protein nudE homolog 1 OS=Homo sapiens OX=9606 GN=NDE1 PE=1 SV=3	178.444	198.678	213.341	100.894	428.711	247.798	182.753	382.115
28	TRUE	Q14517|FAT1_HUMAN	0.7	17.22	59	59	Oxidation (M)	Protocadherin Fat 1 OS=Homo sapiens OX=9606 GN=FAT1 PE=1 SV=2	6806.15	6215.25	2196.98	1886.94	2720.49	6081.5	2361.1	2741.81
411	TRUE	O75326|SEM7A_HUMAN	6.75	17.72	7	7	Oxidation (M)	Semaphorin-7A OS=Homo sapiens OX=9606 GN=SEMA7A PE=1 SV=1	10388.4	10445.5	723.678	2073.58	487.619	2274.97	691.162	464.445
480	TRUE	Q9H6S3|ES8L2_HUMAN	22.26	21.68	9	9	Oxidation (M)	Epidermal growth factor receptor kinase substrate 8-like protein 2 OS=Homo sapiens OX=9606 GN=EPS8L2 PE=1 SV=2	753.299	942.412	673.959	1082.57	2275.91	2148.75	1719.75	2072.07
360	TRUE	Q86X29|LSR_HUMAN	7.67	25.58	11	11	Oxidation (M)	Lipolysis-stimulated lipoprotein receptor OS=Homo sapiens OX=9606 GN=LSR PE=1 SV=4	7114.71	7500.99	3406.23	3891.91	9314.16	7521.87	7702.51	8229.62
956	TRUE	O14939|PLD2_HUMAN	0.74	5.04	3	3		Phospholipase D2 OS=Homo sapiens OX=9606 GN=PLD2 PE=1 SV=2	673.225	871.742	267.821	268.179	399.59	344.62	355.938	525.877
382	TRUE	P19022|CADH2_HUMAN	14.37	16.67	12	11	Oxidation (M)	Cadherin-2 OS=Homo sapiens OX=9606 GN=CDH2 PE=1 SV=4	2629.61	2453.02	1578.65	1633.64	171.992	1711.96	149.146	169.56
936	TRUE	O60669|MOT2_HUMAN	6.99	6.69	4	4		Monocarboxylate transporter 2 OS=Homo sapiens OX=9606 GN=SLC16A7 PE=1 SV=2	4172.23	4285.6	4671.91	4424.67	4765.59	3708.78	6327.06	7184.53
765	TRUE	Q96SB3|NEB2_HUMAN	1.76	6.73	4	4		Neurabin-2 OS=Homo sapiens OX=9606 GN=PPP1R9B PE=1 SV=3	450.372	454.641	78.7882	0	438.864	445.776	210.786	251.13
172	TRUE	P54753|EPHB3_HUMAN	37.75	20.34	21	13	Oxidation (M)	Ephrin type-B receptor 3 OS=Homo sapiens OX=9606 GN=EPHB3 PE=1 SV=2	1190.64	1411.88	1732.3	1507.17	7683.65	6344.31	8433.94	9517.02
1260	TRUE	O75712|CXB3_HUMAN	8.8	9.63	2	2		Gap junction beta-3 protein OS=Homo sapiens OX=9606 GN=GJB3 PE=1 SV=1	1348.66	1464.48	271.289	537.416	2332.82	1914.84	1253.77	1741
280	TRUE	Q9NZU0|FLRT3_HUMAN	8.88	30.2	14	14	Oxidation (M)	Leucine-rich repeat transmembrane protein FLRT3 OS=Homo sapiens OX=9606 GN=FLRT3 PE=1 SV=1	8684.02	8090.25	3406.43	3390.57	2517.88	1792.3	1230.81	1440.14
735	TRUE	Q7L5N7|PCAT2_HUMAN	0.31	11.58	5	5		Lysophosphatidylcholine acyltransferase 2 OS=Homo sapiens OX=9606 GN=LPCAT2 PE=1 SV=1	2608.56	2549.44	647.334	893.308	1296.23	653.94	1102.87	1264.78
266	TRUE	Q15582|BGH3_HUMAN	13.11	31.63	15	15	Oxidation (M)	Transforming growth factor-beta-induced protein ig-h3 OS=Homo sapiens OX=9606 GN=TGFBI PE=1 SV=1	3545.99	3451.86	2003.71	2841.31	6025.91	4302.18	7379.76	7415.12
168	TRUE	P21589|5NTD_HUMAN	20.2	40.07	20	20	Oxidation (M)	5'-nucleotidase OS=Homo sapiens OX=9606 GN=NT5E PE=1 SV=1	30148.1	28823.2	17680.2	14349	4002.46	2777.32	3452.99	3203.9
1207	TRUE	Q13488|VPP3_HUMAN	3.86	3.25	2	2		V-type proton ATPase 116 kDa subunit a3 OS=Homo sapiens OX=9606 GN=TCIRG1 PE=1 SV=3	373.588	443.038	50.3805	201.464	358.378	259.395	285.695	297.831
430	TRUE	Q6ZNJ1|NBEL2_HUMAN	11.89	4.5	8	8	Carbamidomethylation; Oxidation (M)	Neurobeachin-like protein 2 OS=Homo sapiens OX=9606 GN=NBEAL2 PE=1 SV=2	1207.91	1199.49	649.681	0	464.256	66.4004	182.436	178.928
621	TRUE	Q9BR76|COR1B_HUMAN	3.32	19.63	7	7	Carbamidomethylation; Oxidation (M)	Coronin-1B OS=Homo sapiens OX=9606 GN=CORO1B PE=1 SV=1	1050.41	1314.12	584.235	1180.85	2390.8	1205.22	849.208	640.71
25	TRUE	P08195|4F2_HUMAN	14.11	60.32	77	77	Carbamidomethylation; Oxidation (M)	4F2 cell-surface antigen heavy chain OS=Homo sapiens OX=9606 GN=SLC3A2 PE=1 SV=3	231230	249668	277143	275852	324422	327849	460225	433777
37	TRUE	P08727|K1C19_HUMAN	27.66	81	45	43	Oxidation (M)	Keratin, type I cytoskeletal 19 OS=Homo sapiens OX=9606 GN=KRT19 PE=1 SV=4	75446.2	73185.4	77883.2	79338.9	186122	210826	255588	205620
897	TRUE	Q9H0U3|MAGT1_HUMAN	28.78	13.13	4	4	Oxidation (M)	Magnesium transporter protein 1 OS=Homo sapiens OX=9606 GN=MAGT1 PE=1 SV=1	2021.27	1810.35	4260.02	3704.32	1062.99	1394.29	1237.12	1461.4
191	TRUE	O00443|P3C2A_HUMAN	2.65	12.04	17	17		Phosphatidylinositol 4-phosphate 3-kinase C2 domain-containing subunit alpha OS=Homo sapiens OX=9606 GN=PIK3C2A PE=1 SV=2	1486.06	1792.41	1352.36	2261.74	886.678	2844.71	733.142	682.883
594	TRUE	P18615|NELFE_HUMAN	6.21	17.37	5	5		Negative elongation factor E OS=Homo sapiens OX=9606 GN=NELFE PE=1 SV=3	597.466	491.774	395.753	287.252	489.709	1048.17	519.961	392.386
747	TRUE	P62070|RRAS2_HUMAN	4.37	18.63	4	3	Oxidation (M)	Ras-related protein R-Ras2 OS=Homo sapiens OX=9606 GN=RRAS2 PE=1 SV=1	2593.44	2661.27	2673.09	2353.15	1846.93	2584.22	528.318	1388.3
940	TRUE	Q16222|UAP1_HUMAN	2.4	7.47	3	3		UDP-N-acetylhexosamine pyrophosphorylase OS=Homo sapiens OX=9606 GN=UAP1 PE=1 SV=3	608.725	678.375	249.774	254.194	378.97	226.701	158.698	203.935
704	TRUE	P29353|SHC1_HUMAN	0.81	15.27	5	5	Oxidation (M)	SHC-transforming protein 1 OS=Homo sapiens OX=9606 GN=SHC1 PE=1 SV=4	585.613	703.251	1229.5	1940.66	946.845	1129.47	732.478	399.801
142	TRUE	P07237|PDIA1_HUMAN	5.05	43.7	21	21	Oxidation (M)	Protein disulfide-isomerase OS=Homo sapiens OX=9606 GN=P4HB PE=1 SV=3	12659.6	11753.2	9037.25	9868.01	14461.1	12089.3	9745.86	12932.5
175	TRUE	P52789|HXK2_HUMAN	4.09	23.88	17	17	Acetylation (N-term); Oxidation (M)	Hexokinase-2 OS=Homo sapiens OX=9606 GN=HK2 PE=1 SV=2	4657.7	4847.05	1746.14	1900.32	7416.55	3205.95	2896.7	3463.21
701	TRUE	Q9P289|STK26_HUMAN	5.93	18.27	6	6		Serine/threonine-protein kinase 26 OS=Homo sapiens OX=9606 GN=STK26 PE=1 SV=2	1937.03	2436.82	1302.83	2353.8	2325.93	2603.82	2247.22	2093.83
916	TRUE	Q9HCL2|GPAT1_HUMAN	10.12	4.71	3	3	Carbamidomethylation	Glycerol-3-phosphate acyltransferase 1, mitochondrial OS=Homo sapiens OX=9606 GN=GPAM PE=1 SV=3	2477.51	1878.21	6703.41	6049.17	5049.22	8760.6	3254.89	2829.38
193	TRUE	Q14571|ITPR2_HUMAN	1.58	3.78	13	8	Oxidation (M)	Inositol 1,4,5-trisphosphate receptor type 2 OS=Homo sapiens OX=9606 GN=ITPR2 PE=1 SV=2	5707.62	3585.14	3687.91	3353.45	2941.23	4307.49	2345.5	1875.15
180	TRUE	P35052|GPC1_HUMAN	11.9	39.96	19	19	Carbamidomethylation; Oxidation (M)	Glypican-1 OS=Homo sapiens OX=9606 GN=GPC1 PE=1 SV=2	10013.7	10837.5	7598.08	6610.59	15026.2	14003.3	15326.3	17312.4
858	TRUE	P50552|VASP_HUMAN	1.91	12.89	4	4	Oxidation (M)	Vasodilator-stimulated phosphoprotein OS=Homo sapiens OX=9606 GN=VASP PE=1 SV=3	615.14	805.425	120.134	221.812	529.702	362.757	325.915	307.787
678	TRUE	P40818|UBP8_HUMAN	2.99	3.4	3	3	Oxidation (M)	Ubiquitin carboxyl-terminal hydrolase 8 OS=Homo sapiens OX=9606 GN=USP8 PE=1 SV=1	910.751	883.163	424.746	411.587	353.455	403.741	324.758	320.734
378	TRUE	P08754|GNAI3_HUMAN	8.55	16.1	8	4	Oxidation (M)	Guanine nucleotide-binding protein G(i) subunit alpha OS=Homo sapiens OX=9606 GN=GNAI3 PE=1 SV=3	1647.56	1448.3	515.352	932.574	1663.7	2882.52	1725.61	1458.15
94	TRUE	P06576|ATPB_HUMAN	0.46	66.92	23	23	Oxidation (M)	ATP synthase subunit beta, mitochondrial OS=Homo sapiens OX=9606 GN=ATP5F1B PE=1 SV=3	31584.4	34077.3	18497.7	17425.7	16925.1	15354.1	19845.3	20697.8
50	TRUE	P05023|AT1A1_HUMAN	2.31	27.66	42	25	Carbamidomethylation; Oxidation (M)	Sodium/potassium-transporting ATPase subunit alpha-1 OS=Homo sapiens OX=9606 GN=ATP1A1 PE=1 SV=1	62018.5	70282.9	41432.3	52817.6	48371.4	36472	59692.1	92377.6
80	TRUE	P07900|HS90A_HUMAN	1.34	21.17	32	14	Carbamidomethylation; Oxidation (M)	Heat shock protein HSP 90-alpha OS=Homo sapiens OX=9606 GN=HSP90AA1 PE=1 SV=5	22082.1	15924.7	11497.8	11889.7	11084.9	7695.4	10260.6	11806.6
664	TRUE	Q9Y487|VPP2_HUMAN	0.49	6.31	4	4		V-type proton ATPase 116 kDa subunit a2 OS=Homo sapiens OX=9606 GN=ATP6V0A2 PE=1 SV=2	352.185	581.23	472.969	2658.35	184.587	2383.17	443.067	710.557
160	TRUE	P23743|DGKA_HUMAN	3.45	34.69	20	20	Carbamidomethylation; Oxidation (M)	Diacylglycerol kinase alpha OS=Homo sapiens OX=9606 GN=DGKA PE=1 SV=3	3658.36	3727.42	3354.96	3398.64	3097.59	4111.24	3135.27	3473.89
615	TRUE	O14763|TR10B_HUMAN	7.91	18.18	6	6	Oxidation (M)	Tumor necrosis factor receptor superfamily member 10B OS=Homo sapiens OX=9606 GN=TNFRSF10B PE=1 SV=2	4589.67	4693.76	3339.03	3305.15	1845.46	1307.53	1447.46	2302.12
339	TRUE	Q13033|STRN3_HUMAN	2.54	20.95	11	11	Carbamidomethylation	Striatin-3 OS=Homo sapiens OX=9606 GN=STRN3 PE=1 SV=3	3311.88	3307.85	533.879	660.261	855.877	694.688	849.414	461.506
680	TRUE	P0CG47|UBB_HUMAN	5.86	17.47	4	4		Polyubiquitin-B OS=Homo sapiens OX=9606 GN=UBB PE=1 SV=1	105415	109307	52837.1	54504.1	141267	127436	82744.7	81721.5
890	TRUE	Q9UBC2|EP15R_HUMAN	10.24	5.56	3	3		Epidermal growth factor receptor substrate 15-like 1 OS=Homo sapiens OX=9606 GN=EPS15L1 PE=1 SV=1	214.049	245.543	0	0	155.675	0	75.0196	133.519
114	TRUE	O95714|HERC2_HUMAN	5.11	7.26	27	27	Oxidation (M)	E3 ubiquitin-protein ligase HERC2 OS=Homo sapiens OX=9606 GN=HERC2 PE=1 SV=2	63338.7	57255.6	205140	478856	105600	191473	31955.5	12817.7
1100	TRUE	Q9BZM4|ULBP3_HUMAN	1.47	11.48	2	2	Oxidation (M)	UL16-binding protein 3 OS=Homo sapiens OX=9606 GN=ULBP3 PE=1 SV=1	373.148	374.462	1286.52	1355.25	184.342	1547.73	1074.21	125.062
428	TRUE	Q96JJ7|TMX3_HUMAN	20.75	23.35	9	9	Oxidation (M)	Protein disulfide-isomerase TMX3 OS=Homo sapiens OX=9606 GN=TMX3 PE=1 SV=2	1131.15	1953.22	2753.64	2697.45	382.035	759.123	871.316	817.951
248	TRUE	O94905|ERLN2_HUMAN	4.33	39.53	12	12	Oxidation (M)	Erlin-2 OS=Homo sapiens OX=9606 GN=ERLIN2 PE=1 SV=1	11842.3	11612.5	10222.1	10465.4	7741.83	7371.97	5500.77	6015.13
35	TRUE	Q6YHK3|CD109_HUMAN	5.6	46.85	54	54	Carbamidomethylation; Oxidation (M)	CD109 antigen OS=Homo sapiens OX=9606 GN=CD109 PE=1 SV=2	64062.7	68920.4	91774.6	89192.7	92808.8	98745	67646.1	53858
262	TRUE	O00468|AGRIN_HUMAN	0.25	2.51	4	4		Agrin OS=Homo sapiens OX=9606 GN=AGRN PE=1 SV=6	619.866	448.84	1059.06	1164.94	1063.99	379.213	527.055	571.682
582	TRUE	Q9ULV4|COR1C_HUMAN	2.79	19.2	7	7	Carbamidomethylation	Coronin-1C OS=Homo sapiens OX=9606 GN=CORO1C PE=1 SV=1	8027.27	8853.4	3745.67	3924.83	7173.4	6166.61	5246.57	6182.67
828	TRUE	P36543|VATE1_HUMAN	2.55	15.49	3	3	Oxidation (M)	V-type proton ATPase subunit E 1 OS=Homo sapiens OX=9606 GN=ATP6V1E1 PE=1 SV=1	902.275	669.921	275.627	515.932	697.779	345.755	642.614	806.567
134	TRUE	P30519|HMOX2_HUMAN	3.99	64.56	20	19	Acetylation (N-term); Carbamidomethylation; Oxidation (M)	Heme oxygenase 2 OS=Homo sapiens OX=9606 GN=HMOX2 PE=1 SV=2	40455.9	40901.7	19683.5	19168.2	37836.7	29762.4	34601.6	33011.1
498	TRUE	P49585|PCY1A_HUMAN	8.05	27.52	7	7	Oxidation (M)	Choline-phosphate cytidylyltransferase A OS=Homo sapiens OX=9606 GN=PCYT1A PE=1 SV=2	1494.02	1545.09	750.575	959.008	2423.1	2134.45	1127.3	1896.67
740	TRUE	Q8NB49|AT11C_HUMAN	3.44	5.65	5	5		Phospholipid-transporting ATPase IG OS=Homo sapiens OX=9606 GN=ATP11C PE=1 SV=3	706.259	719.079	960.154	858.056	234.584	971.195	505.304	555.364
459	TRUE	Q13613|MTMR1_HUMAN	0.05	9.47	6	5	Oxidation (M)	Myotubularin-related protein 1 OS=Homo sapiens OX=9606 GN=MTMR1 PE=1 SV=4	1391.06	1227.56	783.994	934.713	653.905	780.326	1097.76	881.256
549	TRUE	Q7KZI7|MARK2_HUMAN	7.83	3.93	4	2		Serine/threonine-protein kinase MARK2 OS=Homo sapiens OX=9606 GN=MARK2 PE=1 SV=2	128.556	356.197	139.553	147.949	450.534	301.504	157.772	336.834
56	TRUE	Q86UP2|KTN1_HUMAN	12.52	43.04	47	47	Oxidation (M)	Kinectin OS=Homo sapiens OX=9606 GN=KTN1 PE=1 SV=1	7385.45	7399.46	5685.58	5693.44	9015.84	10197.5	13424.3	13824.2
774	TRUE	P26045|PTN3_HUMAN	2.9	7.12	5	5		Tyrosine-protein phosphatase non-receptor type 3 OS=Homo sapiens OX=9606 GN=PTPN3 PE=1 SV=2	455.768	417.419	196.994	233.819	478.251	187.198	453.09	357.009
567	TRUE	Q9UM47|NOTC3_HUMAN	5.48	2.02	5	3	Oxidation (M)	Neurogenic locus notch homolog protein 3 OS=Homo sapiens OX=9606 GN=NOTCH3 PE=1 SV=2	388.428	236.724	187.695	185.795	276.898	147.249	555.728	958.473
485	TRUE	Q8NBS3|S4A11_HUMAN	6.66	12.57	8	8	Oxidation (M)	Sodium bicarbonate transporter-like protein 11 OS=Homo sapiens OX=9606 GN=SLC4A11 PE=1 SV=2	4800.38	4473.41	1042.38	1035.78	574.498	1042.67	524.439	694.473
644	TRUE	P43121|MUC18_HUMAN	8.31	11.3	5	5		Cell surface glycoprotein MUC18 OS=Homo sapiens OX=9606 GN=MCAM PE=1 SV=2	1333.97	1213.86	307.317	399.872	326.566	126.531	230.272	79.9518
1150	TRUE	Q00536|CDK16_HUMAN	3.84	4.44	2	2		Cyclin-dependent kinase 16 OS=Homo sapiens OX=9606 GN=CDK16 PE=1 SV=1	517.594	609.772	372.844	580.088	491.914	510.689	591.526	538.438
755	TRUE	Q8WUD1|RAB2B_HUMAN	17.23	30.09	5	5	Oxidation (M)	Ras-related protein Rab-2B OS=Homo sapiens OX=9606 GN=RAB2B PE=1 SV=1	1224.56	1340.5	1567.06	1429.67	2364.54	1904.24	2922.39	2308.35
444	TRUE	Q9UHN6|CEIP2_HUMAN	0.31	8.6	10	10	Oxidation (M)	Cell surface hyaluronidase OS=Homo sapiens OX=9606 GN=CEMIP2 PE=1 SV=1	2703.19	1787.74	1296.76	4029.95	3606.06	2560.82	1135.5	1088.32
1059	TRUE	Q8WUM9|S20A1_HUMAN	0.41	4.71	3	3		Sodium-dependent phosphate transporter 1 OS=Homo sapiens OX=9606 GN=SLC20A1 PE=1 SV=1	446.433	713.129	607.03	477.857	211.474	559.421	505.142	508.663
106	TRUE	Q92817|EVPL_HUMAN	17.18	15.54	24	24		Envoplakin OS=Homo sapiens OX=9606 GN=EVPL PE=1 SV=3	537.861	535.42	2226.54	2242.01	1980.45	1703.37	1477.01	1524.65
1228	TRUE	Q96BI1|S22AI_HUMAN	38.21	5.66	2	2		Solute carrier family 22 member 18 OS=Homo sapiens OX=9606 GN=SLC22A18 PE=1 SV=3	171.023	146.922	381.793	376.863	997.245	674.207	1124.96	974.458
854	TRUE	Q96IF1|AJUBA_HUMAN	12.3	8.92	4	4	Oxidation (M)	LIM domain-containing protein ajuba OS=Homo sapiens OX=9606 GN=AJUBA PE=1 SV=1	816.568	126.176	489.908	428.136	1469.98	792.244	602.224	890.075
213	TRUE	Q8IVT2|MISP_HUMAN	2.62	36.38	17	17		Mitotic interactor and substrate of PLK1 OS=Homo sapiens OX=9606 GN=MISP PE=1 SV=1	10298.5	9075.68	2692.45	2510.76	3666.95	2114	2146.27	2845.11
1258	TRUE	Q7Z2K8|GRIN1_HUMAN	4.81	3.08	2	2		G protein-regulated inducer of neurite outgrowth 1 OS=Homo sapiens OX=9606 GN=GPRIN1 PE=1 SV=2	244.358	251.779	59.7692	85.2495	377.204	193.51	225.694	114.987
215	TRUE	P19784|CSK22_HUMAN	10.05	58.86	15	15	Carbamidomethylation; Oxidation (M)	Casein kinase II subunit alpha' OS=Homo sapiens OX=9606 GN=CSNK2A2 PE=1 SV=1	12910.4	9600.69	7249.03	7948.07	16560.6	13112.7	17433	13220.8
641	TRUE	Q9H4G0|E41L1_HUMAN	2.11	3.63	4	3	Oxidation (M)	Band 4.1-like protein 1 OS=Homo sapiens OX=9606 GN=EPB41L1 PE=1 SV=2	3144.93	3266.88	16376.9	16573.3	4667.33	7992.88	7337.89	6786.01
500	TRUE	Q8NDI1|EHBP1_HUMAN	0.4	6.5	6	6	Oxidation (M)	EH domain-binding protein 1 OS=Homo sapiens OX=9606 GN=EHBP1 PE=1 SV=3	2092.52	2923.1	853.436	442.073	962.87	443.393	1049.23	1422.48
307	TRUE	Q96J02|ITCH_HUMAN	5.19	14.95	12	11		E3 ubiquitin-protein ligase Itchy homolog OS=Homo sapiens OX=9606 GN=ITCH PE=1 SV=2	1321.21	1417.25	933.497	923.365	1500.68	1128.35	1238.18	1625.31
768	TRUE	Q6P1N0|C2D1A_HUMAN	0.27	4.31	3	3		Coiled-coil and C2 domain-containing protein 1A OS=Homo sapiens OX=9606 GN=CC2D1A PE=1 SV=1	485.936	594.002	379.786	317.167	468.846	307.609	284.281	370.775
82	TRUE	P12830|CADH1_HUMAN	14.68	36.17	29	28	Carbamidomethylation; Oxidation (M)	Cadherin-1 OS=Homo sapiens OX=9606 GN=CDH1 PE=1 SV=3	131133	129215	140364	138002	248858	223613	166825	181928
972	TRUE	Q5JTD0|TJAP1_HUMAN	10.41	3.95	2	2		Tight junction-associated protein 1 OS=Homo sapiens OX=9606 GN=TJAP1 PE=1 SV=1	256.581	366.617	224.839	327.362	351.028	513.334	340.578	501.861
788	TRUE	Q9Y287|ITM2B_HUMAN	1.63	12.03	4	4		Integral membrane protein 2B OS=Homo sapiens OX=9606 GN=ITM2B PE=1 SV=1	1622.3	1969.39	1968.87	1985.87	1600.1	1268.56	1229.66	1293.54
830	TRUE	P61421|VA0D1_HUMAN	1.33	18.8	4	4		V-type proton ATPase subunit d 1 OS=Homo sapiens OX=9606 GN=ATP6V0D1 PE=1 SV=1	2299.69	2340.13	661.535	1735.4	2339.44	1081.83	1006.08	2082.25
1132	TRUE	Q8N138|ORML3_HUMAN	3.79	16.99	2	2	Acetylation (N-term); Oxidation (M)	ORM1-like protein 3 OS=Homo sapiens OX=9606 GN=ORMDL3 PE=1 SV=1	490.479	469.207	8379.4	8057.38	406.386	9643.52	104.879	343.344
773	TRUE	Q6IQ22|RAB12_HUMAN	9.19	14.34	3	3		Ras-related protein Rab-12 OS=Homo sapiens OX=9606 GN=RAB12 PE=1 SV=3	1122.25	1247.36	902.334	3655.05	686.235	567.724	736.975	569.924
51	TRUE	P29317|EPHA2_HUMAN	2.81	37.81	38	35	Carbamidomethylation; Oxidation (M)	Ephrin type-A receptor 2 OS=Homo sapiens OX=9606 GN=EPHA2 PE=1 SV=2	74741.1	79767.4	57812.7	58941.6	68777.6	69513	66692.6	58386.1
305	TRUE	P18085|ARF4_HUMAN	6.07	31.67	9	6	Carbamidomethylation; Oxidation (M)	ADP-ribosylation factor 4 OS=Homo sapiens OX=9606 GN=ARF4 PE=1 SV=3	10848.2	10363.7	3635.13	4123.25	4821.03	2573.75	1420.13	1757.7
93	TRUE	P10809|CH60_HUMAN	1.73	58.99	23	23	Carbamidomethylation; Oxidation (M)	60 kDa heat shock protein, mitochondrial OS=Homo sapiens OX=9606 GN=HSPD1 PE=1 SV=2	31088.2	36308.3	16847.2	22079.7	30476.1	36465.2	16134.4	19329.6
914	TRUE	P53597|SUCA_HUMAN	1.08	10.69	3	3	Oxidation (M)	Succinate--CoA ligase [ADP/GDP-forming] subunit alpha, mitochondrial OS=Homo sapiens OX=9606 GN=SUCLG1 PE=1 SV=4	1683.57	1727.83	235.616	110.491	731	44.6284	656.151	345.361
282	TRUE	Q5JWF2|GNAS1_HUMAN	4.81	12.73	10	10	Oxidation (M)	Guanine nucleotide-binding protein G(s) subunit alpha isoforms XLas OS=Homo sapiens OX=9606 GN=GNAS PE=1 SV=2	4643.63	4958.32	1853.47	1838.23	4371.52	4401.08	3483.07	3970.92
529	TRUE	P42566|EPS15_HUMAN	9.32	8.15	6	6		Epidermal growth factor receptor substrate 15 OS=Homo sapiens OX=9606 GN=EPS15 PE=1 SV=2	1374.54	812.663	1181.77	1060.95	1387.24	1713.6	1193.36	1156.93
692	TRUE	Q9BZL6|KPCD2_HUMAN	0.82	8.09	5	5	Carbamidomethylation	Serine/threonine-protein kinase D2 OS=Homo sapiens OX=9606 GN=PRKD2 PE=1 SV=3	3095.02	3186.3	757.223	531.227	1728.88	946.728	1328.44	1354.14
138	TRUE	Q15262|PTPRK_HUMAN	0.22	20.5	22	22	Carbamidomethylation; Oxidation (M)	Receptor-type tyrosine-protein phosphatase kappa OS=Homo sapiens OX=9606 GN=PTPRK PE=1 SV=2	266495	259691	177882	183224	164363	144688	181032	183809
298	TRUE	Q15758|AAAT_HUMAN	5.43	20.7	11	11	Acetylation (N-term); Carbamidomethylation; Oxidation (M)	Neutral amino acid transporter B(0) OS=Homo sapiens OX=9606 GN=SLC1A5 PE=1 SV=2	10729.7	8853.6	10707.6	10581.3	9976.39	9862.05	11282.5	11120.7
53	TRUE	Q9Y490|TLN1_HUMAN	12.75	23.06	42	39	Carbamidomethylation; Oxidation (M)	Talin-1 OS=Homo sapiens OX=9606 GN=TLN1 PE=1 SV=3	7401.69	7509.98	20425.3	20613.6	3708.37	13645	2196.79	3177.14
870	TRUE	O15126|SCAM1_HUMAN	4	13.91	3	3	Oxidation (M)	Secretory carrier-associated membrane protein 1 OS=Homo sapiens OX=9606 GN=SCAMP1 PE=1 SV=2	2001.51	2194.98	1072.43	934.088	656.307	584.621	881.278	887.477
403	TRUE	Q9UI12|VATH_HUMAN	2.95	27.95	9	9	Oxidation (M)	V-type proton ATPase subunit H OS=Homo sapiens OX=9606 GN=ATP6V1H PE=1 SV=1	2941.36	2974.16	1797.33	1471.57	1494.37	444.767	1614.22	1676.58
638	TRUE	Q7L5Y9|MAEA_HUMAN	7.25	23.99	7	7	Oxidation (M)	E3 ubiquitin-protein transferase MAEA OS=Homo sapiens OX=9606 GN=MAEA PE=1 SV=1	1123.94	1639.13	1140.53	886.657	2092.61	1151.35	1745.73	1688
89	TRUE	Q5JTH9|RRP12_HUMAN	0.18	32.15	29	29	Carbamidomethylation; Oxidation (M)	RRP12-like protein OS=Homo sapiens OX=9606 GN=RRP12 PE=1 SV=2	23833.5	24423.9	3143.93	3163.91	8094.39	4383.9	6780.17	7731.92
522	TRUE	P00749|UROK_HUMAN	5.06	20.19	8	8	Oxidation (M)	Urokinase-type plasminogen activator OS=Homo sapiens OX=9606 GN=PLAU PE=1 SV=2	12064.7	12711.1	7847.25	8380.41	6484.12	5236.49	6599.48	2939.65
523	TRUE	Q9UGI8|TES_HUMAN	5.36	22.09	8	8	Carbamidomethylation; Oxidation (M)	Testin OS=Homo sapiens OX=9606 GN=TES PE=1 SV=1	2789.59	1910.21	6157.46	635.769	1998.13	1131.24	557.967	260.007
392	TRUE	Q96SB4|SRPK1_HUMAN	10.81	21.53	10	10	Carbamidomethylation; Oxidation (M)	SRSF protein kinase 1 OS=Homo sapiens OX=9606 GN=SRPK1 PE=1 SV=2	4441.73	4439.42	2830.51	1745.56	1326.95	459.799	734.312	994.764
1047	TRUE	Q86UT6|NLRX1_HUMAN	2.53	3.18	2	2		NLR family member X1 OS=Homo sapiens OX=9606 GN=NLRX1 PE=1 SV=1	678.019	536.818	385.56	393.806	352.361	275.251	188.644	413.636
400	TRUE	Q8N2K0|ABD12_HUMAN	0.27	34.67	10	10	Oxidation (M)	Lysophosphatidylserine lipase ABHD12 OS=Homo sapiens OX=9606 GN=ABHD12 PE=1 SV=2	3557.52	3611.02	3361.42	3450.77	4446.13	1193.16	3176.64	3935.76
749	TRUE	P15529|MCP_HUMAN	1.56	8.93	6	6	Carbamidomethylation; Oxidation (M)	Membrane cofactor protein OS=Homo sapiens OX=9606 GN=CD46 PE=1 SV=3	25320.4	24609.1	7497.15	7278.32	16923	7607.97	5105.18	6957.72
417	TRUE	Q9P258|RCC2_HUMAN	3.42	28.35	9	9	Carbamidomethylation; Oxidation (M)	Protein RCC2 OS=Homo sapiens OX=9606 GN=RCC2 PE=1 SV=2	5345.73	5601.98	3106.46	2775.86	5388.35	3205.1	4724.27	5242
234	TRUE	Q9UQB8|BAIP2_HUMAN	18.39	37.32	16	16	Carbamidomethylation; Oxidation (M)	Brain-specific angiogenesis inhibitor 1-associated protein 2 OS=Homo sapiens OX=9606 GN=BAIAP2 PE=1 SV=1	3743.38	3252.55	2533.98	2172.32	7993	7105.56	10803	7013.35
303	TRUE	O95817|BAG3_HUMAN	27.83	31.13	14	14	Oxidation (M)	BAG family molecular chaperone regulator 3 OS=Homo sapiens OX=9606 GN=BAG3 PE=1 SV=3	2044.07	2526.05	2074.96	2259.57	7026.25	7325.36	6874	7339.61
182	TRUE	Q04912|RON_HUMAN	0.9	19	19	19	Carbamidomethylation; Oxidation (M)	Macrophage-stimulating protein receptor OS=Homo sapiens OX=9606 GN=MST1R PE=1 SV=3	9515.95	10061.4	2383.16	2324.07	3435.88	1834.92	4064.76	4004.29
1019	TRUE	Q96S97|MYADM_HUMAN	0.99	10.25	2	2	Oxidation (M)	Myeloid-associated differentiation marker OS=Homo sapiens OX=9606 GN=MYADM PE=1 SV=2	8992.99	8530.14	1424.23	2663.04	2765.01	1616.2	2787.76	4107.32
531	TRUE	P55010|IF5_HUMAN	7.46	18.1	7	7	Oxidation (M)	Eukaryotic translation initiation factor 5 OS=Homo sapiens OX=9606 GN=EIF5 PE=1 SV=2	2700.25	2843.1	2428.76	2278.07	2125.8	3744.54	3176.14	4694.03
154	TRUE	O00159|MYO1C_HUMAN	6.84	23.61	20	19	Oxidation (M)	Unconventional myosin-Ic OS=Homo sapiens OX=9606 GN=MYO1C PE=1 SV=4	4970.2	6357.55	3237	3052.21	7033.8	5302.22	6389.11	5501.74
727	TRUE	Q9Y6M5|ZNT1_HUMAN	0.44	22.49	6	6		Zinc transporter 1 OS=Homo sapiens OX=9606 GN=SLC30A1 PE=1 SV=3	19879.5	22579.8	5629.53	5702.75	9003	6332.89	7411.84	9513.79
330	TRUE	P19634|SL9A1_HUMAN	3.2	14.85	10	10	Oxidation (M)	Sodium/hydrogen exchanger 1 OS=Homo sapiens OX=9606 GN=SLC9A1 PE=1 SV=2	9113.29	8206.85	3890.59	3241.97	6872.13	5177.72	7274.64	6611.55
1140	TRUE	O75608|LYPA1_HUMAN	1.06	16.09	2	2		Acyl-protein thioesterase 1 OS=Homo sapiens OX=9606 GN=LYPLA1 PE=1 SV=1	3144.1	3087.3	426.236	426.262	1428.24	808.411	1106.65	1387.32
9	TRUE	P10586|PTPRF_HUMAN	17.65	51.28	93	84	Carbamidomethylation; Oxidation (M)	Receptor-type tyrosine-protein phosphatase F OS=Homo sapiens OX=9606 GN=PTPRF PE=1 SV=2	37592.6	38797.2	49663.6	49808.5	60101.1	58402.6	70170.7	64551.4
1074	TRUE	Q08334|I10R2_HUMAN	13.08	11.08	3	3	Oxidation (M)	Interleukin-10 receptor subunit beta OS=Homo sapiens OX=9606 GN=IL10RB PE=1 SV=2	759.917	858.446	1301.87	1260.3	2367.22	1355.39	969.223	1412.69
462	TRUE	Q8NBU5|ATAD1_HUMAN	5.6	32.41	8	8	Carbamidomethylation; Oxidation (M)	ATPase family AAA domain-containing protein 1 OS=Homo sapiens OX=9606 GN=ATAD1 PE=1 SV=1	11507.7	11567.2	3640.7	3723.57	9282.45	7874.02	13531.7	11939.1
295	TRUE	P61106|RAB14_HUMAN	11.69	72.09	12	12	Carbamidomethylation; Oxidation (M)	Ras-related protein Rab-14 OS=Homo sapiens OX=9606 GN=RAB14 PE=1 SV=4	8337.75	7791.81	7544.11	6468.11	10893.8	10846.9	11717.3	11570.2
130	TRUE	Q12860|CNTN1_HUMAN	2.67	29.47	22	22	Oxidation (M)	Contactin-1 OS=Homo sapiens OX=9606 GN=CNTN1 PE=1 SV=1	8198.42	12637.4	5575.03	6293.33	4329.81	3692.01	4853.33	5895.42
738	TRUE	O43159|RRP8_HUMAN	2.27	19.3	6	6		Ribosomal RNA-processing protein 8 OS=Homo sapiens OX=9606 GN=RRP8 PE=1 SV=2	6180.93	6714.89	1796.15	1586.76	1127.76	1217.02	2314.01	3077.13
255	TRUE	O43491|E41L2_HUMAN	0.99	11.84	11	10	Oxidation (M)	Band 4.1-like protein 2 OS=Homo sapiens OX=9606 GN=EPB41L2 PE=1 SV=1	2065.15	2160.33	127.392	1260.95	659	1579.75	561.04	1219.55
711	TRUE	Q8N158|GPC2_HUMAN	2.73	10.71	4	4		Glypican-2 OS=Homo sapiens OX=9606 GN=GPC2 PE=2 SV=1	1585.44	1556.36	985.502	908.836	707.465	547.344	828.447	879.857
467	TRUE	P55011|S12A2_HUMAN	2.12	5.78	5	5	Oxidation (M)	Solute carrier family 12 member 2 OS=Homo sapiens OX=9606 GN=SLC12A2 PE=1 SV=1	1345.99	1091.87	581.518	2279.43	851.72	507.725	750.469	927.642
866	TRUE	P55201|BRPF1_HUMAN	33.22	3.13	4	4		Peregrin OS=Homo sapiens OX=9606 GN=BRPF1 PE=1 SV=2	579.022	456.055	801.314	853.842	1633.32	1592.61	1129.56	1191.45
466	TRUE	P46459|NSF_HUMAN	0.58	17.2	10	10	Oxidation (M)	Vesicle-fusing ATPase OS=Homo sapiens OX=9606 GN=NSF PE=1 SV=3	2318.11	2853.42	740.227	907.806	1559.63	788.964	1571.5	1327.09
185	TRUE	P22735|TGM1_HUMAN	43.38	29.25	18	18	Oxidation (M)	Protein-glutamine gamma-glutamyltransferase K OS=Homo sapiens OX=9606 GN=TGM1 PE=1 SV=4	1063.61	611.108	975.153	975.692	7539.58	7408.55	8034.49	8314.54
710	TRUE	Q9H2J7|S6A15_HUMAN	4.57	10	5	5		Sodium-dependent neutral amino acid transporter B(0)AT2 OS=Homo sapiens OX=9606 GN=SLC6A15 PE=1 SV=1	3212.28	2918.03	1373.95	2130.56	1100.42	818.16	1367.37	1367.63
296	TRUE	P32004|L1CAM_HUMAN	10.11	11.61	12	12	Oxidation (M)	Neural cell adhesion molecule L1 OS=Homo sapiens OX=9606 GN=L1CAM PE=1 SV=2	27150.6	22253.7	55343.6	58498.7	24001	15340.5	25481.8	6378.53
54	TRUE	P08238|HS90B_HUMAN	5	36.19	42	24	Carbamidomethylation; Oxidation (M)	Heat shock protein HSP 90-beta OS=Homo sapiens OX=9606 GN=HSP90AB1 PE=1 SV=4	115693	105901	61435.8	60901.6	47507.9	45157	34074.5	39521.1
564	TRUE	Q9H6X2|ANTR1_HUMAN	1.1	12.06	6	5	Oxidation (M)	Anthrax toxin receptor 1 OS=Homo sapiens OX=9606 GN=ANTXR1 PE=1 SV=2	1556.81	1619.07	538.211	425.077	960.118	679.27	508.483	319.397
225	TRUE	Q8TEW0|PARD3_HUMAN	0.52	13.35	16	16	Oxidation (M)	Partitioning defective 3 homolog OS=Homo sapiens OX=9606 GN=PARD3 PE=1 SV=2	1999.29	1890.14	710.711	10814.8	1029.85	5470.5	1023.58	1308.87
1053	TRUE	Q15014|MO4L2_HUMAN	1.16	12.85	3	3	Oxidation (M)	Mortality factor 4-like protein 2 OS=Homo sapiens OX=9606 GN=MORF4L2 PE=1 SV=1	1034.03	1397.98	1625.84	582.1	919.23	615.078	1362.37	1181.3
629	TRUE	O60353|FZD6_HUMAN	10.85	7.08	4	4	Carbamidomethylation; Oxidation (M)	Frizzled-6 OS=Homo sapiens OX=9606 GN=FZD6 PE=1 SV=2	2480.9	1940.97	1794.67	1864.78	2841.62	3659.71	2203.56	3726.32
637	TRUE	P35613|BASI_HUMAN	9.06	17.66	5	5	Oxidation (M)	Basigin OS=Homo sapiens OX=9606 GN=BSG PE=1 SV=2	5539.91	5947.27	8060.55	7880.09	5620.58	8239.8	6908.49	7430.38
902	TRUE	Q9BZR6|RTN4R_HUMAN	9.54	6.55	3	3		Reticulon-4 receptor OS=Homo sapiens OX=9606 GN=RTN4R PE=1 SV=1	2100.08	2748.7	1354.89	1324.27	994.836	686.275	325.408	533.338
967	TRUE	Q8IZ07|AN13A_HUMAN	5.35	6.44	3	3		Ankyrin repeat domain-containing protein 13A OS=Homo sapiens OX=9606 GN=ANKRD13A PE=1 SV=3	323.824	319.063	261.847	204.407	396.184	348.862	273.581	279.698
548	TRUE	Q96JB2|COG3_HUMAN	1.84	9.42	6	6	Acetylation (N-term); Oxidation (M)	Conserved oligomeric Golgi complex subunit 3 OS=Homo sapiens OX=9606 GN=COG3 PE=1 SV=3	1215.1	1150.55	701.119	1026.77	529.466	1328.56	606.438	448.78
943	TRUE	Q9NS86|LANC2_HUMAN	12.59	7.33	3	3	Oxidation (M)	LanC-like protein 2 OS=Homo sapiens OX=9606 GN=LANCL2 PE=1 SV=1	676.689	707.996	1299.81	1554.29	1206.77	904.824	1419.05	1172.21
1201	TRUE	P78325|ADAM8_HUMAN	6.65	3.4	2	2		Disintegrin and metalloproteinase domain-containing protein 8 OS=Homo sapiens OX=9606 GN=ADAM8 PE=1 SV=2	259.88	313.794	393.85	185.583	156.338	181.297	152.315	95.231
700	TRUE	Q08209|PP2BA_HUMAN	3.73	9.4	4	4	Oxidation (M)	Serine/threonine-protein phosphatase 2B catalytic subunit alpha isoform OS=Homo sapiens OX=9606 GN=PPP3CA PE=1 SV=1	1105.21	1086.39	1741.72	1297.24	796.685	1093.33	994.116	687.912
624	TRUE	Q9UQC9|CLCA2_HUMAN	19.83	9.97	6	6	Oxidation (M)	Calcium-activated chloride channel regulator 2 OS=Homo sapiens OX=9606 GN=CLCA2 PE=1 SV=2	540.052	560.004	780.823	897.182	967.062	917.516	1335.4	877.109
317	TRUE	Q9HCK8|CHD8_HUMAN	0.99	5.58	10	10	Oxidation (M)	Chromodomain-helicase-DNA-binding protein 8 OS=Homo sapiens OX=9606 GN=CHD8 PE=1 SV=5	1268.48	912.299	407.956	448.626	755.366	562.635	393.004	883.53
894	TRUE	P30825|SL7A1_HUMAN	0.13	6.36	4	3	Carbamidomethylation; Oxidation (M)	High affinity cationic amino acid transporter 1 OS=Homo sapiens OX=9606 GN=SLC7A1 PE=1 SV=1	2446.23	2535.13	1030.1	1265.04	1311.37	780.868	1706.66	1933.44
751	TRUE	P41743|KPCI_HUMAN	2.89	9.9	4	4		Protein kinase C iota type OS=Homo sapiens OX=9606 GN=PRKCI PE=1 SV=2	1319.11	874.517	717.001	587.184	680.136	1356.34	820.344	743.621
369	TRUE	Q8WUX1|S38A5_HUMAN	35.16	12.08	5	5	Oxidation (M)	Sodium-coupled neutral amino acid transporter 5 OS=Homo sapiens OX=9606 GN=SLC38A5 PE=1 SV=1	9002.36	9441.05	7035.4	8463.01	271.324	1016.08	283.384	238.527
596	TRUE	P51159|RB27A_HUMAN	3.13	23.98	5	5		Ras-related protein Rab-27A OS=Homo sapiens OX=9606 GN=RAB27A PE=1 SV=3	1126.13	806.141	16584.1	223.905	1161.36	16533.9	994.229	1565.56
1079	TRUE	Q14728|MFS10_HUMAN	4.09	7.47	3	3		Major facilitator superfamily domain-containing protein 10 OS=Homo sapiens OX=9606 GN=MFSD10 PE=1 SV=1	1155.28	1309.31	435.772	837.804	982.288	1047.43	1408.16	846.818
668	TRUE	Q8NHP6|MSPD2_HUMAN	3.58	11.78	5	5		Motile sperm domain-containing protein 2 OS=Homo sapiens OX=9606 GN=MOSPD2 PE=1 SV=1	1596.49	1802.1	811.936	815.347	1821.08	1631.15	1106.26	1038.71
363	TRUE	Q9BTX1|NDC1_HUMAN	6.59	17.06	9	9	Oxidation (M)	Nucleoporin NDC1 OS=Homo sapiens OX=9606 GN=NDC1 PE=1 SV=2	4327.43	5126.95	1687.17	2006.08	1306.92	1512.58	966.657	911.003
362	TRUE	P20936|RASA1_HUMAN	4.54	14.23	10	10	Carbamidomethylation; Oxidation (M)	Ras GTPase-activating protein 1 OS=Homo sapiens OX=9606 GN=RASA1 PE=1 SV=1	2940.07	2883.78	1123.54	696.69	657.399	777.754	626.119	745.882
823	TRUE	Q9NRU3|CNNM1_HUMAN	0.95	2.21	5	2		Metal transporter CNNM1 OS=Homo sapiens OX=9606 GN=CNNM1 PE=1 SV=3	538.595	496.028	180.238	260.141	353.384	409.244	163.306	354.525
204	TRUE	O60292|SI1L3_HUMAN	8.49	10.61	15	15	Oxidation (M)	Signal-induced proliferation-associated 1-like protein 3 OS=Homo sapiens OX=9606 GN=SIPA1L3 PE=1 SV=3	2739.56	2691.68	823.25	1030.99	512.96	633.588	462.525	391.885
824	TRUE	Q92542|NICA_HUMAN	30.96	8.04	4	4	Oxidation (M)	Nicastrin OS=Homo sapiens OX=9606 GN=NCSTN PE=1 SV=2	321.195	414.17	643.611	760.327	1633.59	1416.56	1709.25	777.165
246	TRUE	Q6NSJ5|LRC8E_HUMAN	6.85	20.23	12	11	Oxidation (M)	Volume-regulated anion channel subunit LRRC8E OS=Homo sapiens OX=9606 GN=LRRC8E PE=1 SV=2	3250.98	3079.64	1326.93	1661.64	3631.78	2620.48	3462.05	3956.33
820	TRUE	O14641|DVL2_HUMAN	2.78	5.43	4	3	Oxidation (M)	Segment polarity protein dishevelled homolog DVL-2 OS=Homo sapiens OX=9606 GN=DVL2 PE=1 SV=1	234.64	663.057	470.384	622.372	561.765	618.755	443.513	258.593
517	TRUE	Q9ULG1|INO80_HUMAN	3.37	4.69	6	6		Chromatin-remodeling ATPase INO80 OS=Homo sapiens OX=9606 GN=INO80 PE=1 SV=2	589.239	698.335	512.335	603.507	388.802	323.537	339.966	433.082
536	TRUE	Q9UN70|PCDGK_HUMAN	6.89	8.14	8	6		Protocadherin gamma-C3 OS=Homo sapiens OX=9606 GN=PCDHGC3 PE=1 SV=1	461.526	532.584	405.832	302.829	753.563	347.656	782.934	643.816
980	TRUE	Q7Z4W1|DCXR_HUMAN	2.8	9.43	2	2		L-xylulose reductase OS=Homo sapiens OX=9606 GN=DCXR PE=1 SV=2	398.342	357.477	4059.19	4430.2	181.668	5741.75	211.656	430.286
1038	TRUE	Q9BUZ4|TRAF4_HUMAN	6.04	8.3	3	3		TNF receptor-associated factor 4 OS=Homo sapiens OX=9606 GN=TRAF4 PE=1 SV=1	881.386	687.363	0	0	570.83	89.1102	503.174	437.388
887	TRUE	Q14451|GRB7_HUMAN	2.21	7.52	3	3		Growth factor receptor-bound protein 7 OS=Homo sapiens OX=9606 GN=GRB7 PE=1 SV=2	2171.28	2107.84	2174.19	1968.77	917.259	1636.51	1612.8	1687.82
503	TRUE	P05120|PAI2_HUMAN	1.06	8.19	3	3	Oxidation (M)	Plasminogen activator inhibitor 2 OS=Homo sapiens OX=9606 GN=SERPINB2 PE=1 SV=2	5411.09	4817.89	45185.3	48112.2	9597.36	27280.5	13081.5	3380.62
682	TRUE	Q14699|RFTN1_HUMAN	4.63	7.09	3	3		Raftlin OS=Homo sapiens OX=9606 GN=RFTN1 PE=1 SV=4	838.745	787.057	173.515	149.129	97.0903	111.956	223.176	135.739
1256	TRUE	Q9BZF3|OSBL6_HUMAN	4.74	2.89	2	2		Oxysterol-binding protein-related protein 6 OS=Homo sapiens OX=9606 GN=OSBPL6 PE=1 SV=1	290.491	288.736	92.1153	82.5957	282.327	216.327	276.459	175.986
706	TRUE	Q8TAG9|EXOC6_HUMAN	21.6	4.6	3	3	Acetylation (N-term)	Exocyst complex component 6 OS=Homo sapiens OX=9606 GN=EXOC6 PE=1 SV=3	150.187	181.643	180.421	158.326	344.994	353.02	442.232	312.888
850	TRUE	P18827|SDC1_HUMAN	28.92	15.81	4	4		Syndecan-1 OS=Homo sapiens OX=9606 GN=SDC1 PE=1 SV=3	768.275	666.82	717.751	656.848	3384.95	2437.92	2632.57	2443.8
572	TRUE	P16422|EPCAM_HUMAN	1.23	25.8	6	6	Carbamidomethylation; Oxidation (M)	Epithelial cell adhesion molecule OS=Homo sapiens OX=9606 GN=EPCAM PE=1 SV=2	12986.2	12208.4	11141.4	11182.4	8925.81	8594.49	11255.7	13286
809	TRUE	Q8WWI1|LMO7_HUMAN	6.06	3.68	5	5	Oxidation (M)	LIM domain only protein 7 OS=Homo sapiens OX=9606 GN=LMO7 PE=1 SV=3	1072.76	613.578	1659.63	1739.42	746.03	513.828	663.375	908.67
318	TRUE	Q01650|LAT1_HUMAN	16.62	21.5	8	8	Carbamidomethylation; Oxidation (M)	Large neutral amino acids transporter small subunit 1 OS=Homo sapiens OX=9606 GN=SLC7A5 PE=1 SV=2	50734.7	50150.7	50216.1	52035.8	94148.1	77720.2	88814.7	97054
625	TRUE	P67775|PP2AA_HUMAN	14.41	21.36	5	4	Carbamidomethylation; Oxidation (M)	Serine/threonine-protein phosphatase 2A catalytic subunit alpha isoform OS=Homo sapiens OX=9606 GN=PPP2CA PE=1 SV=1	4316.13	1093.56	2431.06	1059.18	228.572	505.217	601.784	333.029
344	TRUE	P54709|AT1B3_HUMAN	3.54	43.37	12	12	Oxidation (M)	Sodium/potassium-transporting ATPase subunit beta-3 OS=Homo sapiens OX=9606 GN=ATP1B3 PE=1 SV=1	19264.2	18940.2	31274.9	29417.4	12497.6	26734.5	29817.4	25739.4
789	TRUE	Q8N5A5|ZGPAT_HUMAN	3.56	9.98	4	4		Zinc finger CCCH-type with G patch domain-containing protein OS=Homo sapiens OX=9606 GN=ZGPAT PE=1 SV=3	920.425	943.958	791.163	797.605	526.222	910.146	552.052	256.674
725	TRUE	P18084|ITB5_HUMAN	2.7	4.38	3	3	Oxidation (M)	Integrin beta-5 OS=Homo sapiens OX=9606 GN=ITGB5 PE=1 SV=1	3153.8	2668.02	2602.4	2345.19	1788.31	1518.1	1926.83	1704.43
389	TRUE	Q96EY7|PTCD3_HUMAN	2.37	18.87	11	11	Carbamidomethylation; Oxidation (M)	Pentatricopeptide repeat domain-containing protein 3, mitochondrial OS=Homo sapiens OX=9606 GN=PTCD3 PE=1 SV=3	4380.16	4100.44	1312.22	1510.48	1380.25	1093.27	1556.27	1527.37
336	TRUE	P27105|STOM_HUMAN	3.64	36.46	7	7	Oxidation (M)	Stomatin OS=Homo sapiens OX=9606 GN=STOM PE=1 SV=3	11769.3	11223.7	4362.16	3799.99	10689.7	9252.35	7570.15	6997.9
614	TRUE	Q6P9F7|LRC8B_HUMAN	7.84	7.1	4	4	Carbamidomethylation	Volume-regulated anion channel subunit LRRC8B OS=Homo sapiens OX=9606 GN=LRRC8B PE=1 SV=2	800.18	705.036	6515.34	4049.33	947.137	553.731	729.306	1131.32
136	TRUE	Q86YZ3|HORN_HUMAN	1.61	1.72	3	3		Hornerin OS=Homo sapiens OX=9606 GN=HRNR PE=1 SV=2	83.0999	304.238	0	0	119.55	59.8328	186.005	272.758
49	TRUE	P17301|ITA2_HUMAN	5.58	38.27	41	41	Carbamidomethylation; Oxidation (M)	Integrin alpha-2 OS=Homo sapiens OX=9606 GN=ITGA2 PE=1 SV=1	96612.2	116409	67418.1	70585.6	56838.4	56218.1	33855.4	30138.6
911	TRUE	Q9C037|TRIM4_HUMAN	0.33	6.4	3	3	Oxidation (M)	E3 ubiquitin-protein ligase TRIM4 OS=Homo sapiens OX=9606 GN=TRIM4 PE=1 SV=2	635.649	558.773	110.618	157.461	322.076	130.229	320.272	234.855
299	TRUE	Q9NQX3|GEPH_HUMAN	3.81	22.55	11	11	Acetylation (N-term); Carbamidomethylation; Oxidation (M)	Gephyrin OS=Homo sapiens OX=9606 GN=GPHN PE=1 SV=1	2055.8	1972.67	212.059	730.105	610.679	291.081	263.966	334.216
39	TRUE	P08670|VIME_HUMAN	24.28	60.09	50	43	Carbamidomethylation; Oxidation (M)	Vimentin OS=Homo sapiens OX=9606 GN=VIM PE=1 SV=4	126392	132253	18930.7	20501.5	1070.81	912.451	1209.12	1142.57
1012	TRUE	Q96QD8|S38A2_HUMAN	5.42	10.47	3	3		Sodium-coupled neutral amino acid transporter 2 OS=Homo sapiens OX=9606 GN=SLC38A2 PE=1 SV=2	4512.08	4658.63	2144.14	2757.43	4194.49	2709.04	6439.77	6919.14
722	TRUE	O60462|NRP2_HUMAN	2.6	6.87	5	5		Neuropilin-2 OS=Homo sapiens OX=9606 GN=NRP2 PE=1 SV=3	2651.67	2912.38	1662.38	1048.95	1462.91	953.762	867.005	1241.78
657	TRUE	P49841|GSK3B_HUMAN	1.8	21.9	6	6	Oxidation (M)	Glycogen synthase kinase-3 beta OS=Homo sapiens OX=9606 GN=GSK3B PE=1 SV=2	1658.98	1817.71	854.925	660.353	1319.99	797.676	1410.73	1147.4
649	TRUE	Q9H2K8|TAOK3_HUMAN	19.88	6.35	4	4		Serine/threonine-protein kinase TAO3 OS=Homo sapiens OX=9606 GN=TAOK3 PE=1 SV=2	406.297	598.903	609.654	1020.01	1181.88	896.211	1384.97	1503.7
15	TRUE	P49327|FAS_HUMAN	3.71	44.6	87	87	Acetylation (N-term); Carbamidomethylation; Oxidation (M)	Fatty acid synthase OS=Homo sapiens OX=9606 GN=FASN PE=1 SV=3	46013.5	47668.2	14588.1	14533.2	18577	15283.9	9566.25	8616.53
356	TRUE	Q15019|SEPT2_HUMAN	5.02	36.84	10	10	Oxidation (M)	Septin-2 OS=Homo sapiens OX=9606 GN=SEPTIN2 PE=1 SV=1	5078.94	5332.69	2527.7	3189.85	4355.81	4714.06	4455.61	5955.7
844	TRUE	Q86UK0|ABCAC_HUMAN	7.09	1.19	3	3	Oxidation (M)	ATP-binding cassette sub-family A member 12 OS=Homo sapiens OX=9606 GN=ABCA12 PE=1 SV=3	233.635	235.062	269.769	212.155	181.92	337.37	254.068	453.339
377	TRUE	Q07666|KHDR1_HUMAN	1.29	27.54	10	10	Oxidation (M)	KH domain-containing, RNA-binding, signal transduction-associated protein 1 OS=Homo sapiens OX=9606 GN=KHDRBS1 PE=1 SV=1	31283.9	34402.5	15657	15186.6	24580.9	15282.4	23585.5	21742.7
556	TRUE	Q96P48|ARAP1_HUMAN	2.22	7.52	7	7		Arf-GAP with Rho-GAP domain, ANK repeat and PH domain-containing protein 1 OS=Homo sapiens OX=9606 GN=ARAP1 PE=1 SV=3	1897.42	1116.8	3006.95	3400.53	1805.64	2120.06	1699.78	802.446
753	TRUE	O75131|CPNE3_HUMAN	6.5	7.08	4	4		Copine-3 OS=Homo sapiens OX=9606 GN=CPNE3 PE=1 SV=1	1392.88	1359.38	855.901	483.598	488.411	394.337	394.079	291.977
42	TRUE	O75051|PLXA2_HUMAN	7.87	26.08	48	38	Carbamidomethylation; Oxidation (M)	Plexin-A2 OS=Homo sapiens OX=9606 GN=PLXNA2 PE=1 SV=4	13747.3	15353.3	8518.18	8031.67	15902.1	15607.9	17695.4	16739.5
966	TRUE	Q9BPZ7|SIN1_HUMAN	0.28	6.7	3	3	Acetylation (N-term)	Target of rapamycin complex 2 subunit MAPKAP1 OS=Homo sapiens OX=9606 GN=MAPKAP1 PE=1 SV=2	2567.88	2510.04	1019.45	996.409	1346.67	1131.38	1206.91	1628.96
278	TRUE	O75534|CSDE1_HUMAN	0.49	22.31	13	13	Carbamidomethylation; Oxidation (M)	Cold shock domain-containing protein E1 OS=Homo sapiens OX=9606 GN=CSDE1 PE=1 SV=2	6608.06	6692.07	1366.21	1276.93	2770.96	2627.12	2375.08	2541.88
762	TRUE	P67870|CSK2B_HUMAN	6.51	26.98	5	5	Carbamidomethylation; Oxidation (M)	Casein kinase II subunit beta OS=Homo sapiens OX=9606 GN=CSNK2B PE=1 SV=1	22082.3	22159.2	15088.9	15651.7	23764.3	20123.5	26171.6	25339.8
845	TRUE	P56962|STX17_HUMAN	3.33	20.53	3	3		Syntaxin-17 OS=Homo sapiens OX=9606 GN=STX17 PE=1 SV=2	528.548	587.153	237.794	64.8559	444.551	119.59	556.343	982.858
658	TRUE	Q9H6B4|CLMP_HUMAN	4.65	19.57	4	4	Oxidation (M)	CXADR-like membrane protein OS=Homo sapiens OX=9606 GN=CLMP PE=1 SV=1	2682.91	2482.26	1408.98	2216.25	2247.78	1536.59	715.379	395.486
1175	TRUE	P32970|CD70_HUMAN	0.17	12.44	2	2		CD70 antigen OS=Homo sapiens OX=9606 GN=CD70 PE=1 SV=2	277.54	266.791	81.9702	75.9519	106.413	84.0634	160.325	109.84
366	TRUE	Q9H8M5|CNNM2_HUMAN	18.52	5.94	9	4	Oxidation (M)	Metal transporter CNNM2 OS=Homo sapiens OX=9606 GN=CNNM2 PE=1 SV=2	268.308	426.718	726.723	720.581	1245.54	586.956	1281.86	1474.66
540	TRUE	P04632|CPNS1_HUMAN	4.03	37.31	6	6	Acetylation (N-term); Carbamidomethylation; Oxidation (M)	Calpain small subunit 1 OS=Homo sapiens OX=9606 GN=CAPNS1 PE=1 SV=1	1218.78	1032.16	984.908	1007.08	2047.42	715.578	1051.31	1320.69
414	TRUE	O95793|STAU1_HUMAN	3.45	20.28	10	10	Oxidation (M)	Double-stranded RNA-binding protein Staufen homolog 1 OS=Homo sapiens OX=9606 GN=STAU1 PE=1 SV=2	987.5	997.417	899.12	927.776	776.771	626.517	625.143	405.989
401	TRUE	Q16658|FSCN1_HUMAN	4.55	23.12	9	9	Carbamidomethylation	Fascin OS=Homo sapiens OX=9606 GN=FSCN1 PE=1 SV=3	5272.56	5742.1	992.944	1548.85	1705.88	756.15	918.995	863.746
59	TRUE	O60610|DIAP1_HUMAN	7.83	36.01	37	37	Carbamidomethylation; Oxidation (M)	Protein diaphanous homolog 1 OS=Homo sapiens OX=9606 GN=DIAPH1 PE=1 SV=2	4126.05	2435.86	5244.47	4800.24	4380	3049.22	7228.9	7312.56
1206	TRUE	Q15361|TTF1_HUMAN	1.8	3.87	2	2		Transcription termination factor 1 OS=Homo sapiens OX=9606 GN=TTF1 PE=1 SV=3	372.333	384.252	181.551	182.42	164.243	122.84	234.874	158.732
856	TRUE	Q9NR28|DBLOH_HUMAN	1.28	16.74	4	4	Oxidation (M)	Diablo homolog, mitochondrial OS=Homo sapiens OX=9606 GN=DIABLO PE=1 SV=1	1624.98	1880.82	192.366	257.082	942.19	480.005	649.991	637.43
558	TRUE	Q9Y5G0|PCDGH_HUMAN	44.06	4.12	5	3	Oxidation (M)	Protocadherin gamma-B5 OS=Homo sapiens OX=9606 GN=PCDHGB5 PE=2 SV=1	98.3565	95.6185	161.211	179.438	714.808	493.949	643.766	620.109
489	TRUE	O75882|ATRN_HUMAN	13.97	10.22	9	9	Oxidation (M)	Attractin OS=Homo sapiens OX=9606 GN=ATRN PE=1 SV=2	1367.44	1433.43	3323.7	2911.07	438.442	2273.7	225.978	242.036
157	TRUE	Q86W92|LIPB1_HUMAN	6.84	23.84	18	18	Oxidation (M)	Liprin-beta-1 OS=Homo sapiens OX=9606 GN=PPFIBP1 PE=1 SV=2	2362.1	2146.63	1829.31	1608.34	3037.66	2267.22	2210.31	2573.26
190	TRUE	Q8TDW0|LRC8C_HUMAN	0.12	26.53	19	17	Carbamidomethylation; Oxidation (M)	Volume-regulated anion channel subunit LRRC8C OS=Homo sapiens OX=9606 GN=LRRC8C PE=1 SV=2	17176.9	16345	6474.99	7084.9	10731	6207.18	8992.64	8919.73
680	TRUE	P62979|RS27A_HUMAN	5.86	25.64	4	4		Ubiquitin-40S ribosomal protein S27a OS=Homo sapiens OX=9606 GN=RPS27A PE=1 SV=2	105415	109307	52837.1	54504.1	141267	127436	82744.7	81721.5
716	TRUE	Q9NZN8|CNOT2_HUMAN	6.91	8.15	3	3		CCR4-NOT transcription complex subunit 2 OS=Homo sapiens OX=9606 GN=CNOT2 PE=1 SV=1	547.795	495.468	487.468	461.594	771.193	352.196	854.605	1019.17
1044	TRUE	Q15382|RHEB_HUMAN	6.09	20.11	3	3	Oxidation (M)	GTP-binding protein Rheb OS=Homo sapiens OX=9606 GN=RHEB PE=1 SV=1	4959.57	1964.97	3889.28	3745.51	712.238	1293.45	5772.81	500.471
528	TRUE	Q9UPT5|EXOC7_HUMAN	2.38	10.48	6	6	Oxidation (M)	Exocyst complex component 7 OS=Homo sapiens OX=9606 GN=EXOC7 PE=1 SV=3	664.275	548.569	1514.11	1596.41	799.243	527.995	1403.16	1106.6
1017	TRUE	O75096|LRP4_HUMAN	9.99	2.31	3	3		Low-density lipoprotein receptor-related protein 4 OS=Homo sapiens OX=9606 GN=LRP4 PE=1 SV=4	461.45	283.684	0	0	121.807	35.5107	49.4153	237.766
29	TRUE	P23229|ITA6_HUMAN	36.26	45.22	57	57	Acetylation (N-term); Carbamidomethylation; Oxidation (M)	Integrin alpha-6 OS=Homo sapiens OX=9606 GN=ITGA6 PE=1 SV=5	41904.3	39642.9	42547.5	42730.2	186301	203946	201408	173230
74	TRUE	P08069|IGF1R_HUMAN	1.04	24.87	29	25	Carbamidomethylation; Oxidation (M)	Insulin-like growth factor 1 receptor OS=Homo sapiens OX=9606 GN=IGF1R PE=1 SV=1	9331.96	11097.4	40278.2	41368.6	12449.7	54854.8	12212.2	11835.7
290	TRUE	Q86SQ0|PHLB2_HUMAN	6.73	11.73	11	11	Oxidation (M)	Pleckstrin homology-like domain family B member 2 OS=Homo sapiens OX=9606 GN=PHLDB2 PE=1 SV=2	581.635	2986.22	2988.76	2700.12	5563.2	5626.47	4914.73	791.918
207	TRUE	Q6P4Q7|CNNM4_HUMAN	11.93	26.58	18	16	Oxidation (M)	Metal transporter CNNM4 OS=Homo sapiens OX=9606 GN=CNNM4 PE=1 SV=3	8716.25	8313.23	5866.83	5617.37	12486.2	11022.6	14105.5	13116.6
1202	TRUE	Q96AC1|FERM2_HUMAN	2.6	3.68	2	2	Oxidation (M)	Fermitin family homolog 2 OS=Homo sapiens OX=9606 GN=FERMT2 PE=1 SV=1	361.361	425.142	192.118	158.563	253.978	166.65	97.5044	117.71
671	TRUE	Q13177|PAK2_HUMAN	3.03	9.54	5	5		Serine/threonine-protein kinase PAK 2 OS=Homo sapiens OX=9606 GN=PAK2 PE=1 SV=3	1049.08	741.111	387.631	157.989	296.028	218.367	372.351	104.42
941	TRUE	Q9UMX0|UBQL1_HUMAN	15.02	5.77	3	3		Ubiquilin-1 OS=Homo sapiens OX=9606 GN=UBQLN1 PE=1 SV=2	242.963	138.813	143.059	167.855	301.397	359.303	268.129	424.83
52	TRUE	Q5UIP0|RIF1_HUMAN	1.81	26.17	46	46	Oxidation (M)	Telomere-associated protein RIF1 OS=Homo sapiens OX=9606 GN=RIF1 PE=1 SV=2	9822.77	11564.2	2048.93	1898.5	5734.39	4587.32	4645.22	5405.42
499	TRUE	Q8N271|PROM2_HUMAN	28.05	5.16	4	4		Prominin-2 OS=Homo sapiens OX=9606 GN=PROM2 PE=1 SV=1	41.0594	35.2034	207.561	177.335	195.84	427.659	454.768	451.156
778	TRUE	P48029|SC6A8_HUMAN	1.3	7.87	4	4		Sodium- and chloride-dependent creatine transporter 1 OS=Homo sapiens OX=9606 GN=SLC6A8 PE=1 SV=1	1495.97	1051.49	2030.98	1856.92	1288.8	746.497	2200.56	1688.56
474	TRUE	Q9HD67|MYO10_HUMAN	7.94	4.03	6	6	Oxidation (M)	Unconventional myosin-X OS=Homo sapiens OX=9606 GN=MYO10 PE=1 SV=3	653.671	645.987	762.787	1024.95	210.304	867.547	370.884	325.196
883	TRUE	P61769|B2MG_HUMAN	15.52	35.29	3	3	Carbamidomethylation	Beta-2-microglobulin OS=Homo sapiens OX=9606 GN=B2M PE=1 SV=1	10267.8	10737.5	5835.04	6009.08	22697.6	15512.2	26038	27739.4
781	TRUE	Q96CX2|KCD12_HUMAN	9.07	10.46	3	3	Oxidation (M)	BTB/POZ domain-containing protein KCTD12 OS=Homo sapiens OX=9606 GN=KCTD12 PE=1 SV=1	556.308	545.058	1115.51	583.661	285.066	291.094	369.095	446.884
33	TRUE	P46940|IQGA1_HUMAN	3.93	42.91	55	53	Acetylation (N-term); Carbamidomethylation; Oxidation (M)	Ras GTPase-activating-like protein IQGAP1 OS=Homo sapiens OX=9606 GN=IQGAP1 PE=1 SV=1	16266.1	16922.9	11005.7	10213.5	15848.7	13364.3	14924.8	14604.3
705	TRUE	Q13546|RIPK1_HUMAN	4.43	6.41	3	3		Receptor-interacting serine/threonine-protein kinase 1 OS=Homo sapiens OX=9606 GN=RIPK1 PE=1 SV=3	211.979	266.974	1165.11	1212.27	450.543	2250.06	364.566	446.756
633	TRUE	P30511|HLAF_HUMAN	33.16	26.01	6	6		HLA class I histocompatibility antigen, alpha chain F OS=Homo sapiens OX=9606 GN=HLA-F PE=1 SV=3	559.851	793.427	1539.61	644.791	3656.4	3538.7	3351.82	2573.31
576	TRUE	Q8IXI1|MIRO2_HUMAN	0.43	15.86	7	6	Carbamidomethylation	Mitochondrial Rho GTPase 2 OS=Homo sapiens OX=9606 GN=RHOT2 PE=1 SV=2	5344.45	4826.06	1972.11	1896.96	2519.14	2043.15	2423	2306.65
327	TRUE	Q13425|SNTB2_HUMAN	5.21	27.22	13	13	Carbamidomethylation; Oxidation (M)	Beta-2-syntrophin OS=Homo sapiens OX=9606 GN=SNTB2 PE=1 SV=1	70810.5	2896.57	1527.16	3742.64	54224.1	3743.65	23693.3	20665.5
1238	TRUE	Q9Y6M0|TEST_HUMAN	15.63	7.64	2	2		Testisin OS=Homo sapiens OX=9606 GN=PRSS21 PE=1 SV=1	806.303	998.238	382.077	511.214	127.644	241.543	58.06	94.1445
87	TRUE	P05556|ITB1_HUMAN	4.06	23.56	23	23	Carbamidomethylation; Oxidation (M)	Integrin beta-1 OS=Homo sapiens OX=9606 GN=ITGB1 PE=1 SV=2	134729	126806	154563	158275	138339	154048	133664	112622
1209	TRUE	Q15904|VAS1_HUMAN	3.58	5.32	2	2		V-type proton ATPase subunit S1 OS=Homo sapiens OX=9606 GN=ATP6AP1 PE=1 SV=2	420.669	473.779	65.9532	70.0029	372.959	107.908	357.156	449.474
214	TRUE	P13797|PLST_HUMAN	1.2	27.46	13	13	Acetylation (N-term); Carbamidomethylation; Oxidation (M)	Plastin-3 OS=Homo sapiens OX=9606 GN=PLS3 PE=1 SV=4	3688.19	3583.54	1506.71	1427.15	2106.01	3063.92	1655.21	1950.19
920	TRUE	Q13107|UBP4_HUMAN	3	5.4	4	4	Oxidation (M)	Ubiquitin carboxyl-terminal hydrolase 4 OS=Homo sapiens OX=9606 GN=USP4 PE=1 SV=3	1017.12	826.612	298.344	354.262	321.454	325.158	290.422	241.774
667	TRUE	Q8NCG7|DGLB_HUMAN	1.47	11.76	6	6	Oxidation (M)	Diacylglycerol lipase-beta OS=Homo sapiens OX=9606 GN=DAGLB PE=1 SV=2	1682.98	1611.38	122.626	198.456	570.654	104.359	256.664	347.982
592	TRUE	Q8WWN8|ARAP3_HUMAN	2.97	5.96	7	7	Oxidation (M)	Arf-GAP with Rho-GAP domain, ANK repeat and PH domain-containing protein 3 OS=Homo sapiens OX=9606 GN=ARAP3 PE=1 SV=1	737.022	895.794	540.8	478.563	467.612	958.768	737.694	588.644
123	TRUE	O95573|ACSL3_HUMAN	5.16	41.11	25	22	Carbamidomethylation; Oxidation (M)	Long-chain-fatty-acid--CoA ligase 3 OS=Homo sapiens OX=9606 GN=ACSL3 PE=1 SV=3	10949.6	12009.2	8941.16	8725.68	10811.6	16841.5	9199.58	9769.34
806	TRUE	Q9NVD7|PARVA_HUMAN	5.03	9.95	4	3		Alpha-parvin OS=Homo sapiens OX=9606 GN=PARVA PE=1 SV=1	597.426	714.806	899.827	670.05	612.332	563.799	1186.05	878.31
697	TRUE	P63167|DYL1_HUMAN	0.52	49.44	4	4	Carbamidomethylation; Oxidation (M)	Dynein light chain 1, cytoplasmic OS=Homo sapiens OX=9606 GN=DYNLL1 PE=1 SV=1	65404.6	64145.5	20782.3	20370.7	39675.3	31559.6	27423.1	28003
822	TRUE	Q9H4B6|SAV1_HUMAN	0.46	11.75	3	3		Protein salvador homolog 1 OS=Homo sapiens OX=9606 GN=SAV1 PE=1 SV=2	1155.79	1200.78	174.138	147.332	315.328	305.79	334.798	276.439
695	TRUE	P60953|CDC42_HUMAN	3.3	31.41	6	6	Carbamidomethylation	Cell division control protein 42 homolog OS=Homo sapiens OX=9606 GN=CDC42 PE=1 SV=2	1772.38	2231	2218.76	2293.63	2146.23	1649.12	2306.42	2039.56
512	TRUE	Q13421|MSLN_HUMAN	37.15	11.9	8	8		Mesothelin OS=Homo sapiens OX=9606 GN=MSLN PE=1 SV=2	1649.46	1588.77	1600.35	1874.03	9238.2	8778.3	7692.77	7858.28
1022	TRUE	Q8IVF7|FMNL3_HUMAN	10.14	3.5	3	3		Formin-like protein 3 OS=Homo sapiens OX=9606 GN=FMNL3 PE=1 SV=3	448.54	337.997	328.648	186.529	423.009	671.804	522.789	505.612
1113	TRUE	Q53TN4|CYBR1_HUMAN	24.98	9.79	2	2		Cytochrome b reductase 1 OS=Homo sapiens OX=9606 GN=CYBRD1 PE=1 SV=1	321.712	509.565	1252.96	1142.51	849.631	1364.05	1473.96	1154.24
944	TRUE	P98196|AT11A_HUMAN	7.63	5.29	4	4		Probable phospholipid-transporting ATPase IH OS=Homo sapiens OX=9606 GN=ATP11A PE=1 SV=3	377.048	500.355	1286.23	498.962	583.675	369.591	7765.04	4517.2
741	TRUE	Q14165|MLEC_HUMAN	3.46	16.44	4	4		Malectin OS=Homo sapiens OX=9606 GN=MLEC PE=1 SV=1	2084.97	1868.04	1057.41	552.45	1298.17	1251.87	1724.28	1816.12
955	TRUE	P09429|HMGB1_HUMAN	2.55	12.09	2	2		High mobility group protein B1 OS=Homo sapiens OX=9606 GN=HMGB1 PE=1 SV=3	1996.79	2128.71	360.348	74.4907	1403.85	1151.86	1726.6	245.86
900	TRUE	Q12866|MERTK_HUMAN	7.12	2.5	3	2	Oxidation (M)	Tyrosine-protein kinase Mer OS=Homo sapiens OX=9606 GN=MERTK PE=1 SV=2	184.638	332.291	460.205	345.488	317.466	1310.83	155.72	1251.4
241	TRUE	Q86UE4|LYRIC_HUMAN	4.9	34.71	14	14	Oxidation (M)	Protein LYRIC OS=Homo sapiens OX=9606 GN=MTDH PE=1 SV=2	4263.07	4172.66	2099.61	2200.71	4490.97	2264.81	4975.14	5576.08
1250	TRUE	P24394|IL4RA_HUMAN	4.46	3.27	2	2		Interleukin-4 receptor subunit alpha OS=Homo sapiens OX=9606 GN=IL4R PE=1 SV=1	397.092	376.855	635.294	188.2	228.015	134.709	232.857	187.571
205	TRUE	Q9H2M9|RBGPR_HUMAN	5.66	14	15	15	Oxidation (M)	Rab3 GTPase-activating protein non-catalytic subunit OS=Homo sapiens OX=9606 GN=RAB3GAP2 PE=1 SV=1	1979.84	2412.43	555.153	1063.59	2771.7	2193.2	1419.94	2029.2
888	TRUE	Q658P3|STEA3_HUMAN	1.24	9.84	4	4		Metalloreductase STEAP3 OS=Homo sapiens OX=9606 GN=STEAP3 PE=1 SV=2	1642.75	1648.92	1295	791.559	755.438	698.84	1167.79	990.892
766	TRUE	O00220|TR10A_HUMAN	5.1	12.39	4	4	Oxidation (M)	Tumor necrosis factor receptor superfamily member 10A OS=Homo sapiens OX=9606 GN=TNFRSF10A PE=1 SV=3	3576.41	5006.49	1027.45	1209.81	1736.69	545.639	667.219	616.469
116	TRUE	P25705|ATPA_HUMAN	4.35	47.92	26	26	Carbamidomethylation; Oxidation (M)	ATP synthase subunit alpha, mitochondrial OS=Homo sapiens OX=9606 GN=ATP5F1A PE=1 SV=1	64660.2	64370.7	88493.9	88207	62951.8	59482.2	88414.6	87700.2
224	TRUE	Q9Y3Z3|SAMH1_HUMAN	20	33.71	16	16	Oxidation (M)	Deoxynucleoside triphosphate triphosphohydrolase SAMHD1 OS=Homo sapiens OX=9606 GN=SAMHD1 PE=1 SV=2	2027.78	1749.25	1466.7	1015.2	6562.63	3722.7	7175.1	7629.75
129	TRUE	P05141|ADT2_HUMAN	17.24	19.8	21	11	Carbamidomethylation; Oxidation (M)	ADP/ATP translocase 2 OS=Homo sapiens OX=9606 GN=SLC25A5 PE=1 SV=7	79204.4	77128.6	197833	194904	121605	178266	144247	92235.9
61	TRUE	P0DMV9|HS71B_HUMAN	4.82	27.3	30	14	Acetylation (N-term); Carbamidomethylation; Oxidation (M)	Heat shock 70 kDa protein 1B OS=Homo sapiens OX=9606 GN=HSPA1B PE=1 SV=1	26672.1	27549.8	13077.5	13146.7	31733.8	28938.1	18208.4	20494.3
345	TRUE	P28290|ITPI2_HUMAN	0.97	10.8	10	10	Oxidation (M)	Protein ITPRID2 OS=Homo sapiens OX=9606 GN=ITPRID2 PE=1 SV=3	3256.62	3381.67	976.272	2053.45	1387.91	1030.58	1791.94	1864.57
21	TRUE	P02751|FINC_HUMAN	15.76	17.92	30	30	Oxidation (M)	Fibronectin OS=Homo sapiens OX=9606 GN=FN1 PE=1 SV=5	9345.94	8438.92	3996.86	3920.82	1308.9	960.044	1228.61	1065.97
861	TRUE	Q9Y5L3|ENTP2_HUMAN	0.27	9.49	3	3	Oxidation (M)	Ectonucleoside triphosphate diphosphohydrolase 2 OS=Homo sapiens OX=9606 GN=ENTPD2 PE=1 SV=1	5826.81	5647.52	409.119	361.868	2119.66	224.963	1558.95	1751.26
176	TRUE	O94832|MYO1D_HUMAN	2.27	24.06	20	19	Oxidation (M)	Unconventional myosin-Id OS=Homo sapiens OX=9606 GN=MYO1D PE=1 SV=2	4260.82	4228.21	982.29	893.532	2771.95	2010.6	2427.57	2098.69
321	TRUE	Q13618|CUL3_HUMAN	8.31	15.49	10	10		Cullin-3 OS=Homo sapiens OX=9606 GN=CUL3 PE=1 SV=2	2432.88	2036.39	2416.94	1630.09	1061.22	1427.76	612.988	995.489
746	TRUE	Q5VZ89|DEN4C_HUMAN	0.07	1.62	3	3		DENN domain-containing protein 4C OS=Homo sapiens OX=9606 GN=DENND4C PE=1 SV=3	798.143	689.477	615.967	568.529	640.697	505.988	471.276	473.936
38	TRUE	P14923|PLAK_HUMAN	20.85	55.17	42	36	Acetylation (N-term); Carbamidomethylation; Oxidation (M)	Junction plakoglobin OS=Homo sapiens OX=9606 GN=JUP PE=1 SV=3	82194	64897.1	68255.2	68731.6	163341	158309	152542	151407
659	TRUE	Q01844|EWS_HUMAN	2.35	7.62	4	4	Oxidation (M)	RNA-binding protein EWS OS=Homo sapiens OX=9606 GN=EWSR1 PE=1 SV=1	28779.7	28395.2	13388.8	12529.6	14114.3	10056.3	9851.9	12294.7
654	TRUE	P20337|RAB3B_HUMAN	7.62	29.68	5	4	Oxidation (M)	Ras-related protein Rab-3B OS=Homo sapiens OX=9606 GN=RAB3B PE=1 SV=2	741.497	760.737	513.866	508.628	942.123	710.947	872.055	981.091
288	TRUE	P15311|EZRI_HUMAN	2.78	17.41	10	8	Oxidation (M)	Ezrin OS=Homo sapiens OX=9606 GN=EZR PE=1 SV=4	2865.23	1978.91	839.332	1138.99	2025.64	1369.69	2032.19	1509.77
331	TRUE	P05067|A4_HUMAN	24.98	15.32	9	9	Oxidation (M)	Amyloid-beta precursor protein OS=Homo sapiens OX=9606 GN=APP PE=1 SV=3	3389.14	4002.52	4147.97	3623.59	9630.15	9220.29	8938.87	8270.14
502	TRUE	Q9BW04|SARG_HUMAN	16.41	17.97	7	7		Specifically androgen-regulated gene protein OS=Homo sapiens OX=9606 GN=SARG PE=1 SV=2	1293	1473.52	384.934	618.878	3714.41	2803.99	4088.48	3877.47
164	TRUE	P11717|MPRI_HUMAN	17.44	12.24	23	23	Oxidation (M)	Cation-independent mannose-6-phosphate receptor OS=Homo sapiens OX=9606 GN=IGF2R PE=1 SV=3	1729.96	1665.39	1065.88	1330.43	4388.71	2586.24	6187.14	6593.7
222	TRUE	Q14118|DAG1_HUMAN	1.51	19.22	15	15	Oxidation (M)	Dystroglycan OS=Homo sapiens OX=9606 GN=DAG1 PE=1 SV=2	16095.2	15808.6	18342.9	16034.3	14329.4	13598.2	10567.7	9719.06
167	TRUE	P13010|XRCC5_HUMAN	3.05	41.8	18	18	Oxidation (M)	X-ray repair cross-complementing protein 5 OS=Homo sapiens OX=9606 GN=XRCC5 PE=1 SV=3	7223.76	7856.54	1427.63	1482.13	1738.86	1304.89	1214.57	2028.73
769	TRUE	Q9NPF4|OSGEP_HUMAN	4.44	22.39	5	5	Oxidation (M)	Probable tRNA N6-adenosine threonylcarbamoyltransferase OS=Homo sapiens OX=9606 GN=OSGEP PE=1 SV=1	1255.68	1319.55	948.793	874.31	1059.71	943.003	1407.74	1751.7
309	TRUE	Q15223|NECT1_HUMAN	6.13	32.11	11	11	Carbamidomethylation; Oxidation (M)	Nectin-1 OS=Homo sapiens OX=9606 GN=NECTIN1 PE=1 SV=3	23092.6	25530.5	12768.7	7710.55	25553	27450.3	20978.6	20635.4
514	TRUE	P20340|RAB6A_HUMAN	5.53	34.13	6	6	Acetylation (N-term); Oxidation (M)	Ras-related protein Rab-6A OS=Homo sapiens OX=9606 GN=RAB6A PE=1 SV=3	8546.99	7922.45	10872.2	11171	9665.21	6783.03	12109.7	15432.1
[truncated: 275 more rows]

## Sheet: Imputed Matrix
Protein Group	Top	Accession	Significance	Coverage (%)	#Peptides	#Unique	PTM	Description	Myc_Cells_2-2	Myc_Cells_2-1	Myc_Cells_1-2	Myc_Cells_1-1	EV_Cells_2-2	EV_Cells_2-1	EV_Cells_1-2	EV_Cells_1-1	Pvalue
[truncated: 969 more rows]

[truncated: 2 more sheets: Significance > 0.05, Z-score]
