# Supplementary material for: Cell-surface tethered promiscuous biotinylators enable comparative small-scale surface proteomic analysis of human extracellular vesicles and cells
Source: eLife journal article supplement (doi:10.7554/elife.73982), 2022-03-04
Supplement: supp [file elife-73982-supp-v1.zip › elife_poa_e73982_Figure_3_source_data_3.xlsx]

## Sheet: Sheet1
Myc Cell vs Control Cell
Upregulated in Control		Upregulated in Myc
Protein	Fold-change	Protein	Fold-change
BST2	0.0709327	ANPEP	123.964
HLA-B	0.0737632	CDH13	60.5258
BCAM	0.106288	VIM	46.8207
TGM1	0.113462	SLC38A5	22.8279
TMC4	0.224356	TNFRSF8	20.2073
IFITM3	0.232766	ROBO1	14.9905
UNC5B	0.161385	FLRT2	12.1001
EPHB3	0.183008	PTPRG	11.683
ITGB4	0.19291	CDH2	6.87504
MSLN	0.200101	CSPG4	6.70386
ATP2B4	0.205257	NT5E	6.50681
PCDHGB5	0.209602	RTN4RL1	6.17805
SMPDL3B	0.216835	TLR2	5.73816
FAT2	0.218291	PRSS21	5.52656
ITGA6	0.218476	FN1	5.23489
PROM2	0.235887	CA12	5.14781
PSAP	0.243615	JAG1	5.03799
HLA-F	0.250718	MCAM	4.02157
SDC4	0.252119	SLITRK6	3.9939
DSG3	0.253639	ANTXR2	3.77757
SDC1	0.25971	CTSB	3.54159
TSPAN14	0.263036	SLC19A1	3.35214
NEO1	0.274046	TENM3	3.19621
IGF2R	0.306477	FLRT3	3.17356
DSC2	0.325317	RTN4R	3.05767
PLXNB3	0.336288	GJA1	3.00665
MFGE8	0.339052	TMX3	2.98505
CD9	0.346349	HLA-C	2.73293
B2M	0.351129	SLC29A1	2.5215
PTPRS	0.352649	SCARB1	2.47109
LNPEP	0.359889	NAMPT	2.44033
NCSTN	0.381481	SLC31A1	2.30054
ALPP	0.388281	ALCAM	2.24867
SEMA4D	0.391582	ICAM1	2.10888
APP	0.419815	ITGA2	2.01283
STIM1	0.433358	SLC6A15	2.00923
ADAM10	0.434401
PCDH1	0.453045
CNNM2	0.456382
HLA-A	0.466662
TGFBI	0.470772
DSC3	0.483387
Figure 3–Source data 3. List of proteins comparing enriched targets (>2-fold) in Myc cells versus Control cells. Surface and secreted targets that were found enriched (Myc/Control) in the Control cells (left) and Myc cells (right). The fold-change between Myc cells and Control cells is listed in the column to the right of the gene name.
