# Supplementary material for: Cell-surface tethered promiscuous biotinylators enable comparative small-scale surface proteomic analysis of human extracellular vesicles and cells
Source: eLife journal article supplement (doi:10.7554/elife.73982), 2022-03-04
Supplement: supp [file elife-73982-supp-v1.zip › elife_poa_e73982_Figure_4_source_data_2.xlsx]

## Sheet: Appendix
Sample Origin	Sample Names	Sheet Titles	Description
Whole EV Lysate	Control EV 1	Raw Values	Area values produced from MaxQuant and log2(x) transformed in Perseus
	Control EV 2
	Myc EV 1
	Myc EV 2

## Sheet: Raw Values
Majority protein IDs	Control EV 1	Control EV 2	Myc EV 1	Myc EV 2	Intensity	MS/MS count	Protein IDs	Fasta	Uniprot
sp|P63261|ACTG_HUMAN	23.3325	23.3969	22.2099	22.1898	146520000	179	sp|P63261|ACTG_HUMAN	ACTG	P63261
sp|Q96FQ6|S10AG_HUMAN	23.1359	23.2362	23.127	22.9839	102500000	86	sp|Q96FQ6|S10AG_HUMAN	S10AG	Q96FQ6
sp|P08195|4F2_HUMAN	22.6741	22.6725	22.7448	22.7098	234580000	257	sp|P08195|4F2_HUMAN	4F2	P08195
sp|P62987|RL40_HUMAN;sp|P62979|RS27A_HUMAN;sp|P0CG47|UBB_HUMAN;sp|P0CG48|UBC_HUMAN	22.4331	22.4794	23.2995	23.0831	108280000	76	sp|P62987|RL40_HUMAN;sp|P62979|RS27A_HUMAN;sp|P0CG47|UBB_HUMAN;sp|P0CG48|UBC_HUMAN	RL40	P62987
sp|P0DP25|CALM3_HUMAN;sp|P0DP24|CALM2_HUMAN;sp|P0DP23|CALM1_HUMAN	22.3135	22.3057	19.5768	19.3856	37599000	77	sp|P0DP25|CALM3_HUMAN;sp|P0DP24|CALM2_HUMAN;sp|P0DP23|CALM1_HUMAN;sp|P02585|TNNC2_HUMAN	CALM3	P0DP25
sp|Q9HCY8|S10AE_HUMAN	22.2377	22.3334	21.7164	21.6928	61884000	53	sp|Q9HCY8|S10AE_HUMAN	S10AE	Q9HCY8
sp|P68133|ACTS_HUMAN;sp|P68032|ACTC_HUMAN;sp|P63267|ACTH_HUMAN;sp|P62736|ACTA_HUMAN	22.142	22.1722	20.6758	20.6318	20304000	20	sp|P68133|ACTS_HUMAN;sp|P68032|ACTC_HUMAN;sp|P63267|ACTH_HUMAN;sp|P62736|ACTA_HUMAN	ACTS	P68133
sp|P62879|GBB2_HUMAN	21.894	22.0633	21.1744	21.0061	37700000	87	sp|P62879|GBB2_HUMAN;sp|Q9BRK4|LZTS2_HUMAN	GBB2	P62879
sp|P35613|BASI_HUMAN	21.8512	22.1234	22.2691	22.2523	65858000	59	sp|P35613|BASI_HUMAN	BASI	P35613
sp|P21926|CD9_HUMAN	21.7865	21.9011	22.3852	22.1445	37302000	32	sp|P21926|CD9_HUMAN	CD9	P21926
sp|P63104|1433Z_HUMAN	21.7028	21.684	21.1234	20.9863	79411000	134	sp|P63104|1433Z_HUMAN;REV__sp|P53355|DAPK1_HUMAN	1433Z	P63104
sp|P13726|TF_HUMAN	21.6203	21.5611	21.3146	21.1613	33986000	40	sp|P13726|TF_HUMAN	TF	P13726
sp|P04899|GNAI2_HUMAN	21.5816	21.6823	20.5057	20.3628	30840000	112	sp|P04899|GNAI2_HUMAN	GNAI2	P04899
sp|P13987|CD59_HUMAN	21.1727	20.5517	21.3822	21.3742	11582000	9	sp|P13987|CD59_HUMAN	CD59	P13987
sp|P05556|ITB1_HUMAN	21.0477	21.1054	21.6126	21.4842	104780000	124	sp|P05556|ITB1_HUMAN	ITB1	P05556
sp|P29034|S10A2_HUMAN	21.0268	21.0005	20.1607	20.0003	8530500	11	sp|P29034|S10A2_HUMAN	S10A2	P29034
sp|Q9UBI6|GBG12_HUMAN	20.9983	21.1396	20.0563	19.8132	11959000	28	sp|Q9UBI6|GBG12_HUMAN;sp|P56962|STX17_HUMAN	GBG12	Q9UBI6
sp|Q99880|H2B1L_HUMAN;sp|Q99879|H2B1M_HUMAN;sp|Q99877|H2B1N_HUMAN;sp|Q93079|H2B1H_HUMAN;sp|Q5QNW6|H2B2F_HUMAN;sp|P62807|H2B1C_HUMAN;sp|P58876|H2B1D_HUMAN;sp|O60814|H2B1K_HUMAN;sp|P57053|H2BFS_HUMAN;sp|Q96A08|H2B1A_HUMAN	20.9409	20.8905	19.4501	19.606	11077000	37	sp|Q99880|H2B1L_HUMAN;sp|Q99879|H2B1M_HUMAN;sp|Q99877|H2B1N_HUMAN;sp|Q93079|H2B1H_HUMAN;sp|Q5QNW6|H2B2F_HUMAN;sp|P62807|H2B1C_HUMAN;sp|P58876|H2B1D_HUMAN;sp|O60814|H2B1K_HUMAN;sp|P57053|H2BFS_HUMAN;sp|Q96A08|H2B1A_HUMAN;sp|A0A2R8Y619|H2BE1_HUMAN	H2B1L	Q99880
sp|P07355|ANXA2_HUMAN;sp|A6NMY6|AXA2L_HUMAN	20.8786	20.8613	21.2521	21.2432	97072000	156	sp|P07355|ANXA2_HUMAN;sp|A6NMY6|AXA2L_HUMAN	ANXA2	P07355
sp|P31946|1433B_HUMAN	20.8658	20.9347	19.9292	19.6378	23172000	52	sp|P31946|1433B_HUMAN	1433B	P31946
sp|P62873|GBB1_HUMAN	20.7951	20.7006	18.6863	18.7165	8254700	21	sp|P62873|GBB1_HUMAN;sp|P16520|GBB3_HUMAN	GBB1	P62873
sp|P09758|TACD2_HUMAN	20.7828	21.0626	20.6539	20.5634	29805000	58	sp|P09758|TACD2_HUMAN;REV__sp|Q92917|GPKOW_HUMAN	TACD2	P09758
sp|P05023|AT1A1_HUMAN	20.7695	20.8337	21.588	21.6264	138950000	288	sp|P05023|AT1A1_HUMAN;sp|P20648|ATP4A_HUMAN	AT1A1	P05023
sp|P27701|CD82_HUMAN	20.7368	20.8398	19.6486	19.6197	13119000	35	sp|P27701|CD82_HUMAN	CD82	P27701
sp|O00560|SDCB1_HUMAN	20.683	20.7709	21.6739	21.5309	93490000	110	sp|O00560|SDCB1_HUMAN	SDCB1	O00560
sp|P06703|S10A6_HUMAN	20.6576	20.723	18.8153	18.9403	7462700	20	sp|P06703|S10A6_HUMAN	S10A6	P06703
sp|P54709|AT1B3_HUMAN	20.6241	20.6866	20.6098	20.5982	26791000	58	sp|P54709|AT1B3_HUMAN	AT1B3	P54709
sp|P27105|STOM_HUMAN	20.5867	20.4547	21.4592	21.3372	45535000	103	sp|P27105|STOM_HUMAN	STOM	P27105
sp|P04439|HLAA_HUMAN	20.5019	20.5185	20.732	20.6623	29707000	94	sp|P04439|HLAA_HUMAN	HLAA	P04439
sp|P31947|1433S_HUMAN	20.49	20.5504	19.4655	19.3564	35809000	93	sp|P31947|1433S_HUMAN	1433S	P31947
sp|P10599|THIO_HUMAN	20.391	21.0524	21.0391	21.055	13459000	18	sp|P10599|THIO_HUMAN	THIO	P10599
sp|Q9P2B2|FPRP_HUMAN	20.3604	20.4211	21.8738	21.7155	149250000	257	sp|Q9P2B2|FPRP_HUMAN	FPRP	Q9P2B2
sp|P60033|CD81_HUMAN	20.2148	20.5322	21.7708	21.7806	27883000	53	sp|P60033|CD81_HUMAN	CD81	P60033
sp|Q08380|LG3BP_HUMAN	20.1996	20.2261	19.1849	18.8924	24825000	84	sp|Q08380|LG3BP_HUMAN	LG3BP	Q08380
sp|P62258|1433E_HUMAN	20.1885	20.245	20.1726	20.1996	38968000	107	sp|P62258|1433E_HUMAN	1433E	P62258
sp|P62937|PPIA_HUMAN	20.1836	20.372	20.4863	20.1898	15763000	60	sp|P62937|PPIA_HUMAN;sp|Q9Y536|PAL4A_HUMAN;sp|P0DN26|PAL4F_HUMAN;sp|F5H284|PAL4D_HUMAN;sp|A0A0B4J2A2|PAL4C_HUMAN;sp|A0A075B767|PAL4H_HUMAN;sp|A0A075B759|PAL4E_HUMAN;sp|P0DN37|PAL4G_HUMAN;sp|O43447|PPIH_HUMAN;sp|P45877|PPIC_HUMAN	PPIA	P62937
sp|P23229|ITA6_HUMAN	20.1571	20.2339	21.0678	21.0918	71170000	236	sp|P23229|ITA6_HUMAN	ITA6	P23229
sp|Q08431|MFGM_HUMAN	20.1567	20.1875	19.6429	19.6221	27916000	87	sp|Q08431|MFGM_HUMAN	MFGM	Q08431
sp|Q01650|LAT1_HUMAN	20.1435	20.2385	20.5377	20.7788	18762000	32	sp|Q01650|LAT1_HUMAN;sp|Q9UM01|YLAT1_HUMAN	LAT1	Q01650
sp|P11142|HSP7C_HUMAN	20.1028	20.037	20.9413	20.9171	74417000	164	sp|P11142|HSP7C_HUMAN	HSP7C	P11142
sp|P02787|TRFE_HUMAN	20.1005	20.2071	19.3156	19.2902	29801000	99	sp|P02787|TRFE_HUMAN;CON__Q2HJF0	TRFE	P02787
sp|Q15758|AAAT_HUMAN	20.0231	20.102	21.1295	20.9897	23176000	69	sp|Q15758|AAAT_HUMAN	AAAT	Q15758
sp|P07737|PROF1_HUMAN	20.0204	19.9669	19.4306	19.3626	13477000	49	sp|P07737|PROF1_HUMAN	PROF1	P07737
sp|P60903|S10AA_HUMAN	19.9944	19.9984	20.7763	20.9128	8647900	8	sp|P60903|S10AA_HUMAN	S10AA	P60903
sp|P26006|ITA3_HUMAN	19.9906	19.8819	20.7856	20.86	54417000	156	sp|P26006|ITA3_HUMAN	ITA3	P26006
sp|P16422|EPCAM_HUMAN	19.9852	19.919	21.299	20.7569	21924000	51	sp|P16422|EPCAM_HUMAN	EPCAM	P16422
sp|P23528|COF1_HUMAN	19.9699	19.9776	19.1492	19.1693	12848000	51	sp|P23528|COF1_HUMAN	COF1	P23528
sp|P61224|RAP1B_HUMAN;sp|A6NIZ1|RP1BL_HUMAN	19.9699	20.0081	19.179	19.084	15269000	63	sp|P61224|RAP1B_HUMAN;sp|A6NIZ1|RP1BL_HUMAN	RAP1B	P61224
sp|P62805|H4_HUMAN	19.9659	19.9876	19.0317	19.247	12002000	27	sp|P62805|H4_HUMAN	H4	P62805
sp|P08754|GNAI3_HUMAN	19.9442	19.9306	18.3013	17.875	7336400	49	sp|P08754|GNAI3_HUMAN;sp|P19087|GNAT2_HUMAN;sp|P11488|GNAT1_HUMAN;sp|A8MTJ3|GNAT3_HUMAN	GNAI3	P08754
sp|P62820|RAB1A_HUMAN	19.9145	19.9096	19.3198	19.3102	10019000	58	sp|P62820|RAB1A_HUMAN	RAB1A	P62820
sp|P26038|MOES_HUMAN	19.8896	19.8696	19.4013	19.3571	24824000	149	sp|P26038|MOES_HUMAN	MOES	P26038
sp|P06733|ENOA_HUMAN	19.8107	19.825	19.9567	19.875	31873000	133	sp|P06733|ENOA_HUMAN	ENOA	P06733
sp|P04406|G3P_HUMAN	19.7411	19.867	19.8576	19.7738	18460000	85	sp|P04406|G3P_HUMAN	G3P	P04406
sp|P18564|ITB6_HUMAN	19.7379	19.5244	21.5159	21.5136	13168000	29	sp|P18564|ITB6_HUMAN	ITB6	P18564
sp|P31431|SDC4_HUMAN	19.691	19.6868	18.3848	18.4532	5941600	34	sp|P31431|SDC4_HUMAN	SDC4	P31431
sp|P01040|CYTA_HUMAN	19.6514	19.7506	17.9065	18.0687	5771800	23	sp|P01040|CYTA_HUMAN	CYTA	P01040
sp|Q15907|RB11B_HUMAN;sp|P62491|RB11A_HUMAN	19.5953	19.5853	18.7128	18.8252	11814000	49	sp|Q15907|RB11B_HUMAN;sp|P62491|RB11A_HUMAN	RB11B	Q15907
sp|P51149|RAB7A_HUMAN	19.5811	19.5392	18.8808	18.9171	18787000	76	sp|P51149|RAB7A_HUMAN;sp|Q2WGJ9|FR1L6_HUMAN;sp|Q9HC10|OTOF_HUMAN	RAB7A	P51149
sp|P16144|ITB4_HUMAN	19.5761	19.6236	20.7095	20.7075	89309000	290	sp|P16144|ITB4_HUMAN	ITB4	P16144
sp|P27348|1433T_HUMAN	19.5635	19.4352	18.8172	18.3386	9204000	40	sp|P27348|1433T_HUMAN	1433T	P27348
sp|P50395|GDIB_HUMAN	19.5622	19.6321	18.5561	18.6812	13964000	116	sp|P50395|GDIB_HUMAN	GDIB	P50395
sp|P04792|HSPB1_HUMAN	19.5067	19.4474	17.1388	17.2235	5547300	29	sp|P04792|HSPB1_HUMAN	HSPB1	P04792
sp|P13473|LAMP2_HUMAN	19.4869	19.7038	17.1681	17.2348	7489000	27	sp|P13473|LAMP2_HUMAN	LAMP2	P13473
sp|P60953|CDC42_HUMAN	19.4805	19.5664	18.4308	17.9681	12822000	57	sp|P60953|CDC42_HUMAN	CDC42	P60953
sp|P11234|RALB_HUMAN	19.4231	19.7086	19.089	18.9819	5669100	16	sp|P11234|RALB_HUMAN	RALB	P11234
sp|Q9Y624|JAM1_HUMAN	19.4051	19.4384	19.9628	19.6328	8986000	38	sp|Q9Y624|JAM1_HUMAN	JAM1	Q9Y624
sp|P61981|1433G_HUMAN	19.4	19.3044	19.0166	18.6075	7900100	36	sp|P61981|1433G_HUMAN	1433G	P61981
sp|P20340|RAB6A_HUMAN;sp|Q9NRW1|RAB6B_HUMAN	19.3672	19.2495	19.504	19.8558	4713300	24	sp|P20340|RAB6A_HUMAN;sp|Q9NRW1|RAB6B_HUMAN;sp|Q14964|RB39A_HUMAN	RAB6A	P20340
sp|P09211|GSTP1_HUMAN	19.3595	19.3255	18.9887	19.0068	11364000	63	sp|P09211|GSTP1_HUMAN	GSTP1	P09211
sp|P11233|RALA_HUMAN	19.3178	19.2453	18.822	18.923	12070000	51	sp|P11233|RALA_HUMAN	RALA	P11233
sp|Q5JWF2|GNAS1_HUMAN;sp|P63092|GNAS2_HUMAN	19.3017	19.3172	18.6822	18.8892	11714000	66	sp|Q5JWF2|GNAS1_HUMAN;sp|P63092|GNAS2_HUMAN;sp|P38405|GNAL_HUMAN	GNAS1	Q5JWF2
sp|P04075|ALDOA_HUMAN	19.2976	19.3296	19.1411	19.069	13793000	97	sp|P04075|ALDOA_HUMAN	ALDOA	P04075
sp|P08962|CD63_HUMAN	19.2763	19.3255	20.1089	19.7612	10677000	16	sp|P08962|CD63_HUMAN	CD63	P08962
sp|P15311|EZRI_HUMAN	19.2403	19.2299	17.9915	17.9372	14113000	96	sp|P15311|EZRI_HUMAN	EZRI	P15311
sp|P11279|LAMP1_HUMAN	19.1934	19.3909	17.9877	17.892	6011200	26	sp|P11279|LAMP1_HUMAN	LAMP1	P11279
sp|Q8IWA5|CTL2_HUMAN	19.1879	19.1998	19.298	19.1528	7579900	54	sp|Q8IWA5|CTL2_HUMAN	CTL2	Q8IWA5
sp|P29317|EPHA2_HUMAN	19.1869	19.2004	19.3841	19.479	20062000	116	sp|P29317|EPHA2_HUMAN	EPHA2	P29317
sp|P61769|B2MG_HUMAN	19.1802	19.3365	18.9871	19.0046	7357700	21	sp|P61769|B2MG_HUMAN	B2MG	P61769
sp|Q9P289|STK26_HUMAN	19.1771	19.0917	19.1617	19.4928	4941800	28	sp|Q9P289|STK26_HUMAN;sp|O00506|STK25_HUMAN	STK26	Q9P289
sp|P04083|ANXA1_HUMAN	19.1359	19.0588	18.3899	18.2084	12470000	78	sp|P04083|ANXA1_HUMAN	ANXA1	P04083
sp|Q16777|H2A2C_HUMAN;sp|Q6FI13|H2A2A_HUMAN;sp|Q99878|H2A1J_HUMAN;sp|Q96KK5|H2A1H_HUMAN;sp|Q9BTM1|H2AJ_HUMAN;sp|Q93077|H2A1C_HUMAN;sp|Q7L7L0|H2A3_HUMAN;sp|P20671|H2A1D_HUMAN;sp|P0C0S8|H2A1_HUMAN;sp|P04908|H2A1B_HUMAN	19.0685	19.0324	18.6012	18.2261	5026400	21	sp|Q16777|H2A2C_HUMAN;sp|Q6FI13|H2A2A_HUMAN;sp|Q99878|H2A1J_HUMAN;sp|Q96KK5|H2A1H_HUMAN;sp|Q9BTM1|H2AJ_HUMAN;sp|Q93077|H2A1C_HUMAN;sp|Q7L7L0|H2A3_HUMAN;sp|P20671|H2A1D_HUMAN;sp|P0C0S8|H2A1_HUMAN;sp|P04908|H2A1B_HUMAN	H2A2C	Q16777
sp|P61225|RAP2B_HUMAN	19.0339	19.0033	18.2364	18.2964	8724100	67	sp|P61225|RAP2B_HUMAN	RAP2B	P61225
sp|P84077|ARF1_HUMAN;sp|P61204|ARF3_HUMAN	19.0319	18.8647	18.487	18.1678	7546200	51	sp|P84077|ARF1_HUMAN;sp|P61204|ARF3_HUMAN	ARF1	P84077
sp|Q9Y639|NPTN_HUMAN	19.0116	19.2512	18.2369	18.2921	3176500	18	sp|Q9Y639|NPTN_HUMAN	NPTN	Q9Y639
sp|P14618|KPYM_HUMAN	18.9806	18.9528	18.9256	18.8197	16476000	112	sp|P14618|KPYM_HUMAN;sp|P30613|KPYR_HUMAN	KPYM	P14618
sp|Q9H223|EHD4_HUMAN	18.9513	18.8754	18.4219	18.5101	16415000	92	sp|Q9H223|EHD4_HUMAN	EHD4	Q9H223
sp|P51148|RAB5C_HUMAN	18.9296	18.846	18.4031	18.4775	9164500	50	sp|P51148|RAB5C_HUMAN	RAB5C	P51148
sp|P02790|HEMO_HUMAN	18.926	19.1078	20.0974	20.175	10689000	38	sp|P02790|HEMO_HUMAN	HEMO	P02790
sp|Q8N5I2|ARRD1_HUMAN	18.8768	18.8022	21.0993	21.1368	28305000	59	sp|Q8N5I2|ARRD1_HUMAN	ARRD1	Q8N5I2
sp|P63000|RAC1_HUMAN;sp|P60763|RAC3_HUMAN	18.8418	19.0597	19.2144	18.9119	5869200	28	sp|P63000|RAC1_HUMAN;sp|P60763|RAC3_HUMAN	RAC1	P63000
sp|Q8NFJ5|RAI3_HUMAN	18.8351	18.7844	18.6119	17.6949	4661100	23	sp|Q8NFJ5|RAI3_HUMAN	RAI3	Q8NFJ5
sp|P05026|AT1B1_HUMAN	18.8174	18.8237	19.6077	19.6781	10563000	31	sp|P05026|AT1B1_HUMAN	AT1B1	P05026
sp|O14672|ADA10_HUMAN	18.8138	18.7897	19.8204	19.7345	10873000	44	sp|O14672|ADA10_HUMAN	ADA10	O14672
sp|P53985|MOT1_HUMAN	18.7885	18.8667	19.8028	19.8863	14841000	56	sp|P53985|MOT1_HUMAN	MOT1	P53985
sp|P81605|DCD_HUMAN	18.7809	18.8258	16.3364	16.4343	2231500	8	sp|P81605|DCD_HUMAN	DCD	P81605
sp|Q9UK41|VPS28_HUMAN	18.7784	18.7129	20.3521	19.8877	12999000	58	sp|Q9UK41|VPS28_HUMAN	VPS28	Q9UK41
sp|Q06830|PRDX1_HUMAN	18.7567	19.0288	19.2131	19.2286	7880900	51	sp|Q06830|PRDX1_HUMAN	PRDX1	Q06830
sp|P31949|S10AB_HUMAN	18.754	18.7954	18.1022	18.1479	7519000	33	sp|P31949|S10AB_HUMAN	S10AB	P31949
sp|P01111|RASN_HUMAN	18.7359	18.8437	18.7012	18.8334	7556800	37	sp|P01111|RASN_HUMAN	RASN	P01111
sp|O15427|MOT4_HUMAN	18.6833	18.7398	19.6223	19.5784	14121000	37	sp|O15427|MOT4_HUMAN	MOT4	O15427
sp|P29966|MARCS_HUMAN	18.6735	18.826	18.5171	18.6619	11669000	64	sp|P29966|MARCS_HUMAN	MARCS	P29966
sp|O00299|CLIC1_HUMAN	18.6679	18.6178	17.9466	18.1083	4949300	31	sp|O00299|CLIC1_HUMAN	CLIC1	O00299
sp|Q9H9H4|VP37B_HUMAN	18.6561	18.7692	20.8059	20.1191	16068000	70	sp|Q9H9H4|VP37B_HUMAN	VP37B	Q9H9H4
sp|P16070|CD44_HUMAN	18.6309	18.6795	20.8944	20.8685	23433000	56	sp|P16070|CD44_HUMAN	CD44	P16070
sp|Q9H4M9|EHD1_HUMAN	18.6239	18.6293	18.1116	18.1952	14743000	125	sp|Q9H4M9|EHD1_HUMAN	EHD1	Q9H4M9
sp|Q969X1|LFG3_HUMAN	18.61	18.6527	18.2523	18.2778	2503600	12	sp|Q969X1|LFG3_HUMAN	LFG3	Q969X1
sp|P53990|IST1_HUMAN	18.6095	18.7251	19.0328	18.9895	8778900	47	sp|P53990|IST1_HUMAN	IST1	P53990
sp|Q8NG11|TSN14_HUMAN	18.6053	18.5997	19.2045	19.4216	6673400	27	sp|Q8NG11|TSN14_HUMAN	TSN14	Q8NG11
sp|Q15836|VAMP3_HUMAN	18.602	18.4893	18.3894	18.6273	3924400	29	sp|Q15836|VAMP3_HUMAN	VAMP3	Q15836
sp|P37802|TAGL2_HUMAN	18.5578	18.4344	17.5609	17.4471	4386800	39	sp|P37802|TAGL2_HUMAN;sp|Q9UI15|TAGL3_HUMAN	TAGL2	P37802
sp|P08238|HS90B_HUMAN	18.4889	18.4706	19.2162	19.2955	16055000	93	sp|P08238|HS90B_HUMAN;sp|Q58FF7|H90B3_HUMAN	HS90B	P08238
sp|P17301|ITA2_HUMAN	18.4385	18.4428	20.1417	20.1519	39511000	152	sp|P17301|ITA2_HUMAN	ITA2	P17301
sp|Q7Z5G4|GOGA7_HUMAN	18.4277	18.3939	18.0248	17.8854	4312900	26	sp|Q7Z5G4|GOGA7_HUMAN;sp|Q2TAP0|GOG7B_HUMAN	GOGA7	Q7Z5G4
sp|P63218|GBG5_HUMAN	18.3846	18.6919	17.4444	17.1376	1901900	12	sp|P63218|GBG5_HUMAN	GBG5	P63218
sp|P18669|PGAM1_HUMAN	18.3696	18.4165	18.0077	17.9346	5403300	57	sp|P18669|PGAM1_HUMAN;sp|P15259|PGAM2_HUMAN	PGAM1	P18669
sp|Q99808|S29A1_HUMAN	18.367	18.5429	20.1868	20.0605	9477200	37	sp|Q99808|S29A1_HUMAN	S29A1	Q99808
sp|P01889|HLAB_HUMAN	18.364	18.4179	16.4507	16.6327	2922200	30	sp|P01889|HLAB_HUMAN;sp|P13747|HLAE_HUMAN	HLAB	P01889
sp|Q9H444|CHM4B_HUMAN	18.3585	18.4391	18.5966	18.4057	5905100	38	sp|Q9H444|CHM4B_HUMAN;sp|P59074|CHM4P_HUMAN	CHM4B	Q9H444
sp|P12830|CADH1_HUMAN	18.3544	18.3627	17.8984	17.7042	4838000	42	sp|P12830|CADH1_HUMAN	CADH1	P12830
sp|P29992|GNA11_HUMAN	18.2884	18.2829	17.7018	17.8927	4971300	59	sp|P29992|GNA11_HUMAN;sp|O95837|GNA14_HUMAN;sp|P19086|GNAZ_HUMAN	GNA11	P29992
sp|O75340|PDCD6_HUMAN	18.2749	18.3426	18.8932	19.0856	6920900	35	sp|O75340|PDCD6_HUMAN	PDCD6	O75340
sp|O95297|MPZL1_HUMAN	18.2649	18.2926	19.0265	19.1229	8332000	31	sp|O95297|MPZL1_HUMAN	MPZL1	O95297
sp|P98172|EFNB1_HUMAN	18.2617	18.3153	19.7557	19.8874	7218600	23	sp|P98172|EFNB1_HUMAN	EFNB1	P98172
sp|P63096|GNAI1_HUMAN	18.2598	18.6504	17.2789	17.2355	2266500	33	sp|P63096|GNAI1_HUMAN	GNAI1	P63096
sp|Q8WUM4|PDC6I_HUMAN	18.2461	18.2071	20.4371	20.4613	58217000	183	sp|Q8WUM4|PDC6I_HUMAN	PDC6I	Q8WUM4
sp|Q96QD8|S38A2_HUMAN	18.2387	18.0647	18.6927	18.4723	4088200	32	sp|Q96QD8|S38A2_HUMAN	S38A2	Q96QD8
sp|P04080|CYTB_HUMAN	18.227	18.1881	17.7408	17.8421	2595500	24	sp|P04080|CYTB_HUMAN	CYTB	P04080
sp|P21589|5NTD_HUMAN	18.1813	18.2238	19.2235	19.112	19050000	97	sp|P21589|5NTD_HUMAN;REV__sp|Q9H2S1|KCNN2_HUMAN	5NTD	P21589
sp|Q99816|TS101_HUMAN	18.1808	18.1161	19.8857	19.9977	21792000	74	sp|Q99816|TS101_HUMAN	TS101	Q99816
sp|P27482|CALL3_HUMAN	18.1803	18.1919	15.3737	15.4893	2621300	32	sp|P27482|CALL3_HUMAN	CALL3	P27482
sp|O43707|ACTN4_HUMAN	18.1601	18.1091	17.1934	17.4569	4871700	104	sp|O43707|ACTN4_HUMAN;sp|Q08043|ACTN3_HUMAN;sp|Q9H254|SPTN4_HUMAN	ACTN4	O43707
sp|P00338|LDHA_HUMAN	18.1446	18.1459	17.9496	17.9119	8318400	62	sp|P00338|LDHA_HUMAN;sp|Q6ZMR3|LDH6A_HUMAN;sp|P07864|LDHC_HUMAN;sp|Q9BYZ2|LDH6B_HUMAN	LDHA	P00338
sp|O75954|TSN9_HUMAN	18.1438	18.2985	18.4387	18.5102	3205600	21	sp|O75954|TSN9_HUMAN	TSN9	O75954
sp|P12931|SRC_HUMAN	18.1074	18.1503	17.5869	17.6157	6381600	69	sp|P12931|SRC_HUMAN;sp|Q9H3Y6|SRMS_HUMAN;sp|P42685|FRK_HUMAN	SRC	P12931
sp|P61019|RAB2A_HUMAN	18.0982	18.1555	17.4462	17.6241	3991100	33	sp|P61019|RAB2A_HUMAN;sp|Q8WUD1|RAB2B_HUMAN	RAB2A	P61019
sp|O00161|SNP23_HUMAN	18.0356	17.854	18.3758	18.5512	4121100	41	sp|O00161|SNP23_HUMAN	SNP23	O00161
sp|Q15286|RAB35_HUMAN	18.0087	18.0279	17.9335	18.0222	3147300	29	sp|Q15286|RAB35_HUMAN;sp|Q15771|RAB30_HUMAN	RAB35	Q15286
sp|O75531|BAF_HUMAN	18.0065	18.0171	16.5472	11.721	987570	9	sp|O75531|BAF_HUMAN	BAF	O75531
sp|P07195|LDHB_HUMAN	17.9811	18.1076	18.909	18.9811	11358000	50	sp|P07195|LDHB_HUMAN	LDHB	P07195
sp|Q5VW32|BROX_HUMAN	17.9738	17.9039	19.0401	19.0413	5825300	44	sp|Q5VW32|BROX_HUMAN	BROX	Q5VW32
sp|P35221|CTNA1_HUMAN	17.9612	17.979	18.5963	18.6795	19533000	159	sp|P35221|CTNA1_HUMAN;sp|Q9UI47|CTNA3_HUMAN	CTNA1	P35221
sp|P0DMV9|HS71B_HUMAN;sp|P0DMV8|HS71A_HUMAN	17.9375	17.852	18.3792	18.4472	12619000	101	sp|P0DMV9|HS71B_HUMAN;sp|P0DMV8|HS71A_HUMAN	HS71B	P0DMV9
sp|P19256|LFA3_HUMAN	17.8943	17.7716	12.7723	12.494	1281500	8	sp|P19256|LFA3_HUMAN	LFA3	P19256
sp|P80723|BASP1_HUMAN	17.8739	17.8742	19.2719	19.1614	12382000	77	sp|P80723|BASP1_HUMAN	BASP1	P80723
sp|Q9P265|DIP2B_HUMAN	17.8594	17.9374	18.7593	18.7742	16297000	175	sp|Q9P265|DIP2B_HUMAN;sp|Q14689|DIP2A_HUMAN	DIP2B	Q9P265
sp|P62166|NCS1_HUMAN	17.8296	17.9193	17.5789	17.5873	4003700	38	sp|P62166|NCS1_HUMAN	NCS1	P62166
sp|P35241|RADI_HUMAN	17.8248	17.8109	15.8493	15.8059	4289700	74	sp|P35241|RADI_HUMAN	RADI	P35241
sp|P62330|ARF6_HUMAN	17.8157	17.6513	16.78	16.8226	1743700	18	sp|P62330|ARF6_HUMAN	ARF6	P62330
sp|Q9Y5Y6|ST14_HUMAN	17.81	17.8081	17.8673	18.041	6012500	49	sp|Q9Y5Y6|ST14_HUMAN	ST14	Q9Y5Y6
sp|P07108|ACBP_HUMAN	17.8029	18.0759	17.6514	17.642	2234200	13	sp|P07108|ACBP_HUMAN	ACBP	P07108
sp|P14923|PLAK_HUMAN	17.7942	17.8198	17.9339	17.9799	7301900	78	sp|P14923|PLAK_HUMAN	PLAK	P14923
sp|P18827|SDC1_HUMAN	17.7543	17.8082	18.6298	18.5434	2893900	23	sp|P18827|SDC1_HUMAN	SDC1	P18827
sp|P61586|RHOA_HUMAN	17.7537	18.078	17.7634	18.0531	3965500	33	sp|P61586|RHOA_HUMAN	RHOA	P61586
sp|P49006|MRP_HUMAN	17.7437	17.5935	18.2158	18.0961	2002800	16	sp|P49006|MRP_HUMAN	MRP	P49006
sp|Q99828|CIB1_HUMAN	17.7289	17.7899	16.435	16.3069	1899600	28	sp|Q99828|CIB1_HUMAN	CIB1	Q99828
sp|P22392|NDKB_HUMAN;sp|O60361|NDK8_HUMAN	17.7205	17.6477	18.1128	18.1052	3610300	45	sp|P22392|NDKB_HUMAN;sp|O60361|NDK8_HUMAN	NDKB	P22392
sp|Q04917|1433F_HUMAN	17.7035	17.6755	17.7393	17.4219	3137000	34	sp|Q04917|1433F_HUMAN	1433F	Q04917
sp|P23634|AT2B4_HUMAN	17.6983	17.5799	17.9517	17.9154	8380800	108	sp|P23634|AT2B4_HUMAN;sp|Q01814|AT2B2_HUMAN	AT2B4	P23634
sp|P05387|RLA2_HUMAN	17.6972	17.3915	16.7124	16.935	1666900	24	sp|P05387|RLA2_HUMAN	RLA2	P05387
sp|P08758|ANXA5_HUMAN	17.686	17.8093	17.6109	17.7654	2592300	37	sp|P08758|ANXA5_HUMAN	ANXA5	P08758
sp|P01112|RASH_HUMAN	17.6749	17.6239	17.4359	17.262	1322400	13	sp|P01112|RASH_HUMAN	RASH	P01112
sp|Q9UKS6|PACN3_HUMAN	17.6702	17.8316	17.2459	17.4986	5687100	63	sp|Q9UKS6|PACN3_HUMAN	PACN3	Q9UKS6
sp|Q8WWI5|CTL1_HUMAN	17.6624	17.5769	18.3388	18.172	5772700	52	sp|Q8WWI5|CTL1_HUMAN	CTL1	Q8WWI5
sp|Q9UQB8|BAIP2_HUMAN	17.6436	17.631	16.7085	16.7973	6413100	90	sp|Q9UQB8|BAIP2_HUMAN	BAIP2	Q9UQB8
sp|Q9BUL8|PDC10_HUMAN	17.6392	17.4467	17.3375	17.4699	2339500	27	sp|Q9BUL8|PDC10_HUMAN	PDC10	Q9BUL8
sp|P26232|CTNA2_HUMAN	17.5893	13.5461	17.2366	17.5245	1419300	9	sp|P26232|CTNA2_HUMAN	CTNA2	P26232
sp|P30086|PEBP1_HUMAN	17.5814	17.6306	16.9139	16.9194	3204200	43	sp|P30086|PEBP1_HUMAN	PEBP1	P30086
sp|P63098|CANB1_HUMAN	17.5778	17.5581	16.3955	16.3204	1883500	19	sp|P63098|CANB1_HUMAN;sp|Q96LZ3|CANB2_HUMAN	CANB1	P63098
sp|Q9NP79|VTA1_HUMAN	17.5646	17.3894	18.105	17.8989	2681600	22	sp|Q9NP79|VTA1_HUMAN	VTA1	Q9NP79
sp|Q8WTV0|SCRB1_HUMAN	17.5613	17.6845	20.3478	20.4719	13997000	37	sp|Q8WTV0|SCRB1_HUMAN	SCRB1	Q8WTV0
sp|P08648|ITA5_HUMAN	17.5587	17.4936	18.7165	18.6817	5072600	39	sp|P08648|ITA5_HUMAN	ITA5	P08648
sp|P50148|GNAQ_HUMAN	17.5486	17.556	16.3361	16.5085	1595800	25	sp|P50148|GNAQ_HUMAN	GNAQ	P50148
sp|P07339|CATD_HUMAN	17.5385	17.2722	13.3306	11.9052	1569400	23	sp|P07339|CATD_HUMAN	CATD	P07339
sp|P60981|DEST_HUMAN	17.5321	16.9559	16.9899	16.8839	1106400	13	sp|P60981|DEST_HUMAN	DEST	P60981
sp|Q6PCB8|EMB_HUMAN	17.5213	17.4307	17.9978	17.9042	2542400	25	sp|Q6PCB8|EMB_HUMAN	EMB	Q6PCB8
sp|P30044|PRDX5_HUMAN	17.5143	16.806	16.1663	16.5858	1031100	15	sp|P30044|PRDX5_HUMAN	PRDX5	P30044
sp|P36952|SPB5_HUMAN	17.5082	17.6183	18.699	18.689	10380000	70	sp|P36952|SPB5_HUMAN	SPB5	P36952
sp|P29692|EF1D_HUMAN	17.5014	17.5522	16.5028	16.6535	2817100	42	sp|P29692|EF1D_HUMAN	EF1D	P29692
sp|Q8WV92|MITD1_HUMAN	17.4801	17.3403	17.7659	17.8442	3493700	28	sp|Q8WV92|MITD1_HUMAN	MITD1	Q8WV92
sp|Q14019|COTL1_HUMAN	17.4673	17.2203	15.9637	16.1432	1343300	15	sp|Q14019|COTL1_HUMAN	COTL1	Q14019
sp|Q01469|FABP5_HUMAN	17.4636	17.5381	16.3871	16.4477	1615300	27	sp|Q01469|FABP5_HUMAN;sp|A8MUU1|FB5L3_HUMAN	FABP5	Q01469
sp|P05109|S10A8_HUMAN	17.4571	17.4593	11.9445	12.7836	706930	6	sp|P05109|S10A8_HUMAN	S10A8	P05109
sp|Q9NZN4|EHD2_HUMAN	17.4439	17.449	16.6979	16.7607	3478800	81	sp|Q9NZN4|EHD2_HUMAN	EHD2	Q9NZN4
sp|P00558|PGK1_HUMAN	17.4379	17.3632	17.9648	18.0961	4841800	47	sp|P00558|PGK1_HUMAN;sp|P07205|PGK2_HUMAN	PGK1	P00558
sp|Q9Y376|CAB39_HUMAN	17.4377	17.3202	16.4785	16.5488	2786200	50	sp|Q9Y376|CAB39_HUMAN;sp|Q9H9S4|CB39L_HUMAN	CAB39	Q9Y376
sp|Q00610|CLH1_HUMAN	17.4254	17.3419	17.3905	17.4708	10651000	170	sp|Q00610|CLH1_HUMAN;sp|P53675|CLH2_HUMAN	CLH1	Q00610
sp|P61088|UBE2N_HUMAN;sp|Q5JXB2|UE2NL_HUMAN	17.4228	17.4395	16.9809	16.9697	2302100	30	sp|P61088|UBE2N_HUMAN;sp|Q5JXB2|UE2NL_HUMAN	UBE2N	P61088
sp|Q13308|PTK7_HUMAN	17.3964	17.4725	17.663	17.7402	3446000	56	sp|Q13308|PTK7_HUMAN	PTK7	Q13308
sp|O75695|XRP2_HUMAN	17.3951	17.5511	18.2267	18.1722	1628600	12	sp|O75695|XRP2_HUMAN	XRP2	O75695
sp|P61026|RAB10_HUMAN	17.3949	17.4522	17.0331	17.2538	2303900	34	sp|P61026|RAB10_HUMAN;sp|P59190|RAB15_HUMAN	RAB10	P61026
sp|Q9H0U4|RAB1B_HUMAN	17.3937	17.5121	13.2101	13.2201	496950	10	sp|Q9H0U4|RAB1B_HUMAN;sp|Q92928|RAB1C_HUMAN	RAB1B	Q9H0U4
sp|Q03135|CAV1_HUMAN	17.3792	17.5074	18.9632	18.8068	4415500	26	sp|Q03135|CAV1_HUMAN;sp|P56539|CAV3_HUMAN	CAV1	Q03135
sp|P52907|CAZA1_HUMAN	17.3659	17.3362	16.9769	17.0042	2252700	36	sp|P52907|CAZA1_HUMAN	CAZA1	P52907
sp|P12814|ACTN1_HUMAN	17.3646	17.1439	16.6261	16.3685	1487400	38	sp|P12814|ACTN1_HUMAN;sp|P35609|ACTN2_HUMAN	ACTN1	P12814
sp|Q6YHK3|CD109_HUMAN	17.359	17.3854	18.3023	18.3058	11912000	130	sp|Q6YHK3|CD109_HUMAN;REV__sp|Q96M89|CC138_HUMAN	CD109	Q6YHK3
sp|P28066|PSA5_HUMAN	17.355	17.3835	16.9825	17.0809	1430100	21	sp|P28066|PSA5_HUMAN	PSA5	P28066
sp|Q96EY5|MB12A_HUMAN	17.3507	17.6453	19.5325	19.7583	6938100	38	sp|Q96EY5|MB12A_HUMAN	MB12A	Q96EY5
sp|P48509|CD151_HUMAN	17.3439	17.4246	18.5552	18.1848	4267100	16	sp|P48509|CD151_HUMAN	CD151	P48509
sp|P61077|UB2D3_HUMAN;sp|P62837|UB2D2_HUMAN	17.3341	17.2515	12.0493	13.8707	779180	7	sp|P61077|UB2D3_HUMAN;sp|P62837|UB2D2_HUMAN;sp|Q9Y2X8|UB2D4_HUMAN;sp|P51668|UB2D1_HUMAN	UB2D3	P61077
sp|Q13404|UB2V1_HUMAN	17.3237	17.3054	17.185	17.1965	2134200	20	sp|Q13404|UB2V1_HUMAN	UB2V1	Q13404
sp|O75051|PLXA2_HUMAN	17.3226	17.2547	17.5148	17.5716	9992800	149	sp|O75051|PLXA2_HUMAN	PLXA2	O75051
sp|Q5ZPR3|CD276_HUMAN	17.3167	17.2698	18.0902	17.9776	4273500	41	sp|Q5ZPR3|CD276_HUMAN	CD276	Q5ZPR3
sp|Q13740|CD166_HUMAN	17.313	17.342	18.9968	19.2449	6178200	46	sp|Q13740|CD166_HUMAN	CD166	Q13740
sp|P16949|STMN1_HUMAN	17.3128	17.3183	16.1636	16.2026	939940	12	sp|P16949|STMN1_HUMAN	STMN1	P16949
sp|O43633|CHM2A_HUMAN	17.275	17.2314	17.3823	17.328	2705200	31	sp|O43633|CHM2A_HUMAN	CHM2A	O43633
sp|P30041|PRDX6_HUMAN	17.2676	17.3662	16.4035	16.6229	2150700	35	sp|P30041|PRDX6_HUMAN	PRDX6	P30041
sp|P61604|CH10_HUMAN	17.2674	17.1447	16.7192	16.7425	1363400	14	sp|P61604|CH10_HUMAN	CH10	P61604
sp|Q92542|NICA_HUMAN	17.2506	17.1439	16.7001	16.6751	2746300	39	sp|Q92542|NICA_HUMAN	NICA	Q92542
sp|Q9BRA2|TXD17_HUMAN	17.2503	17.251	16.026	16.2072	871610	10	sp|Q9BRA2|TXD17_HUMAN	TXD17	Q9BRA2
sp|P62942|FKB1A_HUMAN	17.2426	17.2305	17.8513	17.8588	1989700	15	sp|P62942|FKB1A_HUMAN	FKB1A	P62942
sp|P60174|TPIS_HUMAN	17.2385	17.2285	18.2919	18.2344	5050100	60	sp|P60174|TPIS_HUMAN	TPIS	P60174
sp|O14818|PSA7_HUMAN;sp|Q8TAA3|PSMA8_HUMAN	17.231	17.2351	16.6666	16.6556	1989600	28	sp|O14818|PSA7_HUMAN;sp|Q8TAA3|PSMA8_HUMAN	PSA7	O14818
sp|P78417|GSTO1_HUMAN	17.2266	17.3533	16.2213	16.4513	1161000	21	sp|P78417|GSTO1_HUMAN	GSTO1	P78417
sp|Q9Y3L5|RAP2C_HUMAN	17.219	17.1471	16.1458	16.2593	1144800	22	sp|Q9Y3L5|RAP2C_HUMAN	RAP2C	Q9Y3L5
sp|P22626|ROA2_HUMAN	17.2181	17.0369	15.5389	15.0846	707080	13	sp|P22626|ROA2_HUMAN	ROA2	P22626
sp|Q92597|NDRG1_HUMAN	17.2066	17.1101	17.6357	17.532	2687500	37	sp|Q92597|NDRG1_HUMAN	NDRG1	Q92597
sp|Q99584|S10AD_HUMAN	17.2041	17.2774	16.7523	17.0177	2349000	20	sp|Q99584|S10AD_HUMAN	S10AD	Q99584
sp|P84095|RHOG_HUMAN	17.1979	17.4716	16.3247	16.194	1460400	24	sp|P84095|RHOG_HUMAN	RHOG	P84095
sp|Q99653|CHP1_HUMAN	17.1953	17.252	16.5877	16.9485	2243800	40	sp|Q99653|CHP1_HUMAN	CHP1	Q99653
sp|P06702|S10A9_HUMAN	17.1904	17.1966	11.9002	12.9516	600660	15	sp|P06702|S10A9_HUMAN	S10A9	P06702
sp|Q9NUP9|LIN7C_HUMAN	17.1792	16.9792	17.6491	17.7279	3620500	35	sp|Q9NUP9|LIN7C_HUMAN;sp|O14910|LIN7A_HUMAN;sp|Q9HAP6|LIN7B_HUMAN	LIN7C	Q9NUP9
sp|P67936|TPM4_HUMAN	17.1688	17.1123	15.9437	16.3301	1597200	27	sp|P67936|TPM4_HUMAN	TPM4	P67936
sp|P60660|MYL6_HUMAN	17.1667	17.2194	17.2344	17.491	1739400	23	sp|P60660|MYL6_HUMAN;sp|P14649|MYL6B_HUMAN	MYL6	P60660
sp|P06753|TPM3_HUMAN	17.1581	17.2159	14.8201	15.1766	530100	10	sp|P06753|TPM3_HUMAN	TPM3	P06753
sp|Q9H8S9|MOB1A_HUMAN;sp|Q7L9L4|MOB1B_HUMAN	17.1576	17.3798	17.3428	17.3742	2313000	21	sp|Q9H8S9|MOB1A_HUMAN;sp|Q7L9L4|MOB1B_HUMAN	MOB1A	Q9H8S9
sp|O14745|NHRF1_HUMAN	17.1419	17.1686	15.5098	15.5548	1179400	23	sp|O14745|NHRF1_HUMAN	NHRF1	O14745
sp|P40925|MDHC_HUMAN	17.1342	17.2466	16.7577	16.7684	1721500	21	sp|P40925|MDHC_HUMAN	MDHC	P40925
sp|O60716|CTND1_HUMAN	17.1316	17.2692	18.1011	18.1593	10387000	94	sp|O60716|CTND1_HUMAN	CTND1	O60716
sp|P30825|SL7A1_HUMAN	17.1273	17.2047	17.8884	17.5218	3648800	31	sp|P30825|SL7A1_HUMAN	SL7A1	P30825
sp|O75347|TBCA_HUMAN	17.104	17.1112	16.2898	16.3705	1273300	18	sp|O75347|TBCA_HUMAN	TBCA	O75347
sp|O60637|TSN3_HUMAN	17.0717	13.834	15.5354	15.679	539480	7	sp|O60637|TSN3_HUMAN	TSN3	O60637
sp|P02794|FRIH_HUMAN	17.0659	17.3269	15.9252	15.9066	1585000	34	sp|P02794|FRIH_HUMAN	FRIH	P02794
sp|P15531|NDKA_HUMAN	17.0654	17.1518	16.5097	16.5743	1244300	17	sp|P15531|NDKA_HUMAN	NDKA	P15531
sp|Q14624|ITIH4_HUMAN	17.0512	16.8249	18.7341	18.4878	5130900	28	sp|Q14624|ITIH4_HUMAN	ITIH4	Q14624
sp|Q16658|FSCN1_HUMAN	17.0416	17.1301	16.9911	16.6934	2730700	50	sp|Q16658|FSCN1_HUMAN	FSCN1	Q16658
sp|P61106|RAB14_HUMAN	17.0285	17.2944	17.2334	17.1392	2808000	36	sp|P61106|RAB14_HUMAN	RAB14	P61106
sp|P24534|EF1B_HUMAN	17.026	16.9971	16.6892	16.6288	1028800	9	sp|P24534|EF1B_HUMAN	EF1B	P24534
sp|Q9NUQ9|CYRIB_HUMAN	17.0218	17.1674	16.6164	16.8441	2748000	47	sp|Q9NUQ9|CYRIB_HUMAN;sp|Q9H0Q0|CYRIA_HUMAN	CYRIB	Q9NUQ9
sp|P23526|SAHH_HUMAN	17.009	16.9418	17.551	17.6915	3563800	46	sp|P23526|SAHH_HUMAN	SAHH	P23526
sp|P20618|PSB1_HUMAN	17.006	16.8836	16.4388	16.6023	1298400	26	sp|P20618|PSB1_HUMAN	PSB1	P20618
sp|P07900|HS90A_HUMAN	16.9859	16.9051	17.5996	17.4536	4470500	39	sp|P07900|HS90A_HUMAN;sp|Q14568|HS902_HUMAN;sp|Q58FF6|H90B4_HUMAN;sp|Q58FG0|HS905_HUMAN;sp|Q58FG1|HS904_HUMAN;sp|Q92538|GBF1_HUMAN	HS90A	P07900
sp|P11166|GTR1_HUMAN	16.9803	17.0632	19.6447	19.7406	7721300	27	sp|P11166|GTR1_HUMAN	GTR1	P11166
sp|P48029|SC6A8_HUMAN	16.9689	16.9886	17.8349	17.8251	3465400	25	sp|P48029|SC6A8_HUMAN;sp|Q9NSD5|S6A13_HUMAN;sp|P48065|S6A12_HUMAN;sp|P23975|SC6A2_HUMAN;sp|Q01959|SC6A3_HUMAN	SC6A8	P48029
sp|Q6P9B6|MEAK7_HUMAN	16.9466	16.9742	17.0452	16.967	2040700	35	sp|Q6P9B6|MEAK7_HUMAN	MEAK7	Q6P9B6
sp|Q9H0E2|TOLIP_HUMAN	16.9463	16.6296	16.9458	16.6854	1842700	31	sp|Q9H0E2|TOLIP_HUMAN	TOLIP	Q9H0E2
sp|Q01105|SET_HUMAN;sp|P0DME0|SETLP_HUMAN	16.944	16.3354	15.6602	15.7842	712160	16	sp|Q01105|SET_HUMAN;sp|P0DME0|SETLP_HUMAN	SET	Q01105
sp|Q5VTE0|EF1A3_HUMAN;sp|P68104|EF1A1_HUMAN	16.938	16.9324	18.3849	18.4315	10254000	74	sp|Q5VTE0|EF1A3_HUMAN;sp|P68104|EF1A1_HUMAN	EF1A3	Q5VTE0
sp|Q9H5V8|CDCP1_HUMAN	16.9203	17.0098	18.4965	18.612	6251900	50	sp|Q9H5V8|CDCP1_HUMAN	CDCP1	Q9H5V8
sp|P13693|TCTP_HUMAN;sp|Q56UQ5|TPT1L_HUMAN	16.9187	16.6163	17.2715	17.4857	1834100	25	sp|P13693|TCTP_HUMAN;sp|Q56UQ5|TPT1L_HUMAN	TCTP	P13693
sp|P06756|ITAV_HUMAN	16.9159	16.8765	18.5128	18.5708	11709000	105	sp|P06756|ITAV_HUMAN	ITAV	P06756
sp|P68371|TBB4B_HUMAN	16.8718	16.5128	18.2164	18.2545	4742600	41	sp|P68371|TBB4B_HUMAN	TBB4B	P68371
sp|P50995|ANX11_HUMAN	16.8692	16.8027	16.9376	16.7481	4118200	58	sp|P50995|ANX11_HUMAN	ANX11	P50995
sp|Q12959|DLG1_HUMAN	16.8628	16.843	17.1754	17.3801	4153000	62	sp|Q12959|DLG1_HUMAN;sp|Q15700|DLG2_HUMAN;sp|P78352|DLG4_HUMAN	DLG1	Q12959
sp|Q86X29|LSR_HUMAN	16.8605	16.7227	17.9194	17.984	5336600	42	sp|Q86X29|LSR_HUMAN	LSR	Q86X29
sp|Q9NZZ3|CHMP5_HUMAN	16.8561	16.8894	17.4476	17.3839	2140100	20	sp|Q9NZZ3|CHMP5_HUMAN	CHMP5	Q9NZZ3
sp|P17931|LEG3_HUMAN	16.8503	16.7288	16.7973	16.6065	2443300	32	sp|P17931|LEG3_HUMAN	LEG3	P17931
sp|P25787|PSA2_HUMAN	16.8478	16.851	16.3373	16.2098	1148800	27	sp|P25787|PSA2_HUMAN	PSA2	P25787
sp|O00159|MYO1C_HUMAN	16.8261	16.8839	17.0662	17.2983	3383300	70	sp|O00159|MYO1C_HUMAN	MYO1C	O00159
sp|Q9Y230|RUVB2_HUMAN	16.8159	16.7852	16.2948	16.3672	1475500	36	sp|Q9Y230|RUVB2_HUMAN	RUVB2	Q9Y230
sp|Q8NHG7|SVIP_HUMAN	16.7999	13.4993	17.0479	12.5149	506770	6	sp|Q8NHG7|SVIP_HUMAN	SVIP	Q8NHG7
sp|P54727|RD23B_HUMAN	16.7932	16.7253	16.5586	16.5073	1474700	26	sp|P54727|RD23B_HUMAN	RD23B	P54727
sp|Q15053|K0040_HUMAN	16.7826	16.718	16.0472	14.6517	525440	11	sp|Q15053|K0040_HUMAN	K0040	Q15053
sp|Q14108|SCRB2_HUMAN	16.7805	16.7713	15.9149	15.8099	1097100	19	sp|Q14108|SCRB2_HUMAN	SCRB2	Q14108
sp|A5D8V6|VP37C_HUMAN	16.7673	12.5965	18.4424	17.3876	1431900	16	sp|A5D8V6|VP37C_HUMAN	VP37C	A5D8V6
sp|P78310|CXAR_HUMAN	16.7673	16.797	16.4546	16.5978	1600600	24	sp|P78310|CXAR_HUMAN	CXAR	P78310
sp|P09497|CLCB_HUMAN	16.7614	17.1677	15.1658	15.2772	947460	20	sp|P09497|CLCB_HUMAN	CLCB	P09497
sp|Q9H190|SDCB2_HUMAN	16.7533	16.9895	17.6512	17.1155	1595900	20	sp|Q9H190|SDCB2_HUMAN	SDCB2	Q9H190
sp|Q8IZP0|ABI1_HUMAN	16.7478	16.65	16.0658	16.4177	1119400	19	sp|Q8IZP0|ABI1_HUMAN	ABI1	Q8IZP0
sp|Q9NY35|CLDN1_HUMAN	16.746	16.7941	16.7377	16.9475	1224000	14	sp|Q9NY35|CLDN1_HUMAN	CLDN1	Q9NY35
sp|Q13641|TPBG_HUMAN	16.7317	16.8874	18.1879	18.207	3345100	43	sp|Q13641|TPBG_HUMAN	TPBG	Q13641
sp|Q9NW97|TMM51_HUMAN	16.7239	16.7708	16.28	16.3066	1365400	23	sp|Q9NW97|TMM51_HUMAN	TMM51	Q9NW97
sp|P09972|ALDOC_HUMAN	16.7136	16.5098	16.3551	16.5209	988370	24	sp|P09972|ALDOC_HUMAN	ALDOC	P09972
sp|P61916|NPC2_HUMAN	16.7129	16.4637	11.3803	13.1287	234320	4	sp|P61916|NPC2_HUMAN	NPC2	P61916
sp|P10301|RRAS_HUMAN	16.6956	16.6693	16.3848	16.3561	780220	13	sp|P10301|RRAS_HUMAN	RRAS	P10301
sp|P25788|PSA3_HUMAN	16.6955	16.7279	16.5935	16.7448	1613300	23	sp|P25788|PSA3_HUMAN	PSA3	P25788
sp|O43795|MYO1B_HUMAN	16.6881	16.6648	16.2875	16.1341	3661200	74	sp|O43795|MYO1B_HUMAN;sp|Q8N1T3|MYO1H_HUMAN	MYO1B	O43795
sp|O15031|PLXB2_HUMAN	16.674	16.7101	17.1051	17.1959	4986300	120	sp|O15031|PLXB2_HUMAN;sp|O60486|PLXC1_HUMAN;REV__sp|Q5VW36|FOCAD_HUMAN;sp|Q9Y4D7|PLXD1_HUMAN	PLXB2	O15031
sp|P22061|PIMT_HUMAN	16.6683	16.1502	15.3901	15.7133	605490	18	sp|P22061|PIMT_HUMAN	PIMT	P22061
sp|Q9H299|SH3L3_HUMAN	16.6573	16.7906	12.5045	12.9676	475840	9	sp|Q9H299|SH3L3_HUMAN	SH3L3	Q9H299
sp|Q9H2H9|S38A1_HUMAN	16.6572	16.6888	18.4944	18.5652	2958000	15	sp|Q9H2H9|S38A1_HUMAN	S38A1	Q9H2H9
sp|Q8N271|PROM2_HUMAN	16.6552	16.7153	16.6181	16.7614	2950000	44	sp|Q8N271|PROM2_HUMAN	PROM2	Q8N271
sp|P11021|BIP_HUMAN	16.6531	16.6784	16.6648	16.7677	3787000	69	sp|P11021|BIP_HUMAN	BIP	P11021
sp|P52565|GDIR1_HUMAN	16.653	16.5796	17.0279	17.0346	1757700	21	sp|P52565|GDIR1_HUMAN	GDIR1	P52565
sp|P10586|PTPRF_HUMAN	16.6503	16.2881	18.0361	18.0922	4509400	54	sp|P10586|PTPRF_HUMAN;sp|P23468|PTPRD_HUMAN;sp|Q13332|PTPRS_HUMAN	PTPRF	P10586
sp|P61421|VA0D1_HUMAN	16.6495	16.7054	16.2467	16.3562	883650	14	sp|P61421|VA0D1_HUMAN	VA0D1	P61421
sp|P50151|GBG10_HUMAN	16.6444	16.8164	15.8588	16.3929	630680	11	sp|P50151|GBG10_HUMAN;sp|O95232|LC7L3_HUMAN;sp|P46019|KPB2_HUMAN	GBG10	P50151
sp|Q9HD42|CHM1A_HUMAN	16.6293	16.2673	16.0227	15.9818	529100	12	sp|Q9HD42|CHM1A_HUMAN	CHM1A	Q9HD42
sp|O75674|TM1L1_HUMAN	16.6206	16.66	17.2795	17.444	2199700	27	sp|O75674|TM1L1_HUMAN	TM1L1	O75674
sp|O43657|TSN6_HUMAN	16.6187	16.5414	17.2151	17.0097	870070	8	sp|O43657|TSN6_HUMAN	TSN6	O43657
sp|Q9BQE3|TBA1C_HUMAN;sp|P68363|TBA1B_HUMAN;sp|Q71U36|TBA1A_HUMAN;sp|P0DPH8|TBA3D_HUMAN;sp|P0DPH7|TBA3C_HUMAN;sp|Q6PEY2|TBA3E_HUMAN;sp|Q9NY65|TBA8_HUMAN	16.6161	16.598	18.0155	17.9753	4609200	44	sp|Q9BQE3|TBA1C_HUMAN;sp|P68363|TBA1B_HUMAN;sp|Q71U36|TBA1A_HUMAN;sp|P0DPH8|TBA3D_HUMAN;sp|P0DPH7|TBA3C_HUMAN;sp|Q6PEY2|TBA3E_HUMAN;sp|Q9NY65|TBA8_HUMAN;sp|Q9H853|TBA4B_HUMAN;sp|A6NHL2|TBAL3_HUMAN	TBA1C	Q9BQE3
sp|P30626|SORCN_HUMAN	16.6144	16.5531	16.4718	16.9504	1009000	14	sp|P30626|SORCN_HUMAN	SORCN	P30626
sp|P20645|MPRD_HUMAN	16.6137	16.3813	17.1925	16.8811	857560	11	sp|P20645|MPRD_HUMAN	MPRD	P20645
sp|Q01628|IFM3_HUMAN	16.5691	16.573	17.0096	17.2735	1351500	16	sp|Q01628|IFM3_HUMAN;sp|P13164|IFM1_HUMAN;sp|Q01629|IFM2_HUMAN;sp|C9JQL5|DSA2D_HUMAN	IFM3	Q01628
sp|Q8WUW1|BRK1_HUMAN	16.5625	16.589	16.0347	16.2689	615920	18	sp|Q8WUW1|BRK1_HUMAN	BRK1	Q8WUW1
sp|Q15642|CIP4_HUMAN	16.5547	16.4994	14.5494	14.7956	1176900	35	sp|Q15642|CIP4_HUMAN	CIP4	Q15642
sp|P35222|CTNB1_HUMAN	16.5511	16.2112	18.1205	18.1124	5511100	76	sp|P35222|CTNB1_HUMAN	CTNB1	P35222
sp|P09543|CN37_HUMAN	16.5482	16.4872	16.2241	16.2514	2126600	41	sp|P09543|CN37_HUMAN	CN37	P09543
sp|O95819|M4K4_HUMAN	16.525	16.5533	17.3869	17.3112	3734200	65	sp|O95819|M4K4_HUMAN	M4K4	O95819
sp|P62834|RAP1A_HUMAN	16.5242	16.3978	12.5644	12.457	1318300	10	sp|P62834|RAP1A_HUMAN	RAP1A	P62834
sp|Q96TA1|NIBA2_HUMAN	16.5223	16.4877	16.7966	16.7121	2735900	59	sp|Q96TA1|NIBA2_HUMAN	NIBA2	Q96TA1
sp|P32119|PRDX2_HUMAN	16.5185	16.5796	16.0118	15.7522	785080	17	sp|P32119|PRDX2_HUMAN	PRDX2	P32119
sp|P60900|PSA6_HUMAN	16.514	16.5382	16.4458	16.6025	1732900	29	sp|P60900|PSA6_HUMAN	PSA6	P60900
sp|P13928|ANXA8_HUMAN	16.5121	16.4779	15.7768	15.9955	1406700	28	sp|P13928|ANXA8_HUMAN	ANXA8	P13928
sp|Q14847|LASP1_HUMAN	16.4959	16.2133	15.8239	16.3088	508060	13	sp|Q14847|LASP1_HUMAN	LASP1	Q14847
sp|Q08209|PP2BA_HUMAN;sp|P16298|PP2BB_HUMAN	16.4639	16.4964	16.5232	16.5033	1409500	26	sp|Q08209|PP2BA_HUMAN;sp|P16298|PP2BB_HUMAN;sp|P48454|PP2BC_HUMAN	PP2BA	Q08209
sp|P21796|VDAC1_HUMAN	16.4612	16.0301	14.5851	14.6148	754450	24	sp|P21796|VDAC1_HUMAN	VDAC1	P21796
sp|A6NCE7|MP3B2_HUMAN;sp|Q9GZQ8|MLP3B_HUMAN;sp|Q9H492|MLP3A_HUMAN	16.459	16.4907	11.9904	12.4344	383880	6	sp|A6NCE7|MP3B2_HUMAN;sp|Q9GZQ8|MLP3B_HUMAN;sp|Q9H492|MLP3A_HUMAN	MP3B2	A6NCE7
sp|P06744|G6PI_HUMAN	16.4506	16.2156	16.3045	16.1823	1592900	45	sp|P06744|G6PI_HUMAN;sp|Q8N196|SIX5_HUMAN	G6PI	P06744
sp|P31689|DNJA1_HUMAN	16.4501	16.3192	17.2094	17.328	1761200	25	sp|P31689|DNJA1_HUMAN	DNJA1	P31689
sp|Q14344|GNA13_HUMAN	16.4438	16.4343	15.7851	15.8299	1498200	35	sp|Q14344|GNA13_HUMAN	GNA13	Q14344
sp|P15529|MCP_HUMAN	16.4383	16.5567	17.9945	18.1462	1633600	11	sp|P15529|MCP_HUMAN	MCP	P15529
sp|P63241|IF5A1_HUMAN	16.436	17.2049	16.6971	16.2607	1444600	18	sp|P63241|IF5A1_HUMAN;sp|Q6IS14|IF5AL_HUMAN;sp|Q9GZV4|IF5A2_HUMAN	IF5A1	P63241
sp|P07686|HEXB_HUMAN	16.4298	16.3687	12.3194	13.716	634120	13	sp|P07686|HEXB_HUMAN	HEXB	P07686
sp|Q15847|ADIRF_HUMAN	16.4237	16.6375	12.2933	12.7735	280350	4	sp|Q15847|ADIRF_HUMAN	ADIRF	Q15847
sp|P00441|SODC_HUMAN	16.4206	16.2865	16.9914	17.2328	823380	13	sp|P00441|SODC_HUMAN	SODC	P00441
sp|Q13765|NACA_HUMAN;sp|E9PAV3|NACAM_HUMAN	16.4195	16.6413	15.7529	16.0184	686480	13	sp|Q13765|NACA_HUMAN;sp|E9PAV3|NACAM_HUMAN	NACA	Q13765
sp|O43399|TPD54_HUMAN	16.4096	16.4395	15.8178	15.9122	1147400	29	sp|O43399|TPD54_HUMAN	TPD54	O43399
sp|Q9UMD9|COHA1_HUMAN	16.4085	16.555	17.8376	17.7178	2579800	26	sp|Q9UMD9|COHA1_HUMAN	COHA1	Q9UMD9
sp|O75351|VPS4B_HUMAN	16.4072	16.5164	17.5207	17.8765	2721500	38	sp|O75351|VPS4B_HUMAN;sp|Q6PIW4|FIGL1_HUMAN	VPS4B	O75351
sp|P13639|EF2_HUMAN	16.3966	16.1599	17.17	17.1729	4007100	71	sp|P13639|EF2_HUMAN;sp|Q15029|U5S1_HUMAN	EF2	P13639
sp|P02654|APOC1_HUMAN	16.3956	16.4599	16.2035	16.1956	504840	8	sp|P02654|APOC1_HUMAN	APOC1	P02654
sp|P29323|EPHB2_HUMAN	16.3859	16.4435	17.9869	18.0876	3318500	36	sp|P29323|EPHB2_HUMAN;sp|Q15375|EPHA7_HUMAN	EPHB2	P29323
sp|Q9NRX5|SERC1_HUMAN	16.3757	13.5732	15.7724	16.1026	456680	9	sp|Q9NRX5|SERC1_HUMAN	SERC1	Q9NRX5
sp|Q10589|BST2_HUMAN	16.3729	16.2984	14.5539	14.5768	538390	12	sp|Q10589|BST2_HUMAN	BST2	Q10589
sp|O00186|STXB3_HUMAN	16.3711	16.2319	16.2273	16.3082	1689000	45	sp|O00186|STXB3_HUMAN	STXB3	O00186
sp|Q13492|PICAL_HUMAN	16.3711	16.0535	12.1419	11.4844	1031300	34	sp|Q13492|PICAL_HUMAN;sp|O60641|AP180_HUMAN	PICAL	Q13492
sp|P50990|TCPQ_HUMAN	16.3642	16.2633	16.3644	16.4883	1934800	41	sp|P50990|TCPQ_HUMAN	TCPQ	P50990
sp|P49773|HINT1_HUMAN	16.3627	16.4478	16.5973	15.6624	699260	13	sp|P49773|HINT1_HUMAN	HINT1	P49773
sp|P00533|EGFR_HUMAN	16.3612	16.16	17.2718	17.168	4363000	67	sp|P00533|EGFR_HUMAN;sp|P04626|ERBB2_HUMAN;sp|Q15303|ERBB4_HUMAN	EGFR	P00533
sp|P12277|KCRB_HUMAN	16.3532	16.3909	16.5404	16.3786	960570	24	sp|P12277|KCRB_HUMAN;sp|P06732|KCRM_HUMAN	KCRB	P12277
sp|P47756|CAPZB_HUMAN	16.3531	16.2901	12.6088	12.5505	332200	10	sp|P47756|CAPZB_HUMAN	CAPZB	P47756
sp|P07602|SAP_HUMAN	16.3471	16.3036	12.949	12.7388	320750	6	sp|P07602|SAP_HUMAN	SAP	P07602
sp|Q9UKK9|NUDT5_HUMAN	16.339	16.3355	15.793	15.851	1396400	31	sp|Q9UKK9|NUDT5_HUMAN	NUDT5	Q9UKK9
sp|P21579|SYT1_HUMAN	16.338	16.4037	17.0287	17.0679	1359900	22	sp|P21579|SYT1_HUMAN;sp|Q8N9I0|SYT2_HUMAN	SYT1	P21579
sp|Q9UL26|RB22A_HUMAN	16.3373	16.4638	16.0593	15.9955	697180	22	sp|Q9UL26|RB22A_HUMAN	RB22A	Q9UL26
sp|Q9C0B5|ZDHC5_HUMAN	16.3356	16.8688	17.7943	17.7863	3187200	36	sp|Q9C0B5|ZDHC5_HUMAN	ZDHC5	Q9C0B5
sp|Q99497|PARK7_HUMAN	16.316	16.4935	17.3576	17.0145	1566700	25	sp|Q99497|PARK7_HUMAN	PARK7	Q99497
sp|P62079|TSN5_HUMAN	16.3066	16.665	18.6559	18.7463	2365400	17	sp|P62079|TSN5_HUMAN	TSN5	P62079
sp|Q9NUN5|LMBD1_HUMAN	16.2937	16.1062	13.524	14.0181	282250	7	sp|Q9NUN5|LMBD1_HUMAN	LMBD1	Q9NUN5
sp|Q9UNF0|PACN2_HUMAN	16.2854	16.2429	15.9595	16.243	1987400	42	sp|Q9UNF0|PACN2_HUMAN	PACN2	Q9UNF0
sp|Q01995|TAGL_HUMAN	16.2836	16.587	15.7179	15.6093	911080	20	sp|Q01995|TAGL_HUMAN	TAGL	Q01995
sp|P45880|VDAC2_HUMAN	16.282	16.5018	14.5736	13.7386	404270	9	sp|P45880|VDAC2_HUMAN	VDAC2	P45880
sp|P07437|TBB5_HUMAN	16.274	15.3921	17.2276	17.1438	1248400	17	sp|P07437|TBB5_HUMAN;sp|A6NNZ2|TBB8B_HUMAN;sp|Q9H4B7|TBB1_HUMAN;CON__ENSEMBL:ENSBTAP00000025008	TBB5	P07437
sp|P22735|TGM1_HUMAN	16.2693	16.3129	11.2253	11.6768	1008000	35	sp|P22735|TGM1_HUMAN	TGM1	P22735
sp|P05362|ICAM1_HUMAN	16.2577	16.2473	16.0639	16.2603	1552100	26	sp|P05362|ICAM1_HUMAN	ICAM1	P05362
sp|P63027|VAMP2_HUMAN	16.2576	16.0183	16.624	16.7806	1007200	12	sp|P63027|VAMP2_HUMAN;sp|P23763|VAMP1_HUMAN	VAMP2	P63027
sp|Q04760|LGUL_HUMAN	16.2532	15.8485	15.4074	15.6782	805770	21	sp|Q04760|LGUL_HUMAN	LGUL	Q04760
sp|O60487|MPZL2_HUMAN	16.2456	16.6003	17.329	17.3369	1519400	16	sp|O60487|MPZL2_HUMAN	MPZL2	O60487
sp|Q9UIW2|PLXA1_HUMAN	16.2415	16.2932	17.0594	17.3191	3077600	61	sp|Q9UIW2|PLXA1_HUMAN;sp|P51805|PLXA3_HUMAN	PLXA1	Q9UIW2
sp|Q14254|FLOT2_HUMAN	16.2267	15.8848	15.1626	15.4129	989270	39	sp|Q14254|FLOT2_HUMAN	FLOT2	Q14254
sp|P28070|PSB4_HUMAN	16.2245	16.571	15.9942	16.0835	975600	20	sp|P28070|PSB4_HUMAN	PSB4	P28070
sp|P14324|FPPS_HUMAN	16.21	16.2109	15.8644	16.0706	881760	16	sp|P14324|FPPS_HUMAN	FPPS	P14324
sp|P51153|RAB13_HUMAN	16.2009	16.1441	15.9122	15.9781	932130	24	sp|P51153|RAB13_HUMAN	RAB13	P51153
sp|Q53EZ4|CEP55_HUMAN	16.1935	16.0486	14.8115	14.8262	625290	23	sp|Q53EZ4|CEP55_HUMAN	CEP55	Q53EZ4
sp|P09525|ANXA4_HUMAN	16.1918	16.26	16.115	15.9642	1661700	44	sp|P09525|ANXA4_HUMAN	ANXA4	P09525
sp|P55209|NP1L1_HUMAN	16.168	16.4446	15.7604	15.8088	722970	19	sp|P55209|NP1L1_HUMAN	NP1L1	P55209
sp|P13797|PLST_HUMAN	16.1672	16.1992	14.4797	14.8224	1017800	31	sp|P13797|PLST_HUMAN;sp|P13796|PLSL_HUMAN;sp|Q14651|PLSI_HUMAN	PLST	P13797
sp|Q16625|OCLN_HUMAN	16.1624	16.025	16.7644	16.7702	1503200	27	sp|Q16625|OCLN_HUMAN	OCLN	Q16625
sp|Q32P51|RA1L2_HUMAN;sp|P09651|ROA1_HUMAN	16.1442	16.166	12.1814	13.894	389960	14	sp|Q32P51|RA1L2_HUMAN;sp|P09651|ROA1_HUMAN	RA1L2	Q32P51
sp|P62993|GRB2_HUMAN	16.1415	16.1546	16.2519	16.4425	1278700	28	sp|P62993|GRB2_HUMAN	GRB2	P62993
sp|Q93096|TP4A1_HUMAN	16.1343	15.9989	15.9657	16.1412	747610	17	sp|Q93096|TP4A1_HUMAN	TP4A1	Q93096
sp|P62140|PP1B_HUMAN	16.1174	15.7105	15.6608	15.585	477940	15	sp|P62140|PP1B_HUMAN	PP1B	P62140
sp|P60520|GBRL2_HUMAN	16.1059	16.117	12.0839	12.6306	382300	9	sp|P60520|GBRL2_HUMAN	GBRL2	P60520
sp|Q01518|CAP1_HUMAN	16.0756	16.0541	15.3066	15.5461	799160	35	sp|Q01518|CAP1_HUMAN;sp|P40123|CAP2_HUMAN	CAP1	Q01518
sp|Q12846|STX4_HUMAN	16.0641	16.0576	16.372	16.4407	1915000	37	sp|Q12846|STX4_HUMAN;sp|Q8IYE1|CCD13_HUMAN	STX4	Q12846
sp|Q9UBV8|PEF1_HUMAN	16.0499	15.92	15.3326	15.203	825840	21	sp|Q9UBV8|PEF1_HUMAN	PEF1	Q9UBV8
sp|Q7LBR1|CHM1B_HUMAN	16.0478	16.0283	17.2149	17.1751	1923500	22	sp|Q7LBR1|CHM1B_HUMAN	CHM1B	Q7LBR1
sp|P54920|SNAA_HUMAN	16.0417	16.0206	16.1689	16.3489	1589700	38	sp|P54920|SNAA_HUMAN;sp|Q9H115|SNAB_HUMAN	SNAA	P54920
sp|Q9NZT1|CALL5_HUMAN	16.0406	16.0777	13.1808	12.7223	284550	9	sp|Q9NZT1|CALL5_HUMAN	CALL5	Q9NZT1
sp|Q86VE9|SERC5_HUMAN	16.0389	15.7713	18.0065	17.5946	1599900	18	sp|Q86VE9|SERC5_HUMAN	SERC5	Q86VE9
sp|P22234|PUR6_HUMAN	16.0384	16.0419	15.7254	15.4411	677560	23	sp|P22234|PUR6_HUMAN	PUR6	P22234
sp|P48960|AGRE5_HUMAN	16.0321	16.0295	17.5477	17.5919	1457500	23	sp|P48960|AGRE5_HUMAN	AGRE5	P48960
sp|Q9UL25|RAB21_HUMAN	16.0119	16.2568	15.7135	15.9287	690870	23	sp|Q9UL25|RAB21_HUMAN	RAB21	Q9UL25
sp|P01116|RASK_HUMAN	16.0065	15.7422	16.9152	17.047	1200300	14	sp|P01116|RASK_HUMAN	RASK	P01116
sp|Q9BTU6|P4K2A_HUMAN	15.9986	16.0877	14.5983	14.4067	589410	20	sp|Q9BTU6|P4K2A_HUMAN	P4K2A	Q9BTU6
sp|O14908|GIPC1_HUMAN	15.982	16.3164	17.0857	17.1534	1600300	25	sp|O14908|GIPC1_HUMAN;sp|Q8TF64|GIPC3_HUMAN	GIPC1	O14908
sp|Q13433|S39A6_HUMAN	15.9741	16.1335	17.7565	17.6889	1401200	17	sp|Q13433|S39A6_HUMAN	S39A6	Q13433
sp|P18084|ITB5_HUMAN	15.9672	15.9952	15.6729	15.9801	832790	17	sp|P18084|ITB5_HUMAN	ITB5	P18084
sp|P62070|RRAS2_HUMAN	15.9635	15.7977	16.8047	16.8982	1792900	29	sp|P62070|RRAS2_HUMAN	RRAS2	P62070
sp|P31944|CASPE_HUMAN	15.9632	15.1981	11.7917	14.3537	236500	7	sp|P31944|CASPE_HUMAN	CASPE	P31944
sp|Q9NP97|DLRB1_HUMAN;sp|Q8TF09|DLRB2_HUMAN	15.9595	16.1154	13.3226	14.6972	238810	7	sp|Q9NP97|DLRB1_HUMAN;sp|Q8TF09|DLRB2_HUMAN	DLRB1	Q9NP97
sp|O15118|NPC1_HUMAN	15.9546	15.4588	15.5078	15.3403	555250	15	sp|O15118|NPC1_HUMAN	NPC1	O15118
sp|P00491|PNPH_HUMAN	15.9528	15.8867	15.9455	16.0817	1133600	34	sp|P00491|PNPH_HUMAN	PNPH	P00491
sp|P41567|EIF1_HUMAN;sp|O60739|EIF1B_HUMAN	15.9496	15.9072	14.7719	14.752	470870	11	sp|P41567|EIF1_HUMAN;sp|O60739|EIF1B_HUMAN	EIF1	P41567
sp|P25786|PSA1_HUMAN	15.9407	16.1555	14.8271	14.921	498500	17	sp|P25786|PSA1_HUMAN	PSA1	P25786
sp|Q9BV40|VAMP8_HUMAN	15.9385	15.8328	16.1704	16.0922	913760	18	sp|Q9BV40|VAMP8_HUMAN	VAMP8	Q9BV40
sp|P61158|ARP3_HUMAN	15.9132	15.2094	14.3887	13.5686	340240	14	sp|P61158|ARP3_HUMAN;sp|Q9P1U1|ARP3B_HUMAN;sp|Q9C0K3|ARP3C_HUMAN	ARP3	P61158
sp|P10114|RAP2A_HUMAN	15.8919	15.4041	15.5721	15.749	342670	11	sp|P10114|RAP2A_HUMAN	RAP2A	P10114
sp|P25445|TNR6_HUMAN	15.8918	15.8726	15.6216	16.0685	1110600	31	sp|P25445|TNR6_HUMAN	TNR6	P25445
sp|Q96C19|EFHD2_HUMAN	15.8868	15.8354	15.7157	15.8856	439540	13	sp|Q96C19|EFHD2_HUMAN;sp|Q9BUP0|EFHD1_HUMAN	EFHD2	Q96C19
sp|P68431|H31_HUMAN;sp|Q71DI3|H32_HUMAN;sp|Q16695|H31T_HUMAN;sp|Q6NXT2|H3C_HUMAN	15.8658	12.0979	15.9794	14.5577	355970	8	sp|P68431|H31_HUMAN;sp|Q71DI3|H32_HUMAN;sp|Q16695|H31T_HUMAN;sp|Q6NXT2|H3C_HUMAN	H31	P68431
sp|P49721|PSB2_HUMAN	15.8658	15.9266	15.5573	15.6811	572860	14	sp|P49721|PSB2_HUMAN	PSB2	P49721
sp|P20073|ANXA7_HUMAN	15.8625	15.8822	15.2342	15.2161	809900	23	sp|P20073|ANXA7_HUMAN	ANXA7	P20073
sp|Q68D91|MBLC2_HUMAN	15.8595	15.7302	15.3663	15.3927	973580	36	sp|Q68D91|MBLC2_HUMAN	MBLC2	Q68D91
sp|P17813|EGLN_HUMAN	15.8492	15.6935	17.2695	17.4544	1506800	21	sp|P17813|EGLN_HUMAN	EGLN	P17813
sp|P53680|AP2S1_HUMAN	15.8355	15.8667	12.7739	13.7579	342400	12	sp|P53680|AP2S1_HUMAN	AP2S1	P53680
sp|P62826|RAN_HUMAN	15.8315	15.7986	16.3369	16.1086	829640	16	sp|P62826|RAN_HUMAN	RAN	P62826
sp|P31948|STIP1_HUMAN	15.8042	15.7384	16.3814	16.1512	972570	24	sp|P31948|STIP1_HUMAN	STIP1	P31948
sp|P52943|CRIP2_HUMAN	15.7894	13.986	13.3626	13.7526	210210	7	sp|P52943|CRIP2_HUMAN	CRIP2	P52943
sp|O15212|PFD6_HUMAN	15.7564	15.6825	14.8838	15.1048	587500	16	sp|O15212|PFD6_HUMAN	PFD6	O15212
sp|Q9Y266|NUDC_HUMAN	15.7482	15.7671	15.3658	15.5224	819880	26	sp|Q9Y266|NUDC_HUMAN	NUDC	Q9Y266
sp|Q969P0|IGSF8_HUMAN	15.7446	16.072	19.1955	19.1831	8237600	37	sp|Q969P0|IGSF8_HUMAN	IGSF8	Q969P0
sp|O60884|DNJA2_HUMAN	15.7446	15.6873	16.2575	16.1485	689320	25	sp|O60884|DNJA2_HUMAN	DNJA2	O60884
sp|P21281|VATB2_HUMAN	15.7444	15.9627	15.3216	15.6184	475620	15	sp|P21281|VATB2_HUMAN;sp|P15313|VATB1_HUMAN	VATB2	P21281
sp|P30101|PDIA3_HUMAN	15.7437	15.6335	15.0965	15.2839	1421500	45	sp|P30101|PDIA3_HUMAN	PDIA3	P30101
sp|O60888|CUTA_HUMAN	15.7388	15.423	12.1178	11.4326	178260	6	sp|O60888|CUTA_HUMAN	CUTA	O60888
sp|P02545|LMNA_HUMAN	15.7326	15.5859	14.1202	13.9007	508130	25	sp|P02545|LMNA_HUMAN	LMNA	P02545
sp|Q9Y6E0|STK24_HUMAN	15.7316	15.9613	15.1973	15.1792	802390	22	sp|Q9Y6E0|STK24_HUMAN	STK24	Q9Y6E0
sp|P02786|TFR1_HUMAN	15.719	15.5444	16.6327	16.7089	2769800	56	sp|P02786|TFR1_HUMAN	TFR1	P02786
sp|P34932|HSP74_HUMAN	15.7178	15.603	16.2836	16.3502	1277500	36	sp|P34932|HSP74_HUMAN	HSP74	P34932
sp|Q9ULC3|RAB23_HUMAN	15.7137	15.6574	15.4527	15.2809	816460	22	sp|Q9ULC3|RAB23_HUMAN	RAB23	Q9ULC3
sp|Q9Y653|AGRG1_HUMAN	15.7073	15.5309	17.2827	17.1195	2214200	36	sp|Q9Y653|AGRG1_HUMAN	AGRG1	Q9Y653
sp|O75955|FLOT1_HUMAN	15.7046	15.7307	15.3527	15.2922	1014300	41	sp|O75955|FLOT1_HUMAN	FLOT1	O75955
sp|P13521|SCG2_HUMAN	15.7036	15.8866	13.5851	11.7425	258720	8	sp|P13521|SCG2_HUMAN	SCG2	P13521
sp|P61020|RAB5B_HUMAN	15.7006	15.9065	14.9812	15.5215	601380	21	sp|P61020|RAB5B_HUMAN	RAB5B	P61020
sp|O14737|PDCD5_HUMAN	15.6965	12.9141	15.3442	15.5574	423220	11	sp|O14737|PDCD5_HUMAN	PDCD5	O14737
sp|Q9UN37|VPS4A_HUMAN	15.6964	15.6468	15.559	15.8559	887530	25	sp|Q9UN37|VPS4A_HUMAN	VPS4A	Q9UN37
sp|P26641|EF1G_HUMAN	15.6959	15.6906	16.2038	16.1616	1251600	32	sp|P26641|EF1G_HUMAN	EF1G	P26641
sp|O95471|CLD7_HUMAN	15.6902	16.5841	17.2656	17.0975	1484700	18	sp|O95471|CLD7_HUMAN	CLD7	O95471
sp|Q9BPX5|ARP5L_HUMAN	15.6887	15.5586	13.2447	12.9947	217480	6	sp|Q9BPX5|ARP5L_HUMAN	ARP5L	Q9BPX5
sp|Q92783|STAM1_HUMAN	15.6801	15.6292	15.9148	16.288	1124800	24	sp|Q92783|STAM1_HUMAN	STAM1	Q92783
sp|P59998|ARPC4_HUMAN	15.6783	15.7599	15.5516	15.6848	581440	12	sp|P59998|ARPC4_HUMAN	ARPC4	P59998
sp|Q8N6C5|IGSF1_HUMAN	15.6706	15.9419	17.7599	17.4993	1702700	15	sp|Q8N6C5|IGSF1_HUMAN	IGSF1	Q8N6C5
sp|P15924|DESP_HUMAN	15.6689	15.2965	14.3569	14.2822	935710	50	sp|P15924|DESP_HUMAN	DESP	P15924
sp|P49720|PSB3_HUMAN	15.6685	15.1385	14.6889	14.0066	442300	20	sp|P49720|PSB3_HUMAN	PSB3	P49720
sp|P19105|ML12A_HUMAN;sp|O14950|ML12B_HUMAN;sp|P24844|MYL9_HUMAN	15.6623	15.6566	15.7453	15.8183	655220	19	sp|P19105|ML12A_HUMAN;sp|O14950|ML12B_HUMAN;sp|P24844|MYL9_HUMAN	ML12A	P19105
sp|P07204|TRBM_HUMAN	15.6582	15.3843	17.7497	16.7334	981700	14	sp|P07204|TRBM_HUMAN	TRBM	P07204
sp|Q9Y2Q5|LTOR2_HUMAN	15.6506	15.5515	15.4449	14.6432	302770	9	sp|Q9Y2Q5|LTOR2_HUMAN	LTOR2	Q9Y2Q5
sp|P12273|PIP_HUMAN	15.6458	15.6039	12.0167	13.6357	239540	10	sp|P12273|PIP_HUMAN	PIP	P12273
sp|P37837|TALDO_HUMAN	15.641	15.7555	14.7745	14.9181	442660	18	sp|P37837|TALDO_HUMAN	TALDO	P37837
sp|P61086|UBE2K_HUMAN	15.6405	13.747	15.2075	15.1826	509560	15	sp|P61086|UBE2K_HUMAN	UBE2K	P61086
sp|Q09666|AHNK_HUMAN	15.6294	15.2969	17.8225	18.0639	7514200	160	sp|Q09666|AHNK_HUMAN	AHNK	Q09666
sp|Q9BY43|CHM4A_HUMAN	15.6294	15.4032	16.4492	16.5487	854740	18	sp|Q9BY43|CHM4A_HUMAN	CHM4A	Q9BY43
sp|Q15181|IPYR_HUMAN	15.6228	16.4766	16.0556	16.3805	905570	22	sp|Q15181|IPYR_HUMAN	IPYR	Q15181
sp|P30511|HLAF_HUMAN	15.5911	15.6054	12.6571	13.9195	300970	12	sp|P30511|HLAF_HUMAN	HLAF	P30511
sp|P28072|PSB6_HUMAN	15.5885	15.3938	12.3272	13.0062	295660	10	sp|P28072|PSB6_HUMAN	PSB6	P28072
sp|Q13501|SQSTM_HUMAN	15.5806	15.5731	12.7773	12.792	164130	7	sp|Q13501|SQSTM_HUMAN	SQSTM	Q13501
sp|Q06323|PSME1_HUMAN	15.5753	15.4545	14.6563	14.5754	553080	21	sp|Q06323|PSME1_HUMAN	PSME1	Q06323
sp|Q6IAA8|LTOR1_HUMAN	15.5696	15.7521	15.6173	15.7394	521030	15	sp|Q6IAA8|LTOR1_HUMAN	LTOR1	Q6IAA8
sp|O00151|PDLI1_HUMAN	15.5677	15.2356	15.0424	15.3295	366130	12	sp|O00151|PDLI1_HUMAN	PDLI1	O00151
sp|Q14126|DSG2_HUMAN	15.5664	13.011	14.9767	15.0381	365690	12	sp|Q14126|DSG2_HUMAN	DSG2	Q14126
sp|P40121|CAPG_HUMAN	15.5622	15.3549	14.2884	14.5239	563230	20	sp|P40121|CAPG_HUMAN	CAPG	P40121
sp|P50281|MMP14_HUMAN	15.5562	15.4785	17.6731	17.6569	3374300	40	sp|P50281|MMP14_HUMAN	MMP14	P50281
sp|Q9NTK5|OLA1_HUMAN	15.5375	15.6735	15.334	15.0574	682020	23	sp|Q9NTK5|OLA1_HUMAN	OLA1	Q9NTK5
sp|Q9ULF5|S39AA_HUMAN	15.5288	15.6831	17.8294	17.9456	2366500	26	sp|Q9ULF5|S39AA_HUMAN	S39AA	Q9ULF5
sp|P00492|HPRT_HUMAN	15.5253	15.5454	15.14	14.8819	392750	13	sp|P00492|HPRT_HUMAN	HPRT	P00492
sp|O15400|STX7_HUMAN	15.5151	15.4706	15.6016	15.8144	524460	13	sp|O15400|STX7_HUMAN	STX7	O15400
sp|P21291|CSRP1_HUMAN	15.5008	15.6018	15.6212	15.7135	343880	10	sp|P21291|CSRP1_HUMAN	CSRP1	P21291
sp|P47895|AL1A3_HUMAN	15.496	15.1896	15.6659	15.9661	910730	26	sp|P47895|AL1A3_HUMAN	AL1A3	P47895
sp|P54753|EPHB3_HUMAN	15.4921	15.6403	12.1008	13.1086	234030	7	sp|P54753|EPHB3_HUMAN;sp|Q9UF33|EPHA6_HUMAN	EPHB3	P54753
sp|Q9HAV0|GBB4_HUMAN	15.489	15.5883	12.6872	13.7048	284030	12	sp|Q9HAV0|GBB4_HUMAN	GBB4	Q9HAV0
sp|O75044|SRGP2_HUMAN;sp|P0DMP2|SRG2B_HUMAN;sp|P0DJJ0|SRG2C_HUMAN	15.487	15.6676	15.2904	15.3734	828710	25	sp|O75044|SRGP2_HUMAN;sp|P0DMP2|SRG2B_HUMAN;sp|P0DJJ0|SRG2C_HUMAN	SRGP2	O75044
sp|P61006|RAB8A_HUMAN	15.4816	14.9812	16.9726	17.1671	1430700	24	sp|P61006|RAB8A_HUMAN	RAB8A	P61006
sp|P50502|F10A1_HUMAN;sp|Q8NFI4|F10A5_HUMAN;sp|Q8IZP2|ST134_HUMAN	15.4757	15.4721	16.5322	16.6632	1061400	14	sp|P50502|F10A1_HUMAN;sp|Q8NFI4|F10A5_HUMAN;sp|Q8IZP2|ST134_HUMAN	F10A1	P50502
sp|P06576|ATPB_HUMAN	15.4727	15.2342	14.126	14.9879	393900	19	sp|P06576|ATPB_HUMAN	ATPB	P06576
sp|Q9Y6M4|KC1G3_HUMAN	15.467	15.4465	15.9288	16.1758	674850	18	sp|Q9Y6M4|KC1G3_HUMAN	KC1G3	Q9Y6M4
sp|P23284|PPIB_HUMAN	15.4653	13.3915	14.902	15.2184	262270	8	sp|P23284|PPIB_HUMAN	PPIB	P23284
sp|Q92820|GGH_HUMAN	15.4643	15.3611	13.7664	14.1744	216300	9	sp|Q92820|GGH_HUMAN	GGH	Q92820
sp|P55072|TERA_HUMAN	15.4563	15.3541	16.4327	16.4722	2416600	56	sp|P55072|TERA_HUMAN	TERA	P55072
sp|P06493|CDK1_HUMAN	15.4448	15.2112	16.0109	16.1137	618860	17	sp|P06493|CDK1_HUMAN;sp|P24941|CDK2_HUMAN;sp|Q00526|CDK3_HUMAN;sp|Q00535|CDK5_HUMAN;sp|P11802|CDK4_HUMAN;sp|Q00534|CDK6_HUMAN;sp|P50750|CDK9_HUMAN;sp|Q96Q40|CDK15_HUMAN;sp|O94921|CDK14_HUMAN;sp|Q07002|CDK18_HUMAN;sp|Q00536|CDK16_HUMAN;sp|Q00537|CDK17_HUMAN;sp|Q9NYV4|CDK12_HUMAN;sp|Q14004|CDK13_HUMAN	CDK1	P06493
sp|P20339|RAB5A_HUMAN	15.4245	15.3236	15.6604	15.8138	677580	22	sp|P20339|RAB5A_HUMAN	RAB5A	P20339
sp|P46108|CRK_HUMAN	15.4206	15.4464	14.1327	14.6063	377820	16	sp|P46108|CRK_HUMAN	CRK	P46108
sp|Q96J02|ITCH_HUMAN	15.4193	15.6241	16.8381	16.9687	3372700	58	sp|Q96J02|ITCH_HUMAN	ITCH	Q96J02
sp|P49184|DNSL1_HUMAN	15.4113	16.0685	15.9228	15.918	945090	19	sp|P49184|DNSL1_HUMAN	DNSL1	P49184
sp|P35052|GPC1_HUMAN	15.4099	15.6635	16.2822	16.2728	808030	18	sp|P35052|GPC1_HUMAN	GPC1	P35052
sp|Q99961|SH3G1_HUMAN	15.409	15.7894	16.5502	17.0596	982280	20	sp|Q99961|SH3G1_HUMAN;sp|Q99962|SH3G2_HUMAN	SH3G1	Q99961
sp|P50895|BCAM_HUMAN	15.3982	14.3589	13.5093	12.6929	194340	11	sp|P50895|BCAM_HUMAN	BCAM	P50895
sp|P54760|EPHB4_HUMAN	15.3968	15.5794	16.4258	16.5089	943020	28	sp|P54760|EPHB4_HUMAN;sp|P29322|EPHA8_HUMAN;sp|P54756|EPHA5_HUMAN	EPHB4	P54760
sp|Q99747|SNAG_HUMAN	15.3866	15.4079	14.9507	14.865	461550	17	sp|Q99747|SNAG_HUMAN	SNAG	Q99747
sp|Q9UHR4|BI2L1_HUMAN	15.3758	14.9224	12.3239	12.9165	271210	14	sp|Q9UHR4|BI2L1_HUMAN	BI2L1	Q9UHR4
sp|P20020|AT2B1_HUMAN	15.3606	15.3112	16.6844	16.8002	2159300	39	sp|P20020|AT2B1_HUMAN	AT2B1	P20020
sp|P20290|BTF3_HUMAN	15.3567	15.2699	13.2725	12.9505	120260	5	sp|P20290|BTF3_HUMAN	BTF3	P20290
sp|Q9NVJ2|ARL8B_HUMAN;sp|Q96BM9|ARL8A_HUMAN	15.3559	14.8	12.147	13.0357	324350	11	sp|Q9NVJ2|ARL8B_HUMAN;sp|Q96BM9|ARL8A_HUMAN	ARL8B	Q9NVJ2
sp|P12429|ANXA3_HUMAN	15.3555	15.2409	15.0189	15.3024	731110	25	sp|P12429|ANXA3_HUMAN	ANXA3	P12429
sp|Q96BJ3|AIDA_HUMAN	15.3461	15.3985	15.6629	15.8274	657700	16	sp|Q96BJ3|AIDA_HUMAN	AIDA	Q96BJ3
sp|Q15223|NECT1_HUMAN	15.3378	14.8349	15.1793	15.2954	458370	19	sp|Q15223|NECT1_HUMAN	NECT1	Q15223
sp|P16152|CBR1_HUMAN	15.3298	14.9441	12.9164	13.9254	232670	11	sp|P16152|CBR1_HUMAN	CBR1	P16152
sp|Q9Y2A7|NCKP1_HUMAN	15.3294	15.2714	15.6508	16.0111	1120400	46	sp|Q9Y2A7|NCKP1_HUMAN	NCKP1	Q9Y2A7
sp|P27797|CALR_HUMAN	15.3189	15.2181	14.6729	14.9359	343060	14	sp|P27797|CALR_HUMAN	CALR	P27797
sp|P11940|PABP1_HUMAN	15.3134	15.4266	15.2762	15.2814	594200	23	sp|P11940|PABP1_HUMAN;sp|Q13310|PABP4_HUMAN;sp|Q4VXU2|PAP1L_HUMAN;sp|Q9H361|PABP3_HUMAN;sp|Q96DU9|PABP5_HUMAN	PABP1	P11940
sp|P63010|AP2B1_HUMAN;sp|Q10567|AP1B1_HUMAN	15.3074	15.3161	15.0317	14.9643	1228000	51	sp|P63010|AP2B1_HUMAN;sp|Q10567|AP1B1_HUMAN	AP2B1	P63010
sp|P17174|AATC_HUMAN	15.3042	15.4066	14.4733	14.7425	430550	21	sp|P17174|AATC_HUMAN	AATC	P17174
sp|Q13442|HAP28_HUMAN	15.2835	15.5244	15.0652	15.1219	331480	8	sp|Q13442|HAP28_HUMAN	HAP28	Q13442
sp|P13929|ENOB_HUMAN	15.2674	15.0283	12.3924	13.027	386020	6	sp|P13929|ENOB_HUMAN	ENOB	P13929
sp|P22223|CADH3_HUMAN	15.2652	15.1034	16.2577	16.2824	892620	23	sp|P22223|CADH3_HUMAN	CADH3	P22223
sp|Q99805|TM9S2_HUMAN	15.2628	15.2308	15.1649	15.4107	355250	14	sp|Q99805|TM9S2_HUMAN	TM9S2	Q99805
sp|Q14247|SRC8_HUMAN	15.247	15.1253	13.912	14.707	389620	16	sp|Q14247|SRC8_HUMAN	SRC8	Q14247
sp|Q93050|VPP1_HUMAN	15.2323	14.8525	15.0764	15.5353	517610	20	sp|Q93050|VPP1_HUMAN;sp|Q9Y487|VPP2_HUMAN	VPP1	Q93050
sp|Q96QV6|H2A1A_HUMAN;sp|P16104|H2AX_HUMAN;sp|Q8IUE6|H2A2B_HUMAN	15.2309	14.9175	13.5746	12.4321	115940	7	sp|Q96QV6|H2A1A_HUMAN;sp|P16104|H2AX_HUMAN;sp|Q8IUE6|H2A2B_HUMAN;REV__sp|Q8NB25|F184A_HUMAN	H2A1A	Q96QV6
sp|O75054|IGSF3_HUMAN	15.2283	15.3759	17.3312	17.3724	3598900	61	sp|O75054|IGSF3_HUMAN	IGSF3	O75054
sp|Q9Y3E7|CHMP3_HUMAN	15.2264	15.4445	12.5295	13.4695	488450	11	sp|Q9Y3E7|CHMP3_HUMAN	CHMP3	Q9Y3E7
sp|O76003|GLRX3_HUMAN	15.2061	15.0638	14.8874	14.83	401810	14	sp|O76003|GLRX3_HUMAN	GLRX3	O76003
sp|P46940|IQGA1_HUMAN	15.2048	14.9693	15.9446	16.0669	1682300	67	sp|P46940|IQGA1_HUMAN	IQGA1	P46940
sp|O95817|BAG3_HUMAN	15.2041	15.0382	13.0772	12.6179	173770	7	sp|O95817|BAG3_HUMAN	BAG3	O95817
sp|P30043|BLVRB_HUMAN	15.2022	15.1626	13.9076	14.2211	177630	11	sp|P30043|BLVRB_HUMAN	BLVRB	P30043
sp|Q92882|OSTF1_HUMAN	15.1925	15.2131	13.3121	13.1561	162940	8	sp|Q92882|OSTF1_HUMAN	OSTF1	Q92882
sp|Q9Y265|RUVB1_HUMAN	15.1902	15.2238	15.1769	15.3092	737900	32	sp|Q9Y265|RUVB1_HUMAN	RUVB1	Q9Y265
sp|P04156|PRIO_HUMAN	15.1841	15.1669	15.9513	15.9199	452700	11	sp|P04156|PRIO_HUMAN	PRIO	P04156
sp|Q99733|NP1L4_HUMAN	15.1597	12.08	12.7378	14.6106	184470	6	sp|Q99733|NP1L4_HUMAN	NP1L4	Q99733
sp|P53999|TCP4_HUMAN	15.1585	15.0618	12.2729	12.8831	126600	4	sp|P53999|TCP4_HUMAN	TCP4	P53999
sp|Q13177|PAK2_HUMAN	15.1391	15.2998	14.9625	15.2686	515290	22	sp|Q13177|PAK2_HUMAN;sp|Q13153|PAK1_HUMAN;sp|O75914|PAK3_HUMAN	PAK2	Q13177
sp|Q9UHV9|PFD2_HUMAN	15.1276	13.2372	15.541	15.8526	331500	7	sp|Q9UHV9|PFD2_HUMAN	PFD2	Q9UHV9
sp|P23381|SYWC_HUMAN	15.1264	14.1443	14.7759	14.5744	252380	16	sp|P23381|SYWC_HUMAN	SYWC	P23381
sp|O15498|YKT6_HUMAN	15.1255	14.519	15.1644	15.1088	731580	24	sp|O15498|YKT6_HUMAN	YKT6	O15498
sp|Q9NZM1|MYOF_HUMAN	15.1252	14.5641	16.2046	16.468	2508300	85	sp|Q9NZM1|MYOF_HUMAN;sp|O75923|DYSF_HUMAN	MYOF	Q9NZM1
sp|Q99536|VAT1_HUMAN	15.1249	15.1757	16.67	16.8451	1258600	24	sp|Q99536|VAT1_HUMAN	VAT1	Q99536
sp|Q16651|PRSS8_HUMAN	15.1248	15.0857	14.4453	14.8374	230400	9	sp|Q16651|PRSS8_HUMAN	PRSS8	Q16651
sp|O95858|TSN15_HUMAN	15.1234	14.8646	15.1018	15.2109	267520	8	sp|O95858|TSN15_HUMAN	TSN15	O95858
sp|P55327|TPD52_HUMAN	15.1217	15.2298	14.2989	14.5057	283020	12	sp|P55327|TPD52_HUMAN	TPD52	P55327
sp|Q15257|PTPA_HUMAN	15.1196	14.0455	14.9813	15.4164	379030	12	sp|Q15257|PTPA_HUMAN	PTPA	Q15257
sp|Q9UNN8|EPCR_HUMAN	15.1188	13.6137	16.0508	16.3401	462510	11	sp|Q9UNN8|EPCR_HUMAN	EPCR	Q9UNN8
sp|P19634|SL9A1_HUMAN	15.1181	15.2074	17.0866	16.9078	1249200	23	sp|P19634|SL9A1_HUMAN;sp|Q9UBY0|SL9A2_HUMAN	SL9A1	P19634
sp|Q96RF0|SNX18_HUMAN	15.1117	12.4422	15.9307	15.9941	660240	17	sp|Q96RF0|SNX18_HUMAN	SNX18	Q96RF0
sp|Q9Y617|SERC_HUMAN	15.1105	14.9635	15.5161	15.7275	789460	26	sp|Q9Y617|SERC_HUMAN	SERC	Q9Y617
sp|P55011|S12A2_HUMAN	15.1092	15.1362	16.3932	16.6104	1719800	44	sp|P55011|S12A2_HUMAN	S12A2	P55011
sp|P43487|RANG_HUMAN	15.1024	14.8945	15.7796	15.8779	457990	10	sp|P43487|RANG_HUMAN	RANG	P43487
sp|P05187|PPB1_HUMAN;sp|P10696|PPBN_HUMAN	15.09	15.2334	12.8598	13.4585	218870	11	sp|P05187|PPB1_HUMAN;sp|P10696|PPBN_HUMAN	PPB1	P05187
sp|P50443|S26A2_HUMAN	15.0867	15.4744	14.416	12.6649	359570	13	sp|P50443|S26A2_HUMAN	S26A2	P50443
sp|P40227|TCPZ_HUMAN	15.0846	14.3523	15.6478	15.8091	568420	23	sp|P40227|TCPZ_HUMAN	TCPZ	P40227
sp|Q9H2G2|SLK_HUMAN	15.083	14.9714	15.5224	15.5747	590270	27	sp|Q9H2G2|SLK_HUMAN	SLK	Q9H2G2
sp|P51151|RAB9A_HUMAN;sp|Q9NP90|RAB9B_HUMAN	15.0734	12.7838	12.2289	14.4907	188410	8	sp|P51151|RAB9A_HUMAN;sp|Q9NP90|RAB9B_HUMAN	RAB9A	P51151
sp|Q96CW1|AP2M1_HUMAN	15.0729	15.1288	14.62	14.8412	251590	8	sp|Q96CW1|AP2M1_HUMAN	AP2M1	Q96CW1
sp|Q9NUM4|T106B_HUMAN	15.0578	14.8378	13.9789	14.718	234330	10	sp|Q9NUM4|T106B_HUMAN	T106B	Q9NUM4
sp|P10809|CH60_HUMAN	15.0494	15.1263	15.8051	15.8111	1187400	40	sp|P10809|CH60_HUMAN	CH60	P10809
sp|O95865|DDAH2_HUMAN	15.0455	15.0593	12.8532	13.1374	161960	8	sp|O95865|DDAH2_HUMAN	DDAH2	O95865
sp|P48739|PIPNB_HUMAN	15.0393	13.4496	15.2614	15.2733	398690	14	sp|P48739|PIPNB_HUMAN	PIPNB	P48739
sp|Q9Y5Z4|HEBP2_HUMAN	15.0375	15.365	13.1411	12.2527	298480	12	sp|Q9Y5Z4|HEBP2_HUMAN	HEBP2	Q9Y5Z4
sp|Q13753|LAMC2_HUMAN	15.0301	14.8464	15.0332	14.9366	620940	28	sp|Q13753|LAMC2_HUMAN	LAMC2	Q13753
sp|P49768|PSN1_HUMAN;sp|P49810|PSN2_HUMAN	15.0257	15.1359	14.222	14.8173	427430	19	sp|P49768|PSN1_HUMAN;sp|P49810|PSN2_HUMAN	PSN1	P49768
sp|P07948|LYN_HUMAN	15.0222	15.0541	15.8612	16.2002	1085400	29	sp|P07948|LYN_HUMAN;sp|P08631|HCK_HUMAN	LYN	P07948
sp|O95782|AP2A1_HUMAN	15.02	15.1603	14.5452	14.6781	580740	28	sp|O95782|AP2A1_HUMAN	AP2A1	O95782
sp|Q9H0X4|F234A_HUMAN	15.0194	15.166	15.7188	15.6554	783330	22	sp|Q9H0X4|F234A_HUMAN	F234A	Q9H0X4
sp|Q9UMX0|UBQL1_HUMAN	15.0062	14.9594	14.5931	14.9298	308600	15	sp|Q9UMX0|UBQL1_HUMAN;sp|Q9UHD9|UBQL2_HUMAN;sp|Q9NRR5|UBQL4_HUMAN	UBQL1	Q9UMX0
sp|Q07021|C1QBP_HUMAN	15.0003	14.7181	12.9805	14.9748	220700	7	sp|Q07021|C1QBP_HUMAN	C1QBP	Q07021
sp|Q15691|MARE1_HUMAN	14.9872	15.1039	13.5867	14.5342	244990	13	sp|Q15691|MARE1_HUMAN;sp|Q9UPY8|MARE3_HUMAN	MARE1	Q15691
sp|Q14574|DSC3_HUMAN	14.9842	15.0583	11.601	13.534	103200	5	sp|Q14574|DSC3_HUMAN	DSC3	Q14574
sp|O15162|PLS1_HUMAN	14.9839	15.164	15.6425	15.2787	281260	8	sp|O15162|PLS1_HUMAN	PLS1	O15162
sp|O43491|E41L2_HUMAN	14.9838	14.776	17.184	17.03	2209900	49	sp|O43491|E41L2_HUMAN;sp|Q9Y2J2|E41L3_HUMAN	E41L2	O43491
sp|P15151|PVR_HUMAN	14.9796	15.0325	17.3398	17.261	1149200	20	sp|P15151|PVR_HUMAN	PVR	P15151
sp|O95630|STABP_HUMAN	14.9698	14.7488	14.9389	15.4276	557660	20	sp|O95630|STABP_HUMAN	STABP	O95630
sp|P31150|GDIA_HUMAN	14.9559	15.0959	14.8545	12.3136	261560	10	sp|P31150|GDIA_HUMAN	GDIA	P31150
sp|O60669|MOT2_HUMAN	14.9376	14.9782	15.7229	15.5449	488260	13	sp|O60669|MOT2_HUMAN	MOT2	O60669
sp|Q14116|IL18_HUMAN	14.9089	14.9544	12.9533	12.6861	74429	4	sp|Q14116|IL18_HUMAN	IL18	Q14116
sp|P68400|CSK21_HUMAN;sp|Q8NEV1|CSK23_HUMAN	14.9069	14.7792	14.5489	14.9089	512610	25	sp|P68400|CSK21_HUMAN;sp|Q8NEV1|CSK23_HUMAN;sp|P19784|CSK22_HUMAN;sp|P17540|KCRS_HUMAN	CSK21	P68400
sp|P14625|ENPL_HUMAN	14.9052	14.9557	15.0153	15.354	748780	31	sp|P14625|ENPL_HUMAN;sp|Q58FF3|ENPLL_HUMAN	ENPL	P14625
sp|Q14103|HNRPD_HUMAN	14.905	12.2738	12.9902	13.1521	170230	4	sp|Q14103|HNRPD_HUMAN	HNRPD	Q14103
sp|P47755|CAZA2_HUMAN	14.8933	14.7398	13.9842	14.0679	270260	15	sp|P47755|CAZA2_HUMAN	CAZA2	P47755
sp|P15374|UCHL3_HUMAN	14.8898	15.3907	13.418	14.5804	241070	12	sp|P15374|UCHL3_HUMAN	UCHL3	P15374
sp|Q92485|ASM3B_HUMAN	14.8657	14.9476	13.2428	14.3072	253260	11	sp|Q92485|ASM3B_HUMAN	ASM3B	Q92485
sp|Q9BRG1|VPS25_HUMAN	14.8445	14.2388	17.5629	17.2529	2199900	28	sp|Q9BRG1|VPS25_HUMAN	VPS25	Q9BRG1
sp|P55196|AFAD_HUMAN	14.8411	14.7265	13.7604	14.125	245100	15	sp|P55196|AFAD_HUMAN	AFAD	P55196
sp|Q9H2J7|S6A15_HUMAN	14.8188	14.8891	17.5105	17.5887	3640300	36	sp|Q9H2J7|S6A15_HUMAN	S6A15	Q9H2J7
sp|P25311|ZA2G_HUMAN	14.7992	14.6981	13.648	12.9898	112200	5	sp|P25311|ZA2G_HUMAN	ZA2G	P25311
sp|P28074|PSB5_HUMAN	14.7924	14.9746	15.0706	15.3537	680770	28	sp|P28074|PSB5_HUMAN	PSB5	P28074
sp|P11766|ADHX_HUMAN	14.7915	14.6658	15.7231	15.911	484040	12	sp|P11766|ADHX_HUMAN	ADHX	P11766
sp|Q9Y6W5|WASF2_HUMAN	14.7858	14.4782	14.4577	14.2165	263450	14	sp|Q9Y6W5|WASF2_HUMAN;sp|Q9UPY6|WASF3_HUMAN	WASF2	Q9Y6W5
sp|Q9UBS4|DJB11_HUMAN	14.7808	14.7091	13.3774	13.295	110050	5	sp|Q9UBS4|DJB11_HUMAN	DJB11	Q9UBS4
sp|P60842|IF4A1_HUMAN;sp|Q14240|IF4A2_HUMAN	14.7669	14.0194	15.4977	16.1033	567260	20	sp|P60842|IF4A1_HUMAN;sp|Q14240|IF4A2_HUMAN	IF4A1	P60842
sp|Q9UL46|PSME2_HUMAN	14.7656	14.6028	11.4667	13.0572	134320	8	sp|Q9UL46|PSME2_HUMAN	PSME2	Q9UL46
sp|P52209|6PGD_HUMAN	14.7648	14.5566	15.1439	15.2726	490790	18	sp|P52209|6PGD_HUMAN	6PGD	P52209
sp|Q02413|DSG1_HUMAN	14.7635	14.8535	14.399	14.0536	272340	16	sp|Q02413|DSG1_HUMAN	DSG1	Q02413
sp|P07237|PDIA1_HUMAN	14.7613	14.6913	14.2051	14.2581	351030	19	sp|P07237|PDIA1_HUMAN	PDIA1	P07237
sp|P35237|SPB6_HUMAN	14.7428	12.4912	14.5766	14.7635	224800	12	sp|P35237|SPB6_HUMAN	SPB6	P35237
sp|P30153|2AAA_HUMAN	14.7404	14.4601	14.3491	14.3726	389460	24	sp|P30153|2AAA_HUMAN;sp|P30154|2AAB_HUMAN	2AAA	P30153
sp|Q92930|RAB8B_HUMAN	14.7318	14.7834	13.357	11.6264	118090	7	sp|Q92930|RAB8B_HUMAN	RAB8B	Q92930
sp|Q8N4C8|MINK1_HUMAN	14.7232	13.9501	16.2729	16.4537	1195300	27	sp|Q8N4C8|MINK1_HUMAN	MINK1	Q8N4C8
sp|O75223|GGCT_HUMAN	14.7209	13.7609	14.5439	14.3091	234190	13	sp|O75223|GGCT_HUMAN	GGCT	O75223
sp|Q9NP72|RAB18_HUMAN	14.7162	14.7926	14.5907	14.9937	297560	11	sp|Q9NP72|RAB18_HUMAN	RAB18	Q9NP72
sp|O95716|RAB3D_HUMAN	14.7145	14.6593	11.1602	13.6359	379230	12	sp|O95716|RAB3D_HUMAN;sp|P20337|RAB3B_HUMAN	RAB3D	O95716
sp|Q9NRY6|PLS3_HUMAN	14.7119	14.799	16.5863	16.7414	733130	10	sp|Q9NRY6|PLS3_HUMAN	PLS3	Q9NRY6
sp|Q8N183|NDUF2_HUMAN	14.7091	14.8116	15.6205	15.5955	460700	16	sp|Q8N183|NDUF2_HUMAN	NDUF2	Q8N183
sp|P30740|ILEU_HUMAN	14.7049	14.7317	14.079	14.39	223560	10	sp|P30740|ILEU_HUMAN;sp|P50453|SPB9_HUMAN;sp|O75830|SPI2_HUMAN	ILEU	P30740
sp|P68402|PA1B2_HUMAN	14.6666	14.9708	14.5362	14.1051	187510	9	sp|P68402|PA1B2_HUMAN	PA1B2	P68402
sp|Q8N4S9|MALD2_HUMAN	14.6666	14.5726	15.1153	15.2832	388440	14	sp|Q8N4S9|MALD2_HUMAN	MALD2	Q8N4S9
sp|Q4KMQ2|ANO6_HUMAN	14.6549	14.3772	15.5799	15.6736	628850	22	sp|Q4KMQ2|ANO6_HUMAN	ANO6	Q4KMQ2
sp|P49368|TCPG_HUMAN	14.6487	15.0766	15.9873	16.2439	822980	26	sp|P49368|TCPG_HUMAN	TCPG	P49368
sp|O75083|WDR1_HUMAN	14.6477	13.3684	16.6224	16.8406	1004100	25	sp|O75083|WDR1_HUMAN	WDR1	O75083
sp|P08133|ANXA6_HUMAN	14.6436	14.6811	16.7382	17.1581	1880800	39	sp|P08133|ANXA6_HUMAN	ANXA6	P08133
sp|P29401|TKT_HUMAN	14.6433	14.1012	15.5785	16.1942	941180	29	sp|P29401|TKT_HUMAN	TKT	P29401
sp|Q9Y446|PKP3_HUMAN	14.64	14.2409	15.8342	16.2011	1328800	43	sp|Q9Y446|PKP3_HUMAN	PKP3	Q9Y446
sp|P17302|CXA1_HUMAN	14.6366	12.8439	18.4461	18.4725	4549300	29	sp|P17302|CXA1_HUMAN	CXA1	P17302
sp|P30085|KCY_HUMAN	14.6259	14.5573	14.177	14.1921	306190	17	sp|P30085|KCY_HUMAN	KCY	P30085
sp|P48066|S6A11_HUMAN	14.6035	13.0056	13.4124	13.0983	114890	3	sp|P48066|S6A11_HUMAN	S6A11	P48066
sp|P00966|ASSY_HUMAN	14.6016	14.8083	15.1518	15.0107	432420	17	sp|P00966|ASSY_HUMAN	ASSY	P00966
sp|P46926|GNPI1_HUMAN	14.5925	12.9673	15.2257	15.4523	523660	15	sp|P46926|GNPI1_HUMAN;sp|Q8TDQ7|GNPI2_HUMAN	GNPI1	P46926
sp|O14763|TR10B_HUMAN	14.5874	14.3387	17.7639	17.0104	1205600	19	sp|O14763|TR10B_HUMAN	TR10B	O14763
sp|O95379|TFIP8_HUMAN	14.5754	14.0439	13.7866	12.83	105830	8	sp|O95379|TFIP8_HUMAN	TFIP8	O95379
sp|P43007|SATT_HUMAN	14.5749	13.9593	16.4498	16.501	776510	15	sp|P43007|SATT_HUMAN	SATT	P43007
sp|P40926|MDHM_HUMAN	14.5674	13.9535	15.3131	14.7751	239550	10	sp|P40926|MDHM_HUMAN	MDHM	P40926
sp|Q9UKY7|CDV3_HUMAN	14.5619	13.3052	12.1617	12.3203	32677	2	sp|Q9UKY7|CDV3_HUMAN	CDV3	Q9UKY7
sp|Q9NRR3|C42S2_HUMAN	14.5575	14.5827	13.0949	12.7111	516330	10	sp|Q9NRR3|C42S2_HUMAN	C42S2	Q9NRR3
sp|P19623|SPEE_HUMAN	14.5549	14.7462	15.736	16.0486	578770	12	sp|P19623|SPEE_HUMAN	SPEE	P19623
sp|Q9C005|DPY30_HUMAN	14.5308	14.1232	12.4074	12.4723	80379	7	sp|Q9C005|DPY30_HUMAN	DPY30	Q9C005
sp|Q9NQR4|NIT2_HUMAN	14.5291	13.36	14.4106	14.8253	203250	11	sp|Q9NQR4|NIT2_HUMAN	NIT2	Q9NQR4
sp|P19338|NUCL_HUMAN	14.5278	14.2978	13.9327	14.3731	302560	15	sp|P19338|NUCL_HUMAN	NUCL	P19338
sp|O14936|CSKP_HUMAN	14.5258	14.2091	16.0998	16.5516	987570	33	sp|O14936|CSKP_HUMAN	CSKP	O14936
sp|Q16864|VATF_HUMAN	14.5196	14.5198	12.2609	13.2615	80420	5	sp|Q16864|VATF_HUMAN	VATF	Q16864
sp|Q13126|MTAP_HUMAN	14.5194	14.4327	11.6376	12.632	323910	19	sp|Q13126|MTAP_HUMAN	MTAP	Q13126
sp|P36405|ARL3_HUMAN	14.5085	14.9096	12.6116	14.2617	196240	9	sp|P36405|ARL3_HUMAN	ARL3	P36405
sp|P61160|ARP2_HUMAN	14.4999	13.7501	15.0213	15.073	331510	11	sp|P61160|ARP2_HUMAN	ARP2	P61160
sp|Q13867|BLMH_HUMAN	14.4944	12.2053	15.4479	15.816	311200	11	sp|Q13867|BLMH_HUMAN	BLMH	Q13867
sp|P25685|DNJB1_HUMAN	14.475	12.6604	14.5087	14.7746	199940	7	sp|P25685|DNJB1_HUMAN	DNJB1	P25685
sp|Q9NS93|TM7S3_HUMAN	14.4656	14.2715	11.6574	13.0888	89387	5	sp|Q9NS93|TM7S3_HUMAN	TM7S3	Q9NS93
sp|P50552|VASP_HUMAN	14.4602	12.7144	12.5463	14.1488	159030	11	sp|P50552|VASP_HUMAN	VASP	P50552
sp|Q96J84|KIRR1_HUMAN	14.4493	13.3187	17.3735	17.4193	1713800	35	sp|Q96J84|KIRR1_HUMAN	KIRR1	Q96J84
sp|P48643|TCPE_HUMAN	14.4469	14.2217	15.0253	14.9618	524410	22	sp|P48643|TCPE_HUMAN	TCPE	P48643
sp|P63208|SKP1_HUMAN	14.4314	14.5829	13.012	12.424	210500	14	sp|P63208|SKP1_HUMAN	SKP1	P63208
sp|P61978|HNRPK_HUMAN	14.4206	14.1486	13.915	14.2702	224250	17	sp|P61978|HNRPK_HUMAN	HNRPK	P61978
sp|Q9P206|K1522_HUMAN	14.4163	12.3309	15.3019	15.3856	347640	18	sp|Q9P206|K1522_HUMAN	K1522	Q9P206
sp|P43003|EAA1_HUMAN	14.4115	13.5617	12.0581	12.6185	11921	2	sp|P43003|EAA1_HUMAN	EAA1	P43003
sp|P78536|ADA17_HUMAN	14.4067	13.9498	14.8	15.0599	329400	12	sp|P78536|ADA17_HUMAN	ADA17	P78536
sp|P18206|VINC_HUMAN	14.3996	14.3475	15.6272	15.7876	905990	32	sp|P18206|VINC_HUMAN	VINC	P18206
sp|P14314|GLU2B_HUMAN	14.3888	13.4903	12.9383	13.1868	43209	3	sp|P14314|GLU2B_HUMAN	GLU2B	P14314
sp|P02686|MBP_HUMAN	14.386	11.6829	12.9331	14.0282	30317	2	sp|P02686|MBP_HUMAN	MBP	P02686
sp|O75131|CPNE3_HUMAN	14.3564	12.1226	15.9353	16.0655	556120	12	sp|O75131|CPNE3_HUMAN;sp|Q96FN4|CPNE2_HUMAN;sp|Q96A23|CPNE4_HUMAN;sp|O95741|CPNE6_HUMAN;sp|Q9UBL6|CPNE7_HUMAN	CPNE3	O75131
sp|Q9UBC2|EP15R_HUMAN	14.3548	13.7252	14.1268	14.154	172160	9	sp|Q9UBC2|EP15R_HUMAN	EP15R	Q9UBC2
sp|P35232|PHB_HUMAN	14.3533	14.1611	12.2705	13.7485	93863	8	sp|P35232|PHB_HUMAN	PHB	P35232
sp|P08582|TRFM_HUMAN	14.3527	14.1587	14.6914	14.9209	310670	16	sp|P08582|TRFM_HUMAN	TRFM	P08582
sp|Q13509|TBB3_HUMAN	14.3454	13.6208	12.4729	13.1345	17612	2	sp|Q13509|TBB3_HUMAN	TBB3	Q13509
sp|P23396|RS3_HUMAN	14.343	13.1642	15.2386	15.4352	454390	14	sp|P23396|RS3_HUMAN	RS3	P23396
sp|O60664|PLIN3_HUMAN	14.3392	12.1299	13.5575	14.0516	146850	10	sp|O60664|PLIN3_HUMAN	PLIN3	O60664
sp|Q08174|PCDH1_HUMAN	14.3265	14.3976	16.2713	16.4042	746220	15	sp|Q08174|PCDH1_HUMAN	PCDH1	Q08174
sp|P12081|HARS1_HUMAN	14.3125	14.4907	14.5365	15.0596	374080	19	sp|P12081|HARS1_HUMAN;sp|P49590|SYHM_HUMAN	HARS1	P12081
sp|Q9Y6X5|ENPP4_HUMAN;sp|Q6UWV6|ENPP7_HUMAN	14.3114	12.9312	13.502	11.733	89307	4	sp|Q9Y6X5|ENPP4_HUMAN;sp|Q6UWV6|ENPP7_HUMAN	ENPP4	Q9Y6X5
sp|P61960|UFM1_HUMAN	14.3019	14.5443	15.8897	15.6153	343480	10	sp|P61960|UFM1_HUMAN	UFM1	P61960
sp|Q06124|PTN11_HUMAN	14.2956	14.2633	14.4774	14.6895	258400	18	sp|Q06124|PTN11_HUMAN	PTN11	Q06124
sp|Q6P1M3|L2GL2_HUMAN	14.2931	13.3907	13.2217	12.1412	54010	4	sp|Q6P1M3|L2GL2_HUMAN	L2GL2	Q6P1M3
sp|P61313|RL15_HUMAN	14.2929	13.3076	13.4945	12.4405	24806	4	sp|P61313|RL15_HUMAN	RL15	P61313
sp|Q9BX26|SYCP2_HUMAN	14.2911	12.9686	13.3369	12.618	9351600	4	sp|Q9BX26|SYCP2_HUMAN	SYCP2	Q9BX26
sp|Q08334|I10R2_HUMAN	14.291	12.3191	12.9118	12.2381	5990.5	1	sp|Q08334|I10R2_HUMAN	I10R2	Q08334
sp|Q02241|KIF23_HUMAN	14.2728	14.2046	15.4497	15.7475	984880	41	sp|Q02241|KIF23_HUMAN	KIF23	Q02241
sp|O75787|RENR_HUMAN	14.2706	14.4528	12.2987	13.3604	159420	5	sp|O75787|RENR_HUMAN	RENR	O75787
sp|Q8IXS6|PALM2_HUMAN	14.2706	13.0224	12.9022	12.1786	36644	4	sp|Q8IXS6|PALM2_HUMAN	PALM2	Q8IXS6
sp|P43034|LIS1_HUMAN	14.2646	13.9622	14.6721	14.9465	363810	17	sp|P43034|LIS1_HUMAN	LIS1	P43034
sp|Q01581|HMCS1_HUMAN	14.2513	12.0229	14.9093	15.094	372240	11	sp|Q01581|HMCS1_HUMAN;sp|P54868|HMCS2_HUMAN	HMCS1	Q01581
sp|P10768|ESTD_HUMAN	14.2444	14.316	14.836	14.9434	303670	13	sp|P10768|ESTD_HUMAN	ESTD	P10768
sp|Q86UD5|SL9B2_HUMAN	14.2424	12.5963	12.1849	12.2604	25099	1	sp|Q86UD5|SL9B2_HUMAN	SL9B2	Q86UD5
sp|P50991|TCPD_HUMAN	14.2421	14.0393	15.578	15.6943	504950	20	sp|P50991|TCPD_HUMAN	TCPD	P50991
sp|P24666|PPAC_HUMAN	14.2412	13.6511	14.757	15.082	150530	6	sp|P24666|PPAC_HUMAN	PPAC	P24666
sp|Q03154|ACY1_HUMAN	14.2338	12.6632	12.5544	12.405	14135	1	sp|Q03154|ACY1_HUMAN	ACY1	Q03154
sp|Q9BWD1|THIC_HUMAN	14.2255	13.366	15.257	14.6178	158750	5	sp|Q9BWD1|THIC_HUMAN	THIC	Q9BWD1
sp|Q14512|FGFP1_HUMAN	14.2235	14.265	12.08	13.5663	90681	6	sp|Q14512|FGFP1_HUMAN	FGFP1	Q14512
sp|Q05639|EF1A2_HUMAN	14.2207	12.6402	13.8099	14.1652	451940	5	sp|Q05639|EF1A2_HUMAN	EF1A2	Q05639
sp|P78371|TCPB_HUMAN	14.2173	13.7047	15.6554	14.9644	717500	31	sp|P78371|TCPB_HUMAN	TCPB	P78371
sp|Q96S97|MYADM_HUMAN	14.2145	12.4893	14.2583	13.231	46685	1	sp|Q96S97|MYADM_HUMAN	MYADM	Q96S97
sp|Q96IX5|ATPMD_HUMAN	14.2121	12.7513	12.7787	13.9206	15850	2	sp|Q96IX5|ATPMD_HUMAN	ATPMD	Q96IX5
sp|P01034|CYTC_HUMAN	14.2051	13.6574	12.551	13.5082	10376	1	sp|P01034|CYTC_HUMAN	CYTC	P01034
sp|Q9BYI3|HYCCI_HUMAN;sp|Q8IXS8|F126B_HUMAN	14.2025	12.3447	14.3317	12.8405	18335	2	sp|Q9BYI3|HYCCI_HUMAN;sp|Q8IXS8|F126B_HUMAN	HYCCI	Q9BYI3
sp|P61221|ABCE1_HUMAN	14.1864	12.6524	14.919	14.8985	115220	5	sp|P61221|ABCE1_HUMAN	ABCE1	P61221
sp|Q96FW1|OTUB1_HUMAN	14.1846	13.7581	13.7942	14.2343	204120	12	sp|Q96FW1|OTUB1_HUMAN	OTUB1	Q96FW1
sp|O43175|SERA_HUMAN	14.1796	12.6694	14.7378	14.8888	277950	9	sp|O43175|SERA_HUMAN	SERA	O43175
sp|P17987|TCPA_HUMAN	14.1709	13.2774	15.0149	15.4158	460530	22	sp|P17987|TCPA_HUMAN	TCPA	P17987
sp|Q9Y2B0|CNPY2_HUMAN	14.1682	13.907	12.4558	13.1369	15353	2	sp|Q9Y2B0|CNPY2_HUMAN	CNPY2	Q9Y2B0
sp|P32926|DSG3_HUMAN	14.1653	13.6297	13.2073	13.5143	64141	5	sp|P32926|DSG3_HUMAN	DSG3	P32926
sp|Q7L576|CYFP1_HUMAN	14.1635	13.8765	15.8169	15.9156	1197300	43	sp|Q7L576|CYFP1_HUMAN	CYFP1	Q7L576
sp|Q8TD43|TRPM4_HUMAN	14.1634	14.254	12.1354	12.3827	7163.1	1	sp|Q8TD43|TRPM4_HUMAN	TRPM4	Q8TD43
sp|Q9BXS9|S26A6_HUMAN	14.1633	12.227	12.9559	13.0737	39669	2	sp|Q9BXS9|S26A6_HUMAN	S26A6	Q9BXS9
sp|P28161|GSTM2_HUMAN;sp|P46439|GSTM5_HUMAN;sp|P21266|GSTM3_HUMAN	14.1608	13.5794	14.1927	13.7101	111870	6	sp|P28161|GSTM2_HUMAN;sp|P46439|GSTM5_HUMAN;sp|P21266|GSTM3_HUMAN	GSTM2	P28161
sp|P51809|VAMP7_HUMAN	14.1523	13.2485	14.8426	14.8417	147290	7	sp|P51809|VAMP7_HUMAN	VAMP7	P51809
sp|O60603|TLR2_HUMAN	14.1522	13.4571	12.6099	11.6577	58020	4	sp|O60603|TLR2_HUMAN	TLR2	O60603
sp|P54577|SYYC_HUMAN	14.1484	13.1899	11.9856	13.4692	35343	2	sp|P54577|SYYC_HUMAN	SYYC	P54577
sp|O00487|PSDE_HUMAN	14.1399	12.3632	13.6572	14.2686	50856	4	sp|O00487|PSDE_HUMAN	PSDE	O00487
sp|Q8IVM0|CCD50_HUMAN	14.1388	12.1314	13.9392	14.0364	78489	5	sp|Q8IVM0|CCD50_HUMAN	CCD50	Q8IVM0
sp|P56749|CLD12_HUMAN	14.1386	14.0766	12.6927	12.7575	557690	4	sp|P56749|CLD12_HUMAN	CLD12	P56749
sp|Q13561|DCTN2_HUMAN	14.1256	14.3293	13.3113	12.5822	65866	5	sp|Q13561|DCTN2_HUMAN	DCTN2	Q13561
sp|P08670|VIME_HUMAN	14.125	13.3519	15.2749	15.3653	563120	24	sp|P08670|VIME_HUMAN;sp|P41219|PERI_HUMAN;sp|P17661|DESM_HUMAN;sp|Q16352|AINX_HUMAN;sp|P07196|NFL_HUMAN;sp|P07197|NFM_HUMAN	VIME	P08670
sp|Q13907|IDI1_HUMAN	14.1098	13.4409	12.1835	11.3659	99680	4	sp|Q13907|IDI1_HUMAN	IDI1	Q13907
sp|Q86SQ4|AGRG6_HUMAN	14.1073	13.0923	12.7507	13.5509	37568	3	sp|Q86SQ4|AGRG6_HUMAN	AGRG6	Q86SQ4
sp|Q9H6B4|CLMP_HUMAN	14.1035	13.6649	12.9904	13.563	335020	12	sp|Q9H6B4|CLMP_HUMAN	CLMP	Q9H6B4
sp|O60506|HNRPQ_HUMAN	14.1029	12.5452	12.7884	12.7341	44077	3	sp|O60506|HNRPQ_HUMAN	HNRPQ	O60506
sp|Q92598|HS105_HUMAN	14.1016	14.2187	14.6854	14.8605	492470	23	sp|Q92598|HS105_HUMAN	HS105	Q92598
sp|Q8N8S7|ENAH_HUMAN	14.101	12.6034	14.722	14.6878	156430	8	sp|Q8N8S7|ENAH_HUMAN	ENAH	Q8N8S7
sp|P51178|PLCD1_HUMAN	14.0945	12.8498	11.7437	12.9448	29203	2	sp|P51178|PLCD1_HUMAN	PLCD1	P51178
sp|Q9UHY7|ENOPH_HUMAN	14.0855	13.5122	13.5158	13.4474	22400	2	sp|Q9UHY7|ENOPH_HUMAN	ENOPH	Q9UHY7
sp|Q9UDY2|ZO2_HUMAN	14.0841	12.8961	12.0993	13.1773	27996	4	sp|Q9UDY2|ZO2_HUMAN	ZO2	Q9UDY2
sp|O14980|XPO1_HUMAN	14.0722	12.7464	13.3066	12.1251	5525.8	2	sp|O14980|XPO1_HUMAN	XPO1	O14980
sp|Q8IX04|UEVLD_HUMAN	14.0717	13.7467	14.5391	15.998	643270	23	sp|Q8IX04|UEVLD_HUMAN	UEVLD	Q8IX04
sp|P52566|GDIR2_HUMAN	14.0644	13.3161	13.2441	12.7985	319230	4	sp|P52566|GDIR2_HUMAN	GDIR2	P52566
sp|Q92536|YLAT2_HUMAN	14.063	13.4732	12.455	12.5552	30297	2	sp|Q92536|YLAT2_HUMAN	YLAT2	Q92536
sp|Q9NRM0|GTR9_HUMAN	14.0629	12.5355	16.1	16.1596	380580	6	sp|Q9NRM0|GTR9_HUMAN	GTR9	Q9NRM0
sp|P17066|HSP76_HUMAN;sp|P48741|HSP77_HUMAN	14.0555	13.215	13.7095	12.7626	5307200	7	sp|P17066|HSP76_HUMAN;sp|P48741|HSP77_HUMAN	HSP76	P17066
sp|Q9Y6M5|ZNT1_HUMAN	14.049	13.922	17.1723	17.2693	1432000	15	sp|Q9Y6M5|ZNT1_HUMAN	ZNT1	Q9Y6M5
sp|Q8N128|F177A_HUMAN	14.0483	13.4801	13.1105	13.2941	73497	3	sp|Q8N128|F177A_HUMAN	F177A	Q8N128
sp|Q9BZG1|RAB34_HUMAN	14.0476	12.4496	16.0638	16.1377	574610	14	sp|Q9BZG1|RAB34_HUMAN	RAB34	Q9BZG1
sp|Q8IXU6|S35F2_HUMAN	14.0428	12.6208	15.5764	15.8952	208680	7	sp|Q8IXU6|S35F2_HUMAN	S35F2	Q8IXU6
sp|Q13444|ADA15_HUMAN	14.0362	13.3237	15.1423	15.6124	253090	9	sp|Q13444|ADA15_HUMAN	ADA15	Q13444
sp|Q9P273|TEN3_HUMAN	14.0333	12.2842	15.1908	15.5345	520670	20	sp|Q9P273|TEN3_HUMAN	TEN3	Q9P273
sp|O15431|COPT1_HUMAN	14.0313	14.8709	12.6054	13.1703	1989900	9	sp|O15431|COPT1_HUMAN	COPT1	O15431
sp|Q96M27|PRRC1_HUMAN	14.0272	13.3492	13.2986	12.8591	8977.2	1	sp|Q96M27|PRRC1_HUMAN	PRRC1	Q96M27
sp|P0CG12|DERPC_HUMAN	14.0261	12.7394	11.7719	13.2298	21229	1	sp|P0CG12|DERPC_HUMAN	DERPC	P0CG12
sp|P52888|THOP1_HUMAN	14.0101	12.9269	12.9834	12.1915	15179	3	sp|P52888|THOP1_HUMAN	THOP1	P52888
sp|O00303|EIF3F_HUMAN	14.0094	12.87	14.4161	14.5101	121720	5	sp|O00303|EIF3F_HUMAN	EIF3F	O00303
sp|O60749|SNX2_HUMAN;sp|Q13596|SNX1_HUMAN	14.0054	12.4639	13.5701	13.6392	114830	8	sp|O60749|SNX2_HUMAN;sp|Q13596|SNX1_HUMAN	SNX2	O60749
sp|Q9UGV2|NDRG3_HUMAN	13.9969	13.0031	16.2271	16.415	316610	6	sp|Q9UGV2|NDRG3_HUMAN	NDRG3	Q9UGV2
sp|Q562R1|ACTBL_HUMAN	13.994	12.3154	13.795	12.043	16931	1	sp|Q562R1|ACTBL_HUMAN	ACTBL	Q562R1
sp|Q96BI3|APH1A_HUMAN	13.979	13.0941	13.6593	12.8721	67395	2	sp|Q96BI3|APH1A_HUMAN	APH1A	Q96BI3
sp|P52594|AGFG1_HUMAN	13.9787	13.9172	14.0538	12.9345	87638	7	sp|P52594|AGFG1_HUMAN	AGFG1	P52594
sp|P32856|STX2_HUMAN	13.9772	12.8779	13.5146	13.559	83955	7	sp|P32856|STX2_HUMAN	STX2	P32856
sp|P68036|UB2L3_HUMAN	13.9752	14.7947	14.5066	14.6854	223610	11	sp|P68036|UB2L3_HUMAN;sp|A0A1B0GUS4|UB2L5_HUMAN	UB2L3	P68036
sp|P62269|RS18_HUMAN	13.9724	14.1386	14.8679	14.9992	354650	13	sp|P62269|RS18_HUMAN	RS18	P62269
sp|P06730|IF4E_HUMAN	13.9703	13.8055	14.178	14.1658	113950	6	sp|P06730|IF4E_HUMAN	IF4E	P06730
sp|P18124|RL7_HUMAN	13.9697	13.5171	11.7211	13.6018	48123	2	sp|P18124|RL7_HUMAN	RL7	P18124
sp|Q93045|STMN2_HUMAN	13.9679	13.6776	13.1159	12.8211	233700	3	sp|Q93045|STMN2_HUMAN	STMN2	Q93045
sp|P13798|ACPH_HUMAN	13.9637	13.5872	12.1145	12.9655	80372	4	sp|P13798|ACPH_HUMAN	ACPH	P13798
sp|Q7Z403|TMC6_HUMAN	13.9624	14.2145	14.4741	14.4724	293710	14	sp|Q7Z403|TMC6_HUMAN	TMC6	Q7Z403
sp|P02792|FRIL_HUMAN	13.9527	13.0884	12.8132	12.0214	34633	2	sp|P02792|FRIL_HUMAN	FRIL	P02792
sp|Q9UPY5|XCT_HUMAN	13.9456	13.3218	14.3499	13.838	86751	4	sp|Q9UPY5|XCT_HUMAN	XCT	Q9UPY5
sp|Q9Y5Y0|FLVC1_HUMAN	13.942	14.2854	15.3938	15.4773	505400	17	sp|Q9Y5Y0|FLVC1_HUMAN	FLVC1	Q9Y5Y0
sp|Q08722|CD47_HUMAN	13.937	13.0394	18.1634	18.1736	1960100	10	sp|Q08722|CD47_HUMAN	CD47	Q08722
sp|Q7Z2W4|ZCCHV_HUMAN	13.9346	12.9987	14.4188	14.7022	347860	18	sp|Q7Z2W4|ZCCHV_HUMAN	ZCCHV	Q7Z2W4
sp|O43768|ENSA_HUMAN	13.9296	14.3165	12.3033	12.5612	80668	4	sp|O43768|ENSA_HUMAN;sp|P56211|ARP19_HUMAN	ENSA	O43768
sp|Q96PU5|NED4L_HUMAN	13.9267	13.0708	15.9761	16.1542	860630	19	sp|Q96PU5|NED4L_HUMAN	NED4L	Q96PU5
sp|A8MYB1|TMC5B_HUMAN	13.9251	13.0186	12.11	11.8834	121070	2	sp|A8MYB1|TMC5B_HUMAN	TMC5B	A8MYB1
sp|P31943|HNRH1_HUMAN;sp|P52597|HNRPF_HUMAN;sp|P55795|HNRH2_HUMAN	13.9232	13.8202	13.0119	12.6853	51198	5	sp|P31943|HNRH1_HUMAN;sp|P52597|HNRPF_HUMAN;sp|P55795|HNRH2_HUMAN	HNRH1	P31943
sp|P28908|TNR8_HUMAN	13.9211	12.1147	12.091	13.1808	542630	5	sp|P28908|TNR8_HUMAN	TNR8	P28908
sp|P46531|NOTC1_HUMAN	13.9162	12.2117	15.9202	15.8872	985490	21	sp|P46531|NOTC1_HUMAN;sp|Q9UM47|NOTC3_HUMAN	NOTC1	P46531
sp|Q9NQX7|ITM2C_HUMAN	13.9074	13.4526	13.0421	12.693	99850	2	sp|Q9NQX7|ITM2C_HUMAN	ITM2C	Q9NQX7
sp|P25815|S100P_HUMAN	13.8978	13.5149	12.5584	13.0871	48029	4	sp|P25815|S100P_HUMAN	S100P	P25815
sp|Q15365|PCBP1_HUMAN	13.896	12.5083	13.2448	12.6992	188880	4	sp|Q15365|PCBP1_HUMAN;sp|P57721|PCBP3_HUMAN	PCBP1	Q15365
sp|Q9HAB3|S52A2_HUMAN	13.8876	12.3327	11.6674	12.8419	106450	2	sp|Q9HAB3|S52A2_HUMAN	S52A2	Q9HAB3
sp|Q9H8M9|EVA1A_HUMAN	13.8858	13.2761	12.9541	13.0439	196960	4	sp|Q9H8M9|EVA1A_HUMAN	EVA1A	Q9H8M9
sp|Q53TN4|CYBR1_HUMAN	13.8818	12.4888	13.8267	12.9771	277140	5	sp|Q53TN4|CYBR1_HUMAN	CYBR1	Q53TN4
sp|Q9H910|JUPI2_HUMAN	13.8787	12.9344	15.6754	15.8352	313500	7	sp|Q9H910|JUPI2_HUMAN	JUPI2	Q9H910
sp|Q9NY33|DPP3_HUMAN	13.8768	12.441	12.9257	12.9868	15558	2	sp|Q9NY33|DPP3_HUMAN	DPP3	Q9NY33
sp|P04216|THY1_HUMAN	13.873	13.2829	16.5063	16.7313	564050	4	sp|P04216|THY1_HUMAN	THY1	P04216
sp|Q58FF8|H90B2_HUMAN	13.871	11.6477	16.7599	16.2415	352700	6	sp|Q58FF8|H90B2_HUMAN	H90B2	Q58FF8
sp|P54289|CA2D1_HUMAN	13.8696	12.5154	12.8016	13.0524	33014	3	sp|P54289|CA2D1_HUMAN	CA2D1	P54289
sp|Q9Y6M0|TEST_HUMAN	13.8553	13.6738	15.6987	15.9995	299250	6	sp|Q9Y6M0|TEST_HUMAN	TEST	Q9Y6M0
sp|Q9BW04|SARG_HUMAN	13.8511	13.498	12.5579	12.7165	48671	5	sp|Q9BW04|SARG_HUMAN	SARG	Q9BW04
sp|Q14195|DPYL3_HUMAN	13.8502	12.6686	14.5533	14.8205	186430	8	sp|Q14195|DPYL3_HUMAN	DPYL3	Q14195
sp|Q14644|RASA3_HUMAN	13.8471	13.392	12.9453	12.5179	36063	2	sp|Q14644|RASA3_HUMAN	RASA3	Q14644
sp|Q9BUT1|BDH2_HUMAN	13.8445	13.4507	13.1905	11.7423	21974	2	sp|Q9BUT1|BDH2_HUMAN	BDH2	Q9BUT1
sp|Q15102|PA1B3_HUMAN	13.8431	12.4397	12.6454	11.8241	57966	3	sp|Q15102|PA1B3_HUMAN	PA1B3	Q15102
sp|Q99471|PFD5_HUMAN	13.8378	12.5101	13.6217	12.5993	73398	7	sp|Q99471|PFD5_HUMAN	PFD5	Q99471
sp|P62424|RL7A_HUMAN	13.8373	12.9107	11.5851	11.8072	38552	2	sp|P62424|RL7A_HUMAN	RL7A	P62424
sp|P67809|YBOX1_HUMAN;sp|Q9Y2T7|YBOX2_HUMAN;sp|P16989|YBOX3_HUMAN	13.8371	13.0127	12.9814	12.2157	40624	2	sp|P67809|YBOX1_HUMAN;sp|Q9Y2T7|YBOX2_HUMAN;sp|P16989|YBOX3_HUMAN	YBOX1	P67809
sp|P42771|CDN2A_HUMAN	13.8354	13.4047	13.4235	14.1373	154540	11	sp|P42771|CDN2A_HUMAN;sp|P42772|CDN2B_HUMAN	CDN2A	P42771
sp|P40189|IL6RB_HUMAN	13.8337	13.7322	12.7319	12.2937	6751.2	1	sp|P40189|IL6RB_HUMAN	IL6RB	P40189
sp|P55290|CAD13_HUMAN	13.8307	13.0955	16.3113	16.5085	368540	7	sp|P55290|CAD13_HUMAN	CAD13	P55290
sp|O60869|EDF1_HUMAN	13.8193	13.2285	12.5672	12.7353	109100	4	sp|O60869|EDF1_HUMAN	EDF1	O60869
sp|O15439|MRP4_HUMAN	13.8165	13.2772	13.89	14.4025	262680	16	sp|O15439|MRP4_HUMAN	MRP4	O15439
sp|Q8IYT4|KATL2_HUMAN	13.81	14.1624	13.0411	12.3134	49150	1	sp|Q8IYT4|KATL2_HUMAN	KATL2	Q8IYT4
sp|Q7Z402|TMC7_HUMAN	13.8075	13.4781	15.2089	15.5324	427610	17	sp|Q7Z402|TMC7_HUMAN	TMC7	Q7Z402
sp|P49327|FAS_HUMAN	13.8073	13.3981	15.6574	15.7189	1507900	52	sp|P49327|FAS_HUMAN	FAS	P49327
sp|P08069|IGF1R_HUMAN	13.8067	13.4902	13.4597	12.4728	87040	5	sp|P08069|IGF1R_HUMAN	IGF1R	P08069
sp|O15145|ARPC3_HUMAN	13.7989	13.4224	14.5167	14.7309	107770	4	sp|O15145|ARPC3_HUMAN	ARPC3	O15145
sp|Q9NPH3|IL1AP_HUMAN	13.7984	12.821	14.7078	15.0941	234800	10	sp|Q9NPH3|IL1AP_HUMAN	IL1AP	Q9NPH3
sp|Q86W92|LIPB1_HUMAN	13.7972	13.4745	13.2436	12.9194	1971.7	1	sp|Q86W92|LIPB1_HUMAN	LIPB1	Q86W92
sp|P07954|FUMH_HUMAN	13.795	13.5546	13.6726	12.1807	40888	3	sp|P07954|FUMH_HUMAN	FUMH	P07954
sp|Q9H4G0|E41L1_HUMAN	13.7941	13.463	14.4547	14.6119	153480	6	sp|Q9H4G0|E41L1_HUMAN	E41L1	Q9H4G0
sp|Q86T03|PP4P1_HUMAN	13.794	12.8318	13.1903	13.1193	79172	5	sp|Q86T03|PP4P1_HUMAN	PP4P1	Q86T03
sp|Q9NVZ3|NECP2_HUMAN	13.789	13.553	12.9685	12.3944	51744	2	sp|Q9NVZ3|NECP2_HUMAN	NECP2	Q9NVZ3
sp|P00390|GSHR_HUMAN	13.7889	13.1753	12.2744	12.6904	5413.6	1	sp|P00390|GSHR_HUMAN	GSHR	P00390
sp|P0DJI8|SAA1_HUMAN;sp|P0DJI9|SAA2_HUMAN	13.7722	14.0283	12.7361	12.2415	50201	4	sp|P0DJI8|SAA1_HUMAN;sp|P0DJI9|SAA2_HUMAN	SAA1	P0DJI8
sp|Q13530|SERC3_HUMAN	13.7717	12.9184	14.2346	13.7679	113120	6	sp|Q13530|SERC3_HUMAN	SERC3	Q13530
sp|P53602|MVD1_HUMAN	13.7714	12.7719	13.0988	11.6903	22355	2	sp|P53602|MVD1_HUMAN	MVD1	P53602
sp|Q92734|TFG_HUMAN	13.7694	12.5933	12.9958	13.5628	512000	7	sp|Q92734|TFG_HUMAN	TFG	Q92734
sp|P55263|ADK_HUMAN	13.7651	13.7438	13.37	12.7169	103070	11	sp|P55263|ADK_HUMAN	ADK	P55263
sp|P51636|CAV2_HUMAN	13.7636	12.5554	13.4706	12.6241	225100	4	sp|P51636|CAV2_HUMAN	CAV2	P51636
sp|Q92982|NINJ1_HUMAN	13.7613	12.5783	14.5605	14.6379	139930	6	sp|Q92982|NINJ1_HUMAN	NINJ1	Q92982
sp|Q8WV41|SNX33_HUMAN	13.7599	13.6109	16.7009	16.5438	1326800	37	sp|Q8WV41|SNX33_HUMAN	SNX33	Q8WV41
sp|Q96D31|CRCM1_HUMAN	13.7542	12.7714	12.5918	12.5572	20457	2	sp|Q96D31|CRCM1_HUMAN	CRCM1	Q96D31
sp|P11586|C1TC_HUMAN	13.7457	12.2333	14.4871	14.7159	502910	20	sp|P11586|C1TC_HUMAN	C1TC	P11586
sp|Q9UNZ2|NSF1C_HUMAN	13.7456	13.638	12.2903	12.7862	124300	9	sp|Q9UNZ2|NSF1C_HUMAN	NSF1C	Q9UNZ2
sp|Q7KZI7|MARK2_HUMAN;sp|P27448|MARK3_HUMAN	13.7356	13.3041	12.4663	12.7768	87591	6	sp|Q7KZI7|MARK2_HUMAN;sp|P27448|MARK3_HUMAN;sp|Q96L34|MARK4_HUMAN;sp|Q9P0L2|MARK1_HUMAN	MARK2	Q7KZI7
sp|Q99959|PKP2_HUMAN	13.731	13.8394	16.8814	16.7488	1598200	39	sp|Q99959|PKP2_HUMAN	PKP2	Q99959
sp|Q9ULV4|COR1C_HUMAN	13.7232	14.3562	12.0577	12.9104	27127	2	sp|Q9ULV4|COR1C_HUMAN	COR1C	Q9ULV4
sp|Q96QK1|VPS35_HUMAN	13.7223	13.8605	14.9142	14.9135	485750	26	sp|Q96QK1|VPS35_HUMAN	VPS35	Q96QK1
sp|P61024|CKS1_HUMAN;sp|P33552|CKS2_HUMAN	13.722	13.2067	12.8977	13.0802	16956	2	sp|P61024|CKS1_HUMAN;sp|P33552|CKS2_HUMAN	CKS1	P61024
sp|P51159|RB27A_HUMAN	13.7204	13.1653	14.3563	14.7707	183250	8	sp|P51159|RB27A_HUMAN;sp|O00194|RB27B_HUMAN	RB27A	P51159
sp|P02008|HBAZ_HUMAN	13.72	13.512	12.4738	13.3599	19261	1	sp|P02008|HBAZ_HUMAN	HBAZ	P02008
sp|P05156|CFAI_HUMAN	13.716	13.3934	15.589	15.7653	304510	7	sp|P05156|CFAI_HUMAN	CFAI	P05156
sp|Q15382|RHEB_HUMAN	13.7119	13.3984	12.5821	12.3976	153250	6	sp|Q15382|RHEB_HUMAN	RHEB	Q15382
sp|O60488|ACSL4_HUMAN	13.7097	13.0751	15.6442	15.4267	575700	18	sp|O60488|ACSL4_HUMAN;sp|O95573|ACSL3_HUMAN	ACSL4	O60488
sp|O00244|ATOX1_HUMAN	13.7064	12.8063	13.1187	12.7941	92816	1	sp|O00244|ATOX1_HUMAN	ATOX1	O00244
sp|Q8TAF3|WDR48_HUMAN	13.7064	13.7532	13.5742	13.2604	14362	3	sp|Q8TAF3|WDR48_HUMAN	WDR48	Q8TAF3
sp|Q9ULZ3|ASC_HUMAN	13.7024	13.5682	12.5473	11.3847	72237	7	sp|Q9ULZ3|ASC_HUMAN	ASC	Q9ULZ3
sp|Q9UNE7|CHIP_HUMAN	13.6971	12.4382	12.7007	13.018	154220	6	sp|Q9UNE7|CHIP_HUMAN	CHIP	Q9UNE7
sp|Q9Y262|EIF3L_HUMAN	13.689	12.638	12.5058	12.1768	10680	1	sp|Q9Y262|EIF3L_HUMAN	EIF3L	Q9Y262
sp|O75821|EIF3G_HUMAN	13.6834	14.3641	12.6531	13.2173	67676	2	sp|O75821|EIF3G_HUMAN	EIF3G	O75821
sp|P00751|CFAB_HUMAN	13.6822	12.8352	12.9204	13.0704	49731	2	sp|P00751|CFAB_HUMAN	CFAB	P00751
sp|P49795|RGS19_HUMAN	13.6801	12.2715	12.9147	12.6707	40807	2	sp|P49795|RGS19_HUMAN	RGS19	P49795
sp|Q15046|SYK_HUMAN	13.6797	12.857	14.4472	13.8448	75581	4	sp|Q15046|SYK_HUMAN	SYK	Q15046
sp|Q8WWB7|GLMP_HUMAN	13.6786	12.6073	12.6274	12.3943	10711	1	sp|Q8WWB7|GLMP_HUMAN	GLMP	Q8WWB7
sp|P61970|NTF2_HUMAN	13.6778	12.4484	13.381	12.723	184080	4	sp|P61970|NTF2_HUMAN	NTF2	P61970
sp|Q9NQC3|RTN4_HUMAN	13.6752	13.0506	12.5997	13.1406	126110	3	sp|Q9NQC3|RTN4_HUMAN	RTN4	Q9NQC3
sp|P11413|G6PD_HUMAN	13.6748	12.3958	11.9543	12.1844	121640	8	sp|P11413|G6PD_HUMAN	G6PD	P11413
sp|Q8IVF2|AHNK2_HUMAN	13.6736	12.9642	14.6569	14.7885	152390	6	sp|Q8IVF2|AHNK2_HUMAN	AHNK2	Q8IVF2
sp|P61764|STXB1_HUMAN	13.6722	13.9176	14.0405	14.6243	238760	13	sp|P61764|STXB1_HUMAN	STXB1	P61764
sp|O00764|PDXK_HUMAN	13.6677	13.1495	12.5376	12.0723	44327	3	sp|O00764|PDXK_HUMAN	PDXK	O00764
sp|Q86VP6|CAND1_HUMAN	13.6659	14.2475	14.889	15.0184	462020	21	sp|Q86VP6|CAND1_HUMAN	CAND1	Q86VP6
sp|O94804|STK10_HUMAN	13.6641	12.8948	13.8542	14.0937	81628	6	sp|O94804|STK10_HUMAN	STK10	O94804
sp|O43493|TGON2_HUMAN	13.6637	12.5058	12.7104	13.3373	29658	1	sp|O43493|TGON2_HUMAN	TGON2	O43493
sp|O75822|EIF3J_HUMAN	13.6563	13.8187	11.7437	13.0268	179460	6	sp|O75822|EIF3J_HUMAN	EIF3J	O75822
sp|Q9NR12|PDLI7_HUMAN	13.6517	13.2187	14.3597	14.4516	151580	7	sp|Q9NR12|PDLI7_HUMAN	PDLI7	Q9NR12
sp|O43583|DENR_HUMAN	13.6426	13.2034	13.2766	12.3478	25841	3	sp|O43583|DENR_HUMAN	DENR	O43583
sp|A1X283|SPD2B_HUMAN	13.6417	13.0665	12.7988	11.854	31743	3	sp|A1X283|SPD2B_HUMAN	SPD2B	A1X283
sp|Q7L7X3|TAOK1_HUMAN	13.6385	13.9561	14.848	14.878	178460	10	sp|Q7L7X3|TAOK1_HUMAN;sp|Q9UL54|TAOK2_HUMAN	TAOK1	Q7L7X3
sp|O00220|TR10A_HUMAN	13.6353	13.3688	16.2463	16.1337	621370	16	sp|O00220|TR10A_HUMAN	TR10A	O00220
sp|Q9Y3C5|RNF11_HUMAN	13.6316	12.6008	11.9324	13.6262	6633.8	1	sp|Q9Y3C5|RNF11_HUMAN	RNF11	Q9Y3C5
sp|Q15843|NEDD8_HUMAN	13.6278	13.7411	14.1313	12.2226	326250	3	sp|Q15843|NEDD8_HUMAN	NEDD8	Q15843
sp|P56645|PER3_HUMAN	13.6273	13.0722	12.5644	12.5519	23578	1	sp|P56645|PER3_HUMAN	PER3	P56645
sp|P55786|PSA_HUMAN;sp|A6NEC2|PSAL_HUMAN	13.627	12.696	13.9491	14.4491	171550	11	sp|P55786|PSA_HUMAN;sp|A6NEC2|PSAL_HUMAN	PSA	P55786
sp|P62304|RUXE_HUMAN	13.6217	12.1105	12.2317	12.3606	100410	5	sp|P62304|RUXE_HUMAN	RUXE	P62304
sp|O94887|FARP2_HUMAN	13.6199	13.5027	12.8803	13.0593	71979	4	sp|O94887|FARP2_HUMAN	FARP2	O94887
sp|Q9Y5X1|SNX9_HUMAN	13.6192	13.6636	12.8351	13.4363	81330	7	sp|Q9Y5X1|SNX9_HUMAN	SNX9	Q9Y5X1
sp|P01130|LDLR_HUMAN	13.6166	12.9612	16.0006	15.6674	278650	9	sp|P01130|LDLR_HUMAN	LDLR	P01130
sp|Q6RW13|ATRAP_HUMAN	13.6124	11.7355	11.902	12.1162	29571	2	sp|Q6RW13|ATRAP_HUMAN	ATRAP	Q6RW13
sp|P35030|TRY3_HUMAN	13.6097	12.9375	11.757	13.2333	8916400	13	sp|P35030|TRY3_HUMAN	TRY3	P35030
sp|O43194|GPR39_HUMAN	13.6064	13.0137	12.8615	13.6998	17539	1	sp|O43194|GPR39_HUMAN	GPR39	O43194
sp|Q6UXG2|ELAP1_HUMAN	13.6018	13.6588	12.2548	12.3746	16944	1	sp|Q6UXG2|ELAP1_HUMAN	ELAP1	Q6UXG2
sp|Q99460|PSMD1_HUMAN	13.6014	11.8696	12.6723	12.1182	16290	2	sp|Q99460|PSMD1_HUMAN	PSMD1	Q99460
sp|P00918|CAH2_HUMAN	13.6008	13.1491	12.6887	11.8583	75684	6	sp|P00918|CAH2_HUMAN	CAH2	P00918
sp|Q9H3Z4|DNJC5_HUMAN	13.5966	12.7634	17.3127	17.4875	925990	11	sp|Q9H3Z4|DNJC5_HUMAN	DNJC5	Q9H3Z4
sp|P05091|ALDH2_HUMAN	13.5951	12.7925	12.8774	12.5052	16116	2	sp|P05091|ALDH2_HUMAN	ALDH2	P05091
sp|P38646|GRP75_HUMAN	13.5936	13.1984	15.547	15.8898	732730	25	sp|P38646|GRP75_HUMAN	GRP75	P38646
sp|Q8TAD7|OCC1_HUMAN	13.592	13.4026	13.2408	12.7006	181260	6	sp|Q8TAD7|OCC1_HUMAN	OCC1	Q8TAD7
sp|Q15025|TNIP1_HUMAN	13.5889	12.7794	14.1545	14.2075	139480	7	sp|Q15025|TNIP1_HUMAN	TNIP1	Q15025
sp|P17900|SAP3_HUMAN	13.5881	12.7007	12.6246	12.7005	100180	3	sp|P17900|SAP3_HUMAN	SAP3	P17900
sp|Q9H0M0|WWP1_HUMAN	13.5841	13.4771	13.9198	14.1575	206190	12	sp|Q9H0M0|WWP1_HUMAN	WWP1	Q9H0M0
sp|P13637|AT1A3_HUMAN	13.5834	13.1817	14.6294	14.9632	148990	4	sp|P13637|AT1A3_HUMAN	AT1A3	P13637
sp|Q00688|FKBP3_HUMAN	13.5827	14.0091	12.9678	13.2434	36245	3	sp|Q00688|FKBP3_HUMAN	FKBP3	Q00688
sp|P10645|CMGA_HUMAN	13.582	12.4205	12.5027	14.0719	372430	4	sp|P10645|CMGA_HUMAN	CMGA	P10645
sp|Q8IUW5|RELL1_HUMAN	13.5764	11.6116	13.5863	12.2824	22622	1	sp|Q8IUW5|RELL1_HUMAN	RELL1	Q8IUW5
sp|Q9BQL6|FERM1_HUMAN	13.5738	13.2312	17.0545	17.1052	2272100	48	sp|Q9BQL6|FERM1_HUMAN	FERM1	Q9BQL6
sp|P46781|RS9_HUMAN	13.5729	12.6973	12.2361	11.8162	52762	3	sp|P46781|RS9_HUMAN	RS9	P46781
sp|Q7Z7H5|TMED4_HUMAN	13.5712	12.8955	12.5718	13.0748	79001	3	sp|Q7Z7H5|TMED4_HUMAN	TMED4	Q7Z7H5
sp|Q03989|ARI5A_HUMAN	13.5711	13.2507	11.6498	11.8767	485700	1	sp|Q03989|ARI5A_HUMAN	ARI5A	Q03989
sp|O43169|CYB5B_HUMAN	13.5691	13.2654	12.388	12.8021	36839	3	sp|O43169|CYB5B_HUMAN	CYB5B	O43169
sp|P78539|SRPX_HUMAN	13.5682	12.463	12.5481	11.622	7537.3	1	sp|P78539|SRPX_HUMAN	SRPX	P78539
sp|P31939|PUR9_HUMAN	13.5642	12.5284	14.9376	14.8769	563460	21	sp|P31939|PUR9_HUMAN	PUR9	P31939
sp|O75882|ATRN_HUMAN	13.5622	12.6807	12.614	12.4	53159	2	sp|O75882|ATRN_HUMAN	ATRN	O75882
sp|P60709|ACTB_HUMAN	13.5617	12.4669	12.7328	13.0905	182830	5	sp|P60709|ACTB_HUMAN;sp|Q6S8J3|POTEE_HUMAN;sp|A5A3E0|POTEF_HUMAN;sp|P0CG38|POTEI_HUMAN;sp|Q9BYX7|ACTBM_HUMAN;sp|P0CG39|POTEJ_HUMAN	ACTB	P60709
sp|Q9BXS4|TMM59_HUMAN	13.5594	12.3953	13.1069	13.0342	19681	2	sp|Q9BXS4|TMM59_HUMAN	TMM59	Q9BXS4
sp|P20336|RAB3A_HUMAN	13.5586	12.4317	13.8408	12.6412	137840	7	sp|P20336|RAB3A_HUMAN	RAB3A	P20336
sp|O14907|TX1B3_HUMAN	13.558	13.7014	12.8253	13.2051	412710	5	sp|O14907|TX1B3_HUMAN	TX1B3	O14907
sp|Q14542|S29A2_HUMAN	13.5565	12.5998	16.2315	16.3046	524130	8	sp|Q14542|S29A2_HUMAN	S29A2	Q14542
sp|P32970|CD70_HUMAN	13.5564	12.7805	14.2413	14.4695	88815	5	sp|P32970|CD70_HUMAN	CD70	P32970
sp|Q9UBP0|SPAST_HUMAN	13.5548	12.7737	12.5607	13.1175	48995	3	sp|Q9UBP0|SPAST_HUMAN	SPAST	Q9UBP0
sp|P68366|TBA4A_HUMAN	13.551	14.2737	14.3687	14.1337	100740	5	sp|P68366|TBA4A_HUMAN	TBA4A	P68366
sp|P22314|UBA1_HUMAN	13.549	12.1097	14.6794	14.3389	191870	10	sp|P22314|UBA1_HUMAN	UBA1	P22314
sp|P05198|IF2A_HUMAN	13.5401	13.3954	13.9516	13.9066	184860	13	sp|P05198|IF2A_HUMAN	IF2A	P05198
sp|P08865|RSSA_HUMAN	13.5353	14.0847	15.4574	15.2792	272280	10	sp|P08865|RSSA_HUMAN	RSSA	P08865
sp|Q71UM5|RS27L_HUMAN;sp|P42677|RS27_HUMAN	13.5333	13.4588	13.1584	13.2934	29390	1	sp|Q71UM5|RS27L_HUMAN;sp|P42677|RS27_HUMAN	RS27L	Q71UM5
sp|O75976|CBPD_HUMAN	13.5316	11.7948	12.0719	12.9278	126810	5	sp|O75976|CBPD_HUMAN	CBPD	O75976
sp|Q0VGL1|LTOR4_HUMAN	13.5311	13.2424	13.2529	12.1688	19509	1	sp|Q0VGL1|LTOR4_HUMAN	LTOR4	Q0VGL1
sp|Q6P9G4|TM154_HUMAN	13.5289	13.4909	17.2302	17.4367	1254200	9	sp|Q6P9G4|TM154_HUMAN	TM154	Q6P9G4
sp|P05120|PAI2_HUMAN	13.5263	12.7967	13.8025	13.6327	112250	7	sp|P05120|PAI2_HUMAN	PAI2	P05120
sp|Q5VT79|AXA81_HUMAN	13.5247	12.6926	12.7407	12.4147	116950	3	sp|Q5VT79|AXA81_HUMAN	AXA81	Q5VT79
sp|Q13541|4EBP1_HUMAN	13.5218	12.828	12.4995	12.9864	40565	1	sp|Q13541|4EBP1_HUMAN	4EBP1	Q13541
sp|O14786|NRP1_HUMAN	13.521	11.3703	14.8598	14.8767	304370	15	sp|O14786|NRP1_HUMAN	NRP1	O14786
sp|Q969T9|WBP2_HUMAN	13.52	13.1706	12.0608	12.5793	90906	4	sp|Q969T9|WBP2_HUMAN	WBP2	Q969T9
sp|Q12768|WASC5_HUMAN	13.5183	13.0319	11.9431	12.5116	6225.8	1	sp|Q12768|WASC5_HUMAN	WASC5	Q12768
sp|Q01813|PFKAP_HUMAN	13.5177	13.0911	13.871	13.9966	192930	13	sp|Q01813|PFKAP_HUMAN	PFKAP	Q01813
sp|C9J7I0|UMAD1_HUMAN	13.5157	12.4356	15.5008	15.5956	212380	7	sp|C9J7I0|UMAD1_HUMAN	UMAD1	C9J7I0
sp|Q9H4A4|AMPB_HUMAN	13.5154	12.7207	13.4091	13.436	9896.6	1	sp|Q9H4A4|AMPB_HUMAN	AMPB	Q9H4A4
sp|P50570|DYN2_HUMAN;sp|Q9UQ16|DYN3_HUMAN	13.5001	12.7048	12.0726	13.1525	24054	3	sp|P50570|DYN2_HUMAN;sp|Q9UQ16|DYN3_HUMAN	DYN2	P50570
sp|Q9H2H8|PPIL3_HUMAN	13.499	12.5451	12.7582	13.2111	74889	7	sp|Q9H2H8|PPIL3_HUMAN	PPIL3	Q9H2H8
sp|Q99829|CPNE1_HUMAN	13.4975	14.2109	11.8311	12.7027	36781	2	sp|Q99829|CPNE1_HUMAN	CPNE1	Q99829
sp|Q14118|DAG1_HUMAN	13.4969	12.8497	16.004	16.2571	405030	9	sp|Q14118|DAG1_HUMAN	DAG1	Q14118
sp|Q8NCW5|NNRE_HUMAN	13.4947	12.927	12.2747	13.8578	6595.8	1	sp|Q8NCW5|NNRE_HUMAN	NNRE	Q8NCW5
sp|P01033|TIMP1_HUMAN	13.488	13.0015	12.8916	13.1955	66299	3	sp|P01033|TIMP1_HUMAN	TIMP1	P01033
sp|Q9Y281|COF2_HUMAN	13.4841	13.2436	13.0375	12.7631	62326	4	sp|Q9Y281|COF2_HUMAN	COF2	Q9Y281
sp|O95164|UBL3_HUMAN	13.4833	13.8885	12.5435	12.0252	168600	5	sp|O95164|UBL3_HUMAN	UBL3	O95164
sp|Q9NUE0|ZDH18_HUMAN	13.4823	13.5922	12.5989	12.9902	13349	1	sp|Q9NUE0|ZDH18_HUMAN	ZDH18	Q9NUE0
sp|Q6IQ22|RAB12_HUMAN	13.4772	12.5574	13.1412	12.8559	23116	1	sp|Q6IQ22|RAB12_HUMAN	RAB12	Q6IQ22
sp|Q15084|PDIA6_HUMAN	13.475	12.7825	12.8986	12.4977	56062	4	sp|Q15084|PDIA6_HUMAN	PDIA6	Q15084
sp|P49757|NUMB_HUMAN	13.4665	13.4266	13.0068	13.722	114140	4	sp|P49757|NUMB_HUMAN	NUMB	P49757
sp|Q9BZQ8|NIBA1_HUMAN	13.4645	12.7947	13.3335	13.8162	52549	4	sp|Q9BZQ8|NIBA1_HUMAN	NIBA1	Q9BZQ8
sp|Q15363|TMED2_HUMAN	13.4638	14.6939	12.3025	12.1615	23781	2	sp|Q15363|TMED2_HUMAN	TMED2	Q15363
sp|Q8NC42|RN149_HUMAN	13.4627	11.9041	13.0327	12.7101	80683	2	sp|Q8NC42|RN149_HUMAN	RN149	Q8NC42
sp|Q92896|GSLG1_HUMAN	13.4599	14.0565	14.6913	14.7921	198380	7	sp|Q92896|GSLG1_HUMAN	GSLG1	Q92896
sp|P01861|IGHG4_HUMAN	13.4589	12.6291	13.7922	12.652	79101	2	sp|P01861|IGHG4_HUMAN	IGHG4	P01861
sp|Q9NRV9|HEBP1_HUMAN	13.4581	14.7905	12.9662	12.986	132510	7	sp|Q9NRV9|HEBP1_HUMAN	HEBP1	Q9NRV9
sp|P29144|TPP2_HUMAN	13.4557	13.7027	15.4702	15.746	1239000	38	sp|P29144|TPP2_HUMAN	TPP2	P29144
sp|P17844|DDX5_HUMAN;sp|Q92841|DDX17_HUMAN	13.4557	12.7377	13.6152	13.1007	18312	1	sp|P17844|DDX5_HUMAN;sp|Q92841|DDX17_HUMAN	DDX5	P17844
sp|P84243|H33_HUMAN	13.4522	13.5459	12.6199	12.5725	28885	2	sp|P84243|H33_HUMAN	H33	P84243
sp|P54578|UBP14_HUMAN	13.4477	13.1285	14.7293	14.9683	153510	6	sp|P54578|UBP14_HUMAN	UBP14	P54578
sp|P05386|RLA1_HUMAN	13.4411	13.7492	12.8045	11.584	291770	4	sp|P05386|RLA1_HUMAN	RLA1	P05386
sp|Q96HC4|PDLI5_HUMAN	13.4399	13.0672	12.7286	13.1611	7414.9	1	sp|Q96HC4|PDLI5_HUMAN	PDLI5	Q96HC4
sp|Q9Y666|S12A7_HUMAN	13.4387	12.8235	13.0172	12.2019	64874	3	sp|Q9Y666|S12A7_HUMAN	S12A7	Q9Y666
sp|Q8NAX2|KDF1_HUMAN	13.4384	13.2703	11.9644	11.7233	72118	3	sp|Q8NAX2|KDF1_HUMAN	KDF1	Q8NAX2
sp|P55957|BID_HUMAN	13.4368	13.1112	12.8599	12.8346	34459	2	sp|P55957|BID_HUMAN	BID	P55957
sp|P62263|RS14_HUMAN	13.4333	11.9327	11.9646	11.5864	55949	2	sp|P62263|RS14_HUMAN	RS14	P62263
sp|Q92738|US6NL_HUMAN	13.433	12.5756	11.8428	12.5776	11732	2	sp|Q92738|US6NL_HUMAN	US6NL	Q92738
sp|Q14160|SCRIB_HUMAN	13.4304	13.0275	14.6392	14.9543	422220	17	sp|Q14160|SCRIB_HUMAN	SCRIB	Q14160
sp|Q9H0N0|RAB6C_HUMAN;sp|Q53S08|RAB6D_HUMAN	13.426	13.1134	12.8943	12.849	27317	1	sp|Q9H0N0|RAB6C_HUMAN;sp|Q53S08|RAB6D_HUMAN	RAB6C	Q9H0N0
sp|P34897|GLYM_HUMAN	13.4253	12.7121	13.0138	12.6828	59582	3	sp|P34897|GLYM_HUMAN	GLYM	P34897
sp|Q6PJF5|RHDF2_HUMAN	13.4241	13.4072	12.3279	13.8849	46069	2	sp|Q6PJF5|RHDF2_HUMAN	RHDF2	Q6PJF5
sp|P13010|XRCC5_HUMAN	13.4238	13.4191	13.7243	12.2049	107700	5	sp|P13010|XRCC5_HUMAN	XRCC5	P13010
sp|P39019|RS19_HUMAN	13.423	12.8894	13.1295	12.6574	154180	7	sp|P39019|RS19_HUMAN	RS19	P39019
sp|Q9NRX4|PHP14_HUMAN	13.4225	12.9064	11.8461	12.9231	19909	2	sp|Q9NRX4|PHP14_HUMAN	PHP14	Q9NRX4
sp|Q9ULC4|MCTS1_HUMAN	13.4211	12.9683	12.2928	13.9543	87756	4	sp|Q9ULC4|MCTS1_HUMAN	MCTS1	Q9ULC4
sp|Q53RY4|KCP3_HUMAN	13.4201	12.2526	12.0757	13.5183	29719	2	sp|Q53RY4|KCP3_HUMAN	KCP3	Q53RY4
sp|Q96AE4|FUBP1_HUMAN	13.4184	13.6594	12.3764	13.6703	68875	5	sp|Q96AE4|FUBP1_HUMAN	FUBP1	Q96AE4
sp|O15305|PMM2_HUMAN	13.4167	12.9125	12.6845	12.7997	50185	2	sp|O15305|PMM2_HUMAN	PMM2	O15305
sp|Q99627|CSN8_HUMAN	13.4151	12.3941	13.2995	13.342	14081	2	sp|Q99627|CSN8_HUMAN	CSN8	Q99627
sp|Q15517|CDSN_HUMAN	13.4148	12.7312	12.7298	12.9611	20627	2	sp|Q15517|CDSN_HUMAN	CDSN	Q15517
sp|Q8N3E9|PLCD3_HUMAN	13.4114	11.6589	12.0877	13.4417	25026	2	sp|Q8N3E9|PLCD3_HUMAN	PLCD3	Q8N3E9
sp|P07384|CAN1_HUMAN	13.4105	13.1581	14.1628	14.308	198540	11	sp|P07384|CAN1_HUMAN	CAN1	P07384
sp|Q96RD7|PANX1_HUMAN	13.4096	13.7334	12.977	13.1962	43182	4	sp|Q96RD7|PANX1_HUMAN	PANX1	Q96RD7
sp|Q9NSA3|CNBP1_HUMAN	13.4082	12.1073	11.59	13.7837	6874.1	1	sp|Q9NSA3|CNBP1_HUMAN	CNBP1	Q9NSA3
sp|Q12974|TP4A2_HUMAN	13.407	12.5107	11.8219	12.8658	23790	2	sp|Q12974|TP4A2_HUMAN	TP4A2	Q12974
sp|P04632|CPNS1_HUMAN	13.4057	12.9318	12.6009	12.1685	137000	12	sp|P04632|CPNS1_HUMAN;sp|Q96L46|CPNS2_HUMAN	CPNS1	P04632
sp|Q15012|LAP4A_HUMAN	13.4021	13.6539	13.055	12.2634	11760	1	sp|Q15012|LAP4A_HUMAN	LAP4A	Q15012
sp|P30679|GNA15_HUMAN	13.4016	13.6333	13.0437	13.1796	88946	3	sp|P30679|GNA15_HUMAN	GNA15	P30679
sp|Q9Y5L3|ENTP2_HUMAN	13.3914	12.791	14.6564	14.6863	175700	7	sp|Q9Y5L3|ENTP2_HUMAN	ENTP2	Q9Y5L3
sp|O75886|STAM2_HUMAN	13.3877	12.7567	15.426	15.6447	580490	16	sp|O75886|STAM2_HUMAN	STAM2	O75886
sp|Q99873|ANM1_HUMAN	13.3877	12.7136	14.3425	14.4569	104700	6	sp|Q99873|ANM1_HUMAN	ANM1	Q99873
sp|P26639|SYTC_HUMAN	13.3866	13.8114	15.0299	15.3172	653670	23	sp|P26639|SYTC_HUMAN;sp|A2RTX5|SYTC2_HUMAN	SYTC	P26639
sp|O14979|HNRDL_HUMAN	13.3858	12.7964	13.1941	13.0978	79483	4	sp|O14979|HNRDL_HUMAN	HNRDL	O14979
sp|Q9UQ80|PA2G4_HUMAN	13.3835	13.1606	14.638	14.7519	207830	9	sp|Q9UQ80|PA2G4_HUMAN	PA2G4	Q9UQ80
sp|Q15393|SF3B3_HUMAN	13.3825	12.3036	12.5438	13.7483	8713.5	1	sp|Q15393|SF3B3_HUMAN	SF3B3	Q15393
sp|Q14699|RFTN1_HUMAN	13.3815	13.482	15.8746	16.123	469990	10	sp|Q14699|RFTN1_HUMAN	RFTN1	Q14699
sp|Q16881|TRXR1_HUMAN	13.3799	13.3801	13.4214	14.0958	156830	10	sp|Q16881|TRXR1_HUMAN	TRXR1	Q16881
sp|P62861|RS30_HUMAN	13.3781	12.3395	12.481	13.0905	16927	1	sp|P62861|RS30_HUMAN	RS30	P62861
sp|Q9H3S7|PTN23_HUMAN	13.3772	12.2108	20.9489	21.1176	5979300	11	sp|Q9H3S7|PTN23_HUMAN	PTN23	Q9H3S7
sp|O15143|ARC1B_HUMAN	13.3735	13.631	13.9354	14.3076	133450	7	sp|O15143|ARC1B_HUMAN	ARC1B	O15143
sp|P11216|PYGB_HUMAN	13.3725	14.069	13.8258	13.9314	202700	12	sp|P11216|PYGB_HUMAN	PYGB	P11216
sp|Q05655|KPCD_HUMAN	13.3707	12.6823	13.5222	12.9264	33312	2	sp|Q05655|KPCD_HUMAN	KPCD	Q05655
sp|O14924|RGS12_HUMAN	13.3702	12.7472	13.1502	12.8935	3899.3	1	sp|O14924|RGS12_HUMAN	RGS12	O14924
sp|O43765|SGTA_HUMAN	13.3642	12.9475	12.2242	13.6523	23493	2	sp|O43765|SGTA_HUMAN	SGTA	O43765
sp|Q9NWQ8|PHAG1_HUMAN	13.3638	13.0712	12.9127	12.657	19408	2	sp|Q9NWQ8|PHAG1_HUMAN	PHAG1	Q9NWQ8
sp|P26012|ITB8_HUMAN	13.3619	13.519	13.5037	12.889	13985	2	sp|P26012|ITB8_HUMAN	ITB8	P26012
sp|O75712|CXB3_HUMAN	13.3607	14.4934	17.3855	17.6861	1113800	8	sp|O75712|CXB3_HUMAN	CXB3	O75712
sp|Q9Y6Q5|AP1M2_HUMAN	13.3573	13.158	12.5258	13.1334	2697.5	1	sp|Q9Y6Q5|AP1M2_HUMAN	AP1M2	Q9Y6Q5
sp|O95433|AHSA1_HUMAN	13.3546	13.4297	12.7756	12.2079	41233	4	sp|O95433|AHSA1_HUMAN	AHSA1	O95433
sp|O95373|IPO7_HUMAN	13.3545	12.5996	13.7613	12.7396	56436	3	sp|O95373|IPO7_HUMAN	IPO7	O95373
sp|P13612|ITA4_HUMAN	13.3458	13.4572	13.3096	13.2448	107790	4	sp|P13612|ITA4_HUMAN	ITA4	P13612
sp|P54105|ICLN_HUMAN	13.344	13.1334	13.3034	12.8192	238020	5	sp|P54105|ICLN_HUMAN	ICLN	P54105
sp|Q8WU20|FRS2_HUMAN	13.3411	12.7696	11.8821	13.4411	19263	2	sp|Q8WU20|FRS2_HUMAN	FRS2	Q8WU20
sp|O15126|SCAM1_HUMAN	13.337	13.9351	13.9199	14.0504	184200	11	sp|O15126|SCAM1_HUMAN	SCAM1	O15126
sp|P62277|RS13_HUMAN	13.3347	13.1384	12.431	13.9734	74447	5	sp|P62277|RS13_HUMAN	RS13	P62277
sp|Q96PY5|FMNL2_HUMAN	13.3339	14.4495	17.4456	17.36	2382000	58	sp|Q96PY5|FMNL2_HUMAN;sp|Q8IVF7|FMNL3_HUMAN;sp|Q6IPM2|IQCE_HUMAN;REV__sp|Q9Y5G7|PCDG6_HUMAN;sp|O95466|FMNL1_HUMAN	FMNL2	Q96PY5
sp|Q5TZA2|CROCC_HUMAN	13.3311	13.146	12.9674	12.5015	674710	2	sp|Q5TZA2|CROCC_HUMAN	CROCC	Q5TZA2
sp|O60291|MGRN1_HUMAN	13.3305	12.7035	12.6702	13.4247	46112	4	sp|O60291|MGRN1_HUMAN	MGRN1	O60291
sp|O00273|DFFA_HUMAN	13.3287	13.3334	12.346	12.1896	7320.4	1	sp|O00273|DFFA_HUMAN	DFFA	O00273
sp|Q9UKG1|DP13A_HUMAN	13.3234	13.666	12.3532	12.5568	30770	2	sp|Q9UKG1|DP13A_HUMAN	DP13A	Q9UKG1
sp|P62241|RS8_HUMAN	13.3209	13.7221	14.2471	14.9688	124510	8	sp|P62241|RS8_HUMAN	RS8	P62241
sp|Q9Y289|SC5A6_HUMAN	13.3202	15.1304	18.0585	18.3426	1425600	13	sp|Q9Y289|SC5A6_HUMAN	SC5A6	Q9Y289
sp|P11169|GTR3_HUMAN;sp|Q8TDB8|GTR14_HUMAN	13.3167	12.0845	14.2293	14.4269	178100	10	sp|P11169|GTR3_HUMAN;sp|Q8TDB8|GTR14_HUMAN	GTR3	P11169
sp|Q5T2T1|MPP7_HUMAN	13.3157	12.539	14.2365	14.4577	370990	19	sp|Q5T2T1|MPP7_HUMAN	MPP7	Q5T2T1
sp|Q5W0Z9|ZDH20_HUMAN	13.3144	13.7128	12.8077	13.4866	51027	1	sp|Q5W0Z9|ZDH20_HUMAN	ZDH20	Q5W0Z9
sp|P05089|ARGI1_HUMAN	13.313	13.5627	13.0338	12.4017	6956.9	1	sp|P05089|ARGI1_HUMAN	ARGI1	P05089
sp|Q99832|TCPH_HUMAN	13.3122	14.0276	14.9945	14.9302	357750	19	sp|Q99832|TCPH_HUMAN	TCPH	Q99832
sp|O43752|STX6_HUMAN	13.3105	11.8828	13.9807	14.2494	100290	6	sp|O43752|STX6_HUMAN	STX6	O43752
sp|Q9ULG6|CCPG1_HUMAN	13.3077	13.1048	12.0152	12.4946	14296	1	sp|Q9ULG6|CCPG1_HUMAN	CCPG1	Q9ULG6
sp|Q9NP84|TNR12_HUMAN	13.3027	13.0295	13.1345	12.116	27798	1	sp|Q9NP84|TNR12_HUMAN	TNR12	Q9NP84
sp|O15230|LAMA5_HUMAN	13.3008	12.8047	13.778	13.9453	126700	10	sp|O15230|LAMA5_HUMAN	LAMA5	O15230
sp|Q8NDC0|MISSL_HUMAN	13.2974	13.061	12.9345	12.3741	311100	4	sp|Q8NDC0|MISSL_HUMAN	MISSL	Q8NDC0
sp|O95292|VAPB_HUMAN;sp|Q9P0L0|VAPA_HUMAN	13.2971	13.4107	13.3539	12.6054	130900	4	sp|O95292|VAPB_HUMAN;sp|Q9P0L0|VAPA_HUMAN	VAPB	O95292
sp|Q03113|GNA12_HUMAN	13.2958	13.3942	14.2287	13.3236	81995	3	sp|Q03113|GNA12_HUMAN	GNA12	Q03113
sp|Q9Y3B8|ORN_HUMAN	13.2879	13.473	13.8498	12.5607	60168	3	sp|Q9Y3B8|ORN_HUMAN	ORN	Q9Y3B8
sp|P61081|UBC12_HUMAN	13.2876	12.6398	13.862	14.0283	91031	4	sp|P61081|UBC12_HUMAN	UBC12	P61081
sp|O60443|GSDME_HUMAN	13.2861	13.9161	13.7228	14.022	134090	10	sp|O60443|GSDME_HUMAN	GSDME	O60443
sp|Q9Y6B6|SAR1B_HUMAN;sp|Q9NR31|SAR1A_HUMAN	13.2854	13.038	12.3069	12.8804	67461	2	sp|Q9Y6B6|SAR1B_HUMAN;sp|Q9NR31|SAR1A_HUMAN	SAR1B	Q9Y6B6
sp|O14828|SCAM3_HUMAN	13.2848	11.5771	16.4417	16.786	744590	15	sp|O14828|SCAM3_HUMAN	SCAM3	O14828
sp|Q13443|ADAM9_HUMAN	13.2841	13.473	12.6099	13.1193	68703	3	sp|Q13443|ADAM9_HUMAN	ADAM9	Q13443
sp|Q9UHB6|LIMA1_HUMAN	13.284	13.4781	13.0337	13.0992	48244	5	sp|Q9UHB6|LIMA1_HUMAN	LIMA1	Q9UHB6
sp|Q9Y2Q0|AT8A1_HUMAN	13.2832	13.1365	12.9665	13.5188	58292	5	sp|Q9Y2Q0|AT8A1_HUMAN;sp|Q9NTI2|AT8A2_HUMAN	AT8A1	Q9Y2Q0
sp|Q9Y4F1|FARP1_HUMAN	13.282	12.7818	13.2122	11.6043	11869	1	sp|Q9Y4F1|FARP1_HUMAN	FARP1	Q9Y4F1
sp|Q8TAA9|VANG1_HUMAN	13.2763	13.1503	12.1588	13.6308	119840	5	sp|Q8TAA9|VANG1_HUMAN	VANG1	Q8TAA9
sp|Q07020|RL18_HUMAN	13.276	12.6787	14.7385	14.8923	158830	6	sp|Q07020|RL18_HUMAN	RL18	Q07020
sp|P17693|HLAG_HUMAN	13.2757	13.186	13.1919	13.0359	6159200	11	sp|P17693|HLAG_HUMAN	HLAG	P17693
sp|Q9Y237|PIN4_HUMAN	13.2752	12.5207	12.9636	13.1552	15224	2	sp|Q9Y237|PIN4_HUMAN	PIN4	Q9Y237
sp|O76081|RGS20_HUMAN	13.2698	12.861	13.3635	11.7703	41383	2	sp|O76081|RGS20_HUMAN	RGS20	O76081
sp|P33316|DUT_HUMAN	13.267	14.4871	13.6267	12.4619	13152	1	sp|P33316|DUT_HUMAN	DUT	P33316
sp|P55884|EIF3B_HUMAN	13.2661	14.0914	12.9732	13.1595	30949	2	sp|P55884|EIF3B_HUMAN	EIF3B	P55884
sp|Q9NQP4|PFD4_HUMAN	13.2656	12.1358	12.3725	12.7377	49884	2	sp|Q9NQP4|PFD4_HUMAN	PFD4	Q9NQP4
sp|Q02878|RL6_HUMAN	13.2634	13.2115	11.5369	13.2551	51590	3	sp|Q02878|RL6_HUMAN	RL6	Q02878
sp|P23458|JAK1_HUMAN	13.2609	13.9423	13.182	13.6263	55716	5	sp|P23458|JAK1_HUMAN	JAK1	P23458
sp|O95816|BAG2_HUMAN	13.254	12.6519	11.8686	13.9133	23792	2	sp|O95816|BAG2_HUMAN	BAG2	O95816
sp|P21399|ACOC_HUMAN	13.2503	14.0687	12.8426	12.6085	24626	2	sp|P21399|ACOC_HUMAN	ACOC	P21399
sp|O14744|ANM5_HUMAN	13.2491	14.0464	12.7436	12.0178	41458	3	sp|O14744|ANM5_HUMAN	ANM5	O14744
sp|P06737|PYGL_HUMAN	13.2481	13.174	16.1161	16.194	705140	18	sp|P06737|PYGL_HUMAN	PYGL	P06737
sp|Q86SJ2|AMGO2_HUMAN	13.2478	13.1418	15.0767	15.1893	222250	10	sp|Q86SJ2|AMGO2_HUMAN	AMGO2	Q86SJ2
sp|P59768|GBG2_HUMAN	13.2455	13.8199	12.2343	12.9145	35159	1	sp|P59768|GBG2_HUMAN	GBG2	P59768
sp|P07099|HYEP_HUMAN	13.2452	14.297	12.9956	12.6401	29824	2	sp|P07099|HYEP_HUMAN	HYEP	P07099
sp|Q9NXU5|ARL15_HUMAN	13.2411	12.8142	15.6652	15.9699	270830	7	sp|Q9NXU5|ARL15_HUMAN	ARL15	Q9NXU5
sp|P60983|GMFB_HUMAN;sp|O60234|GMFG_HUMAN	13.24	12.8813	13.3523	13.6987	104790	6	sp|P60983|GMFB_HUMAN;sp|O60234|GMFG_HUMAN	GMFB	P60983
sp|P28838|AMPL_HUMAN	13.2375	12.8612	12.1616	12.5676	9179.3	1	sp|P28838|AMPL_HUMAN	AMPL	P28838
sp|P42892|ECE1_HUMAN	13.2362	12.5295	15.3093	15.0345	211900	9	sp|P42892|ECE1_HUMAN	ECE1	P42892
sp|Q9BSQ5|CCM2_HUMAN	13.2359	12.7248	12.0923	13.4701	5583.5	1	sp|Q9BSQ5|CCM2_HUMAN	CCM2	Q9BSQ5
sp|P06865|HEXA_HUMAN	13.2339	13.1963	13.5306	13.2082	14150	1	sp|P06865|HEXA_HUMAN	HEXA	P06865
sp|P63162|RSMN_HUMAN;sp|P14678|RSMB_HUMAN	13.2315	14.4056	13.9413	13.5337	8682.5	1	sp|P63162|RSMN_HUMAN;sp|P14678|RSMB_HUMAN	RSMN	P63162
sp|O15144|ARPC2_HUMAN	13.2286	14.4757	14.498	14.6131	275600	10	sp|O15144|ARPC2_HUMAN	ARPC2	O15144
sp|Q9C0H2|TTYH3_HUMAN	13.2281	12.9608	18.3009	18.1823	2408800	22	sp|Q9C0H2|TTYH3_HUMAN	TTYH3	Q9C0H2
sp|O15083|ERC2_HUMAN	13.2273	12.9129	11.7423	13.2686	180740	2	sp|O15083|ERC2_HUMAN	ERC2	O15083
sp|O75608|LYPA1_HUMAN	13.2244	12.7955	12.8695	12.3335	237770	4	sp|O75608|LYPA1_HUMAN	LYPA1	O75608
sp|P56199|ITA1_HUMAN	13.2222	13.8334	14.5738	14.6136	141830	10	sp|P56199|ITA1_HUMAN	ITA1	P56199
sp|P28065|PSB9_HUMAN	13.2219	13.3148	13.1623	12.8591	20731	2	sp|P28065|PSB9_HUMAN	PSB9	P28065
sp|Q96CS7|PKHB2_HUMAN	13.2135	13.3561	12.3901	12.0639	320020	4	sp|Q96CS7|PKHB2_HUMAN	PKHB2	Q96CS7
sp|Q02818|NUCB1_HUMAN	13.213	12.4108	13.1582	12.7118	21944	2	sp|Q02818|NUCB1_HUMAN	NUCB1	Q02818
sp|Q9H425|CA198_HUMAN	13.2117	12.2276	12.2396	12.764	29755	2	sp|Q9H425|CA198_HUMAN	CA198	Q9H425
sp|P14384|CBPM_HUMAN	13.2106	13.3471	13.2273	13.0722	18538	2	sp|P14384|CBPM_HUMAN	CBPM	P14384
sp|P43121|MUC18_HUMAN	13.2071	13.3399	14.9623	15.1111	378360	12	sp|P43121|MUC18_HUMAN	MUC18	P43121
sp|Q9Y3B3|TMED7_HUMAN	13.2065	14.0404	14.3888	13.8247	80351	6	sp|Q9Y3B3|TMED7_HUMAN	TMED7	Q9Y3B3
sp|O95772|STR3N_HUMAN	13.2064	13.6669	12.8644	13.0239	154770	4	sp|O95772|STR3N_HUMAN	STR3N	O95772
sp|Q86X55|CARM1_HUMAN	13.2059	13.6993	12.6062	12.5441	29696	2	sp|Q86X55|CARM1_HUMAN	CARM1	Q86X55
sp|Q8TBX8|PI42C_HUMAN	13.2054	13.0127	12.6911	12.4054	54546	4	sp|Q8TBX8|PI42C_HUMAN	PI42C	Q8TBX8
sp|Q92633|LPAR1_HUMAN	13.2017	12.7978	15.8459	15.5633	262250	6	sp|Q92633|LPAR1_HUMAN	LPAR1	Q92633
sp|Q9Y3I0|RTCB_HUMAN	13.2009	13.3045	12.4655	12.4477	30447	2	sp|Q9Y3I0|RTCB_HUMAN	RTCB	Q9Y3I0
sp|P49458|SRP09_HUMAN	13.2	13.8171	12.3982	13.1681	14076	1	sp|P49458|SRP09_HUMAN	SRP09	P49458
sp|Q96RT1|ERBIN_HUMAN	13.1976	12.12	13.0203	12.1854	143800	10	sp|Q96RT1|ERBIN_HUMAN	ERBIN	Q96RT1
sp|O75874|IDHC_HUMAN	13.197	12.6514	14.0192	14.1154	155500	11	sp|O75874|IDHC_HUMAN;sp|P48735|IDHP_HUMAN	IDHC	O75874
sp|P00352|AL1A1_HUMAN	13.1968	11.6597	14.1191	14.7504	294730	11	sp|P00352|AL1A1_HUMAN	AL1A1	P00352
sp|P28062|PSB8_HUMAN	13.1874	12.6404	12.7668	12.5402	7254.9	1	sp|P28062|PSB8_HUMAN	PSB8	P28062
sp|Q99439|CNN2_HUMAN	13.1829	12.6415	12.7961	13.653	29076	4	sp|Q99439|CNN2_HUMAN	CNN2	Q99439
sp|P01876|IGHA1_HUMAN	13.1796	13.5397	14.73	14.821	172850	7	sp|P01876|IGHA1_HUMAN;sp|P01877|IGHA2_HUMAN;sp|P0DOX2|IGA2_HUMAN	IGHA1	P01876
sp|Q9UNM6|PSD13_HUMAN	13.1776	12.9964	13.2732	13.3035	26639	2	sp|Q9UNM6|PSD13_HUMAN	PSD13	Q9UNM6
sp|P0DMR1|HNRC4_HUMAN;sp|O60812|HNRC1_HUMAN;sp|B7ZW38|HNRC3_HUMAN;sp|B2RXH8|HNRC2_HUMAN;sp|P07910|HNRPC_HUMAN	13.1758	13.5404	13.6693	11.2428	65509	2	sp|P0DMR1|HNRC4_HUMAN;sp|O60812|HNRC1_HUMAN;sp|B7ZW38|HNRC3_HUMAN;sp|B2RXH8|HNRC2_HUMAN;sp|P07910|HNRPC_HUMAN	HNRC4	P0DMR1
sp|Q2VIR3|IF2GL_HUMAN;sp|P41091|IF2G_HUMAN	13.1743	12.847	12.0017	13.535	33406	3	sp|Q2VIR3|IF2GL_HUMAN;sp|P41091|IF2G_HUMAN	IF2GL	Q2VIR3
sp|Q9H2K8|TAOK3_HUMAN	13.1741	14.189	16.176	16.3465	842790	27	sp|Q9H2K8|TAOK3_HUMAN	TAOK3	Q9H2K8
sp|Q99613|EIF3C_HUMAN;sp|B5ME19|EIFCL_HUMAN	13.1729	13.599	12.5392	12.3866	5112.9	1	sp|Q99613|EIF3C_HUMAN;sp|B5ME19|EIFCL_HUMAN	EIF3C	Q99613
sp|A8MQ03|CRTP1_HUMAN	13.1717	13.9927	16.563	16.6537	559510	5	sp|A8MQ03|CRTP1_HUMAN	CRTP1	A8MQ03
sp|P05141|ADT2_HUMAN;sp|P12236|ADT3_HUMAN;sp|P12235|ADT1_HUMAN	13.1714	14.1164	13.7072	12.9818	104000	5	sp|P05141|ADT2_HUMAN;sp|P12236|ADT3_HUMAN;sp|P12235|ADT1_HUMAN	ADT2	P05141
sp|Q8TDW0|LRC8C_HUMAN	13.1704	13.8219	12.4002	13.9679	5858.3	1	sp|Q8TDW0|LRC8C_HUMAN	LRC8C	Q8TDW0
sp|Q9UIG8|SO3A1_HUMAN	13.169	13.7967	12.787	13.3734	14196	2	sp|Q9UIG8|SO3A1_HUMAN	SO3A1	Q9UIG8
sp|P78504|JAG1_HUMAN	13.1642	11.758	16.4924	16.1398	455850	10	sp|P78504|JAG1_HUMAN	JAG1	P78504
sp|P15153|RAC2_HUMAN	13.164	12.0496	12.5092	12.1525	1279300	6	sp|P15153|RAC2_HUMAN;sp|P17081|RHOQ_HUMAN;sp|Q9H4E5|RHOJ_HUMAN	RAC2	P15153
sp|Q92544|TM9S4_HUMAN	13.1637	13.1415	11.3873	14.6316	15535	1	sp|Q92544|TM9S4_HUMAN	TM9S4	Q92544
sp|Q9NZ42|PEN2_HUMAN	13.1626	13.8414	13.0019	12.3956	29257	2	sp|Q9NZ42|PEN2_HUMAN	PEN2	Q9NZ42
sp|P42356|PI4KA_HUMAN;sp|A4QPH2|PI4P2_HUMAN	13.1611	14.4697	11.5403	12.5542	41120	3	sp|P42356|PI4KA_HUMAN;sp|A4QPH2|PI4P2_HUMAN	PI4KA	P42356
sp|Q9UBQ0|VPS29_HUMAN	13.1585	12.8844	13.6629	14.0231	105950	7	sp|Q9UBQ0|VPS29_HUMAN	VPS29	Q9UBQ0
sp|Q9H6X2|ANTR1_HUMAN	13.1584	14.2652	13.0285	13.0012	34587	2	sp|Q9H6X2|ANTR1_HUMAN	ANTR1	Q9H6X2
sp|Q15746|MYLK_HUMAN	13.1567	14.2682	12.7875	13.5334	678730	2	sp|Q15746|MYLK_HUMAN	MYLK	Q15746
sp|P09493|TPM1_HUMAN	13.1548	14.2891	12.9419	11.583	98074	4	sp|P09493|TPM1_HUMAN	TPM1	P09493
sp|Q9Y696|CLIC4_HUMAN	13.1535	15.9443	16.058	15.9549	566370	11	sp|Q9Y696|CLIC4_HUMAN;sp|O15247|CLIC2_HUMAN;sp|Q9NZA1|CLIC5_HUMAN;sp|Q96NY7|CLIC6_HUMAN	CLIC4	Q9Y696
sp|Q9HC07|TM165_HUMAN	13.1462	12.8476	11.3961	14.0337	3242.5	1	sp|Q9HC07|TM165_HUMAN	TM165	Q9HC07
sp|P61163|ACTZ_HUMAN	13.1458	13.8352	13.5606	13.3707	55274	4	sp|P61163|ACTZ_HUMAN;sp|P42025|ACTY_HUMAN	ACTZ	P61163
sp|P62081|RS7_HUMAN	13.1451	12.3038	12.7906	12.8765	73531	6	sp|P62081|RS7_HUMAN	RS7	P62081
sp|Q96B97|SH3K1_HUMAN	13.1449	11.7224	14.0374	14.4166	195040	9	sp|Q96B97|SH3K1_HUMAN	SH3K1	Q96B97
sp|O14964|HGS_HUMAN	13.1446	13.4691	16.616	16.677	1158500	29	sp|O14964|HGS_HUMAN	HGS	O14964
sp|P98160|PGBM_HUMAN	13.1434	13.2605	13.0103	12.3406	8020	1	sp|P98160|PGBM_HUMAN	PGBM	P98160
sp|P84090|ERH_HUMAN	13.1395	13.2951	12.3009	12.9156	56977	3	sp|P84090|ERH_HUMAN	ERH	P84090
sp|P30408|T4S1_HUMAN	13.1387	13.5142	13.5092	12.5468	21620	1	sp|P30408|T4S1_HUMAN	T4S1	P30408
sp|Q96SL1|DIRC2_HUMAN	13.1346	12.9495	13.4404	13.5856	76484	2	sp|Q96SL1|DIRC2_HUMAN	DIRC2	Q96SL1
sp|P13489|RINI_HUMAN	13.1343	12.807	11.7236	12.7532	91601	4	sp|P13489|RINI_HUMAN	RINI	P13489
sp|O95336|6PGL_HUMAN	13.1329	12.9256	13.6089	12.5896	80228	3	sp|O95336|6PGL_HUMAN	6PGL	O95336
sp|P25398|RS12_HUMAN	13.1288	12.9287	14.2104	14.5664	134090	6	sp|P25398|RS12_HUMAN	RS12	P25398
sp|P49588|SYAC_HUMAN	13.1262	13.0168	13.0334	13.7326	112550	5	sp|P49588|SYAC_HUMAN	SYAC	P49588
sp|O14817|TSN4_HUMAN	13.126	13.2238	18.2859	18.068	1263400	11	sp|O14817|TSN4_HUMAN	TSN4	O14817
sp|Q92973|TNPO1_HUMAN	13.1241	12.9747	13.3236	11.9447	32364	2	sp|Q92973|TNPO1_HUMAN	TNPO1	Q92973
sp|P58335|ANTR2_HUMAN	13.1221	13.494	15.0548	15.1839	398190	12	sp|P58335|ANTR2_HUMAN	ANTR2	P58335
sp|O60635|TSN1_HUMAN	13.1188	12.5423	12.8951	13.0252	85431	4	sp|O60635|TSN1_HUMAN	TSN1	O60635
sp|Q14517|FAT1_HUMAN	13.1175	12.3171	15.0926	15.3766	513850	30	sp|Q14517|FAT1_HUMAN	FAT1	Q14517
sp|Q9P0V3|SH3B4_HUMAN	13.1161	13.4119	11.564	13.241	132730	4	sp|Q9P0V3|SH3B4_HUMAN	SH3B4	Q9P0V3
sp|Q9UHX3|AGRE2_HUMAN	13.115	12.9459	17.3731	17.5963	864800	12	sp|Q9UHX3|AGRE2_HUMAN;sp|Q9BY15|AGRE3_HUMAN	AGRE2	Q9UHX3
sp|O95372|LYPA2_HUMAN	13.1138	12.9322	13.248	13.6984	23048	2	sp|O95372|LYPA2_HUMAN	LYPA2	O95372
sp|Q12965|MYO1E_HUMAN	13.1128	12.5689	16.2155	16.2463	1069300	28	sp|Q12965|MYO1E_HUMAN;sp|O00160|MYO1F_HUMAN	MYO1E	Q12965
sp|P78324|SHPS1_HUMAN	13.1123	14.9499	14.8661	15.1991	319630	9	sp|P78324|SHPS1_HUMAN	SHPS1	P78324
sp|P62318|SMD3_HUMAN	13.1106	12.6854	11.899	12.0792	73874	3	sp|P62318|SMD3_HUMAN	SMD3	P62318
sp|Q14210|LY6D_HUMAN	13.11	12.9535	12.4227	13.3313	1869600	4	sp|Q14210|LY6D_HUMAN	LY6D	Q14210
sp|P61587|RND3_HUMAN	13.1095	12.723	12.4435	13.6391	46830	5	sp|P61587|RND3_HUMAN	RND3	P61587
sp|P00749|UROK_HUMAN	13.1095	12.2292	14.8806	14.9903	236100	9	sp|P00749|UROK_HUMAN	UROK	P00749
sp|Q04912|RON_HUMAN	13.1063	12.8394	14.8555	15.1231	381320	14	sp|Q04912|RON_HUMAN	RON	Q04912
sp|P35998|PRS7_HUMAN	13.1061	13.2839	12.4692	12.4231	13048	1	sp|P35998|PRS7_HUMAN	PRS7	P35998
sp|Q8WXX7|AUTS2_HUMAN	13.1042	13.0814	11.9964	12.9978	33471	1	sp|Q8WXX7|AUTS2_HUMAN	AUTS2	Q8WXX7
sp|Q9Y6W3|CAN7_HUMAN	13.1033	13.2828	15.3741	15.6417	612300	23	sp|Q9Y6W3|CAN7_HUMAN	CAN7	Q9Y6W3
sp|P20042|IF2B_HUMAN	13.1027	12.2061	14.7531	12.2391	33188	2	sp|P20042|IF2B_HUMAN	IF2B	P20042
sp|O60499|STX10_HUMAN	13.1003	12.4571	12.2836	13.5483	53718	2	sp|O60499|STX10_HUMAN	STX10	O60499
sp|P84085|ARF5_HUMAN	13.0987	12.9523	13.2569	12.6031	105740	4	sp|P84085|ARF5_HUMAN	ARF5	P84085
sp|Q96PD2|DCBD2_HUMAN	13.0978	12.9958	15.7465	15.6706	488280	19	sp|Q96PD2|DCBD2_HUMAN	DCBD2	Q96PD2
sp|Q9NRF8|PYRG2_HUMAN;sp|P17812|PYRG1_HUMAN	13.0962	12.6438	12.583	12.5002	4777.7	1	sp|Q9NRF8|PYRG2_HUMAN;sp|P17812|PYRG1_HUMAN	PYRG2	Q9NRF8
sp|Q96A59|MALD3_HUMAN	13.095	13.8109	13.8593	13.9166	66169	4	sp|Q96A59|MALD3_HUMAN	MALD3	Q96A59
sp|Q5HYA8|MKS3_HUMAN	13.095	11.7534	13.7745	13.3683	22696	2	sp|Q5HYA8|MKS3_HUMAN	MKS3	Q5HYA8
sp|Q96P63|SPB12_HUMAN	13.0943	13.3423	13.4708	13.4007	65799	6	sp|Q96P63|SPB12_HUMAN	SPB12	Q96P63
sp|Q13283|G3BP1_HUMAN	13.0919	13.2676	12.2991	13.0276	34010	3	sp|Q13283|G3BP1_HUMAN	G3BP1	Q13283
sp|Q8ND76|CCNY_HUMAN	13.0898	13.6164	12.4943	12.0154	41687	3	sp|Q8ND76|CCNY_HUMAN;sp|Q8N7R7|CCYL1_HUMAN	CCNY	Q8ND76
sp|Q6P1N0|C2D1A_HUMAN	13.0885	13.8734	15.0343	15.6131	214770	9	sp|Q6P1N0|C2D1A_HUMAN	C2D1A	Q6P1N0
sp|Q96E17|RAB3C_HUMAN	13.0859	14.1226	13.3472	12.1266	13326	2	sp|Q96E17|RAB3C_HUMAN	RAB3C	Q96E17
sp|Q15833|STXB2_HUMAN	13.0816	12.4009	12.8729	12.2355	32518	4	sp|Q15833|STXB2_HUMAN	STXB2	Q15833
sp|Q96FJ2|DYL2_HUMAN;sp|P63167|DYL1_HUMAN	13.0788	13.2633	11.8719	13.3427	272430	5	sp|Q96FJ2|DYL2_HUMAN;sp|P63167|DYL1_HUMAN	DYL2	Q96FJ2
sp|O43684|BUB3_HUMAN	13.0769	13.7569	13.4863	12.6607	30162	3	sp|O43684|BUB3_HUMAN	BUB3	O43684
sp|P42566|EPS15_HUMAN	13.0764	12.409	11.2939	11.7814	55370	4	sp|P42566|EPS15_HUMAN	EPS15	P42566
sp|P46934|NEDD4_HUMAN	13.0749	12.7608	13.814	13.7751	183790	17	sp|P46934|NEDD4_HUMAN	NEDD4	P46934
sp|Q5T0N5|FBP1L_HUMAN	13.0725	13.3162	12.6679	12.6336	12400	1	sp|Q5T0N5|FBP1L_HUMAN	FBP1L	Q5T0N5
sp|Q9NSC5|HOME3_HUMAN	13.0724	13.4919	11.4652	11.8596	16312	3	sp|Q9NSC5|HOME3_HUMAN	HOME3	Q9NSC5
sp|Q9NZW5|MPP6_HUMAN	13.0716	13.5427	16.2143	16.3797	1420400	38	sp|Q9NZW5|MPP6_HUMAN;sp|Q14168|MPP2_HUMAN	MPP6	Q9NZW5
sp|P01857|IGHG1_HUMAN;sp|P0DOX5|IGG1_HUMAN	13.0703	13.3064	17.0796	17.0496	826140	10	sp|P01857|IGHG1_HUMAN;sp|P0DOX5|IGG1_HUMAN;sp|P01860|IGHG3_HUMAN	IGHG1	P01857
sp|P45974|UBP5_HUMAN	13.0692	13.6198	13.294	12.8678	698230	4	sp|P45974|UBP5_HUMAN	UBP5	P45974
sp|P09417|DHPR_HUMAN	13.0691	13.0577	12.9308	12.0911	11930	1	sp|P09417|DHPR_HUMAN	DHPR	P09417
sp|Q15366|PCBP2_HUMAN	13.0661	13.8032	12.4426	11.797	103000	4	sp|Q15366|PCBP2_HUMAN	PCBP2	Q15366
sp|O75387|LAT3_HUMAN	13.0659	13.8766	15.0814	15.6052	244690	7	sp|O75387|LAT3_HUMAN	LAT3	O75387
sp|Q9P2J5|SYLC_HUMAN	13.0648	13.8275	11.8134	12.745	25411	2	sp|Q9P2J5|SYLC_HUMAN	SYLC	Q9P2J5
sp|Q9UBR2|CATZ_HUMAN	13.0638	13.18	11.0552	13.0132	62530	3	sp|Q9UBR2|CATZ_HUMAN	CATZ	Q9UBR2
sp|P08572|CO4A2_HUMAN	13.0635	13.5239	13.0513	12.4143	43881	2	sp|P08572|CO4A2_HUMAN	CO4A2	P08572
sp|P18510|IL1RA_HUMAN	13.0622	13.3172	13.1009	11.8	21673	2	sp|P18510|IL1RA_HUMAN	IL1RA	P18510
sp|Q96IU4|ABHEB_HUMAN	13.061	13.2837	12.6911	12.6091	110440	6	sp|Q96IU4|ABHEB_HUMAN	ABHEB	Q96IU4
sp|O60353|FZD6_HUMAN	13.0608	11.5148	12.9878	13.0061	79662	5	sp|O60353|FZD6_HUMAN	FZD6	O60353
sp|Q9HBH0|RHOF_HUMAN	13.0597	12.3067	12.8601	12.4451	14876	1	sp|Q9HBH0|RHOF_HUMAN	RHOF	Q9HBH0
sp|Q00796|DHSO_HUMAN	13.0541	12.2164	12.1648	13.0112	76513	4	sp|Q00796|DHSO_HUMAN	DHSO	Q00796
sp|P32969|RL9_HUMAN	13.0484	13.0034	13.0324	12.9541	27200	1	sp|P32969|RL9_HUMAN	RL9	P32969
sp|P0DOY3|IGLC3_HUMAN;sp|P0DOY2|IGLC2_HUMAN;sp|P0CG04|IGLC1_HUMAN;sp|P0CF74|IGLC6_HUMAN;sp|A0M8Q6|IGLC7_HUMAN;sp|B9A064|IGLL5_HUMAN;sp|P0DOX8|IGL1_HUMAN	13.0477	12.2992	14.6431	14.7805	116920	4	sp|P0DOY3|IGLC3_HUMAN;sp|P0DOY2|IGLC2_HUMAN;sp|P0CG04|IGLC1_HUMAN;sp|P0CF74|IGLC6_HUMAN;sp|A0M8Q6|IGLC7_HUMAN;sp|B9A064|IGLL5_HUMAN;sp|P0DOX8|IGL1_HUMAN	IGLC3	P0DOY3
sp|Q9NZU0|FLRT3_HUMAN	13.0459	12.9596	13.3169	12.319	60690	3	sp|Q9NZU0|FLRT3_HUMAN	FLRT3	Q9NZU0
sp|P07550|ADRB2_HUMAN	13.0452	13.3049	11.8533	13.2807	33264	2	sp|P07550|ADRB2_HUMAN	ADRB2	P07550
sp|P62917|RL8_HUMAN	13.0444	13.5412	13.1071	12.9572	6709.6	1	sp|P62917|RL8_HUMAN	RL8	P62917
sp|P31641|SC6A6_HUMAN	13.0441	13.5632	17.3964	17.4681	1139900	9	sp|P31641|SC6A6_HUMAN	SC6A6	P31641
sp|Q96FZ7|CHMP6_HUMAN	13.0437	12.4418	16.3883	16.5595	495470	11	sp|Q96FZ7|CHMP6_HUMAN	CHMP6	Q96FZ7
sp|P62249|RS16_HUMAN	13.0429	12.7382	14.6268	14.8921	145670	5	sp|P62249|RS16_HUMAN	RS16	P62249
sp|O43865|SAHH2_HUMAN;sp|Q96HN2|SAHH3_HUMAN	13.0414	13.3818	15.1978	15.3426	202500	6	sp|O43865|SAHH2_HUMAN;sp|Q96HN2|SAHH3_HUMAN	SAHH2	O43865
sp|P02751|FINC_HUMAN	13.0412	12.4863	18.6142	18.6351	13108000	106	sp|P02751|FINC_HUMAN	FINC	P02751
sp|O43155|FLRT2_HUMAN	13.0398	12.3345	11.9777	13.6277	4470	1	sp|O43155|FLRT2_HUMAN	FLRT2	O43155
sp|Q8N0X7|SPART_HUMAN	13.0378	13.6623	12.0075	12.9983	7489.3	1	sp|Q8N0X7|SPART_HUMAN	SPART	Q8N0X7
sp|O00468|AGRIN_HUMAN	13.0356	13.2522	14.8806	15.2321	391540	14	sp|O00468|AGRIN_HUMAN	AGRIN	O00468
sp|P15121|ALDR_HUMAN;sp|C9JRZ8|AK1BF_HUMAN	13.0326	13.3264	12.5736	13.0792	39733	2	sp|P15121|ALDR_HUMAN;sp|C9JRZ8|AK1BF_HUMAN	ALDR	P15121
sp|P09496|CLCA_HUMAN	13.0324	15.9022	15.8869	15.904	475400	8	sp|P09496|CLCA_HUMAN	CLCA	P09496
sp|O75436|VP26A_HUMAN	13.0321	12.2977	15.1609	15.6413	267110	10	sp|O75436|VP26A_HUMAN	VP26A	O75436
sp|O00308|WWP2_HUMAN	13.032	13.002	13.128	13.1517	87083	8	sp|O00308|WWP2_HUMAN	WWP2	O00308
sp|P56559|ARL4C_HUMAN	13.029	13.1042	13.7309	12.6098	11510	1	sp|P56559|ARL4C_HUMAN	ARL4C	P56559
sp|O76070|SYUG_HUMAN	13.0265	12.6093	12.3406	12.1916	192070	6	sp|O76070|SYUG_HUMAN;sp|Q16143|SYUB_HUMAN	SYUG	O76070
sp|P11117|PPAL_HUMAN	13.0244	13.2416	12.4473	12.1815	20915	2	sp|P11117|PPAL_HUMAN	PPAL	P11117
sp|O95747|OXSR1_HUMAN	13.0232	12.9569	13.1668	13.5962	86894	8	sp|O95747|OXSR1_HUMAN	OXSR1	O95747
sp|Q9NZV1|CRIM1_HUMAN	13.0222	14.5994	13.1379	12.8762	21347	2	sp|Q9NZV1|CRIM1_HUMAN	CRIM1	Q9NZV1
sp|Q6EMK4|VASN_HUMAN	13.0222	13.4214	13.4684	13.8182	15808	1	sp|Q6EMK4|VASN_HUMAN	VASN	Q6EMK4
sp|Q8N0Y7|PGAM4_HUMAN	13.0205	14.049	12.7862	12.4449	45204	3	sp|Q8N0Y7|PGAM4_HUMAN	PGAM4	Q8N0Y7
sp|P50914|RL14_HUMAN	13.0203	12.2526	13.764	11.9597	49432	2	sp|P50914|RL14_HUMAN	RL14	P50914
sp|Q0VAQ4|SMAGP_HUMAN	13.0163	12.7285	12.958	12.3576	13972	1	sp|Q0VAQ4|SMAGP_HUMAN	SMAGP	Q0VAQ4
sp|P02656|APOC3_HUMAN	13.0138	12.3962	13.4248	13.1109	17313	2	sp|P02656|APOC3_HUMAN	APOC3	P02656
sp|Q7Z7M9|GALT5_HUMAN	13.0103	12.1666	11.732	12.3184	601860	2	sp|Q7Z7M9|GALT5_HUMAN	GALT5	Q7Z7M9
sp|P49755|TMEDA_HUMAN	13.0095	13.59	14.4627	14.7215	252330	11	sp|P49755|TMEDA_HUMAN	TMEDA	P49755
sp|Q9Y2S6|TMA7_HUMAN	13.0092	12.8571	13.059	12.4277	69604	3	sp|Q9Y2S6|TMA7_HUMAN	TMA7	Q9Y2S6
sp|O94832|MYO1D_HUMAN	13.0061	13.9015	14.1352	14.546	325230	20	sp|O94832|MYO1D_HUMAN	MYO1D	O94832
sp|O00212|RHOD_HUMAN	13.0028	12.4597	11.468	12.3259	78938	3	sp|O00212|RHOD_HUMAN	RHOD	O00212
sp|Q9Y6M7|S4A7_HUMAN	13.0022	13.2121	15.547	15.4351	426940	19	sp|Q9Y6M7|S4A7_HUMAN;sp|Q6U841|S4A10_HUMAN	S4A7	Q9Y6M7
sp|O43278|SPIT1_HUMAN	12.9994	12.3337	12.1706	13.3762	105720	3	sp|O43278|SPIT1_HUMAN	SPIT1	O43278
sp|Q9HBW0|LPAR2_HUMAN	12.9993	12.7153	12.1138	11.9202	10838	1	sp|Q9HBW0|LPAR2_HUMAN	LPAR2	Q9HBW0
sp|Q96DV4|RM38_HUMAN	12.9992	13.4235	11.0857	12.7401	4559300	2	sp|Q96DV4|RM38_HUMAN	RM38	Q96DV4
sp|P53634|CATC_HUMAN	12.9992	12.3534	12.3275	13.7307	97741	6	sp|P53634|CATC_HUMAN	CATC	P53634
sp|P14550|AK1A1_HUMAN	12.9978	12.4177	13.8827	14.2936	88044	4	sp|P14550|AK1A1_HUMAN	AK1A1	P14550
sp|Q9GZU7|CTDS1_HUMAN	12.996	13.0491	12.4581	13.0869	46192	3	sp|Q9GZU7|CTDS1_HUMAN	CTDS1	Q9GZU7
sp|P41250|GARS_HUMAN	12.9954	13.4842	15.438	15.1738	266570	9	sp|P41250|GARS_HUMAN	GARS	P41250
sp|Q96GX8|CP074_HUMAN	12.9953	13.1874	13.198	11.4692	10640	1	sp|Q96GX8|CP074_HUMAN	CP074	Q96GX8
sp|O00515|LAD1_HUMAN	12.9884	12.8463	12.2624	12.6167	17360	2	sp|O00515|LAD1_HUMAN	LAD1	O00515
sp|P48637|GSHB_HUMAN	12.9875	13.5365	13.8822	13.7383	130390	8	sp|P48637|GSHB_HUMAN	GSHB	P48637
sp|P29508|SPB3_HUMAN;sp|P48594|SPB4_HUMAN	12.9855	12.8464	11.5614	12.6999	44950	3	sp|P29508|SPB3_HUMAN;sp|P48594|SPB4_HUMAN	SPB3	P29508
sp|P49448|DHE4_HUMAN;sp|P00367|DHE3_HUMAN	12.9844	13.3602	12.3721	13.1744	43317	3	sp|P49448|DHE4_HUMAN;sp|P00367|DHE3_HUMAN	DHE4	P49448
sp|Q96FX8|PERP_HUMAN	12.9826	12.938	11.8169	12.3371	84113	2	sp|Q96FX8|PERP_HUMAN	PERP	Q96FX8
sp|Q15019|SEPT2_HUMAN	12.9822	12.1996	13.2628	13.2838	149770	10	sp|Q15019|SEPT2_HUMAN	2021-09-02	Q15019
sp|Q96F07|CYFP2_HUMAN	12.9819	13.2586	12.5737	12.6565	75148	4	sp|Q96F07|CYFP2_HUMAN	CYFP2	Q96F07
sp|Q9Y2G9|SBNO2_HUMAN	12.9814	13.8989	12.6916	13.4166	43877	1	sp|Q9Y2G9|SBNO2_HUMAN	SBNO2	Q9Y2G9
sp|Q9Y6K9|NEMO_HUMAN	12.9808	13.8007	11.7565	12.696	31077	2	sp|Q9Y6K9|NEMO_HUMAN	NEMO	Q9Y6K9
sp|P46776|RL27A_HUMAN	12.9794	13.0935	13.2935	13.3477	59934	3	sp|P46776|RL27A_HUMAN	RL27A	P46776
sp|Q99795|GPA33_HUMAN	12.9768	13.9103	11.6505	12.8622	974000	3	sp|Q99795|GPA33_HUMAN	GPA33	Q99795
sp|O94973|AP2A2_HUMAN	12.9766	12.433	12.1176	12.4002	108600	6	sp|O94973|AP2A2_HUMAN	AP2A2	O94973
sp|Q8IV08|PLD3_HUMAN	12.9761	13.2097	12.3732	13.098	112360	4	sp|Q8IV08|PLD3_HUMAN	PLD3	Q8IV08
sp|Q9H5Y7|SLIK6_HUMAN	12.9749	13.1181	12.9692	12.3645	19169	2	sp|Q9H5Y7|SLIK6_HUMAN	SLIK6	Q9H5Y7
sp|O60449|LY75_HUMAN	12.9731	12.8778	13.5901	13.0267	163020	1	sp|O60449|LY75_HUMAN	LY75	O60449
sp|P10619|PPGB_HUMAN	12.9729	13.3259	12.6635	12.2418	36839	2	sp|P10619|PPGB_HUMAN	PPGB	P10619
sp|O43291|SPIT2_HUMAN	12.9718	13.0816	13.9387	12.7279	57503	4	sp|O43291|SPIT2_HUMAN	SPIT2	O43291
sp|Q8TEW0|PARD3_HUMAN	12.9707	13.9644	12.7699	12.4843	45864	4	sp|Q8TEW0|PARD3_HUMAN	PARD3	Q8TEW0
sp|P41440|S19A1_HUMAN	12.9695	12.9144	16.8284	16.8864	801060	12	sp|P41440|S19A1_HUMAN	S19A1	P41440
sp|Q02790|FKBP4_HUMAN	12.9673	13.7822	15.6083	15.7053	507370	19	sp|Q02790|FKBP4_HUMAN	FKBP4	Q02790
sp|P08473|NEP_HUMAN	12.9661	12.63	13.6405	13.4839	109530	9	sp|P08473|NEP_HUMAN	NEP	P08473
sp|P09471|GNAO_HUMAN	12.9656	13.8125	12.9997	13.4086	68744	2	sp|P09471|GNAO_HUMAN	GNAO	P09471
sp|Q9Y490|TLN1_HUMAN	12.9656	12.7532	14.635	14.9849	672740	36	sp|Q9Y490|TLN1_HUMAN;sp|Q9Y4G6|TLN2_HUMAN	TLN1	Q9Y490
sp|P62913|RL11_HUMAN	12.9654	14.0721	13.21	14.0683	148050	3	sp|P62913|RL11_HUMAN	RL11	P62913
sp|P23786|CPT2_HUMAN	12.964	12.703	12.4165	12.9853	358600	3	sp|P23786|CPT2_HUMAN	CPT2	P23786
sp|P29218|IMPA1_HUMAN	12.9589	12.1463	13.7917	13.8678	70178	6	sp|P29218|IMPA1_HUMAN	IMPA1	P29218
sp|P05455|LA_HUMAN	12.9581	12.7624	12.5219	12.2577	27192	4	sp|P05455|LA_HUMAN	LA	P05455
sp|P35637|FUS_HUMAN;sp|Q92804|RBP56_HUMAN	12.9563	12.9068	13.611	13.3646	73395	3	sp|P35637|FUS_HUMAN;sp|Q92804|RBP56_HUMAN	FUS	P35637
sp|P08174|DAF_HUMAN	12.9561	13.6988	12.9655	13.6187	680630	3	sp|P08174|DAF_HUMAN	DAF	P08174
sp|Q04609|FOLH1_HUMAN;sp|Q9HBA9|FOH1B_HUMAN	12.9528	11.3286	12.4159	12.361	46705	3	sp|Q04609|FOLH1_HUMAN;sp|Q9HBA9|FOH1B_HUMAN	FOLH1	Q04609
sp|Q9C004|SPY4_HUMAN	12.9516	12.7865	12.9211	12.7369	8949.1	1	sp|Q9C004|SPY4_HUMAN	SPY4	Q9C004
sp|Q99436|PSB7_HUMAN	12.9508	12.4056	12.7848	12.7382	62963	5	sp|Q99436|PSB7_HUMAN	PSB7	Q99436
sp|Q8NEG4|FA83F_HUMAN	12.9507	12.9014	13.2127	12.503	61422	2	sp|Q8NEG4|FA83F_HUMAN	FA83F	Q8NEG4
sp|Q8TF42|UBS3B_HUMAN	12.9489	12.4501	11.9356	11.9447	36919	2	sp|Q8TF42|UBS3B_HUMAN	UBS3B	Q8TF42
sp|P21333|FLNA_HUMAN	12.9475	13.3079	13.4037	13.9379	177250	12	sp|P21333|FLNA_HUMAN	FLNA	P21333
sp|Q9Y5K6|CD2AP_HUMAN	12.9447	13.0752	11.9323	12.8807	75748	5	sp|Q9Y5K6|CD2AP_HUMAN	CD2AP	Q9Y5K6
sp|P01185|NEU2_HUMAN	12.9446	12.8126	13.163	14.3664	176420	3	sp|P01185|NEU2_HUMAN	NEU2	P01185
sp|Q15369|ELOC_HUMAN	12.9444	14.493	13.9758	14.2502	119830	8	sp|Q15369|ELOC_HUMAN	ELOC	Q15369
sp|Q16890|TPD53_HUMAN	12.9427	12.931	12.3227	13.3867	21953	1	sp|Q16890|TPD53_HUMAN	TPD53	Q16890
sp|O00219|HYAS3_HUMAN	12.942	12.0239	11.6918	14.0322	119580	6	sp|O00219|HYAS3_HUMAN	HYAS3	O00219
sp|P46783|RS10_HUMAN;sp|Q9NQ39|RS10L_HUMAN	12.9413	12.5475	12.0936	13.0977	78297	4	sp|P46783|RS10_HUMAN;sp|Q9NQ39|RS10L_HUMAN	RS10	P46783
sp|Q9UK76|JUPI1_HUMAN	12.937	13.939	15.6576	15.6742	297940	9	sp|Q9UK76|JUPI1_HUMAN	JUPI1	Q9UK76
sp|O15067|PUR4_HUMAN	12.9299	12.1587	13.2609	13.2789	10812	1	sp|O15067|PUR4_HUMAN	PUR4	O15067
sp|P05161|ISG15_HUMAN	12.9298	12.634	12.9336	12.4635	22728	3	sp|P05161|ISG15_HUMAN	ISG15	P05161
sp|P62701|RS4X_HUMAN	12.9268	13.2395	12.9424	11.8477	92270	4	sp|P62701|RS4X_HUMAN;sp|P22090|RS4Y1_HUMAN	RS4X	P62701
sp|O75506|HSBP1_HUMAN	12.9267	12.9768	14.1518	13.6229	73749	6	sp|O75506|HSBP1_HUMAN	HSBP1	O75506
sp|Q99615|DNJC7_HUMAN	12.9235	13.3249	13.3004	13.3974	44113	3	sp|Q99615|DNJC7_HUMAN	DNJC7	Q99615
sp|Q99618|CDCA3_HUMAN	12.9193	13.6203	12.0706	13.2705	41572	4	sp|Q99618|CDCA3_HUMAN	CDCA3	Q99618
sp|Q8WUM9|S20A1_HUMAN	12.9186	14.8467	17.3841	17.2464	1047800	14	sp|Q8WUM9|S20A1_HUMAN	S20A1	Q8WUM9
sp|P07741|APT_HUMAN	12.9182	11.6913	12.811	13.2715	45408	5	sp|P07741|APT_HUMAN	APT	P07741
sp|P25101|EDNRA_HUMAN	12.9144	13.4989	13.8597	14.0051	73417	4	sp|P25101|EDNRA_HUMAN	EDNRA	P25101
sp|Q9H246|CA021_HUMAN	12.9085	13.061	13.4971	13.1524	45467	6	sp|Q9H246|CA021_HUMAN	CA021	Q9H246
sp|O14493|CLD4_HUMAN;sp|O95484|CLD9_HUMAN;sp|P56747|CLD6_HUMAN;sp|O15551|CLD3_HUMAN	12.9081	13.4023	12.7912	13.4093	124010	4	sp|O14493|CLD4_HUMAN;sp|O95484|CLD9_HUMAN;sp|P56747|CLD6_HUMAN;sp|O15551|CLD3_HUMAN	CLD4	O14493
sp|A2A3N6|PIPSL_HUMAN	12.908	13.6855	12.3975	11.8318	55959	3	sp|A2A3N6|PIPSL_HUMAN	PIPSL	A2A3N6
sp|P30566|PUR8_HUMAN	12.9055	13.2392	13.1111	13.5552	6961.2	1	sp|P30566|PUR8_HUMAN	PUR8	P30566
sp|Q8NDI1|EHBP1_HUMAN	12.9042	13.3136	13.0234	13.3085	21633	2	sp|Q8NDI1|EHBP1_HUMAN	EHBP1	Q8NDI1
sp|P09960|LKHA4_HUMAN	12.9019	13.0731	14.9144	15.1429	465880	22	sp|P09960|LKHA4_HUMAN	LKHA4	P09960
sp|Q9H9K5|MER34_HUMAN	12.9016	13.6867	13.5281	13.0083	274460	3	sp|Q9H9K5|MER34_HUMAN	MER34	Q9H9K5
sp|O15127|SCAM2_HUMAN	12.8959	12.1781	12.6506	12.5352	30234	2	sp|O15127|SCAM2_HUMAN	SCAM2	O15127
sp|P56537|IF6_HUMAN	12.895	12.7828	14.7779	14.7206	214740	7	sp|P56537|IF6_HUMAN	IF6	P56537
sp|P20936|RASA1_HUMAN	12.8941	12.6529	12.5714	12.6988	7345.1	1	sp|P20936|RASA1_HUMAN	RASA1	P20936
sp|Q9UMY4|SNX12_HUMAN;sp|O60493|SNX3_HUMAN	12.8931	13.1114	12.817	12.8073	23096	1	sp|Q9UMY4|SNX12_HUMAN;sp|O60493|SNX3_HUMAN	SNX12	Q9UMY4
sp|P12956|XRCC6_HUMAN	12.8911	12.3739	13.8052	14.0001	106430	5	sp|P12956|XRCC6_HUMAN	XRCC6	P12956
sp|P35579|MYH9_HUMAN	12.8903	11.8916	15.171	15.3015	946110	43	sp|P35579|MYH9_HUMAN;sp|P35749|MYH11_HUMAN;sp|Q7Z406|MYH14_HUMAN;sp|P35580|MYH10_HUMAN	MYH9	P35579
sp|Q9P242|NYAP2_HUMAN	12.8878	12.76	12.631	13.16	21449	1	sp|Q9P242|NYAP2_HUMAN	NYAP2	Q9P242
sp|O00445|SYT5_HUMAN	12.8854	12.429	13.886	13.8847	107860	6	sp|O00445|SYT5_HUMAN	SYT5	O00445
sp|Q16543|CDC37_HUMAN	12.885	11.6368	14.8799	15.2493	345170	10	sp|Q16543|CDC37_HUMAN	CDC37	Q16543
sp|Q9UN71|PCDGG_HUMAN;sp|Q9Y5G0|PCDGH_HUMAN;sp|Q9Y5F6|PCDGM_HUMAN;sp|Q9Y5F7|PCDGL_HUMAN;sp|Q9Y5H3|PCDGA_HUMAN;sp|Q9Y5H2|PCDGB_HUMAN;sp|Q9UN70|PCDGK_HUMAN;sp|O60330|PCDGC_HUMAN;sp|Q9Y5H1|PCDG2_HUMAN;sp|Q9Y5H0|PCDG3_HUMAN;sp|Q9Y5G7|PCDG6_HUMAN;sp|Q9Y5G4|PCDG9_HUMAN;sp|Q9Y5G5|PCDG8_HUMAN;sp|Q9Y5G6|PCDG7_HUMAN;sp|Q9Y5G8|PCDG5_HUMAN;sp|Q9Y5H4|PCDG1_HUMAN;sp|Q9Y5G2|PCDGE_HUMAN;sp|Q9Y5F9|PCDGI_HUMAN;sp|…	12.8843	12.7031	12.6342	12.9864	17974	1	sp|Q9UN71|PCDGG_HUMAN;sp|Q9Y5G0|PCDGH_HUMAN;sp|Q9Y5F6|PCDGM_HUMAN;sp|Q9Y5F7|PCDGL_HUMAN;sp|Q9Y5H3|PCDGA_HUMAN;sp|Q9Y5H2|PCDGB_HUMAN;sp|Q9UN70|PCDGK_HUMAN;sp|O60330|PCDGC_HUMAN;sp|Q9Y5H1|PCDG2_HUMAN;sp|Q9Y5H0|PCDG3_HUMAN;sp|Q9Y5G7|PCDG6_HUMAN;sp|Q9Y5G4|PCDG9_HUMAN;sp|Q9Y5G5|PCDG8_HUMAN;sp|Q9Y5G6|PCDG7_HUMAN;sp|Q9Y5G8|PCDG5_HUMAN;sp|Q9Y5H4|PCDG1_HUMAN;sp|Q9Y5G2|PCDGE_HUMAN;sp|Q9Y5F9|PCDGI_HUMAN;sp|…	PCDGG	Q9UN71
sp|P48444|COPD_HUMAN	12.8839	13.7791	12.8735	13.2506	11761	1	sp|P48444|COPD_HUMAN	COPD	P48444
sp|O95208|EPN2_HUMAN	12.8838	13.0681	12.4876	13.2719	74267	5	sp|O95208|EPN2_HUMAN	EPN2	O95208
sp|P15559|NQO1_HUMAN	12.8836	12.5973	12.028	12.6121	50411	3	sp|P15559|NQO1_HUMAN	NQO1	P15559
sp|Q13491|GPM6B_HUMAN	12.8835	12.4349	12.4405	12.5634	14955	3	sp|Q13491|GPM6B_HUMAN	GPM6B	Q13491
sp|Q6UWR7|ENPP6_HUMAN	12.8778	12.6396	12.7786	12.8203	32189	3	sp|Q6UWR7|ENPP6_HUMAN	ENPP6	Q6UWR7
sp|Q96G03|PGM2_HUMAN	12.8746	12.8118	12.7601	12.8303	98250	6	sp|Q96G03|PGM2_HUMAN	PGM2	Q96G03
sp|P54819|KAD2_HUMAN	12.8746	12.4313	12.8111	12.8879	52660	4	sp|P54819|KAD2_HUMAN	KAD2	P54819
sp|Q9UBN6|TR10D_HUMAN	12.8723	13.2401	12.6565	12.391	39785	2	sp|Q9UBN6|TR10D_HUMAN	TR10D	Q9UBN6
sp|P68871|HBB_HUMAN;sp|P02042|HBD_HUMAN	12.872	13.3004	13.8495	13.2564	115030	5	sp|P68871|HBB_HUMAN;sp|P02042|HBD_HUMAN	HBB	P68871
sp|P10321|HLAC_HUMAN	12.8718	13.3047	12.4964	13.3004	107240	6	sp|P10321|HLAC_HUMAN	HLAC	P10321
sp|Q9HB71|CYBP_HUMAN	12.8715	13.2751	15.2279	15.5111	173580	4	sp|Q9HB71|CYBP_HUMAN	CYBP	Q9HB71
sp|P22102|PUR2_HUMAN	12.8654	12.9355	13.8713	13.4601	59135	5	sp|P22102|PUR2_HUMAN	PUR2	P22102
sp|P26640|SYVC_HUMAN	12.863	13.4427	12.9	13.2112	8056.7	2	sp|P26640|SYVC_HUMAN	SYVC	P26640
sp|Q14914|PTGR1_HUMAN	12.8618	13.4936	12.7546	13.5907	56197	5	sp|Q14914|PTGR1_HUMAN	PTGR1	Q14914
sp|Q9UHD8|SEPT9_HUMAN	12.861	12.9571	12.1267	13.5414	18679	2	sp|Q9UHD8|SEPT9_HUMAN	2021-09-09	Q9UHD8
sp|P17655|CAN2_HUMAN	12.8602	13.0527	13.4452	12.9143	31330	3	sp|P17655|CAN2_HUMAN	CAN2	P17655
sp|Q13418|ILK_HUMAN	12.8602	12.7206	13.4399	12.0879	55768	3	sp|Q13418|ILK_HUMAN	ILK	Q13418
sp|Q9BVK6|TMED9_HUMAN	12.86	14.1966	11.916	12.2882	700780	6	sp|Q9BVK6|TMED9_HUMAN	TMED9	Q9BVK6
sp|O95197|RTN3_HUMAN	12.8555	12.1565	12.7089	12.6092	24534	3	sp|O95197|RTN3_HUMAN	RTN3	O95197
sp|Q6NZI2|CAVN1_HUMAN	12.853	13.1108	13.628	13.795	112540	8	sp|Q6NZI2|CAVN1_HUMAN	CAVN1	Q6NZI2
sp|P48729|KC1A_HUMAN;sp|Q8N752|KC1AL_HUMAN	12.8466	12.9755	14.9977	15.116	331200	13	sp|P48729|KC1A_HUMAN;sp|Q8N752|KC1AL_HUMAN	KC1A	P48729
sp|Q13347|EIF3I_HUMAN	12.8424	12.5797	13.636	12.589	61441	2	sp|Q13347|EIF3I_HUMAN	EIF3I	Q13347
sp|Q9BVG4|PBDC1_HUMAN	12.8421	13.3869	13.297	13.3752	17712	1	sp|Q9BVG4|PBDC1_HUMAN	PBDC1	Q9BVG4
sp|P31151|S10A7_HUMAN;sp|Q86SG5|S1A7A_HUMAN	12.8412	13.9491	12.3003	12.7567	117960	5	sp|P31151|S10A7_HUMAN;sp|Q86SG5|S1A7A_HUMAN	S10A7	P31151
sp|Q96DX4|RSPRY_HUMAN	12.8405	13.5906	13.9961	14.336	98175	7	sp|Q96DX4|RSPRY_HUMAN	RSPRY	Q96DX4
sp|A4D1S0|KLRG2_HUMAN	12.8385	13.2168	16.0414	15.7853	402240	7	sp|A4D1S0|KLRG2_HUMAN	KLRG2	A4D1S0
sp|P62851|RS25_HUMAN	12.8384	11.64	15.2123	15.3575	215300	5	sp|P62851|RS25_HUMAN	RS25	P62851
sp|Q14974|IMB1_HUMAN	12.8364	11.7993	14.8143	14.9732	286390	12	sp|Q14974|IMB1_HUMAN	IMB1	Q14974
sp|Q9NZD2|GLTP_HUMAN	12.8358	13.5707	12.8653	13.0655	5439.5	1	sp|Q9NZD2|GLTP_HUMAN	GLTP	Q9NZD2
sp|Q9HB09|B2L12_HUMAN	12.8351	13.2685	13.5676	12.9651	46833	3	sp|Q9HB09|B2L12_HUMAN	B2L12	Q9HB09
sp|P62314|SMD1_HUMAN	12.8315	13.3784	12.7093	12.8429	18762	1	sp|P62314|SMD1_HUMAN	SMD1	P62314
sp|P15514|AREG_HUMAN	12.8304	12.9019	13.4939	12.1933	55080	3	sp|P15514|AREG_HUMAN	AREG	P15514
sp|P37235|HPCL1_HUMAN;sp|P84074|HPCA_HUMAN;sp|P61601|NCALD_HUMAN	12.8294	12.2187	12.5756	13.1213	33923	3	sp|P37235|HPCL1_HUMAN;sp|P84074|HPCA_HUMAN;sp|P61601|NCALD_HUMAN	HPCL1	P37235
sp|P05388|RLA0_HUMAN;sp|Q8NHW5|RLA0L_HUMAN	12.826	13.704	12.4945	13.7124	72932	5	sp|P05388|RLA0_HUMAN;sp|Q8NHW5|RLA0L_HUMAN	RLA0	P05388
sp|P62857|RS28_HUMAN	12.8257	12.1161	15.0643	15.4649	271150	6	sp|P62857|RS28_HUMAN	RS28	P62857
sp|Q13835|PKP1_HUMAN	12.8243	12.3824	11.6412	12.6399	28151	2	sp|Q13835|PKP1_HUMAN	PKP1	Q13835
sp|P69905|HBA_HUMAN	12.8229	13.6296	12.1513	12.2305	23458	2	sp|P69905|HBA_HUMAN	HBA	P69905
sp|Q9UJU6|DBNL_HUMAN	12.8217	14.0534	12.4397	13.3849	29848	3	sp|Q9UJU6|DBNL_HUMAN	DBNL	Q9UJU6
sp|P63151|2ABA_HUMAN	12.8217	13.9203	14.3071	14.4893	103550	4	sp|P63151|2ABA_HUMAN	2ABA	P63151
sp|P60228|EIF3E_HUMAN	12.8194	12.2775	12.5423	11.8011	22901	2	sp|P60228|EIF3E_HUMAN	EIF3E	P60228
sp|Q04837|SSBP_HUMAN	12.8194	14.4831	15.4373	14.3959	213620	9	sp|Q04837|SSBP_HUMAN	SSBP	Q04837
sp|Q9UQN3|CHM2B_HUMAN	12.8175	14.7527	16.3104	16.244	486400	9	sp|Q9UQN3|CHM2B_HUMAN;sp|Q92828|COR2A_HUMAN	CHM2B	Q9UQN3
sp|P52569|CTR2_HUMAN	12.8052	13.5767	14.1805	14.4092	103800	6	sp|P52569|CTR2_HUMAN	CTR2	P52569
sp|P15880|RS2_HUMAN	12.8041	13.5939	11.962	12.9183	63546	5	sp|P15880|RS2_HUMAN	RS2	P15880
sp|Q6EEV6|SUMO4_HUMAN;sp|P61956|SUMO2_HUMAN;sp|P55854|SUMO3_HUMAN	12.801	13.4059	12.9739	12.6465	345840	4	sp|Q6EEV6|SUMO4_HUMAN;sp|P61956|SUMO2_HUMAN;sp|P55854|SUMO3_HUMAN	SUMO4	Q6EEV6
sp|Q8WUX1|S38A5_HUMAN	12.7981	12.5071	20.2809	19.9506	11916000	16	sp|Q8WUX1|S38A5_HUMAN	S38A5	Q8WUX1
sp|P08243|ASNS_HUMAN	12.7951	12.7776	13.6701	14.0265	112580	7	sp|P08243|ASNS_HUMAN	ASNS	P08243
sp|P27824|CALX_HUMAN	12.7922	12.6715	14.2549	14.4618	286320	13	sp|P27824|CALX_HUMAN	CALX	P27824
sp|Q16851|UGPA_HUMAN	12.7915	13.3853	13.0252	12.7591	29363	2	sp|Q16851|UGPA_HUMAN	UGPA	Q16851
sp|Q00839|HNRPU_HUMAN	12.79	12.198	13.602	13.3821	2235.7	1	sp|Q00839|HNRPU_HUMAN	HNRPU	Q00839
sp|Q01970|PLCB3_HUMAN	12.7893	13.0965	13.8126	13.9202	118730	8	sp|Q01970|PLCB3_HUMAN	PLCB3	Q01970
sp|Q9HC38|GLOD4_HUMAN	12.7871	13.9319	15.9654	16.3693	426500	7	sp|Q9HC38|GLOD4_HUMAN	GLOD4	Q9HC38
sp|Q9NR45|SIAS_HUMAN	12.787	12.9042	13.3451	13.5181	173230	5	sp|Q9NR45|SIAS_HUMAN	SIAS	Q9NR45
sp|P48059|LIMS1_HUMAN	12.7835	13.7143	12.9298	13.1904	57652	2	sp|P48059|LIMS1_HUMAN	LIMS1	P48059
sp|Q96CX2|KCD12_HUMAN	12.7813	12.781	12.423	13.0438	52023	4	sp|Q96CX2|KCD12_HUMAN	KCD12	Q96CX2
sp|Q13636|RAB31_HUMAN	12.7768	12.9796	12.7621	13.1892	85658	8	sp|Q13636|RAB31_HUMAN	RAB31	Q13636
sp|Q12907|LMAN2_HUMAN	12.7731	12.6915	12.3372	13.6692	14698	1	sp|Q12907|LMAN2_HUMAN	LMAN2	Q12907
sp|P00568|KAD1_HUMAN	12.7725	14.3677	13.0658	14.8378	157600	7	sp|P00568|KAD1_HUMAN	KAD1	P00568
sp|P35625|TIMP3_HUMAN	12.7711	12.3846	12.3471	12.6695	43202	2	sp|P35625|TIMP3_HUMAN	TIMP3	P35625
sp|P25705|ATPA_HUMAN	12.7704	13.6353	13.7529	12.6313	70620	7	sp|P25705|ATPA_HUMAN	ATPA	P25705
sp|P05783|K1C18_HUMAN	12.7663	12.7539	13.686	14.0377	110000	8	sp|P05783|K1C18_HUMAN	K1C18	P05783
sp|P09382|LEG1_HUMAN	12.7624	13.7912	15.7186	15.9294	342900	9	sp|P09382|LEG1_HUMAN	LEG1	P09382
sp|P62310|LSM3_HUMAN	12.762	13.6713	12.4847	12.3673	40873	2	sp|P62310|LSM3_HUMAN	LSM3	P62310
sp|Q9BSA4|TTYH2_HUMAN	12.7603	12.3838	14.9419	14.9679	428280	13	sp|Q9BSA4|TTYH2_HUMAN	TTYH2	Q9BSA4
sp|Q9H799|CPLN1_HUMAN	12.7594	11.8616	12.8281	12.7122	39021	2	sp|Q9H799|CPLN1_HUMAN	CPLN1	Q9H799
sp|Q15785|TOM34_HUMAN	12.7584	12.9312	11.9257	11.4664	28916	2	sp|Q15785|TOM34_HUMAN	TOM34	Q15785
sp|Q12884|SEPR_HUMAN	12.7571	13.2008	13.068	13.4044	6245.3	1	sp|Q12884|SEPR_HUMAN	SEPR	Q12884
sp|Q86VN1|VPS36_HUMAN	12.7559	12.4657	17.0188	17.1175	2343400	39	sp|Q86VN1|VPS36_HUMAN	VPS36	Q86VN1
sp|Q16181|SEPT7_HUMAN	12.7537	13.1602	12.2996	12.7188	80664	7	sp|Q16181|SEPT7_HUMAN;sp|Q6ZU15|SEP14_HUMAN	2021-09-07	Q16181
sp|Q9UGH3|S23A2_HUMAN	12.7535	13.0285	11.4689	13.9824	85705	4	sp|Q9UGH3|S23A2_HUMAN	S23A2	Q9UGH3
sp|Q02750|MP2K1_HUMAN	12.753	14.1899	12.7396	12.41	42846	2	sp|Q02750|MP2K1_HUMAN	MP2K1	Q02750
sp|Q14204|DYHC1_HUMAN	12.7526	13.3165	12.1374	13.4037	29212	3	sp|Q14204|DYHC1_HUMAN	DYHC1	Q14204
sp|O43157|PLXB1_HUMAN	12.7512	13.1863	12.3797	13.3636	42473	4	sp|O43157|PLXB1_HUMAN	PLXB1	O43157
sp|Q13162|PRDX4_HUMAN	12.7506	13.5152	13.0434	12.1224	55892	4	sp|Q13162|PRDX4_HUMAN	PRDX4	Q13162
sp|Q9BUF5|TBB6_HUMAN	12.7486	12.1849	12.4962	12.9829	83578	3	sp|Q9BUF5|TBB6_HUMAN	TBB6	Q9BUF5
sp|O43567|RNF13_HUMAN	12.7476	13.9956	11.6953	13.6591	72426	5	sp|O43567|RNF13_HUMAN	RNF13	O43567
sp|O00231|PSD11_HUMAN	12.7472	13.1782	13.2289	13.4104	31526	3	sp|O00231|PSD11_HUMAN	PSD11	O00231
sp|Q9BTT6|LRRC1_HUMAN	12.7393	13.5342	14.3014	14.1634	88997	4	sp|Q9BTT6|LRRC1_HUMAN	LRRC1	Q9BTT6
sp|P54136|SYRC_HUMAN	12.7374	12.9558	14.4373	14.6932	132850	9	sp|P54136|SYRC_HUMAN	SYRC	P54136
sp|Q658P3|STEA3_HUMAN	12.7372	12.8606	15.1378	15.3099	311450	10	sp|Q658P3|STEA3_HUMAN	STEA3	Q658P3
sp|Q15599|NHRF2_HUMAN	12.7341	13.2578	14.8739	15.231	309690	14	sp|Q15599|NHRF2_HUMAN	NHRF2	Q15599
sp|Q8TF65|GIPC2_HUMAN	12.7319	13.5561	12.1672	12.9823	182520	4	sp|Q8TF65|GIPC2_HUMAN	GIPC2	Q8TF65
sp|Q96KP4|CNDP2_HUMAN	12.727	14.134	15.2308	15.3278	446110	17	sp|Q96KP4|CNDP2_HUMAN	CNDP2	Q96KP4
sp|P01859|IGHG2_HUMAN	12.721	12.6542	13.4152	13.7445	38135	2	sp|P01859|IGHG2_HUMAN	IGHG2	P01859
sp|P38606|VATA_HUMAN	12.7206	11.8711	14.6401	14.827	246030	16	sp|P38606|VATA_HUMAN	VATA	P38606
sp|Q04721|NOTC2_HUMAN	12.7178	13.7805	12.8934	12.175	74604	4	sp|Q04721|NOTC2_HUMAN	NOTC2	Q04721
sp|Q9Y3F4|STRAP_HUMAN	12.7134	12.6207	14.522	14.7433	221510	10	sp|Q9Y3F4|STRAP_HUMAN	STRAP	Q9Y3F4
sp|Q9UNP9|PPIE_HUMAN	12.7124	13.5043	13.5389	13.3476	230340	3	sp|Q9UNP9|PPIE_HUMAN	PPIE	Q9UNP9
sp|Q96CT7|CC124_HUMAN	12.7081	12.8927	12.8165	12.7541	47538	3	sp|Q96CT7|CC124_HUMAN	CC124	Q96CT7
sp|P51511|MMP15_HUMAN	12.7049	13.8187	12.3658	13.5748	19999	2	sp|P51511|MMP15_HUMAN	MMP15	P51511
sp|O95721|SNP29_HUMAN	12.7019	12.5871	12.5689	12.9803	47303	3	sp|O95721|SNP29_HUMAN	SNP29	O95721
sp|Q96EK6|GNA1_HUMAN	12.6995	13.588	13.097	13.9231	41423	2	sp|Q96EK6|GNA1_HUMAN	GNA1	Q96EK6
sp|Q9BRT3|MIEN1_HUMAN	12.6939	12.9041	12.4963	12.3983	37953	2	sp|Q9BRT3|MIEN1_HUMAN	MIEN1	Q9BRT3
sp|P35270|SPRE_HUMAN	12.6939	13.7298	12.5262	12.4387	16899	1	sp|P35270|SPRE_HUMAN	SPRE	P35270
sp|P55036|PSMD4_HUMAN	12.6937	13.284	12.2818	12.6603	133490	4	sp|P55036|PSMD4_HUMAN	PSMD4	P55036
sp|Q8WV24|PHLA1_HUMAN	12.6884	12.4342	11.718	13.6085	40849	2	sp|Q8WV24|PHLA1_HUMAN	PHLA1	Q8WV24
sp|P49915|GUAA_HUMAN	12.6869	13.1042	12.8048	13.2727	6707.6	1	sp|P49915|GUAA_HUMAN	GUAA	P49915
sp|P20338|RAB4A_HUMAN;sp|P61018|RAB4B_HUMAN	12.6869	14.9475	13.4738	12.4289	93326	5	sp|P20338|RAB4A_HUMAN;sp|P61018|RAB4B_HUMAN	RAB4A	P20338
sp|P61758|PFD3_HUMAN	12.6816	13.1761	13.5871	13.3338	2141.6	1	sp|P61758|PFD3_HUMAN	PFD3	P61758
sp|Q9H6S3|ES8L2_HUMAN	12.68	12.482	14.8798	14.8136	173170	7	sp|Q9H6S3|ES8L2_HUMAN	ES8L2	Q9H6S3
sp|Q96AC1|FERM2_HUMAN	12.6767	13.5759	15.0796	14.4206	147040	7	sp|Q96AC1|FERM2_HUMAN	FERM2	Q96AC1
sp|Q9Y2V2|CHSP1_HUMAN	12.6749	11.773	12.0395	12.12	10369	1	sp|Q9Y2V2|CHSP1_HUMAN	CHSP1	Q9Y2V2
sp|P51674|GPM6A_HUMAN	12.6709	12.0252	15.7159	15.3798	267080	8	sp|P51674|GPM6A_HUMAN	GPM6A	P51674
sp|P23470|PTPRG_HUMAN	12.6685	14.2161	12.2717	13.3255	18253	3	sp|P23470|PTPRG_HUMAN	PTPRG	P23470
sp|P57735|RAB25_HUMAN	12.6669	13.1284	12.2782	12.2312	21941	1	sp|P57735|RAB25_HUMAN	RAB25	P57735
sp|Q16644|MAPK3_HUMAN	12.6634	12.5626	12.7598	13.3562	8661.2	1	sp|Q16644|MAPK3_HUMAN	MAPK3	Q16644
sp|P08581|MET_HUMAN	12.6597	11.8146	15.2301	15.2583	484500	19	sp|P08581|MET_HUMAN	MET	P08581
sp|P11171|EPB41_HUMAN	12.6593	12.3931	12.5982	12.4953	16419	2	sp|P11171|EPB41_HUMAN	EPB41	P11171
sp|P04259|K2C6B_HUMAN	12.658	12.8023	12.0182	13.2429	15307	1	sp|P04259|K2C6B_HUMAN	K2C6B	P04259
sp|Q9Y6I3|EPN1_HUMAN	12.653	13.5728	12.4378	12.4419	109900	6	sp|Q9Y6I3|EPN1_HUMAN	EPN1	Q9Y6I3
sp|Q9NVD7|PARVA_HUMAN	12.6497	13.0492	11.2177	12.1395	107770	5	sp|Q9NVD7|PARVA_HUMAN	PARVA	Q9NVD7
sp|O00592|PODXL_HUMAN	12.6469	13.6469	13.0285	14.0168	175960	3	sp|O00592|PODXL_HUMAN	PODXL	O00592
sp|P63244|RACK1_HUMAN	12.6437	13.942	12.754	12.6744	272770	8	sp|P63244|RACK1_HUMAN	RACK1	P63244
sp|O95861|BPNT1_HUMAN	12.6435	12.6198	13.8162	12.5939	24516	3	sp|O95861|BPNT1_HUMAN	BPNT1	O95861
sp|P09936|UCHL1_HUMAN	12.6415	13.8627	12.4678	13.5662	280980	6	sp|P09936|UCHL1_HUMAN	UCHL1	P09936
sp|Q9UIQ6|LCAP_HUMAN	12.6409	12.3983	14.7448	15.065	358640	19	sp|Q9UIQ6|LCAP_HUMAN	LCAP	Q9UIQ6
sp|Q9H4G4|GAPR1_HUMAN	12.6398	13.4734	13.7813	14.538	118460	6	sp|Q9H4G4|GAPR1_HUMAN	GAPR1	Q9H4G4
sp|P31153|METK2_HUMAN	12.6392	12.2039	12.5092	12.0177	148400	4	sp|P31153|METK2_HUMAN	METK2	P31153
sp|Q9NVA2|SEP11_HUMAN	12.6262	12.9358	13.2734	13.5228	67129	5	sp|Q9NVA2|SEP11_HUMAN;sp|Q14141|SEPT6_HUMAN	2021-09-11	Q9NVA2
sp|P09104|ENOG_HUMAN	12.625	12.6565	14.211	14.4255	731000	8	sp|P09104|ENOG_HUMAN	ENOG	P09104
sp|O75369|FLNB_HUMAN	12.6231	12.7895	15.0688	15.2502	983710	42	sp|O75369|FLNB_HUMAN	FLNB	O75369
sp|Q96CF2|CHM4C_HUMAN	12.6211	13.8782	14.533	14.4474	131580	8	sp|Q96CF2|CHM4C_HUMAN	CHM4C	Q96CF2
sp|P11047|LAMC1_HUMAN	12.6152	14.3588	14.2737	14.5314	319090	16	sp|P11047|LAMC1_HUMAN	LAMC1	P11047
sp|Q96H20|SNF8_HUMAN	12.6078	12.4879	17.6689	17.5677	1188800	16	sp|Q96H20|SNF8_HUMAN	SNF8	Q96H20
sp|P23469|PTPRE_HUMAN	12.6075	13.2926	12.9076	13.4917	40213	2	sp|P23469|PTPRE_HUMAN	PTPRE	P23469
sp|Q9BZ29|DOCK9_HUMAN	12.6059	12.4327	14.2452	12.3763	69652	5	sp|Q9BZ29|DOCK9_HUMAN	DOCK9	Q9BZ29
sp|Q9NY26|S39A1_HUMAN	12.6049	12.7859	12.3123	13.9766	64068	2	sp|Q9NY26|S39A1_HUMAN	S39A1	Q9NY26
sp|Q8NEZ2|VP37A_HUMAN	12.602	13.1286	13.0641	13.7117	55785	4	sp|Q8NEZ2|VP37A_HUMAN	VP37A	Q8NEZ2
sp|P36894|BMR1A_HUMAN	12.6009	13.1626	11.902	13.3691	20180	2	sp|P36894|BMR1A_HUMAN	BMR1A	P36894
sp|P36969|GPX4_HUMAN	12.599	13.8962	12.9586	12.3632	73377	4	sp|P36969|GPX4_HUMAN	GPX4	P36969
sp|Q9C0D5|TANC1_HUMAN	12.5965	12.985	12.3474	12.3331	11476	1	sp|Q9C0D5|TANC1_HUMAN	TANC1	Q9C0D5
sp|Q99623|PHB2_HUMAN	12.5958	13.168	13.4147	13.8983	31432	3	sp|Q99623|PHB2_HUMAN	PHB2	Q99623
sp|P13667|PDIA4_HUMAN	12.595	14.1776	12.9548	13.0632	5099.2	1	sp|P13667|PDIA4_HUMAN	PDIA4	P13667
sp|P48556|PSMD8_HUMAN	12.5931	13.921	13.6937	13.5548	57805	4	sp|P48556|PSMD8_HUMAN	PSMD8	P48556
sp|Q15262|PTPRK_HUMAN	12.5887	13.1166	16.1406	16.2782	773270	14	sp|Q15262|PTPRK_HUMAN;sp|P28827|PTPRM_HUMAN	PTPRK	Q15262
sp|P27487|DPP4_HUMAN	12.5866	12.2759	13.4569	13.5308	25026	3	sp|P27487|DPP4_HUMAN	DPP4	P27487
sp|Q9NVS9|PNPO_HUMAN	12.5857	12.8674	12.8253	12.2571	37811	2	sp|Q9NVS9|PNPO_HUMAN	PNPO	Q9NVS9
sp|P54652|HSP72_HUMAN	12.5825	14.0476	12.3596	13.5293	67039	5	sp|P54652|HSP72_HUMAN	HSP72	P54652
sp|Q9HD67|MYO10_HUMAN	12.5808	13.612	12.7	12.4036	24325	3	sp|Q9HD67|MYO10_HUMAN	MYO10	Q9HD67
sp|P53396|ACLY_HUMAN	12.5739	13.5432	14.0276	14.9057	158720	8	sp|P53396|ACLY_HUMAN	ACLY	P53396
sp|P04179|SODM_HUMAN	12.5704	13.6202	12.5223	13.1429	48431	3	sp|P04179|SODM_HUMAN	SODM	P04179
sp|P31025|LCN1_HUMAN;sp|Q5VSP4|LC1L1_HUMAN	12.5703	13.5512	12.481	11.7304	115890	3	sp|P31025|LCN1_HUMAN;sp|Q5VSP4|LC1L1_HUMAN	LCN1	P31025
sp|Q6P4Q7|CNNM4_HUMAN	12.5656	13.9977	12.5849	13.0991	62222	5	sp|Q6P4Q7|CNNM4_HUMAN;sp|Q8NE01|CNNM3_HUMAN	CNNM4	Q6P4Q7
sp|Q14677|EPN4_HUMAN	12.563	13.1887	12.9514	12.9792	26839	2	sp|Q14677|EPN4_HUMAN	EPN4	Q14677
sp|Q8IY22|CMIP_HUMAN	12.5559	13.6888	13.6249	12.8391	50852	3	sp|Q8IY22|CMIP_HUMAN	CMIP	Q8IY22
sp|Q9Y3A5|SBDS_HUMAN	12.5553	13.8148	12.9748	12.184	28314	2	sp|Q9Y3A5|SBDS_HUMAN	SBDS	Q9Y3A5
sp|P06748|NPM_HUMAN	12.5552	12.4647	14.4416	13.7804	156110	9	sp|P06748|NPM_HUMAN	NPM	P06748
sp|Q8N6T3|ARFG1_HUMAN	12.5529	13.989	12.4376	13.3944	16172	2	sp|Q8N6T3|ARFG1_HUMAN	ARFG1	Q8N6T3
sp|P29033|CXB2_HUMAN	12.5515	12.1412	12.2363	11.7191	261810	5	sp|P29033|CXB2_HUMAN	CXB2	P29033
sp|O15269|SPTC1_HUMAN	12.5454	13.8525	12.4312	12.1753	62051	3	sp|O15269|SPTC1_HUMAN	SPTC1	O15269
sp|O43504|LTOR5_HUMAN	12.5401	11.3806	15.5808	15.7984	325300	10	sp|O43504|LTOR5_HUMAN	LTOR5	O43504
sp|Q9BRK5|CAB45_HUMAN	12.5377	12.2349	11.8205	13.3013	7387.1	1	sp|Q9BRK5|CAB45_HUMAN	CAB45	Q9BRK5
sp|Q96BN6|F149B_HUMAN	12.5365	13.0465	12.2903	12.5155	756310	3	sp|Q96BN6|F149B_HUMAN	F149B	Q96BN6
sp|P62495|ERF1_HUMAN	12.5336	13.3832	11.8144	12.269	80626	4	sp|P62495|ERF1_HUMAN	ERF1	P62495
sp|Q8NBI5|S43A3_HUMAN	12.5314	12.4345	16.3797	16.4226	470980	8	sp|Q8NBI5|S43A3_HUMAN	S43A3	Q8NBI5
sp|O94760|DDAH1_HUMAN	12.5309	13.3137	13.3129	13.9037	134630	10	sp|O94760|DDAH1_HUMAN	DDAH1	O94760
sp|P18433|PTPRA_HUMAN	12.5263	13.19	17.1776	17.0532	1248200	24	sp|P18433|PTPRA_HUMAN	PTPRA	P18433
sp|Q9Y4L1|HYOU1_HUMAN	12.5256	12.0188	11.7378	12.789	46974	3	sp|Q9Y4L1|HYOU1_HUMAN	HYOU1	Q9Y4L1
sp|Q04941|PLP2_HUMAN	12.5237	13.2456	12.1407	13.2043	3676100	12	sp|Q04941|PLP2_HUMAN	PLP2	Q04941
sp|O43242|PSMD3_HUMAN	12.5224	12.7911	14.1206	12.135	14734	3	sp|O43242|PSMD3_HUMAN	PSMD3	O43242
sp|P09234|RU1C_HUMAN	12.5203	12.8261	12.367	13.0301	26556	2	sp|P09234|RU1C_HUMAN	RU1C	P09234
sp|Q29980|MICB_HUMAN	12.515	12.8607	11.6385	12.8606	26821	2	sp|Q29980|MICB_HUMAN	MICB	Q29980
sp|O00154|BACH_HUMAN	12.5144	13.1731	12.3713	13.6983	218460	7	sp|O00154|BACH_HUMAN	BACH	O00154
sp|Q13114|TRAF3_HUMAN	12.5093	13.8226	13.2539	13.0222	31051	2	sp|Q13114|TRAF3_HUMAN	TRAF3	Q13114
sp|P62266|RS23_HUMAN	12.5056	13.3396	12.5026	13.4802	36399	2	sp|P62266|RS23_HUMAN	RS23	P62266
sp|Q9BUP3|HTAI2_HUMAN	12.5001	14.0627	12.7096	13.1993	79565	6	sp|Q9BUP3|HTAI2_HUMAN	HTAI2	Q9BUP3
sp|P62306|RUXF_HUMAN	12.4994	13.393	13.0135	13.6608	24069	2	sp|P62306|RUXF_HUMAN	RUXF	P62306
sp|Q16576|RBBP7_HUMAN;sp|Q09028|RBBP4_HUMAN	12.4988	12.1467	13.5515	13.5689	79076	3	sp|Q16576|RBBP7_HUMAN;sp|Q09028|RBBP4_HUMAN	RBBP7	Q16576
sp|P35240|MERL_HUMAN	12.4958	12.8473	14.257	14.6636	135690	6	sp|P35240|MERL_HUMAN	MERL	P35240
sp|Q53GA4|PHLA2_HUMAN	12.4906	12.9181	12.628	12.2535	60838	4	sp|Q53GA4|PHLA2_HUMAN	PHLA2	Q53GA4
sp|Q9H7F0|AT133_HUMAN	12.4884	12.5929	12.2607	12.547	27322	2	sp|Q9H7F0|AT133_HUMAN	AT133	Q9H7F0
sp|P33527|MRP1_HUMAN	12.4768	12.2877	16.6068	16.7593	2234600	56	sp|P33527|MRP1_HUMAN;sp|O15438|MRP3_HUMAN	MRP1	P33527
sp|O75368|SH3L1_HUMAN	12.4761	13.6217	12.4415	13.6011	54499	3	sp|O75368|SH3L1_HUMAN	SH3L1	O75368
sp|O94991|SLIK5_HUMAN	12.4758	12.0908	14.8918	15.0763	196550	5	sp|O94991|SLIK5_HUMAN	SLIK5	O94991
sp|P37198|NUP62_HUMAN	12.4741	13.8535	11.9924	12.7881	2654.1	1	sp|P37198|NUP62_HUMAN	NUP62	P37198
sp|Q16555|DPYL2_HUMAN	12.4677	13.3737	14.4695	14.8538	220530	10	sp|Q16555|DPYL2_HUMAN;sp|Q14194|DPYL1_HUMAN	DPYL2	Q16555
sp|P67870|CSK2B_HUMAN	12.4665	13.1135	12.0961	12.6617	204000	5	sp|P67870|CSK2B_HUMAN	CSK2B	P67870
sp|O43570|CAH12_HUMAN	12.4654	12.8474	17.046	17.1825	1351000	15	sp|O43570|CAH12_HUMAN	CAH12	O43570
sp|P61626|LYSC_HUMAN	12.4642	12.4965	11.8691	12.849	238980	4	sp|P61626|LYSC_HUMAN	LYSC	P61626
sp|O15554|KCNN4_HUMAN	12.461	12.6066	12.1477	12.4805	63577	4	sp|O15554|KCNN4_HUMAN	KCNN4	O15554
sp|Q9HAC8|UBTD1_HUMAN	12.4597	13.2418	16.4221	16.4113	614110	9	sp|Q9HAC8|UBTD1_HUMAN	UBTD1	Q9HAC8
sp|P36383|CXG1_HUMAN	12.4534	12.6497	15.497	15.5672	267480	4	sp|P36383|CXG1_HUMAN	CXG1	P36383
sp|P15170|ERF3A_HUMAN;sp|Q8IYD1|ERF3B_HUMAN	12.4493	13.2089	12.8274	13.7787	7030.6	1	sp|P15170|ERF3A_HUMAN;sp|Q8IYD1|ERF3B_HUMAN	ERF3A	P15170
sp|P05067|A4_HUMAN	12.4483	12.3307	12.591	13.1064	85319	2	sp|P05067|A4_HUMAN	A4	P05067
sp|Q9UL15|BAG5_HUMAN	12.4478	12.3771	13.8303	12.285	94185	6	sp|Q9UL15|BAG5_HUMAN	BAG5	Q9UL15
sp|P08134|RHOC_HUMAN	12.4471	13.8197	12.9293	13.2137	119850	3	sp|P08134|RHOC_HUMAN	RHOC	P08134
sp|B2RPK0|HGB1A_HUMAN;sp|P09429|HMGB1_HUMAN	12.4455	12.6567	12.1763	13.196	21683	2	sp|B2RPK0|HGB1A_HUMAN;sp|P09429|HMGB1_HUMAN	HGB1A	B2RPK0
sp|P25789|PSA4_HUMAN	12.4448	13.09	15.4649	15.222	402070	12	sp|P25789|PSA4_HUMAN	PSA4	P25789
sp|Q9UHA4|LTOR3_HUMAN	12.4424	13.3993	12.6582	13.0357	222290	4	sp|Q9UHA4|LTOR3_HUMAN	LTOR3	Q9UHA4
sp|Q8N9N7|LRC57_HUMAN	12.441	16.2077	16.1645	16.2758	685910	12	sp|Q8N9N7|LRC57_HUMAN	LRC57	Q8N9N7
sp|O60462|NRP2_HUMAN	12.441	12.7182	11.9202	12.3696	13991	1	sp|O60462|NRP2_HUMAN	NRP2	O60462
sp|Q8TC26|TM163_HUMAN	12.4364	12.5546	14.6271	14.6801	102570	4	sp|Q8TC26|TM163_HUMAN	TM163	Q8TC26
sp|Q99622|C10_HUMAN	12.4171	12.2255	15.0349	14.3105	178100	10	sp|Q99622|C10_HUMAN	C10	Q99622
sp|P49189|AL9A1_HUMAN	12.4129	12.9659	13.9768	14.384	131810	6	sp|P49189|AL9A1_HUMAN	AL9A1	P49189
sp|O75629|CREG1_HUMAN	12.4121	13.3949	13.6	12.5385	31578	2	sp|O75629|CREG1_HUMAN	CREG1	O75629
sp|P30520|PURA2_HUMAN	12.4088	13.029	13.5644	12.3221	64527	3	sp|P30520|PURA2_HUMAN	PURA2	P30520
sp|Q16222|UAP1_HUMAN	12.3969	13.1109	12.135	11.8894	42754	7	sp|Q16222|UAP1_HUMAN	UAP1	Q16222
sp|P28906|CD34_HUMAN	12.3963	13.2414	12.3911	12.7885	57355	1	sp|P28906|CD34_HUMAN	CD34	P28906
sp|P11717|MPRI_HUMAN	12.3952	13.8296	14.432	14.6603	263540	14	sp|P11717|MPRI_HUMAN	MPRI	P11717
sp|O76082|S22A5_HUMAN	12.3924	12.9535	13.258	13.6853	4724.2	1	sp|O76082|S22A5_HUMAN	S22A5	O76082
sp|P36897|TGFR1_HUMAN	12.3892	14.1907	12.1747	12.3801	56337	3	sp|P36897|TGFR1_HUMAN	TGFR1	P36897
sp|Q99963|SH3G3_HUMAN	12.3881	12.3658	13.2836	12.4373	34953	3	sp|Q99963|SH3G3_HUMAN	SH3G3	Q99963
sp|Q16401|PSMD5_HUMAN	12.3865	12.9606	12.4861	12.33	28508	2	sp|Q16401|PSMD5_HUMAN	PSMD5	Q16401
sp|P52799|EFNB2_HUMAN	12.382	13.0364	15.4043	15.5697	249740	7	sp|P52799|EFNB2_HUMAN	EFNB2	P52799
sp|Q12792|TWF1_HUMAN	12.3817	12.9228	12.6196	13.1179	76117	5	sp|Q12792|TWF1_HUMAN	TWF1	Q12792
sp|Q07157|ZO1_HUMAN	12.3795	12.7813	13.5941	13.7224	114210	9	sp|Q07157|ZO1_HUMAN	ZO1	Q07157
sp|Q9UHE8|STEA1_HUMAN;sp|Q6NZ63|STEAL_HUMAN	12.379	13.4639	11.6188	12.2874	28773	2	sp|Q9UHE8|STEA1_HUMAN;sp|Q6NZ63|STEAL_HUMAN	STEA1	Q9UHE8
sp|P62328|TYB4_HUMAN	12.3754	12.2825	12.5581	12.9106	697730	4	sp|P62328|TYB4_HUMAN	TYB4	P62328
sp|Q13526|PIN1_HUMAN	12.3694	12.3038	14.4051	14.1856	132590	6	sp|Q13526|PIN1_HUMAN	PIN1	Q13526
sp|O95832|CLD1_HUMAN	12.3692	13.3422	12.904	12.6584	193350	3	sp|O95832|CLD1_HUMAN	CLD1	O95832
sp|O15372|EIF3H_HUMAN	12.3689	12.2779	13.5373	12.8041	61335	3	sp|O15372|EIF3H_HUMAN	EIF3H	O15372
sp|P36873|PP1G_HUMAN	12.3651	12.7363	14.7092	15.0896	169310	6	sp|P36873|PP1G_HUMAN	PP1G	P36873
sp|P15260|INGR1_HUMAN	12.363	13.337	15.0072	14.6676	151420	6	sp|P15260|INGR1_HUMAN	INGR1	P15260
sp|Q9UEU0|VTI1B_HUMAN	12.3581	11.635	11.8672	12.7434	23363	3	sp|Q9UEU0|VTI1B_HUMAN	VTI1B	Q9UEU0
sp|P16403|H12_HUMAN;sp|P10412|H14_HUMAN;sp|P16402|H13_HUMAN;sp|P22492|H1T_HUMAN;sp|Q02539|H11_HUMAN	12.3577	12.7634	12.1621	12.3063	137330	3	sp|P16403|H12_HUMAN;sp|P10412|H14_HUMAN;sp|P16402|H13_HUMAN;sp|P22492|H1T_HUMAN;sp|Q02539|H11_HUMAN	H12	P16403
sp|P46778|RL21_HUMAN	12.3565	12.8926	11.6691	13.2535	13950	1	sp|P46778|RL21_HUMAN	RL21	P46778
sp|Q13200|PSMD2_HUMAN	12.354	12.704	14.1877	14.6515	147870	8	sp|Q13200|PSMD2_HUMAN	PSMD2	Q13200
sp|P43490|NAMPT_HUMAN	12.353	13.1353	14.3836	14.9259	133880	7	sp|P43490|NAMPT_HUMAN	NAMPT	P43490
sp|Q9BYT8|NEUL_HUMAN	12.3377	12.7966	12.3744	13.398	35062	2	sp|Q9BYT8|NEUL_HUMAN	NEUL	Q9BYT8
sp|Q9H0H5|RGAP1_HUMAN	12.332	12.9348	15.2715	15.6103	364220	12	sp|Q9H0H5|RGAP1_HUMAN	RGAP1	Q9H0H5
sp|O43776|SYNC_HUMAN	12.33	13.2128	12.0104	12.556	36496	2	sp|O43776|SYNC_HUMAN	SYNC	O43776
sp|Q92905|CSN5_HUMAN	12.3238	13.3488	12.0462	13.7753	15199	2	sp|Q92905|CSN5_HUMAN	CSN5	Q92905
sp|O43688|PLPP2_HUMAN	12.3225	13.0842	12.5505	13.4002	33826	2	sp|O43688|PLPP2_HUMAN	PLPP2	O43688
sp|O00410|IPO5_HUMAN	12.3203	13.4298	13.9374	13.277	62339	5	sp|O00410|IPO5_HUMAN	IPO5	O00410
sp|P20700|LMNB1_HUMAN	12.3118	12.4095	12.399	12.4723	105270	2	sp|P20700|LMNB1_HUMAN	LMNB1	P20700
sp|Q71UI9|H2AV_HUMAN;sp|P0C0S5|H2AZ_HUMAN	12.3025	13.4631	11.9073	13.2005	118050	3	sp|Q71UI9|H2AV_HUMAN;sp|P0C0S5|H2AZ_HUMAN	H2AV	Q71UI9
sp|P21580|TNAP3_HUMAN	12.3018	12.8488	12.8515	12.2748	43803	2	sp|P21580|TNAP3_HUMAN	TNAP3	P21580
sp|Q96FV3|TSN17_HUMAN	12.2967	13.0427	15.8204	16.0168	298210	5	sp|Q96FV3|TSN17_HUMAN	TSN17	Q96FV3
sp|Q15904|VAS1_HUMAN	12.2942	11.8056	12.7934	13.5988	39568	2	sp|Q15904|VAS1_HUMAN	VAS1	Q15904
sp|P55010|IF5_HUMAN	12.2876	12.1128	13.5177	13.5898	48873	3	sp|P55010|IF5_HUMAN	IF5	P55010
sp|Q96Q45|TM237_HUMAN	12.2865	12.8823	13.685	12.3208	35946	2	sp|Q96Q45|TM237_HUMAN	TM237	Q96Q45
sp|P07942|LAMB1_HUMAN	12.2865	12.9965	13.105	12.7701	81541	6	sp|P07942|LAMB1_HUMAN	LAMB1	P07942
sp|Q12933|TRAF2_HUMAN	12.285	12.935	13.2242	12.6724	282310	4	sp|Q12933|TRAF2_HUMAN	TRAF2	Q12933
sp|P67775|PP2AA_HUMAN;sp|P62714|PP2AB_HUMAN	12.2813	14.2165	15.7047	15.997	340040	9	sp|P67775|PP2AA_HUMAN;sp|P62714|PP2AB_HUMAN	PP2AA	P67775
sp|P61457|PHS_HUMAN	12.2791	13.0822	12.5908	12.1163	94362	5	sp|P61457|PHS_HUMAN	PHS	P61457
sp|Q9UKE5|TNIK_HUMAN	12.2739	12.8784	12.5279	13.411	40186	1	sp|Q9UKE5|TNIK_HUMAN	TNIK	Q9UKE5
sp|Q8IWT6|LRC8A_HUMAN	12.272	13.4126	14.2899	14.1433	195690	10	sp|Q8IWT6|LRC8A_HUMAN	LRC8A	Q8IWT6
sp|P14174|MIF_HUMAN	12.2686	12.8887	11.9546	12.0171	1288600	9	sp|P14174|MIF_HUMAN	MIF	P14174
sp|Q86YQ8|CPNE8_HUMAN;sp|Q9HCH3|CPNE5_HUMAN	12.2661	13.7807	12.9002	12.8769	102830	5	sp|Q86YQ8|CPNE8_HUMAN;sp|Q9HCH3|CPNE5_HUMAN	CPNE8	Q86YQ8
sp|Q14764|MVP_HUMAN	12.2638	13.096	14.8088	14.8155	546530	24	sp|Q14764|MVP_HUMAN	MVP	Q14764
sp|P26885|FKBP2_HUMAN	12.2637	12.221	12.4605	12.9484	84533	3	sp|P26885|FKBP2_HUMAN	FKBP2	P26885
sp|Q12860|CNTN1_HUMAN	12.2601	12.3176	16.5236	16.8165	2316600	52	sp|Q12860|CNTN1_HUMAN	CNTN1	Q12860
sp|P54852|EMP3_HUMAN	12.2515	13.8421	13.0812	13.5846	558860	3	sp|P54852|EMP3_HUMAN	EMP3	P54852
sp|Q96BD0|SO4A1_HUMAN	12.2505	13.3962	14.2753	14.5121	95473	5	sp|Q96BD0|SO4A1_HUMAN	SO4A1	Q96BD0
sp|P53004|BIEA_HUMAN	12.2499	13.0138	12.954	13.6422	64926	3	sp|P53004|BIEA_HUMAN	BIEA	P53004
sp|P63220|RS21_HUMAN	12.2496	13.6263	14.0307	12.2574	47569	3	sp|P63220|RS21_HUMAN	RS21	P63220
sp|Q15404|RSU1_HUMAN	12.2476	13.2072	14.8084	14.7586	190080	7	sp|Q15404|RSU1_HUMAN	RSU1	Q15404
sp|Q9UHN6|CEIP2_HUMAN	12.2415	12.0634	13.3575	13.1594	4005.1	1	sp|Q9UHN6|CEIP2_HUMAN	CEIP2	Q9UHN6
sp|Q8NEM2|SHCBP_HUMAN	12.2414	13.1337	12.6823	12.5861	48921	3	sp|Q8NEM2|SHCBP_HUMAN	SHCBP	Q8NEM2
sp|O43813|LANC1_HUMAN	12.2391	11.9295	12.5994	13.6032	278510	4	sp|O43813|LANC1_HUMAN	LANC1	O43813
sp|Q6ZUX7|LHPL2_HUMAN	12.2354	12.1603	16.6586	16.2905	360950	4	sp|Q6ZUX7|LHPL2_HUMAN	LHPL2	Q6ZUX7
sp|P55060|XPO2_HUMAN	12.2303	13.2231	12.9529	13.8328	29431	4	sp|P55060|XPO2_HUMAN	XPO2	P55060
sp|Q8IZ07|AN13A_HUMAN	12.2266	12.4099	13.0066	12.7889	15336	1	sp|Q8IZ07|AN13A_HUMAN	AN13A	Q8IZ07
sp|Q14642|I5P1_HUMAN	12.2226	13.8882	13.1936	12.6669	39833	3	sp|Q14642|I5P1_HUMAN	I5P1	Q14642
sp|P30046|DOPD_HUMAN	12.2208	13.2748	12.7813	13.0535	77632	2	sp|P30046|DOPD_HUMAN	DOPD	P30046
sp|P46109|CRKL_HUMAN	12.2161	13.6721	14.1411	14.628	166840	7	sp|P46109|CRKL_HUMAN	CRKL	P46109
sp|Q14802|FXYD3_HUMAN	12.2152	12.4881	13.7497	12.5781	1454700	5	sp|Q14802|FXYD3_HUMAN	FXYD3	Q14802
sp|Q8NBJ4|GOLM1_HUMAN	12.2026	13.8384	13.1369	12.281	32366	2	sp|Q8NBJ4|GOLM1_HUMAN	GOLM1	Q8NBJ4
sp|Q8WXE9|STON2_HUMAN	12.2017	12.9286	12.7519	12.8395	6590.1	1	sp|Q8WXE9|STON2_HUMAN	STON2	Q8WXE9
sp|Q96E39|RMXL1_HUMAN;sp|P38159|RBMX_HUMAN	12.1994	13.069	13.2416	13.0504	15051	2	sp|Q96E39|RMXL1_HUMAN;sp|P38159|RBMX_HUMAN	RMXL1	Q96E39
sp|Q12979|ABR_HUMAN;sp|P11274|BCR_HUMAN	12.1938	13.2288	13.516	13.2348	8452.2	1	sp|Q12979|ABR_HUMAN;sp|P11274|BCR_HUMAN	ABR	Q12979
sp|Q08554|DSC1_HUMAN	12.1929	13.9557	13.4345	13.4661	101180	8	sp|Q08554|DSC1_HUMAN	DSC1	Q08554
sp|Q15056|IF4H_HUMAN	12.1906	13.4728	12.7809	13.8436	233880	4	sp|Q15056|IF4H_HUMAN	IF4H	Q15056
sp|O43520|AT8B1_HUMAN	12.1811	13.2176	12.958	12.863	7790.2	1	sp|O43520|AT8B1_HUMAN	AT8B1	O43520
sp|Q92692|NECT2_HUMAN	12.1804	13.0225	14.9603	14.7158	169510	5	sp|Q92692|NECT2_HUMAN	NECT2	Q92692
sp|P48067|SC6A9_HUMAN	12.1781	13.1975	15.3116	15.349	274930	6	sp|P48067|SC6A9_HUMAN	SC6A9	P48067
sp|Q15043|S39AE_HUMAN	12.1754	12.7283	17.8819	18.0554	1478600	8	sp|Q15043|S39AE_HUMAN	S39AE	Q15043
sp|Q9HCU4|CELR2_HUMAN	12.1651	12.1198	12.8459	13.3625	147060	5	sp|Q9HCU4|CELR2_HUMAN	CELR2	Q9HCU4
sp|Q99426|TBCB_HUMAN	12.1581	12.8475	13.3853	12.8063	6951	1	sp|Q99426|TBCB_HUMAN	TBCB	Q99426
sp|Q99755|PI51A_HUMAN	12.1572	13.1144	12.2676	12.7675	61119	2	sp|Q99755|PI51A_HUMAN	PI51A	Q99755
sp|P07947|YES_HUMAN	12.1422	15.0862	15.8637	15.7248	640340	17	sp|P07947|YES_HUMAN;sp|P06241|FYN_HUMAN;sp|P06239|LCK_HUMAN	YES	P07947
sp|O43760|SNG2_HUMAN	12.1238	13.282	13.0749	13.2383	129820	3	sp|O43760|SNG2_HUMAN	SNG2	O43760
sp|Q15631|TSN_HUMAN	12.1108	13.5365	12.0788	11.9845	24760	2	sp|Q15631|TSN_HUMAN	TSN	Q15631
sp|Q9H1C7|CYTM1_HUMAN	12.1103	14.1337	11.6958	13.0689	895520	5	sp|Q9H1C7|CYTM1_HUMAN	CYTM1	Q9H1C7
sp|Q9NQ87|HEYL_HUMAN	12.0989	13.3594	11.6272	13.2119	1798400	2	sp|Q9NQ87|HEYL_HUMAN	HEYL	Q9NQ87
sp|P12004|PCNA_HUMAN	12.0871	12.7464	15.0306	15.3664	193380	6	sp|P12004|PCNA_HUMAN	PCNA	P12004
sp|P36871|PGM1_HUMAN	12.0763	13.2668	13.9902	13.2127	8589.9	1	sp|P36871|PGM1_HUMAN	PGM1	P36871
sp|Q9NQ84|GPC5C_HUMAN	12.0699	13.8889	12.458	12.618	88950	3	sp|Q9NQ84|GPC5C_HUMAN	GPC5C	Q9NQ84
sp|Q9HCN3|PGAP6_HUMAN	12.0649	13.9903	12.7535	12.388	21972	2	sp|Q9HCN3|PGAP6_HUMAN	PGAP6	Q9HCN3
sp|Q969E2|SCAM4_HUMAN	12.0541	13.0631	11.8168	12.6074	114040	4	sp|Q969E2|SCAM4_HUMAN	SCAM4	Q969E2
sp|Q5JPF3|AN36C_HUMAN	12.0515	12.2485	12.7931	12.3851	654630	4	sp|Q5JPF3|AN36C_HUMAN;REV__sp|Q14980|NUMA1_HUMAN	AN36C	Q5JPF3
sp|O60925|PFD1_HUMAN	12.0379	12.6041	14.5954	14.9039	115270	6	sp|O60925|PFD1_HUMAN	PFD1	O60925
sp|Q9P1F3|ABRAL_HUMAN	12.0345	12.986	14.0858	12.3454	120800	5	sp|Q9P1F3|ABRAL_HUMAN	ABRAL	Q9P1F3
sp|Q96N16|JKIP1_HUMAN	12.0252	14.2572	12.2058	12.2387	4009700	1	sp|Q96N16|JKIP1_HUMAN	JKIP1	Q96N16
sp|P35268|RL22_HUMAN	12.0126	12.2912	12.3148	13.0689	133380	5	sp|P35268|RL22_HUMAN	RL22	P35268
sp|Q8N8Y2|VA0D2_HUMAN	12.0036	13.5977	11.8596	12.7625	166910	4	sp|Q8N8Y2|VA0D2_HUMAN	VA0D2	Q8N8Y2
sp|Q14156|EFR3A_HUMAN	11.9971	13.9052	14.3371	14.6283	163000	6	sp|Q14156|EFR3A_HUMAN	EFR3A	Q14156
sp|Q13277|STX3_HUMAN	11.9899	13.5533	12.8316	13.083	20584	1	sp|Q13277|STX3_HUMAN	STX3	Q13277
sp|Q9Y287|ITM2B_HUMAN	11.9874	14.0347	13.0793	13.22	532880	6	sp|Q9Y287|ITM2B_HUMAN	ITM2B	Q9Y287
sp|Q9NYT0|PLEK2_HUMAN	11.9765	12.6031	14.0069	14.3762	125130	8	sp|Q9NYT0|PLEK2_HUMAN	PLEK2	Q9NYT0
sp|Q9Y316|MEMO1_HUMAN	11.9703	13.6094	12.0703	13.2168	39527	4	sp|Q9Y316|MEMO1_HUMAN	MEMO1	Q9Y316
sp|P36406|TRI23_HUMAN	11.961	13.1391	13.6345	12.9478	575820	4	sp|P36406|TRI23_HUMAN	TRI23	P36406
sp|P55085|PAR2_HUMAN	11.9583	13.9037	12.3729	12.7696	61286	4	sp|P55085|PAR2_HUMAN	PAR2	P55085
sp|P41252|SYIC_HUMAN	11.9563	13.5144	13.0168	12.5232	38250	3	sp|P41252|SYIC_HUMAN	SYIC	P41252
sp|Q15819|UB2V2_HUMAN	11.9464	12.599	12.0886	12.9271	4457	1	sp|Q15819|UB2V2_HUMAN	UB2V2	Q15819
sp|P07814|SYEP_HUMAN	11.9083	12.7222	12.3231	13.2173	17830	2	sp|P07814|SYEP_HUMAN	SYEP	P07814
sp|P26373|RL13_HUMAN	11.9052	12.2776	12.3008	11.8818	40250	3	sp|P26373|RL13_HUMAN	RL13	P26373
sp|Q16778|H2B2E_HUMAN;sp|P33778|H2B1B_HUMAN;sp|P23527|H2B1O_HUMAN;sp|P06899|H2B1J_HUMAN;sp|Q8N257|H2B3B_HUMAN	11.8963	13.018	12.4807	11.7653	765400	4	sp|Q16778|H2B2E_HUMAN;sp|P33778|H2B1B_HUMAN;sp|P23527|H2B1O_HUMAN;sp|P06899|H2B1J_HUMAN;sp|Q8N257|H2B3B_HUMAN;sp|Q6DRA6|H2B2D_HUMAN;sp|Q6DN03|H2B2C_HUMAN	H2B2E	Q16778
sp|Q15435|PP1R7_HUMAN	11.8934	12.6239	13.5131	14.0546	11604	2	sp|Q15435|PP1R7_HUMAN	PP1R7	Q15435
sp|Q08357|S20A2_HUMAN	11.8475	13.2365	15.4983	15.7242	341940	8	sp|Q08357|S20A2_HUMAN	S20A2	Q08357
sp|P18085|ARF4_HUMAN	11.8096	11.5084	15.4393	15.6106	326310	9	sp|P18085|ARF4_HUMAN	ARF4	P18085
sp|P49321|NASP_HUMAN	11.8027	12.9706	12.6175	13.7047	8269.4	2	sp|P49321|NASP_HUMAN	NASP	P49321
sp|Q8NBN3|TM87A_HUMAN	11.7667	13.4584	14.0377	14.0563	107530	6	sp|Q8NBN3|TM87A_HUMAN	TM87A	Q8NBN3
sp|Q9H9B4|SFXN1_HUMAN	11.7496	13.3878	14.1437	12.9783	22347	2	sp|Q9H9B4|SFXN1_HUMAN	SFXN1	Q9H9B4
sp|P58546|MTPN_HUMAN	11.6965	13.334	12.7612	12.3065	235600	5	sp|P58546|MTPN_HUMAN	MTPN	P58546
sp|Q9Y6N7|ROBO1_HUMAN	11.6855	12.5885	11.6905	13.0451	42535	2	sp|Q9Y6N7|ROBO1_HUMAN	ROBO1	Q9Y6N7
sp|P47929|LEG7_HUMAN	11.684	13.4879	13.0402	13.5222	111350	8	sp|P47929|LEG7_HUMAN	LEG7	P47929
sp|P12532|KCRU_HUMAN	11.6786	13.1286	13.617	12.7102	209990	7	sp|P12532|KCRU_HUMAN	KCRU	P12532
sp|Q9UJZ1|STML2_HUMAN	11.6599	13.4277	12.3966	12.5523	4964.5	1	sp|Q9UJZ1|STML2_HUMAN	STML2	Q9UJZ1
sp|Q86Y82|STX12_HUMAN	11.6312	14.7239	14.715	13.2347	161340	7	sp|Q86Y82|STX12_HUMAN	STX12	Q86Y82
sp|Q8WZA0|LZIC_HUMAN	11.6164	12.8499	12.6074	12.9962	27805	2	sp|Q8WZA0|LZIC_HUMAN	LZIC	Q8WZA0
sp|P01834|IGKC_HUMAN;sp|P0DOX7|IGK_HUMAN	11.6009	12.8516	14.852	14.7101	193070	7	sp|P01834|IGKC_HUMAN;sp|P0DOX7|IGK_HUMAN	IGKC	P01834
sp|Q15149|PLEC_HUMAN	11.5035	11.6146	15.9718	16.2593	3328300	136	sp|Q15149|PLEC_HUMAN;sp|P58107|EPIPL_HUMAN	PLEC	Q15149
sp|P15144|AMPN_HUMAN	10.9745	10.8896	20.5183	20.4384	49289000	96	sp|P15144|AMPN_HUMAN	AMPN	P15144
sp|Q15582|BGH3_HUMAN	10.7774	12.8213	13.8577	13.8096	110350	7	sp|Q15582|BGH3_HUMAN	BGH3	Q15582
