# Supplementary material for: Cell-surface tethered promiscuous biotinylators enable comparative small-scale surface proteomic analysis of human extracellular vesicles and cells
Source: eLife journal article supplement (doi:10.7554/elife.73982), 2022-03-04
Supplement: supp [file elife-73982-supp-v1.zip › elife_poa_e73982_Figure_4_source_data_3.xlsx]

## Sheet: Appendix
Sample Origin	Sample Names	Sheet Titles	Description
Extracellular vesicle preparation + WGA-HRP	Control_EV_1-1	Raw Values	Area values produced from PEAKS Online X version 1.5
	Control_EV_1-2	Total Area Normalization	Area values divided by the summed total area intensity
	Control_EV_2-1	Imputed Matrix	Normalized values were log2(x) transformed and imputed using standard settings in Perseus
	Control_EV_2-2	Significance < 0.05	Imputed matrix was triaged for proteins with significant differences between Control and Myc EVs. Significance was based on p-values < 0.05 determined by standard unpaired Student t-test with unequal variances.
	Myc_EV_1-1	Z-score	In order to plot heatmap figures, Z-scores were determined for each sample using the following equation: (LFQ area - Mean LFQ Area)/Standard Deviation.
	Myc_EV_1-2
	Myc_EV_2-1
	Myc_EV_2-2

## Sheet: Raw Values
Protein Group	Top	Accession	Significance	Coverage (%)	#Peptides	#Unique	PTM	Myc_EV_2-2 Area	Myc_EV_2-1 Area	Myc_EV_1-2 Area	Myc_EV_1-1 Area	Control_EV_2-2 Area	Control_EV_2-1 Area	Control_EV_1-2 Area	Control_EV_1-1 Area	Sample Profile (Ratio)	Myc EV Area	Control EV Area	Group Profile (Ratio)	Avg. Mass	Description	Uniprot
473	TRUE	P78536|ADA17_HUMAN	8.14	6.07	4	4	Oxidation (M)	1140.68	1067.2	1921.71	1434.15	956.135	690.66	1464.42	913.651	0.95:0.89:1.60:1.20:0.80:0.58:1.22:0.76	1390.93	1006.22	1.16:0.84	93021	Disintegrin and metalloproteinase domain-containing protein 17 OS=Homo sapiens OX=9606 GN=ADAM17 PE=1 SV=1	P78536
840	TRUE	P11279|LAMP1_HUMAN	24.5	6	2	2		114.768	544.964	734.74	295.754	1938.85	2550.49	2489.17	2419.82	0.08:0.39:0.53:0.21:1.40:1.84:1.80:1.75	455.381	2448.81	0.31:1.69	44882	Lysosome-associated membrane glycoprotein 1 OS=Homo sapiens OX=9606 GN=LAMP1 PE=1 SV=3	P11279
679	TRUE	Q13444|ADA15_HUMAN	8.68	1.74	1	1		439.686	437.785	481.489	660.398	401.099	442.439	381.501	442.049	0.95:0.95:1.04:1.43:0.87:0.96:0.83:0.96	504.839	416.772	1.10:0.90	92959	Disintegrin and metalloproteinase domain-containing protein 15 OS=Homo sapiens OX=9606 GN=ADAM15 PE=1 SV=4	Q13444
113	TRUE	Q9P273|TEN3_HUMAN	15.6	0.44	1	1		136.95	165.945	167.998	180.647	70.429	157.627	64.9108	84.9981	1.06:1.29:1.31:1.40:0.55:1.22:0.50:0.66	162.885	94.4913	1.27:0.73	300950	Teneurin-3 OS=Homo sapiens OX=9606 GN=TENM3 PE=1 SV=3	Q9P273
369	TRUE	Q8WUX1|S38A5_HUMAN	57.15	12.08	5	5	Acetylation (N-term); Oxidation (M)	7379.44	7413.63	13554.3	16365.5	249.43	214.205	241.376	263.375	1.29:1.30:2.37:2.87:0.04:0.04:0.04:0.05	11178.2	242.096	1.96:0.04	51457	Sodium-coupled neutral amino acid transporter 5 OS=Homo sapiens OX=9606 GN=SLC38A5 PE=1 SV=1	Q8WUX1
710	TRUE	Q9H2J7|S6A15_HUMAN	11.82	5.75	3	3		304.981	340.812	528.687	538.705	251.382	374.864	217.888	122.47	0.91:1.02:1.58:1.61:0.75:1.12:0.65:0.37	428.296	256.513	1.25:0.75	81836	Sodium-dependent neutral amino acid transporter B(0)AT2 OS=Homo sapiens OX=9606 GN=SLC6A15 PE=1 SV=1	Q9H2J7
1205	TRUE	Q15043|S39AE_HUMAN	17.25	2.64	1	1		1530.73	1006.73	2572.04	2425.88	680.48	1167.84	670.354	646.777	1.14:0.75:1.92:1.81:0.51:0.87:0.50:0.48	1883.84	791.362	1.41:0.59	54212	Metal cation symporter ZIP14 OS=Homo sapiens OX=9606 GN=SLC39A14 PE=1 SV=3	Q15043
148	TRUE	P16070|CD44_HUMAN	22.65	8.09	6	6	Oxidation (M)	38818.5	40070.4	83215.4	91543.1	18385.2	20556.3	6364.27	6950.68	1.02:1.05:2.18:2.39:0.48:0.54:0.17:0.18	63411.9	13064.1	1.66:0.34	81538	CD44 antigen OS=Homo sapiens OX=9606 GN=CD44 PE=1 SV=3	P16070
1073	TRUE	Q9Y5Y0|FLVC1_HUMAN	9.03	4.68	2	2		200.646	211.458	307.162	276.321	149.558	182.23	234.419	60.0571	0.99:1.04:1.52:1.36:0.74:0.90:1.16:0.30	287.162	214.725	1.14:0.86	59863	Feline leukemia virus subgroup C receptor-related protein 1 OS=Homo sapiens OX=9606 GN=FLVCR1 PE=1 SV=1	Q9Y5Y0
1313	TRUE	Q14210|LY6D_HUMAN	24.98	10.94	1	1		0	0	92.4874	91.0299	235.572	251.881	364.572	223	0.00:0.00:0.59:0.58:1.50:1.60:2.32:1.42	91.7587	268.756	0.51:1.49	13286	Lymphocyte antigen 6D OS=Homo sapiens OX=9606 GN=LY6D PE=1 SV=1	Q14210
222	TRUE	Q14118|DAG1_HUMAN	7.42	1.23	1	1		121.443	152.518	291.63	235.687	64.287	101.748	180.936	163.922	0.74:0.93:1.78:1.44:0.39:0.62:1.10:1.00	200.319	127.723	1.22:0.78	97441	Dystroglycan OS=Homo sapiens OX=9606 GN=DAG1 PE=1 SV=2	Q14118
45	TRUE	P15144|AMPN_HUMAN	52.82	28.02	23	23	Oxidation (M)	10484.5	11528.6	25887	25485	365.533	424.927	400.353	354.256	1.12:1.23:2.76:2.72:0.04:0.05:0.04:0.04	18346.3	430.337	1.95:0.05	109540	Aminopeptidase N OS=Homo sapiens OX=9606 GN=ANPEP PE=1 SV=4	P15144
229	TRUE	Q9Y624|JAM1_HUMAN	2.76	28.43	9	9	Oxidation (M)	29747.1	28840.6	35187.1	32501.1	11502.3	36022.8	36147.6	31117.4	0.99:0.96:1.17:1.08:0.38:1.20:1.20:1.03	31568.9	28697.5	1.05:0.95	32583	Junctional adhesion molecule A OS=Homo sapiens OX=9606 GN=F11R PE=1 SV=1	Q9Y624
347	TRUE	O15439|MRP4_HUMAN	11.95	3.7	4	4		419.045	426.275	875.208	1033.33	488.154	340.169	326.247	220.183	0.81:0.83:1.70:2.00:0.95:0.66:0.63:0.43	688.463	374.568	1.30:0.70	149527	Multidrug resistance-associated protein 4 OS=Homo sapiens OX=9606 GN=ABCC4 PE=1 SV=3	O15439
572	TRUE	P16422|EPCAM_HUMAN	3.46	19.43	4	4	Oxidation (M)	2601.55	3826.9	5161.86	5061.89	3650.24	4318.21	3302.85	2738.45	0.68:1.00:1.35:1.32:0.95:1.13:0.86:0.71	4163.05	3502.44	1.09:0.91	34932	Epithelial cell adhesion molecule OS=Homo sapiens OX=9606 GN=EPCAM PE=1 SV=2	P16422
104	TRUE	P33527|MRP1_HUMAN	4.78	23.19	24	24	Oxidation (M)	7959.22	10326.4	15982.2	12116.4	10463.5	10900.8	5711.03	10041.7	0.76:0.99:1.53:1.16:1.00:1.04:0.55:0.96	11596	9279.25	1.11:0.89	171591	Multidrug resistance-associated protein 1 OS=Homo sapiens OX=9606 GN=ABCC1 PE=1 SV=3	P33527
564	TRUE	Q9H6X2|ANTR1_HUMAN	3.24	1.77	1	1		56.418	51.1236	104.43	98.0847	55.4073	63.1223	0	0	1.05:0.95:1.95:1.83:1.03:1.18:0.00:0.00	77.5141	59.2648	1.13:0.87	62789	Anthrax toxin receptor 1 OS=Homo sapiens OX=9606 GN=ANTXR1 PE=1 SV=2	Q9H6X2
355	TRUE	Q96PD2|DCBD2_HUMAN	8.92	1.55	1	1		202.182	191.907	388.896	195.983	212.006	193.982	101.431	50.3397	1.05:1.00:2.02:1.02:1.10:1.01:0.53:0.26	244.742	139.44	1.27:0.73	85035	Discoidin, CUB and LCCL domain-containing protein 2 OS=Homo sapiens OX=9606 GN=DCBLD2 PE=1 SV=1	Q96PD2
252	TRUE	P55290|CAD13_HUMAN	29.32	5.19	3	3		407.804	398.349	1087.87	487.149	57.5279	69.0202	140.969	108.944	1.18:1.16:3.16:1.41:0.17:0.20:0.41:0.32	595.292	124.173	1.65:0.35	78287	Cadherin-13 OS=Homo sapiens OX=9606 GN=CDH13 PE=1 SV=1	P55290
587	TRUE	Q14108|SCRB2_HUMAN	53.66	23.43	7	7	Oxidation (M)	739.084	1082.25	894.517	1044	6120.34	7986.57	5387.14	5832.78	0.20:0.30:0.25:0.29:1.68:2.20:1.48:1.60	939.961	6331.71	0.26:1.74	54290	Lysosome membrane protein 2 OS=Homo sapiens OX=9606 GN=SCARB2 PE=1 SV=2	Q14108
1562	TRUE	Q86VH4|LRRT4_HUMAN	9.38	1.86	1	1		504.106	320.784	453.804	460.145	358.467	442.847	138.942	110.905	1.45:0.92:1.30:1.32:1.03:1.27:0.40:0.32	434.71	262.79	1.25:0.75	67217	Leucine-rich repeat transmembrane neuronal protein 4 OS=Homo sapiens OX=9606 GN=LRRTM4 PE=2 SV=2	Q86VH4
393	TRUE	P48960|AGRE5_HUMAN	9.68	8.74	4	4	Oxidation (M)	1250.28	1310.8	3480.9	2678.66	1163.7	1519.17	1075.65	1035.9	0.74:0.78:2.06:1.59:0.69:0.90:0.64:0.61	2180.16	1198.61	1.29:0.71	91869	Adhesion G protein-coupled receptor E5 OS=Homo sapiens OX=9606 GN=ADGRE5 PE=1 SV=4	P48960
168	TRUE	P21589|5NTD_HUMAN	14.28	23	10	10	Oxidation (M)	1940.7	2707.59	6695.12	6385.65	2013.35	1954.38	1304.27	874.4	0.65:0.91:2.24:2.14:0.67:0.65:0.44:0.29	4432.26	1568.09	1.48:0.52	63368	5'-nucleotidase OS=Homo sapiens OX=9606 GN=NT5E PE=1 SV=1	P21589
143	TRUE	P13637|AT1A3_HUMAN	4.84	2.27	14	1	Carbamidomethylation	223.024	287.062	189.76	295.417	138.464	227.319	200.657	268.491	0.97:1.25:0.83:1.29:0.61:0.99:0.88:1.17	248.816	208.733	1.09:0.91	111749	Sodium/potassium-transporting ATPase subunit alpha-3 OS=Homo sapiens OX=9606 GN=ATP1A3 PE=1 SV=3	P13637
49	TRUE	P17301|ITA2_HUMAN	5.88	28.62	24	24	Acetylation (N-term); Carbamidomethylation; Oxidation (M)	28404.5	35609.9	53192	45345.4	41633	29496	33530.8	7043.05	0.83:1.04:1.55:1.32:1.21:0.86:0.98:0.21	40637.9	27925.7	1.19:0.81	129295	Integrin alpha-2 OS=Homo sapiens OX=9606 GN=ITGA2 PE=1 SV=1	P17301
648	TRUE	O43570|CAH12_HUMAN	19.11	19.21	5	5	Oxidation (M)	1112.64	3728.7	3953.99	3576.88	893.258	926.314	944.159	998.968	0.55:1.85:1.96:1.77:0.44:0.46:0.47:0.50	3093.05	940.675	1.53:0.47	39451	Carbonic anhydrase 12 OS=Homo sapiens OX=9606 GN=CA12 PE=1 SV=1	O43570
752	TRUE	P15151|PVR_HUMAN	7.29	10.31	3	3	Oxidation (M)	2702.59	2393.78	5687.6	5393.9	2922.88	4510.73	1267.15	721.54	0.84:0.75:1.78:1.69:0.91:1.41:0.40:0.23	4044.47	2355.57	1.26:0.74	45303	Poliovirus receptor OS=Homo sapiens OX=9606 GN=PVR PE=1 SV=2	P15151
758	TRUE	Q96RD7|PANX1_HUMAN	6.57	9.15	3	3		891.94	1010.33	2537.2	2447.04	1109.99	1452.35	872.536	673.639	0.65:0.74:1.85:1.78:0.81:1.06:0.63:0.49	1721.63	1027.13	1.25:0.75	48050	Pannexin-1 OS=Homo sapiens OX=9606 GN=PANX1 PE=1 SV=4	Q96RD7
1146	TRUE	O94985|CSTN1_HUMAN	2.24	3.36	2	2		221.355	253.868	313.769	279.263	298.386	238.72	141.119	315.211	0.86:0.99:1.22:1.08:1.16:0.93:0.55:1.22	267.064	248.359	1.04:0.96	109793	Calsyntenin-1 OS=Homo sapiens OX=9606 GN=CLSTN1 PE=1 SV=1	O94985
727	TRUE	Q9Y6M5|ZNT1_HUMAN	7.4	12.82	4	4		2873.56	3286.09	8769.73	8937.26	3695.35	4725.87	1680.11	2529.01	0.63:0.72:1.92:1.96:0.81:1.04:0.37:0.55	5966.66	3157.58	1.31:0.69	55300	Zinc transporter 1 OS=Homo sapiens OX=9606 GN=SLC30A1 PE=1 SV=3	Q9Y6M5
1444	TRUE	P43003|EAA1_HUMAN	1.99	2.21	1	1		51.7619	82.3628	233.382	159.443	86.4499	86.5407	0	0	0.59:0.94:2.67:1.82:0.99:0.99:0.00:0.00	131.738	86.4953	1.21:0.79	59572	Excitatory amino acid transporter 1 OS=Homo sapiens OX=9606 GN=SLC1A3 PE=1 SV=1	P43003
723	TRUE	Q08357|S20A2_HUMAN	0.84	1.53	1	1		78.0896	94.6819	167.784	202.302	96.1428	158.736	142.246	90.1368	0.61:0.74:1.30:1.57:0.75:1.23:1.10:0.70	135.714	121.815	1.05:0.95	70392	Sodium-dependent phosphate transporter 2 OS=Homo sapiens OX=9606 GN=SLC20A2 PE=1 SV=1	Q08357
130	TRUE	Q12860|CNTN1_HUMAN	8.78	20.43	15	15	Oxidation (M)	926.546	1809.35	3605.55	4703.97	1028.6	1599.12	1266.19	946.534	0.47:0.91:1.82:2.37:0.52:0.81:0.64:0.48	2761.36	1210.11	1.39:0.61	113320	Contactin-1 OS=Homo sapiens OX=9606 GN=CNTN1 PE=1 SV=1	Q12860
1068	TRUE	Q9BXS9|S26A6_HUMAN	7.63	4.35	2	2	Oxidation (M)	80.5894	187.797	517.72	542.274	92.4016	162.314	0	70.8866	0.39:0.91:2.50:2.62:0.45:0.79:0.00:0.34	394.449	162.697	1.42:0.58	82967	Solute carrier family 26 member 6 OS=Homo sapiens OX=9606 GN=SLC26A6 PE=1 SV=1	Q9BXS9
301	TRUE	P42892|ECE1_HUMAN	1.73	6.49	3	3	Oxidation (M)	422.721	441.321	754.573	767.798	664.264	717.859	509.269	612.732	0.69:0.72:1.23:1.26:1.09:1.17:0.83:1.00	596.603	626.031	0.98:1.02	87164	Endothelin-converting enzyme 1 OS=Homo sapiens OX=9606 GN=ECE1 PE=1 SV=2	P42892
1466	TRUE	Q9HBW0|LPAR2_HUMAN	1.8	2.56	1	1		103.27	131.684	159.27	203.366	179.928	160.439	107.375	96.6306	0.72:0.92:1.12:1.42:1.26:1.12:0.75:0.68	149.398	136.093	1.05:0.95	39084	Lysophosphatidic acid receptor 2 OS=Homo sapiens OX=9606 GN=LPAR2 PE=1 SV=2	Q9HBW0
182	TRUE	Q04912|RON_HUMAN	7.59	1.71	2	2		61.5856	166.229	393.593	211.922	67.9421	171.168	63.9662	71.4898	0.41:1.10:2.61:1.40:0.45:1.13:0.42:0.47	229.455	139.609	1.24:0.76	152241	Macrophage-stimulating protein receptor OS=Homo sapiens OX=9606 GN=MST1R PE=1 SV=3	Q04912
91	TRUE	Q13740|CD166_HUMAN	5.4	16.98	8	8	Oxidation (M)	3794.53	3441.2	12212	11480.9	5930.29	5924.39	3184.12	2397.27	0.63:0.57:2.02:1.90:0.98:0.98:0.53:0.40	7835.18	4359.02	1.29:0.71	65102	CD166 antigen OS=Homo sapiens OX=9606 GN=ALCAM PE=1 SV=2	Q13740
579	TRUE	Q9UHX3|AGRE2_HUMAN	8.53	1.82	1	1	Oxidation (M)	110.312	134.06	213.743	412.842	216.883	80.1754	57.0748	80.2144	0.68:0.82:1.31:2.53:1.33:0.49:0.35:0.49	217.739	108.587	1.33:0.67	90472	Adhesion G protein-coupled receptor E2 OS=Homo sapiens OX=9606 GN=ADGRE2 PE=1 SV=2	Q9UHX3
766	TRUE	O00220|TR10A_HUMAN	1.81	5.34	2	2	Oxidation (M)	658.627	254.029	1056.04	893.387	681.641	654.236	494.147	376.659	1.04:0.40:1.67:1.41:1.08:1.03:0.78:0.59	715.52	576.391	1.11:0.89	50089	Tumor necrosis factor receptor superfamily member 10A OS=Homo sapiens OX=9606 GN=TNFRSF10A PE=1 SV=3	O00220
850	TRUE	P18827|SDC1_HUMAN	13.03	3.87	1	1		0	0	87.872	87.5714	384.103	450.826	197.612	147.299	0.00:0.00:0.52:0.52:2.27:2.66:1.17:0.87	87.7217	294.96	0.46:1.54	32462	Syndecan-1 OS=Homo sapiens OX=9606 GN=SDC1 PE=1 SV=3	P18827
254	TRUE	Q08174|PCDH1_HUMAN	23.09	1.23	1	1	Oxidation (M)	81.9902	0	107.265	91.6562	238.508	293.796	149.074	229.295	0.55:0.00:0.72:0.62:1.60:1.97:1.00:1.54	93.6372	227.668	0.58:1.42	114743	Protocadherin-1 OS=Homo sapiens OX=9606 GN=PCDH1 PE=1 SV=2	Q08174
308	TRUE	O60603|TLR2_HUMAN	1.72	2.93	2	2	Oxidation (M)	298.924	308.011	252.024	534.242	333.336	443.344	377.091	307.039	0.84:0.86:0.71:1.50:0.93:1.24:1.06:0.86	348.3	365.202	0.98:1.02	89838	Toll-like receptor 2 OS=Homo sapiens OX=9606 GN=TLR2 PE=1 SV=1	O60603
1183	TRUE	P07204|TRBM_HUMAN	1.71	3.48	1	1		286.067	280.132	471.224	529.678	439.226	500.698	268.873	213.358	0.77:0.75:1.26:1.42:1.18:1.34:0.72:0.57	391.775	355.539	1.05:0.95	60329	Thrombomodulin OS=Homo sapiens OX=9606 GN=THBD PE=1 SV=2	P07204
797	TRUE	P17813|EGLN_HUMAN	6.42	3.34	2	2		279.857	410.236	405.002	224.344	452.752	280.15	102.279	50.5823	1.02:1.49:1.47:0.81:1.64:1.02:0.37:0.18	329.86	221.441	1.20:0.80	70578	Endoglin OS=Homo sapiens OX=9606 GN=ENG PE=1 SV=2	P17813
1175	TRUE	P32970|CD70_HUMAN	1.4	12.44	2	2		269.423	46.1768	461.998	457.34	121.252	169.706	216.731	254.009	1.08:0.19:1.85:1.83:0.49:0.68:0.87:1.02	308.734	190.424	1.24:0.76	21118	CD70 antigen OS=Homo sapiens OX=9606 GN=CD70 PE=1 SV=2	P32970
736	TRUE	Q99808|S29A1_HUMAN	1.83	10.96	4	4		18744.9	17415.4	4726.39	25323.5	15579	4452.86	17246.3	13148.2	1.29:1.19:0.32:1.74:1.07:0.31:1.18:0.90	16552.5	12606.6	1.14:0.86	50219	Equilibrative nucleoside transporter 1 OS=Homo sapiens OX=9606 GN=SLC29A1 PE=1 SV=3	Q99808
777	TRUE	P25445|TNR6_HUMAN	0.86	8.96	3	3		212.328	198.231	348.009	255.837	95.7818	360.129	404.997	380.816	0.75:0.70:1.23:0.91:0.34:1.28:1.44:1.35	253.601	310.431	0.90:1.10	37732	Tumor necrosis factor receptor superfamily member 6 OS=Homo sapiens OX=9606 GN=FAS PE=1 SV=1	P25445
499	TRUE	Q8N271|PROM2_HUMAN	21.56	7.19	5	5		546.225	972.406	1438.66	1979.98	6195.15	7433.29	3241.24	3094.32	0.18:0.31:0.46:0.64:1.99:2.39:1.04:0.99	1234.32	4991	0.40:1.60	91883	Prominin-2 OS=Homo sapiens OX=9606 GN=PROM2 PE=1 SV=1	Q8N271
410	TRUE	P01889|HLAB_HUMAN	22.7	9.39	7	2		514.256	1673.94	1719.78	1879.11	16869.5	19168.8	5191.36	5194.46	0.08:0.26:0.26:0.29:2.58:2.94:0.80:0.80	1446.77	11606	0.22:1.78	40460	HLA class I histocompatibility antigen, B alpha chain OS=Homo sapiens OX=9606 GN=HLA-B PE=1 SV=3	P01889
939	TRUE	Q10589|BST2_HUMAN	24.2	13.89	2	2		336.581	119.598	324.374	328.396	4871.12	5987.94	1070.83	1382.04	0.19:0.07:0.18:0.18:2.70:3.32:0.59:0.77	318.763	3327.98	0.17:1.83	19769	Bone marrow stromal antigen 2 OS=Homo sapiens OX=9606 GN=BST2 PE=1 SV=1	Q10589
304	TRUE	Q8WTV0|SCRB1_HUMAN	3.3	11.05	6	6	Oxidation (M)	6905.56	6450.57	12332.4	13224.4	11967.7	11948.5	3462.81	4623.74	0.78:0.73:1.39:1.49:1.35:1.35:0.39:0.52	9728.22	8000.68	1.10:0.90	60878	Scavenger receptor class B member 1 OS=Homo sapiens OX=9606 GN=SCARB1 PE=1 SV=1	Q8WTV0
714	TRUE	P50443|S26A2_HUMAN	4.04	2.71	1	1		90.7641	84.7124	130.774	125.143	115.933	165.012	114.624	100.581	0.78:0.73:1.13:1.08:1.00:1.42:0.99:0.87	107.848	124.038	0.93:1.07	81662	Sulfate transporter OS=Homo sapiens OX=9606 GN=SLC26A2 PE=1 SV=2	P50443
384	TRUE	P11166|GTR1_HUMAN	5.13	10.57	7	7	Oxidation (M)	3625.44	3348.57	17521.7	15906.8	7456.1	8699.74	1725.81	1797.78	0.48:0.45:2.33:2.12:0.99:1.16:0.23:0.24	10100.6	4919.86	1.34:0.66	54084	Solute carrier family 2, facilitated glucose transporter member 1 OS=Homo sapiens OX=9606 GN=SLC2A1 PE=1 SV=2	P11166
68	TRUE	P08581|MET_HUMAN	2.88	1.73	2	2		325.09	328.975	1107.56	672.252	740.32	362.532	183.729	505.122	0.62:0.62:2.10:1.27:1.40:0.69:0.35:0.96	608.469	447.926	1.15:0.85	155541	Hepatocyte growth factor receptor OS=Homo sapiens OX=9606 GN=MET PE=1 SV=4	P08581
357	TRUE	O14786|NRP1_HUMAN	1.73	4.66	3	3		492.814	248.718	1316.17	1428.3	584.551	812.864	267.15	759.246	0.67:0.34:1.78:1.93:0.79:1.10:0.36:1.03	1006.52	780.819	1.13:0.87	103134	Neuropilin-1 OS=Homo sapiens OX=9606 GN=NRP1 PE=1 SV=3	O14786
427	TRUE	P18564|ITB6_HUMAN	3.51	6.6	5	5		3782.47	3873.91	15269.3	15189.5	9045.14	8439.76	3214.48	2595.17	0.49:0.50:1.99:1.98:1.18:1.10:0.42:0.34	9528.81	5823.64	1.24:0.76	85936	Integrin beta-6 OS=Homo sapiens OX=9606 GN=ITGB6 PE=1 SV=2	P18564
298	TRUE	Q15758|AAAT_HUMAN	1.63	18.67	10	10	Acetylation (N-term); Oxidation (M)	18253.1	18601.8	42072.5	43851	36142.1	38411.3	15897.4	15745.2	0.64:0.65:1.47:1.53:1.26:1.34:0.56:0.55	30694.6	26549	1.07:0.93	56598	Neutral amino acid transporter B(0) OS=Homo sapiens OX=9606 GN=SLC1A5 PE=1 SV=2	Q15758
279	TRUE	P18433|PTPRA_HUMAN	2.2	5.36	4	4		441.348	482.194	2127.44	1739.15	848.278	982.939	475.09	750.896	0.45:0.49:2.17:1.77:0.86:1.00:0.48:0.77	1197.53	764.301	1.22:0.78	90719	Receptor-type tyrosine-protein phosphatase alpha OS=Homo sapiens OX=9606 GN=PTPRA PE=1 SV=3	P18433
1215	TRUE	O95832|CLD1_HUMAN	2.07	14.69	2	2	Oxidation (M)	310.107	361.999	1483.76	1421.09	632.17	757.201	446.713	437.57	0.42:0.49:2.03:1.94:0.86:1.04:0.61:0.60	894.238	568.413	1.22:0.78	22744	Claudin-1 OS=Homo sapiens OX=9606 GN=CLDN1 PE=1 SV=1	O95832
426	TRUE	Q13641|TPBG_HUMAN	3.95	10.48	3	3	Oxidation (M)	3125.36	2220.22	7727.79	8502.39	5833.87	6169.38	963.408	1694.96	0.69:0.49:1.71:1.88:1.29:1.36:0.21:0.37	5393.94	3665.4	1.19:0.81	46032	Trophoblast glycoprotein OS=Homo sapiens OX=9606 GN=TPBG PE=1 SV=1	Q13641
103	TRUE	P22223|CADH3_HUMAN	1.98	10.01	7	7		848.968	708.632	2504.84	2633.45	1756.75	1652.65	708.02	834.914	0.58:0.49:1.72:1.81:1.21:1.14:0.49:0.57	1715.11	1276.22	1.15:0.85	91418	Cadherin-3 OS=Homo sapiens OX=9606 GN=CDH3 PE=1 SV=2	P22223
17	TRUE	Q9NZM1|MYOF_HUMAN	1.38	28.14	46	46	Carbamidomethylation; Oxidation (M)	4486.44	4204.65	14692.7	15681	9055.22	9722.75	5515.86	5006.83	0.52:0.49:1.72:1.83:1.06:1.14:0.65:0.59	9766.2	7325.16	1.14:0.86	234709	Myoferlin OS=Homo sapiens OX=9606 GN=MYOF PE=1 SV=1	Q9NZM1
28	TRUE	Q14517|FAT1_HUMAN	5.32	1.94	7	7	Oxidation (M)	714.591	1201.65	665.403	890.967	1311.03	760.192	217.802	330.933	0.94:1.58:0.87:1.17:1.72:1.00:0.29:0.43	868.154	716.721	1.10:0.90	506273	Protocadherin Fat 1 OS=Homo sapiens OX=9606 GN=FAT1 PE=1 SV=2	Q14517
227	TRUE	P50281|MMP14_HUMAN	3.46	14.6	8	8	Oxidation (M)	1971.4	3431.84	5472.13	8230.74	3275.27	7351.82	2251.61	1134.17	0.48:0.83:1.32:1.99:0.79:1.78:0.54:0.27	4776.53	3503.22	1.15:0.85	65894	Matrix metalloproteinase-14 OS=Homo sapiens OX=9606 GN=MMP14 PE=1 SV=3	P50281
467	TRUE	P55011|S12A2_HUMAN	15.87	0.99	1	1		0	0	52.9414	0	184.665	201.218	53.7925	0	0.00:0.00:0.86:0.00:3.00:3.27:0.87:0.00	52.9414	146.558	0.53:1.47	131447	Solute carrier family 12 member 2 OS=Homo sapiens OX=9606 GN=SLC12A2 PE=1 SV=1	P55011
757	TRUE	P09758|TACD2_HUMAN	17.74	13	3	3		989.378	1973.88	3444.09	3227.62	10545.9	10692.5	4889.24	4816.17	0.20:0.39:0.68:0.64:2.08:2.11:0.96:0.95	2408.74	7735.96	0.47:1.53	35709	Tumor-associated calcium signal transducer 2 OS=Homo sapiens OX=9606 GN=TACSTD2 PE=1 SV=3	P09758
149	TRUE	Q08554|DSC1_HUMAN	11.7	29.64	25	25	Carbamidomethylation; Oxidation (M)	3593.44	3783.6	3038.74	1457.96	4698.15	4653.32	121175	114153	0.11:0.12:0.09:0.05:0.15:0.15:3.78:3.56	2968.43	61169.9	0.09:1.91	99987	Desmocollin-1 OS=Homo sapiens OX=9606 GN=DSC1 PE=1 SV=2	Q08554
867	TRUE	Q8NG11|TSN14_HUMAN	25.1	17.78	4	4	Carbamidomethylation	4425	4288.93	6072.63	5409.16	20459	23744.1	10567.5	10337.7	0.41:0.40:0.57:0.51:1.92:2.23:0.99:0.97	5048.93	16277.1	0.47:1.53	30691	Tetraspanin-14 OS=Homo sapiens OX=9606 GN=TSPAN14 PE=1 SV=1	Q8NG11
1583	TRUE	Q16563|SYPL1_HUMAN	1.85	4.25	1	1		285.257	105.139	399.406	462.506	427.924	282.716	139.358	145.678	1.02:0.37:1.42:1.65:1.52:1.01:0.50:0.52	313.077	248.919	1.11:0.89	28565	Synaptophysin-like protein 1 OS=Homo sapiens OX=9606 GN=SYPL1 PE=1 SV=1	Q16563
1310	TRUE	A0A0C4DH30|HV316_HUMAN	11.2	16.24	1	1		0	59.305	68.456	66.9202	83.6656	97.643	129.529	273.984	0.00:0.61:0.70:0.69:0.86:1.00:1.33:2.81	64.8938	146.205	0.61:1.39	13070	Probable non-functional immunoglobulin heavy variable 3-16 OS=Homo sapiens OX=9606 GN=IGHV3-16 PE=1 SV=1	A0A0C4
1310	TRUE	A0A0C4DH35|HV335_HUMAN	11.2	16.24	1	1		0	59.305	68.456	66.9202	83.6656	97.643	129.529	273.984	0.00:0.61:0.70:0.69:0.86:1.00:1.33:2.81	64.8938	146.205	0.61:1.39	12810	Probable non-functional immunoglobulin heavy variable 3-35 OS=Homo sapiens OX=9606 GN=IGHV3-35 PE=1 SV=1	A0A0C4
1310	TRUE	A0A0B4J1X5|HV374_HUMAN	11.2	16.24	1	1		0	59.305	68.456	66.9202	83.6656	97.643	129.529	273.984	0.00:0.61:0.70:0.69:0.86:1.00:1.33:2.81	64.8938	146.205	0.61:1.39	12840	Immunoglobulin heavy variable 3-74 OS=Homo sapiens OX=9606 GN=IGHV3-74 PE=3 SV=1	A0A0B4
1310	TRUE	A0A0B4J1Y9|HV372_HUMAN	11.2	15.97	1	1		0	59.305	68.456	66.9202	83.6656	97.643	129.529	273.984	0.00:0.61:0.70:0.69:0.86:1.00:1.33:2.81	64.8938	146.205	0.61:1.39	13203	Immunoglobulin heavy variable 3-72 OS=Homo sapiens OX=9606 GN=IGHV3-72 PE=3 SV=1	A0A0B4
629	TRUE	O60353|FZD6_HUMAN	61.09	1.98	1	1		0	0	0	0	137.213	188.008	0	0	0.00:0.00:0.00:0.00:3.38:4.62:0.00:0.00	0	162.61	0.00:2.00	79292	Frizzled-6 OS=Homo sapiens OX=9606 GN=FZD6 PE=1 SV=2	O60353
981	TRUE	P13473|LAMP2_HUMAN	17.79	7.07	3	3		328.291	571.017	234.158	485.046	2991.95	3365.39	702.417	992.579	0.27:0.47:0.19:0.40:2.48:2.78:0.58:0.82	404.628	2013.08	0.33:1.67	44961	Lysosome-associated membrane glycoprotein 2 OS=Homo sapiens OX=9606 GN=LAMP2 PE=1 SV=2	P13473
203	TRUE	Q14574|DSC3_HUMAN	10.41	11.5	8	8	Oxidation (M)	498.885	745.695	961.492	1002.93	948.124	1030.26	14199.6	12397.4	0.13:0.19:0.24:0.25:0.24:0.26:3.57:3.12	802.252	7143.85	0.20:1.80	99969	Desmocollin-3 OS=Homo sapiens OX=9606 GN=DSC3 PE=1 SV=3	Q14574
137	TRUE	Q02413|DSG1_HUMAN	9.73	23.45	23	23	Oxidation (M)	1047.7	4192.4	1142.3	5311.7	3087.84	3245.62	99784.2	102028	0.04:0.15:0.04:0.19:0.11:0.12:3.63:3.71	3036.91	53420.8	0.11:1.89	113748	Desmoglein-1 OS=Homo sapiens OX=9606 GN=DSG1 PE=1 SV=2	Q02413
166	TRUE	P54760|EPHB4_HUMAN	3.88	2.23	4	1	Carbamidomethylation	241.158	619.562	225.012	1583.08	396.085	153.59	527.617	249.94	0.48:1.24:0.45:3.17:0.79:0.31:1.06:0.50	667.202	331.808	1.34:0.66	108270	Ephrin type-B receptor 4 OS=Homo sapiens OX=9606 GN=EPHB4 PE=1 SV=2	P54760
868	TRUE	P21926|CD9_HUMAN	24.36	4.39	2	2		4764.13	4352.69	7224.95	7066.87	20555.3	20889	10788	12288	0.43:0.40:0.66:0.64:1.87:1.90:0.98:1.12	5852.16	16130.1	0.53:1.47	25416	CD9 antigen OS=Homo sapiens OX=9606 GN=CD9 PE=1 SV=4	P21926
332	TRUE	P56199|ITA1_HUMAN	27.24	1.02	1	1		307.966	341.712	235.429	160.343	1084.72	630.735	678.492	697.354	0.60:0.66:0.46:0.31:2.10:1.22:1.31:1.35	261.363	772.826	0.51:1.49	130848	Integrin alpha-1 OS=Homo sapiens OX=9606 GN=ITGA1 PE=1 SV=2	P56199
330	TRUE	P19634|SL9A1_HUMAN	0.86	10.67	7	7	Oxidation (M)	2042.62	1820.95	8380	7551.13	4365.34	4694.55	2148.44	3498.08	0.47:0.42:1.94:1.75:1.01:1.09:0.50:0.81	4948.67	3676.6	1.15:0.85	90763	Sodium/hydrogen exchanger 1 OS=Homo sapiens OX=9606 GN=SLC9A1 PE=1 SV=2	P19634
83	TRUE	P29323|EPHB2_HUMAN	20.87	8.91	10	7	Oxidation (M)	986.825	888.216	933.028	1066.63	1158.62	2224.57	2530.49	2375.3	0.65:0.58:0.61:0.70:0.76:1.46:1.66:1.56	968.674	2072.25	0.64:1.36	117493	Ephrin type-B receptor 2 OS=Homo sapiens OX=9606 GN=EPHB2 PE=1 SV=5	P29323
960	TRUE	P20645|MPRD_HUMAN	4.01	7.58	2	2	Carbamidomethylation	23338.2	21762.9	656.053	430.368	2976.62	3342.38	371.964	422.384	3.50:3.27:0.10:0.06:0.45:0.50:0.06:0.06	11546.9	1778.34	1.73:0.27	30993	Cation-dependent mannose-6-phosphate receptor OS=Homo sapiens OX=9606 GN=M6PR PE=1 SV=1	P20645
67	TRUE	Q13308|PTK7_HUMAN	18.43	8.41	8	8		630.159	552.781	1176.53	932.473	3272.46	4033.23	1535.57	1414.1	0.37:0.33:0.69:0.55:1.93:2.38:0.91:0.84	822.986	2563.84	0.49:1.51	118392	Inactive tyrosine-protein kinase 7 OS=Homo sapiens OX=9606 GN=PTK7 PE=1 SV=2	Q13308
618	TRUE	O75976|CBPD_HUMAN	4.75	0.87	1	1		3512.6	3380.64	1024.28	876.417	708.317	607.216	207.653	4952.32	1.84:1.77:0.54:0.46:0.37:0.32:0.11:2.59	2198.48	1618.88	1.15:0.85	152931	Carboxypeptidase D OS=Homo sapiens OX=9606 GN=CPD PE=1 SV=2	O75976
814	TRUE	P58335|ANTR2_HUMAN	13.87	2.86	1	1		256.778	204.145	0	0	53.3926	0	0	0	3.99:3.18:0.00:0.00:0.83:0.00:0.00:0.00	230.461	53.3926	1.62:0.38	53666	Anthrax toxin receptor 2 OS=Homo sapiens OX=9606 GN=ANTXR2 PE=1 SV=5	P58335
358	TRUE	Q8WWI5|CTL1_HUMAN	13.01	12.48	7	7	Carbamidomethylation; Oxidation (M)	1987.58	1380.29	2319.14	2712.3	16971.7	20818.9	3030.75	3197.72	0.30:0.21:0.35:0.41:2.59:3.18:0.46:0.49	2099.83	11004.8	0.32:1.68	73302	Choline transporter-like protein 1 OS=Homo sapiens OX=9606 GN=SLC44A1 PE=1 SV=1	Q8WWI5
51	TRUE	P29317|EPHA2_HUMAN	13.47	20.59	17	15	Oxidation (M)	1854.47	3831.74	9584.24	9514.14	19075.6	20924.3	11714.8	10778.4	0.17:0.35:0.88:0.87:1.75:1.92:1.07:0.99	6196.15	15623.3	0.57:1.43	108266	Ephrin type-A receptor 2 OS=Homo sapiens OX=9606 GN=EPHA2 PE=1 SV=2	P29317
237	TRUE	Q96J84|KIRR1_HUMAN	2.05	1.45	1	1		174.767	187.558	148.056	207.274	211.529	308.642	88.5862	89.3413	0.99:1.06:0.84:1.17:1.20:1.74:0.50:0.50	179.414	174.525	1.01:0.99	83536	Kin of IRRE-like protein 1 OS=Homo sapiens OX=9606 GN=KIRREL1 PE=1 SV=2	Q96J84
1081	TRUE	Q5T3F8|CSCL2_HUMAN	3.19	1.08	1	1		74.7251	0	159.736	167.072	64.0029	0	113.566	125.533	0.85:0.00:1.81:1.90:0.73:0.00:1.29:1.43	133.845	101.034	1.14:0.86	94958	CSC1-like protein 2 OS=Homo sapiens OX=9606 GN=TMEM63B PE=1 SV=1	Q5T3F8
97	TRUE	P00533|EGFR_HUMAN	16.52	10.17	11	10	Oxidation (M)	623.458	695.743	1956.33	1249.33	2836.11	5602.87	2217.31	2129.3	0.29:0.32:0.90:0.58:1.31:2.59:1.02:0.98	1131.22	3196.4	0.52:1.48	134277	Epidermal growth factor receptor OS=Homo sapiens OX=9606 GN=EGFR PE=1 SV=2	P00533
788	TRUE	Q9Y287|ITM2B_HUMAN	1.55	3.76	1	1		265.872	261.484	1714.75	1393.86	942.28	636.762	361.456	302.49	0.36:0.36:2.33:1.90:1.28:0.87:0.49:0.41	908.991	560.747	1.24:0.76	30338	Integral membrane protein 2B OS=Homo sapiens OX=9606 GN=ITM2B PE=1 SV=1	Q9Y287
50	TRUE	P05023|AT1A1_HUMAN	1.08	27.66	38	25	Carbamidomethylation; Oxidation (M)	36683.7	37185.4	70646.4	69050.9	73114.9	76255.9	29674.6	27201.5	0.70:0.71:1.35:1.32:1.39:1.45:0.57:0.52	53391.6	51561.7	1.02:0.98	112896	Sodium/potassium-transporting ATPase subunit alpha-1 OS=Homo sapiens OX=9606 GN=ATP1A1 PE=1 SV=1	P05023
319	TRUE	Q8IWA5|CTL2_HUMAN	11.4	16.57	12	12	Acetylation (N-term); Carbamidomethylation	2241.28	4029.98	4121.16	5090.74	24311	29024.2	5101.72	4781.16	0.23:0.41:0.42:0.52:2.47:2.95:0.52:0.49	3870.79	15804.5	0.39:1.61	80124	Choline transporter-like protein 2 OS=Homo sapiens OX=9606 GN=SLC44A2 PE=1 SV=3	Q8IWA5
790	TRUE	Q7Z402|TMC7_HUMAN	14.03	5.39	4	4	Oxidation (M)	222.468	273.751	629.932	652.961	1527.26	2191.61	767.816	647.403	0.26:0.32:0.73:0.76:1.77:2.54:0.89:0.75	465.401	1283.52	0.53:1.47	83502	Transmembrane channel-like protein 7 OS=Homo sapiens OX=9606 GN=TMC7 PE=1 SV=1	Q7Z402
778	TRUE	P48029|SC6A8_HUMAN	1.04	7.87	4	4		847.663	977.411	2085.32	1656.67	1580.5	2306.27	647.915	803.348	0.62:0.72:1.53:1.22:1.16:1.69:0.48:0.59	1391.77	1334.51	1.02:0.98	70523	Sodium- and chloride-dependent creatine transporter 1 OS=Homo sapiens OX=9606 GN=SLC6A8 PE=1 SV=1	P48029
936	TRUE	O60669|MOT2_HUMAN	12.12	6.69	3	3		1033.02	830.891	3523.84	3682.27	7504.54	9631.45	3222.27	3759.16	0.25:0.20:0.85:0.89:1.81:2.32:0.78:0.91	2267.51	6029.36	0.55:1.45	52200	Monocarboxylate transporter 2 OS=Homo sapiens OX=9606 GN=SLC16A7 PE=1 SV=2	O60669
842	TRUE	P27701|CD82_HUMAN	8.74	13.86	3	3	Oxidation (M)	715.82	2304.42	5682.12	1456.14	17145	18474.6	2641.35	2337.08	0.11:0.36:0.90:0.23:2.70:2.91:0.42:0.37	2583.08	10149.5	0.41:1.59	29626	CD82 antigen OS=Homo sapiens OX=9606 GN=CD82 PE=1 SV=1	P27701
62	TRUE	Q9UIW2|PLXA1_HUMAN	2.53	7.44	20	11	Oxidation (M)	3039.76	2523.55	2219.35	2524.13	2634.51	4710.47	2323.48	2331.96	1.09:0.91:0.80:0.91:0.94:1.69:0.83:0.84	2576.7	3000.11	0.92:1.08	211067	Plexin-A1 OS=Homo sapiens OX=9606 GN=PLXNA1 PE=1 SV=3	Q9UIW2
25	TRUE	P08195|4F2_HUMAN	17.31	50.79	43	43	Oxidation (M)	66046.3	67030.9	126380	127205	305378	349742	157175	157794	0.39:0.40:0.75:0.75:1.80:2.06:0.93:0.93	96665.6	242522	0.57:1.43	67994	4F2 cell-surface antigen heavy chain OS=Homo sapiens OX=9606 GN=SLC3A2 PE=1 SV=3	P08195
602	TRUE	O15118|NPC1_HUMAN	12.42	0.94	1	1		0	0	50.9315	0	114.32	153.897	0	0	0.00:0.00:1.28:0.00:2.87:3.86:0.00:0.00	50.9315	134.108	0.55:1.45	142167	NPC intracellular cholesterol transporter 1 OS=Homo sapiens OX=9606 GN=NPC1 PE=1 SV=2	O15118
637	TRUE	P35613|BASI_HUMAN	14.28	15.32	4	4	Oxidation (M)	3611.36	3898.3	9085.09	9244.57	19792.9	23065.7	9970.78	9884.07	0.33:0.35:0.82:0.84:1.79:2.08:0.90:0.89	6459.83	15678.4	0.58:1.42	42200	Basigin OS=Homo sapiens OX=9606 GN=BSG PE=1 SV=2	P35613
197	TRUE	P46531|NOTC1_HUMAN	0.45	1.84	3	3	Oxidation (M)	411.269	722.097	4252.1	4086.79	1646.7	2117.89	1441.4	1403.55	0.20:0.36:2.12:2.03:0.82:1.05:0.72:0.70	2457.31	1741.52	1.17:0.83	272505	Neurogenic locus notch homolog protein 1 OS=Homo sapiens OX=9606 GN=NOTCH1 PE=1 SV=4	P46531
1161	TRUE	O95471|CLD7_HUMAN	5.73	7.58	1	1	Oxidation (M)	415.238	2068.7	1295.77	1092.26	8441.99	10181.5	676.288	971.471	0.13:0.66:0.41:0.35:2.69:3.24:0.22:0.31	1217.99	5067.82	0.39:1.61	22418	Claudin-7 OS=Homo sapiens OX=9606 GN=CLDN7 PE=1 SV=4	O95471
324	TRUE	Q13733|AT1A4_HUMAN	3.82	1.46	7	1		731647	778450	598336	374617	599084	1.01111e+06	918668	516761	1.06:1.13:0.87:0.54:0.87:1.46:1.33:0.75	620762	761406	0.90:1.10	114166	Sodium/potassium-transporting ATPase subunit alpha-4 OS=Homo sapiens OX=9606 GN=ATP1A4 PE=1 SV=3	Q13733
318	TRUE	Q01650|LAT1_HUMAN	13.05	15.19	5	5	Carbamidomethylation; Oxidation (M)	11722	10953.5	15291.3	16322.6	64875.6	55114.3	17289.4	18463.8	0.45:0.42:0.58:0.62:2.47:2.10:0.66:0.70	13572.3	38935.8	0.52:1.48	55010	Large neutral amino acids transporter small subunit 1 OS=Homo sapiens OX=9606 GN=SLC7A5 PE=1 SV=2	Q01650
42	TRUE	O75051|PLXA2_HUMAN	13.02	15.52	32	24	Oxidation (M)	2401.18	2423.11	5942.11	5654.79	13096	14807.7	6188.14	5477.16	0.34:0.35:0.85:0.81:1.87:2.12:0.88:0.78	4105.3	9892.25	0.59:1.41	211104	Plexin-A2 OS=Homo sapiens OX=9606 GN=PLXNA2 PE=1 SV=4	O75051
344	TRUE	P54709|AT1B3_HUMAN	0.19	30.11	8	8	Oxidation (M)	5129.73	4993.8	14992.3	14195.1	12255.3	14375.8	5443.37	6212.12	0.53:0.51:1.55:1.46:1.26:1.48:0.56:0.64	9827.73	9571.65	1.01:0.99	31513	Sodium/potassium-transporting ATPase subunit beta-3 OS=Homo sapiens OX=9606 GN=ATP1B3 PE=1 SV=1	P54709
43	TRUE	O15031|PLXB2_HUMAN	9.74	17.41	23	23	Oxidation (M)	965.924	820.681	3289.05	3535.05	8335.62	8783.44	2557.31	2589.2	0.25:0.21:0.85:0.92:2.16:2.28:0.66:0.67	2152.68	5566.39	0.56:1.44	205127	Plexin-B2 OS=Homo sapiens OX=9606 GN=PLXNB2 PE=1 SV=3	O15031
10	TRUE	P16144|ITB4_HUMAN	13.51	25.3	41	41	Carbamidomethylation; Oxidation (M)	18802.7	18387.4	49952	49568.9	91851.9	107965	51783.5	52800.4	0.34:0.33:0.91:0.90:1.67:1.96:0.94:0.96	34177.7	76100.1	0.62:1.38	202167	Integrin beta-4 OS=Homo sapiens OX=9606 GN=ITGB4 PE=1 SV=5	P16144
29	TRUE	P23229|ITA6_HUMAN	13.24	38.23	33	33	Carbamidomethylation; Oxidation (M)	17292.8	17176.6	40342.3	39534.4	93521.3	95734.5	41083.9	39818.5	0.36:0.36:0.84:0.82:1.95:1.99:0.85:0.83	28586.5	67539.6	0.59:1.41	126606	Integrin alpha-6 OS=Homo sapiens OX=9606 GN=ITGA6 PE=1 SV=5	P23229
725	TRUE	P18084|ITB5_HUMAN	12.45	3.13	2	2		726.334	524.274	1568.86	1775.75	3770.53	3694.77	1673.77	1612.44	0.38:0.27:0.82:0.93:1.97:1.93:0.87:0.84	1148.8	2687.88	0.60:1.40	88054	Integrin beta-5 OS=Homo sapiens OX=9606 GN=ITGB5 PE=1 SV=1	P18084
453	TRUE	P13726|TF_HUMAN	9.65	25.08	7	7		24915.3	25349.8	46007.4	48048	150022	169448	39402.9	39368.2	0.37:0.37:0.68:0.71:2.21:2.50:0.58:0.58	36080.1	99560.2	0.53:1.47	33068	Tissue factor OS=Homo sapiens OX=9606 GN=F3 PE=1 SV=1	P13726
395	TRUE	Q06481|APLP2_HUMAN	7.1	1.83	1	1	Oxidation (M)	80.0476	101.814	116.168	131.013	91.0726	93.9757	867.659	535.084	0.32:0.40:0.46:0.52:0.36:0.37:3.44:2.12	107.261	396.948	0.43:1.57	86956	Amyloid-like protein 2 OS=Homo sapiens OX=9606 GN=APLP2 PE=1 SV=2	Q06481
703	TRUE	P05362|ICAM1_HUMAN	6.85	2.63	1	1		0	0	245.264	279.32	0	164.018	0	55.1623	0.00:0.00:2.64:3.00:0.00:1.76:0.00:0.59	262.292	109.59	1.41:0.59	57825	Intercellular adhesion molecule 1 OS=Homo sapiens OX=9606 GN=ICAM1 PE=1 SV=2	P05362
219	TRUE	Q9Y6M7|S4A7_HUMAN	5.43	7	7	7	Oxidation (M)	32408.5	30750.4	1918.91	1579.47	31702.7	535.685	658.564	625.532	2.59:2.46:0.15:0.13:2.53:0.04:0.05:0.05	16733.6	16218.3	1.02:0.98	136044	Sodium bicarbonate cotransporter 3 OS=Homo sapiens OX=9606 GN=SLC4A7 PE=1 SV=2	Q9Y6M7
74	TRUE	P08069|IGF1R_HUMAN	2.24	1.61	2	2		300.045	164.658	480.663	593.974	389.934	646.343	313.705	367.748	0.74:0.40:1.18:1.46:0.96:1.59:0.77:0.90	384.835	429.432	0.95:1.05	154793	Insulin-like growth factor 1 receptor OS=Homo sapiens OX=9606 GN=IGF1R PE=1 SV=1	P08069
1200	TRUE	O95858|TSN15_HUMAN	5.79	6.8	2	2	Oxidation (M)	305.731	71.2312	137.614	498.433	1427.56	1471.3	127.199	236.452	0.57:0.13:0.26:0.93:2.67:2.75:0.24:0.44	283.675	815.626	0.52:1.48	33165	Tetraspanin-15 OS=Homo sapiens OX=9606 GN=TSPAN15 PE=1 SV=1	O95858
633	TRUE	P30511|HLAF_HUMAN	17.4	13.29	3	3		352.164	330.474	500.859	486.031	1115.86	1424.69	684.651	565.085	0.52:0.48:0.73:0.71:1.64:2.09:1.00:0.83	458.466	1088.41	0.59:1.41	39062	HLA class I histocompatibility antigen, alpha chain F OS=Homo sapiens OX=9606 GN=HLA-F PE=1 SV=3	P30511
102	TRUE	P06756|ITAV_HUMAN	0.35	20.32	18	18	Oxidation (M)	5788.67	6318.82	22910.5	23004.7	18992.6	18970	7248.99	6055.36	0.42:0.46:1.68:1.68:1.39:1.39:0.53:0.44	14505.7	12816.7	1.06:0.94	116038	Integrin alpha-V OS=Homo sapiens OX=9606 GN=ITGAV PE=1 SV=2	P06756
432	TRUE	Q969P0|IGSF8_HUMAN	0.36	21.53	9	9	Oxidation (M)	5516.69	6799.34	9753.85	13595.1	10768.1	15941.7	5066.71	6542.87	0.60:0.74:1.05:1.47:1.16:1.72:0.55:0.71	8916.25	9579.83	0.96:1.04	65034	Immunoglobulin superfamily member 8 OS=Homo sapiens OX=9606 GN=IGSF8 PE=1 SV=1	Q969P0
948	TRUE	Q6PCB8|EMB_HUMAN	9.19	3.98	1	1		408.569	408.61	651.556	317.516	1834.98	2064.51	452.294	483.02	0.49:0.49:0.79:0.38:2.22:2.49:0.55:0.58	446.563	1208.7	0.54:1.46	36881	Embigin OS=Homo sapiens OX=9606 GN=EMB PE=1 SV=1	Q6PCB8
1211	TRUE	Q8NFJ5|RAI3_HUMAN	8.91	3.64	1	1		152.427	193.54	395.875	379.343	1028.13	1183.49	294.47	296.257	0.31:0.39:0.81:0.77:2.10:2.41:0.60:0.60	280.296	700.588	0.57:1.43	40251	Retinoic acid-induced protein 3 OS=Homo sapiens OX=9606 GN=GPRC5A PE=1 SV=2	Q8NFJ5
824	TRUE	Q92542|NICA_HUMAN	19.48	1.55	1	1		79.9405	95.9817	142.164	85.9153	273.707	287.854	170.236	147.467	0.50:0.60:0.89:0.54:1.71:1.79:1.06:0.92	101	219.816	0.63:1.37	78411	Nicastrin OS=Homo sapiens OX=9606 GN=NCSTN PE=1 SV=2	Q92542
9	TRUE	P10586|PTPRF_HUMAN	10.65	1.68	4	2		394.745	282.437	736.784	930.569	1465.01	2901.94	707.494	817.086	0.38:0.27:0.72:0.90:1.42:2.82:0.69:0.79	586.134	1472.88	0.57:1.43	212879	Receptor-type tyrosine-protein phosphatase F OS=Homo sapiens OX=9606 GN=PTPRF PE=1 SV=2	P10586
82	TRUE	P12830|CADH1_HUMAN	12.31	12.59	9	9	Oxidation (M)	1330.79	2499.56	2819.29	1845.85	5615.89	10387	2500.2	3287.74	0.35:0.66:0.74:0.49:1.48:2.74:0.66:0.87	2123.87	5447.7	0.56:1.44	97456	Cadherin-1 OS=Homo sapiens OX=9606 GN=CDH1 PE=1 SV=3	P12830
1275	TRUE	A0A075B6P5|KV228_HUMAN	4.6	10.83	1	1		472.018	400.535	352.471	353.071	88.157	1056.08	88.7138	254.208	1.23:1.05:0.92:0.92:0.23:2.76:0.23:0.66	394.524	371.791	1.03:0.97	12957	Immunoglobulin kappa variable 2-28 OS=Homo sapiens OX=9606 GN=IGKV2-28 PE=3 SV=1	A0A075
1275	TRUE	A0A075B6S6|KVD30_HUMAN	4.6	10.83	1	1		472.018	400.535	352.471	353.071	88.157	1056.08	88.7138	254.208	1.23:1.05:0.92:0.92:0.23:2.76:0.23:0.66	394.524	371.791	1.03:0.97	13215	Immunoglobulin kappa variable 2D-30 OS=Homo sapiens OX=9606 GN=IGKV2D-30 PE=3 SV=1	A0A075
1275	TRUE	A0A075B6S2|KVD29_HUMAN	4.6	10.83	1	1		472.018	400.535	352.471	353.071	88.157	1056.08	88.7138	254.208	1.23:1.05:0.92:0.92:0.23:2.76:0.23:0.66	394.524	371.791	1.03:0.97	13143	Immunoglobulin kappa variable 2D-29 OS=Homo sapiens OX=9606 GN=IGKV2D-29 PE=3 SV=1	A0A075
608	TRUE	P05026|AT1B1_HUMAN	1.28	16.17	4	4	Carbamidomethylation	9530.6	7071.64	18619.1	15001	18805.6	20385.3	6900.07	3795.6	0.76:0.57:1.49:1.20:1.50:1.63:0.55:0.30	12555.6	12471.6	1.00:1.00	35061	Sodium/potassium-transporting ATPase subunit beta-1 OS=Homo sapiens OX=9606 GN=ATP1B1 PE=1 SV=1	P05026
662	TRUE	Q9Y289|SC5A6_HUMAN	0.44	1.73	1	1	Oxidation (M)	394.655	371.7	737.812	562.844	765.534	853.871	365.212	297.886	0.73:0.68:1.36:1.04:1.41:1.57:0.67:0.55	516.753	570.626	0.95:1.05	68642	Sodium-dependent multivitamin transporter OS=Homo sapiens OX=9606 GN=SLC5A6 PE=2 SV=2	Q9Y289
1361	TRUE	P19256|LFA3_HUMAN	11.19	4	1	1		1007.68	893.512	3324.24	3097.07	5092.86	6269.81	3019.66	2960.29	0.31:0.28:1.04:0.97:1.59:1.95:0.94:0.92	2080.62	4335.66	0.65:1.35	28147	Lymphocyte function-associated antigen 3 OS=Homo sapiens OX=9606 GN=CD58 PE=1 SV=1	P19256
207	TRUE	Q6P4Q7|CNNM4_HUMAN	10.99	6.45	4	4	Oxidation (M)	394.099	376.954	1153.72	1106.05	1774.14	2488.09	1268.86	864.722	0.33:0.32:0.98:0.94:1.51:2.11:1.08:0.73	757.705	1598.95	0.64:1.36	86607	Metal transporter CNNM4 OS=Homo sapiens OX=9606 GN=CNNM4 PE=1 SV=3	Q6P4Q7
1071	TRUE	P14384|CBPM_HUMAN	10.97	2.26	1	1		0	0	0	52.9101	112.159	69.4593	0	0	0.00:0.00:0.00:1.80:3.83:2.37:0.00:0.00	52.9101	90.8092	0.74:1.26	50514	Carboxypeptidase M OS=Homo sapiens OX=9606 GN=CPM PE=1 SV=2	P14384
577	TRUE	Q99805|TM9S2_HUMAN	5.5	6.79	4	4	Oxidation (M)	1181.23	2227.7	847.951	842.048	1571.82	1321.87	1642.03	1671.13	0.84:1.58:0.60:0.60:1.11:0.94:1.16:1.18	1714.5	1551.71	1.05:0.95	75776	Transmembrane 9 superfamily member 2 OS=Homo sapiens OX=9606 GN=TM9SF2 PE=1 SV=1	Q99805
272	TRUE	Q9NPH3|IL1AP_HUMAN	2.98	3.68	2	2		0	82.1052	209.187	194.969	437.703	420.209	176.967	75.6336	0.00:0.41:1.05:0.98:2.19:2.11:0.89:0.38	196.317	315.861	0.77:1.23	65418	Interleukin-1 receptor accessory protein OS=Homo sapiens OX=9606 GN=IL1RAP PE=1 SV=2	Q9NPH3
235	TRUE	P32926|DSG3_HUMAN	8.62	3.7	3	3	Oxidation (M)	333.145	176.776	433.092	726.312	593.956	5503.64	657.625	607.662	0.30:0.16:0.38:0.64:0.53:4.87:0.58:0.54	474.92	1840.72	0.41:1.59	107533	Desmoglein-3 OS=Homo sapiens OX=9606 GN=DSG3 PE=1 SV=2	P32926
1260	TRUE	O75712|CXB3_HUMAN	3.96	9.63	2	2		973.089	218.273	911.967	635.912	2780.93	3153.07	378.405	423.268	0.82:0.18:0.77:0.54:2.35:2.66:0.32:0.36	684.81	1683.92	0.58:1.42	30818	Gap junction beta-3 protein OS=Homo sapiens OX=9606 GN=GJB3 PE=1 SV=1	O75712
69	TRUE	P26006|ITA3_HUMAN	10.8	28.16	23	23	Carbamidomethylation; Oxidation (M)	19169.3	20065.8	44417.7	44637.9	81582.6	90559.8	42564.8	36866.9	0.40:0.42:0.94:0.94:1.72:1.91:0.90:0.78	32072.7	62893.6	0.68:1.32	116612	Integrin alpha-3 OS=Homo sapiens OX=9606 GN=ITGA3 PE=1 SV=5	P26006
589	TRUE	Q5ZPR3|CD276_HUMAN	0.25	13.11	4	4		2998.5	2814.24	6152.56	5234.78	6685.6	7740.39	2198.66	2129.69	0.67:0.63:1.37:1.16:1.49:1.72:0.49:0.47	4349.33	4688.59	0.96:1.04	57235	CD276 antigen OS=Homo sapiens OX=9606 GN=CD276 PE=1 SV=1	Q5ZPR3
1229	TRUE	Q9UP38|FZD1_HUMAN	0.2	2.01	1	1		0	2018.19	82.1416	63.6985	318.244	318.473	263.24	109.486	0.00:5.09:0.21:0.16:0.80:0.80:0.66:0.28	721.343	252.361	1.48:0.52	71158	Frizzled-1 OS=Homo sapiens OX=9606 GN=FZD1 PE=1 SV=2	Q9UP38
658	TRUE	Q9H6B4|CLMP_HUMAN	3.31	6.97	1	1		303.721	304.336	375.72	84.0894	353.511	511.756	232.912	234.061	1.01:1.01:1.25:0.28:1.18:1.71:0.78:0.78	266.967	333.06	0.89:1.11	41281	CXADR-like membrane protein OS=Homo sapiens OX=9606 GN=CLMP PE=1 SV=1	Q9H6B4
857	TRUE	O15431|COPT1_HUMAN	7.19	10	1	1	Oxidation (M)	321.61	110.037	315.879	260.762	261.617	1871.96	325.658	382.084	0.67:0.23:0.66:0.54:0.54:3.89:0.68:0.79	252.072	710.329	0.52:1.48	21091	High affinity copper uptake protein 1 OS=Homo sapiens OX=9606 GN=SLC31A1 PE=1 SV=1	O15431
1493	TRUE	P56749|CLD12_HUMAN	2	6.15	1	1		235.818	231.176	284.641	310.794	934.208	933.603	340.099	60.415	0.57:0.56:0.68:0.75:2.24:2.24:0.82:0.15	265.608	567.082	0.64:1.36	27110	Claudin-12 OS=Homo sapiens OX=9606 GN=CLDN12 PE=1 SV=1	P56749
1199	TRUE	Q08722|CD47_HUMAN	8.77	3.41	1	1		249.297	273.889	496.078	578.548	630.741	1784.85	462.961	510.582	0.40:0.44:0.80:0.93:1.01:2.86:0.74:0.82	399.453	847.282	0.64:1.36	35214	Leukocyte surface antigen CD47 OS=Homo sapiens OX=9606 GN=CD47 PE=1 SV=1	Q08722
98	TRUE	P23634|AT2B4_HUMAN	9.42	15.95	24	15	Carbamidomethylation; Oxidation (M)	3392.2	3334.04	17259.7	17506.1	20547.9	24945.4	15665.8	15621.6	0.23:0.23:1.17:1.18:1.39:1.69:1.06:1.06	10373	19195.2	0.70:1.30	137920	Plasma membrane calcium-transporting ATPase 4 OS=Homo sapiens OX=9606 GN=ATP2B4 PE=1 SV=2	P23634
810	TRUE	Q9Y639|NPTN_HUMAN	0.79	2.51	1	1		75.9778	0	0	0	382.402	0	0	0	1.33:0.00:0.00:0.00:6.67:0.00:0.00:0.00	75.9778	382.402	0.33:1.67	44387	Neuroplastin OS=Homo sapiens OX=9606 GN=NPTN PE=1 SV=2	Q9Y639
115	TRUE	Q8IZJ1|UNC5B_HUMAN	5.29	2.43	2	2		147.07	80.3523	359.508	349.233	313.961	241.445	304.399	351.996	0.55:0.30:1.34:1.30:1.17:0.90:1.13:1.31	234.041	302.95	0.87:1.13	103638	Netrin receptor UNC5B OS=Homo sapiens OX=9606 GN=UNC5B PE=1 SV=2	Q8IZJ1
782	TRUE	Q9P1W3|CSC1_HUMAN	7.75	1.86	4	4	Acetylation (N-term); Oxidation (M)	232128	236769	105374	106291	243163	295148	202149	200161	1.15:1.17:0.52:0.52:1.20:1.46:1.00:0.99	170140	235155	0.84:1.16	93317	Calcium permeable stress-gated cation channel 1 OS=Homo sapiens OX=9606 GN=TMEM63C PE=2 SV=1	Q9P1W3
542	TRUE	Q9ULF5|S39AA_HUMAN	0.91	9.75	4	4		1940.87	1748.14	6648.79	7127.54	5700.98	8253.85	2538.33	2206.39	0.43:0.39:1.47:1.58:1.26:1.83:0.56:0.49	4366.34	4674.89	0.97:1.03	94132	Zinc transporter ZIP10 OS=Homo sapiens OX=9606 GN=SLC39A10 PE=1 SV=2	Q9ULF5
181	TRUE	Q08345|DDR1_HUMAN	9.65	0.99	1	1		0	0	0	89.4362	93.3497	105.379	0	0	0.00:0.00:0.00:2.48:2.59:2.93:0.00:0.00	89.4362	99.3642	0.95:1.05	101128	Epithelial discoidin domain-containing receptor 1 OS=Homo sapiens OX=9606 GN=DDR1 PE=1 SV=1	Q08345
922	TRUE	Q9H2H9|S38A1_HUMAN	0.71	6.57	3	3		2113.08	2695.78	3765.05	3642.14	5314.43	6014.06	1370.13	1253.14	0.65:0.82:1.15:1.11:1.62:1.84:0.42:0.38	3147.79	3487.94	0.95:1.05	54048	Sodium-coupled neutral amino acid transporter 1 OS=Homo sapiens OX=9606 GN=SLC38A1 PE=1 SV=1	Q9H2H9
1074	TRUE	Q08334|I10R2_HUMAN	11.42	3.69	1	1		78.226	77.4548	165.597	143.03	176.539	367.602	163.988	158.017	0.47:0.47:1.00:0.86:1.06:2.21:0.99:0.95	116.077	216.537	0.70:1.30	36995	Interleukin-10 receptor subunit beta OS=Homo sapiens OX=9606 GN=IL10RB PE=1 SV=2	Q08334
35	TRUE	Q6YHK3|CD109_HUMAN	1.38	28.79	29	29	Carbamidomethylation; Oxidation (M)	4046.67	4708.88	17144.5	17039.7	13574.9	22356.5	6194.35	6189.46	0.35:0.41:1.50:1.49:1.19:1.96:0.54:0.54	10735	12078.8	0.94:1.06	161689	CD109 antigen OS=Homo sapiens OX=9606 GN=CD109 PE=1 SV=2	Q6YHK3
1012	TRUE	Q96QD8|S38A2_HUMAN	6.06	10.47	3	3		1988.79	999.508	3007.03	2908.61	5648.71	6206.86	2054.45	1931.41	0.64:0.32:0.97:0.94:1.83:2.01:0.66:0.62	2225.98	3960.36	0.72:1.28	56026	Sodium-coupled neutral amino acid transporter 2 OS=Homo sapiens OX=9606 GN=SLC38A2 PE=1 SV=2	Q96QD8
527	TRUE	Q02487|DSC2_HUMAN	4.52	6.33	4	4		896.356	869.817	1211.49	4644.49	1165.33	3111.94	2775.99	2737.12	0.41:0.40:0.56:2.13:0.54:1.43:1.28:1.26	2321.79	2972.22	0.88:1.12	99962	Desmocollin-2 OS=Homo sapiens OX=9606 GN=DSC2 PE=1 SV=1	Q02487
1596	TRUE	P48509|CD151_HUMAN	1.07	3.95	1	1		520.068	570.756	1058	965.818	2221.98	2620.82	394.903	267.777	0.48:0.53:0.98:0.90:2.06:2.43:0.37:0.25	778.66	1376.37	0.72:1.28	28295	CD151 antigen OS=Homo sapiens OX=9606 GN=CD151 PE=1 SV=3	P48509
521	TRUE	Q9NYQ6|CELR1_HUMAN	8.1	0.5	1	1		0	0	126.088	154.194	99.1269	101.278	0	52.3772	0.00:0.00:1.89:2.31:1.49:1.52:0.00:0.79	140.141	84.2608	1.25:0.75	329486	Cadherin EGF LAG seven-pass G-type receptor 1 OS=Homo sapiens OX=9606 GN=CELSR1 PE=1 SV=1	Q9NYQ6
242	TRUE	Q4KMQ2|ANO6_HUMAN	1.81	14.07	9	9	Oxidation (M)	1034.81	1011.37	2727.45	2996.32	3506.11	3098.28	897.575	1942.91	0.48:0.47:1.27:1.39:1.63:1.44:0.42:0.90	1942.49	2361.22	0.90:1.10	106165	Anoctamin-6 OS=Homo sapiens OX=9606 GN=ANO6 PE=1 SV=2	Q4KMQ2
132	TRUE	Q9H5V8|CDCP1_HUMAN	2.71	11.36	7	7		1935.07	2317.22	5320.23	5172.89	6493.53	6365.87	2862.54	2683.14	0.47:0.56:1.28:1.25:1.57:1.54:0.69:0.65	3686.36	4601.27	0.89:1.11	92932	CUB domain-containing protein 1 OS=Homo sapiens OX=9606 GN=CDCP1 PE=1 SV=3	Q9H5V8
749	TRUE	P15529|MCP_HUMAN	0.34	5.61	3	3		1550	1310.39	3150.23	2801.89	4080.18	4268.34	1213.65	1010.39	0.64:0.54:1.30:1.16:1.68:1.76:0.50:0.42	2203.13	2643.14	0.91:1.09	43747	Membrane cofactor protein OS=Homo sapiens OX=9606 GN=CD46 PE=1 SV=3	P15529
99	TRUE	Q9UIQ6|LCAP_HUMAN	2.76	8.2	7	7	Oxidation (M)	855.379	1065.86	1405.86	1303.26	2425.9	1777.71	993.969	814.985	0.64:0.80:1.06:0.98:1.82:1.34:0.75:0.61	1157.59	1503.14	0.87:1.13	117349	Leucyl-cystinyl aminopeptidase OS=Homo sapiens OX=9606 GN=LNPEP PE=1 SV=3	Q9UIQ6
397	TRUE	O95297|MPZL1_HUMAN	0.45	27.14	9	9		7283.55	7088	19861.9	19750.9	23025.3	26642.4	4754.75	9013.34	0.50:0.48:1.35:1.35:1.57:1.82:0.32:0.61	13496.1	15858.9	0.92:1.08	29082	Myelin protein zero-like protein 1 OS=Homo sapiens OX=9606 GN=MPZL1 PE=1 SV=1	O95297
874	TRUE	P48067|SC6A9_HUMAN	9.64	1.42	1	1		72.5062	0	0	0	121.801	56.0054	0	0	2.32:0.00:0.00:0.00:3.89:1.79:0.00:0.00	72.5062	88.903	0.90:1.10	78260	Sodium- and chloride-dependent glycine transporter 1 OS=Homo sapiens OX=9606 GN=SLC6A9 PE=1 SV=3	P48067
652	TRUE	Q9UNN8|EPCR_HUMAN	0.56	3.78	1	1		0	0	57.0079	127.852	145.855	103.094	0	52.7843	0.00:0.00:0.94:2.10:2.40:1.69:0.00:0.87	92.4299	100.578	0.96:1.04	26671	Endothelial protein C receptor OS=Homo sapiens OX=9606 GN=PROCR PE=1 SV=1	Q9UNN8
978	TRUE	Q9C0H2|TTYH3_HUMAN	1.52	4.59	2	2		374.504	238.133	326.937	336.253	932.451	54.6715	404.945	179.414	1.05:0.67:0.92:0.94:2.62:0.15:1.14:0.50	318.957	392.87	0.90:1.10	57545	Protein tweety homolog 3 OS=Homo sapiens OX=9606 GN=TTYH3 PE=1 SV=3	Q9C0H2
1523	TRUE	Q86VE9|SERC5_HUMAN	0.65	2.36	1	1		298.664	287.509	169.935	295.371	528.513	573.179	180.476	108.12	0.98:0.94:0.56:0.97:1.73:1.88:0.59:0.35	262.87	347.572	0.86:1.14	47009	Serine incorporator 5 OS=Homo sapiens OX=9606 GN=SERINC5 PE=2 SV=1	Q86VE9
726	TRUE	Q13433|S39A6_HUMAN	4.06	3.97	3	3		233.515	286.026	1538.82	1227.22	1737.98	2472.26	520.662	565.306	0.22:0.27:1.43:1.14:1.62:2.30:0.49:0.53	875.694	1377.38	0.78:1.22	85047	Zinc transporter ZIP6 OS=Homo sapiens OX=9606 GN=SLC39A6 PE=1 SV=3	Q13433
912	TRUE	P43007|SATT_HUMAN	8.9	8.08	3	3		496.906	607.531	805.227	785.723	797.914	612.898	1799.81	1876.65	0.51:0.62:0.83:0.81:0.82:0.63:1.85:1.93	697.645	1271.82	0.71:1.29	55723	Neutral amino acid transporter A OS=Homo sapiens OX=9606 GN=SLC1A4 PE=1 SV=1	P43007
172	TRUE	P54753|EPHB3_HUMAN	11.34	5.11	7	4	Oxidation (M)	1084.46	1750.93	795.503	338.601	1679.8	2441.32	2364.24	1346.89	0.74:1.19:0.54:0.23:1.14:1.65:1.60:0.91	992.374	1958.06	0.67:1.33	110330	Ephrin type-B receptor 3 OS=Homo sapiens OX=9606 GN=EPHB3 PE=1 SV=2	P54753
894	TRUE	P30825|SL7A1_HUMAN	4.04	4.77	3	2	Oxidation (M)	582.769	461.351	1529.55	1410.69	1644.55	1929.61	743.982	979.519	0.50:0.40:1.32:1.22:1.42:1.66:0.64:0.84	996.091	1324.41	0.86:1.14	67638	High affinity cationic amino acid transporter 1 OS=Homo sapiens OX=9606 GN=SLC7A1 PE=1 SV=1	P30825
329	TRUE	Q9C0B5|ZDHC5_HUMAN	4.02	7.83	4	4	Oxidation (M)	400.479	459.482	814.289	1275.72	571.464	1917.97	770.032	881.197	0.45:0.52:0.92:1.44:0.64:2.16:0.87:0.99	737.493	1035.17	0.83:1.17	77545	Palmitoyltransferase ZDHHC5 OS=Homo sapiens OX=9606 GN=ZDHHC5 PE=1 SV=2	Q9C0B5
261	TRUE	P53985|MOT1_HUMAN	1.54	14.6	11	11	Oxidation (M)	24332.5	28581.1	54891	53590	98174.6	112550	22127.1	19185	0.47:0.55:1.06:1.04:1.90:2.18:0.43:0.37	40348.6	63009.2	0.78:1.22	53944	Monocarboxylate transporter 1 OS=Homo sapiens OX=9606 GN=SLC16A1 PE=1 SV=3	P53985
236	TRUE	P04439|HLAA_HUMAN	5.2	18.36	11	6		12554.2	12020.4	27818.1	28273.8	48436.7	42998.4	17604.9	17080.6	0.49:0.47:1.08:1.09:1.87:1.66:0.68:0.66	20166.6	31530.2	0.78:1.22	40841	HLA class I histocompatibility antigen, A alpha chain OS=Homo sapiens OX=9606 GN=HLA-A PE=1 SV=2	P04439
605	TRUE	Q9Y653|AGRG1_HUMAN	0.35	6.64	3	3		0	267.397	601.947	563.712	699.785	439.556	384.37	304.872	0.00:0.66:1.48:1.38:1.72:1.08:0.94:0.75	477.686	529.23	0.95:1.05	77738	Adhesion G-protein coupled receptor G1 OS=Homo sapiens OX=9606 GN=ADGRG1 PE=1 SV=2	Q9Y653
87	TRUE	P05556|ITB1_HUMAN	1.93	20.68	18	18	Oxidation (M)	45657.7	45941.8	101161	102295	138808	154125	50295	44291.5	0.54:0.54:1.19:1.20:1.63:1.81:0.59:0.52	73763.9	96880	0.86:1.14	88415	Integrin beta-1 OS=Homo sapiens OX=9606 GN=ITGB1 PE=1 SV=2	P05556
276	TRUE	P78310|CXAR_HUMAN	4.28	21.64	7	7	Oxidation (M)	1866.1	2124.9	2464.18	2100.43	2752.66	5861.51	1783.03	2035.74	0.71:0.81:0.94:0.80:1.05:2.23:0.68:0.78	2138.9	3108.23	0.82:1.18	40030	Coxsackievirus and adenovirus receptor OS=Homo sapiens OX=9606 GN=CXADR PE=1 SV=1	P78310
326	TRUE	P98172|EFNB1_HUMAN	0.68	12.14	3	3		1193.67	1185.19	3036.36	2452.12	4413.48	5413.85	1231.06	560.189	0.49:0.49:1.25:1.01:1.81:2.22:0.51:0.23	1966.84	2904.64	0.81:1.19	38007	Ephrin-B1 OS=Homo sapiens OX=9606 GN=EFNB1 PE=1 SV=1	P98172
1442	TRUE	O43657|TSN6_HUMAN	6.82	5.31	1	1		231.338	604.868	684.322	656.499	1074.53	1174.76	762.951	444.381	0.33:0.86:0.97:0.93:1.53:1.67:1.08:0.63	544.257	864.156	0.77:1.23	27563	Tetraspanin-6 OS=Homo sapiens OX=9606 GN=TSPAN6 PE=1 SV=1	O43657
338	TRUE	O14672|ADA10_HUMAN	3.79	12.03	7	7	Oxidation (M)	23690.4	22922	34927.5	34858.1	58453.6	64192.3	23080.5	22417.9	0.67:0.64:0.98:0.98:1.64:1.80:0.65:0.63	29099.5	42036.1	0.82:1.18	84142	Disintegrin and metalloproteinase domain-containing protein 10 OS=Homo sapiens OX=9606 GN=ADAM10 PE=1 SV=1	O14672
796	TRUE	P26012|ITB8_HUMAN	6.82	4.03	2	2		0	0	182.007	261.243	209.02	157.94	142.105	93.8016	0.00:0.00:1.39:2.00:1.60:1.21:1.09:0.72	221.625	150.717	1.19:0.81	85632	Integrin beta-8 OS=Homo sapiens OX=9606 GN=ITGB8 PE=1 SV=1	P26012
791	TRUE	Q7KYR7|BT2A1_HUMAN	11.32	2.09	1	1		115.539	131.225	78.5982	159.244	291.855	142.635	162.373	181.509	0.73:0.83:0.50:1.01:1.85:0.90:1.03:1.15	121.152	194.593	0.77:1.23	59633	Butyrophilin subfamily 2 member A1 OS=Homo sapiens OX=9606 GN=BTN2A1 PE=1 SV=3	Q7KYR7
322	TRUE	P08648|ITA5_HUMAN	2.79	18.4	13	13	Oxidation (M)	4236.86	3912.19	6801.5	10028.2	16267.4	10448.8	3893.52	4971.26	0.56:0.52:0.90:1.32:2.15:1.38:0.51:0.66	6244.69	8895.23	0.82:1.18	114536	Integrin alpha-5 OS=Homo sapiens OX=9606 GN=ITGA5 PE=1 SV=2	P08648
873	TRUE	P41440|S19A1_HUMAN	1.95	1.86	1	1		106.377	138.767	120.268	156.242	265.253	353.846	71.8593	91.0066	0.65:0.85:0.74:0.96:1.63:2.17:0.44:0.56	130.413	195.491	0.80:1.20	64868	Reduced folate transporter OS=Homo sapiens OX=9606 GN=SLC19A1 PE=1 SV=3	P41440
21	TRUE	P02751|FINC_HUMAN	24.81	35.04	76	76	Carbamidomethylation; Oxidation (M)	265953	266326	423644	417515	1390.86	4932.89	25967.3	36009.9	1.48:1.48:2.35:2.32:0.02:0.03:0.14:0.20	343359	17075.2	1.91:0.09	272320	Fibronectin OS=Homo sapiens OX=9606 GN=FN1 PE=1 SV=5	P02751
20	TRUE	P35908|K22E_HUMAN	35.27	69.64	71	49	Oxidation (M)	100097	100047	145738	143470	296994	313810	441207	431562	0.41:0.41:0.59:0.58:1.20:1.27:1.79:1.75	122338	370893	0.50:1.50	65433	Keratin, type II cytoskeletal 2 epidermal OS=Homo sapiens OX=9606 GN=KRT2 PE=1 SV=2	P35908
117	TRUE	Q8WUM4|PDC6I_HUMAN	10.46	34.79	27	27	Oxidation (M)	24073.5	24843.2	43250.1	38757.1	17164	28815.2	23107.8	19089.5	0.88:0.91:1.58:1.42:0.63:1.05:0.84:0.70	32731	22044.1	1.20:0.80	96023	Programmed cell death 6-interacting protein OS=Homo sapiens OX=9606 GN=PDCD6IP PE=1 SV=1	Q8WUM4
114	TRUE	O95714|HERC2_HUMAN	21.91	0.19	1	1		281702	257592	267550	334745	125731	216899	183232	146788	1.24:1.14:1.18:1.48:0.55:0.96:0.81:0.65	285397	168163	1.26:0.74	527228	E3 ubiquitin-protein ligase HERC2 OS=Homo sapiens OX=9606 GN=HERC2 PE=1 SV=2	O95714
185	TRUE	P22735|TGM1_HUMAN	59.56	12.85	8	8		525.955	519.126	725.76	736.873	5039.6	5377.01	6424.67	6209.57	0.16:0.16:0.23:0.23:1.58:1.68:2.01:1.94	646.937	5762.71	0.20:1.80	89787	Protein-glutamine gamma-glutamyltransferase K OS=Homo sapiens OX=9606 GN=TGM1 PE=1 SV=4	P22735
179	TRUE	Q15046|SYK_HUMAN	0.76	5.7	3	3	Oxidation (M)	612.911	535.572	883.822	917.317	659.349	538.77	721.409	898.752	0.85:0.74:1.23:1.27:0.91:0.75:1.00:1.25	737.406	704.57	1.02:0.98	68048	Lysine--tRNA ligase OS=Homo sapiens OX=9606 GN=KARS1 PE=1 SV=3	Q15046
93	TRUE	P10809|CH60_HUMAN	16.77	11.87	5	5	Oxidation (M)	831.452	827.675	1650.85	1453.89	483.549	318.125	752.753	584.95	0.96:0.96:1.91:1.68:0.56:0.37:0.87:0.68	1190.97	534.844	1.38:0.62	61055	60 kDa heat shock protein, mitochondrial OS=Homo sapiens OX=9606 GN=HSPD1 PE=1 SV=2	P10809
44	TRUE	P12814|ACTN1_HUMAN	25.9	21.86	18	14	Oxidation (M)	1961.61	2245.88	5087.96	5364.8	10849.2	11932	16739	16871.3	0.22:0.25:0.57:0.60:1.22:1.34:1.88:1.90	3665.06	14097.9	0.41:1.59	103058	Alpha-actinin-1 OS=Homo sapiens OX=9606 GN=ACTN1 PE=1 SV=2	P12814
287	TRUE	Q04917|1433F_HUMAN	25.52	30.89	7	7	Oxidation (M)	1797.54	1741.22	4741.92	4710.97	10091.2	11051	16230.3	15130.7	0.22:0.21:0.58:0.58:1.23:1.35:1.98:1.85	3247.91	13125.8	0.40:1.60	28219	14-3-3 protein eta OS=Homo sapiens OX=9606 GN=YWHAH PE=1 SV=4	Q04917
929	TRUE	Q9UHG3|PCYOX_HUMAN	90.14	1.78	1	1		0	0	0	0	140.239	127.71	170.724	120.031	0.00:0.00:0.00:0.00:2.01:1.83:2.44:1.72	0	139.676	0.00:2.00	56640	Prenylcysteine oxidase 1 OS=Homo sapiens OX=9606 GN=PCYOX1 PE=1 SV=3	Q9UHG3
262	TRUE	O00468|AGRIN_HUMAN	17.38	8.8	13	13		5093	5394.27	7365.63	7413.67	3526.94	4256.14	1411.74	2396.01	1.11:1.17:1.60:1.61:0.77:0.92:0.31:0.52	6316.64	2897.7	1.37:0.63	217320	Agrin OS=Homo sapiens OX=9606 GN=AGRN PE=1 SV=6	O00468
167	TRUE	P13010|XRCC5_HUMAN	10.27	3.01	2	2		266.355	148.9	408.488	357.777	0	103.188	166.873	184.812	1.30:0.73:2.00:1.75:0.00:0.50:0.82:0.90	333.032	194.162	1.26:0.74	82705	X-ray repair cross-complementing protein 5 OS=Homo sapiens OX=9606 GN=XRCC5 PE=1 SV=3	P13010
770	TRUE	P05121|PAI1_HUMAN	34.27	12.94	4	4	Oxidation (M)	1053.19	734.366	854.163	975.405	464.645	373.374	320.107	292.655	1.66:1.16:1.35:1.54:0.73:0.59:0.51:0.46	904.282	392.173	1.40:0.60	45060	Plasminogen activator inhibitor 1 OS=Homo sapiens OX=9606 GN=SERPINE1 PE=1 SV=1	P05121
108	TRUE	P55196|AFAD_HUMAN	21.24	0.71	1	1		0	0	60.9191	0	183.976	148.813	173.034	149.333	0.00:0.00:0.68:0.00:2.06:1.66:1.93:1.67	60.9191	163.789	0.54:1.46	206804	Afadin OS=Homo sapiens OX=9606 GN=AFDN PE=1 SV=3	P55196
39	TRUE	P08670|VIME_HUMAN	16.18	18.45	11	7	Oxidation (M)	514.655	449.151	697.199	1094.06	112.661	57.9938	334.465	307.52	1.15:1.01:1.56:2.45:0.25:0.13:0.75:0.69	688.765	279.584	1.42:0.58	53652	Vimentin OS=Homo sapiens OX=9606 GN=VIM PE=1 SV=4	P08670
753	TRUE	O75131|CPNE3_HUMAN	10.82	5.03	3	3		612.003	530.544	1274.1	1115.95	453.651	720.467	370.966	441.311	0.89:0.77:1.85:1.62:0.66:1.04:0.54:0.64	883.15	496.599	1.28:0.72	60131	Copine-3 OS=Homo sapiens OX=9606 GN=CPNE3 PE=1 SV=1	O75131
303	TRUE	O95817|BAG3_HUMAN	41.34	2.43	1	1		94.9787	90.1303	128.821	125.963	385.099	309.55	460.239	480.971	0.37:0.35:0.50:0.49:1.48:1.19:1.77:1.85	109.973	408.965	0.42:1.58	61595	BAG family molecular chaperone regulator 3 OS=Homo sapiens OX=9606 GN=BAG3 PE=1 SV=3	O95817
1083	TRUE	P09496|CLCA_HUMAN	38.97	11.69	2	2		739.052	1158.6	855.788	1069.49	389.705	317.999	325.753	286.814	1.15:1.80:1.33:1.66:0.61:0.49:0.51:0.45	955.732	360.89	1.45:0.55	27077	Clathrin light chain A OS=Homo sapiens OX=9606 GN=CLTA PE=1 SV=1	P09496
445	TRUE	Q5D862|FILA2_HUMAN	35.11	2.09	4	4		793.45	1065.25	581.81	644.48	3116.16	4609.36	6200.71	9176.65	0.24:0.33:0.18:0.20:0.95:1.41:1.89:2.80	812.547	5841.2	0.24:1.76	248073	Filaggrin-2 OS=Homo sapiens OX=9606 GN=FLG2 PE=1 SV=1	Q5D862
288	TRUE	P15311|EZRI_HUMAN	44.16	21.16	14	10	Oxidation (M)	1092.08	660.2	818.415	699.408	3361.2	2796.43	3182.5	3866.88	0.53:0.32:0.40:0.34:1.63:1.36:1.55:1.88	817.526	3301.75	0.40:1.60	69413	Ezrin OS=Homo sapiens OX=9606 GN=EZR PE=1 SV=4	P15311
383	TRUE	P15531|NDKA_HUMAN	30.82	34.87	7	7	Oxidation (M)	1389.65	902.721	841.637	964.484	2378.37	2960.11	4994.89	4204.42	0.60:0.39:0.36:0.41:1.02:1.27:2.14:1.80	1024.62	3634.45	0.44:1.56	17149	Nucleoside diphosphate kinase A OS=Homo sapiens OX=9606 GN=NME1 PE=1 SV=1	P15531
121	TRUE	P20020|AT2B1_HUMAN	12.86	10.98	20	10	Oxidation (M)	3105.59	3160.34	7339.31	7058.89	3672.67	1965.92	1969.17	2330.17	0.81:0.83:1.92:1.85:0.96:0.51:0.51:0.61	5166.03	2484.48	1.35:0.65	134685	Plasma membrane calcium-transporting ATPase 1 OS=Homo sapiens OX=9606 GN=ATP2B1 PE=1 SV=4	P20020
1176	TRUE	O75787|RENR_HUMAN	6.49	5.71	2	2		3165.38	3293.35	4583.81	4380.91	2932.23	4026.74	3185.64	2849.86	0.89:0.93:1.29:1.23:0.83:1.13:0.90:0.80	3913.8	3248.62	1.09:0.91	39008	Renin receptor OS=Homo sapiens OX=9606 GN=ATP6AP2 PE=1 SV=2	O75787
693	TRUE	P09497|CLCB_HUMAN	0.45	16.59	4	4		376.902	349.67	606.004	397.605	279.781	522.528	519.318	378.331	0.88:0.82:1.41:0.93:0.65:1.22:1.21:0.88	494.507	547.236	0.95:1.05	25190	Clathrin light chain B OS=Homo sapiens OX=9606 GN=CLTB PE=1 SV=1	P09497
18	TRUE	Q00610|CLH1_HUMAN	18.48	29.61	46	35	Carbamidomethylation; Oxidation (M)	14102.7	13243.6	27680.9	33339	7143.67	9860.8	9359.54	9201.4	0.91:0.85:1.79:2.15:0.46:0.64:0.60:0.59	22091.6	8891.35	1.43:0.57	191615	Clathrin heavy chain 1 OS=Homo sapiens OX=9606 GN=CLTC PE=1 SV=5	Q00610
595	TRUE	O00299|CLIC1_HUMAN	27.65	15.77	3	3	Oxidation (M)	1460.87	2077.74	3213.52	3404.42	6244.62	7811.28	7682.35	7264.1	0.30:0.42:0.66:0.70:1.28:1.60:1.57:1.48	2539.14	7250.59	0.52:1.48	26923	Chloride intracellular channel protein 1 OS=Homo sapiens OX=9606 GN=CLIC1 PE=1 SV=4	O00299
659	TRUE	Q01844|EWS_HUMAN	5.11	2.13	1	1		254.814	210.608	200.917	273.955	149.522	235.797	134.322	271.708	1.18:0.97:0.93:1.27:0.69:1.09:0.62:1.26	235.074	197.837	1.09:0.91	68478	RNA-binding protein EWS OS=Homo sapiens OX=9606 GN=EWSR1 PE=1 SV=1	Q01844
165	TRUE	P07996|TSP1_HUMAN	29.19	13.85	12	12	Oxidation (M)	10557.8	12329.1	32891.6	28355.9	2852.36	4126.91	2284.02	3334.92	0.87:1.02:2.72:2.35:0.24:0.34:0.19:0.28	21033.6	3149.55	1.74:0.26	129383	Thrombospondin-1 OS=Homo sapiens OX=9606 GN=THBS1 PE=1 SV=2	P07996
302	TRUE	Q01518|CAP1_HUMAN	21.48	14.53	6	6	Carbamidomethylation; Oxidation (M)	323.431	561.259	315.991	749.183	1105.23	1046.77	2518.81	2282.01	0.29:0.50:0.28:0.67:0.99:0.94:2.26:2.05	536.953	1823.9	0.45:1.55	51901	Adenylyl cyclase-associated protein 1 OS=Homo sapiens OX=9606 GN=CAP1 PE=1 SV=5	Q01518
1450	TRUE	Q7L0Q8|RHOU_HUMAN	9.33	4.65	1	1		532.935	572.636	1470.32	1418.23	298.951	64.9472	643.838	613.33	0.76:0.82:2.09:2.02:0.43:0.09:0.92:0.87	998.531	405.267	1.42:0.58	28218	Rho-related GTP-binding protein RhoU OS=Homo sapiens OX=9606 GN=RHOU PE=1 SV=1	Q7L0Q8
515	TRUE	P23528|COF1_HUMAN	22.61	46.39	6	6	Acetylation (N-term)	2064.91	2153.12	3116.86	3324.63	4373.29	6482.93	11098.8	10621.7	0.38:0.40:0.58:0.62:0.81:1.20:2.05:1.97	2664.88	8144.16	0.49:1.51	18502	Cofilin-1 OS=Homo sapiens OX=9606 GN=CFL1 PE=1 SV=3	P23528
289	TRUE	P50570|DYN2_HUMAN	9.29	2.18	1	1		117.316	130.65	294.53	301.128	52.3344	84.6401	134.286	164.574	0.73:0.82:1.84:1.88:0.33:0.53:0.84:1.03	210.906	108.959	1.32:0.68	98064	Dynamin-2 OS=Homo sapiens OX=9606 GN=DNM2 PE=1 SV=2	P50570
2	TRUE	Q09666|AHNK_HUMAN	4.6	9.1	36	36	Acetylation (N-term); Oxidation (M)	551305	559662	1208838	1.16154e+06	570628	624065	631104	762187	0.73:0.74:1.59:1.53:0.75:0.82:0.83:1.00	870337	646996	1.15:0.85	629101	Neuroblast differentiation-associated protein AHNAK OS=Homo sapiens OX=9606 GN=AHNAK PE=1 SV=2	Q09666
615	TRUE	O14763|TR10B_HUMAN	11.73	11.59	4	4	Oxidation (M)	1157.73	819.589	2308.97	2636.01	1123	850.364	591.459	325.559	0.94:0.67:1.88:2.15:0.92:0.69:0.48:0.27	1730.58	776.214	1.38:0.62	47878	Tumor necrosis factor receptor superfamily member 10B OS=Homo sapiens OX=9606 GN=TNFRSF10B PE=1 SV=2	O14763
676	TRUE	O95716|RAB3D_HUMAN	26.62	6.85	1	1		105.676	117.029	145.88	279.134	449.931	439.744	512.026	456.542	0.34:0.37:0.47:0.89:1.44:1.40:1.63:1.46	161.93	464.561	0.52:1.48	24267	Ras-related protein Rab-3D OS=Homo sapiens OX=9606 GN=RAB3D PE=1 SV=1	O95716
1173	TRUE	Q8N474|SFRP1_HUMAN	56.6	3.18	1	1		293.889	220.949	858.478	822.868	0	0	0	0	1.07:0.80:3.13:3.00:0.00:0.00:0.00:0.00	549.046	0	2.00:0.00	35386	Secreted frizzled-related protein 1 OS=Homo sapiens OX=9606 GN=SFRP1 PE=1 SV=1	Q8N474
612	TRUE	P30419|NMT1_HUMAN	4.41	2.82	1	1	Oxidation (M)	1238.72	1279.92	1752.95	1691.87	1460.49	1534.54	1150.07	1135.65	0.88:0.91:1.25:1.20:1.04:1.09:0.82:0.81	1490.87	1320.19	1.06:0.94	56806	Glycylpeptide N-tetradecanoyltransferase 1 OS=Homo sapiens OX=9606 GN=NMT1 PE=1 SV=2	P30419
353	TRUE	P18206|VINC_HUMAN	22.48	13.58	10	10	Oxidation (M)	225.587	225.816	562.784	418.099	673.026	1999.76	2464.18	2628.12	0.20:0.20:0.49:0.36:0.59:1.74:2.14:2.29	416.039	1941.27	0.35:1.65	123799	Vinculin OS=Homo sapiens OX=9606 GN=VCL PE=1 SV=4	P18206
695	TRUE	P60953|CDC42_HUMAN	24.25	31.41	6	6	Carbamidomethylation	744.897	1009.73	3685.2	3439.38	12622.7	16004.1	10836	10369.4	0.10:0.14:0.50:0.47:1.72:2.18:1.48:1.41	2308.43	12458	0.31:1.69	21259	Cell division control protein 42 homolog OS=Homo sapiens OX=9606 GN=CDC42 PE=1 SV=2	P60953
478	TRUE	Q8TD43|TRPM4_HUMAN	10.34	5.77	6	6	Oxidation (M)	810.249	789.633	2249.88	1591.98	746.968	874.902	653.311	620.776	0.78:0.76:2.16:1.53:0.72:0.84:0.63:0.60	1360.44	723.989	1.31:0.69	134301	Transient receptor potential cation channel subfamily M member 4 OS=Homo sapiens OX=9606 GN=TRPM4 PE=1 SV=1	Q8TD43
100	TRUE	Q13835|PKP1_HUMAN	20.47	10.58	6	6	Oxidation (M)	403.942	294.959	797.229	662.627	1015.68	1580.89	3502.71	3150.06	0.28:0.21:0.56:0.46:0.71:1.11:2.46:2.21	539.689	2312.33	0.38:1.62	82861	Plakophilin-1 OS=Homo sapiens OX=9606 GN=PKP1 PE=1 SV=2	Q13835
1006	TRUE	P48595|SPB10_HUMAN	4.38	6.55	3	3	Acetylation (N-term)	4270.5	4820.95	6461.06	7389.94	4147.7	6285.43	10030.4	9846.15	0.64:0.72:0.97:1.11:0.62:0.94:1.51:1.48	5735.61	7577.41	0.86:1.14	45403	Serpin B10 OS=Homo sapiens OX=9606 GN=SERPINB10 PE=1 SV=1	P48595
581	TRUE	Q15286|RAB35_HUMAN	19.67	11.94	3	2	Oxidation (M)	990.509	656.249	2899.49	2871.04	6037.41	6710.51	6003.36	5605.64	0.25:0.17:0.73:0.72:1.52:1.69:1.51:1.41	1854.32	6089.23	0.47:1.53	23025	Ras-related protein Rab-35 OS=Homo sapiens OX=9606 GN=RAB35 PE=1 SV=1	Q15286
754	TRUE	P07093|GDN_HUMAN	17.57	11.56	4	4		310.65	360.958	785.028	1130.25	279.796	159.388	57.7105	54.912	0.79:0.92:2.00:2.88:0.71:0.41:0.15:0.14	646.72	137.952	1.65:0.35	44002	Glia-derived nexin OS=Homo sapiens OX=9606 GN=SERPINE2 PE=1 SV=1	P07093
1312	TRUE	P0CG04|IGLC1_HUMAN	20.44	14.15	1	1		396.513	227.752	181.69	681.336	831.902	1191.66	2961.84	3000.48	0.33:0.19:0.15:0.58:0.70:1.01:2.50:2.53	371.823	1996.47	0.31:1.69	11348	Immunoglobulin lambda constant 1 OS=Homo sapiens OX=9606 GN=IGLC1 PE=1 SV=1	P0CG04
1312	TRUE	P0DOY3|IGLC3_HUMAN	20.44	14.15	1	1		396.513	227.752	181.69	681.336	831.902	1191.66	2961.84	3000.48	0.33:0.19:0.15:0.58:0.70:1.01:2.50:2.53	371.823	1996.47	0.31:1.69	11266	Immunoglobulin lambda constant 3 OS=Homo sapiens OX=9606 GN=IGLC3 PE=1 SV=1	P0DOY3
1312	TRUE	P0DOY2|IGLC2_HUMAN	20.44	14.15	1	1		396.513	227.752	181.69	681.336	831.902	1191.66	2961.84	3000.48	0.33:0.19:0.15:0.58:0.70:1.01:2.50:2.53	371.823	1996.47	0.31:1.69	11294	Immunoglobulin lambda constant 2 OS=Homo sapiens OX=9606 GN=IGLC2 PE=1 SV=1	P0DOY2
1312	TRUE	A0M8Q6|IGLC7_HUMAN	20.44	14.15	1	1		396.513	227.752	181.69	681.336	831.902	1191.66	2961.84	3000.48	0.33:0.19:0.15:0.58:0.70:1.01:2.50:2.53	371.823	1996.47	0.31:1.69	11254	Immunoglobulin lambda constant 7 OS=Homo sapiens OX=9606 GN=IGLC7 PE=1 SV=3	A0M8Q6
1312	TRUE	P0CF74|IGLC6_HUMAN	20.44	14.15	1	1		396.513	227.752	181.69	681.336	831.902	1191.66	2961.84	3000.48	0.33:0.19:0.15:0.58:0.70:1.01:2.50:2.53	371.823	1996.47	0.31:1.69	11277	Immunoglobulin lambda constant 6 OS=Homo sapiens OX=9606 GN=IGLC6 PE=1 SV=1	P0CF74
1312	TRUE	B9A064|IGLL5_HUMAN	20.44	7.01	1	1		396.513	227.752	181.69	681.336	831.902	1191.66	2961.84	3000.48	0.33:0.19:0.15:0.58:0.70:1.01:2.50:2.53	371.823	1996.47	0.31:1.69	23063	Immunoglobulin lambda-like polypeptide 5 OS=Homo sapiens OX=9606 GN=IGLL5 PE=2 SV=2	B9A064
1312	TRUE	P0DOX8|IGL1_HUMAN	20.44	6.94	1	1		396.513	227.752	181.69	681.336	831.902	1191.66	2961.84	3000.48	0.33:0.19:0.15:0.58:0.70:1.01:2.50:2.53	371.823	1996.47	0.31:1.69	22830	Immunoglobulin lambda-1 light chain OS=Homo sapiens OX=9606 PE=1 SV=1	P0DOX8
46	TRUE	P53396|ACLY_HUMAN	5.46	16.17	13	13	Oxidation (M)	1008.92	1134.16	2086.43	2734.82	1579.64	1154.73	1089.29	958.633	0.69:0.77:1.42:1.86:1.08:0.79:0.74:0.65	1741.08	1195.57	1.19:0.81	120839	ATP-citrate synthase OS=Homo sapiens OX=9606 GN=ACLY PE=1 SV=3	P53396
786	TRUE	Q9Y3L5|RAP2C_HUMAN	8.28	6.56	3	1	Oxidation (M)	1458.48	1369.69	1068.48	1122.39	1389.99	483.135	1063.67	278.122	1.42:1.33:1.04:1.09:1.35:0.47:1.03:0.27	1254.76	803.73	1.22:0.78	20745	Ras-related protein Rap-2c OS=Homo sapiens OX=9606 GN=RAP2C PE=1 SV=1	Q9Y3L5
829	TRUE	P51636|CAV2_HUMAN	12.59	26.54	2	2	Oxidation (M)	2756.61	2506.06	1828.05	1751.92	1580.48	1906.78	737.452	753.119	1.60:1.45:1.06:1.01:0.91:1.10:0.43:0.44	2210.66	1244.46	1.28:0.72	18291	Caveolin-2 OS=Homo sapiens OX=9606 GN=CAV2 PE=1 SV=2	P51636
480	TRUE	Q9H6S3|ES8L2_HUMAN	22.6	1.82	1	1		0	0	94.8663	81.2655	153.39	182.071	161.479	219.944	0.00:0.00:0.85:0.73:1.37:1.63:1.45:1.97	88.0659	179.221	0.66:1.34	80621	Epidermal growth factor receptor kinase substrate 8-like protein 2 OS=Homo sapiens OX=9606 GN=EPS8L2 PE=1 SV=2	Q9H6S3
4	TRUE	O75369|FLNB_HUMAN	2.81	14.45	30	28	Oxidation (M)	1705.88	1485.97	4367.78	3322.55	1099.89	1239.95	2970.94	3216.82	0.70:0.61:1.80:1.37:0.45:0.51:1.22:1.33	2720.55	2131.9	1.12:0.88	278164	Filamin-B OS=Homo sapiens OX=9606 GN=FLNB PE=1 SV=2	O75369
295	TRUE	P61106|RAB14_HUMAN	16.75	39.53	7	7	Oxidation (M)	908.631	831.805	2226.91	1922.34	2257.12	3083.26	5116.45	4298.82	0.35:0.32:0.86:0.74:0.87:1.19:1.98:1.67	1472.42	3688.91	0.57:1.43	23897	Ras-related protein Rab-14 OS=Homo sapiens OX=9606 GN=RAB14 PE=1 SV=4	P61106
122	TRUE	P52597|HNRPF_HUMAN	4.66	10.6	3	3		1233.4	1050.73	3135.96	3089.74	756.498	771.51	1846.11	2187.55	0.70:0.60:1.78:1.76:0.43:0.44:1.05:1.24	2187.01	1445.02	1.20:0.80	45672	Heterogeneous nuclear ribonucleoprotein F OS=Homo sapiens OX=9606 GN=HNRNPF PE=1 SV=3	P52597
15	TRUE	P49327|FAS_HUMAN	1.23	12.58	23	23	Oxidation (M)	2338.41	2517.31	5528.56	4360.61	2123.73	4798.85	3113.01	3147.72	0.67:0.72:1.58:1.25:0.61:1.37:0.89:0.90	3686.22	3295.83	1.06:0.94	273427	Fatty acid synthase OS=Homo sapiens OX=9606 GN=FASN PE=1 SV=3	P49327
1406	TRUE	Q9BRF8|CPPED_HUMAN	50.09	3.5	1	1	Acetylation (N-term)	0	0	0	0	57.9769	75.703	264.576	80.7811	0.00:0.00:0.00:0.00:0.97:1.26:4.42:1.35	0	119.759	0.00:2.00	35548	Serine/threonine-protein phosphatase CPPED1 OS=Homo sapiens OX=9606 GN=CPPED1 PE=1 SV=3	Q9BRF8
539	TRUE	P20073|ANXA7_HUMAN	0.49	9.63	4	4		1160.22	751.382	990.811	1023.61	741.246	1247.43	1080.49	813.032	1.19:0.77:1.02:1.05:0.76:1.28:1.11:0.83	981.507	970.549	1.01:0.99	52739	Annexin A7 OS=Homo sapiens OX=9606 GN=ANXA7 PE=1 SV=3	P20073
259	TRUE	P63244|RACK1_HUMAN	0.39	16.4	4	4	Oxidation (M)	1131	694.458	1746.4	1525.72	772.234	778.522	1930.71	2104.42	0.85:0.52:1.31:1.14:0.58:0.58:1.45:1.58	1274.39	1396.47	0.95:1.05	35077	Receptor of activated protein C kinase 1 OS=Homo sapiens OX=9606 GN=RACK1 PE=1 SV=3	P63244
267	TRUE	P09211|GSTP1_HUMAN	26.16	49.52	8	8	Oxidation (M)	7300.24	6764.2	2795.01	3095.39	14206.3	16001.5	19194.3	21121.6	0.65:0.60:0.25:0.27:1.26:1.41:1.70:1.87	4988.71	17630.9	0.44:1.56	23356	Glutathione S-transferase P OS=Homo sapiens OX=9606 GN=GSTP1 PE=1 SV=2	P09211
483	TRUE	O00560|SDCB1_HUMAN	6.97	52.01	8	8	Carbamidomethylation; Oxidation (M)	8109.12	7948.47	12318.2	12108.1	9328.95	11837.5	3450.14	3402.43	0.95:0.93:1.44:1.41:1.09:1.38:0.40:0.40	10121	7004.75	1.18:0.82	32444	Syntenin-1 OS=Homo sapiens OX=9606 GN=SDCBP PE=1 SV=1	O00560
1013	TRUE	P49755|TMEDA_HUMAN	17.06	9.59	2	2		226.881	198.345	392.818	421.066	523.177	511.302	1315.81	1205.8	0.38:0.33:0.66:0.70:0.87:0.85:2.20:2.01	355.221	972.263	0.54:1.46	24976	Transmembrane emp24 domain-containing protein 10 OS=Homo sapiens OX=9606 GN=TMED10 PE=1 SV=2	P49755
169	TRUE	Q08431|MFGM_HUMAN	31.86	54.01	21	21	Oxidation (M)	7878.05	8192.63	22141.3	22662.3	177730	182663	90049.7	97606.4	0.10:0.11:0.29:0.30:2.34:2.40:1.18:1.28	15218.6	137012	0.20:1.80	43105	Lactadherin OS=Homo sapiens OX=9606 GN=MFGE8 PE=1 SV=3	Q08431
54	TRUE	P08238|HS90B_HUMAN	2.5	16.71	22	11	Oxidation (M)	5540.18	5802.42	14176	15701.2	6304.74	9467	8111.03	7207.86	0.61:0.64:1.57:1.74:0.70:1.05:0.90:0.80	10497.8	7840.09	1.14:0.86	83264	Heat shock protein HSP 90-beta OS=Homo sapiens OX=9606 GN=HSP90AB1 PE=1 SV=4	P08238
737	TRUE	P11277|SPTB1_HUMAN	2.99	0.42	1	1		24551.4	24227.5	19136.7	25289	21641.3	29562.4	23962.4	24381.7	1.02:1.01:0.79:1.05:0.90:1.23:0.99:1.01	23301.2	24887	0.97:1.03	246468	Spectrin beta chain, erythrocytic OS=Homo sapiens OX=9606 GN=SPTB PE=1 SV=5	P11277
1383	TRUE	P51178|PLCD1_HUMAN	64.05	1.32	1	1		0	0	0	0	0	150.599	283.948	231.35	0.00:0.00:0.00:0.00:0.00:1.81:3.41:2.78	0	221.966	0.00:2.00	85665	1-phosphatidylinositol 4,5-bisphosphate phosphodiesterase delta-1 OS=Homo sapiens OX=9606 GN=PLCD1 PE=1 SV=2	P51178
418	TRUE	P35241|RADI_HUMAN	20.79	4.46	6	2	Oxidation (M)	67.082	123.716	261	217.719	636.446	520.018	372.265	696.445	0.19:0.34:0.72:0.60:1.76:1.44:1.03:1.92	186.646	556.294	0.50:1.50	68564	Radixin OS=Homo sapiens OX=9606 GN=RDX PE=1 SV=1	P35241
58	TRUE	P11142|HSP7C_HUMAN	17.8	32.04	25	16	Oxidation (M)	6234.29	5876.96	9406.48	9787.8	11225.8	13739.4	27735.9	27506.9	0.45:0.42:0.67:0.70:0.81:0.99:1.99:1.97	7826.38	20052	0.56:1.44	70898	Heat shock cognate 71 kDa protein OS=Homo sapiens OX=9606 GN=HSPA8 PE=1 SV=1	P11142
1007	TRUE	P54920|SNAA_HUMAN	15.98	10.51	2	2		80.8732	142.408	276.377	288.432	381.921	365.715	529.046	777.974	0.23:0.40:0.78:0.81:1.07:1.03:1.49:2.19	220.622	513.664	0.60:1.40	33233	Alpha-soluble NSF attachment protein OS=Homo sapiens OX=9606 GN=NAPA PE=1 SV=3	P54920
947	TRUE	P11234|RALB_HUMAN	19.8	6.8	1	1		472.242	803.813	2070.83	2006.6	4700.06	5924.98	3720.89	3870.83	0.16:0.27:0.70:0.68:1.60:2.01:1.26:1.31	1338.37	4554.19	0.45:1.55	23409	Ras-related protein Ral-B OS=Homo sapiens OX=9606 GN=RALB PE=1 SV=1	P11234
352	TRUE	P09543|CN37_HUMAN	30.36	19.95	7	7	Oxidation (M)	594.675	625.8	1170.01	1137.33	3096.25	4453.56	2664.42	2723.36	0.29:0.30:0.57:0.55:1.50:2.16:1.29:1.32	881.956	3234.4	0.43:1.57	47579	2',3'-cyclic-nucleotide 3'-phosphodiesterase OS=Homo sapiens OX=9606 GN=CNP PE=1 SV=2	P09543
892	TRUE	Q92896|GSLG1_HUMAN	0.92	0.85	1	1	Oxidation (M)	62.7242	156.996	181.085	230.534	65.278	115.672	231.5	158.588	0.42:1.04:1.20:1.53:0.43:0.77:1.54:1.06	157.835	142.759	1.05:0.95	134552	Golgi apparatus protein 1 OS=Homo sapiens OX=9606 GN=GLG1 PE=1 SV=2	Q92896
153	TRUE	P98160|PGBM_HUMAN	9.92	5.4	18	18	Oxidation (M)	1189.78	1070.43	4784.87	4630.13	992.828	976.045	1219.5	955.94	0.60:0.54:2.42:2.34:0.50:0.49:0.62:0.48	2918.8	1036.08	1.48:0.52	468830	Basement membrane-specific heparan sulfate proteoglycan core protein OS=Homo sapiens OX=9606 GN=HSPG2 PE=1 SV=4	P98160
230	TRUE	P30153|2AAA_HUMAN	24.24	13.41	6	6		301.354	396.73	591.923	386.822	728.233	764.067	1042.2	963.461	0.47:0.61:0.92:0.60:1.13:1.18:1.61:1.49	419.207	874.491	0.65:1.35	65309	Serine/threonine-protein phosphatase 2A 65 kDa regulatory subunit A alpha isoform OS=Homo sapiens OX=9606 GN=PPP2R1A PE=1 SV=4	P30153
38	TRUE	P14923|PLAK_HUMAN	23.21	30.2	22	17	Oxidation (M)	3439.27	4647.47	6176.38	6173.91	18370	20615.6	109159	100171	0.10:0.14:0.18:0.18:0.55:0.61:3.25:2.98	5109.26	62079.1	0.15:1.85	81745	Junction plakoglobin OS=Homo sapiens OX=9606 GN=JUP PE=1 SV=3	P14923
764	TRUE	Q15691|MARE1_HUMAN	10.95	2.99	1	1		66.278	0	157.813	128.442	243.924	135.859	847.16	658.562	0.24:0.00:0.56:0.46:0.87:0.49:3.03:2.35	117.511	471.376	0.40:1.60	29999	Microtubule-associated protein RP/EB family member 1 OS=Homo sapiens OX=9606 GN=MAPRE1 PE=1 SV=3	Q15691
872	TRUE	O43865|SAHH2_HUMAN	0.67	2.26	1	1		159.97	185.657	220.638	276.709	188.071	71.4605	248.511	406.911	0.73:0.84:1.00:1.26:0.86:0.33:1.13:1.85	210.743	228.738	0.96:1.04	58951	S-adenosylhomocysteine hydrolase-like protein 1 OS=Homo sapiens OX=9606 GN=AHCYL1 PE=1 SV=2	O43865
689	TRUE	Q96BM9|ARL8A_HUMAN	15.92	8.06	1	1		99.0531	86.1716	189.443	155.376	331.666	157.355	577.894	567.343	0.37:0.32:0.70:0.57:1.23:0.58:2.14:2.10	132.511	408.565	0.49:1.51	21416	ADP-ribosylation factor-like protein 8A OS=Homo sapiens OX=9606 GN=ARL8A PE=1 SV=1	Q96BM9
110	TRUE	P23396|RS3_HUMAN	1.62	34.98	6	6	Oxidation (M)	2442.06	2556.55	5875.01	5575.9	2978.31	4037.65	5545.7	4872.55	0.58:0.60:1.39:1.32:0.70:0.95:1.31:1.15	4112.38	4358.55	0.97:1.03	26688	40S ribosomal protein S3 OS=Homo sapiens OX=9606 GN=RPS3 PE=1 SV=2	P23396
1218	TRUE	Q9H254|SPTN4_HUMAN	17.93	0.43	1	1		211.851	225.022	203.809	142.03	545.634	287.107	1616.29	1303.69	0.37:0.40:0.36:0.25:0.96:0.51:2.85:2.30	195.678	938.18	0.35:1.65	288985	Spectrin beta chain, non-erythrocytic 4 OS=Homo sapiens OX=9606 GN=SPTBN4 PE=1 SV=2	Q9H254
147	TRUE	Q9Y446|PKP3_HUMAN	15.85	18.32	10	10		306.14	262.552	1109.6	755.681	1105.04	1395.05	5874.72	5204.06	0.15:0.13:0.55:0.38:0.55:0.70:2.94:2.60	608.493	3394.72	0.30:1.70	87082	Plakophilin-3 OS=Homo sapiens OX=9606 GN=PKP3 PE=1 SV=1	Q9Y446
245	TRUE	P04083|ANXA1_HUMAN	18.42	54.05	15	15	Oxidation (M)	1282.88	1914.15	4768.01	5333.36	8660.94	10799.6	59959.7	56912	0.07:0.10:0.25:0.29:0.46:0.58:3.21:3.04	3324.6	34083	0.18:1.82	38714	Annexin A1 OS=Homo sapiens OX=9606 GN=ANXA1 PE=1 SV=2	P04083
1030	TRUE	Q01628|IFM3_HUMAN	29.18	30.83	2	2	Oxidation (M)	373.86	246.946	1046.07	1052.34	10589.1	22554.2	8463.98	4496.47	0.06:0.04:0.17:0.17:1.74:3.70:1.39:0.74	733.968	11526	0.12:1.88	14632	Interferon-induced transmembrane protein 3 OS=Homo sapiens OX=9606 GN=IFITM3 PE=1 SV=2	Q01628
270	TRUE	P26038|MOES_HUMAN	27.07	20.1	13	9	Oxidation (M)	830.21	662.54	1115.36	1202.34	1736.4	2540.27	2053.79	2349.44	0.53:0.42:0.71:0.77:1.11:1.63:1.32:1.50	952.612	2169.98	0.61:1.39	67820	Moesin OS=Homo sapiens OX=9606 GN=MSN PE=1 SV=3	P26038
468	TRUE	Q99816|TS101_HUMAN	4.36	22.31	7	7	Oxidation (M)	3471.67	3461.2	3369.37	4755.33	4116.87	5105.78	1061.25	2068.54	1.01:1.01:0.98:1.39:1.20:1.49:0.31:0.60	3764.39	3088.11	1.10:0.90	43944	Tumor susceptibility gene 101 protein OS=Homo sapiens OX=9606 GN=TSG101 PE=1 SV=2	Q99816
743	TRUE	P0DOX5|IGG1_HUMAN	17.99	21.6	6	5	Acetylation (N-term); Carbamidomethylation	3280.37	2938.85	3502.95	3512.49	6007.97	6595.75	24982.9	25252.8	0.34:0.31:0.37:0.37:0.63:0.69:2.63:2.66	3308.67	15709.9	0.35:1.65	49329	Immunoglobulin gamma-1 heavy chain OS=Homo sapiens OX=9606 PE=1 SV=2	P0DOX5
1551	TRUE	Q96A54|PAQR1_HUMAN	5.57	3.2	1	1		88.844	71.118	372.148	266.433	103.725	132.03	64.8731	89.5817	0.60:0.48:2.50:1.79:0.70:0.89:0.44:0.60	199.636	97.5524	1.34:0.66	42616	Adiponectin receptor protein 1 OS=Homo sapiens OX=9606 GN=ADIPOR1 PE=1 SV=1	Q96A54
997	TRUE	Q99653|CHP1_HUMAN	1.33	5.64	1	1		61.7644	65.9459	98.4453	160.099	75.1409	95.6276	89.8097	143.388	0.63:0.67:1.00:1.62:0.76:0.97:0.91:1.45	96.5636	100.992	0.98:1.02	22456	Calcineurin B homologous protein 1 OS=Homo sapiens OX=9606 GN=CHP1 PE=1 SV=3	Q99653
416	TRUE	Q16181|SEPT7_HUMAN	2	2.75	1	1		126.334	149.587	298.247	237.339	179.922	146.645	423.534	221.507	0.57:0.67:1.34:1.06:0.81:0.66:1.90:0.99	202.876	242.902	0.91:1.09	50680	Septin-7 OS=Homo sapiens OX=9606 GN=SEPTIN7 PE=1 SV=2	Q16181
1025	TRUE	P00918|CAH2_HUMAN	7.05	5	1	1		737.876	55.0191	392.664	467.161	55.1695	0	111.999	159.724	2.98:0.22:1.59:1.89:0.22:0.00:0.45:0.65	413.18	108.964	1.58:0.42	29246	Carbonic anhydrase 2 OS=Homo sapiens OX=9606 GN=CA2 PE=1 SV=2	P00918
565	TRUE	Q9Y4F1|FARP1_HUMAN	30.54	3.83	3	3		202.352	156.487	227.905	191.049	1082.75	1493.9	539.594	647.917	0.36:0.28:0.40:0.34:1.91:2.63:0.95:1.14	263.568	941.04	0.44:1.56	118633	FERM, ARHGEF and pleckstrin domain-containing protein 1 OS=Homo sapiens OX=9606 GN=FARP1 PE=1 SV=1	Q9Y4F1
77	TRUE	O43795|MYO1B_HUMAN	25.64	14.26	13	12	Oxidation (M)	1023.56	1012.11	2197.19	1889.24	9651.31	10771.9	4468.55	4410.31	0.23:0.23:0.50:0.43:2.18:2.43:1.01:1.00	1530.52	7325.53	0.35:1.65	131985	Unconventional myosin-Ib OS=Homo sapiens OX=9606 GN=MYO1B PE=1 SV=3	O43795
265	TRUE	P07476|INVO_HUMAN	17.75	24.1	11	11		110.673	82.8595	332.776	206.998	440.823	622.997	4580.33	3824.66	0.09:0.06:0.26:0.16:0.35:0.49:3.59:3.00	311.539	3051.1	0.19:1.81	68479	Involucrin OS=Homo sapiens OX=9606 GN=IVL PE=1 SV=2	P07476
440	TRUE	P51149|RAB7A_HUMAN	15.15	44.93	8	8	Oxidation (M)	1526.66	1547.59	6134.8	5992.22	8714.83	9532.95	9811.05	9311.23	0.23:0.24:0.93:0.91:1.33:1.45:1.49:1.42	3800.32	9342.51	0.58:1.42	23490	Ras-related protein Rab-7a OS=Homo sapiens OX=9606 GN=RAB7A PE=1 SV=1	P51149
346	TRUE	Q03135|CAV1_HUMAN	4.52	31.46	4	4		7042.19	8971.31	32445.6	33054.8	11992.3	19137.3	6922.6	5905.03	0.45:0.57:2.07:2.11:0.76:1.22:0.44:0.38	20378.5	10989.3	1.30:0.70	20472	Caveolin-1 OS=Homo sapiens OX=9606 GN=CAV1 PE=1 SV=4	Q03135
390	TRUE	Q14344|GNA13_HUMAN	27.5	19.1	7	6		879.551	513.691	576.505	987.795	3428.22	4559.32	2166.5	1886.77	0.47:0.27:0.31:0.53:1.83:2.43:1.16:1.01	739.385	3010.2	0.39:1.61	44050	Guanine nucleotide-binding protein subunit alpha-13 OS=Homo sapiens OX=9606 GN=GNA13 PE=1 SV=2	Q14344
106	TRUE	Q92817|EVPL_HUMAN	37.76	6.49	10	10		0	0	0	0	121.722	170.09	1753.32	2172.08	0.00:0.00:0.00:0.00:0.23:0.32:3.33:4.12	0	1122.11	0.00:2.00	231604	Envoplakin OS=Homo sapiens OX=9606 GN=EVPL PE=1 SV=3	Q92817
234	TRUE	Q9UQB8|BAIP2_HUMAN	25.23	13.41	6	6	Oxidation (M)	389.227	364.301	752.335	697.055	1782.48	2662.96	1345.22	1366	0.33:0.31:0.64:0.60:1.52:2.28:1.15:1.17	550.73	1789.16	0.47:1.53	60868	Brain-specific angiogenesis inhibitor 1-associated protein 2 OS=Homo sapiens OX=9606 GN=BAIAP2 PE=1 SV=1	Q9UQB8
636	TRUE	O15144|ARPC2_HUMAN	22.4	7.67	2	2	Oxidation (M)	462.88	400.478	275.647	476.199	627.184	829.411	1300.34	1122.34	0.67:0.58:0.40:0.69:0.91:1.21:1.89:1.63	403.801	969.819	0.59:1.41	34333	Actin-related protein 2/3 complex subunit 2 OS=Homo sapiens OX=9606 GN=ARPC2 PE=1 SV=1	O15144
128	TRUE	P04792|HSPB1_HUMAN	19.78	65.85	14	14	Oxidation (M)	957.354	896.906	1386.98	1596.71	4352.57	5396.01	56820	54538.8	0.06:0.06:0.09:0.10:0.28:0.34:3.61:3.46	1291.17	31574.4	0.08:1.92	22783	Heat shock protein beta-1 OS=Homo sapiens OX=9606 GN=HSPB1 PE=1 SV=2	P04792
61	TRUE	P0DMV8|HS71A_HUMAN	16.64	15.91	21	10	Oxidation (M)	756.47	693.159	1617.76	1085.23	2198.07	2825.92	22156.2	20698.2	0.12:0.11:0.25:0.17:0.34:0.43:3.41:3.18	1038.15	11969.6	0.16:1.84	70052	Heat shock 70 kDa protein 1A OS=Homo sapiens OX=9606 GN=HSPA1A PE=1 SV=1	P0DMV8
61	TRUE	P0DMV9|HS71B_HUMAN	16.64	15.91	21	10	Oxidation (M)	756.47	693.159	1617.76	1085.23	2198.07	2825.92	22156.2	20698.2	0.12:0.11:0.25:0.17:0.34:0.43:3.41:3.18	1038.15	11969.6	0.16:1.84	70052	Heat shock 70 kDa protein 1B OS=Homo sapiens OX=9606 GN=HSPA1B PE=1 SV=1	P0DMV9
337	TRUE	P06396|GELS_HUMAN	15.02	18.93	10	10	Carbamidomethylation; Oxidation (M)	1160.29	1105.01	1720.15	1459.51	1817.37	2653.18	9290.63	9199.89	0.33:0.31:0.48:0.41:0.51:0.75:2.62:2.59	1361.24	5740.27	0.38:1.62	85698	Gelsolin OS=Homo sapiens OX=9606 GN=GSN PE=1 SV=1	P06396
718	TRUE	Q8IZP0|ABI1_HUMAN	8.01	3.15	1	1		0	0	222.325	296.352	368.533	864.535	485.456	311.268	0.00:0.00:0.70:0.93:1.16:2.71:1.52:0.98	259.338	507.448	0.68:1.32	55081	Abl interactor 1 OS=Homo sapiens OX=9606 GN=ABI1 PE=1 SV=4	Q8IZP0
451	TRUE	Q07864|DPOE1_HUMAN	0.42	0.52	1	1	Acetylation (N-term); Oxidation (M)	10946.8	10836.8	7616.99	7427.09	10911.8	9546	8047.16	8515.4	1.19:1.17:0.83:0.80:1.18:1.03:0.87:0.92	9206.91	9255.08	1.00:1.00	261518	DNA polymerase epsilon catalytic subunit A OS=Homo sapiens OX=9606 GN=POLE PE=1 SV=5	Q07864
590	TRUE	Q14624|ITIH4_HUMAN	8.49	9.68	7	7	Oxidation (M)	25356.7	24656.9	44585.1	44189.1	39829.8	48676	45736.2	44219.2	0.64:0.62:1.12:1.11:1.00:1.23:1.15:1.12	34696.9	44615.3	0.87:1.13	103357	Inter-alpha-trypsin inhibitor heavy chain H4 OS=Homo sapiens OX=9606 GN=ITIH4 PE=1 SV=4	Q14624
586	TRUE	Q9UJU6|DBNL_HUMAN	2.41	2.56	1	1		286.491	239.252	88.0222	61.9498	0	66.0499	131.371	129.862	2.29:1.91:0.70:0.49:0.00:0.53:1.05:1.04	168.929	109.094	1.22:0.78	48207	Drebrin-like protein OS=Homo sapiens OX=9606 GN=DBNL PE=1 SV=1	Q9UJU6
266	TRUE	Q15582|BGH3_HUMAN	2.99	19.03	9	9	Oxidation (M)	1246.98	1901.31	6286.76	7497.93	2808.42	2451.29	2235.2	2026.04	0.38:0.57:1.90:2.27:0.85:0.74:0.68:0.61	4233.24	2380.24	1.28:0.72	74681	Transforming growth factor-beta-induced protein ig-h3 OS=Homo sapiens OX=9606 GN=TGFBI PE=1 SV=1	Q15582
406	TRUE	P61204|ARF3_HUMAN	22.13	31.49	6	4	Oxidation (M)	1788.37	1997.38	4193.62	3854.24	7930.91	8655.92	6436.08	6237.12	0.35:0.39:0.82:0.75:1.54:1.69:1.25:1.21	2958.4	7315.01	0.58:1.42	20601	ADP-ribosylation factor 3 OS=Homo sapiens OX=9606 GN=ARF3 PE=1 SV=2	P61204
406	TRUE	P84077|ARF1_HUMAN	22.13	31.49	6	4	Oxidation (M)	1788.37	1997.38	4193.62	3854.24	7930.91	8655.92	6436.08	6237.12	0.35:0.39:0.82:0.75:1.54:1.69:1.25:1.21	2958.4	7315.01	0.58:1.42	20697	ADP-ribosylation factor 1 OS=Homo sapiens OX=9606 GN=ARF1 PE=1 SV=2	P84077
864	TRUE	O14745|NHRF1_HUMAN	25.17	10.89	3	3		312.926	214.649	428.242	427.778	1529.27	2310.67	878.188	904.787	0.36:0.25:0.49:0.49:1.75:2.64:1.00:1.03	366.818	1405.73	0.41:1.59	38868	Na(+)/H(+) exchange regulatory cofactor NHE-RF1 OS=Homo sapiens OX=9606 GN=SLC9A3R1 PE=1 SV=4	O14745
1121	TRUE	P08758|ANXA5_HUMAN	14.64	5	1	1		77.0236	87.2189	89.4621	157.88	154.486	184.721	910.828	743.821	0.26:0.29:0.30:0.53:0.51:0.61:3.03:2.47	102.896	498.464	0.34:1.66	35937	Annexin A5 OS=Homo sapiens OX=9606 GN=ANXA5 PE=1 SV=2	P08758
794	TRUE	P63000|RAC1_HUMAN	21.5	7.81	3	2	Oxidation (M)	446.474	529.474	1188.49	1042.14	4290.88	5069.16	1878.66	2017.97	0.22:0.26:0.58:0.51:2.09:2.46:0.91:0.98	801.644	3314.16	0.39:1.61	21450	Ras-related C3 botulinum toxin substrate 1 OS=Homo sapiens OX=9606 GN=RAC1 PE=1 SV=1	P63000
863	TRUE	Q15517|CDSN_HUMAN	16.62	7.94	2	2	Oxidation (M)	493.428	493.13	73.1267	1507.17	2076.58	2528.71	34826.7	34220.9	0.05:0.05:0.02:0.16:0.22:0.27:3.66:3.59	681.949	18413.2	0.07:1.93	51522	Corneodesmosin OS=Homo sapiens OX=9606 GN=CDSN PE=1 SV=3	Q15517
176	TRUE	O94832|MYO1D_HUMAN	27.95	4.17	3	3		155.242	220.892	160.194	313.379	694.493	634.496	514.411	462.806	0.39:0.56:0.41:0.79:1.76:1.61:1.30:1.17	310.915	576.551	0.70:1.30	116202	Unconventional myosin-Id OS=Homo sapiens OX=9606 GN=MYO1D PE=1 SV=2	O94832
1245	TRUE	Q92743|HTRA1_HUMAN	8.62	2.08	1	1		0	0	73.4484	67.0241	93.6542	106.357	152.818	78.1294	0.00:0.00:1.03:0.94:1.31:1.49:2.14:1.09	70.2362	107.74	0.79:1.21	51287	Serine protease HTRA1 OS=Homo sapiens OX=9606 GN=HTRA1 PE=1 SV=1	Q92743
808	TRUE	P63098|CANB1_HUMAN	2.17	14.12	2	2		293.624	215.479	534.837	572.152	475.362	511.426	159.39	223.265	0.79:0.58:1.43:1.53:1.27:1.37:0.43:0.60	404.023	342.361	1.08:0.92	19300	Calcineurin subunit B type 1 OS=Homo sapiens OX=9606 GN=PPP3R1 PE=1 SV=2	P63098
86	TRUE	P06733|ENOA_HUMAN	15.64	54.84	18	18	Oxidation (M)	4498.37	4597.4	8928.45	7658.9	10745.9	15223.8	101042	57243.5	0.17:0.18:0.34:0.29:0.41:0.58:3.85:2.18	6420.78	46063.8	0.24:1.76	47169	Alpha-enolase OS=Homo sapiens OX=9606 GN=ENO1 PE=1 SV=2	P06733
627	TRUE	P27797|CALR_HUMAN	3.52	7.91	3	3		0	0	206.657	118.09	85.6846	170.47	1153.04	978.094	0.00:0.00:0.61:0.35:0.25:0.50:3.40:2.89	210.601	819.586	0.41:1.59	48142	Calreticulin OS=Homo sapiens OX=9606 GN=CALR PE=1 SV=1	P27797
818	TRUE	P61225|RAP2B_HUMAN	16.5	22.95	5	3		1493.15	1345.4	5121.03	5140.12	14617.8	15437.1	7265.76	6557.68	0.21:0.19:0.72:0.72:2.05:2.17:1.02:0.92	3274.92	10969.6	0.46:1.54	20504	Ras-related protein Rap-2b OS=Homo sapiens OX=9606 GN=RAP2B PE=1 SV=1	P61225
635	TRUE	P13928|ANXA8_HUMAN	13.31	25.08	6	6	Oxidation (M)	405.101	446.852	438.884	754.286	872.648	675.697	4293.83	4403.83	0.26:0.29:0.29:0.49:0.57:0.44:2.79:2.87	527.16	2561.5	0.34:1.66	36881	Annexin A8 OS=Homo sapiens OX=9606 GN=ANXA8 PE=1 SV=3	P13928
76	TRUE	P14625|ENPL_HUMAN	1.34	9.22	7	6		395.368	321.906	989.752	1005.47	591.995	748.394	658.916	667.892	0.59:0.48:1.47:1.50:0.88:1.11:0.98:0.99	678.123	666.799	1.01:0.99	92469	Endoplasmin OS=Homo sapiens OX=9606 GN=HSP90B1 PE=1 SV=1	P14625
607	TRUE	Q8N5I2|ARRD1_HUMAN	3.21	31.64	8	8		15925.1	16550.4	14656.6	12235.8	17912.6	21937.7	6193.31	7267.22	1.13:1.18:1.04:0.87:1.27:1.56:0.44:0.52	14842	13327.7	1.05:0.95	45981	Arrestin domain-containing protein 1 OS=Homo sapiens OX=9606 GN=ARRDC1 PE=1 SV=1	Q8N5I2
591	TRUE	Q01469|FABP5_HUMAN	15.66	30.37	4	4	Acetylation (N-term); Carbamidomethylation	277.25	254.085	358.68	358.758	845.613	1015.16	22362.3	23210	0.05:0.04:0.06:0.06:0.14:0.17:3.67:3.81	312.193	13886.3	0.04:1.96	15164	Fatty acid-binding protein 5 OS=Homo sapiens OX=9606 GN=FABP5 PE=1 SV=3	Q01469
260	TRUE	P02787|TRFE_HUMAN	3.52	23.64	15	15	Oxidation (M)	12639.1	12151.4	23749.7	23709	23346.7	22182.8	19756.5	16433	0.66:0.63:1.23:1.23:1.21:1.15:1.03:0.85	18062.3	20429.8	0.94:1.06	77064	Serotransferrin OS=Homo sapiens OX=9606 GN=TF PE=1 SV=3	P02787
761	TRUE	Q12846|STX4_HUMAN	1.06	24.24	6	6		1076.58	697.758	3303.7	3571.32	1710.84	1892.87	1248.63	1352.56	0.58:0.38:1.78:1.92:0.92:1.02:0.67:0.73	2162.34	1551.22	1.16:0.84	34180	Syntaxin-4 OS=Homo sapiens OX=9606 GN=STX4 PE=1 SV=2	Q12846
712	TRUE	P13929|ENOB_HUMAN	1.72	3.23	1	1	Oxidation (M)	190.594	251.278	565.098	301.239	181.793	379.159	517.678	404.64	0.55:0.72:1.62:0.86:0.52:1.09:1.48:1.16	327.053	370.818	0.94:1.06	46987	Beta-enolase OS=Homo sapiens OX=9606 GN=ENO3 PE=1 SV=5	P13929
373	TRUE	Q96QA5|GSDMA_HUMAN	13	36.18	11	11	Oxidation (M)	273.89	296.869	418.868	300.309	469.11	579.069	5296.57	5141.11	0.17:0.19:0.26:0.19:0.29:0.36:3.32:3.22	322.484	3417.78	0.17:1.83	49365	Gasdermin-A OS=Homo sapiens OX=9606 GN=GSDMA PE=1 SV=4	Q96QA5
26	TRUE	O60437|PEPL_HUMAN	12.74	13.67	21	21		179.365	259.033	333.914	368.257	473.694	427.575	4780.42	4257.45	0.13:0.19:0.24:0.27:0.34:0.31:3.45:3.07	335.083	2484.79	0.24:1.76	204747	Periplakin OS=Homo sapiens OX=9606 GN=PPL PE=1 SV=4	O60437
1346	TRUE	P15104|GLNA_HUMAN	5.27	5.36	1	1		141.811	2239.48	503.254	2319.92	112.942	108.966	724.073	785.469	0.16:2.58:0.58:2.68:0.13:0.13:0.84:0.91	1301.11	432.863	1.50:0.50	42064	Glutamine synthetase OS=Homo sapiens OX=9606 GN=GLUL PE=1 SV=4	P15104
188	TRUE	Q9H223|EHD4_HUMAN	21.87	26.8	15	12	Oxidation (M)	2732.59	2393.13	2345.97	6364.77	12514.7	11101.6	7640.64	7569.76	0.42:0.36:0.36:0.97:1.90:1.69:1.16:1.15	3459.12	9706.66	0.53:1.47	61175	EH domain-containing protein 4 OS=Homo sapiens OX=9606 GN=EHD4 PE=1 SV=1	Q9H223
8	TRUE	P13647|K2C5_HUMAN	12.74	50.51	64	47	Acetylation (N-term); Carbamidomethylation; Oxidation (M)	15303.4	15310	25556.7	22338.9	31406.2	35454.3	529416	506303	0.10:0.10:0.17:0.15:0.21:0.24:3.59:3.43	19627.2	275645	0.13:1.87	62378	Keratin, type II cytoskeletal 5 OS=Homo sapiens OX=9606 GN=KRT5 PE=1 SV=3	P13647
208	TRUE	P14735|IDE_HUMAN	21.33	20.31	18	18	Oxidation (M)	100.196	100.368	125.255	168.009	7866.73	274.541	3560.16	3620.94	0.05:0.05:0.06:0.08:3.98:0.14:1.80:1.83	123.457	4485.45	0.05:1.95	117968	Insulin-degrading enzyme OS=Homo sapiens OX=9606 GN=IDE PE=1 SV=4	P14735
118	TRUE	P54652|HSP72_HUMAN	12.76	16.43	18	8	Oxidation (M)	368.517	351.42	550.207	363.029	608.782	703.895	7068.13	7600.67	0.17:0.16:0.25:0.16:0.28:0.32:3.21:3.45	408.293	3995.37	0.19:1.81	70021	Heat shock-related 70 kDa protein 2 OS=Homo sapiens OX=9606 GN=HSPA2 PE=1 SV=1	P54652
466	TRUE	P46459|NSF_HUMAN	7.05	1.48	1	1		0	57.6017	102.404	89.1198	85.7011	82.5075	440.257	406.866	0.00:0.36:0.65:0.56:0.54:0.52:2.79:2.57	83.0418	253.833	0.49:1.51	82594	Vesicle-fusing ATPase OS=Homo sapiens OX=9606 GN=NSF PE=1 SV=3	P46459
516	TRUE	P01040|CYTA_HUMAN	12.93	75.51	7	7		3035.1	3029.6	1963.75	2544.19	4610.01	5731.45	138584	134398	0.08:0.08:0.05:0.07:0.13:0.16:3.77:3.66	2643.16	70831	0.07:1.93	11006	Cystatin-A OS=Homo sapiens OX=9606 GN=CSTA PE=1 SV=1	P01040
472	TRUE	P61224|RAP1B_HUMAN	20.49	14.13	8	2	Carbamidomethylation; Oxidation (M)	539.821	738.588	937.612	857.357	5040.54	5941.97	1607.26	1731.1	0.25:0.34:0.43:0.39:2.32:2.73:0.74:0.80	768.345	3580.22	0.35:1.65	20825	Ras-related protein Rap-1b OS=Homo sapiens OX=9606 GN=RAP1B PE=1 SV=1	P61224
199	TRUE	Q9H4M9|EHD1_HUMAN	20.62	21.91	13	8	Oxidation (M)	1222.18	994.674	1868.23	1520.23	5387.73	5802.25	4124.39	1977.29	0.43:0.35:0.65:0.53:1.88:2.03:1.44:0.69	1401.33	4322.91	0.49:1.51	60627	EH domain-containing protein 1 OS=Homo sapiens OX=9606 GN=EHD1 PE=1 SV=2	Q9H4M9
159	TRUE	P20930|FILA_HUMAN	12.97	2.91	11	11	Oxidation (M)	687.778	751.945	917.986	900.053	1506.2	1758.03	45687.8	50448	0.05:0.06:0.07:0.07:0.12:0.14:3.56:3.93	884.905	25059	0.07:1.93	435170	Filaggrin OS=Homo sapiens OX=9606 GN=FLG PE=1 SV=3	P20930
34	TRUE	P13645|K1C10_HUMAN	70.14	59.42	53	50	Acetylation (N-term); Carbamidomethylation; Oxidation (M)	105372	110023	110586	112964	224321	248177	235294	231806	0.61:0.64:0.64:0.66:1.30:1.44:1.37:1.35	109736	234900	0.64:1.36	58827	Keratin, type I cytoskeletal 10 OS=Homo sapiens OX=9606 GN=KRT10 PE=1 SV=6	P13645
420	TRUE	P06744|G6PI_HUMAN	12.76	10.22	4	4		589.849	362.6	667.253	668.55	895.893	686.211	3348.39	3132	0.46:0.28:0.52:0.52:0.69:0.53:2.59:2.42	629.579	2015.63	0.48:1.52	63147	Glucose-6-phosphate isomerase OS=Homo sapiens OX=9606 GN=GPI PE=1 SV=4	P06744
220	TRUE	Q08188|TGM3_HUMAN	11.42	28.14	16	16	Oxidation (M)	474.841	413.169	836.299	665.35	996.978	796.123	21653.3	19413.8	0.08:0.07:0.15:0.12:0.18:0.14:3.83:3.43	597.415	12201.7	0.09:1.91	76632	Protein-glutamine gamma-glutamyltransferase E OS=Homo sapiens OX=9606 GN=TGM3 PE=1 SV=4	Q08188
95	TRUE	P04406|G3P_HUMAN	12.08	42.09	13	13	Carbamidomethylation; Oxidation (M)	10287.2	10255.2	12637.1	8334.77	12579.7	16968.9	119344	109868	0.27:0.27:0.34:0.22:0.34:0.45:3.18:2.93	10378.6	64690.1	0.28:1.72	36053	Glyceraldehyde-3-phosphate dehydrogenase OS=Homo sapiens OX=9606 GN=GAPDH PE=1 SV=3	P04406
5	TRUE	P04264|K2C1_HUMAN	13.18	69.1	118	102	Acetylation (N-term); Carbamidomethylation; Oxidation (M)	237771	243086	269257	266985	327274	382770	1.62447e+06	1.61659e+06	0.38:0.39:0.43:0.43:0.53:0.62:2.62:2.60	254275	987776	0.41:1.59	66039	Keratin, type II cytoskeletal 1 OS=Homo sapiens OX=9606 GN=KRT1 PE=1 SV=6	P04264
136	TRUE	Q86YZ3|HORN_HUMAN	11.05	6.42	12	12	Oxidation (M)	197.119	108.006	259.838	248.319	293.499	377.637	34237.1	32697.2	0.02:0.02:0.03:0.03:0.03:0.04:4.00:3.82	249.492	20450.2	0.02:1.98	282390	Hornerin OS=Homo sapiens OX=9606 GN=HRNR PE=1 SV=2	Q86YZ3
1352	TRUE	P42336|PK3CA_HUMAN	141.35	0.75	1	1	Acetylation (N-term)	0	0	0	0	0	0	876.602	872.99	0.00:0.00:0.00:0.00:0.00:0.00:4.01:3.99	0	874.796	0.00:2.00	124284	Phosphatidylinositol 4,5-bisphosphate 3-kinase catalytic subunit alpha isoform OS=Homo sapiens OX=9606 GN=PIK3CA PE=1 SV=2	P42336
284	TRUE	Q8TD16|BICD2_HUMAN	22.56	1.21	1	1		37997.2	37249.1	0	0	0	0	157.779	65.1707	4.03:3.95:0.00:0.00:0.00:0.00:0.02:0.02	37623.1	111.475	1.99:0.02	93533	Protein bicaudal D homolog 2 OS=Homo sapiens OX=9606 GN=BICD2 PE=1 SV=1	Q8TD16
3	TRUE	P15924|DESP_HUMAN	10.15	43.33	135	135	Carbamidomethylation; Oxidation (M)	2533.09	1830.11	2603.16	2648.34	2539.73	3977.84	186425	186963	0.05:0.04:0.05:0.05:0.05:0.08:3.83:3.84	2403.67	95844.3	0.05:1.95	331774	Desmoplakin OS=Homo sapiens OX=9606 GN=DSP PE=1 SV=3	P15924
1310	TRUE	A0A0J9YX35|HV64D_HUMAN	11.2	16.24	1	1		0	59.305	68.456	66.9202	83.6656	97.643	129.529	273.984	0.00:0.61:0.70:0.69:0.86:1.00:1.33:2.81	64.8938	146.205	0.61:1.39	12823	Immunoglobulin heavy variable 3-64D OS=Homo sapiens OX=9606 GN=IGHV3-64D PE=3 SV=1	A0A0J9
1310	TRUE	P01763|HV348_HUMAN	11.2	16.24	1	1		0	59.305	68.456	66.9202	83.6656	97.643	129.529	273.984	0.00:0.61:0.70:0.69:0.86:1.00:1.33:2.81	64.8938	146.205	0.61:1.39	12813	Immunoglobulin heavy variable 3-48 OS=Homo sapiens OX=9606 GN=IGHV3-48 PE=1 SV=2	P01763
1310	TRUE	P01780|HV307_HUMAN	11.2	16.24	1	1		0	59.305	68.456	66.9202	83.6656	97.643	129.529	273.984	0.00:0.61:0.70:0.69:0.86:1.00:1.33:2.81	64.8938	146.205	0.61:1.39	12943	Immunoglobulin heavy variable 3-7 OS=Homo sapiens OX=9606 GN=IGHV3-7 PE=1 SV=2	P01780
1310	TRUE	P01766|HV313_HUMAN	11.2	16.38	1	1		0	59.305	68.456	66.9202	83.6656	97.643	129.529	273.984	0.00:0.61:0.70:0.69:0.86:1.00:1.33:2.81	64.8938	146.205	0.61:1.39	12506	Immunoglobulin heavy variable 3-13 OS=Homo sapiens OX=9606 GN=IGHV3-13 PE=1 SV=2	P01766
1310	TRUE	P01764|HV323_HUMAN	11.2	16.24	1	1		0	59.305	68.456	66.9202	83.6656	97.643	129.529	273.984	0.00:0.61:0.70:0.69:0.86:1.00:1.33:2.81	64.8938	146.205	0.61:1.39	12582	Immunoglobulin heavy variable 3-23 OS=Homo sapiens OX=9606 GN=IGHV3-23 PE=1 SV=2	P01764
37	TRUE	P08727|K1C19_HUMAN	9.49	25	18	15	Oxidation (M)	3003.99	2903.73	4400.65	5287.01	3368.36	6200.16	426255	392749	0.03:0.03:0.04:0.05:0.03:0.06:4.04:3.72	3898.84	207143	0.04:1.96	44106	Keratin, type I cytoskeletal 19 OS=Homo sapiens OX=9606 GN=KRT19 PE=1 SV=4	P08727
450	TRUE	P25311|ZA2G_HUMAN	10.67	28.86	6	6	Oxidation (M)	1047.8	1089.21	1254.07	1296	1507.01	1583.99	30928.8	29398.2	0.12:0.13:0.15:0.15:0.18:0.19:3.63:3.45	1171.77	15854.5	0.14:1.86	34259	Zinc-alpha-2-glycoprotein OS=Homo sapiens OX=9606 GN=AZGP1 PE=1 SV=2	P25311
1184	TRUE	P18510|IL1RA_HUMAN	63.85	10.73	1	1		0	0	0	0	0	0	109.703	86.1158	0.00:0.00:0.00:0.00:0.00:0.00:4.48:3.52	0	97.9093	0.00:2.00	20055	Interleukin-1 receptor antagonist protein OS=Homo sapiens OX=9606 GN=IL1RN PE=1 SV=1	P18510
849	TRUE	P62879|GBB2_HUMAN	5.4	5.59	4	1	Carbamidomethylation	1055.35	1036.92	72.0078	71.8564	110.102	136.562	91.6709	110.155	3.14:3.09:0.21:0.21:0.33:0.41:0.27:0.33	559.034	112.122	1.67:0.33	37331	Guanine nucleotide-binding protein G(I)/G(S)/G(T) subunit beta-2 OS=Homo sapiens OX=9606 GN=GNB2 PE=1 SV=3	P62879
482	TRUE	P51572|BAP31_HUMAN	65.72	4.47	1	1		0	0	0	0	0	0	618.151	458.777	0.00:0.00:0.00:0.00:0.00:0.00:4.59:3.41	0	538.464	0.00:2.00	27992	B-cell receptor-associated protein 31 OS=Homo sapiens OX=9606 GN=BCAP31 PE=1 SV=3	P51572
1024	TRUE	Q8IW75|SPA12_HUMAN	63.62	9.66	3	3		0	0	0	0	0	0	354.225	260.73	0.00:0.00:0.00:0.00:0.00:0.00:4.61:3.39	0	307.477	0.00:2.00	47175	Serpin A12 OS=Homo sapiens OX=9606 GN=SERPINA12 PE=1 SV=1	Q8IW75
697	TRUE	P63167|DYL1_HUMAN	10.67	12.36	1	1		341.386	207.271	1217.07	1435.91	915.826	1199.34	4610.47	5854.56	0.17:0.11:0.62:0.73:0.46:0.61:2.34:2.97	800.409	3145.05	0.41:1.59	10366	Dynein light chain 1, cytoplasmic OS=Homo sapiens OX=9606 GN=DYNLL1 PE=1 SV=1	P63167
379	TRUE	Q96FQ6|S10AG_HUMAN	20.78	64.08	8	8	Oxidation (M)	8739.6	8634.42	16477.4	16652.2	43543.4	57428.5	25949.8	24044.6	0.35:0.34:0.65:0.66:1.73:2.28:1.03:0.95	12625.9	37741.6	0.50:1.50	11801	Protein S100-A16 OS=Homo sapiens OX=9606 GN=S100A16 PE=1 SV=1	Q96FQ6
374	TRUE	P05109|S10A8_HUMAN	6.67	51.61	10	10	Carbamidomethylation; Oxidation (M)	1830.09	1737.4	1562.51	3043.9	1202.02	1104.01	284862	258896	0.03:0.03:0.02:0.04:0.02:0.02:4.11:3.74	2043.48	136516	0.03:1.97	10835	Protein S100-A8 OS=Homo sapiens OX=9606 GN=S100A8 PE=1 SV=1	P05109
328	TRUE	P17931|LEG3_HUMAN	10.26	19.6	4	4		1477.73	975.965	1858.79	2051.72	1369.15	2787.25	22213	18914.5	0.23:0.15:0.29:0.32:0.21:0.43:3.44:2.93	1591.05	11321	0.25:1.75	26152	Galectin-3 OS=Homo sapiens OX=9606 GN=LGALS3 PE=1 SV=5	P17931
6	TRUE	P58107|EPIPL_HUMAN	10.23	12.36	54	44	Oxidation (M)	741.313	737.002	860.332	700.375	741.527	1180.69	14734.4	14629.1	0.17:0.17:0.20:0.16:0.17:0.28:3.43:3.41	817.15	7821.42	0.19:1.81	555658	Epiplakin OS=Homo sapiens OX=9606 GN=EPPK1 PE=1 SV=3	P58107
831	TRUE	P09525|ANXA4_HUMAN	10.62	17.24	4	4	Oxidation (M)	200.63	233.704	570.43	572.568	409.908	572.749	3246.98	2741.05	0.19:0.22:0.53:0.54:0.38:0.54:3.04:2.57	487.582	1742.67	0.44:1.56	35883	Annexin A4 OS=Homo sapiens OX=9606 GN=ANXA4 PE=1 SV=4	P09525
120	TRUE	P06702|S10A9_HUMAN	3.92	91.23	26	26	Acetylation (N-term); Oxidation (M)	11738.6	12755.3	10006.1	10188.3	1413.63	5136.19	1.03664e+06	1.01999e+06	0.04:0.05:0.04:0.04:0.02:0.02:3.93:3.87	11172.1	515795	0.04:1.96	13242	Protein S100-A9 OS=Homo sapiens OX=9606 GN=S100A9 PE=1 SV=1	P06702
23	TRUE	P05787|K2C8_HUMAN	10.2	15.11	18	7	Acetylation (N-term); Oxidation (M)	286.487	304.396	454.125	570.155	397.63	576.777	5027.43	4824.88	0.18:0.20:0.29:0.37:0.26:0.37:3.23:3.10	425.697	2985.8	0.25:1.75	53704	Keratin, type II cytoskeletal 8 OS=Homo sapiens OX=9606 GN=KRT8 PE=1 SV=7	P05787
142	TRUE	P07237|PDIA1_HUMAN	10.51	25.59	11	11	Oxidation (M)	374.545	411.026	725.283	729.728	615.827	738.444	5445.67	5352.51	0.21:0.23:0.40:0.41:0.34:0.41:3.03:2.98	676.779	4009.53	0.29:1.71	57116	Protein disulfide-isomerase OS=Homo sapiens OX=9606 GN=P4HB PE=1 SV=3	P07237
365	TRUE	Q9BZQ8|NIBA1_HUMAN	16.83	1.51	1	1		93.5597	140.099	158.964	149.594	731.281	897.891	180.54	332.334	0.28:0.42:0.47:0.45:2.18:2.68:0.54:0.99	135.554	535.511	0.40:1.60	103135	Protein Niban 1 OS=Homo sapiens OX=9606 GN=NIBAN1 PE=1 SV=1	Q9BZQ8
251	TRUE	P07384|CAN1_HUMAN	13.13	8.4	5	5	Oxidation (M)	529.592	621.592	674.794	1003.13	797.567	1112.32	2695.65	2825.36	0.41:0.48:0.53:0.78:0.62:0.87:2.10:2.20	707.278	1857.72	0.55:1.45	81890	Calpain-1 catalytic subunit OS=Homo sapiens OX=9606 GN=CAPN1 PE=1 SV=1	P07384
1480	TRUE	P0DP57|SLUR2_HUMAN	8.14	13.4	1	1		136.537	194.118	194.586	147.106	138.851	164.276	5410.25	5823.63	0.09:0.13:0.13:0.10:0.09:0.11:3.54:3.82	168.087	2884.25	0.11:1.89	10160	Secreted Ly-6/uPAR domain-containing protein 2 OS=Homo sapiens OX=9606 GN=SLURP2 PE=1 SV=1	P0DP57
173	TRUE	O75146|HIP1R_HUMAN	54.07	1.5	1	1		0	0	0	0	0	0	95.4032	148.8	0.00:0.00:0.00:0.00:0.00:0.00:3.13:4.87	0	122.102	0.00:2.00	119388	Huntingtin-interacting protein 1-related protein OS=Homo sapiens OX=9606 GN=HIP1R PE=1 SV=2	O75146
7	TRUE	P35579|MYH9_HUMAN	9.68	21.58	35	33	Oxidation (M)	1203.44	996.925	860.486	1421.92	1094.42	1458.39	16976.6	16710.2	0.24:0.20:0.17:0.28:0.22:0.29:3.34:3.28	1120.69	9059.9	0.22:1.78	226532	Myosin-9 OS=Homo sapiens OX=9606 GN=MYH9 PE=1 SV=4	P35579
146	TRUE	Q96RT1|ERBIN_HUMAN	52.54	0.85	1	1		0	0	0	0	82.2274	53.693	0	0	0.00:0.00:0.00:0.00:4.84:3.16:0.00:0.00	0	67.9601	0.00:2.00	158298	Erbin OS=Homo sapiens OX=9606 GN=ERBIN PE=1 SV=2	Q96RT1
27	TRUE	O75691|UTP20_HUMAN	7.03	0.39	1	1		212.518	231.276	539.174	417.838	238.718	262.117	8967.78	9041.33	0.09:0.09:0.22:0.17:0.10:0.11:3.60:3.63	350.201	4627.49	0.14:1.86	318385	Small subunit processome component 20 homolog OS=Homo sapiens OX=9606 GN=UTP20 PE=1 SV=3	O75691
681	TRUE	P62491|RB11A_HUMAN	18.74	14.81	3	3	Acetylation (N-term)	1936.46	565.396	1262.33	1645.65	2734.57	3486.34	3453.43	3304.23	0.84:0.25:0.55:0.72:1.19:1.52:1.50:1.44	1352.46	3244.64	0.59:1.41	24394	Ras-related protein Rab-11A OS=Homo sapiens OX=9606 GN=RAB11A PE=1 SV=3	P62491
155	TRUE	Q07065|CKAP4_HUMAN	55.13	17.61	8	8		0	0	0	0	0	0	626.538	1129.23	0.00:0.00:0.00:0.00:0.00:0.00:2.85:5.15	0	877.885	0.00:2.00	66022	Cytoskeleton-associated protein 4 OS=Homo sapiens OX=9606 GN=CKAP4 PE=1 SV=2	Q07065
243	TRUE	Q9UJZ1|STML2_HUMAN	0.92	7.3	2	2		267.954	151.239	841.847	261.433	230.945	272.829	298.875	326.501	0.81:0.46:2.54:0.79:0.70:0.82:0.90:0.99	380.618	282.288	1.15:0.85	38534	Stomatin-like protein 2, mitochondrial OS=Homo sapiens OX=9606 GN=STOML2 PE=1 SV=1	Q9UJZ1
275	TRUE	O14936|CSKP_HUMAN	16.61	7.67	5	5		108.781	155.159	313.645	251.46	777.045	1098.33	375.065	362.726	0.25:0.36:0.73:0.58:1.81:2.55:0.87:0.84	265.468	704.956	0.55:1.45	105123	Peripheral plasma membrane protein CASK OS=Homo sapiens OX=9606 GN=CASK PE=1 SV=3	O14936
13	TRUE	P21333|FLNA_HUMAN	0.71	12.35	25	23	Oxidation (M)	894.423	2438.02	1969.87	1281.28	730.868	1605.36	2402.8	2612.67	0.51:1.40:1.13:0.74:0.42:0.92:1.38:1.50	1645.9	1837.92	0.94:1.06	280739	Filamin-A OS=Homo sapiens OX=9606 GN=FLNA PE=1 SV=4	P21333
674	TRUE	Q96P63|SPB12_HUMAN	9.56	26.91	6	6	Oxidation (M)	1528.17	1512.53	1402.93	1301.99	1455.69	1698.61	14826.6	14469.9	0.32:0.32:0.29:0.27:0.30:0.36:3.11:3.03	1436.41	8388.77	0.29:1.71	46276	Serpin B12 OS=Homo sapiens OX=9606 GN=SERPINB12 PE=1 SV=1	Q96P63
1233	TRUE	Q92747|ARC1A_HUMAN	17.31	4.59	1	1		96.8852	112.725	100.518	96.0698	135.146	171.961	277.788	414.418	0.55:0.64:0.57:0.55:0.77:0.98:1.58:2.36	101.549	249.828	0.58:1.42	41569	Actin-related protein 2/3 complex subunit 1A OS=Homo sapiens OX=9606 GN=ARPC1A PE=1 SV=2	Q92747
72	TRUE	P11021|BIP_HUMAN	7.41	34.25	20	17	Oxidation (M)	1187.18	1025.8	1171.12	571.719	491.063	1514.34	13612	12878	0.29:0.25:0.29:0.14:0.12:0.37:3.36:3.17	988.953	7123.86	0.24:1.76	72333	Endoplasmic reticulum chaperone BiP OS=Homo sapiens OX=9606 GN=HSPA5 PE=1 SV=2	P11021
533	TRUE	P21796|VDAC1_HUMAN	22.99	3.89	1	1		109.069	109.563	189.108	139.573	342.316	473.082	218.14	310.284	0.46:0.46:0.80:0.59:1.45:2.00:0.92:1.31	136.828	335.955	0.58:1.42	30773	Voltage-dependent anion-selective channel protein 1 OS=Homo sapiens OX=9606 GN=VDAC1 PE=1 SV=2	P21796
709	TRUE	P09493|TPM1_HUMAN	7.7	12.32	5	5	Oxidation (M)	657.655	539.351	604.715	663.978	879.755	365.184	6555.81	5860.44	0.33:0.27:0.30:0.33:0.44:0.18:3.25:2.91	616.425	4832.95	0.23:1.77	32709	Tropomyosin alpha-1 chain OS=Homo sapiens OX=9606 GN=TPM1 PE=1 SV=2	P09493
1147	TRUE	Q13515|BFSP2_HUMAN	9.33	2.65	1	1	Oxidation (M)	2643.57	2582.41	4305.86	4262.17	3415.6	3933.29	28110.2	26238.7	0.28:0.27:0.46:0.45:0.36:0.42:2.98:2.78	3448.5	15424.4	0.37:1.63	45880	Phakinin OS=Homo sapiens OX=9606 GN=BFSP2 PE=1 SV=1	Q13515
465	TRUE	P04040|CATA_HUMAN	9.18	16.13	6	6		632.315	880.18	1334.35	1230.3	727.443	1773.62	6536.08	5312.69	0.27:0.38:0.58:0.53:0.32:0.77:2.84:2.31	1049.09	3587.46	0.45:1.55	59756	Catalase OS=Homo sapiens OX=9606 GN=CAT PE=1 SV=3	P04040
1332	TRUE	P61077|UB2D3_HUMAN	13.08	7.48	1	1		125.168	106.543	86.0862	0	219.912	116.025	336.693	295.788	0.78:0.66:0.54:0.00:1.37:0.72:2.09:1.84	105.932	242.105	0.61:1.39	16687	Ubiquitin-conjugating enzyme E2 D3 OS=Homo sapiens OX=9606 GN=UBE2D3 PE=1 SV=1	P61077
1435	TRUE	Q8NHG7|SVIP_HUMAN	15.08	14.29	1	1		0	74.2001	152.572	134.386	176.937	202.715	223.834	247.034	0.00:0.49:1.01:0.89:1.17:1.34:1.48:1.63	120.386	212.63	0.72:1.28	8443	Small VCP/p97-interacting protein OS=Homo sapiens OX=9606 GN=SVIP PE=1 SV=1	Q8NHG7
33	TRUE	P46940|IQGA1_HUMAN	12.48	13.82	17	16	Oxidation (M)	1340.4	667.265	1561.77	1085.44	1361.18	1712.69	4387.4	4276.41	0.65:0.33:0.76:0.53:0.66:0.84:2.14:2.09	1163.72	2934.42	0.57:1.43	189252	Ras GTPase-activating-like protein IQGAP1 OS=Homo sapiens OX=9606 GN=IQGAP1 PE=1 SV=1	P46940
1056	TRUE	P01834|IGKC_HUMAN	6.59	31.78	2	2		679.652	506.015	268.311	875.277	574.748	311.246	7531.54	7102.84	0.30:0.23:0.12:0.39:0.26:0.14:3.38:3.18	582.314	3880.09	0.26:1.74	11765	Immunoglobulin kappa constant OS=Homo sapiens OX=9606 GN=IGKC PE=1 SV=2	P01834
1056	TRUE	P0DOX7|IGK_HUMAN	6.59	15.89	2	2		679.652	506.015	268.311	875.277	574.748	311.246	7531.54	7102.84	0.30:0.23:0.12:0.39:0.26:0.14:3.38:3.18	582.314	3880.09	0.26:1.74	23379	Immunoglobulin kappa light chain OS=Homo sapiens OX=9606 PE=1 SV=1	P0DOX7
90	TRUE	Q15075|EEA1_HUMAN	14.46	1.49	2	2		0	0	0	62.7441	0	0	318.509	392.01	0.00:0.00:0.00:0.65:0.00:0.00:3.30:4.06	62.7441	355.259	0.30:1.70	162466	Early endosome antigen 1 OS=Homo sapiens OX=9606 GN=EEA1 PE=1 SV=2	Q15075
641	TRUE	Q9H4G0|E41L1_HUMAN	2.78	2.27	2	2		37194.7	36813.8	14717.4	11962.5	41042.2	10866.3	13580.2	12655.5	1.66:1.65:0.66:0.54:1.84:0.49:0.61:0.57	25172.1	19536	1.13:0.87	98503	Band 4.1-like protein 1 OS=Homo sapiens OX=9606 GN=EPB41L1 PE=1 SV=2	Q9H4G0
916	TRUE	Q9HCL2|GPAT1_HUMAN	0.99	1.45	1	1	Carbamidomethylation	15800.3	19266	8048.28	10180.3	19316.9	15312.1	7577.09	7977.54	1.22:1.49:0.62:0.79:1.49:1.18:0.59:0.62	13323.7	12545.9	1.03:0.97	93795	Glycerol-3-phosphate acyltransferase 1, mitochondrial OS=Homo sapiens OX=9606 GN=GPAM PE=1 SV=3	Q9HCL2
375	TRUE	P31939|PUR9_HUMAN	7.98	7.43	3	3		6673.32	578.037	1336.37	1837.51	738.724	410.98	1040.82	892.078	3.95:0.34:0.79:1.09:0.44:0.24:0.62:0.53	2606.31	770.651	1.54:0.46	64616	Bifunctional purine biosynthesis protein ATIC OS=Homo sapiens OX=9606 GN=ATIC PE=1 SV=3	P31939
623	TRUE	Q9H9H4|VP37B_HUMAN	2.16	20	4	4	Oxidation (M)	2689.11	3272.17	3213.33	3198.57	4302.14	4977.52	1302.17	1525.98	0.88:1.07:1.05:1.05:1.41:1.63:0.43:0.50	3093.3	3026.95	1.01:0.99	31307	Vacuolar protein sorting-associated protein 37B OS=Homo sapiens OX=9606 GN=VPS37B PE=1 SV=1	Q9H9H4
683	TRUE	P0DP23|CALM1_HUMAN	5.12	32.21	5	5	Oxidation (M)	935.112	311.783	855.957	848.725	666.01	265.902	8621.23	8832.37	0.35:0.12:0.32:0.32:0.25:0.10:3.23:3.31	737.894	4596.38	0.28:1.72	16838	Calmodulin-1 OS=Homo sapiens OX=9606 GN=CALM1 PE=1 SV=1	P0DP23
683	TRUE	P0DP24|CALM2_HUMAN	5.12	32.21	5	5	Oxidation (M)	935.112	311.783	855.957	848.725	666.01	265.902	8621.23	8832.37	0.35:0.12:0.32:0.32:0.25:0.10:3.23:3.31	737.894	4596.38	0.28:1.72	16838	Calmodulin-2 OS=Homo sapiens OX=9606 GN=CALM2 PE=1 SV=1	P0DP24
683	TRUE	P0DP25|CALM3_HUMAN	5.12	32.21	5	5	Oxidation (M)	935.112	311.783	855.957	848.725	666.01	265.902	8621.23	8832.37	0.35:0.12:0.32:0.32:0.25:0.10:3.23:3.31	737.894	4596.38	0.28:1.72	16838	Calmodulin-3 OS=Homo sapiens OX=9606 GN=CALM3 PE=1 SV=1	P0DP25
698	TRUE	P29992|GNA11_HUMAN	2.14	3.62	2	1		0	0	304.236	168.93	449.338	550.631	142.262	226.905	0.00:0.00:1.32:0.73:1.95:2.39:0.62:0.99	236.583	342.284	0.82:1.18	42123	Guanine nucleotide-binding protein subunit alpha-11 OS=Homo sapiens OX=9606 GN=GNA11 PE=1 SV=2	P29992
957	TRUE	Q9H444|CHM4B_HUMAN	32.38	6.25	1	1		87.7019	72.603	77.8693	91.8888	188.572	240.892	172.669	142.826	0.65:0.54:0.58:0.68:1.40:1.79:1.28:1.06	82.5157	186.24	0.61:1.39	24950	Charged multivesicular body protein 4b OS=Homo sapiens OX=9606 GN=CHMP4B PE=1 SV=1	Q9H444
1126	TRUE	P49006|MRP_HUMAN	10.54	7.69	1	1		341.938	95.724	275.481	421.281	1478.98	1756.11	307.139	416.627	0.54:0.15:0.43:0.66:2.32:2.76:0.48:0.65	283.606	989.715	0.45:1.55	19529	MARCKS-related protein OS=Homo sapiens OX=9606 GN=MARCKSL1 PE=1 SV=2	P49006
65	TRUE	Q9UMD9|COHA1_HUMAN	12.27	2.47	4	4	Oxidation (M)	286.029	169.422	686.344	544.823	1813.57	1869.98	15578.3	491.168	0.11:0.06:0.26:0.20:0.68:0.70:5.81:0.18	517.305	4938.25	0.19:1.81	150419	Collagen alpha-1(XVII) chain OS=Homo sapiens OX=9606 GN=COL17A1 PE=1 SV=3	Q9UMD9
728	TRUE	Q9UK41|VPS28_HUMAN	1.17	16.74	3	3	Oxidation (M)	5905.9	6468.77	5908.61	5987.17	8475.76	9904.27	2997.02	3693.68	0.96:1.05:0.96:0.97:1.37:1.61:0.49:0.60	6067.61	6267.68	0.98:1.02	25425	Vacuolar protein sorting-associated protein 28 homolog OS=Homo sapiens OX=9606 GN=VPS28 PE=1 SV=1	Q9UK41
1267	TRUE	Q9H1C7|CYTM1_HUMAN	14.35	11.34	2	2		592.774	85.9466	123.628	405.073	774.814	1925.27	749.489	636.656	0.90:0.13:0.19:0.61:1.17:2.91:1.13:0.96	301.855	1021.56	0.46:1.54	10631	Cysteine-rich and transmembrane domain-containing protein 1 OS=Homo sapiens OX=9606 GN=CYSTM1 PE=1 SV=1	Q9H1C7
161	TRUE	P63010|AP2B1_HUMAN	11.4	4.16	3	3		87.3738	510.821	587.591	569.959	1392.96	1325.42	823.208	716.46	0.12:0.68:0.78:0.76:1.85:1.76:1.10:0.95	497.047	1064.51	0.64:1.36	104553	AP-2 complex subunit beta OS=Homo sapiens OX=9606 GN=AP2B1 PE=1 SV=1	P63010
437	TRUE	P61026|RAB10_HUMAN	14.64	26.5	5	5		1296.96	1211.72	3008.02	3316.94	6084.31	7998.51	3831.29	3308.74	0.35:0.32:0.80:0.88:1.62:2.13:1.02:0.88	2208.41	5305.71	0.59:1.41	22541	Ras-related protein Rab-10 OS=Homo sapiens OX=9606 GN=RAB10 PE=1 SV=1	P61026
231	TRUE	Q92797|SYMPK_HUMAN	1.13	1.02	1	1		1129.31	948.873	847.287	663.945	1144.05	1543.04	602.334	376.383	1.25:1.05:0.93:0.73:1.26:1.70:0.66:0.42	897.354	916.451	0.99:1.01	141148	Symplekin OS=Homo sapiens OX=9606 GN=SYMPK PE=1 SV=2	Q92797
81	TRUE	P07355|ANXA2_HUMAN	8.57	61.65	25	25	Carbamidomethylation; Oxidation (M)	50091.7	55778.6	90794.9	113866	82818.2	100343	118737	131470	0.54:0.60:0.98:1.22:0.89:1.08:1.28:1.41	77632.9	108342	0.83:1.17	38604	Annexin A2 OS=Homo sapiens OX=9606 GN=ANXA2 PE=1 SV=2	P07355
1080	TRUE	P0C0L4|CO4A_HUMAN	0.4	1.55	2	2		64.1279	153.432	1132.83	1202.75	452.211	366.757	343.662	331.519	0.13:0.30:2.24:2.38:0.89:0.72:0.68:0.66	744.814	373.537	1.33:0.67	192785	Complement C4-A OS=Homo sapiens OX=9606 GN=C4A PE=1 SV=2	P0C0L4
812	TRUE	Q99829|CPNE1_HUMAN	6.27	1.68	1	1		116.91	144.192	115.21	192.279	209.812	175.744	215.217	120.821	0.72:0.89:0.71:1.19:1.30:1.09:1.33:0.75	142.148	180.398	0.88:1.12	59059	Copine-1 OS=Homo sapiens OX=9606 GN=CPNE1 PE=1 SV=1	Q99829
156	TRUE	Q12965|MYO1E_HUMAN	7.34	1.53	1	1		52.0877	68.9833	92.3023	136.748	99.2111	124.896	114.556	113.823	0.52:0.69:0.92:1.36:0.99:1.24:1.14:1.13	87.5304	113.121	0.87:1.13	127062	Unconventional myosin-Ie OS=Homo sapiens OX=9606 GN=MYO1E PE=1 SV=2	Q12965
306	TRUE	Q9NZN4|EHD2_HUMAN	12.88	6.45	5	3	Oxidation (M)	261.12	261.024	478.665	893.929	1519.66	1920.58	711.684	663.767	0.31:0.31:0.57:1.07:1.81:2.29:0.85:0.79	590.372	1203.92	0.66:1.34	61161	EH domain-containing protein 2 OS=Homo sapiens OX=9606 GN=EHD2 PE=1 SV=2	Q9NZN4
1340	TRUE	Q96L46|CPNS2_HUMAN	20.23	5.24	1	1	Oxidation (M)	0	0	53.1095	0	1429.78	58.7518	206.576	184.083	0.00:0.00:0.22:0.00:5.92:0.24:0.86:0.76	53.1095	469.797	0.20:1.80	27660	Calpain small subunit 2 OS=Homo sapiens OX=9606 GN=CAPNS2 PE=1 SV=2	Q96L46
649	TRUE	Q9H2K8|TAOK3_HUMAN	12.1	1.45	1	1		68.9071	0	113.548	100.327	102.462	211.898	183.989	156.494	0.59:0.00:0.97:0.86:0.87:1.81:1.57:1.34	94.2607	163.711	0.73:1.27	105406	Serine/threonine-protein kinase TAO3 OS=Homo sapiens OX=9606 GN=TAOK3 PE=1 SV=2	Q9H2K8
701	TRUE	Q9P289|STK26_HUMAN	14.59	6.01	2	2		87.1134	75.1155	223.663	200.356	383.645	392.37	217.372	272.942	0.38:0.32:0.97:0.87:1.66:1.69:0.94:1.18	196.436	316.582	0.77:1.23	46529	Serine/threonine-protein kinase 26 OS=Homo sapiens OX=9606 GN=STK26 PE=1 SV=2	Q9P289
192	TRUE	Q9Y2A7|NCKP1_HUMAN	20.42	5.94	6	6	Oxidation (M)	625.345	628.822	943.09	1029.11	1865.92	2659.03	1256.01	1469.95	0.48:0.48:0.72:0.79:1.42:2.03:0.96:1.12	806.592	1812.73	0.62:1.38	128790	Nck-associated protein 1 OS=Homo sapiens OX=9606 GN=NCKAP1 PE=1 SV=1	Q9Y2A7
1138	TRUE	P02679|FIBG_HUMAN	6.11	5.52	2	2		120.387	111.188	177.819	163.237	120.435	143.245	275.449	328.392	0.67:0.62:0.99:0.91:0.67:0.80:1.53:1.82	143.158	216.88	0.80:1.20	51512	Fibrinogen gamma chain OS=Homo sapiens OX=9606 GN=FGG PE=1 SV=3	P02679
423	TRUE	Q92597|NDRG1_HUMAN	0.74	22.34	6	6	Oxidation (M)	2350.58	2096.94	9981.82	9615.59	6040.4	7184.16	3936.18	4035.23	0.42:0.37:1.77:1.70:1.07:1.27:0.70:0.71	6011.23	5298.99	1.06:0.94	42835	Protein NDRG1 OS=Homo sapiens OX=9606 GN=NDRG1 PE=1 SV=1	Q92597
409	TRUE	P21281|VATB2_HUMAN	7.88	10.76	5	5		1115.4	1118.92	849.19	1335.18	1349.63	806.598	5952.99	7686.23	0.44:0.44:0.34:0.53:0.53:0.32:2.36:3.04	1104.67	3948.86	0.44:1.56	56501	V-type proton ATPase subunit B, brain isoform OS=Homo sapiens OX=9606 GN=ATP6V1B2 PE=1 SV=3	P21281
264	TRUE	Q9Y5Y6|ST14_HUMAN	22.47	9.01	5	5		1423.65	1216.87	1432.29	1722.95	3582.52	5101.73	2292.17	2601.16	0.59:0.50:0.59:0.71:1.48:2.11:0.95:1.07	1487.8	3394.39	0.61:1.39	94770	Suppressor of tumorigenicity 14 protein OS=Homo sapiens OX=9606 GN=ST14 PE=1 SV=2	Q9Y5Y6
154	TRUE	O00159|MYO1C_HUMAN	15.08	15.15	13	12	Oxidation (M)	1100.62	975.88	2668.53	2197.9	4661.46	5165.69	2719.76	2796.39	0.40:0.35:0.96:0.79:1.67:1.85:0.98:1.00	1735.73	3835.82	0.62:1.38	121682	Unconventional myosin-Ic OS=Homo sapiens OX=9606 GN=MYO1C PE=1 SV=4	O00159
360	TRUE	Q86X29|LSR_HUMAN	14.34	12.33	5	5	Oxidation (M)	936.135	1045.58	1615.4	1683.07	3880.54	5865.63	1980.47	1792.08	0.40:0.44:0.69:0.72:1.65:2.50:0.84:0.76	1320.05	3379.68	0.56:1.44	71439	Lipolysis-stimulated lipoprotein receptor OS=Homo sapiens OX=9606 GN=LSR PE=1 SV=4	Q86X29
85	TRUE	Q03001|DYST_HUMAN	16.95	0.12	1	1		162.446	216.414	0	0	1392.37	906.016	0	0	0.49:0.65:0.00:0.00:4.16:2.71:0.00:0.00	189.43	1149.19	0.28:1.72	860662	Dystonin OS=Homo sapiens OX=9606 GN=DST PE=1 SV=4	Q03001
1140	TRUE	O75608|LYPA1_HUMAN	3.46	4.78	1	1		121.594	461.567	513.512	411.985	87.0359	278.529	3569.16	3242.71	0.11:0.43:0.47:0.38:0.08:0.26:3.29:2.99	377.165	1794.36	0.35:1.65	24670	Acyl-protein thioesterase 1 OS=Homo sapiens OX=9606 GN=LYPLA1 PE=1 SV=1	O75608
1287	TRUE	Q9H3Z4|DNJC5_HUMAN	10.22	7.07	1	1		341.394	1035.88	3000.4	2867.51	4455.23	5958.53	3030.24	2787.29	0.12:0.35:1.02:0.98:1.52:2.03:1.03:0.95	1811.3	4057.82	0.62:1.38	22149	DnaJ homolog subfamily C member 5 OS=Homo sapiens OX=9606 GN=DNAJC5 PE=1 SV=1	Q9H3Z4
1455	TRUE	Q15836|VAMP3_HUMAN	6.22	24	1	1		196.913	440.379	475.306	502.874	556.599	472.959	441.522	597.74	0.43:0.96:1.03:1.09:1.21:1.03:0.96:1.30	403.868	517.205	0.88:1.12	11309	Vesicle-associated membrane protein 3 OS=Homo sapiens OX=9606 GN=VAMP3 PE=1 SV=3	Q15836
1455	TRUE	P63027|VAMP2_HUMAN	6.22	20.69	1	1		196.913	440.379	475.306	502.874	556.599	472.959	441.522	597.74	0.43:0.96:1.03:1.09:1.21:1.03:0.96:1.30	403.868	517.205	0.88:1.12	12663	Vesicle-associated membrane protein 2 OS=Homo sapiens OX=9606 GN=VAMP2 PE=1 SV=3	P63027
396	TRUE	P08865|RSSA_HUMAN	19.33	9.83	2	2	Acetylation (N-term); Oxidation (M)	0	0	314.077	299.551	0	0	2137.46	1463.05	0.00:0.00:0.60:0.57:0.00:0.00:4.06:2.78	306.814	1800.25	0.29:1.71	32854	40S ribosomal protein SA OS=Homo sapiens OX=9606 GN=RPSA PE=1 SV=4	P08865
314	TRUE	P26232|CTNA2_HUMAN	11.13	1.89	5	1		1520.28	1035.81	4264.95	4513.81	7985.34	10266.1	4260.41	3766.88	0.32:0.22:0.91:0.96:1.70:2.18:0.91:0.80	2833.71	6569.69	0.60:1.40	105313	Catenin alpha-2 OS=Homo sapiens OX=9606 GN=CTNNA2 PE=1 SV=5	P26232
622	TRUE	Q96CW1|AP2M1_HUMAN	15.65	2.3	1	1		88.772	67.1244	208.39	172.811	352.96	263.982	247.764	245.315	0.43:0.33:1.01:0.84:1.71:1.28:1.20:1.19	134.274	277.505	0.65:1.35	49655	AP-2 complex subunit mu OS=Homo sapiens OX=9606 GN=AP2M1 PE=1 SV=2	Q96CW1
380	TRUE	P12931|SRC_HUMAN	11.07	18.84	9	7		548.357	875.297	418.986	584.681	2524.16	2772.02	549.2	1030.95	0.47:0.75:0.36:0.50:2.17:2.38:0.47:0.89	606.83	1719.08	0.52:1.48	59835	Proto-oncogene tyrosine-protein kinase Src OS=Homo sapiens OX=9606 GN=SRC PE=1 SV=3	P12931
970	TRUE	Q9UBI6|GBG12_HUMAN	11.15	56.94	3	3	Carbamidomethylation; Oxidation (M)	1278.52	1446.99	3051.31	2860.73	8464.12	7968.86	3044.27	2355.25	0.34:0.38:0.80:0.75:2.22:2.09:0.80:0.62	2231.84	5539.88	0.57:1.43	8006	Guanine nucleotide-binding protein G(I)/G(S)/G(O) subunit gamma-12 OS=Homo sapiens OX=9606 GN=GNG12 PE=1 SV=3	Q9UBI6
566	TRUE	Q9UL25|RAB21_HUMAN	1.74	21.33	3	3		502.984	521.765	1428.67	474.839	679.209	1001.05	431.909	1114.07	0.65:0.68:1.86:0.62:0.88:1.30:0.56:1.45	732.065	806.56	0.95:1.05	24348	Ras-related protein Rab-21 OS=Homo sapiens OX=9606 GN=RAB21 PE=1 SV=3	Q9UL25
1419	TRUE	P01876|IGHA1_HUMAN	0.45	4.25	1	1		1189.79	691.244	222.806	281.142	889.205	247.77	353.709	516.465	2.17:1.26:0.41:0.51:1.62:0.45:0.64:0.94	596.246	501.787	1.09:0.91	37655	Immunoglobulin heavy constant alpha 1 OS=Homo sapiens OX=9606 GN=IGHA1 PE=1 SV=2	P01876
78	TRUE	P02786|TFR1_HUMAN	0.92	25.53	16	16	Oxidation (M)	2671.8	2968.25	10091.1	9225.15	7521.81	9522.06	2822.37	2187.57	0.45:0.51:1.72:1.57:1.28:1.62:0.48:0.37	6239.07	5513.45	1.06:0.94	84871	Transferrin receptor protein 1 OS=Homo sapiens OX=9606 GN=TFRC PE=1 SV=2	P02786
378	TRUE	P08754|GNAI3_HUMAN	10.17	19.77	10	5	Oxidation (M)	918.895	921.522	1639.97	1698.12	4589.45	5347.34	2048.04	1124.52	0.40:0.40:0.72:0.74:2.01:2.34:0.90:0.49	1294.63	3277.34	0.57:1.43	40532	Guanine nucleotide-binding protein G(i) subunit alpha OS=Homo sapiens OX=9606 GN=GNAI3 PE=1 SV=3	P08754
214	TRUE	P13797|PLST_HUMAN	7.5	22.06	11	11	Acetylation (N-term); Oxidation (M)	679.014	464.701	2340.33	1894.97	1194.48	1234.11	6077.74	7198.32	0.26:0.18:0.89:0.72:0.45:0.47:2.31:2.73	1344.75	3926.16	0.51:1.49	70811	Plastin-3 OS=Homo sapiens OX=9606 GN=PLS3 PE=1 SV=4	P13797
672	TRUE	P01116|RASK_HUMAN	10.82	4.76	6	1		198.621	215.846	313.917	195.839	976.476	940.15	313.156	231.262	0.47:0.51:0.74:0.46:2.31:2.22:0.74:0.55	231.056	615.261	0.55:1.45	21656	GTPase KRas OS=Homo sapiens OX=9606 GN=KRAS PE=1 SV=1	P01116
910	TRUE	P21283|VATC1_HUMAN	1.74	4.19	1	1		90.7973	97.856	228.017	390.306	223.665	239.427	144.173	198.148	0.45:0.49:1.13:1.94:1.11:1.19:0.72:0.98	201.744	201.353	1.00:1.00	43942	V-type proton ATPase subunit C 1 OS=Homo sapiens OX=9606 GN=ATP6V1C1 PE=1 SV=4	P21283
194	TRUE	Q9NXE4|NSMA3_HUMAN	0.15	1.27	1	1		153.09	108.235	393.001	111.255	183.948	269.56	61.9355	255.744	0.80:0.56:2.05:0.58:0.96:1.40:0.32:1.33	191.395	192.797	1.00:1.00	97810	Sphingomyelin phosphodiesterase 4 OS=Homo sapiens OX=9606 GN=SMPD4 PE=1 SV=3	Q9NXE4
1107	TRUE	O95197|RTN3_HUMAN	14.66	1.07	1	1		116.454	137.312	146.744	169.986	221.314	162.87	244.643	175.047	0.68:0.80:0.85:0.99:1.29:0.95:1.42:1.02	142.624	200.968	0.83:1.17	112611	Reticulon-3 OS=Homo sapiens OX=9606 GN=RTN3 PE=1 SV=2	O95197
821	TRUE	Q9UKE5|TNIK_HUMAN	15.53	3.6	4	4		908.995	1038.42	1697.82	522.496	3920.27	2672.98	1748.75	1692.48	0.51:0.58:0.96:0.29:2.21:1.51:0.99:0.95	1041.93	2508.62	0.59:1.41	154943	TRAF2 and NCK-interacting protein kinase OS=Homo sapiens OX=9606 GN=TNIK PE=1 SV=1	Q9UKE5
830	TRUE	P61421|VA0D1_HUMAN	14.94	13.39	4	4		905.975	838.101	1736.31	1185.92	3170.7	3939.79	1701.59	1609.93	0.48:0.44:0.92:0.63:1.68:2.09:0.90:0.85	1166.57	2605.5	0.62:1.38	40329	V-type proton ATPase subunit d 1 OS=Homo sapiens OX=9606 GN=ATP6V0D1 PE=1 SV=1	P61421
367	TRUE	Q14254|FLOT2_HUMAN	1.91	14.25	5	5	Oxidation (M)	755.629	705.137	1936.73	2628.81	1557.96	1715.64	2682.67	839.301	0.47:0.44:1.21:1.64:0.97:1.07:1.67:0.52	1506.58	1698.89	0.94:1.06	47064	Flotillin-2 OS=Homo sapiens OX=9606 GN=FLOT2 PE=1 SV=2	Q14254
1021	TRUE	P02675|FIBB_HUMAN	5.96	8.55	3	3		71.9672	91.4141	156.292	123.549	84.5001	82.5404	661.578	578.092	0.31:0.40:0.68:0.53:0.37:0.36:2.86:2.50	110.806	504.367	0.36:1.64	55928	Fibrinogen beta chain OS=Homo sapiens OX=9606 GN=FGB PE=1 SV=2	P02675
73	TRUE	O60716|CTND1_HUMAN	15.14	21.9	15	15	Oxidation (M)	1468.37	1551.11	1456.6	974.573	3974.47	5490.16	1894.83	1949.32	0.63:0.66:0.62:0.42:1.69:2.34:0.81:0.83	1362.66	3327.19	0.58:1.42	108170	Catenin delta-1 OS=Homo sapiens OX=9606 GN=CTNND1 PE=1 SV=1	O60716
401	TRUE	Q16658|FSCN1_HUMAN	1.6	13.79	6	6		920.669	1139.57	1429.78	1632.1	1535.27	2453.53	1052.13	937.822	0.66:0.82:1.03:1.18:1.11:1.77:0.76:0.68	1280.53	1494.69	0.92:1.08	54530	Fascin OS=Homo sapiens OX=9606 GN=FSCN1 PE=1 SV=3	Q16658
116	TRUE	P25705|ATPA_HUMAN	12.59	8.68	4	4		281.326	543.133	698.128	659.322	855.481	635.066	1500.57	1346.6	0.35:0.67:0.86:0.81:1.05:0.78:1.84:1.65	580.347	1084.43	0.70:1.30	59751	ATP synthase subunit alpha, mitochondrial OS=Homo sapiens OX=9606 GN=ATP5F1A PE=1 SV=1	P25705
1275	TRUE	P06310|KV230_HUMAN	4.6	10.83	1	1		472.018	400.535	352.471	353.071	88.157	1056.08	88.7138	254.208	1.23:1.05:0.92:0.92:0.23:2.76:0.23:0.66	394.524	371.791	1.03:0.97	13185	Immunoglobulin kappa variable 2-30 OS=Homo sapiens OX=9606 GN=IGKV2-30 PE=3 SV=2	P06310
1275	TRUE	P01615|KVD28_HUMAN	4.6	10.83	1	1		472.018	400.535	352.471	353.071	88.157	1056.08	88.7138	254.208	1.23:1.05:0.92:0.92:0.23:2.76:0.23:0.66	394.524	371.791	1.03:0.97	12957	Immunoglobulin kappa variable 2D-28 OS=Homo sapiens OX=9606 GN=IGKV2D-28 PE=1 SV=2	P01615
1275	TRUE	A0A087WW87|KV240_HUMAN	4.6	10.74	1	1		472.018	400.535	352.471	353.071	88.157	1056.08	88.7138	254.208	1.23:1.05:0.92:0.92:0.23:2.76:0.23:0.66	394.524	371.791	1.03:0.97	13310	Immunoglobulin kappa variable 2-40 OS=Homo sapiens OX=9606 GN=IGKV2-40 PE=3 SV=2	A0A087
1275	TRUE	A2NJV5|KV229_HUMAN	4.6	10.83	1	1		472.018	400.535	352.471	353.071	88.157	1056.08	88.7138	254.208	1.23:1.05:0.92:0.92:0.23:2.76:0.23:0.66	394.524	371.791	1.03:0.97	13085	Immunoglobulin kappa variable 2-29 OS=Homo sapiens OX=9606 GN=IGKV2-29 PE=3 SV=2	A2NJV5
1275	TRUE	A0A0A0MRZ7|KVD26_HUMAN	4.6	10.83	1	1		472.018	400.535	352.471	353.071	88.157	1056.08	88.7138	254.208	1.23:1.05:0.92:0.92:0.23:2.76:0.23:0.66	394.524	371.791	1.03:0.97	13297	Immunoglobulin kappa variable 2D-26 OS=Homo sapiens OX=9606 GN=IGKV2D-26 PE=3 SV=1	A0A0A0
1275	TRUE	P01614|KVD40_HUMAN	4.6	10.74	1	1		472.018	400.535	352.471	353.071	88.157	1056.08	88.7138	254.208	1.23:1.05:0.92:0.92:0.23:2.76:0.23:0.66	394.524	371.791	1.03:0.97	13310	Immunoglobulin kappa variable 2D-40 OS=Homo sapiens OX=9606 GN=IGKV2D-40 PE=1 SV=2	P01614
651	TRUE	P54707|AT12A_HUMAN	0.16	1.44	3	1		365.774	54.4212	899.698	717.052	87.2245	114.93	1026.64	1042.5	0.68:0.10:1.67:1.33:0.16:0.21:1.91:1.94	509.236	567.822	0.95:1.05	115511	Potassium-transporting ATPase alpha chain 2 OS=Homo sapiens OX=9606 GN=ATP12A PE=1 SV=3	P54707
746	TRUE	Q5VZ89|DEN4C_HUMAN	0.79	0.47	1	1		832.038	1412.93	522.975	551.048	981.212	1572.51	380.222	399.656	1.00:1.70:0.63:0.66:1.18:1.89:0.46:0.48	829.747	833.4	1.00:1.00	212711	DENN domain-containing protein 4C OS=Homo sapiens OX=9606 GN=DENND4C PE=1 SV=3	Q5VZ89
759	TRUE	Q9NUP9|LIN7C_HUMAN	18.85	17.26	3	3	Acetylation (N-term); Oxidation (M)	585.479	617.811	988.553	935.2	1651.08	2301.19	1129.99	1350.37	0.49:0.52:0.83:0.78:1.38:1.93:0.95:1.13	781.761	1608.16	0.65:1.35	21834	Protein lin-7 homolog C OS=Homo sapiens OX=9606 GN=LIN7C PE=1 SV=1	Q9NUP9
663	TRUE	P10301|RRAS_HUMAN	16.3	20.64	4	3		1056.65	909.225	1155.59	1053.8	3708.12	2952.1	1702.83	1278.99	0.61:0.53:0.67:0.61:2.15:1.71:0.99:0.74	1043.82	2410.51	0.60:1.40	23480	Ras-related protein R-Ras OS=Homo sapiens OX=9606 GN=RRAS PE=1 SV=1	P10301
1059	TRUE	Q8WUM9|S20A1_HUMAN	1.1	1.47	1	1		139.468	35.2647	159.047	0	81.2713	158.703	0	0	1.94:0.49:2.22:0.00:1.13:2.21:0.00:0.00	111.26	119.987	0.96:1.04	73700	Sodium-dependent phosphate transporter 1 OS=Homo sapiens OX=9606 GN=SLC20A1 PE=1 SV=1	Q8WUM9
286	TRUE	P60903|S10AA_HUMAN	2.59	37.11	3	3	Oxidation (M)	688.216	2606.24	23054.8	20317.1	6841.16	10750.4	10593.3	9332.69	0.07:0.25:2.19:1.93:0.65:1.02:1.01:0.89	11666.6	9379.38	1.11:0.89	11203	Protein S100-A10 OS=Homo sapiens OX=9606 GN=S100A10 PE=1 SV=2	P60903
48	TRUE	P35221|CTNA1_HUMAN	8.92	32.56	22	18	Acetylation (N-term); Carbamidomethylation; Oxidation (M)	4025.49	3085.68	12340.7	12305.6	23465.1	27897.5	9317.3	8776.34	0.32:0.24:0.98:0.97:1.85:2.21:0.74:0.69	7939.37	17364.1	0.63:1.37	100071	Catenin alpha-1 OS=Homo sapiens OX=9606 GN=CTNNA1 PE=1 SV=1	P35221
109	TRUE	Q8IWT6|LRC8A_HUMAN	2.88	5.31	4	4		226.639	241.708	756.006	796.071	660.533	638.486	467.109	453.34	0.43:0.46:1.43:1.50:1.25:1.20:0.88:0.86	691.351	554.867	1.11:0.89	94199	Volume-regulated anion channel subunit LRRC8A OS=Homo sapiens OX=9606 GN=LRRC8A PE=1 SV=1	Q8IWT6
101	TRUE	O00571|DDX3X_HUMAN	4.49	14.65	8	8		408.044	460.264	754.34	761.682	309.668	434.35	3481.79	3318.72	0.33:0.37:0.61:0.61:0.25:0.35:2.81:2.67	596.082	2191.28	0.43:1.57	73243	ATP-dependent RNA helicase DDX3X OS=Homo sapiens OX=9606 GN=DDX3X PE=1 SV=3	O00571
775	TRUE	Q15642|CIP4_HUMAN	5.49	1.66	1	1		0	3655.77	0	0	126.758	147.891	57.0301	58.6592	0.00:7.23:0.00:0.00:0.25:0.29:0.11:0.12	3655.77	97.5845	1.95:0.05	68352	Cdc42-interacting protein 4 OS=Homo sapiens OX=9606 GN=TRIP10 PE=1 SV=3	Q15642
503	TRUE	P05120|PAI2_HUMAN	5.61	20	8	8	Oxidation (M)	354.891	312.511	1062.6	957.039	439.658	529.221	3271.25	3156.92	0.28:0.25:0.84:0.76:0.35:0.42:2.60:2.50	671.759	1849.26	0.53:1.47	46596	Plasminogen activator inhibitor 2 OS=Homo sapiens OX=9606 GN=SERPINB2 PE=1 SV=2	P05120
1373	TRUE	P01034|CYTC_HUMAN	2.44	7.53	1	1		126.567	138.835	524.888	401.234	110.8	0	651.623	691.996	0.38:0.42:1.59:1.21:0.34:0.00:1.97:2.09	297.881	484.806	0.76:1.24	15799	Cystatin-C OS=Homo sapiens OX=9606 GN=CST3 PE=1 SV=1	P01034
719	TRUE	P06703|S10A6_HUMAN	8.4	10	1	1	Oxidation (M)	146.758	112.556	396.034	389.156	394.941	237.722	1299.35	534.727	0.33:0.26:0.90:0.89:0.90:0.54:2.96:1.22	261.126	616.684	0.59:1.41	10180	Protein S100-A6 OS=Homo sapiens OX=9606 GN=S100A6 PE=1 SV=1	P06703
1397	TRUE	Q14802|FXYD3_HUMAN	12.01	21.84	1	1		116.716	158.54	398.939	419.658	399.725	679.966	551.421	472.597	0.29:0.40:1.00:1.05:1.00:1.70:1.38:1.18	273.463	525.927	0.68:1.32	9263	FXYD domain-containing ion transport regulator 3 OS=Homo sapiens OX=9606 GN=FXYD3 PE=1 SV=1	Q14802
75	TRUE	O95425|SVIL_HUMAN	1.63	0.81	1	1	Carbamidomethylation	1069.91	1459.31	4764.59	4641.83	1210.12	2130.27	5338.89	6363.49	0.32:0.43:1.41:1.38:0.36:0.63:1.58:1.89	2983.91	3760.7	0.88:1.12	247746	Supervillin OS=Homo sapiens OX=9606 GN=SVIL PE=1 SV=2	O95425
202	TRUE	Q9UKV3|ACINU_HUMAN	2.17	1.04	1	1	Acetylation (N-term)	2385.97	428.194	2370.52	4681.75	10464	10206.1	2623.49	327.667	0.57:0.10:0.57:1.12:2.50:2.44:0.63:0.08	2466.61	5905.31	0.59:1.41	151862	Apoptotic chromatin condensation inducer in the nucleus OS=Homo sapiens OX=9606 GN=ACIN1 PE=1 SV=2	Q9UKV3
336	TRUE	P27105|STOM_HUMAN	8.92	52.43	9	9	Carbamidomethylation; Oxidation (M)	16377.2	15314.3	21863	23522.8	64020.5	65012.6	20955	18575.9	0.53:0.50:0.71:0.77:2.09:2.12:0.68:0.60	19269.3	42141	0.63:1.37	31731	Stomatin OS=Homo sapiens OX=9606 GN=STOM PE=1 SV=3	P27105
690	TRUE	O75083|WDR1_HUMAN	13.12	8.58	3	3		312.912	349.489	390.113	355.354	441.07	412.611	1064.74	953.485	0.58:0.65:0.73:0.66:0.82:0.77:1.99:1.78	351.967	717.975	0.66:1.34	66194	WD repeat-containing protein 1 OS=Homo sapiens OX=9606 GN=WDR1 PE=1 SV=4	O75083
124	TRUE	Q99959|PKP2_HUMAN	6.29	1.25	1	1		70.3843	61.5349	139.605	116.627	92.9788	183.436	130.695	114.124	0.62:0.54:1.23:1.03:0.82:1.61:1.15:1.00	97.0379	130.309	0.85:1.15	97415	Plakophilin-2 OS=Homo sapiens OX=9606 GN=PKP2 PE=1 SV=2	Q99959
471	TRUE	P29966|MARCS_HUMAN	9.72	34.94	7	7		695.552	581.023	955.3	835.015	2324.06	2492.79	1038.45	678.638	0.58:0.48:0.80:0.70:1.94:2.08:0.87:0.57	766.722	1705.42	0.62:1.38	31555	Myristoylated alanine-rich C-kinase substrate OS=Homo sapiens OX=9606 GN=MARCKS PE=1 SV=4	P29966
1574	TRUE	P68402|PA1B2_HUMAN	4.62	8.3	1	1		57.8587	79.865	138.074	162.225	128.554	196.111	111.823	112.529	0.47:0.65:1.12:1.31:1.04:1.59:0.91:0.91	109.506	137.255	0.89:1.11	25569	Platelet-activating factor acetylhydrolase IB subunit alpha2 OS=Homo sapiens OX=9606 GN=PAFAH1B2 PE=1 SV=1	P68402
905	TRUE	Q04760|LGUL_HUMAN	9.84	9.78	2	2	Oxidation (M)	330.235	254.68	148.039	155.206	188.862	345.703	967.88	832.461	0.82:0.63:0.37:0.39:0.47:0.86:2.40:2.07	259.998	632.431	0.58:1.42	20778	Lactoylglutathione lyase OS=Homo sapiens OX=9606 GN=GLO1 PE=1 SV=4	Q04760
755	TRUE	Q8WUD1|RAB2B_HUMAN	21.77	17.13	3	3		628.185	663.744	1011.3	1141.6	1853	1485.34	1549.31	1482.84	0.51:0.54:0.82:0.93:1.51:1.21:1.26:1.21	861.208	1592.62	0.70:1.30	24214	Ras-related protein Rab-2B OS=Homo sapiens OX=9606 GN=RAB2B PE=1 SV=1	Q8WUD1
620	TRUE	Q93050|VPP1_HUMAN	12.89	6.57	4	4	Oxidation (M)	480.832	627.387	775.113	993.891	923.915	1178.98	1083.55	966.748	0.55:0.71:0.88:1.13:1.05:1.34:1.23:1.10	766.54	1038.3	0.85:1.15	96413	V-type proton ATPase 116 kDa subunit a1 OS=Homo sapiens OX=9606 GN=ATP6V0A1 PE=1 SV=3	Q93050
1517	TRUE	O75695|XRP2_HUMAN	10.61	2.86	1	1		321.671	306.495	445.374	414.982	850.189	1408.33	353.255	546.025	0.55:0.53:0.77:0.71:1.46:2.42:0.61:0.94	372.13	789.449	0.64:1.36	39641	Protein XRP2 OS=Homo sapiens OX=9606 GN=RP2 PE=1 SV=4	O75695
317	TRUE	Q9HCK8|CHD8_HUMAN	1.21	0.35	1	1	Acetylation (N-term)	316.567	135.238	865.168	1182.62	228.382	286.715	1247.3	1288.02	0.46:0.19:1.25:1.70:0.33:0.41:1.80:1.86	624.899	762.603	0.90:1.10	290519	Chromodomain-helicase-DNA-binding protein 8 OS=Homo sapiens OX=9606 GN=CHD8 PE=1 SV=5	Q9HCK8
1492	TRUE	Q9NRY6|PLS3_HUMAN	1.79	6.78	1	1		149.484	182.497	258.472	450.068	205.406	557.49	208.201	247.943	0.53:0.65:0.92:1.59:0.73:1.97:0.74:0.88	260.13	304.76	0.92:1.08	31648	Phospholipid scramblase 3 OS=Homo sapiens OX=9606 GN=PLSCR3 PE=1 SV=2	Q9NRY6
31	TRUE	P13639|EF2_HUMAN	5.3	28.9	24	24	Carbamidomethylation; Oxidation (M)	3116.19	2884.68	12991	11825.9	4977.96	5392.54	34330.7	34551	0.23:0.21:0.94:0.86:0.36:0.39:2.50:2.51	7704.46	19813.1	0.56:1.44	95338	Elongation factor 2 OS=Homo sapiens OX=9606 GN=EEF2 PE=1 SV=4	P13639
762	TRUE	P67870|CSK2B_HUMAN	7.06	6.51	1	1		76.5578	0	105.518	111.239	95.2868	109.011	242.911	175.292	0.67:0.00:0.92:0.97:0.83:0.95:2.12:1.53	97.7716	155.625	0.77:1.23	24942	Casein kinase II subunit beta OS=Homo sapiens OX=9606 GN=CSNK2B PE=1 SV=1	P67870
152	TRUE	P43490|NAMPT_HUMAN	3.48	8.35	3	3		331.246	378.196	1094.61	822.615	636.588	393.065	1345.01	1293.01	0.42:0.48:1.39:1.05:0.81:0.50:1.71:1.64	656.667	916.918	0.83:1.17	55521	Nicotinamide phosphoribosyltransferase OS=Homo sapiens OX=9606 GN=NAMPT PE=1 SV=1	P43490
479	TRUE	P01111|RASN_HUMAN	7.06	4.76	7	1		301.352	341.482	405.991	45.1515	1013.44	896.336	309.838	253.338	0.68:0.77:0.91:0.10:2.27:2.01:0.69:0.57	273.494	618.238	0.61:1.39	21229	GTPase NRas OS=Homo sapiens OX=9606 GN=NRAS PE=1 SV=1	P01111
282	TRUE	P63092|GNAS2_HUMAN	7.38	31.98	9	9	Oxidation (M)	845.09	4306.78	2286.38	4822.79	9727.17	10107.6	3117.49	3048.02	0.18:0.90:0.48:1.01:2.03:2.11:0.65:0.64	3065.26	6500.07	0.64:1.36	45665	Guanine nucleotide-binding protein G(s) subunit alpha isoforms short OS=Homo sapiens OX=9606 GN=GNAS PE=1 SV=1	P63092
282	TRUE	Q5JWF2|GNAS1_HUMAN	7.38	12.15	9	9	Oxidation (M)	845.09	4306.78	2286.38	4822.79	9727.17	10107.6	3117.49	3048.02	0.18:0.90:0.48:1.01:2.03:2.11:0.65:0.64	3065.26	6500.07	0.64:1.36	111025	Guanine nucleotide-binding protein G(s) subunit alpha isoforms XLas OS=Homo sapiens OX=9606 GN=GNAS PE=1 SV=2	Q5JWF2
53	TRUE	Q9Y490|TLN1_HUMAN	3.53	0.55	1	1		185.255	38.0023	588.806	621.208	437.872	293.22	407.889	431.496	0.49:0.10:1.57:1.65:1.17:0.78:1.09:1.15	358.318	392.619	0.95:1.05	269767	Talin-1 OS=Homo sapiens OX=9606 GN=TLN1 PE=1 SV=3	Q9Y490
24	TRUE	Q9UPN3|MACF1_HUMAN	2.06	0.22	1	1		247.41	234.846	71.8836	0	166.091	259.897	190.678	0	1.69:1.60:0.49:0.00:1.13:1.78:1.30:0.00	184.713	205.555	0.95:1.05	838308	Microtubule-actin cross-linking factor 1, isoforms 1/2/3/5 OS=Homo sapiens OX=9606 GN=MACF1 PE=1 SV=4	Q9UPN3
707	TRUE	O00161|SNP23_HUMAN	2.87	15.64	3	3	Oxidation (M)	744.287	634.962	1655.45	1598.34	1680.55	1964.66	1073.89	846.509	0.58:0.50:1.30:1.25:1.32:1.54:0.84:0.66	1158.26	1391.4	0.91:1.09	23354	Synaptosomal-associated protein 23 OS=Homo sapiens OX=9606 GN=SNAP23 PE=1 SV=1	O00161
1235	TRUE	Q969X1|LFG3_HUMAN	8.2	4.82	2	2		601.687	292.137	1948.04	1919.17	2776.63	3338.57	1619.92	1297.61	0.35:0.17:1.13:1.11:1.61:1.94:0.94:0.75	1190.26	2258.18	0.69:1.31	34607	Protein lifeguard 3 OS=Homo sapiens OX=9606 GN=TMBIM1 PE=1 SV=2	Q969X1
394	TRUE	O75044|SRGP2_HUMAN	1.9	3.92	4	4		2529.36	2758.04	492.731	473.193	1707.83	2107.52	461.378	3452.44	1.45:1.58:0.28:0.27:0.98:1.21:0.26:1.98	1563.33	1932.29	0.89:1.11	120871	SLIT-ROBO Rho GTPase-activating protein 2 OS=Homo sapiens OX=9606 GN=SRGAP2 PE=1 SV=3	O75044
84	TRUE	P27824|CALX_HUMAN	17.81	8.78	4	4	Oxidation (M)	796.217	755.995	667.892	911.906	1221.31	1258.77	1131.57	864.241	0.84:0.79:0.70:0.96:1.28:1.32:1.19:0.91	783.002	1118.97	0.82:1.18	67568	Calnexin OS=Homo sapiens OX=9606 GN=CANX PE=1 SV=2	P27824
708	TRUE	P50148|GNAQ_HUMAN	9.74	4.18	2	1		138.972	261.936	519.853	581.855	376.143	930.652	834.259	729.367	0.25:0.48:0.95:1.06:0.69:1.70:1.53:1.33	375.654	717.605	0.69:1.31	42142	Guanine nucleotide-binding protein G(q) subunit alpha OS=Homo sapiens OX=9606 GN=GNAQ PE=1 SV=4	P50148
30	TRUE	P49368|TCPG_HUMAN	10.37	11.93	6	6	Oxidation (M)	933.204	884.852	1440.73	1490.12	1228.39	1462.49	2433.65	2614.07	0.60:0.57:0.92:0.95:0.79:0.94:1.56:1.67	1187.22	1934.65	0.76:1.24	60534	T-complex protein 1 subunit gamma OS=Homo sapiens OX=9606 GN=CCT3 PE=1 SV=4	P49368
80	TRUE	P07900|HS90A_HUMAN	5.61	11.89	18	7	Oxidation (M)	2066.01	1873.39	6507.87	6359.95	5189.61	5524.82	5808.43	5028.73	0.43:0.39:1.36:1.33:1.08:1.15:1.21:1.05	4201.8	5387.9	0.88:1.12	84660	Heat shock protein HSP 90-alpha OS=Homo sapiens OX=9606 GN=HSP90AA1 PE=1 SV=5	P07900
1016	TRUE	P14174|MIF_HUMAN	1.94	9.57	1	1	Oxidation (M)	178.583	167.32	135.193	161.538	131.814	72.2644	344.606	468.697	0.86:0.81:0.65:0.78:0.64:0.35:1.66:2.26	160.659	254.346	0.77:1.23	12476	Macrophage migration inhibitory factor OS=Homo sapiens OX=9606 GN=MIF PE=1 SV=4	P14174
927	TRUE	Q92930|RAB8B_HUMAN	10.1	5.8	1	1		0	0	0	84.5876	103.368	0	0	115.178	0.00:0.00:0.00:2.23:2.73:0.00:0.00:3.04	84.5876	109.273	0.87:1.13	23584	Ras-related protein Rab-8B OS=Homo sapiens OX=9606 GN=RAB8B PE=1 SV=2	Q92930
795	TRUE	P07948|LYN_HUMAN	10.97	6.25	3	3		195.912	244.907	534.11	476.258	624.429	805.201	385.218	784.207	0.39:0.48:1.05:0.94:1.23:1.59:0.76:1.55	400.196	649.764	0.76:1.24	58574	Tyrosine-protein kinase Lyn OS=Homo sapiens OX=9606 GN=LYN PE=1 SV=3	P07948
244	TRUE	Q12959|DLG1_HUMAN	2.62	8.96	6	6		505.968	675.872	535.273	834.053	1086.14	1133.44	702.327	366.424	0.69:0.93:0.73:1.14:1.49:1.55:0.96:0.50	637.792	822.084	0.87:1.13	100455	Disks large homolog 1 OS=Homo sapiens OX=9606 GN=DLG1 PE=1 SV=2	Q12959
1137	TRUE	O95171|SCEL_HUMAN	0.87	1.74	1	1		106.329	350.84	0	0	0	59.9078	312.173	213.918	0.82:2.69:0.00:0.00:0.00:0.46:2.39:1.64	228.584	195.333	1.08:0.92	77552	Sciellin OS=Homo sapiens OX=9606 GN=SCEL PE=1 SV=2	O95171
1330	TRUE	Q96PV0|SYGP1_HUMAN	0.69	0.82	1	1		4370.16	447.783	4866.81	9521.2	376.231	6024.65	7812.39	11268.3	0.78:0.08:0.87:1.70:0.07:1.08:1.40:2.02	4801.49	6370.4	0.86:1.14	148284	Ras/Rap GTPase-activating protein SynGAP OS=Homo sapiens OX=9606 GN=SYNGAP1 PE=1 SV=4	Q96PV0
413	TRUE	O75122|CLAP2_HUMAN	17.54	0.7	1	1		100.491	80.7829	95.8595	70.9558	102.165	127.65	177.301	155.203	0.88:0.71:0.84:0.62:0.90:1.12:1.56:1.36	87.0224	140.58	0.76:1.24	141064	CLIP-associating protein 2 OS=Homo sapiens OX=9606 GN=CLASP2 PE=1 SV=3	O75122
1032	TRUE	P11233|RALA_HUMAN	4.74	14.08	2	2		1003.93	1094.83	4441.46	4442.8	3260.84	3872.19	3641.62	2772.82	0.33:0.36:1.45:1.45:1.06:1.26:1.19:0.90	2745.76	3386.87	0.90:1.10	23567	Ras-related protein Ral-A OS=Homo sapiens OX=9606 GN=RALA PE=1 SV=1	P11233
700	TRUE	Q08209|PP2BA_HUMAN	2.94	4.41	2	2		208.225	282.342	1427.08	1281.91	1057.46	1213.47	629.279	595.951	0.25:0.34:1.71:1.53:1.26:1.45:0.75:0.71	799.889	874.038	0.96:1.04	58688	Serine/threonine-protein phosphatase 2B catalytic subunit alpha isoform OS=Homo sapiens OX=9606 GN=PPP3CA PE=1 SV=1	Q08209
634	TRUE	P07947|YES_HUMAN	1.27	2.03	3	1		0	0	101.267	109.472	54.649	196.05	57.7824	106.241	0.00:0.00:1.30:1.40:0.70:2.51:0.74:1.36	105.37	103.681	1.01:0.99	60801	Tyrosine-protein kinase Yes OS=Homo sapiens OX=9606 GN=YES1 PE=1 SV=3	P07947
522	TRUE	P00749|UROK_HUMAN	2.95	6.26	2	2		125.646	172.124	1334.13	2020.16	832.593	1409.7	1088.36	387.481	0.14:0.19:1.45:2.19:0.90:1.53:1.18:0.42	1318.03	929.534	1.17:0.83	48507	Urokinase-type plasminogen activator OS=Homo sapiens OX=9606 GN=PLAU PE=1 SV=2	P00749
1453	TRUE	Q8TC92|ENOX1_HUMAN	10.87	2.64	1	1	Carbamidomethylation; Oxidation (M)	598.264	518.852	508.739	393.059	460.196	809.414	1868	1178.77	0.76:0.66:0.64:0.50:0.58:1.02:2.36:1.49	504.729	1079.1	0.64:1.36	73348	Ecto-NOX disulfide-thiol exchanger 1 OS=Homo sapiens OX=9606 GN=ENOX1 PE=1 SV=1	Q8TC92
747	TRUE	P62070|RRAS2_HUMAN	0.23	12.75	3	2		570.156	307.224	426.971	302.055	898.683	583.724	261.817	146.203	1.30:0.70:0.98:0.69:2.06:1.34:0.60:0.33	401.601	556.885	0.84:1.16	23400	Ras-related protein R-Ras2 OS=Homo sapiens OX=9606 GN=RRAS2 PE=1 SV=1	P62070
105	TRUE	Q00341|VIGLN_HUMAN	10.71	0.87	1	1		0	0	0	65.2004	0	0	101.802	99.9956	0.00:0.00:0.00:1.95:0.00:0.00:3.05:3.00	65.2004	100.899	0.79:1.21	141456	Vigilin OS=Homo sapiens OX=9606 GN=HDLBP PE=1 SV=2	Q00341
47	TRUE	P68104|EF1A1_HUMAN	5.35	36.8	15	15	Carbamidomethylation; Oxidation (M)	3432.42	4118.38	13173.2	12947.7	4981.9	8047.39	31778	28191.4	0.26:0.31:0.99:0.97:0.37:0.60:2.38:2.11	8574.22	18421.7	0.64:1.36	50141	Elongation factor 1-alpha 1 OS=Homo sapiens OX=9606 GN=EEF1A1 PE=1 SV=1	P68104
11	TRUE	Q01082|SPTB2_HUMAN	8.15	0.51	1	1	Oxidation (M)	0	0	147.018	105.954	0	76.2702	86.5483	107.193	0.00:0.00:2.25:1.62:0.00:1.17:1.32:1.64	126.486	90.004	1.17:0.83	274609	Spectrin beta chain, non-erythrocytic 1 OS=Homo sapiens OX=9606 GN=SPTBN1 PE=1 SV=2	Q01082
1292	TRUE	P51157|RAB28_HUMAN	8.47	4.98	1	1		342.868	181.773	1531.05	1286.01	990.757	1231.17	2268.06	1809.34	0.28:0.15:1.27:1.07:0.82:1.02:1.88:1.50	835.426	1574.83	0.69:1.31	24841	Ras-related protein Rab-28 OS=Homo sapiens OX=9606 GN=RAB28 PE=1 SV=2	P51157
491	TRUE	Q9UKS6|PACN3_HUMAN	8.25	17.69	6	6		976.812	1079.28	1895.09	1915.94	3518.81	3902.21	1586.84	1430.62	0.48:0.53:0.93:0.94:1.73:1.91:0.78:0.70	1466.78	2609.62	0.72:1.28	48487	Protein kinase C and casein kinase substrate in neurons protein 3 OS=Homo sapiens OX=9606 GN=PACSIN3 PE=1 SV=2	Q9UKS6
88	TRUE	Q14160|SCRIB_HUMAN	14.56	0.61	1	1		88.9855	72.271	85.3018	138.077	221.121	219.01	132.843	119.338	0.66:0.54:0.63:1.03:1.64:1.63:0.99:0.89	96.1588	173.078	0.71:1.29	174885	Protein scribble homolog OS=Homo sapiens OX=9606 GN=SCRIB PE=1 SV=4	Q14160
1108	TRUE	P49773|HINT1_HUMAN	3.57	19.05	1	1	Oxidation (M)	0	0	230.94	130.287	0	81.8294	100.126	207.072	0.00:0.00:2.46:1.39:0.00:0.87:1.07:2.21	180.613	129.676	1.16:0.84	13802	Histidine triad nucleotide-binding protein 1 OS=Homo sapiens OX=9606 GN=HINT1 PE=1 SV=2	P49773
239	TRUE	Q16625|OCLN_HUMAN	6.56	19.73	8	8	Oxidation (M)	1051.21	1581.9	3634.72	4138.94	5702.41	6714.34	3955.2	1822.84	0.29:0.44:1.02:1.16:1.59:1.88:1.11:0.51	2601.69	4548.7	0.73:1.27	59144	Occludin OS=Homo sapiens OX=9606 GN=OCLN PE=1 SV=1	Q16625
805	TRUE	P61006|RAB8A_HUMAN	8.55	5.8	1	1		181.753	163.605	577.843	739.295	1034.25	788.661	562.054	493.414	0.32:0.29:1.02:1.30:1.82:1.39:0.99:0.87	415.624	719.595	0.73:1.27	23668	Ras-related protein Rab-8A OS=Homo sapiens OX=9606 GN=RAB8A PE=1 SV=1	P61006
1508	TRUE	Q9BV40|VAMP8_HUMAN	9.31	12	1	1		109.232	97.6376	194.312	139.903	319.797	340.711	125.961	171.469	0.58:0.52:1.04:0.75:1.71:1.82:0.67:0.92	135.271	239.484	0.72:1.28	11438	Vesicle-associated membrane protein 8 OS=Homo sapiens OX=9606 GN=VAMP8 PE=1 SV=1	Q9BV40
1408	TRUE	Q96FX8|PERP_HUMAN	1.77	8.81	1	1		229.959	237.902	189.323	186.565	489.735	1018.93	111.074	98.9641	0.72:0.74:0.59:0.58:1.53:3.18:0.35:0.31	210.937	429.676	0.66:1.34	21386	p53 apoptosis effector related to PMP-22 OS=Homo sapiens OX=9606 GN=PERP PE=1 SV=1	Q96FX8
804	TRUE	P30626|SORCN_HUMAN	8	11.11	2	2		221.436	254.552	294.613	299.052	190.973	393.57	841.892	722.145	0.55:0.63:0.73:0.74:0.47:0.98:2.09:1.80	267.413	537.145	0.66:1.34	21676	Sorcin OS=Homo sapiens OX=9606 GN=SRI PE=1 SV=1	P30626
321	TRUE	Q13618|CUL3_HUMAN	3.7	1.3	1	1		0	0	60.9435	69.9096	56.932	0	127.199	88.7996	0.00:0.00:1.21:1.39:1.13:0.00:2.52:1.76	65.4266	90.977	0.84:1.16	88930	Cullin-3 OS=Homo sapiens OX=9606 GN=CUL3 PE=1 SV=2	Q13618
1343	TRUE	Q9BSK0|MALD1_HUMAN	0.14	5.78	1	1		164.213	392.42	435.855	544.625	731.347	681.632	104.444	320.919	0.39:0.93:1.03:1.29:1.73:1.62:0.25:0.76	384.278	459.585	0.91:1.09	18914	MARVEL domain-containing protein 1 OS=Homo sapiens OX=9606 GN=MARVELD1 PE=1 SV=1	Q9BSK0
547	TRUE	P01112|RASH_HUMAN	4.97	4.76	6	1		252.939	204.583	312.693	321.936	570.355	972.421	282.93	179.689	0.65:0.53:0.81:0.83:1.47:2.51:0.73:0.46	273.038	501.349	0.71:1.29	21298	GTPase HRas OS=Homo sapiens OX=9606 GN=HRAS PE=1 SV=1	P01112
1445	TRUE	O15162|PLS1_HUMAN	7.17	6.29	1	1		178.088	205.552	394.899	565.065	549.884	392.757	414.507	482.16	0.45:0.52:0.99:1.42:1.38:0.99:1.04:1.21	335.901	459.827	0.84:1.16	35049	Phospholipid scramblase 1 OS=Homo sapiens OX=9606 GN=PLSCR1 PE=1 SV=1	O15162
992	TRUE	Q99541|PLIN2_HUMAN	0.77	2.29	1	1		2249.87	239.807	581.692	3340.97	2026.32	3953.13	670.463	388.895	1.34:0.14:0.35:1.99:1.21:2.35:0.40:0.23	1603.08	1759.7	0.95:1.05	48075	Perilipin-2 OS=Homo sapiens OX=9606 GN=PLIN2 PE=1 SV=2	Q99541
680	TRUE	P0CG48|UBC_HUMAN	11.12	5.84	4	4		29199.6	28703.2	25175.6	24545.6	50514.3	45416.9	28339.3	29542.2	0.89:0.88:0.77:0.75:1.55:1.39:0.87:0.90	26906	38453.2	0.82:1.18	77039	Polyubiquitin-C OS=Homo sapiens OX=9606 GN=UBC PE=1 SV=3	P0CG48
680	TRUE	P0CG47|UBB_HUMAN	11.12	17.47	4	4		29199.6	28703.2	25175.6	24545.6	50514.3	45416.9	28339.3	29542.2	0.89:0.88:0.77:0.75:1.55:1.39:0.87:0.90	26906	38453.2	0.82:1.18	25762	Polyubiquitin-B OS=Homo sapiens OX=9606 GN=UBB PE=1 SV=1	P0CG47
680	TRUE	P62979|RS27A_HUMAN	11.12	25.64	4	4		29199.6	28703.2	25175.6	24545.6	50514.3	45416.9	28339.3	29542.2	0.89:0.88:0.77:0.75:1.55:1.39:0.87:0.90	26906	38453.2	0.82:1.18	17965	Ubiquitin-40S ribosomal protein S27a OS=Homo sapiens OX=9606 GN=RPS27A PE=1 SV=2	P62979
680	TRUE	P62987|RL40_HUMAN	11.12	31.25	4	4		29199.6	28703.2	25175.6	24545.6	50514.3	45416.9	28339.3	29542.2	0.89:0.88:0.77:0.75:1.55:1.39:0.87:0.90	26906	38453.2	0.82:1.18	14728	Ubiquitin-60S ribosomal protein L40 OS=Homo sapiens OX=9606 GN=UBA52 PE=1 SV=2	P62987
446	TRUE	O60443|GSDME_HUMAN	5.55	2.22	1	1		125.259	251.877	573.374	373.648	532.871	1153.22	432.161	231.158	0.27:0.55:1.25:0.81:1.16:2.51:0.94:0.50	331.04	587.352	0.72:1.28	54555	Gasdermin-E OS=Homo sapiens OX=9606 GN=GSDME PE=1 SV=2	O60443
1234	TRUE	P01859|IGHG2_HUMAN	4.61	4.91	2	1		676.617	709.865	505.937	866.924	608.015	396.844	2636	2577.91	0.60:0.63:0.45:0.77:0.54:0.35:2.35:2.30	689.836	1554.69	0.61:1.39	35901	Immunoglobulin heavy constant gamma 2 OS=Homo sapiens OX=9606 GN=IGHG2 PE=1 SV=2	P01859
1301	TRUE	Q04941|PLP2_HUMAN	0.92	8.55	1	1		1138.35	1204.27	4371.27	4316.45	3708.64	4506.13	588.566	4959.69	0.37:0.39:1.41:1.39:1.20:1.45:0.19:1.60	2757.59	3440.76	0.89:1.11	16691	Proteolipid protein 2 OS=Homo sapiens OX=9606 GN=PLP2 PE=1 SV=1	Q04941
699	TRUE	P20648|ATP4A_HUMAN	2.33	2.71	3	1	Carbamidomethylation	996.098	1226.78	926.027	1947.09	816.509	992.822	1554.58	4660.24	0.61:0.75:0.56:1.19:0.50:0.61:0.95:2.84	1274	2006.04	0.78:1.22	114119	Potassium-transporting ATPase alpha chain 1 OS=Homo sapiens OX=9606 GN=ATP4A PE=2 SV=5	P20648
255	TRUE	O43491|E41L2_HUMAN	15.25	3.88	3	3		279.129	335.679	475.811	585.779	597.559	983.296	638.391	679.035	0.49:0.59:0.83:1.02:1.04:1.72:1.12:1.19	419.099	724.57	0.73:1.27	112588	Band 4.1-like protein 2 OS=Homo sapiens OX=9606 GN=EPB41L2 PE=1 SV=1	O43491
642	TRUE	P62330|ARF6_HUMAN	4.6	26.86	4	4	Oxidation (M)	906.158	1002.7	892.871	776.139	3248.3	1783.16	930.636	562.985	0.72:0.79:0.71:0.61:2.57:1.41:0.74:0.45	894.467	1631.27	0.71:1.29	20082	ADP-ribosylation factor 6 OS=Homo sapiens OX=9606 GN=ARF6 PE=1 SV=2	P62330
1244	TRUE	P60033|CD81_HUMAN	3.61	8.47	2	2		2702.21	2032.7	11373.2	9466.14	9798.97	10509.3	4500.16	6311.41	0.38:0.29:1.60:1.34:1.38:1.48:0.64:0.89	6393.56	7779.97	0.90:1.10	25809	CD81 antigen OS=Homo sapiens OX=9606 GN=CD81 PE=1 SV=1	P60033
354	TRUE	P51148|RAB5C_HUMAN	9.07	27.31	7	4	Oxidation (M)	2079.13	2087.62	6787.86	6407.32	7518.31	9832.1	5683.19	5787.05	0.36:0.36:1.18:1.11:1.30:1.70:0.98:1.00	4340.48	7205.16	0.75:1.25	23483	Ras-related protein Rab-5C OS=Homo sapiens OX=9606 GN=RAB5C PE=1 SV=2	P51148
883	TRUE	P61769|B2MG_HUMAN	8.12	16.81	2	2		4225.11	3624.87	11505.9	14147.3	15300.5	20318.4	10541.2	9489.59	0.38:0.33:1.03:1.27:1.37:1.82:0.95:0.85	8375.77	13912.4	0.75:1.25	13715	Beta-2-microglobulin OS=Homo sapiens OX=9606 GN=B2M PE=1 SV=1	P61769
405	TRUE	P20339|RAB5A_HUMAN	6.38	13.02	5	2	Oxidation (M)	217.361	481.764	1000.17	996.693	415.957	1288	1763.22	1516.35	0.23:0.50:1.04:1.04:0.43:1.34:1.84:1.58	673.998	1245.88	0.70:1.30	23659	Ras-related protein Rab-5A OS=Homo sapiens OX=9606 GN=RAB5A PE=1 SV=2	P20339
139	TRUE	P27816|MAP4_HUMAN	2.75	1.13	1	1		124.678	84.5454	751.229	913.288	492.848	375.57	3082.34	135.619	0.17:0.11:1.01:1.23:0.66:0.50:4.14:0.18	468.435	1021.59	0.63:1.37	121005	Microtubule-associated protein 4 OS=Homo sapiens OX=9606 GN=MAP4 PE=1 SV=3	P27816
584	TRUE	P62873|GBB1_HUMAN	7.83	18.53	7	4	Acetylation (N-term); Carbamidomethylation	2838.76	3001.06	4378.27	5024.91	10869.1	7024.1	3786.73	3987.43	0.56:0.59:0.86:0.98:2.13:1.37:0.74:0.78	3810.75	6416.85	0.75:1.25	37377	Guanine nucleotide-binding protein G(I)/G(S)/G(T) subunit beta-1 OS=Homo sapiens OX=9606 GN=GNB1 PE=1 SV=3	P62873
258	TRUE	P38606|VATA_HUMAN	10.1	6.32	3	3		264.054	261.728	507.724	667.597	640.737	432.77	904.345	1018.63	0.45:0.45:0.86:1.14:1.09:0.74:1.54:1.73	512.098	775.662	0.80:1.20	68304	V-type proton ATPase catalytic subunit A OS=Homo sapiens OX=9606 GN=ATP6V1A PE=1 SV=2	P38606
669	TRUE	P09601|HMOX1_HUMAN	4.31	17.36	4	4	Oxidation (M)	620.026	337.372	936.226	584.019	331.511	565.784	2158.35	2084.28	0.65:0.35:0.98:0.61:0.35:0.59:2.27:2.19	664.765	1441.56	0.63:1.37	32819	Heme oxygenase 1 OS=Homo sapiens OX=9606 GN=HMOX1 PE=1 SV=1	P09601
129	TRUE	P05141|ADT2_HUMAN	15.91	6.71	2	2		229.184	233.004	179.783	152.948	559.639	292.935	285.085	300.425	0.82:0.83:0.64:0.55:2.00:1.05:1.02:1.08	198.73	359.521	0.71:1.29	32852	ADP/ATP translocase 2 OS=Homo sapiens OX=9606 GN=SLC25A5 PE=1 SV=7	P05141
906	TRUE	Q9H190|SDCB2_HUMAN	9.68	10.96	3	3	Oxidation (M)	292.968	293.949	933.185	951.16	779.149	996.186	1304.36	1093.27	0.35:0.35:1.12:1.15:0.94:1.20:1.57:1.32	755.634	1043.24	0.84:1.16	31594	Syntenin-2 OS=Homo sapiens OX=9606 GN=SDCBP2 PE=1 SV=2	Q9H190
443	TRUE	O00186|STXB3_HUMAN	1.24	17.57	9	9	Oxidation (M)	11304.6	846.982	34541.5	40894.3	126719	2398.15	2303.21	3379.21	0.41:0.03:1.24:1.47:4.56:0.09:0.08:0.12	21896.8	33700	0.79:1.21	67764	Syntaxin-binding protein 3 OS=Homo sapiens OX=9606 GN=STXBP3 PE=1 SV=2	O00186
1524	TRUE	P62166|NCS1_HUMAN	1.57	6.84	1	1		114.313	144.797	206.21	228.826	367.158	290.905	230.038	63.5957	0.56:0.70:1.00:1.11:1.78:1.41:1.12:0.31	173.536	237.924	0.84:1.16	21879	Neuronal calcium sensor 1 OS=Homo sapiens OX=9606 GN=NCS1 PE=1 SV=2	P62166
316	TRUE	Q16555|DPYL2_HUMAN	12.87	7.52	3	3	Oxidation (M)	310.087	327.627	179.208	269.254	487.972	717.727	431.215	295.756	0.82:0.87:0.47:0.71:1.29:1.90:1.14:0.78	352.59	598.819	0.74:1.26	62294	Dihydropyrimidinase-related protein 2 OS=Homo sapiens OX=9606 GN=DPYSL2 PE=1 SV=1	Q16555
1362	TRUE	P12259|FA5_HUMAN	7.39	0.58	1	1		0	0	79.5515	87.9592	73.4682	80.5451	52.69	52.461	0.00:0.00:1.49:1.65:1.38:1.51:0.99:0.98	83.7554	64.7911	1.13:0.87	251703	Coagulation factor V OS=Homo sapiens OX=9606 GN=F5 PE=1 SV=4	P12259
531	TRUE	P55010|IF5_HUMAN	0.82	2.78	1	1		0	0	114.449	98.7134	0	53.7811	189.785	170.436	0.00:0.00:1.46:1.26:0.00:0.69:2.42:2.17	106.581	138.001	0.87:1.13	49223	Eukaryotic translation initiation factor 5 OS=Homo sapiens OX=9606 GN=EIF5 PE=1 SV=2	P55010
555	TRUE	P62834|RAP1A_HUMAN	3.4	7.07	7	1	Oxidation (M)	294.575	606.371	378.721	326.141	1412.73	475.604	195.288	683.884	0.54:1.11:0.69:0.60:2.58:0.87:0.36:1.25	401.452	691.877	0.73:1.27	20987	Ras-related protein Rap-1A OS=Homo sapiens OX=9606 GN=RAP1A PE=1 SV=1	P62834
510	TRUE	O15427|MOT4_HUMAN	3.52	10.97	4	4		10415.3	10711.1	21002.9	22292.8	42715.1	34077.5	12399.8	10888.7	0.51:0.52:1.02:1.08:2.08:1.66:0.60:0.53	16105.5	25020.3	0.78:1.22	49469	Monocarboxylate transporter 4 OS=Homo sapiens OX=9606 GN=SLC16A3 PE=1 SV=1	O15427
307	TRUE	Q96J02|ITCH_HUMAN	4.72	7.75	7	6		590.943	671.898	619.6	651.535	1263.11	1281.56	723.211	418.832	0.76:0.86:0.80:0.84:1.62:1.65:0.93:0.54	633.494	921.678	0.81:1.19	102803	E3 ubiquitin-protein ligase Itchy homolog OS=Homo sapiens OX=9606 GN=ITCH PE=1 SV=2	Q96J02
94	TRUE	P06576|ATPB_HUMAN	20.14	23.25	8	8	Oxidation (M)	876.143	823.025	1487.1	1032.16	1594.45	1602.57	2018.25	1875.67	0.62:0.58:1.05:0.73:1.13:1.13:1.43:1.33	1054.6	1772.73	0.75:1.25	56560	ATP synthase subunit beta, mitochondrial OS=Homo sapiens OX=9606 GN=ATP5F1B PE=1 SV=3	P06576
878	TRUE	Q99828|CIB1_HUMAN	3.5	15.18	2	2		106.883	121.746	521.749	223.457	558.152	550.897	123.223	216.351	0.35:0.40:1.72:0.74:1.84:1.82:0.41:0.71	243.459	362.156	0.80:1.20	21703	Calcium and integrin-binding protein 1 OS=Homo sapiens OX=9606 GN=CIB1 PE=1 SV=4	Q99828
562	TRUE	Q96RF0|SNX18_HUMAN	5.01	2.71	1	1		82.317	71.3991	138.828	101.338	222.354	213.255	125.847	60.4104	0.65:0.56:1.09:0.80:1.75:1.68:0.99:0.48	98.4707	155.466	0.78:1.22	68894	Sorting nexin-18 OS=Homo sapiens OX=9606 GN=SNX18 PE=1 SV=2	Q96RF0
582	TRUE	Q9ULV4|COR1C_HUMAN	8.39	7.59	2	2		197.917	480.568	716.969	523.62	446.462	683.531	1070.12	1182.05	0.30:0.73:1.08:0.79:0.67:1.03:1.61:1.78	479.769	845.541	0.72:1.28	53249	Coronin-1C OS=Homo sapiens OX=9606 GN=CORO1C PE=1 SV=1	Q9ULV4
14	TRUE	P07814|SYEP_HUMAN	3.63	2.98	3	3		268.153	244.656	458.178	554.961	384.009	176.362	1133.94	1157.33	0.49:0.45:0.84:1.01:0.70:0.32:2.07:2.12	381.487	712.911	0.70:1.30	170591	Bifunctional glutamate/proline--tRNA ligase OS=Homo sapiens OX=9606 GN=EPRS1 PE=1 SV=5	P07814
538	TRUE	P51153|RAB13_HUMAN	6.03	6.9	1	1	Oxidation (M)	409.613	480.409	439.248	431.077	1167.47	518	489.932	414.385	0.75:0.88:0.81:0.79:2.15:0.95:0.90:0.76	440.087	647.446	0.81:1.19	22774	Ras-related protein Rab-13 OS=Homo sapiens OX=9606 GN=RAB13 PE=1 SV=1	P51153
387	TRUE	Q9BTU6|P4K2A_HUMAN	5.75	12.32	5	5		587.461	348.99	1128.62	1197.22	1747.46	1143.28	941.829	779.312	0.60:0.35:1.15:1.22:1.78:1.16:0.96:0.79	815.573	1152.97	0.83:1.17	54022	Phosphatidylinositol 4-kinase type 2-alpha OS=Homo sapiens OX=9606 GN=PI4K2A PE=1 SV=1	Q9BTU6
320	TRUE	P04899|GNAI2_HUMAN	5.13	21.97	11	6	Oxidation (M)	2317.8	2862.74	7396.34	6652.78	8129.25	9885.76	4323.23	4644.65	0.40:0.50:1.28:1.15:1.41:1.71:0.75:0.80	4807.41	6745.72	0.83:1.17	40451	Guanine nucleotide-binding protein G(i) subunit alpha-2 OS=Homo sapiens OX=9606 GN=GNAI2 PE=1 SV=3	P04899
903	TRUE	P07602|SAP_HUMAN	4.06	2.48	1	1		104.154	144.32	373.107	369.719	506.576	548.551	153.998	249.97	0.34:0.47:1.22:1.21:1.65:1.79:0.50:0.82	247.825	364.774	0.81:1.19	58113	Prosaposin OS=Homo sapiens OX=9606 GN=PSAP PE=1 SV=2	P07602
1464	TRUE	Q6ZUX7|LHPL2_HUMAN	6.47	10.96	1	1		64.2832	123.114	263.244	238.752	362.359	304.793	174.457	192.799	0.30:0.57:1.22:1.11:1.68:1.41:0.81:0.89	172.348	258.602	0.80:1.20	24486	LHFPL tetraspan subfamily member 2 protein OS=Homo sapiens OX=9606 GN=LHFPL2 PE=1 SV=2	Q6ZUX7
514	TRUE	P20340|RAB6A_HUMAN	9.38	23.56	4	4	Oxidation (M)	666.196	1077.17	2032.87	2752.82	2150.98	2854.16	2414.55	3025.4	0.31:0.51:0.96:1.30:1.01:1.35:1.14:1.43	1632.26	2611.27	0.77:1.23	23593	Ras-related protein Rab-6A OS=Homo sapiens OX=9606 GN=RAB6A PE=1 SV=3	P20340
1262	TRUE	Q9UPP2|IQEC3_HUMAN	9.65	0.93	1	1	Acetylation (N-term)	5684.97	18986.2	15985.3	14036.2	19449.2	28417.8	19337	19497.7	0.32:1.07:0.90:0.79:1.10:1.61:1.09:1.10	13673.2	21675.4	0.77:1.23	127621	IQ motif and SEC7 domain-containing protein 3 OS=Homo sapiens OX=9606 GN=IQSEC3 PE=2 SV=3	Q9UPP2
419	TRUE	Q15084|PDIA6_HUMAN	5.22	9.77	3	3		79.9013	77.2525	383.742	492.096	253.688	163.449	656.318	677.215	0.23:0.22:1.10:1.41:0.73:0.47:1.89:1.95	314.153	486.31	0.78:1.22	48121	Protein disulfide-isomerase A6 OS=Homo sapiens OX=9606 GN=PDIA6 PE=1 SV=1	Q15084
1050	TRUE	Q7Z403|TMC6_HUMAN	4.88	4.47	3	3	Oxidation (M)	142.89	391.167	920.216	1102.51	661.982	1645.61	793.036	609.188	0.18:0.50:1.17:1.41:0.85:2.10:1.01:0.78	738.344	927.453	0.89:1.11	90045	Transmembrane channel-like protein 6 OS=Homo sapiens OX=9606 GN=TMC6 PE=1 SV=2	Q7Z403
273	TRUE	Q96TA1|NIBA2_HUMAN	27.14	9.25	5	5	Oxidation (M)	779.308	796.518	849.498	1097.65	1507.43	1560.3	1297.61	1308	0.68:0.69:0.74:0.95:1.31:1.36:1.13:1.14	880.744	1418.33	0.77:1.23	84138	Protein Niban 2 OS=Homo sapiens OX=9606 GN=NIBAN2 PE=1 SV=3	Q96TA1
807	TRUE	Q9Y4G6|TLN2_HUMAN	2.31	0.35	1	1		167.197	63.6411	1442.24	795.436	278.199	120.038	2140.28	1691.74	0.20:0.08:1.72:0.95:0.33:0.14:2.56:2.02	617.129	1057.56	0.74:1.26	271613	Talin-2 OS=Homo sapiens OX=9606 GN=TLN2 PE=1 SV=4	Q9Y4G6
342	TRUE	P63096|GNAI1_HUMAN	3.77	13.56	9	3		668.179	2314.19	2364.17	2397.89	3142.95	5205.59	1534.18	1563.65	0.28:0.96:0.99:1.00:1.31:2.17:0.64:0.65	1991.38	2861.59	0.82:1.18	40361	Guanine nucleotide-binding protein G(i) subunit alpha-1 OS=Homo sapiens OX=9606 GN=GNAI1 PE=1 SV=2	P63096
496	TRUE	P11413|G6PD_HUMAN	19.13	11.07	4	4		534.98	430.943	661.4	647.801	918.688	724.706	1217.37	960.14	0.70:0.57:0.87:0.85:1.21:0.95:1.60:1.26	568.781	955.225	0.75:1.25	59257	Glucose-6-phosphate 1-dehydrogenase OS=Homo sapiens OX=9606 GN=G6PD PE=1 SV=4	P11413
36	TRUE	P35222|CTNB1_HUMAN	2.48	16.39	15	10	Oxidation (M)	1196.76	1264.73	3029.39	3178.44	5621.44	3399.99	1565.14	1378.07	0.46:0.49:1.17:1.23:2.18:1.32:0.61:0.53	2196.64	2991.16	0.85:1.15	85497	Catenin beta-1 OS=Homo sapiens OX=9606 GN=CTNNB1 PE=1 SV=1	P35222
246	TRUE	Q6NSJ5|LRC8E_HUMAN	6.79	1.63	1	1		0	0	122.01	125.09	114.412	112.997	90.0307	0	0.00:0.00:1.73:1.77:1.62:1.60:1.28:0.00	123.55	105.813	1.08:0.92	90247	Volume-regulated anion channel subunit LRRC8E OS=Homo sapiens OX=9606 GN=LRRC8E PE=1 SV=2	Q6NSJ5
1	TRUE	Q15149|PLEC_HUMAN	6.18	6.55	36	26	Acetylation (N-term)	7700.8	7517.21	2291.16	1852.15	10103.1	13283.4	4601.52	4551.88	1.19:1.16:0.35:0.29:1.56:2.05:0.71:0.70	4840.33	8134.97	0.75:1.25	531791	Plectin OS=Homo sapiens OX=9606 GN=PLEC PE=1 SV=3	Q15149
291	TRUE	Q8N4S9|MALD2_HUMAN	7.83	8.24	4	4	Oxidation (M)	319.333	356.696	820.169	830.07	1013.55	1128.02	686.674	638.332	0.44:0.49:1.13:1.15:1.40:1.56:0.95:0.88	581.567	866.644	0.80:1.20	64168	MARVEL domain-containing protein 2 OS=Homo sapiens OX=9606 GN=MARVELD2 PE=1 SV=2	Q8N4S9

## Sheet: Total Area Normalization
Protein Group	Top	Accession	Significance	Coverage (%)	#Peptides	#Unique	PTM	Description	Myc_EV_2-2 Area	Myc_EV_2-1 Area	Myc_EV_1-2 Area	Myc_EV_1-1 Area	Control_EV_2-2 Area	Control_EV_2-1 Area	Control_EV_1-2 Area	Control_EV_1-1 Area	Myc/EV
2	TRUE	Q09666|AHNK_HUMAN	4.6	9.1	36	36	Acetylation (N-term); Oxidation (M)	Neuroblast differentiation-associated protein AHNAK OS=Homo sapiens OX=9606 GN=AHNAK PE=1 SV=2	137790	136880	213813	210861	93929	88837.3	62215.5	79571.1	2.15479
324	TRUE	Q13733|AT1A4_HUMAN	3.82	1.46	7	1		Sodium/potassium-transporting ATPase subunit alpha-4 OS=Homo sapiens OX=9606 GN=ATP1A4 PE=1 SV=3	182864	190390	105831	68006	98613	143934	90564.1	53949	1.41345
5	TRUE	P04264|K2C1_HUMAN	13.18	69.1	118	102	Acetylation (N-term); Carbamidomethylation; Oxidation (M)	Keratin, type II cytoskeletal 1 OS=Homo sapiens OX=9606 GN=KRT1 PE=1 SV=6	59427.2	59453.1	47624.8	48467.2	53871.3	54488.2	160143	168769	0.491621
114	TRUE	O95714|HERC2_HUMAN	21.91	0.19	1	1		E3 ubiquitin-protein ligase HERC2 OS=Homo sapiens OX=9606 GN=HERC2 PE=1 SV=2	70406.8	63000.7	47322.9	60768	20696.2	30876.2	18063.3	15324.4	2.84249
21	TRUE	P02751|FINC_HUMAN	24.81	35.04	76	76	Carbamidomethylation; Oxidation (M)	Fibronectin OS=Homo sapiens OX=9606 GN=FN1 PE=1 SV=5	66470.7	65137	74931.8	75793.5	228.945	702.209	2559.91	3759.38	38.9401
20	TRUE	P35908|K22E_HUMAN	35.27	69.64	71	49	Oxidation (M)	Keratin, type II cytoskeletal 2 epidermal OS=Homo sapiens OX=9606 GN=KRT2 PE=1 SV=2	25017.8	24469	25777.3	26044.8	48887.1	44671.6	43495.1	45054.4	0.556312
782	TRUE	Q9P1W3|CSC1_HUMAN	7.75	1.86	4	4	Acetylation (N-term); Oxidation (M)	Calcium permeable stress-gated cation channel 1 OS=Homo sapiens OX=9606 GN=TMEM63C PE=2 SV=1	58016.6	57907.9	18638	19295.6	40026.2	42015.1	19928.3	20896.5	1.25224
120	TRUE	P06702|S10A9_HUMAN	3.92	91.23	26	26	Acetylation (N-term); Oxidation (M)	Protein S100-A9 OS=Homo sapiens OX=9606 GN=S100A9 PE=1 SV=1	2933.88	3119.64	1769.82	1849.54	232.693	731.149	102194	106486	0.0461397
34	TRUE	P13645|K1C10_HUMAN	70.14	59.42	53	50	Acetylation (N-term); Carbamidomethylation; Oxidation (M)	Keratin, type I cytoskeletal 10 OS=Homo sapiens OX=9606 GN=KRT10 PE=1 SV=6	26336.1	26909	19559.8	20506.9	36924.7	35328.6	23195.8	24200.2	0.779878
25	TRUE	P08195|4F2_HUMAN	17.31	50.79	43	43	Oxidation (M)	4F2 cell-surface antigen heavy chain OS=Homo sapiens OX=9606 GN=SLC3A2 PE=1 SV=3	16507.2	16394.1	22353.4	23092.3	50267.1	49786.7	15494.6	16473.4	0.59344
8	TRUE	P13647|K2C5_HUMAN	12.74	50.51	64	47	Acetylation (N-term); Carbamidomethylation; Oxidation (M)	Keratin, type II cytoskeletal 5 OS=Homo sapiens OX=9606 GN=KRT5 PE=1 SV=3	3824.85	3744.45	4520.33	4055.3	5169.66	5047.01	52190.8	52857.2	0.140068
81	TRUE	P07355|ANXA2_HUMAN	8.57	61.65	25	25	Carbamidomethylation; Oxidation (M)	Annexin A2 OS=Homo sapiens OX=9606 GN=ANXA2 PE=1 SV=2	12519.6	13642.1	16059.3	20670.7	13632.4	14284.1	11705.3	13725.3	1.17892
87	TRUE	P05556|ITB1_HUMAN	1.93	20.68	18	18	Oxidation (M)	Integrin beta-1 OS=Homo sapiens OX=9606 GN=ITGB1 PE=1 SV=2	11411.4	11236.3	17892.9	18570.1	22848.7	21940.1	4958.18	4623.96	1.08717
37	TRUE	P08727|K1C19_HUMAN	9.49	25	18	15	Oxidation (M)	Keratin, type I cytoskeletal 19 OS=Homo sapiens OX=9606 GN=KRT19 PE=1 SV=4	750.798	710.183	778.364	959.778	554.453	882.608	42021.1	41002.4	0.0378771
169	TRUE	Q08431|MFGM_HUMAN	31.86	54.01	21	21	Oxidation (M)	Lactadherin OS=Homo sapiens OX=9606 GN=MFGE8 PE=1 SV=3	1968.99	2003.72	3916.25	4114	29255.5	26002.5	8877.28	10189.9	0.161492
453	TRUE	P13726|TF_HUMAN	9.65	25.08	7	7		Tissue factor OS=Homo sapiens OX=9606 GN=F3 PE=1 SV=1	6227.18	6199.95	8137.54	8722.41	24694.5	24121.4	3884.41	4109.97	0.515524
50	TRUE	P05023|AT1A1_HUMAN	1.08	27.66	38	25	Carbamidomethylation; Oxidation (M)	Sodium/potassium-transporting ATPase subunit alpha-1 OS=Homo sapiens OX=9606 GN=ATP1A1 PE=1 SV=1	9168.51	9094.65	12495.6	12535.2	12035.2	10855.2	2925.38	2839.79	1.51084
261	TRUE	P53985|MOT1_HUMAN	1.54	14.6	11	11	Oxidation (M)	Monocarboxylate transporter 1 OS=Homo sapiens OX=9606 GN=SLC16A1 PE=1 SV=3	6081.52	6990.24	9708.82	9728.47	16160.2	16021.8	2181.33	2002.88	0.893937
10	TRUE	P16144|ITB4_HUMAN	13.51	25.3	41	41	Carbamidomethylation; Oxidation (M)	Integrin beta-4 OS=Homo sapiens OX=9606 GN=ITGB4 PE=1 SV=5	4699.42	4497.11	8835.25	8998.5	15119.4	15369	5104.92	5512.27	0.657581
29	TRUE	P23229|ITA6_HUMAN	13.24	38.23	33	33	Carbamidomethylation; Oxidation (M)	Integrin alpha-6 OS=Homo sapiens OX=9606 GN=ITGA6 PE=1 SV=5	4322.05	4200.98	7135.53	7176.88	15394.2	13628	4050.14	4156.98	0.613371
69	TRUE	P26006|ITA3_HUMAN	10.8	28.16	23	23	Carbamidomethylation; Oxidation (M)	Integrin alpha-3 OS=Homo sapiens OX=9606 GN=ITGA3 PE=1 SV=5	4791.07	4907.61	7856.36	8103.35	13429	12891.4	4196.13	3848.85	0.746634
148	TRUE	P16070|CD44_HUMAN	22.65	8.09	6	6	Oxidation (M)	CD44 antigen OS=Homo sapiens OX=9606 GN=CD44 PE=1 SV=3	9702.07	9800.26	14718.7	16618.3	3026.32	2926.24	627.402	725.639	6.95895
374	TRUE	P05109|S10A8_HUMAN	6.67	51.61	10	10	Carbamidomethylation; Oxidation (M)	Protein S100-A8 OS=Homo sapiens OX=9606 GN=S100A8 PE=1 SV=1	457.401	424.927	276.369	552.575	197.86	157.159	28082.2	27028.3	0.0308529
590	TRUE	Q14624|ITIH4_HUMAN	8.49	9.68	7	7	Oxidation (M)	Inter-alpha-trypsin inhibitor heavy chain H4 OS=Homo sapiens OX=9606 GN=ITIH4 PE=1 SV=4	6337.51	6030.48	7885.97	8021.87	6556.25	6929.15	4508.76	4616.42	1.25056
49	TRUE	P17301|ITA2_HUMAN	5.88	28.62	24	24	Acetylation (N-term); Carbamidomethylation; Oxidation (M)	Integrin alpha-2 OS=Homo sapiens OX=9606 GN=ITGA2 PE=1 SV=1	7099.25	8709.32	9408.33	8231.77	6853.05	4198.83	3305.53	735.283	2.21622
338	TRUE	O14672|ADA10_HUMAN	3.79	12.03	7	7	Oxidation (M)	Disintegrin and metalloproteinase domain-containing protein 10 OS=Homo sapiens OX=9606 GN=ADAM10 PE=1 SV=1	5921.04	5606.16	6177.8	6327.96	9621.83	9137.94	2275.33	2340.39	1.02813
680	TRUE	P0CG48|UBC_HUMAN	11.12	5.84	4	4		Polyubiquitin-C OS=Homo sapiens OX=9606 GN=UBC PE=1 SV=3	7297.97	7020.11	4452.92	4455.89	8314.98	6465.21	2793.75	3084.16	1.12435
680	TRUE	P0CG47|UBB_HUMAN	11.12	17.47	4	4		Polyubiquitin-B OS=Homo sapiens OX=9606 GN=UBB PE=1 SV=1	7297.97	7020.11	4452.92	4455.89	8314.98	6465.21	2793.75	3084.16	1.12435
680	TRUE	P62979|RS27A_HUMAN	11.12	25.64	4	4		Ubiquitin-40S ribosomal protein S27a OS=Homo sapiens OX=9606 GN=RPS27A PE=1 SV=2	7297.97	7020.11	4452.92	4455.89	8314.98	6465.21	2793.75	3084.16	1.12435
680	TRUE	P62987|RL40_HUMAN	11.12	31.25	4	4		Ubiquitin-60S ribosomal protein L40 OS=Homo sapiens OX=9606 GN=UBA52 PE=1 SV=2	7297.97	7020.11	4452.92	4455.89	8314.98	6465.21	2793.75	3084.16	1.12435
3	TRUE	P15924|DESP_HUMAN	10.15	43.33	135	135	Carbamidomethylation; Oxidation (M)	Desmoplakin OS=Homo sapiens OX=9606 GN=DSP PE=1 SV=3	633.104	447.599	460.433	480.767	418.056	566.255	18378.1	19518.6	0.0520022
229	TRUE	Q9Y624|JAM1_HUMAN	2.76	28.43	9	9	Oxidation (M)	Junctional adhesion molecule A OS=Homo sapiens OX=9606 GN=F11R PE=1 SV=1	7434.81	7053.7	6223.7	5900.09	1893.36	5127.94	3563.5	3248.6	1.92377
336	TRUE	P27105|STOM_HUMAN	8.92	52.43	9	9	Carbamidomethylation; Oxidation (M)	Stomatin OS=Homo sapiens OX=9606 GN=STOM PE=1 SV=3	4093.22	3745.5	3867.01	4270.21	10538.2	9254.71	2065.79	1939.29	0.671316
298	TRUE	Q15758|AAAT_HUMAN	1.63	18.67	10	10	Acetylation (N-term); Oxidation (M)	Neutral amino acid transporter B(0) OS=Homo sapiens OX=9606 GN=SLC1A5 PE=1 SV=2	4562.08	4549.55	7441.56	7960.5	5949.23	5467.95	1567.19	1643.77	1.67579
443	TRUE	O00186|STXB3_HUMAN	1.24	17.57	9	9	Oxidation (M)	Syntaxin-binding protein 3 OS=Homo sapiens OX=9606 GN=STXBP3 PE=1 SV=2	2825.42	207.151	6109.51	7423.75	20858.8	341.383	227.055	352.784	0.760596
117	TRUE	Q8WUM4|PDC6I_HUMAN	10.46	34.79	27	27	Oxidation (M)	Programmed cell death 6-interacting protein OS=Homo sapiens OX=9606 GN=PDCD6IP PE=1 SV=1	6016.8	6076.05	7649.85	7035.78	2825.3	4101.92	2278.01	1992.92	2.39133
95	TRUE	P04406|G3P_HUMAN	12.08	42.09	13	13	Carbamidomethylation; Oxidation (M)	Glyceraldehyde-3-phosphate dehydrogenase OS=Homo sapiens OX=9606 GN=GAPDH PE=1 SV=3	2571.12	2508.18	2235.19	1513.05	2070.69	2415.57	11765.2	11470	0.318437
641	TRUE	Q9H4G0|E41L1_HUMAN	2.78	2.27	2	2		Band 4.1-like protein 1 OS=Homo sapiens OX=9606 GN=EPB41L1 PE=1 SV=2	9296.23	9003.76	2603.13	2171.62	6755.82	1546.84	1338.76	1321.21	2.10485
236	TRUE	P04439|HLAA_HUMAN	5.2	18.36	11	6		HLA class I histocompatibility antigen, A alpha chain OS=Homo sapiens OX=9606 GN=HLA-A PE=1 SV=2	3137.71	2939.89	4920.31	5132.68	7972.99	6120.94	1735.53	1783.18	0.915853
318	TRUE	Q01650|LAT1_HUMAN	13.05	15.19	5	5	Carbamidomethylation; Oxidation (M)	Large neutral amino acids transporter small subunit 1 OS=Homo sapiens OX=9606 GN=SLC7A5 PE=1 SV=2	2929.73	2678.96	2704.65	2963.12	10678.9	7845.67	1704.42	1927.59	0.508943
737	TRUE	P11277|SPTB1_HUMAN	2.99	0.42	1	1		Spectrin beta chain, erythrocytic OS=Homo sapiens OX=9606 GN=SPTB PE=1 SV=5	6136.23	5925.47	3384.8	4590.84	3562.3	4208.28	2362.26	2545.41	1.58045
516	TRUE	P01040|CYTA_HUMAN	12.93	75.51	7	7		Cystatin-A OS=Homo sapiens OX=9606 GN=CSTA PE=1 SV=1	758.574	740.968	347.338	461.859	758.838	815.887	13661.9	14031	0.0788838
38	TRUE	P14923|PLAK_HUMAN	23.21	30.2	22	17	Oxidation (M)	Junction plakoglobin OS=Homo sapiens OX=9606 GN=JUP PE=1 SV=3	859.591	1136.66	1092.45	1120.78	3023.83	2934.68	10761.1	10457.7	0.154889
379	TRUE	Q96FQ6|S10AG_HUMAN	20.78	64.08	8	8	Oxidation (M)	Protein S100-A16 OS=Homo sapiens OX=9606 GN=S100A16 PE=1 SV=1	2184.32	2111.77	2914.44	3022.96	7167.53	8175.09	2558.18	2510.21	0.501371
149	TRUE	Q08554|DSC1_HUMAN	11.7	29.64	25	25	Carbamidomethylation; Oxidation (M)	Desmocollin-1 OS=Homo sapiens OX=9606 GN=DSC1 PE=1 SV=2	898.124	925.378	537.476	264.67	773.345	662.412	11945.7	11917.4	0.103785
510	TRUE	O15427|MOT4_HUMAN	3.52	10.97	4	4		Monocarboxylate transporter 4 OS=Homo sapiens OX=9606 GN=SLC16A3 PE=1 SV=1	2603.13	2619.68	3714.88	4046.93	7031.18	4851.02	1222.4	1136.76	0.911754
260	TRUE	P02787|TRFE_HUMAN	3.52	23.64	15	15	Oxidation (M)	Serotransferrin OS=Homo sapiens OX=9606 GN=TF PE=1 SV=3	3158.94	2971.93	4200.73	4304.02	3843.02	3157.78	1947.64	1715.57	1.37243
86	TRUE	P06733|ENOA_HUMAN	15.64	54.84	18	18	Oxidation (M)	Alpha-enolase OS=Homo sapiens OX=9606 GN=ENO1 PE=1 SV=2	1124.3	1124.41	1579.22	1390.36	1768.85	2167.14	9960.92	5976.12	0.262581
137	TRUE	Q02413|DSG1_HUMAN	9.73	23.45	23	23	Oxidation (M)	Desmoglein-1 OS=Homo sapiens OX=9606 GN=DSG1 PE=1 SV=2	261.856	1025.36	202.044	964.26	508.279	462.021	9836.93	10651.6	0.114336
1262	TRUE	Q9UPP2|IQEC3_HUMAN	9.65	0.93	1	1	Acetylation (N-term)	IQ motif and SEC7 domain-containing protein 3 OS=Homo sapiens OX=9606 GN=IQSEC3 PE=2 SV=3	1420.87	4643.57	2827.39	2548.06	3201.46	4045.34	1906.28	2035.53	1.02246
18	TRUE	Q00610|CLH1_HUMAN	18.48	29.61	46	35	Carbamidomethylation; Oxidation (M)	Clathrin heavy chain 1 OS=Homo sapiens OX=9606 GN=CLTC PE=1 SV=5	3524.75	3239.06	4896.05	6052.2	1175.89	1403.71	922.682	960.611	3.96874
346	TRUE	Q03135|CAV1_HUMAN	4.52	31.46	4	4		Caveolin-1 OS=Homo sapiens OX=9606 GN=CAV1 PE=1 SV=4	1760.08	2194.16	5738.8	6000.61	1974.01	2724.24	682.443	616.475	2.61684
219	TRUE	Q9Y6M7|S4A7_HUMAN	5.43	7	7	7	Oxidation (M)	Sodium bicarbonate cotransporter 3 OS=Homo sapiens OX=9606 GN=SLC4A7 PE=1 SV=2	8099.98	7520.81	339.406	286.729	5218.47	76.2561	64.9226	65.3045	2.99485
736	TRUE	Q99808|S29A1_HUMAN	1.83	10.96	4	4		Equilibrative nucleoside transporter 1 OS=Homo sapiens OX=9606 GN=SLC29A1 PE=1 SV=3	4684.99	4259.38	835.979	4597.1	2564.4	633.876	1700.18	1372.65	2.29265
607	TRUE	Q8N5I2|ARRD1_HUMAN	3.21	31.64	8	8		Arrestin domain-containing protein 1 OS=Homo sapiens OX=9606 GN=ARRDC1 PE=1 SV=1	3980.23	4047.83	2592.38	2221.23	2948.53	3122.88	610.549	758.685	1.72588
397	TRUE	O95297|MPZL1_HUMAN	0.45	27.14	9	9		Myelin protein zero-like protein 1 OS=Homo sapiens OX=9606 GN=MPZL1 PE=1 SV=1	1820.41	1733.55	3513.07	3585.48	3790.11	3792.61	468.733	940.977	1.18461
916	TRUE	Q9HCL2|GPAT1_HUMAN	0.99	1.45	1	1	Carbamidomethylation	Glycerol-3-phosphate acyltransferase 1, mitochondrial OS=Homo sapiens OX=9606 GN=GPAM PE=1 SV=3	3949.04	4711.98	1423.54	1848.08	3179.69	2179.72	746.964	832.842	1.7196
284	TRUE	Q8TD16|BICD2_HUMAN	22.56	1.21	1	1		Protein bicaudal D homolog 2 OS=Homo sapiens OX=9606 GN=BICD2 PE=1 SV=1	9496.79	9110.22	0	0	0	0	15.5541	6.80372	832.236
102	TRUE	P06756|ITAV_HUMAN	0.35	20.32	18	18	Oxidation (M)	Integrin alpha-V OS=Homo sapiens OX=9606 GN=ITGAV PE=1 SV=2	1446.79	1545.43	4052.29	4176.16	3126.3	2700.43	714.619	632.169	1.56418
165	TRUE	P07996|TSP1_HUMAN	29.19	13.85	12	12	Oxidation (M)	Thrombospondin-1 OS=Homo sapiens OX=9606 GN=THBS1 PE=1 SV=2	2638.76	3015.4	5817.69	5147.59	469.516	587.477	225.164	348.16	10.194
98	TRUE	P23634|AT2B4_HUMAN	9.42	15.95	24	15	Carbamidomethylation; Oxidation (M)	Plasma membrane calcium-transporting ATPase 4 OS=Homo sapiens OX=9606 GN=ATP2B4 PE=1 SV=2	847.827	815.427	3052.8	3177.97	3382.32	3551.04	1544.37	1630.87	0.780922
245	TRUE	P04083|ANXA1_HUMAN	18.42	54.05	15	15	Oxidation (M)	Annexin A1 OS=Homo sapiens OX=9606 GN=ANXA1 PE=1 SV=2	320.635	468.155	843.34	968.193	1425.65	1537.35	5910.95	5941.52	0.175514
608	TRUE	P05026|AT1B1_HUMAN	1.28	16.17	4	4	Carbamidomethylation	Sodium/potassium-transporting ATPase subunit beta-1 OS=Homo sapiens OX=9606 GN=ATP1B1 PE=1 SV=1	2382.02	1729.55	3293.25	2723.21	3095.53	2901.89	680.223	396.254	1.43175
48	TRUE	P35221|CTNA1_HUMAN	8.92	32.56	22	18	Acetylation (N-term); Carbamidomethylation; Oxidation (M)	Catenin alpha-1 OS=Homo sapiens OX=9606 GN=CTNNA1 PE=1 SV=1	1006.11	754.683	2182.76	2233.9	3862.5	3971.28	918.518	916.235	0.638922
58	TRUE	P11142|HSP7C_HUMAN	17.8	32.04	25	16	Oxidation (M)	Heat shock cognate 71 kDa protein OS=Homo sapiens OX=9606 GN=HSPA8 PE=1 SV=1	1558.16	1437.36	1663.77	1776.83	1847.83	1955.84	2734.26	2871.68	0.683995
35	TRUE	Q6YHK3|CD109_HUMAN	1.38	28.79	29	29	Carbamidomethylation; Oxidation (M)	CD109 antigen OS=Homo sapiens OX=9606 GN=CD109 PE=1 SV=2	1011.4	1151.68	3032.43	3093.31	2234.52	3182.5	610.651	646.169	1.24199
45	TRUE	P15144|AMPN_HUMAN	52.82	28.02	23	23	Oxidation (M)	Aminopeptidase N OS=Homo sapiens OX=9606 GN=ANPEP PE=1 SV=4	2620.43	2819.61	4578.76	4626.42	60.1691	60.4894	39.4676	36.9837	74.2998
47	TRUE	P68104|EF1A1_HUMAN	5.35	36.8	15	15	Carbamidomethylation; Oxidation (M)	Elongation factor 1-alpha 1 OS=Homo sapiens OX=9606 GN=EEF1A1 PE=1 SV=1	857.88	1007.26	2330	2350.46	820.053	1145.57	3132.73	2943.13	0.813978
31	TRUE	P13639|EF2_HUMAN	5.3	28.9	24	24	Carbamidomethylation; Oxidation (M)	Elongation factor 2 OS=Homo sapiens OX=9606 GN=EEF2 PE=1 SV=4	778.842	705.523	2297.79	2146.82	819.404	767.641	3384.39	3607.07	0.691143
104	TRUE	P33527|MRP1_HUMAN	4.78	23.19	24	24	Oxidation (M)	Multidrug resistance-associated protein 1 OS=Homo sapiens OX=9606 GN=ABCC1 PE=1 SV=3	1989.28	2525.58	2826.84	2199.54	1722.36	1551.76	563.005	1048.33	1.95299
883	TRUE	P61769|B2MG_HUMAN	8.12	16.81	2	2		Beta-2-microglobulin OS=Homo sapiens OX=9606 GN=B2M PE=1 SV=1	1056	886.555	2035.1	2568.22	2518.55	2892.38	1039.17	990.698	0.879726
128	TRUE	P04792|HSPB1_HUMAN	19.78	65.85	14	14	Oxidation (M)	Heat shock protein beta-1 OS=Homo sapiens OX=9606 GN=HSPB1 PE=1 SV=2	239.275	219.361	245.322	289.859	716.461	768.135	5601.43	5693.76	0.0777648
637	TRUE	P35613|BASI_HUMAN	14.28	15.32	4	4	Oxidation (M)	Basigin OS=Homo sapiens OX=9606 GN=BSG PE=1 SV=2	902.601	953.429	1606.92	1678.21	3258.04	3283.46	982.939	1031.88	0.600862
868	TRUE	P21926|CD9_HUMAN	24.36	4.39	2	2		CD9 antigen OS=Homo sapiens OX=9606 GN=CD9 PE=1 SV=4	1190.72	1064.56	1277.91	1282.88	3383.53	2973.61	1063.51	1282.85	0.55335
286	TRUE	P60903|S10AA_HUMAN	2.59	37.11	3	3	Oxidation (M)	Protein S100-A10 OS=Homo sapiens OX=9606 GN=S100A10 PE=1 SV=2	172.009	637.423	4077.81	3688.26	1126.1	1530.34	1044.31	974.317	1.83431
267	TRUE	P09211|GSTP1_HUMAN	26.16	49.52	8	8	Oxidation (M)	Glutathione S-transferase P OS=Homo sapiens OX=9606 GN=GSTP1 PE=1 SV=2	1824.58	1654.36	494.366	561.923	2338.45	2277.86	1892.21	2205.06	0.520478
51	TRUE	P29317|EPHA2_HUMAN	13.47	20.59	17	15	Oxidation (M)	Ephrin type-A receptor 2 OS=Homo sapiens OX=9606 GN=EPHA2 PE=1 SV=2	463.494	937.151	1695.21	1727.15	3139.97	2978.63	1154.87	1125.25	0.574254
867	TRUE	Q8NG11|TSN14_HUMAN	25.1	17.78	4	4	Carbamidomethylation	Tetraspanin-14 OS=Homo sapiens OX=9606 GN=TSPAN14 PE=1 SV=1	1105.96	1048.97	1074.1	981.952	3367.69	3380.03	1041.77	1079.24	0.474812
344	TRUE	P54709|AT1B3_HUMAN	0.19	30.11	8	8	Oxidation (M)	Sodium/potassium-transporting ATPase subunit beta-3 OS=Homo sapiens OX=9606 GN=ATP1B3 PE=1 SV=1	1282.09	1221.36	2651.76	2576.91	2017.3	2046.43	536.618	648.534	1.4731
451	TRUE	Q07864|DPOE1_HUMAN	0.42	0.52	1	1	Acetylation (N-term); Oxidation (M)	DNA polymerase epsilon catalytic subunit A OS=Homo sapiens OX=9606 GN=POLE PE=1 SV=5	2735.97	2650.42	1347.25	1348.28	1796.15	1358.9	793.305	888.993	1.67073
432	TRUE	Q969P0|IGSF8_HUMAN	0.36	21.53	9	9	Oxidation (M)	Immunoglobulin superfamily member 8 OS=Homo sapiens OX=9606 GN=IGSF8 PE=1 SV=1	1378.81	1662.95	1725.21	2467.99	1772.49	2269.34	499.487	683.064	1.38485
960	TRUE	P20645|MPRD_HUMAN	4.01	7.58	2	2	Carbamidomethylation	Cation-dependent mannose-6-phosphate receptor OS=Homo sapiens OX=9606 GN=M6PR PE=1 SV=1	5833.02	5322.69	116.039	78.1269	489.972	475.797	36.669	44.0962	10.8452
304	TRUE	Q8WTV0|SCRB1_HUMAN	3.3	11.05	6	6	Oxidation (M)	Scavenger receptor class B member 1 OS=Homo sapiens OX=9606 GN=SCARB1 PE=1 SV=1	1725.94	1577.65	2181.28	2400.69	1969.95	1700.9	341.371	482.711	1.75432
319	TRUE	Q8IWA5|CTL2_HUMAN	11.4	16.57	12	12	Acetylation (N-term); Carbamidomethylation	Choline transporter-like protein 2 OS=Homo sapiens OX=9606 GN=SLC44A2 PE=1 SV=3	560.172	985.635	728.93	924.148	4001.76	4131.66	502.938	499.145	0.35016
483	TRUE	O00560|SDCB1_HUMAN	6.97	52.01	8	8	Carbamidomethylation; Oxidation (M)	Syntenin-1 OS=Homo sapiens OX=9606 GN=SDCBP PE=1 SV=1	2026.75	1944	2178.79	2198.04	1535.61	1685.1	340.121	355.208	2.13164
54	TRUE	P08238|HS90B_HUMAN	2.5	16.71	22	11	Oxidation (M)	Heat shock protein HSP 90-beta OS=Homo sapiens OX=9606 GN=HSP90AB1 PE=1 SV=4	1384.68	1419.13	2507.37	2850.31	1037.8	1347.65	799.601	752.488	2.07274
17	TRUE	Q9NZM1|MYOF_HUMAN	1.38	28.14	46	46	Carbamidomethylation; Oxidation (M)	Myoferlin OS=Homo sapiens OX=9606 GN=MYOF PE=1 SV=1	1121.31	1028.35	2598.76	2846.66	1490.55	1384.06	543.765	522.705	1.92716
159	TRUE	P20930|FILA_HUMAN	12.97	2.91	11	11	Oxidation (M)	Filaggrin OS=Homo sapiens OX=9606 GN=FLG PE=1 SV=3	171.899	183.908	162.369	163.391	247.931	250.26	4503.99	5266.69	0.0663721
427	TRUE	P18564|ITB6_HUMAN	3.51	6.6	5	5		Integrin beta-6 OS=Homo sapiens OX=9606 GN=ITGB6 PE=1 SV=2	945.367	947.464	2700.76	2757.43	1488.89	1201.42	316.89	270.931	2.24244
384	TRUE	P11166|GTR1_HUMAN	5.13	10.57	7	7	Oxidation (M)	Solute carrier family 2, facilitated glucose transporter member 1 OS=Homo sapiens OX=9606 GN=SLC2A1 PE=1 SV=2	906.121	818.978	3099.15	2887.64	1227.32	1238.43	170.134	187.685	2.73125
322	TRUE	P08648|ITA5_HUMAN	2.79	18.4	13	13	Oxidation (M)	Integrin alpha-5 OS=Homo sapiens OX=9606 GN=ITGA5 PE=1 SV=2	1058.94	956.826	1203.01	1820.47	2677.71	1487.41	383.831	518.991	0.994338
743	TRUE	P0DOX5|IGG1_HUMAN	17.99	21.6	6	5	Acetylation (N-term); Carbamidomethylation	Immunoglobulin gamma-1 heavy chain OS=Homo sapiens OX=9606 PE=1 SV=2	819.876	718.772	619.583	637.64	988.951	938.922	2462.87	2636.35	0.39787
44	TRUE	P12814|ACTN1_HUMAN	25.9	21.86	18	14	Oxidation (M)	Alpha-actinin-1 OS=Homo sapiens OX=9606 GN=ACTN1 PE=1 SV=2	490.274	549.289	899.932	973.899	1785.85	1698.56	1650.17	1761.34	0.422481
1147	TRUE	Q13515|BFSP2_HUMAN	9.33	2.65	1	1	Oxidation (M)	Phakinin OS=Homo sapiens OX=9606 GN=BFSP2 PE=1 SV=1	660.719	631.595	761.597	773.733	562.229	559.914	2771.16	2739.27	0.426327
369	TRUE	Q8WUX1|S38A5_HUMAN	57.15	12.08	5	5	Acetylation (N-term); Oxidation (M)	Sodium-coupled neutral amino acid transporter 5 OS=Homo sapiens OX=9606 GN=SLC38A5 PE=1 SV=1	1844.37	1813.19	2397.42	2970.91	41.0577	30.4927	23.7953	27.4959	73.4759
1244	TRUE	P60033|CD81_HUMAN	3.61	8.47	2	2		CD81 antigen OS=Homo sapiens OX=9606 GN=CD81 PE=1 SV=1	675.375	497.149	2011.63	1718.44	1612.97	1496.03	443.635	658.9	1.16408
1	TRUE	Q15149|PLEC_HUMAN	6.18	6.55	36	26	Acetylation (N-term)	Plectin OS=Homo sapiens OX=9606 GN=PLEC PE=1 SV=3	1924.69	1838.53	405.248	336.229	1663.04	1890.92	453.627	475.208	1.00489
287	TRUE	Q04917|1433F_HUMAN	25.52	30.89	7	7	Oxidation (M)	14-3-3 protein eta OS=Homo sapiens OX=9606 GN=YWHAH PE=1 SV=4	449.266	425.86	838.726	855.205	1661.08	1573.14	1600.01	1579.61	0.400549
42	TRUE	O75051|PLXA2_HUMAN	13.02	15.52	32	24	Oxidation (M)	Plexin-A2 OS=Homo sapiens OX=9606 GN=PLXNA2 PE=1 SV=4	600.137	592.634	1051.01	1026.54	2155.69	2107.91	610.04	571.806	0.600561
728	TRUE	Q9UK41|VPS28_HUMAN	1.17	16.74	3	3	Oxidation (M)	Vacuolar protein sorting-associated protein 28 homolog OS=Homo sapiens OX=9606 GN=VPS28 PE=1 SV=1	1476.08	1582.1	1045.08	1086.88	1395.17	1409.9	295.453	385.614	1.4888
818	TRUE	P61225|RAP2B_HUMAN	16.5	22.95	5	3		Ras-related protein Rap-2b OS=Homo sapiens OX=9606 GN=RAP2B PE=1 SV=1	373.188	329.052	905.781	933.112	2406.19	2197.51	716.274	684.611	0.423199
91	TRUE	Q13740|CD166_HUMAN	5.4	16.98	8	8	Oxidation (M)	CD166 antigen OS=Homo sapiens OX=9606 GN=ALCAM PE=1 SV=2	948.382	841.634	2159.99	2084.18	976.164	843.351	313.897	250.271	2.53145
1006	TRUE	P48595|SPB10_HUMAN	4.38	6.55	3	3	Acetylation (N-term)	Serpin B10 OS=Homo sapiens OX=9606 GN=SERPINB10 PE=1 SV=1	1067.34	1179.09	1142.8	1341.53	682.738	894.747	988.814	1027.92	1.31621
863	TRUE	Q15517|CDSN_HUMAN	16.62	7.94	2	2	Oxidation (M)	Corneodesmosin OS=Homo sapiens OX=9606 GN=CDSN PE=1 SV=3	123.325	120.608	12.9343	273.604	341.819	359.968	3433.28	3572.6	0.0688237
695	TRUE	P60953|CDC42_HUMAN	24.25	31.41	6	6	Carbamidomethylation	Cell division control protein 42 homolog OS=Homo sapiens OX=9606 GN=CDC42 PE=1 SV=2	186.175	246.956	651.819	624.367	2077.77	2278.22	1068.24	1082.55	0.262698
358	TRUE	Q8WWI5|CTL1_HUMAN	13.01	12.48	7	7	Carbamidomethylation; Oxidation (M)	Choline transporter-like protein 1 OS=Homo sapiens OX=9606 GN=SLC44A1 PE=1 SV=1	496.764	337.586	410.197	492.378	2793.66	2963.62	298.778	333.837	0.271824
188	TRUE	Q9H223|EHD4_HUMAN	21.87	26.8	15	12	Oxidation (M)	EH domain-containing protein 4 OS=Homo sapiens OX=9606 GN=EHD4 PE=1 SV=1	682.968	585.301	414.944	1155.43	2060	1580.33	753.23	790.27	0.547595
842	TRUE	P27701|CD82_HUMAN	8.74	13.86	3	3	Oxidation (M)	CD82 antigen OS=Homo sapiens OX=9606 GN=CD82 PE=1 SV=1	178.908	563.606	1005.02	264.34	2822.17	2629.9	260.389	243.987	0.337764
78	TRUE	P02786|TFR1_HUMAN	0.92	25.53	16	16	Oxidation (M)	Transferrin receptor protein 1 OS=Homo sapiens OX=9606 GN=TFRC PE=1 SV=2	667.775	725.963	1784.85	1674.69	1238.14	1355.49	278.235	228.379	1.56545
410	TRUE	P01889|HLAB_HUMAN	22.7	9.39	7	2		HLA class I histocompatibility antigen, B alpha chain OS=Homo sapiens OX=9606 GN=HLA-B PE=1 SV=3	128.53	409.406	304.185	341.124	2776.83	2728.72	511.774	542.293	0.180383
440	TRUE	P51149|RAB7A_HUMAN	15.15	44.93	8	8	Oxidation (M)	Ras-related protein Rab-7a OS=Homo sapiens OX=9606 GN=RAB7A PE=1 SV=1	381.565	378.504	1085.09	1087.8	1434.52	1357.04	967.192	972.077	0.619968
450	TRUE	P25311|ZA2G_HUMAN	10.67	28.86	6	6	Oxidation (M)	Zinc-alpha-2-glycoprotein OS=Homo sapiens OX=9606 GN=AZGP1 PE=1 SV=2	261.88	266.394	221.813	235.27	248.063	225.485	3049.02	3069.12	0.149485
320	TRUE	P04899|GNAI2_HUMAN	5.13	21.97	11	6	Oxidation (M)	Guanine nucleotide-binding protein G(i) subunit alpha-2 OS=Homo sapiens OX=9606 GN=GNAI2 PE=1 SV=3	579.297	700.158	1308.23	1207.71	1338.13	1407.26	426.193	484.894	1.03799
423	TRUE	Q92597|NDRG1_HUMAN	0.74	22.34	6	6	Oxidation (M)	Protein NDRG1 OS=Homo sapiens OX=9606 GN=NDRG1 PE=1 SV=1	587.49	512.861	1765.53	1745.57	994.289	1022.68	388.036	421.271	1.63163
354	TRUE	P51148|RAB5C_HUMAN	9.07	27.31	7	4	Oxidation (M)	Ras-related protein Rab-5C OS=Homo sapiens OX=9606 GN=RAB5C PE=1 SV=2	519.645	510.582	1200.6	1163.15	1237.56	1399.62	560.26	604.159	0.892776
136	TRUE	Q86YZ3|HORN_HUMAN	11.05	6.42	12	12	Oxidation (M)	Hornerin OS=Homo sapiens OX=9606 GN=HRNR PE=1 SV=2	49.2667	26.4156	45.9588	45.0787	48.3118	53.7576	3375.17	3413.53	0.0241947
262	TRUE	O00468|AGRIN_HUMAN	17.38	8.8	13	13		Agrin OS=Homo sapiens OX=9606 GN=AGRN PE=1 SV=6	1272.91	1319.31	1302.79	1345.84	580.556	605.872	139.172	250.139	3.32597
1030	TRUE	Q01628|IFM3_HUMAN	29.18	30.83	2	2	Oxidation (M)	Interferon-induced transmembrane protein 3 OS=Homo sapiens OX=9606 GN=IFITM3 PE=1 SV=2	93.4403	60.3971	185.023	191.036	1743.04	3210.65	834.396	469.424	0.0846817
584	TRUE	P62873|GBB1_HUMAN	7.83	18.53	7	4	Acetylation (N-term); Carbamidomethylation	Guanine nucleotide-binding protein G(I)/G(S)/G(T) subunit beta-1 OS=Homo sapiens OX=9606 GN=GNB1 PE=1 SV=3	709.503	733.987	774.406	912.197	1789.13	999.899	373.303	416.281	0.874666
1330	TRUE	Q96PV0|SYGP1_HUMAN	0.69	0.82	1	1		Ras/Rap GTPase-activating protein SynGAP OS=Homo sapiens OX=9606 GN=SYNGAP1 PE=1 SV=4	1092.25	109.517	860.816	1728.43	61.9301	857.624	770.161	1176.39	1.3227
727	TRUE	Q9Y6M5|ZNT1_HUMAN	7.4	12.82	4	4		Zinc transporter 1 OS=Homo sapiens OX=9606 GN=SLC30A1 PE=1 SV=3	718.2	803.698	1551.14	1622.43	608.278	672.739	165.629	264.024	2.74481
426	TRUE	Q13641|TPBG_HUMAN	3.95	10.48	3	3	Oxidation (M)	Trophoblast glycoprotein OS=Homo sapiens OX=9606 GN=TPBG PE=1 SV=1	781.133	543.013	1366.85	1543.48	960.292	878.226	94.9747	176.951	2.00644
282	TRUE	P63092|GNAS2_HUMAN	7.38	31.98	9	9	Oxidation (M)	Guanine nucleotide-binding protein G(s) subunit alpha isoforms short OS=Homo sapiens OX=9606 GN=GNAS PE=1 SV=1	211.217	1053.33	404.403	875.506	1601.16	1438.84	307.328	318.208	0.694158
282	TRUE	Q5JWF2|GNAS1_HUMAN	7.38	12.15	9	9	Oxidation (M)	Guanine nucleotide-binding protein G(s) subunit alpha isoforms XLas OS=Homo sapiens OX=9606 GN=GNAS PE=1 SV=2	211.217	1053.33	404.403	875.506	1601.16	1438.84	307.328	318.208	0.694158
406	TRUE	P61204|ARF3_HUMAN	22.13	31.49	6	4	Oxidation (M)	ADP-ribosylation factor 3 OS=Homo sapiens OX=9606 GN=ARF3 PE=1 SV=2	446.974	488.511	741.746	699.68	1305.48	1232.19	634.482	651.145	0.621691
406	TRUE	P84077|ARF1_HUMAN	22.13	31.49	6	4	Oxidation (M)	ADP-ribosylation factor 1 OS=Homo sapiens OX=9606 GN=ARF1 PE=1 SV=2	446.974	488.511	741.746	699.68	1305.48	1232.19	634.482	651.145	0.621691
757	TRUE	P09758|TACD2_HUMAN	17.74	13	3	3		Tumor-associated calcium signal transducer 2 OS=Homo sapiens OX=9606 GN=TACSTD2 PE=1 SV=3	247.279	482.763	609.172	585.927	1735.93	1522.11	481.991	502.8	0.453741
589	TRUE	Q5ZPR3|CD276_HUMAN	0.25	13.11	4	4		CD276 antigen OS=Homo sapiens OX=9606 GN=CD276 PE=1 SV=1	749.428	688.294	1088.23	950.297	1100.49	1101.86	216.748	222.337	1.31604
328	TRUE	P17931|LEG3_HUMAN	10.26	19.6	4	4		Galectin-3 OS=Homo sapiens OX=9606 GN=LGALS3 PE=1 SV=5	369.334	238.697	328.773	372.46	225.371	396.773	2189.8	1974.64	0.273528
515	TRUE	P23528|COF1_HUMAN	22.61	46.39	6	6	Acetylation (N-term)	Cofilin-1 OS=Homo sapiens OX=9606 GN=CFL1 PE=1 SV=3	516.093	526.601	551.293	603.537	719.872	922.861	1094.14	1108.89	0.571415
80	TRUE	P07900|HS90A_HUMAN	5.61	11.89	18	7	Oxidation (M)	Heat shock protein HSP 90-alpha OS=Homo sapiens OX=9606 GN=HSP90AA1 PE=1 SV=5	516.365	458.185	1151.08	1154.55	854.244	786.472	572.606	524.991	1.19788
542	TRUE	Q9ULF5|S39AA_HUMAN	0.91	9.75	4	4		Zinc transporter ZIP10 OS=Homo sapiens OX=9606 GN=SLC39A10 PE=1 SV=2	485.09	427.554	1176	1293.9	938.418	1174.96	250.233	230.343	1.30401
61	TRUE	P0DMV8|HS71A_HUMAN	16.64	15.91	21	10	Oxidation (M)	Heat shock 70 kDa protein 1A OS=Homo sapiens OX=9606 GN=HSPA1A PE=1 SV=1	189.068	169.53	286.14	197.007	361.816	402.277	2184.2	2160.86	0.164752
61	TRUE	P0DMV9|HS71B_HUMAN	16.64	15.91	21	10	Oxidation (M)	Heat shock 70 kDa protein 1B OS=Homo sapiens OX=9606 GN=HSPA1B PE=1 SV=1	189.068	169.53	286.14	197.007	361.816	402.277	2184.2	2160.86	0.164752
314	TRUE	P26232|CTNA2_HUMAN	11.13	1.89	5	1		Catenin alpha-2 OS=Homo sapiens OX=9606 GN=CTNNA2 PE=1 SV=5	379.969	253.334	754.362	819.415	1314.44	1461.41	420	393.256	0.614939
330	TRUE	P19634|SL9A1_HUMAN	0.86	10.67	7	7	Oxidation (M)	Sodium/hydrogen exchanger 1 OS=Homo sapiens OX=9606 GN=SLC9A1 PE=1 SV=2	510.52	445.36	1482.21	1370.79	718.564	668.281	211.797	365.194	1.93951
227	TRUE	P50281|MMP14_HUMAN	3.46	14.6	8	8	Oxidation (M)	Matrix metalloproteinase-14 OS=Homo sapiens OX=9606 GN=MMP14 PE=1 SV=3	492.719	839.346	967.881	1494.17	539.13	1046.55	221.968	118.405	1.96989
595	TRUE	O00299|CLIC1_HUMAN	27.65	15.77	3	3	Oxidation (M)	Chloride intracellular channel protein 1 OS=Homo sapiens OX=9606 GN=CLIC1 PE=1 SV=4	365.122	508.165	568.391	618.021	1027.91	1111.95	757.342	758.36	0.563443
132	TRUE	Q9H5V8|CDCP1_HUMAN	2.71	11.36	7	7		CUB domain-containing protein 1 OS=Homo sapiens OX=9606 GN=CDCP1 PE=1 SV=3	483.641	566.737	941.015	939.062	1068.88	906.198	282.195	280.115	1.15491
121	TRUE	P20020|AT2B1_HUMAN	12.86	10.98	20	10	Oxidation (M)	Plasma membrane calcium-transporting ATPase 1 OS=Homo sapiens OX=9606 GN=ATP2B1 PE=1 SV=4	776.192	772.944	1298.14	1281.44	604.545	279.853	194.124	243.266	3.12358
202	TRUE	Q9UKV3|ACINU_HUMAN	2.17	1.04	1	1	Acetylation (N-term)	Apoptotic chromatin condensation inducer in the nucleus OS=Homo sapiens OX=9606 GN=ACIN1 PE=1 SV=2	596.335	104.726	419.285	849.902	1722.44	1452.86	258.629	34.2079	0.5681
110	TRUE	P23396|RS3_HUMAN	1.62	34.98	6	6	Oxidation (M)	40S ribosomal protein S3 OS=Homo sapiens OX=9606 GN=RPS3 PE=1 SV=2	610.355	625.271	1039.14	1012.22	490.249	574.769	546.707	508.686	1.55017
77	TRUE	O43795|MYO1B_HUMAN	25.64	14.26	13	12	Oxidation (M)	Unconventional myosin-Ib OS=Homo sapiens OX=9606 GN=MYO1B PE=1 SV=3	255.823	247.538	388.627	342.963	1588.67	1533.41	440.518	460.429	0.30697
572	TRUE	P16422|EPCAM_HUMAN	3.46	19.43	4	4	Oxidation (M)	Epithelial cell adhesion molecule OS=Homo sapiens OX=9606 GN=EPCAM PE=1 SV=2	650.216	935.967	913.003	918.911	600.854	614.709	325.602	285.889	1.87083
591	TRUE	Q01469|FABP5_HUMAN	15.66	30.37	4	4	Acetylation (N-term); Carbamidomethylation	Fatty acid-binding protein 5 OS=Homo sapiens OX=9606 GN=FABP5 PE=1 SV=3	69.2942	62.1431	63.4415	65.1271	139.193	144.51	2204.52	2423.08	0.0529403
936	TRUE	O60669|MOT2_HUMAN	12.12	6.69	3	3		Monocarboxylate transporter 2 OS=Homo sapiens OX=9606 GN=SLC16A7 PE=1 SV=2	258.188	203.216	623.279	668.461	1235.3	1371.06	317.658	392.45	0.528618
220	TRUE	Q08188|TGM3_HUMAN	11.42	28.14	16	16	Oxidation (M)	Protein-glutamine gamma-glutamyltransferase E OS=Homo sapiens OX=9606 GN=TGM3 PE=1 SV=4	118.679	101.051	147.92	120.784	164.109	113.33	2134.62	2026.77	0.110037
468	TRUE	Q99816|TS101_HUMAN	4.36	22.31	7	7	Oxidation (M)	Tumor susceptibility gene 101 protein OS=Homo sapiens OX=9606 GN=TSG101 PE=1 SV=2	867.689	846.526	595.957	863.258	677.663	726.821	104.621	215.952	1.83961
1176	TRUE	O75787|RENR_HUMAN	6.49	5.71	2	2		Renin receptor OS=Homo sapiens OX=9606 GN=ATP6AP2 PE=1 SV=2	791.136	805.474	810.76	795.288	482.665	573.216	314.046	297.52	1.9207
43	TRUE	O15031|PLXB2_HUMAN	9.74	17.41	23	23	Oxidation (M)	Plexin-B2 OS=Homo sapiens OX=9606 GN=PLXNB2 PE=1 SV=3	241.417	200.719	581.751	641.736	1372.1	1250.34	252.105	270.308	0.529634
970	TRUE	Q9UBI6|GBG12_HUMAN	11.15	56.94	3	3	Carbamidomethylation; Oxidation (M)	Guanine nucleotide-binding protein G(I)/G(S)/G(O) subunit gamma-12 OS=Homo sapiens OX=9606 GN=GNG12 PE=1 SV=3	319.547	353.9	539.699	519.324	1393.25	1134.39	300.11	245.884	0.563656
82	TRUE	P12830|CADH1_HUMAN	12.31	12.59	9	9	Oxidation (M)	Cadherin-1 OS=Homo sapiens OX=9606 GN=CDH1 PE=1 SV=3	332.609	611.333	498.66	335.087	924.412	1478.61	246.474	343.235	0.594002
7	TRUE	P35579|MYH9_HUMAN	9.68	21.58	35	33	Oxidation (M)	Myosin-9 OS=Homo sapiens OX=9606 GN=MYH9 PE=1 SV=4	300.78	243.824	152.198	258.128	180.148	207.606	1673.58	1744.52	0.250911
674	TRUE	Q96P63|SPB12_HUMAN	9.56	26.91	6	6	Oxidation (M)	Serpin B12 OS=Homo sapiens OX=9606 GN=SERPINB12 PE=1 SV=1	381.943	369.927	248.143	236.357	239.617	241.801	1461.64	1510.63	0.357985
15	TRUE	P49327|FAS_HUMAN	1.23	12.58	23	23	Oxidation (M)	Fatty acid synthase OS=Homo sapiens OX=9606 GN=FASN PE=1 SV=3	584.449	615.673	977.862	791.604	349.579	683.129	306.886	328.617	1.7801
437	TRUE	P61026|RAB10_HUMAN	14.64	26.5	5	5		Ras-related protein Rab-10 OS=Homo sapiens OX=9606 GN=RAB10 PE=1 SV=1	324.156	296.356	532.043	602.141	1001.52	1138.61	377.696	345.427	0.612834
752	TRUE	P15151|PVR_HUMAN	7.29	10.31	3	3	Oxidation (M)	Poliovirus receptor OS=Homo sapiens OX=9606 GN=PVR PE=1 SV=2	675.469	585.46	1005.99	979.182	481.125	642.114	124.918	75.3275	2.45269
581	TRUE	Q15286|RAB35_HUMAN	19.67	11.94	3	2	Oxidation (M)	Ras-related protein Rab-35 OS=Homo sapiens OX=9606 GN=RAB35 PE=1 SV=1	247.562	160.503	512.847	521.195	993.797	955.258	591.823	585.219	0.461312
239	TRUE	Q16625|OCLN_HUMAN	6.56	19.73	8	8	Oxidation (M)	Occludin OS=Homo sapiens OX=9606 GN=OCLN PE=1 SV=1	262.733	386.894	642.89	751.362	938.653	955.804	389.911	190.301	0.82592
922	TRUE	Q9H2H9|S38A1_HUMAN	0.71	6.57	3	3		Sodium-coupled neutral amino acid transporter 1 OS=Homo sapiens OX=9606 GN=SLC38A1 PE=1 SV=1	528.13	659.323	665.942	661.177	874.79	856.117	135.07	130.826	1.2593
266	TRUE	Q15582|BGH3_HUMAN	2.99	19.03	9	9	Oxidation (M)	Transforming growth factor-beta-induced protein ig-h3 OS=Homo sapiens OX=9606 GN=TGFBI PE=1 SV=1	311.662	465.015	1111.97	1361.14	462.284	348.948	220.35	211.515	2.61426
623	TRUE	Q9H9H4|VP37B_HUMAN	2.16	20	4	4	Oxidation (M)	Vacuolar protein sorting-associated protein 37B OS=Homo sapiens OX=9606 GN=VPS37B PE=1 SV=1	672.099	800.293	568.357	580.654	708.159	708.562	128.37	159.31	1.53802
168	TRUE	P21589|5NTD_HUMAN	14.28	23	10	10	Oxidation (M)	5'-nucleotidase OS=Homo sapiens OX=9606 GN=NT5E PE=1 SV=1	485.048	662.21	1184.2	1159.22	331.41	278.211	128.577	91.2859	4.20825
587	TRUE	Q14108|SCRB2_HUMAN	53.66	23.43	7	7	Oxidation (M)	Lysosome membrane protein 2 OS=Homo sapiens OX=9606 GN=SCARB2 PE=1 SV=2	184.722	264.691	158.217	189.522	1007.45	1136.91	531.075	608.932	0.242712
1161	TRUE	O95471|CLD7_HUMAN	5.73	7.58	1	1	Oxidation (M)	Claudin-7 OS=Homo sapiens OX=9606 GN=CLDN7 PE=1 SV=4	103.782	505.953	229.189	198.284	1389.61	1449.37	66.6698	101.42	0.344924
1012	TRUE	Q96QD8|S38A2_HUMAN	6.06	10.47	3	3		Sodium-coupled neutral amino acid transporter 2 OS=Homo sapiens OX=9606 GN=SLC38A2 PE=1 SV=2	497.066	244.455	531.869	528.014	929.814	883.562	202.531	201.636	0.812342
75	TRUE	O95425|SVIL_HUMAN	1.63	0.81	1	1	Carbamidomethylation	Supervillin OS=Homo sapiens OX=9606 GN=SVIL PE=1 SV=2	267.408	356.913	842.735	842.654	199.194	303.25	526.319	664.338	1.36419
1301	TRUE	Q04941|PLP2_HUMAN	0.92	8.55	1	1		Proteolipid protein 2 OS=Homo sapiens OX=9606 GN=PLP2 PE=1 SV=1	284.512	294.535	773.167	783.587	610.467	641.459	58.022	517.784	1.16855
1361	TRUE	P19256|LFA3_HUMAN	11.19	4	1	1		Lymphocyte function-associated antigen 3 OS=Homo sapiens OX=9606 GN=CD58 PE=1 SV=1	251.852	218.531	587.975	562.226	838.318	892.523	297.684	309.049	0.693276
6	TRUE	P58107|EPIPL_HUMAN	10.23	12.36	54	44	Oxidation (M)	Epiplakin OS=Homo sapiens OX=9606 GN=EPPK1 PE=1 SV=3	185.279	180.253	152.171	127.143	122.06	168.075	1452.54	1527.25	0.197205
1032	TRUE	P11233|RALA_HUMAN	4.74	14.08	2	2		Ras-related protein Ral-A OS=Homo sapiens OX=9606 GN=RALA PE=1 SV=1	250.917	267.77	785.581	806.524	536.756	551.216	358.998	289.477	1.21558
72	TRUE	P11021|BIP_HUMAN	7.41	34.25	20	17	Oxidation (M)	Endoplasmic reticulum chaperone BiP OS=Homo sapiens OX=9606 GN=HSPA5 PE=1 SV=2	296.716	250.885	207.142	103.787	80.8322	215.57	1341.9	1344.45	0.287832
62	TRUE	Q9UIW2|PLXA1_HUMAN	2.53	7.44	20	11	Oxidation (M)	Plexin-A1 OS=Homo sapiens OX=9606 GN=PLXNA1 PE=1 SV=3	759.74	617.199	392.548	458.218	433.658	670.547	229.053	243.453	1.41288
499	TRUE	Q8N271|PROM2_HUMAN	21.56	7.19	5	5		Prominin-2 OS=Homo sapiens OX=9606 GN=PROM2 PE=1 SV=1	136.52	237.827	254.462	359.436	1019.76	1058.15	319.527	323.042	0.363262
337	TRUE	P06396|GELS_HUMAN	15.02	18.93	10	10	Carbamidomethylation; Oxidation (M)	Gelsolin OS=Homo sapiens OX=9606 GN=GSN PE=1 SV=1	289.996	270.258	304.251	264.952	299.151	377.686	915.889	960.453	0.442372
203	TRUE	Q14574|DSC3_HUMAN	10.41	11.5	8	8	Oxidation (M)	Desmocollin-3 OS=Homo sapiens OX=9606 GN=DSC3 PE=1 SV=3	124.688	182.379	170.064	182.068	156.067	146.66	1399.83	1294.27	0.219966
1287	TRUE	Q9H3Z4|DNJC5_HUMAN	10.22	7.07	1	1		DnaJ homolog subfamily C member 5 OS=Homo sapiens OX=9606 GN=DNAJC5 PE=1 SV=1	85.326	253.352	530.695	520.554	733.359	848.211	298.727	290.988	0.64014
199	TRUE	Q9H4M9|EHD1_HUMAN	20.62	21.91	13	8	Oxidation (M)	EH domain-containing protein 1 OS=Homo sapiens OX=9606 GN=EHD1 PE=1 SV=2	305.463	243.273	330.442	275.976	886.855	825.964	406.591	206.425	0.496662
276	TRUE	P78310|CXAR_HUMAN	4.28	21.64	7	7	Oxidation (M)	Coxsackievirus and adenovirus receptor OS=Homo sapiens OX=9606 GN=CXADR PE=1 SV=1	466.401	519.698	435.851	381.301	453.105	834.4	175.774	212.528	1.07605
154	TRUE	O00159|MYO1C_HUMAN	15.08	15.15	13	12	Oxidation (M)	Unconventional myosin-Ic OS=Homo sapiens OX=9606 GN=MYO1C PE=1 SV=4	275.083	238.677	471.996	398.996	767.306	735.349	268.119	291.938	0.671326
947	TRUE	P11234|RALB_HUMAN	19.8	6.8	1	1		Ras-related protein Ral-B OS=Homo sapiens OX=9606 GN=RALB PE=1 SV=1	118.029	196.593	366.277	364.268	773.66	843.436	366.813	404.108	0.437672
36	TRUE	P35222|CTNB1_HUMAN	2.48	16.39	15	10	Oxidation (M)	Catenin beta-1 OS=Homo sapiens OX=9606 GN=CTNNB1 PE=1 SV=1	299.11	309.322	535.823	576.999	925.326	483.996	154.295	143.868	1.00806
445	TRUE	Q5D862|FILA2_HUMAN	35.11	2.09	4	4		Filaggrin-2 OS=Homo sapiens OX=9606 GN=FLG2 PE=1 SV=1	198.31	260.535	102.908	116.996	512.94	656.155	611.278	958.026	0.247863
185	TRUE	P22735|TGM1_HUMAN	59.56	12.85	8	8		Protein-glutamine gamma-glutamyltransferase K OS=Homo sapiens OX=9606 GN=TGM1 PE=1 SV=4	131.454	126.966	128.369	133.768	829.551	765.43	633.356	648.268	0.180962
749	TRUE	P15529|MCP_HUMAN	0.34	5.61	3	3		Membrane cofactor protein OS=Homo sapiens OX=9606 GN=CD46 PE=1 SV=3	387.398	320.489	557.197	508.641	671.624	607.608	119.644	105.483	1.17906
326	TRUE	P98172|EFNB1_HUMAN	0.68	12.14	3	3		Ephrin-B1 OS=Homo sapiens OX=9606 GN=EFNB1 PE=1 SV=1	298.339	289.869	537.056	445.147	726.487	770.675	121.36	58.4828	0.936437
342	TRUE	P63096|GNAI1_HUMAN	3.77	13.56	9	3		Guanine nucleotide-binding protein G(i) subunit alpha-1 OS=Homo sapiens OX=9606 GN=GNAI1 PE=1 SV=2	167.001	565.994	418.162	435.3	517.349	741.028	151.243	163.242	1.00864
4	TRUE	O75369|FLNB_HUMAN	2.81	14.45	30	28	Oxidation (M)	Filamin-B OS=Homo sapiens OX=9606 GN=FLNB PE=1 SV=2	426.358	363.432	772.55	603.16	181.049	176.51	292.881	335.831	2.19564
264	TRUE	Q9Y5Y6|ST14_HUMAN	22.47	9.01	5	5		Suppressor of tumorigenicity 14 protein OS=Homo sapiens OX=9606 GN=ST14 PE=1 SV=2	355.819	297.616	253.336	312.775	589.705	726.244	225.966	271.557	0.672492
648	TRUE	O43570|CAH12_HUMAN	19.11	19.21	5	5	Oxidation (M)	Carbonic anhydrase 12 OS=Homo sapiens OX=9606 GN=CA12 PE=1 SV=1	278.086	911.95	699.361	649.33	147.036	131.863	93.0771	104.291	5.33047
73	TRUE	O60716|CTND1_HUMAN	15.14	21.9	15	15	Oxidation (M)	Catenin delta-1 OS=Homo sapiens OX=9606 GN=CTNND1 PE=1 SV=1	366.996	379.363	257.635	176.919	654.223	781.538	186.796	203.505	0.646699
360	TRUE	Q86X29|LSR_HUMAN	14.34	12.33	5	5	Oxidation (M)	Lipolysis-stimulated lipoprotein receptor OS=Homo sapiens OX=9606 GN=LSR PE=1 SV=4	233.972	255.724	285.724	305.536	638.762	834.987	195.238	187.091	0.582387
295	TRUE	P61106|RAB14_HUMAN	16.75	39.53	7	7	Oxidation (M)	Ras-related protein Rab-14 OS=Homo sapiens OX=9606 GN=RAB14 PE=1 SV=4	227.098	203.439	393.884	348.973	371.537	438.909	504.39	448.79	0.66533
378	TRUE	P08754|GNAI3_HUMAN	10.17	19.77	10	5	Oxidation (M)	Guanine nucleotide-binding protein G(i) subunit alpha OS=Homo sapiens OX=9606 GN=GNAI3 PE=1 SV=3	229.663	225.382	290.069	308.268	755.452	761.208	201.9	117.398	0.573751
242	TRUE	Q4KMQ2|ANO6_HUMAN	1.81	14.07	9	9	Oxidation (M)	Anoctamin-6 OS=Homo sapiens OX=9606 GN=ANO6 PE=1 SV=2	258.635	247.356	482.416	543.937	577.128	441.048	88.4847	202.836	1.17018
130	TRUE	Q12860|CNTN1_HUMAN	8.78	20.43	15	15	Oxidation (M)	Contactin-1 OS=Homo sapiens OX=9606 GN=CNTN1 PE=1 SV=1	231.575	442.524	637.731	853.936	169.314	227.639	124.824	98.8166	3.48983
618	TRUE	O75976|CBPD_HUMAN	4.75	0.87	1	1		Carboxypeptidase D OS=Homo sapiens OX=9606 GN=CPD PE=1 SV=2	877.919	826.823	181.168	159.1	116.594	86.4387	20.4708	517.014	2.7616
681	TRUE	P62491|RB11A_HUMAN	18.74	14.81	3	3	Acetylation (N-term)	Ras-related protein Rab-11A OS=Homo sapiens OX=9606 GN=RAB11A PE=1 SV=3	483.986	138.282	223.274	298.744	450.127	496.289	340.446	344.956	0.701234
153	TRUE	P98160|PGBM_HUMAN	9.92	5.4	18	18	Oxidation (M)	Basement membrane-specific heparan sulfate proteoglycan core protein OS=Homo sapiens OX=9606 GN=HSPG2 PE=1 SV=4	297.366	261.802	846.323	840.531	163.426	138.942	120.22	99.7986	4.29954
214	TRUE	P13797|PLST_HUMAN	7.5	22.06	11	11	Acetylation (N-term); Oxidation (M)	Plastin-3 OS=Homo sapiens OX=9606 GN=PLS3 PE=1 SV=4	169.709	113.655	413.945	344.003	196.619	175.678	599.156	751.492	0.604379
375	TRUE	P31939|PUR9_HUMAN	7.98	7.43	3	3		Bifunctional purine biosynthesis protein ATIC OS=Homo sapiens OX=9606 GN=ATIC PE=1 SV=3	1667.89	141.374	236.37	333.572	121.599	58.504	102.606	93.1315	6.33036
527	TRUE	Q02487|DSC2_HUMAN	4.52	6.33	4	4		Desmocollin-2 OS=Homo sapiens OX=9606 GN=DSC2 PE=1 SV=1	224.03	212.736	214.282	843.138	191.82	442.992	273.663	285.75	1.25118
409	TRUE	P21281|VATB2_HUMAN	7.88	10.76	5	5		V-type proton ATPase subunit B, brain isoform OS=Homo sapiens OX=9606 GN=ATP6V1B2 PE=1 SV=3	278.777	273.66	150.2	242.381	222.158	114.821	586.857	802.43	0.547435
472	TRUE	P61224|RAP1B_HUMAN	20.49	14.13	8	2	Carbamidomethylation; Oxidation (M)	Ras-related protein Rap-1b OS=Homo sapiens OX=9606 GN=RAP1B PE=1 SV=1	134.92	180.641	165.84	155.64	829.705	845.854	158.447	180.724	0.316192
383	TRUE	P15531|NDKA_HUMAN	30.82	34.87	7	7	Oxidation (M)	Nucleoside diphosphate kinase A OS=Homo sapiens OX=9606 GN=NME1 PE=1 SV=1	347.322	220.784	148.864	175.088	391.495	421.379	492.407	438.934	0.511438
197	TRUE	P46531|NOTC1_HUMAN	0.45	1.84	3	3	Oxidation (M)	Neurogenic locus notch homolog protein 1 OS=Homo sapiens OX=9606 GN=NOTCH1 PE=1 SV=4	102.79	176.607	752.09	741.895	271.057	301.487	142.096	146.529	2.05927
491	TRUE	Q9UKS6|PACN3_HUMAN	8.25	17.69	6	6		Protein kinase C and casein kinase substrate in neurons protein 3 OS=Homo sapiens OX=9606 GN=PACSIN3 PE=1 SV=2	244.139	263.967	335.193	347.811	579.218	555.49	156.434	149.355	0.826874
829	TRUE	P51636|CAV2_HUMAN	12.59	26.54	2	2	Oxidation (M)	Caveolin-2 OS=Homo sapiens OX=9606 GN=CAV2 PE=1 SV=2	688.97	612.922	323.335	318.036	260.158	271.435	72.6995	78.6244	2.84554
97	TRUE	P00533|EGFR_HUMAN	16.52	10.17	11	10	Oxidation (M)	Epidermal growth factor receptor OS=Homo sapiens OX=9606 GN=EGFR PE=1 SV=2	155.823	170.162	346.025	226.798	466.842	797.582	218.587	222.296	0.527066
514	TRUE	P20340|RAB6A_HUMAN	9.38	23.56	4	4	Oxidation (M)	Ras-related protein Rab-6A OS=Homo sapiens OX=9606 GN=RAB6A PE=1 SV=3	166.505	263.45	359.562	499.734	354.065	406.296	238.031	315.847	0.980987
683	TRUE	P0DP23|CALM1_HUMAN	5.12	32.21	5	5	Oxidation (M)	Calmodulin-1 OS=Homo sapiens OX=9606 GN=CALM1 PE=1 SV=1	233.716	76.2546	151.397	154.073	109.63	37.8518	849.898	922.085	0.320632
683	TRUE	P0DP24|CALM2_HUMAN	5.12	32.21	5	5	Oxidation (M)	Calmodulin-2 OS=Homo sapiens OX=9606 GN=CALM2 PE=1 SV=1	233.716	76.2546	151.397	154.073	109.63	37.8518	849.898	922.085	0.320632
683	TRUE	P0DP25|CALM3_HUMAN	5.12	32.21	5	5	Oxidation (M)	Calmodulin-3 OS=Homo sapiens OX=9606 GN=CALM3 PE=1 SV=1	233.716	76.2546	151.397	154.073	109.63	37.8518	849.898	922.085	0.320632
761	TRUE	Q12846|STX4_HUMAN	1.06	24.24	6	6		Syntaxin-4 OS=Homo sapiens OX=9606 GN=STX4 PE=1 SV=2	269.075	170.655	584.34	648.32	281.615	269.455	123.093	141.205	2.05109
65	TRUE	Q9UMD9|COHA1_HUMAN	12.27	2.47	4	4	Oxidation (M)	Collagen alpha-1(XVII) chain OS=Homo sapiens OX=9606 GN=COL17A1 PE=1 SV=3	71.4883	41.4364	121.397	98.9045	298.526	266.197	1535.74	51.2771	0.154864
394	TRUE	O75044|SRGP2_HUMAN	1.9	3.92	4	4		SLIT-ROBO Rho GTPase-activating protein 2 OS=Homo sapiens OX=9606 GN=SRGAP2 PE=1 SV=3	632.172	674.55	87.1517	85.9011	281.12	300.011	45.4835	360.429	1.4992
794	TRUE	P63000|RAC1_HUMAN	21.5	7.81	3	2	Oxidation (M)	Ras-related C3 botulinum toxin substrate 1 OS=Homo sapiens OX=9606 GN=RAC1 PE=1 SV=1	111.589	129.497	210.214	189.185	706.306	721.607	185.202	210.673	0.351183
352	TRUE	P09543|CN37_HUMAN	30.36	19.95	7	7	Oxidation (M)	2',3'-cyclic-nucleotide 3'-phosphodiesterase OS=Homo sapiens OX=9606 GN=CNP PE=1 SV=2	148.63	153.055	206.946	206.466	509.662	633.975	262.664	284.315	0.42298
465	TRUE	P04040|CATA_HUMAN	9.18	16.13	6	6		Catalase OS=Homo sapiens OX=9606 GN=CAT PE=1 SV=3	158.037	215.271	236.013	223.343	119.742	252.48	644.34	554.636	0.529955
725	TRUE	P18084|ITB5_HUMAN	12.45	3.13	2	2		Integrin beta-5 OS=Homo sapiens OX=9606 GN=ITGB5 PE=1 SV=1	181.536	128.225	277.492	322.36	620.653	525.96	165.003	168.337	0.614622
288	TRUE	P15311|EZRI_HUMAN	44.16	21.16	14	10	Oxidation (M)	Ezrin OS=Homo sapiens OX=9606 GN=EZR PE=1 SV=4	272.948	161.469	144.757	126.967	553.276	398.078	313.738	403.696	0.423146
830	TRUE	P61421|VA0D1_HUMAN	14.94	13.39	4	4		V-type proton ATPase subunit d 1 OS=Homo sapiens OX=9606 GN=ATP6V0D1 PE=1 SV=1	226.434	204.979	307.109	215.285	521.918	560.839	167.746	168.074	0.672369
393	TRUE	P48960|AGRE5_HUMAN	9.68	8.74	4	4	Oxidation (M)	Adhesion G protein-coupled receptor E5 OS=Homo sapiens OX=9606 GN=ADGRE5 PE=1 SV=4	312.487	320.59	615.683	486.271	191.553	216.257	106.04	108.147	2.78945
992	TRUE	Q99541|PLIN2_HUMAN	0.77	2.29	1	1		Perilipin-2 OS=Homo sapiens OX=9606 GN=PLIN2 PE=1 SV=2	562.319	58.651	102.887	606.504	333.545	562.738	66.0956	40.6	1.32641
122	TRUE	P52597|HNRPF_HUMAN	4.66	10.6	3	3		Heterogeneous nuclear ribonucleoprotein F OS=Homo sapiens OX=9606 GN=HNRNPF PE=1 SV=3	308.268	256.984	554.672	560.897	124.524	109.826	181.993	228.377	2.60705
33	TRUE	P46940|IQGA1_HUMAN	12.48	13.82	17	16	Oxidation (M)	Ras GTPase-activating-like protein IQGAP1 OS=Homo sapiens OX=9606 GN=IQGAP1 PE=1 SV=1	335.012	163.197	276.238	197.046	224.059	243.806	432.519	446.45	0.721316
13	TRUE	P21333|FLNA_HUMAN	0.71	12.35	25	23	Oxidation (M)	Filamin-A OS=Homo sapiens OX=9606 GN=FLNA PE=1 SV=4	223.547	596.28	348.419	232.597	120.306	228.527	236.873	272.758	1.63181
821	TRUE	Q9UKE5|TNIK_HUMAN	15.53	3.6	4	4		TRAF2 and NCK-interacting protein kinase OS=Homo sapiens OX=9606 GN=TNIK PE=1 SV=1	227.189	253.972	300.301	94.8513	645.302	380.506	172.395	176.692	0.637368
390	TRUE	Q14344|GNA13_HUMAN	27.5	19.1	7	6		Guanine nucleotide-binding protein subunit alpha-13 OS=Homo sapiens OX=9606 GN=GNA13 PE=1 SV=2	219.83	125.636	101.969	179.319	564.307	649.031	213.577	196.976	0.385958
663	TRUE	P10301|RRAS_HUMAN	16.3	20.64	4	3		Ras-related protein R-Ras OS=Homo sapiens OX=9606 GN=RRAS PE=1 SV=1	264.094	222.374	204.394	191.301	610.381	420.239	167.868	133.525	0.662278
27	TRUE	O75691|UTP20_HUMAN	7.03	0.39	1	1		Small subunit processome component 20 homolog OS=Homo sapiens OX=9606 GN=UTP20 PE=1 SV=3	53.1156	56.5644	95.3663	75.8522	39.2945	37.313	884.061	943.9	0.147487
208	TRUE	P14735|IDE_HUMAN	21.33	20.31	18	18	Oxidation (M)	Insulin-degrading enzyme OS=Homo sapiens OX=9606 GN=IDE PE=1 SV=4	25.0425	24.5476	22.1545	30.4995	1294.91	39.0815	350.968	378.02	0.0495613
1235	TRUE	Q969X1|LFG3_HUMAN	8.2	4.82	2	2		Protein lifeguard 3 OS=Homo sapiens OX=9606 GN=TMBIM1 PE=1 SV=2	150.382	71.4496	344.559	348.397	457.05	475.254	159.695	135.469	0.745264
939	TRUE	Q10589|BST2_HUMAN	24.2	13.89	2	2		Bone marrow stromal antigen 2 OS=Homo sapiens OX=9606 GN=BST2 PE=1 SV=1	84.123	29.2508	57.3736	59.6153	801.818	852.398	105.564	144.283	0.120985
1056	TRUE	P01834|IGKC_HUMAN	6.59	31.78	2	2		Immunoglobulin kappa constant OS=Homo sapiens OX=9606 GN=IGKC PE=1 SV=2	169.868	123.759	47.4575	158.893	94.6073	44.3067	742.474	741.525	0.308074
1056	TRUE	P0DOX7|IGK_HUMAN	6.59	15.89	2	2		Immunoglobulin kappa light chain OS=Homo sapiens OX=9606 PE=1 SV=1	169.868	123.759	47.4575	158.893	94.6073	44.3067	742.474	741.525	0.308074
67	TRUE	Q13308|PTK7_HUMAN	18.43	8.41	8	8		Inactive tyrosine-protein kinase 7 OS=Homo sapiens OX=9606 GN=PTK7 PE=1 SV=2	157.498	135.197	208.099	169.277	538.669	574.141	151.38	147.63	0.474615
367	TRUE	Q14254|FLOT2_HUMAN	1.91	14.25	5	5	Oxidation (M)	Flotillin-2 OS=Homo sapiens OX=9606 GN=FLOT2 PE=1 SV=2	188.857	172.459	342.558	477.221	256.45	244.225	264.463	87.6216	1.38503
118	TRUE	P54652|HSP72_HUMAN	12.76	16.43	18	8	Oxidation (M)	Heat shock-related 70 kDa protein 2 OS=Homo sapiens OX=9606 GN=HSPA2 PE=1 SV=1	92.1051	85.9488	97.3177	65.9025	100.209	100.201	696.79	793.497	0.201854
46	TRUE	P53396|ACLY_HUMAN	5.46	16.17	13	13	Oxidation (M)	ATP-citrate synthase OS=Homo sapiens OX=9606 GN=ACLY PE=1 SV=3	252.162	277.388	369.036	496.465	260.019	164.378	107.385	100.08	2.20784
697	TRUE	P63167|DYL1_HUMAN	10.67	12.36	1	1		Dynein light chain 1, cytoplasmic OS=Homo sapiens OX=9606 GN=DYNLL1 PE=1 SV=1	85.324	50.6936	215.269	260.668	150.751	170.73	454.509	611.206	0.441145
103	TRUE	P22223|CADH3_HUMAN	1.98	10.01	7	7		Cadherin-3 OS=Homo sapiens OX=9606 GN=CDH3 PE=1 SV=2	212.186	173.314	443.044	478.063	289.172	235.259	69.798	87.1636	1.91755
699	TRUE	P20648|ATP4A_HUMAN	2.33	2.71	3	1	Carbamidomethylation	Potassium-transporting ATPase alpha chain 1 OS=Homo sapiens OX=9606 GN=ATP4A PE=2 SV=5	248.959	300.04	163.791	353.465	134.403	141.331	153.254	486.521	1.16466
709	TRUE	P09493|TPM1_HUMAN	7.7	12.32	5	5	Oxidation (M)	Tropomyosin alpha-1 chain OS=Homo sapiens OX=9606 GN=TPM1 PE=1 SV=2	164.371	131.912	106.959	120.535	144.813	51.9849	646.285	611.82	0.360008
147	TRUE	Q9Y446|PKP3_HUMAN	15.85	18.32	10	10		Plakophilin-3 OS=Homo sapiens OX=9606 GN=PKP3 PE=1 SV=1	76.5149	64.2138	196.26	137.183	181.897	198.588	579.141	543.295	0.3155
1205	TRUE	Q15043|S39AE_HUMAN	17.25	2.64	1	1		Metal cation symporter ZIP14 OS=Homo sapiens OX=9606 GN=SLC39A14 PE=1 SV=3	382.582	246.221	454.928	440.382	112.011	166.245	66.0848	67.5224	3.70053
612	TRUE	P30419|NMT1_HUMAN	4.41	2.82	1	1	Oxidation (M)	Glycylpeptide N-tetradecanoyltransferase 1 OS=Homo sapiens OX=9606 GN=NMT1 PE=1 SV=2	309.599	313.037	310.053	307.133	240.406	218.446	113.376	118.56	1.7948
577	TRUE	Q99805|TM9S2_HUMAN	5.5	6.79	4	4	Oxidation (M)	Transmembrane 9 superfamily member 2 OS=Homo sapiens OX=9606 GN=TM9SF2 PE=1 SV=1	295.23	544.84	149.981	152.861	258.732	188.171	161.875	174.463	1.45921
758	TRUE	Q96RD7|PANX1_HUMAN	6.57	9.15	3	3		Pannexin-1 OS=Homo sapiens OX=9606 GN=PANX1 PE=1 SV=4	222.926	247.102	448.767	444.224	182.712	206.745	86.0163	70.3267	2.49729
172	TRUE	P54753|EPHB3_HUMAN	11.34	5.11	7	4	Oxidation (M)	Ephrin type-B receptor 3 OS=Homo sapiens OX=9606 GN=EPHB3 PE=1 SV=2	271.045	428.234	140.704	61.468	276.505	347.528	233.072	140.613	0.903513
30	TRUE	P49368|TCPG_HUMAN	10.37	11.93	6	6	Oxidation (M)	T-complex protein 1 subunit gamma OS=Homo sapiens OX=9606 GN=CCT3 PE=1 SV=4	233.24	216.413	254.828	270.509	202.201	208.189	239.914	272.905	1.05609
270	TRUE	P26038|MOES_HUMAN	27.07	20.1	13	9	Oxidation (M)	Moesin OS=Homo sapiens OX=9606 GN=MSN PE=1 SV=3	207.498	162.041	197.279	218.267	285.823	361.613	202.467	245.278	0.716854
401	TRUE	Q16658|FSCN1_HUMAN	1.6	13.79	6	6		Fascin OS=Homo sapiens OX=9606 GN=FSCN1 PE=1 SV=3	230.107	278.711	252.892	296.284	252.715	349.266	103.721	97.907	1.31655
778	TRUE	P48029|SC6A8_HUMAN	1.04	7.87	4	4		Sodium- and chloride-dependent creatine transporter 1 OS=Homo sapiens OX=9606 GN=SLC6A8 PE=1 SV=1	211.86	239.051	368.841	300.744	260.16	328.303	63.8727	83.8682	1.52199
83	TRUE	P29323|EPHB2_HUMAN	20.87	8.91	10	7	Oxidation (M)	Ephrin type-B receptor 2 OS=Homo sapiens OX=9606 GN=EPHB2 PE=1 SV=5	246.641	217.236	165.029	193.63	190.717	316.673	249.461	247.978	0.818584
99	TRUE	Q9UIQ6|LCAP_HUMAN	2.76	8.2	7	7	Oxidation (M)	Leucyl-cystinyl aminopeptidase OS=Homo sapiens OX=9606 GN=LNPEP PE=1 SV=3	213.788	260.684	248.661	236.588	399.319	253.061	97.9874	85.0831	1.14875
615	TRUE	O14763|TR10B_HUMAN	11.73	11.59	4	4	Oxidation (M)	Tumor necrosis factor receptor superfamily member 10B OS=Homo sapiens OX=9606 GN=TNFRSF10B PE=1 SV=2	289.357	200.452	408.399	478.529	184.853	121.051	58.3072	33.9878	3.45741
142	TRUE	P07237|PDIA1_HUMAN	10.51	25.59	11	11	Oxidation (M)	Protein disulfide-isomerase OS=Homo sapiens OX=9606 GN=P4HB PE=1 SV=3	93.6117	100.527	128.284	132.471	101.369	105.119	536.845	558.793	0.349347
94	TRUE	P06576|ATPB_HUMAN	20.14	23.25	8	8	Oxidation (M)	ATP synthase subunit beta, mitochondrial OS=Homo sapiens OX=9606 GN=ATP5F1B PE=1 SV=3	218.978	201.292	263.03	187.373	262.456	228.13	198.964	195.817	0.983403
642	TRUE	P62330|ARF6_HUMAN	4.6	26.86	4	4	Oxidation (M)	ADP-ribosylation factor 6 OS=Homo sapiens OX=9606 GN=ARF6 PE=1 SV=2	226.48	245.236	157.926	140.896	534.692	253.837	91.7439	58.7747	0.820554
259	TRUE	P63244|RACK1_HUMAN	0.39	16.4	4	4	Oxidation (M)	Receptor of activated protein C kinase 1 OS=Homo sapiens OX=9606 GN=RACK1 PE=1 SV=3	282.674	169.848	308.894	276.971	127.115	110.825	190.334	219.698	1.60252
707	TRUE	O00161|SNP23_HUMAN	2.87	15.64	3	3	Oxidation (M)	Synaptosomal-associated protein 23 OS=Homo sapiens OX=9606 GN=SNAP23 PE=1 SV=1	186.023	155.296	292.807	290.154	276.629	279.674	105.867	88.3741	1.23148
473	TRUE	P78536|ADA17_HUMAN	8.14	6.07	4	4	Oxidation (M)	Disintegrin and metalloproteinase domain-containing protein 17 OS=Homo sapiens OX=9606 GN=ADAM17 PE=1 SV=1	285.094	261.011	339.902	260.348	157.386	98.3171	144.365	95.3836	2.31376
192	TRUE	Q9Y2A7|NCKP1_HUMAN	20.42	5.94	6	6	Oxidation (M)	Nck-associated protein 1 OS=Homo sapiens OX=9606 GN=NCKAP1 PE=1 SV=1	156.295	153.795	166.809	186.82	307.142	378.52	123.82	153.46	0.689261
1260	TRUE	O75712|CXB3_HUMAN	3.96	9.63	2	2		Gap junction beta-3 protein OS=Homo sapiens OX=9606 GN=GJB3 PE=1 SV=1	243.208	53.3842	161.304	115.44	457.759	448.847	37.3039	44.1884	0.580243
635	TRUE	P13928|ANXA8_HUMAN	13.31	25.08	6	6	Oxidation (M)	Annexin A8 OS=Homo sapiens OX=9606 GN=ANXA8 PE=1 SV=3	101.248	109.289	77.6274	136.929	143.643	96.1872	423.294	459.752	0.378576
471	TRUE	P29966|MARCS_HUMAN	9.72	34.94	7	7		Myristoylated alanine-rich C-kinase substrate OS=Homo sapiens OX=9606 GN=MARCKS PE=1 SV=4	173.842	142.104	168.969	151.584	382.555	354.854	102.372	70.8487	0.698965
755	TRUE	Q8WUD1|RAB2B_HUMAN	21.77	17.13	3	3		Ras-related protein Rab-2B OS=Homo sapiens OX=9606 GN=RAB2B PE=1 SV=1	157.005	162.336	178.873	207.241	305.015	211.442	152.734	154.806	0.856137
840	TRUE	P11279|LAMP1_HUMAN	24.5	6	2	2		Lysosome-associated membrane glycoprotein 1 OS=Homo sapiens OX=9606 GN=LAMP1 PE=1 SV=3	28.6843	133.285	129.957	53.6898	319.146	363.069	245.388	252.626	0.292838
786	TRUE	Q9Y3L5|RAP2C_HUMAN	8.28	6.56	3	1	Oxidation (M)	Ras-related protein Rap-2c OS=Homo sapiens OX=9606 GN=RAP2C PE=1 SV=1	364.525	334.992	188.987	203.754	228.802	68.7754	104.858	29.0355	2.53147
894	TRUE	P30825|SL7A1_HUMAN	4.04	4.77	3	2	Oxidation (M)	High affinity cationic amino acid transporter 1 OS=Homo sapiens OX=9606 GN=SLC7A1 PE=1 SV=1	145.654	112.835	270.54	256.09	270.703	274.684	73.3433	102.26	1.08894
380	TRUE	P12931|SRC_HUMAN	11.07	18.84	9	7		Proto-oncogene tyrosine-protein kinase Src OS=Homo sapiens OX=9606 GN=SRC PE=1 SV=3	137.053	214.077	74.1081	106.14	415.493	394.603	54.1412	107.629	0.54676
100	TRUE	Q13835|PKP1_HUMAN	20.47	10.58	6	6	Oxidation (M)	Plakophilin-1 OS=Homo sapiens OX=9606 GN=PKP1 PE=1 SV=2	100.959	72.1398	141.01	120.29	167.187	225.043	345.304	328.861	0.407352
981	TRUE	P13473|LAMP2_HUMAN	17.79	7.07	3	3		Lysosome-associated membrane glycoprotein 2 OS=Homo sapiens OX=9606 GN=LAMP2 PE=1 SV=2	82.0511	139.657	41.4167	88.0529	492.494	479.072	69.2457	103.624	0.306857
759	TRUE	Q9NUP9|LIN7C_HUMAN	18.85	17.26	3	3	Acetylation (N-term); Oxidation (M)	Protein lin-7 homolog C OS=Homo sapiens OX=9606 GN=LIN7C PE=1 SV=1	146.331	151.102	174.85	169.772	271.778	327.581	111.397	140.976	0.753823
373	TRUE	Q96QA5|GSDMA_HUMAN	13	36.18	11	11	Oxidation (M)	Gasdermin-A OS=Homo sapiens OX=9606 GN=GSDMA PE=1 SV=4	68.4545	72.607	74.0872	54.5166	77.2186	82.4319	522.147	536.723	0.221306
23	TRUE	P05787|K2C8_HUMAN	10.2	15.11	18	7	Acetylation (N-term); Oxidation (M)	Keratin, type II cytoskeletal 8 OS=Homo sapiens OX=9606 GN=KRT8 PE=1 SV=7	71.6029	74.4479	80.3233	103.503	65.4525	82.1057	495.614	503.709	0.28763
273	TRUE	Q96TA1|NIBA2_HUMAN	27.14	9.25	5	5	Oxidation (M)	Protein Niban 2 OS=Homo sapiens OX=9606 GN=NIBAN2 PE=1 SV=3	194.776	194.809	150.255	199.262	248.132	222.113	127.921	136.553	1.00597
478	TRUE	Q8TD43|TRPM4_HUMAN	10.34	5.77	6	6	Oxidation (M)	Transient receptor potential cation channel subfamily M member 4 OS=Homo sapiens OX=9606 GN=TRPM4 PE=1 SV=1	202.509	193.125	397.947	289.001	122.956	124.545	64.4047	64.8079	2.87376
207	TRUE	Q6P4Q7|CNNM4_HUMAN	10.99	6.45	4	4	Oxidation (M)	Metal transporter CNNM4 OS=Homo sapiens OX=9606 GN=CNNM4 PE=1 SV=3	98.4989	92.1938	204.063	200.787	292.035	354.185	125.087	90.2756	0.691219
1596	TRUE	P48509|CD151_HUMAN	1.07	3.95	1	1		CD151 antigen OS=Homo sapiens OX=9606 GN=CD151 PE=1 SV=3	129.983	139.593	187.133	175.33	365.752	373.08	38.9303	27.9555	0.784442
251	TRUE	P07384|CAN1_HUMAN	13.13	8.4	5	5	Oxidation (M)	Calpain-1 catalytic subunit OS=Homo sapiens OX=9606 GN=CAPN1 PE=1 SV=1	132.363	152.026	119.354	182.104	131.285	158.341	265.743	294.963	0.688963
234	TRUE	Q9UQB8|BAIP2_HUMAN	25.23	13.41	6	6	Oxidation (M)	Brain-specific angiogenesis inhibitor 1-associated protein 2 OS=Homo sapiens OX=9606 GN=BAIAP2 PE=1 SV=1	97.2812	89.0992	133.069	126.54	293.407	379.078	132.615	142.608	0.470598
1292	TRUE	P51157|RAB28_HUMAN	8.47	4.98	1	1		Ras-related protein Rab-28 OS=Homo sapiens OX=9606 GN=RAB28 PE=1 SV=2	85.6945	44.4572	270.804	233.456	163.085	175.261	223.59	188.892	0.84495
420	TRUE	P06744|G6PI_HUMAN	12.76	10.22	4	4		Glucose-6-phosphate isomerase OS=Homo sapiens OX=9606 GN=GPI PE=1 SV=4	147.423	88.6833	118.02	121.365	147.47	97.6838	330.091	326.976	0.527024
726	TRUE	Q13433|S39A6_HUMAN	4.06	3.97	3	3		Zinc transporter ZIP6 OS=Homo sapiens OX=9606 GN=SLC39A6 PE=1 SV=3	58.3635	69.955	272.178	222.784	286.082	351.932	51.3279	59.017	0.832861
235	TRUE	P32926|DSG3_HUMAN	8.62	3.7	3	3	Oxidation (M)	Desmoglein-3 OS=Homo sapiens OX=9606 GN=DSG3 PE=1 SV=2	83.2642	43.2351	76.603	131.851	97.7691	783.458	64.83	63.4389	0.331803
1480	TRUE	P0DP57|SLUR2_HUMAN	8.14	13.4	1	1		Secreted Ly-6/uPAR domain-containing protein 2 OS=Homo sapiens OX=9606 GN=SLURP2 PE=1 SV=1	34.1253	47.4766	34.4174	26.7048	22.8558	23.3851	533.353	607.977	0.120182
503	TRUE	P05120|PAI2_HUMAN	5.61	20	8	8	Oxidation (M)	Plasminogen activator inhibitor 2 OS=Homo sapiens OX=9606 GN=SERPINB2 PE=1 SV=2	88.6992	76.4327	187.946	173.736	72.3705	75.3359	322.486	329.578	0.658707
539	TRUE	P20073|ANXA7_HUMAN	0.49	9.63	4	4		Annexin A7 OS=Homo sapiens OX=9606 GN=ANXA7 PE=1 SV=3	289.979	183.77	175.249	185.822	122.014	177.574	106.517	84.8792	1.7003
279	TRUE	P18433|PTPRA_HUMAN	2.2	5.36	4	4		Receptor-type tyrosine-protein phosphatase alpha OS=Homo sapiens OX=9606 GN=PTPRA PE=1 SV=3	110.308	117.933	376.291	315.716	139.632	139.924	46.8353	78.3923	2.27343
231	TRUE	Q92797|SYMPK_HUMAN	1.13	1.02	1	1		Symplekin OS=Homo sapiens OX=9606 GN=SYMPK PE=1 SV=2	282.254	232.071	149.864	120.529	188.318	219.656	59.3793	39.2937	1.54885
101	TRUE	O00571|DDX3X_HUMAN	4.49	14.65	8	8		ATP-dependent RNA helicase DDX3X OS=Homo sapiens OX=9606 GN=DDX3X PE=1 SV=3	101.984	112.569	133.424	138.272	50.9733	61.8308	343.242	346.469	0.605906
26	TRUE	O60437|PEPL_HUMAN	12.74	13.67	21	21		Periplakin OS=Homo sapiens OX=9606 GN=PPL PE=1 SV=4	44.8294	63.3531	59.0609	66.8516	77.9731	60.8664	471.264	444.471	0.221981
1346	TRUE	P15104|GLNA_HUMAN	5.27	5.36	1	1		Glutamine synthetase OS=Homo sapiens OX=9606 GN=GLUL PE=1 SV=4	35.4435	547.722	89.0129	421.146	18.591	15.5116	71.3806	82.0016	5.83153
9	TRUE	P10586|PTPRF_HUMAN	10.65	1.68	4	2		Receptor-type tyrosine-protein phosphatase F OS=Homo sapiens OX=9606 GN=PTPRF PE=1 SV=2	98.6603	69.0772	130.318	168.931	241.15	413.098	69.7461	85.3024	0.577028
1234	TRUE	P01859|IGHG2_HUMAN	4.61	4.91	2	1		Immunoglobulin heavy constant gamma 2 OS=Homo sapiens OX=9606 GN=IGHG2 PE=1 SV=2	169.11	173.616	89.4875	157.377	100.083	56.4917	259.862	269.129	0.860004
387	TRUE	Q9BTU6|P4K2A_HUMAN	5.75	12.32	5	5		Phosphatidylinositol 4-kinase type 2-alpha OS=Homo sapiens OX=9606 GN=PI4K2A PE=1 SV=1	146.827	85.3546	199.625	217.337	287.644	162.749	92.8474	81.3589	1.0393
84	TRUE	P27824|CALX_HUMAN	17.81	8.78	4	4	Oxidation (M)	Calnexin OS=Homo sapiens OX=9606 GN=CANX PE=1 SV=2	199.002	184.898	118.133	165.543	201.036	179.189	111.552	90.2253	1.14703
302	TRUE	Q01518|CAP1_HUMAN	21.48	14.53	6	6	Carbamidomethylation; Oxidation (M)	Adenylyl cyclase-associated protein 1 OS=Homo sapiens OX=9606 GN=CAP1 PE=1 SV=5	80.8365	137.27	55.8908	136.003	181.929	149.011	248.309	238.238	0.501538
93	TRUE	P10809|CH60_HUMAN	16.77	11.87	5	5	Oxidation (M)	60 kDa heat shock protein, mitochondrial OS=Homo sapiens OX=9606 GN=HSPD1 PE=1 SV=2	207.808	202.429	291.993	263.931	79.5953	45.2859	74.2079	61.0678	3.71377
1312	TRUE	P0CG04|IGLC1_HUMAN	20.44	14.15	1	1		Immunoglobulin lambda constant 1 OS=Homo sapiens OX=9606 GN=IGLC1 PE=1 SV=1	99.1022	55.7026	32.1363	123.686	136.936	169.636	291.984	313.245	0.340674
1312	TRUE	P0DOY3|IGLC3_HUMAN	20.44	14.15	1	1		Immunoglobulin lambda constant 3 OS=Homo sapiens OX=9606 GN=IGLC3 PE=1 SV=1	99.1022	55.7026	32.1363	123.686	136.936	169.636	291.984	313.245	0.340674
1312	TRUE	P0DOY2|IGLC2_HUMAN	20.44	14.15	1	1		Immunoglobulin lambda constant 2 OS=Homo sapiens OX=9606 GN=IGLC2 PE=1 SV=1	99.1022	55.7026	32.1363	123.686	136.936	169.636	291.984	313.245	0.340674
1312	TRUE	A0M8Q6|IGLC7_HUMAN	20.44	14.15	1	1		Immunoglobulin lambda constant 7 OS=Homo sapiens OX=9606 GN=IGLC7 PE=1 SV=3	99.1022	55.7026	32.1363	123.686	136.936	169.636	291.984	313.245	0.340674
1312	TRUE	P0CF74|IGLC6_HUMAN	20.44	14.15	1	1		Immunoglobulin lambda constant 6 OS=Homo sapiens OX=9606 GN=IGLC6 PE=1 SV=1	99.1022	55.7026	32.1363	123.686	136.936	169.636	291.984	313.245	0.340674
1312	TRUE	B9A064|IGLL5_HUMAN	20.44	7.01	1	1		Immunoglobulin lambda-like polypeptide 5 OS=Homo sapiens OX=9606 GN=IGLL5 PE=2 SV=2	99.1022	55.7026	32.1363	123.686	136.936	169.636	291.984	313.245	0.340674
1312	TRUE	P0DOX8|IGL1_HUMAN	20.44	6.94	1	1		Immunoglobulin lambda-1 light chain OS=Homo sapiens OX=9606 PE=1 SV=1	99.1022	55.7026	32.1363	123.686	136.936	169.636	291.984	313.245	0.340674
746	TRUE	Q5VZ89|DEN4C_HUMAN	0.79	0.47	1	1		DENN domain-containing protein 4C OS=Homo sapiens OX=9606 GN=DENND4C PE=1 SV=3	207.955	345.567	92.501	100.034	161.514	223.85	37.4831	41.7234	1.60591
353	TRUE	P18206|VINC_HUMAN	22.48	13.58	10	10	Oxidation (M)	Vinculin OS=Homo sapiens OX=9606 GN=VCL PE=1 SV=4	56.3818	55.2292	99.5423	75.8996	110.784	284.671	242.923	274.371	0.314493
522	TRUE	P00749|UROK_HUMAN	2.95	6.26	2	2		Urokinase-type plasminogen activator OS=Homo sapiens OX=9606 GN=PLAU PE=1 SV=2	31.4031	42.0974	235.974	366.731	137.05	200.675	107.293	40.4524	1.39289
265	TRUE	P07476|INVO_HUMAN	17.75	24.1	11	11		Involucrin OS=Homo sapiens OX=9606 GN=IVL PE=1 SV=2	27.661	20.2654	58.8597	37.5774	72.5623	88.6852	451.538	399.288	0.142641
912	TRUE	P43007|SATT_HUMAN	8.9	8.08	3	3		Neutral amino acid transporter A OS=Homo sapiens OX=9606 GN=SLC1A4 PE=1 SV=1	124.194	148.587	142.424	142.636	131.342	87.2476	177.428	195.92	0.9424
28	TRUE	Q14517|FAT1_HUMAN	5.32	1.94	7	7	Oxidation (M)	Protocadherin Fat 1 OS=Homo sapiens OX=9606 GN=FAT1 PE=1 SV=2	178.601	293.896	117.693	161.742	215.805	108.215	21.4714	34.5489	1.97856
329	TRUE	Q9C0B5|ZDHC5_HUMAN	4.02	7.83	4	4	Oxidation (M)	Palmitoyltransferase ZDHHC5 OS=Homo sapiens OX=9606 GN=ZDHHC5 PE=1 SV=2	100.093	112.378	144.027	231.588	94.0667	273.028	75.9113	91.9955	1.09923
620	TRUE	Q93050|VPP1_HUMAN	12.89	6.57	4	4	Oxidation (M)	V-type proton ATPase 116 kDa subunit a1 OS=Homo sapiens OX=9606 GN=ATP6V0A1 PE=1 SV=3	120.176	153.444	137.098	180.426	152.082	167.831	106.819	100.927	1.12032
405	TRUE	P20339|RAB5A_HUMAN	6.38	13.02	5	2	Oxidation (M)	Ras-related protein Rab-5A OS=Homo sapiens OX=9606 GN=RAB5A PE=1 SV=2	54.326	117.828	176.905	180.935	68.4693	183.35	173.822	158.305	0.907607
700	TRUE	Q08209|PP2BA_HUMAN	2.94	4.41	2	2		Serine/threonine-protein phosphatase 2B catalytic subunit alpha isoform OS=Homo sapiens OX=9606 GN=PPP3CA PE=1 SV=1	52.0426	69.054	252.414	232.712	174.064	172.74	62.0356	62.2163	1.28694
669	TRUE	P09601|HMOX1_HUMAN	4.31	17.36	4	4	Oxidation (M)	Heme oxygenase 1 OS=Homo sapiens OX=9606 GN=HMOX1 PE=1 SV=1	154.966	82.5129	165.595	106.02	54.5689	80.5408	212.775	217.595	0.900286
831	TRUE	P09525|ANXA4_HUMAN	10.62	17.24	4	4	Oxidation (M)	Annexin A4 OS=Homo sapiens OX=9606 GN=ANXA4 PE=1 SV=4	50.1443	57.1582	100.895	103.941	67.4734	81.5322	320.094	286.161	0.413286
948	TRUE	Q6PCB8|EMB_HUMAN	9.19	3.98	1	1		Embigin OS=Homo sapiens OX=9606 GN=EMB PE=1 SV=1	102.115	99.936	115.244	57.6402	302.05	293.889	44.588	50.4265	0.542635
790	TRUE	Q7Z402|TMC7_HUMAN	14.03	5.39	4	4	Oxidation (M)	Transmembrane channel-like protein 7 OS=Homo sapiens OX=9606 GN=TMC7 PE=1 SV=1	55.6024	66.9527	111.419	118.535	251.398	311.982	75.6928	67.5878	0.498839
1140	TRUE	O75608|LYPA1_HUMAN	3.46	4.78	1	1		Acyl-protein thioesterase 1 OS=Homo sapiens OX=9606 GN=LYPLA1 PE=1 SV=1	30.3905	112.888	90.8274	74.7897	14.3267	39.6493	351.855	338.534	0.414979
864	TRUE	O14745|NHRF1_HUMAN	25.17	10.89	3	3		Na(+)/H(+) exchange regulatory cofactor NHE-RF1 OS=Homo sapiens OX=9606 GN=SLC9A3R1 PE=1 SV=4	78.2109	52.4981	75.7452	77.6568	251.728	328.929	86.5735	94.4582	0.373001
307	TRUE	Q96J02|ITCH_HUMAN	4.72	7.75	7	6		E3 ubiquitin-protein ligase Itchy homolog OS=Homo sapiens OX=9606 GN=ITCH PE=1 SV=2	147.697	164.33	109.592	118.277	207.917	182.433	71.2956	43.7253	1.06832
306	TRUE	Q9NZN4|EHD2_HUMAN	12.88	6.45	5	3	Oxidation (M)	EH domain-containing protein 2 OS=Homo sapiens OX=9606 GN=EHD2 PE=1 SV=2	65.2627	63.8403	84.6638	162.28	250.146	273.399	70.1592	69.2962	0.567189
566	TRUE	Q9UL25|RAB21_HUMAN	1.74	21.33	3	3		Ras-related protein Rab-21 OS=Homo sapiens OX=9606 GN=RAB21 PE=1 SV=3	125.713	127.611	252.696	86.1999	111.802	142.502	42.5785	116.307	1.43329
788	TRUE	Q9Y287|ITM2B_HUMAN	1.55	3.76	1	1		Integral membrane protein 2B OS=Homo sapiens OX=9606 GN=ITM2B PE=1 SV=1	66.4504	63.9526	303.296	253.035	155.105	90.6446	35.633	31.5795	2.1943
906	TRUE	Q9H190|SDCB2_HUMAN	9.68	10.96	3	3	Oxidation (M)	Syntenin-2 OS=Homo sapiens OX=9606 GN=SDCBP2 PE=1 SV=2	73.2228	71.8929	165.057	172.669	128.253	141.81	128.586	114.135	0.941608
357	TRUE	O14786|NRP1_HUMAN	1.73	4.66	3	3		Neuropilin-1 OS=Homo sapiens OX=9606 GN=NRP1 PE=1 SV=3	123.171	60.8303	232.797	259.287	96.2209	115.713	26.3361	79.264	2.12917
1215	TRUE	O95832|CLD1_HUMAN	2.07	14.69	2	2	Oxidation (M)	Claudin-1 OS=Homo sapiens OX=9606 GN=CLDN1 PE=1 SV=1	77.5062	88.5362	262.44	257.977	104.059	107.789	44.0379	45.6816	2.2763
244	TRUE	Q12959|DLG1_HUMAN	2.62	8.96	6	6		Disks large homolog 1 OS=Homo sapiens OX=9606 GN=DLG1 PE=1 SV=2	126.459	165.302	94.6763	151.41	178.786	161.348	69.2368	38.2541	1.20156
1083	TRUE	P09496|CLCA_HUMAN	38.97	11.69	2	2		Clathrin light chain A OS=Homo sapiens OX=9606 GN=CLTA PE=1 SV=1	184.714	283.365	151.367	194.15	64.148	45.2679	32.1134	29.9429	4.74477
1050	TRUE	Q7Z403|TMC6_HUMAN	4.88	4.47	3	3	Oxidation (M)	Transmembrane channel-like protein 6 OS=Homo sapiens OX=9606 GN=TMC6 PE=1 SV=2	35.7131	95.6701	162.763	200.144	108.966	234.256	78.1791	63.5982	1.01916
1450	TRUE	Q7L0Q8|RHOU_HUMAN	9.33	4.65	1	1		Rho-related GTP-binding protein RhoU OS=Homo sapiens OX=9606 GN=RHOU PE=1 SV=1	133.199	140.053	260.063	257.458	49.2093	9.2454	63.4708	64.0306	4.25247
753	TRUE	O75131|CPNE3_HUMAN	10.82	5.03	3	3		Copine-3 OS=Homo sapiens OX=9606 GN=CPNE3 PE=1 SV=1	152.96	129.758	225.357	202.584	74.6739	102.56	36.5706	46.0721	2.7346
116	TRUE	P25705|ATPA_HUMAN	12.59	8.68	4	4		ATP synthase subunit alpha, mitochondrial OS=Homo sapiens OX=9606 GN=ATP5F1A PE=1 SV=1	70.313	132.837	123.481	119.69	140.818	90.4032	147.929	140.583	0.858753
770	TRUE	P05121|PAI1_HUMAN	34.27	12.94	4	4	Oxidation (M)	Plasminogen activator inhibitor 1 OS=Homo sapiens OX=9606 GN=SERPINE1 PE=1 SV=1	263.229	179.608	151.08	177.07	76.4836	53.1508	31.5568	30.5527	4.02092
179	TRUE	Q15046|SYK_HUMAN	0.76	5.7	3	3	Oxidation (M)	Lysine--tRNA ligase OS=Homo sapiens OX=9606 GN=KARS1 PE=1 SV=3	153.187	130.988	156.326	166.525	108.533	76.6953	71.118	93.8282	1.7335
496	TRUE	P11413|G6PD_HUMAN	19.13	11.07	4	4		Glucose-6-phosphate 1-dehydrogenase OS=Homo sapiens OX=9606 GN=G6PD PE=1 SV=4	133.71	105.398	116.985	117.599	151.222	103.164	120.01	100.237	0.998017
775	TRUE	Q15642|CIP4_HUMAN	5.49	1.66	1	1		Cdc42-interacting protein 4 OS=Homo sapiens OX=9606 GN=TRIP10 PE=1 SV=3	0	894.114	0	0	20.8651	21.0527	5.62214	6.12392	16.6614
152	TRUE	P43490|NAMPT_HUMAN	3.48	8.35	3	3		Nicotinamide phosphoribosyltransferase OS=Homo sapiens OX=9606 GN=NAMPT PE=1 SV=1	82.7897	92.4975	193.609	149.333	104.786	55.9538	132.594	134.988	1.20991
1453	TRUE	Q8TC92|ENOX1_HUMAN	10.87	2.64	1	1	Carbamidomethylation; Oxidation (M)	Ecto-NOX disulfide-thiol exchanger 1 OS=Homo sapiens OX=9606 GN=ENOX1 PE=1 SV=1	149.526	126.899	89.9831	71.3541	75.7512	115.222	184.151	123.062	0.878711
161	TRUE	P63010|AP2B1_HUMAN	11.4	4.16	3	3		AP-2 complex subunit beta OS=Homo sapiens OX=9606 GN=AP2B1 PE=1 SV=1	21.8377	124.934	103.93	103.468	229.29	188.676	81.1535	74.7972	0.617109
291	TRUE	Q8N4S9|MALD2_HUMAN	7.83	8.24	4	4	Oxidation (M)	MARVEL domain-containing protein 2 OS=Homo sapiens OX=9606 GN=MARVELD2 PE=1 SV=2	79.8121	87.2392	145.067	150.687	166.837	160.576	67.6937	66.6408	1.00229
1442	TRUE	O43657|TSN6_HUMAN	6.82	5.31	1	1		Tetraspanin-6 OS=Homo sapiens OX=9606 GN=TSPAN6 PE=1 SV=1	57.8192	147.936	121.039	119.178	176.875	167.23	75.2133	46.3926	0.957617
807	TRUE	Q9Y4G6|TLN2_HUMAN	2.31	0.35	1	1		Talin-2 OS=Homo sapiens OX=9606 GN=TLN2 PE=1 SV=4	41.7881	15.5651	255.096	144.4	45.7934	17.0878	210.993	176.615	1.01412
76	TRUE	P14625|ENPL_HUMAN	1.34	9.22	7	6		Endoplasmin OS=Homo sapiens OX=9606 GN=HSP90B1 PE=1 SV=1	98.8158	78.7304	175.062	182.527	97.4463	106.536	64.9573	69.7268	1.58013
766	TRUE	O00220|TR10A_HUMAN	1.81	5.34	2	2	Oxidation (M)	Tumor necrosis factor receptor superfamily member 10A OS=Homo sapiens OX=9606 GN=TNFRSF10A PE=1 SV=3	164.613	62.1292	186.786	162.181	112.202	93.1321	48.714	39.3226	1.96239
633	TRUE	P30511|HLAF_HUMAN	17.4	13.29	3	3		HLA class I histocompatibility antigen, alpha chain F OS=Homo sapiens OX=9606 GN=HLA-F PE=1 SV=3	88.0179	80.826	88.5893	88.2317	183.677	202.808	67.4943	58.9939	0.673846
1419	TRUE	P01876|IGHA1_HUMAN	0.45	4.25	1	1		Immunoglobulin heavy constant alpha 1 OS=Homo sapiens OX=9606 GN=IGHA1 PE=1 SV=2	297.369	169.061	39.4087	51.0372	146.369	35.2707	34.8693	53.9181	2.05925
317	TRUE	Q9HCK8|CHD8_HUMAN	1.21	0.35	1	1	Acetylation (N-term)	Chromodomain-helicase-DNA-binding protein 8 OS=Homo sapiens OX=9606 GN=CHD8 PE=1 SV=5	79.1209	33.076	153.026	214.687	37.5931	40.8146	122.961	134.467	1.429
636	TRUE	O15144|ARPC2_HUMAN	22.4	7.67	2	2	Oxidation (M)	Actin-related protein 2/3 complex subunit 2 OS=Homo sapiens OX=9606 GN=ARPC2 PE=1 SV=1	115.69	97.9473	48.755	86.4469	103.239	118.069	128.19	117.17	0.747509
301	TRUE	P42892|ECE1_HUMAN	1.73	6.49	3	3	Oxidation (M)	Endothelin-converting enzyme 1 OS=Homo sapiens OX=9606 GN=ECE1 PE=1 SV=2	105.652	107.936	133.465	139.382	109.342	102.189	50.2047	63.9682	1.49349
1267	TRUE	Q9H1C7|CYTM1_HUMAN	14.35	11.34	2	2		Cysteine-rich and transmembrane domain-containing protein 1 OS=Homo sapiens OX=9606 GN=CYSTM1 PE=1 SV=1	148.154	21.0205	21.8667	73.5349	127.539	274.066	73.8861	66.4658	0.488186
139	TRUE	P27816|MAP4_HUMAN	2.75	1.13	1	1		Microtubule-associated protein 4 OS=Homo sapiens OX=9606 GN=MAP4 PE=1 SV=3	31.1612	20.6778	132.873	165.794	81.1259	53.4633	303.863	14.1584	0.774409
1126	TRUE	P49006|MRP_HUMAN	10.54	7.69	1	1		MARCKS-related protein OS=Homo sapiens OX=9606 GN=MARCKSL1 PE=1 SV=2	85.4618	23.4118	48.7257	76.4773	243.45	249.987	30.2784	43.4951	0.41268
582	TRUE	Q9ULV4|COR1C_HUMAN	8.39	7.59	2	2		Coronin-1C OS=Homo sapiens OX=9606 GN=CORO1C PE=1 SV=1	49.4661	117.535	126.814	95.0554	73.4906	97.3023	105.494	123.404	0.972927
230	TRUE	P30153|2AAA_HUMAN	24.24	13.41	6	6		Serine/threonine-protein phosphatase 2A 65 kDa regulatory subunit A alpha isoform OS=Homo sapiens OX=9606 GN=PPP2R1A PE=1 SV=4	75.3186	97.0307	104.696	70.2218	119.872	108.767	102.742	100.584	0.803925
1199	TRUE	Q08722|CD47_HUMAN	8.77	3.41	1	1		Leukocyte surface antigen CD47 OS=Homo sapiens OX=9606 GN=CD47 PE=1 SV=1	62.3079	66.9866	87.7436	105.027	103.824	254.077	45.6396	53.3039	0.704977
1517	TRUE	O75695|XRP2_HUMAN	10.61	2.86	1	1		Protein XRP2 OS=Homo sapiens OX=9606 GN=RP2 PE=1 SV=4	80.3965	74.9612	78.7754	75.3339	139.947	200.479	34.8245	57.0041	0.715937
555	TRUE	P62834|RAP1A_HUMAN	3.4	7.07	7	1	Oxidation (M)	Ras-related protein Rap-1A OS=Homo sapiens OX=9606 GN=RAP1A PE=1 SV=1	73.6244	148.304	66.9862	59.2061	232.545	67.7035	19.2519	71.3964	0.890569
662	TRUE	Q9Y289|SC5A6_HUMAN	0.44	1.73	1	1	Oxidation (M)	Sodium-dependent multivitamin transporter OS=Homo sapiens OX=9606 GN=SLC5A6 PE=2 SV=2	98.6377	90.9088	130.5	102.176	126.012	121.551	36.0033	31.0987	1.34182
347	TRUE	O15439|MRP4_HUMAN	11.95	3.7	4	4		Multidrug resistance-associated protein 4 OS=Homo sapiens OX=9606 GN=ABCC4 PE=1 SV=3	104.734	104.257	154.802	187.585	80.3534	48.4238	32.1621	22.9867	2.99782
538	TRUE	P51153|RAB13_HUMAN	6.03	6.9	1	1	Oxidation (M)	Ras-related protein Rab-13 OS=Homo sapiens OX=9606 GN=RAB13 PE=1 SV=1	102.376	117.496	77.6918	78.2556	192.173	73.7386	48.2985	43.2611	1.05133
68	TRUE	P08581|MET_HUMAN	2.88	1.73	2	2		Hepatocyte growth factor receptor OS=Homo sapiens OX=9606 GN=MET PE=1 SV=4	81.251	80.4593	195.899	122.037	121.861	51.6073	18.1124	52.7339	1.96323
255	TRUE	O43491|E41L2_HUMAN	15.25	3.88	3	3		Band 4.1-like protein 2 OS=Homo sapiens OX=9606 GN=EPB41L2 PE=1 SV=1	69.7638	82.099	84.1589	106.339	98.362	139.975	62.9338	70.8901	0.919929
805	TRUE	P61006|RAB8A_HUMAN	8.55	5.8	1	1		Ras-related protein Rab-8A OS=Homo sapiens OX=9606 GN=RAB8A PE=1 SV=1	45.4264	40.0138	102.206	134.208	170.244	112.268	55.4084	51.5116	0.826469
166	TRUE	P54760|EPHB4_HUMAN	3.88	2.23	4	1	Carbamidomethylation	Ephrin type-B receptor 4 OS=Homo sapiens OX=9606 GN=EPHB4 PE=1 SV=2	60.2736	151.53	39.799	287.384	65.1982	21.8639	52.0135	26.0933	3.26324
258	TRUE	P38606|VATA_HUMAN	10.1	6.32	3	3		V-type proton ATPase catalytic subunit A OS=Homo sapiens OX=9606 GN=ATP6V1A PE=1 SV=2	65.996	64.0123	89.8035	121.192	105.47	61.6059	89.1521	106.344	0.940516
1200	TRUE	O95858|TSN15_HUMAN	5.79	6.8	2	2	Oxidation (M)	Tetraspanin-15 OS=Homo sapiens OX=9606 GN=TSPAN15 PE=1 SV=1	76.4125	17.4214	24.3404	90.483	234.985	209.443	12.5395	24.6852	0.433211
109	TRUE	Q8IWT6|LRC8A_HUMAN	2.88	5.31	4	4		Volume-regulated anion channel subunit LRRC8A OS=Homo sapiens OX=9606 GN=LRRC8A PE=1 SV=1	56.6447	59.1158	133.718	144.515	108.728	90.89	46.0485	47.328	1.34471
565	TRUE	Q9Y4F1|FARP1_HUMAN	30.54	3.83	3	3		FERM, ARHGEF and pleckstrin domain-containing protein 1 OS=Homo sapiens OX=9606 GN=FARP1 PE=1 SV=1	50.5748	38.273	40.3107	34.6821	178.227	212.661	53.1942	67.6414	0.320174
1080	TRUE	P0C0L4|CO4A_HUMAN	0.4	1.55	2	2		Complement C4-A OS=Homo sapiens OX=9606 GN=C4A PE=1 SV=2	16.0278	37.5257	200.369	218.341	74.4368	52.2088	33.8789	34.6101	2.42019
1013	TRUE	P49755|TMEDA_HUMAN	17.06	9.59	2	2		Transmembrane emp24 domain-containing protein 10 OS=Homo sapiens OX=9606 GN=TMED10 PE=1 SV=2	56.7053	48.5104	69.4797	76.4383	86.1183	72.7852	129.715	125.883	0.605868
1229	TRUE	Q9UP38|FZD1_HUMAN	0.2	2.01	1	1		Frizzled-1 OS=Homo sapiens OX=9606 GN=FZD1 PE=1 SV=2	0	493.6	14.5288	11.5635	52.3851	45.3354	25.9507	11.4301	3.84669
39	TRUE	P08670|VIME_HUMAN	16.18	18.45	11	7	Oxidation (M)	Vimentin OS=Homo sapiens OX=9606 GN=VIM PE=1 SV=4	128.63	109.851	123.317	198.61	18.5447	8.25556	32.9722	32.1045	6.09954
708	TRUE	P50148|GNAQ_HUMAN	9.74	4.18	2	1		Guanine nucleotide-binding protein G(q) subunit alpha OS=Homo sapiens OX=9606 GN=GNAQ PE=1 SV=4	34.7339	64.0633	91.9488	105.627	61.9156	132.481	82.2429	76.1447	0.840098
332	TRUE	P56199|ITA1_HUMAN	27.24	1.02	1	1		Integrin alpha-1 OS=Homo sapiens OX=9606 GN=ITGA1 PE=1 SV=2	76.9713	83.5745	41.6414	29.1079	178.552	89.7867	66.8871	72.8026	0.56686
651	TRUE	P54707|AT12A_HUMAN	0.16	1.44	3	1		Potassium-transporting ATPase alpha chain 2 OS=Homo sapiens OX=9606 GN=ATP12A PE=1 SV=3	91.4194	13.3101	159.134	130.17	14.3577	16.3605	101.208	108.835	1.63662
679	TRUE	Q13444|ADA15_HUMAN	8.68	1.74	1	1		Disintegrin and metalloproteinase domain-containing protein 15 OS=Homo sapiens OX=9606 GN=ADAM15 PE=1 SV=4	109.892	107.071	85.1633	119.885	66.0234	62.9823	37.6091	46.1492	1.98348
690	TRUE	O75083|WDR1_HUMAN	13.12	8.58	3	3		WD repeat-containing protein 1 OS=Homo sapiens OX=9606 GN=WDR1 PE=1 SV=4	78.2074	85.4765	69.0011	64.5092	72.6029	58.7362	104.964	99.5423	0.884914
14	TRUE	P07814|SYEP_HUMAN	3.63	2.98	3	3		Bifunctional glutamate/proline--tRNA ligase OS=Homo sapiens OX=9606 GN=EPRS1 PE=1 SV=5	67.0206	59.837	81.0401	100.745	63.2103	25.1056	111.786	120.824	0.961726
795	TRUE	P07948|LYN_HUMAN	10.97	6.25	3	3		Tyrosine-protein kinase Lyn OS=Homo sapiens OX=9606 GN=LYN PE=1 SV=3	48.9651	59.8984	94.4705	86.4576	102.785	114.622	37.9756	81.8699	0.859271
1211	TRUE	Q8NFJ5|RAI3_HUMAN	8.91	3.64	1	1		Retinoic acid-induced protein 3 OS=Homo sapiens OX=9606 GN=GPRC5A PE=1 SV=2	38.0967	47.3352	70.0202	68.8641	169.237	168.473	29.0294	30.9288	0.564079
747	TRUE	P62070|RRAS2_HUMAN	0.23	12.75	3	2		Ras-related protein R-Ras2 OS=Homo sapiens OX=9606 GN=RRAS2 PE=1 SV=1	142.501	75.1396	75.5205	54.8335	147.929	83.0946	25.8104	15.2634	1.27893
849	TRUE	P62879|GBB2_HUMAN	5.4	5.59	4	1	Carbamidomethylation	Guanine nucleotide-binding protein G(I)/G(S)/G(T) subunit beta-2 OS=Homo sapiens OX=9606 GN=GNB2 PE=1 SV=3	263.769	253.605	12.7364	13.0445	18.1235	19.4399	9.0371	11.5	9.34853
1455	TRUE	Q15836|VAMP3_HUMAN	6.22	24	1	1		Vesicle-associated membrane protein 3 OS=Homo sapiens OX=9606 GN=VAMP3 PE=1 SV=3	49.2153	107.706	84.0697	91.2893	91.6199	67.3269	43.5261	62.403	1.25448
1455	TRUE	P63027|VAMP2_HUMAN	6.22	20.69	1	1		Vesicle-associated membrane protein 2 OS=Homo sapiens OX=9606 GN=VAMP2 PE=1 SV=3	49.2153	107.706	84.0697	91.2893	91.6199	67.3269	43.5261	62.403	1.25448
1218	TRUE	Q9H254|SPTN4_HUMAN	17.93	0.43	1	1		Spectrin beta chain, non-erythrocytic 4 OS=Homo sapiens OX=9606 GN=SPTBN4 PE=1 SV=2	52.9487	55.0348	36.0486	25.7835	89.8148	40.8704	159.337	136.103	0.398511
857	TRUE	O15431|COPT1_HUMAN	7.19	10	1	1	Oxidation (M)	High affinity copper uptake protein 1 OS=Homo sapiens OX=9606 GN=SLC31A1 PE=1 SV=1	80.3812	26.9123	55.8711	47.3374	43.0638	266.478	32.104	39.8889	0.551724
479	TRUE	P01111|RASN_HUMAN	7.06	4.76	7	1		GTPase NRas OS=Homo sapiens OX=9606 GN=NRAS PE=1 SV=1	75.3181	83.5182	71.8095	8.19658	166.819	127.596	30.5444	26.4481	0.679674
754	TRUE	P07093|GDN_HUMAN	17.57	11.56	4	4		Glia-derived nexin OS=Homo sapiens OX=9606 GN=SERPINE2 PE=1 SV=1	77.6421	88.2817	138.852	205.179	46.0562	22.6893	5.68922	5.73272	6.36112
446	TRUE	O60443|GSDME_HUMAN	5.55	2.22	1	1		Gasdermin-E OS=Homo sapiens OX=9606 GN=GSDME PE=1 SV=2	31.3065	61.6031	101.415	67.8303	87.714	164.164	42.6033	24.1326	0.822801
1343	TRUE	Q9BSK0|MALD1_HUMAN	0.14	5.78	1	1		MARVEL domain-containing protein 1 OS=Homo sapiens OX=9606 GN=MARVELD1 PE=1 SV=1	41.0424	95.9764	77.0918	98.8685	120.384	97.032	10.2963	33.5035	1.19816
693	TRUE	P09497|CLCB_HUMAN	0.45	16.59	4	4		Clathrin light chain B OS=Homo sapiens OX=9606 GN=CLTB PE=1 SV=1	94.2006	85.5208	107.187	72.1793	46.0537	74.3832	51.1954	39.4971	1.70079
1493	TRUE	P56749|CLD12_HUMAN	2	6.15	1	1		Claudin-12 OS=Homo sapiens OX=9606 GN=CLDN12 PE=1 SV=1	58.939	56.5402	50.3458	56.42	153.777	132.901	33.5277	6.30723	0.680664
672	TRUE	P01116|RASK_HUMAN	10.82	4.76	6	1		GTPase KRas OS=Homo sapiens OX=9606 GN=KRAS PE=1 SV=1	49.6423	52.7906	55.524	35.5517	160.734	133.833	30.8715	24.1434	0.553543
1275	TRUE	P06310|KV230_HUMAN	4.6	10.83	1	1		Immunoglobulin kappa variable 2-30 OS=Homo sapiens OX=9606 GN=IGKV2-30 PE=3 SV=2	117.973	97.9611	62.3433	64.0948	14.5112	150.336	8.74559	26.5388	1.71074
1275	TRUE	P01615|KVD28_HUMAN	4.6	10.83	1	1		Immunoglobulin kappa variable 2D-28 OS=Homo sapiens OX=9606 GN=IGKV2D-28 PE=1 SV=2	117.973	97.9611	62.3433	64.0948	14.5112	150.336	8.74559	26.5388	1.71074
1275	TRUE	A0A087WW87|KV240_HUMAN	4.6	10.74	1	1		Immunoglobulin kappa variable 2-40 OS=Homo sapiens OX=9606 GN=IGKV2-40 PE=3 SV=2	117.973	97.9611	62.3433	64.0948	14.5112	150.336	8.74559	26.5388	1.71074
1275	TRUE	A0A075B6P5|KV228_HUMAN	4.6	10.83	1	1		Immunoglobulin kappa variable 2-28 OS=Homo sapiens OX=9606 GN=IGKV2-28 PE=3 SV=1	117.973	97.9611	62.3433	64.0948	14.5112	150.336	8.74559	26.5388	1.71074
1275	TRUE	A0A075B6S6|KVD30_HUMAN	4.6	10.83	1	1		Immunoglobulin kappa variable 2D-30 OS=Homo sapiens OX=9606 GN=IGKV2D-30 PE=3 SV=1	117.973	97.9611	62.3433	64.0948	14.5112	150.336	8.74559	26.5388	1.71074
1275	TRUE	A2NJV5|KV229_HUMAN	4.6	10.83	1	1		Immunoglobulin kappa variable 2-29 OS=Homo sapiens OX=9606 GN=IGKV2-29 PE=3 SV=2	117.973	97.9611	62.3433	64.0948	14.5112	150.336	8.74559	26.5388	1.71074
1275	TRUE	A0A0A0MRZ7|KVD26_HUMAN	4.6	10.83	1	1		Immunoglobulin kappa variable 2D-26 OS=Homo sapiens OX=9606 GN=IGKV2D-26 PE=3 SV=1	117.973	97.9611	62.3433	64.0948	14.5112	150.336	8.74559	26.5388	1.71074
1275	TRUE	P01614|KVD40_HUMAN	4.6	10.74	1	1		Immunoglobulin kappa variable 2D-40 OS=Homo sapiens OX=9606 GN=IGKV2D-40 PE=1 SV=2	117.973	97.9611	62.3433	64.0948	14.5112	150.336	8.74559	26.5388	1.71074
1275	TRUE	A0A075B6S2|KVD29_HUMAN	4.6	10.83	1	1		Immunoglobulin kappa variable 2D-29 OS=Homo sapiens OX=9606 GN=IGKV2D-29 PE=3 SV=1	117.973	97.9611	62.3433	64.0948	14.5112	150.336	8.74559	26.5388	1.71074
74	TRUE	P08069|IGF1R_HUMAN	2.24	1.61	2	2		Insulin-like growth factor 1 receptor OS=Homo sapiens OX=9606 GN=IGF1R PE=1 SV=1	74.9915	40.2713	85.0171	107.827	64.1857	92.0085	30.9257	38.3922	1.36626
275	TRUE	O14936|CSKP_HUMAN	16.61	7.67	5	5		Peripheral plasma membrane protein CASK OS=Homo sapiens OX=9606 GN=CASK PE=1 SV=3	27.1882	37.9482	55.4759	45.6488	127.907	156.35	36.9747	37.8679	0.462995
252	TRUE	P55290|CAD13_HUMAN	29.32	5.19	3	3		Cadherin-13 OS=Homo sapiens OX=9606 GN=CDH13 PE=1 SV=1	101.924	97.4265	192.416	88.4347	9.46946	9.82519	13.897	11.3736	10.7753
605	TRUE	Q9Y653|AGRG1_HUMAN	0.35	6.64	3	3		Adhesion G-protein coupled receptor G1 OS=Homo sapiens OX=9606 GN=ADGRG1 PE=1 SV=2	0	65.3989	106.469	102.334	115.189	62.5718	37.8919	31.8281	1.10797
1562	TRUE	Q86VH4|LRRT4_HUMAN	9.38	1.86	1	1		Leucine-rich repeat transmembrane neuronal protein 4 OS=Homo sapiens OX=9606 GN=LRRTM4 PE=2 SV=2	125.993	78.4559	80.2665	83.5325	59.006	63.0404	13.6972	11.5783	2.49962
808	TRUE	P63098|CANB1_HUMAN	2.17	14.12	2	2		Calcineurin subunit B type 1 OS=Homo sapiens OX=9606 GN=PPP3R1 PE=1 SV=2	73.3866	52.701	94.5991	103.866	78.2476	72.8028	15.713	23.3085	1.70752
1183	TRUE	P07204|TRBM_HUMAN	1.71	3.48	1	1		Thrombomodulin OS=Homo sapiens OX=9606 GN=THBD PE=1 SV=2	71.498	68.5135	83.3475	96.1551	72.2994	71.2756	26.506	22.2742	1.66106
547	TRUE	P01112|RASH_HUMAN	4.97	4.76	6	1		GTPase HRas OS=Homo sapiens OX=9606 GN=HRAS PE=1 SV=1	63.2181	50.036	55.3075	58.4426	93.8842	138.427	27.8918	18.7593	0.813746
1445	TRUE	O15162|PLS1_HUMAN	7.17	6.29	1	1		Phospholipid scramblase 1 OS=Homo sapiens OX=9606 GN=PLSCR1 PE=1 SV=1	44.5104	50.2731	69.8476	102.579	90.5144	55.9099	40.8629	50.3367	1.12451
316	TRUE	Q16555|DPYL2_HUMAN	12.87	7.52	3	3	Oxidation (M)	Dihydropyrimidinase-related protein 2 OS=Homo sapiens OX=9606 GN=DPYSL2 PE=1 SV=1	77.5012	80.1295	31.6974	48.8791	80.3233	102.17	42.51	30.8765	0.930933
978	TRUE	Q9C0H2|TTYH3_HUMAN	1.52	4.59	2	2		Protein tweety homolog 3 OS=Homo sapiens OX=9606 GN=TTYH3 PE=1 SV=3	93.6014	58.2416	57.8268	61.0418	153.487	7.78263	39.9203	18.7305	1.23095
719	TRUE	P06703|S10A6_HUMAN	8.4	10	1	1	Oxidation (M)	Protein S100-A6 OS=Homo sapiens OX=9606 GN=S100A6 PE=1 SV=1	36.6798	27.5285	70.0485	70.6455	65.0098	33.8403	128.092	55.8246	0.724633
176	TRUE	O94832|MYO1D_HUMAN	27.95	4.17	3	3		Unconventional myosin-Id OS=Homo sapiens OX=9606 GN=MYO1D PE=1 SV=2	38.8003	54.0249	28.3342	56.8893	114.318	90.322	50.7117	48.3162	0.586327
1397	TRUE	Q14802|FXYD3_HUMAN	12.01	21.84	1	1		FXYD domain-containing ion transport regulator 3 OS=Homo sapiens OX=9606 GN=FXYD3 PE=1 SV=1	29.1712	38.775	70.5623	76.1826	65.7974	96.7949	54.3602	49.3383	0.806228
710	TRUE	Q9H2J7|S6A15_HUMAN	11.82	5.75	3	3		Sodium-dependent neutral amino acid transporter B(0)AT2 OS=Homo sapiens OX=9606 GN=SLC6A15 PE=1 SV=1	76.2252	83.3543	93.5114	97.7939	41.3792	53.3628	21.4798	12.7857	2.71988
308	TRUE	O60603|TLR2_HUMAN	1.72	2.93	2	2	Oxidation (M)	Toll-like receptor 2 OS=Homo sapiens OX=9606 GN=TLR2 PE=1 SV=1	74.7112	75.332	44.5766	96.9837	54.8692	63.1111	37.1744	32.0544	1.55764
396	TRUE	P08865|RSSA_HUMAN	19.33	9.83	2	2	Acetylation (N-term); Oxidation (M)	40S ribosomal protein SA OS=Homo sapiens OX=9606 GN=RPSA PE=1 SV=4	0	0	55.5522	54.379	0	0	210.715	152.74	0.302462
53	TRUE	Q9Y490|TLN1_HUMAN	3.53	0.55	1	1		Talin-1 OS=Homo sapiens OX=9606 GN=TLN1 PE=1 SV=3	46.3016	9.29444	104.145	112.771	72.0766	41.7406	40.2106	45.0475	1.36889
804	TRUE	P30626|SORCN_HUMAN	8	11.11	2	2		Sorcin OS=Homo sapiens OX=9606 GN=SRI PE=1 SV=1	55.3445	62.2573	52.1096	54.2883	31.4354	56.0256	82.9954	75.3907	0.911134
905	TRUE	Q04760|LGUL_HUMAN	9.84	9.78	2	2	Oxidation (M)	Lactoylglutathione lyase OS=Homo sapiens OX=9606 GN=GLO1 PE=1 SV=4	82.537	62.2885	26.1843	28.1754	31.0879	49.2117	95.4156	86.9075	0.758446
85	TRUE	Q03001|DYST_HUMAN	16.95	0.12	1	1		Dystonin OS=Homo sapiens OX=9606 GN=DST PE=1 SV=4	40.6008	52.9296	0	0	229.193	128.974	0	0	0.261137
106	TRUE	Q92817|EVPL_HUMAN	37.76	6.49	10	10		Envoplakin OS=Homo sapiens OX=9606 GN=EVPL PE=1 SV=3	0	0	0	0	20.0363	24.2127	172.845	226.761	0
712	TRUE	P13929|ENOB_HUMAN	1.72	3.23	1	1	Oxidation (M)	Beta-enolase OS=Homo sapiens OX=9606 GN=ENO3 PE=1 SV=5	47.6359	61.4566	99.9516	54.6855	29.9243	53.9742	51.0338	42.2437	1.48852
243	TRUE	Q9UJZ1|STML2_HUMAN	0.92	7.3	2	2		Stomatin-like protein 2, mitochondrial OS=Homo sapiens OX=9606 GN=STOML2 PE=1 SV=1	66.9708	36.9895	148.901	47.4592	38.0151	38.8379	29.4637	34.0861	2.139
1408	TRUE	Q96FX8|PERP_HUMAN	1.77	8.81	1	1		p53 apoptosis effector related to PMP-22 OS=Homo sapiens OX=9606 GN=PERP PE=1 SV=1	57.4745	58.1852	33.4865	33.8682	80.6136	145.048	10.9499	10.3317	0.741121
1173	TRUE	Q8N474|SFRP1_HUMAN	56.6	3.18	1	1		Secreted frizzled-related protein 1 OS=Homo sapiens OX=9606 GN=SFRP1 PE=1 SV=1	73.4528	54.0389	151.843	149.379	0	0	0	0	#DIV/0!
1523	TRUE	Q86VE9|SERC5_HUMAN	0.65	2.36	1	1		Serine incorporator 5 OS=Homo sapiens OX=9606 GN=SERINC5 PE=2 SV=1	74.6463	70.3177	30.0573	53.6202	86.9967	81.5935	17.7917	11.2876	1.15669
418	TRUE	P35241|RADI_HUMAN	20.79	4.46	6	2	Oxidation (M)	Radixin OS=Homo sapiens OX=9606 GN=RDX PE=1 SV=1	16.7661	30.258	46.1643	39.5236	104.763	74.0259	36.6986	72.7077	0.460493
365	TRUE	Q9BZQ8|NIBA1_HUMAN	16.83	1.51	1	1		Protein Niban 1 OS=Homo sapiens OX=9606 GN=NIBAN1 PE=1 SV=1	23.3838	34.2648	28.1168	27.1566	120.374	127.817	17.7979	34.6951	0.37555
797	TRUE	P17813|EGLN_HUMAN	6.42	3.34	2	2		Endoglin OS=Homo sapiens OX=9606 GN=ENG PE=1 SV=2	69.9457	100.334	71.6346	40.7263	74.5258	39.8801	10.0828	5.2807	2.17802
658	TRUE	Q9H6B4|CLMP_HUMAN	3.31	6.97	1	1		CXADR-like membrane protein OS=Homo sapiens OX=9606 GN=CLMP PE=1 SV=1	75.9102	74.4333	66.4554	15.2652	58.1902	72.8497	22.9609	24.4355	1.30054
1007	TRUE	P54920|SNAA_HUMAN	15.98	10.51	2	2		Alpha-soluble NSF attachment protein OS=Homo sapiens OX=9606 GN=NAPA PE=1 SV=3	20.213	34.8294	48.8842	52.3605	62.8666	52.0605	52.1545	81.2192	0.629426
903	TRUE	P07602|SAP_HUMAN	4.06	2.48	1	1		Prosaposin OS=Homo sapiens OX=9606 GN=PSAP PE=1 SV=2	26.0316	35.2973	65.9932	67.1169	83.3856	78.0876	15.1815	26.0965	0.959003
419	TRUE	Q15084|PDIA6_HUMAN	5.22	9.77	3	3		Protein disulfide-isomerase A6 OS=Homo sapiens OX=9606 GN=PDIA6 PE=1 SV=1	19.97	18.8941	67.8742	89.3327	41.7586	23.2673	64.7012	70.7001	0.978266
878	TRUE	Q99828|CIB1_HUMAN	3.5	15.18	2	2		Calcium and integrin-binding protein 1 OS=Homo sapiens OX=9606 GN=CIB1 PE=1 SV=4	26.7138	29.776	92.2842	40.5653	91.8754	78.4215	12.1476	22.5867	0.923466
1583	TRUE	Q16563|SYPL1_HUMAN	1.85	4.25	1	1		Synaptophysin-like protein 1 OS=Homo sapiens OX=9606 GN=SYPL1 PE=1 SV=1	71.2955	25.7143	70.6449	83.9611	70.4391	40.2454	13.7382	15.2085	1.802
1025	TRUE	P00918|CAH2_HUMAN	7.05	5	1	1		Carbonic anhydrase 2 OS=Homo sapiens OX=9606 GN=CA2 PE=1 SV=2	184.42	13.4563	69.4523	84.806	9.08126	0	11.0411	16.6749	9.56959
1373	TRUE	P01034|CYTC_HUMAN	2.44	7.53	1	1		Cystatin-C OS=Homo sapiens OX=9606 GN=CST3 PE=1 SV=1	31.6334	33.9556	92.8395	72.8381	18.2384	0	64.2383	72.2432	1.49474
1492	TRUE	Q9NRY6|PLS3_HUMAN	1.79	6.78	1	1		Phospholipid scramblase 3 OS=Homo sapiens OX=9606 GN=PLSCR3 PE=1 SV=2	37.3611	44.6345	45.7171	81.7031	33.8112	79.36	20.5249	25.8849	1.31229
129	TRUE	P05141|ADT2_HUMAN	15.91	6.71	2	2		ADP/ATP translocase 2 OS=Homo sapiens OX=9606 GN=SLC25A5 PE=1 SV=7	57.2809	56.9872	31.7991	27.7654	92.1203	41.7	28.1042	31.3639	0.899343
676	TRUE	O95716|RAB3D_HUMAN	26.62	6.85	1	1		Ras-related protein Rab-3D OS=Homo sapiens OX=9606 GN=RAB3D PE=1 SV=1	26.4122	28.6224	25.8026	50.6726	74.0615	62.5987	50.4766	47.6622	0.560095
718	TRUE	Q8IZP0|ABI1_HUMAN	8.01	3.15	1	1		Abl interactor 1 OS=Homo sapiens OX=9606 GN=ABI1 PE=1 SV=4	0	0	39.3237	53.7983	60.6629	123.069	47.8572	32.4958	0.352621
777	TRUE	P25445|TNR6_HUMAN	0.86	8.96	3	3		Tumor necrosis factor receptor superfamily member 6 OS=Homo sapiens OX=9606 GN=FAS PE=1 SV=1	53.068	48.4825	61.554	46.4435	15.7663	51.2652	39.9254	39.7565	1.42828
1146	TRUE	O94985|CSTN1_HUMAN	2.24	3.36	2	2		Calsyntenin-1 OS=Homo sapiens OX=9606 GN=CLSTN1 PE=1 SV=1	55.3242	62.0901	55.4977	50.6961	49.1163	33.9824	13.9117	32.9075	1.72115
115	TRUE	Q8IZJ1|UNC5B_HUMAN	5.29	2.43	2	2		Netrin receptor UNC5B OS=Homo sapiens OX=9606 GN=UNC5B PE=1 SV=2	36.7578	19.6522	63.5879	63.398	51.68	34.3703	30.0082	36.7478	1.20019
1175	TRUE	P32970|CD70_HUMAN	1.4	12.44	2	2		CD70 antigen OS=Homo sapiens OX=9606 GN=CD70 PE=1 SV=2	67.3379	11.2937	81.7159	83.0232	19.9588	24.1581	21.3658	26.5181	2.64531
143	TRUE	P13637|AT1A3_HUMAN	4.84	2.27	14	1	Carbamidomethylation	Sodium/potassium-transporting ATPase subunit alpha-3 OS=Homo sapiens OX=9606 GN=ATP1A3 PE=1 SV=3	55.7413	70.2084	33.5638	53.6286	22.7921	32.3594	19.7812	28.03	2.07009
627	TRUE	P27797|CALR_HUMAN	3.52	7.91	3	3		Calreticulin OS=Homo sapiens OX=9606 GN=CALR PE=1 SV=1	0	0	36.5524	21.4374	14.1042	24.2668	113.669	102.111	0.228171
1121	TRUE	P08758|ANXA5_HUMAN	14.64	5	1	1		Annexin A5 OS=Homo sapiens OX=9606 GN=ANXA5 PE=1 SV=2	19.2508	21.3316	15.8236	28.6607	25.4294	26.2954	89.7913	77.6536	0.388132
1068	TRUE	Q9BXS9|S26A6_HUMAN	7.63	4.35	2	2	Oxidation (M)	Solute carrier family 26 member 6 OS=Homo sapiens OX=9606 GN=SLC26A6 PE=1 SV=1	20.142	45.9305	91.5715	98.4417	15.2099	23.1058	0	7.40045	5.60165
689	TRUE	Q96BM9|ARL8A_HUMAN	15.92	8.06	1	1		ADP-ribosylation factor-like protein 8A OS=Homo sapiens OX=9606 GN=ARL8A PE=1 SV=1	24.7568	21.0755	33.5077	28.2062	54.5944	22.3999	56.97	59.2297	0.556674
659	TRUE	Q01844|EWS_HUMAN	5.11	2.13	1	1		RNA-binding protein EWS OS=Homo sapiens OX=9606 GN=EWSR1 PE=1 SV=1	63.6867	51.5097	35.5371	49.7325	24.6122	33.5663	13.2417	28.3659	2.00896
303	TRUE	O95817|BAG3_HUMAN	41.34	2.43	1	1		BAG family molecular chaperone regulator 3 OS=Homo sapiens OX=9606 GN=BAG3 PE=1 SV=3	23.7384	22.0437	22.7852	22.8668	63.3899	44.0653	45.3713	50.2125	0.450328
1340	TRUE	Q96L46|CPNS2_HUMAN	20.23	5.24	1	1	Oxidation (M)	Calpain small subunit 2 OS=Homo sapiens OX=9606 GN=CAPNS2 PE=1 SV=2	0	0	9.39373	0	235.351	8.36347	20.3647	19.2179	0.0331586
167	TRUE	P13010|XRCC5_HUMAN	10.27	3.01	2	2		X-ray repair cross-complementing protein 5 OS=Homo sapiens OX=9606 GN=XRCC5 PE=1 SV=3	66.5712	36.4174	72.2511	64.9491	0	14.6891	16.4507	19.2941	4.76245
533	TRUE	P21796|VDAC1_HUMAN	22.99	3.89	1	1		Voltage-dependent anion-selective channel protein 1 OS=Homo sapiens OX=9606 GN=VDAC1 PE=1 SV=2	27.26	26.7964	33.4484	25.3374	56.3473	67.3444	21.5047	32.3931	0.63541
1073	TRUE	Q9Y5Y0|FLVC1_HUMAN	9.03	4.68	2	2		Feline leukemia virus subgroup C receptor-related protein 1 OS=Homo sapiens OX=9606 GN=FLVCR1 PE=1 SV=1	50.1483	51.7174	54.3291	50.1619	24.6182	25.9409	23.1095	6.26986	2.58145
701	TRUE	Q9P289|STK26_HUMAN	14.59	6.01	2	2		Serine/threonine-protein kinase 26 OS=Homo sapiens OX=9606 GN=STK26 PE=1 SV=2	21.7726	18.3714	39.5603	36.3717	63.1505	55.8549	21.429	28.4947	0.687129
872	TRUE	O43865|SAHH2_HUMAN	0.67	2.26	1	1		S-adenosylhomocysteine hydrolase-like protein 1 OS=Homo sapiens OX=9606 GN=AHCYL1 PE=1 SV=2	39.9819	45.4071	39.0253	50.2324	30.9576	10.1726	24.4987	42.4808	1.61546
355	TRUE	Q96PD2|DCBD2_HUMAN	8.92	1.55	1	1		Discoidin, CUB and LCCL domain-containing protein 2 OS=Homo sapiens OX=9606 GN=DCBLD2 PE=1 SV=1	50.5323	46.9359	68.7858	35.5779	34.8976	27.6138	9.99931	5.25538	2.59537
764	TRUE	Q15691|MARE1_HUMAN	10.95	2.99	1	1		Microtubule-associated protein RP/EB family member 1 OS=Homo sapiens OX=9606 GN=MAPRE1 PE=1 SV=3	16.5651	0	27.9131	23.3167	40.1515	19.3399	83.5147	68.7527	0.320151
416	TRUE	Q16181|SEPT7_HUMAN	2	2.75	1	1		Septin-7 OS=Homo sapiens OX=9606 GN=SEPTIN7 PE=1 SV=2	31.5751	36.5853	52.7523	43.0853	29.6164	20.8753	41.7528	23.125	1.4215
1464	TRUE	Q6ZUX7|LHPL2_HUMAN	6.47	10.96	1	1		LHFPL tetraspan subfamily member 2 protein OS=Homo sapiens OX=9606 GN=LHFPL2 PE=1 SV=2	16.0666	30.1108	46.5612	43.342	59.6466	43.388	17.1984	20.1279	0.969504
698	TRUE	P29992|GNA11_HUMAN	2.14	3.62	2	1		Guanine nucleotide-binding protein subunit alpha-11 OS=Homo sapiens OX=9606 GN=GNA11 PE=1 SV=2	0	0	53.8117	30.6667	73.964	78.3837	14.0245	23.6885	0.444481
1524	TRUE	P62166|NCS1_HUMAN	1.57	6.84	1	1		Neuronal calcium sensor 1 OS=Homo sapiens OX=9606 GN=NCS1 PE=1 SV=2	28.5708	35.4137	36.4733	41.5399	60.4365	41.4111	22.6776	6.63928	1.08259
910	TRUE	P21283|VATC1_HUMAN	1.74	4.19	1	1		V-type proton ATPase subunit C 1 OS=Homo sapiens OX=9606 GN=ATP6V1C1 PE=1 SV=4	22.6934	23.9332	40.3305	70.8542	36.8167	34.0831	14.2128	20.6863	1.49162
395	TRUE	Q06481|APLP2_HUMAN	7.1	1.83	1	1	Oxidation (M)	Amyloid-like protein 2 OS=Homo sapiens OX=9606 GN=APLP2 PE=1 SV=2	20.0066	24.9013	20.5471	23.7834	14.9911	13.3777	85.5356	55.8618	0.525655
194	TRUE	Q9NXE4|NSMA3_HUMAN	0.15	1.27	1	1		Sphingomyelin phosphodiesterase 4 OS=Homo sapiens OX=9606 GN=SMPD4 PE=1 SV=3	38.2623	26.4716	69.512	20.1967	30.2791	38.3726	6.10573	26.6992	1.52225
1016	TRUE	P14174|MIF_HUMAN	1.94	9.57	1	1	Oxidation (M)	Macrophage migration inhibitory factor OS=Homo sapiens OX=9606 GN=MIF PE=1 SV=4	44.6341	40.9225	23.9122	29.3248	21.6975	10.287	33.972	48.9312	1.20808
622	TRUE	Q96CW1|AP2M1_HUMAN	15.65	2.3	1	1		AP-2 complex subunit mu OS=Homo sapiens OX=9606 GN=AP2M1 PE=1 SV=2	22.1871	16.417	36.8589	31.3712	58.0994	37.5785	24.4251	25.6105	0.73318
237	TRUE	Q96J84|KIRR1_HUMAN	2.05	1.45	1	1		Kin of IRRE-like protein 1 OS=Homo sapiens OX=9606 GN=KIRREL1 PE=1 SV=2	43.6803	45.8721	26.1873	37.6275	34.8191	43.936	8.73301	9.32708	1.58412
272	TRUE	Q9NPH3|IL1AP_HUMAN	2.98	3.68	2	2		Interleukin-1 receptor accessory protein OS=Homo sapiens OX=9606 GN=IL1RAP PE=1 SV=2	0	20.0809	36.9998	35.3937	72.0488	59.8178	17.4457	7.89602	0.588229
1508	TRUE	Q9BV40|VAMP8_HUMAN	9.31	12	1	1		Vesicle-associated membrane protein 8 OS=Homo sapiens OX=9606 GN=VAMP8 PE=1 SV=1	27.3007	23.8798	34.3689	25.3973	52.6406	48.501	12.4175	17.901	0.843957
1021	TRUE	P02675|FIBB_HUMAN	5.96	8.55	3	3		Fibrinogen beta chain OS=Homo sapiens OX=9606 GN=FGB PE=1 SV=2	17.987	22.3577	27.6441	22.4285	13.9093	11.7498	65.2197	60.3518	0.597878
579	TRUE	Q9UHX3|AGRE2_HUMAN	8.53	1.82	1	1	Oxidation (M)	Adhesion G protein-coupled receptor E2 OS=Homo sapiens OX=9606 GN=ADGRE2 PE=1 SV=2	27.5707	32.7879	37.8057	74.9452	35.7004	11.4132	5.62654	8.37425	2.83255
222	TRUE	Q14118|DAG1_HUMAN	7.42	1.23	1	1		Dystroglycan OS=Homo sapiens OX=9606 GN=DAG1 PE=1 SV=2	30.3528	37.3021	51.5819	42.7855	10.5821	14.4841	17.837	17.1131	2.69964
1107	TRUE	O95197|RTN3_HUMAN	14.66	1.07	1	1		Reticulon-3 OS=Homo sapiens OX=9606 GN=RTN3 PE=1 SV=2	29.1057	33.5833	25.9554	30.8585	36.4298	23.1849	24.1174	18.2746	1.17152
873	TRUE	P41440|S19A1_HUMAN	1.95	1.86	1	1		Reduced folate transporter OS=Homo sapiens OX=9606 GN=SLC19A1 PE=1 SV=3	26.5873	33.9391	21.2724	28.3633	43.6624	50.3709	7.08403	9.50094	0.995875
1138	TRUE	P02679|FIBG_HUMAN	6.11	5.52	2	2		Fibrinogen gamma chain OS=Homo sapiens OX=9606 GN=FGG PE=1 SV=3	30.0889	27.194	31.4518	29.6332	19.8244	20.3913	27.1543	34.2835	1.16442
289	TRUE	P50570|DYN2_HUMAN	9.29	2.18	1	1		Dynamin-2 OS=Homo sapiens OX=9606 GN=DNM2 PE=1 SV=2	29.3212	31.9539	52.0949	54.6654	8.61458	12.0487	13.2382	17.1812	3.28947
24	TRUE	Q9UPN3|MACF1_HUMAN	2.06	0.22	1	1		Microtubule-actin cross-linking factor 1, isoforms 1/2/3/5 OS=Homo sapiens OX=9606 GN=MACF1 PE=1 SV=4	61.8361	57.4377	12.7144	0	27.3396	36.997	18.7974	0	1.58765
182	TRUE	Q04912|RON_HUMAN	7.59	1.71	2	2		Macrophage-stimulating protein receptor OS=Homo sapiens OX=9606 GN=MST1R PE=1 SV=3	15.3923	40.6556	69.6167	38.4713	11.1837	24.3662	6.30592	7.46342	3.32803
812	TRUE	Q99829|CPNE1_HUMAN	6.27	1.68	1	1		Copine-1 OS=Homo sapiens OX=9606 GN=CPNE1 PE=1 SV=1	29.2198	35.2658	20.3778	34.9053	34.5364	25.0176	21.2165	12.6135	1.28254
1074	TRUE	Q08334|I10R2_HUMAN	11.42	3.69	1	1		Interleukin-10 receptor subunit beta OS=Homo sapiens OX=9606 GN=IL10RB PE=1 SV=2	19.5513	18.9436	29.29	25.9649	29.0595	52.3291	16.1662	16.4967	0.821995
791	TRUE	Q7KYR7|BT2A1_HUMAN	11.32	2.09	1	1		Butyrophilin subfamily 2 member A1 OS=Homo sapiens OX=9606 GN=BTN2A1 PE=1 SV=3	28.8772	32.0944	13.902	28.9084	48.0412	20.3045	16.0071	18.9493	1.00465
1551	TRUE	Q96A54|PAQR1_HUMAN	5.57	3.2	1	1		Adiponectin receptor protein 1 OS=Homo sapiens OX=9606 GN=ADIPOR1 PE=1 SV=1	22.2051	17.3937	65.8236	48.3669	17.0738	18.7948	6.39532	9.35218	2.97949
1233	TRUE	Q92747|ARC1A_HUMAN	17.31	4.59	1	1		Actin-related protein 2/3 complex subunit 1A OS=Homo sapiens OX=9606 GN=ARPC1A PE=1 SV=2	24.2149	27.5698	17.7791	17.44	22.2459	24.4791	27.3849	43.2645	0.74125
824	TRUE	Q92542|NICA_HUMAN	19.48	1.55	1	1		Nicastrin OS=Homo sapiens OX=9606 GN=NCSTN PE=1 SV=2	19.9799	23.4748	25.1453	15.5966	45.0539	40.9767	16.7822	15.3953	0.712274
1466	TRUE	Q9HBW0|LPAR2_HUMAN	1.8	2.56	1	1		Lysophosphatidic acid receptor 2 OS=Homo sapiens OX=9606 GN=LPAR2 PE=1 SV=2	25.8108	32.2067	28.1708	36.9181	29.6173	22.8389	10.5853	10.0881	1.6834
892	TRUE	Q92896|GSLG1_HUMAN	0.92	0.85	1	1	Oxidation (M)	Golgi apparatus protein 1 OS=Homo sapiens OX=9606 GN=GLG1 PE=1 SV=2	15.6769	38.3974	32.0294	41.8501	10.7452	16.4663	22.8217	16.5563	1.92153
850	TRUE	P18827|SDC1_HUMAN	13.03	3.87	1	1		Syndecan-1 OS=Homo sapiens OX=9606 GN=SDC1 PE=1 SV=3	0	0	15.5423	15.8973	63.2258	64.1762	19.4809	15.3777	0.19376
586	TRUE	Q9UJU6|DBNL_HUMAN	2.41	2.56	1	1		Drebrin-like protein OS=Homo sapiens OX=9606 GN=DBNL PE=1 SV=1	71.6039	58.5153	15.5689	11.2461	0	9.40237	12.9508	13.5574	4.37014
1332	TRUE	P61077|UB2D3_HUMAN	13.08	7.48	1	1		Ubiquitin-conjugating enzyme E2 D3 OS=Homo sapiens OX=9606 GN=UBE2D3 PE=1 SV=1	31.2837	26.0578	15.2265	0	36.199	16.5165	33.1918	30.8798	0.62137
113	TRUE	Q9P273|TEN3_HUMAN	15.6	0.44	1	1		Teneurin-3 OS=Homo sapiens OX=9606 GN=TENM3 PE=1 SV=3	34.2285	40.586	29.7145	32.7937	11.5931	22.4387	6.39903	8.87366	2.7852
155	TRUE	Q07065|CKAP4_HUMAN	55.13	17.61	8	8		Cytoskeleton-associated protein 4 OS=Homo sapiens OX=9606 GN=CKAP4 PE=1 SV=2	0	0	0	0	0	0	61.7654	117.89	0
1352	TRUE	P42336|PK3CA_HUMAN	141.35	0.75	1	1	Acetylation (N-term)	Phosphatidylinositol 4,5-bisphosphate 3-kinase catalytic subunit alpha isoform OS=Homo sapiens OX=9606 GN=PIK3CA PE=1 SV=2	0	0	0	0	0	0	86.4171	91.1387	0
254	TRUE	Q08174|PCDH1_HUMAN	23.09	1.23	1	1	Oxidation (M)	Protocadherin-1 OS=Homo sapiens OX=9606 GN=PCDH1 PE=1 SV=2	20.4921	0	18.9725	16.6388	39.26	41.8225	14.696	23.938	0.468636
1435	TRUE	Q8NHG7|SVIP_HUMAN	15.08	14.29	1	1		Small VCP/p97-interacting protein OS=Homo sapiens OX=9606 GN=SVIP PE=1 SV=1	0	18.1475	26.9861	24.3958	29.125	28.857	22.066	25.7899	0.656942
1137	TRUE	O95171|SCEL_HUMAN	0.87	1.74	1	1		Sciellin OS=Homo sapiens OX=9606 GN=SCEL PE=1 SV=2	26.5752	85.807	0	0	0	8.52802	30.7746	22.3327	1.82334
88	TRUE	Q14160|SCRIB_HUMAN	14.56	0.61	1	1		Protein scribble homolog OS=Homo sapiens OX=9606 GN=SCRIB PE=1 SV=4	22.2405	17.6757	15.0877	25.0658	36.398	31.1766	13.0959	12.4587	0.859771
723	TRUE	Q08357|S20A2_HUMAN	0.84	1.53	1	1		Sodium-dependent phosphate transporter 2 OS=Homo sapiens OX=9606 GN=SLC20A2 PE=1 SV=1	19.5173	23.1569	29.6768	36.7249	15.8257	22.5965	14.0229	9.41013	1.7634
957	TRUE	Q9H444|CHM4B_HUMAN	32.38	6.25	1	1		Charged multivesicular body protein 4b OS=Homo sapiens OX=9606 GN=CHMP4B PE=1 SV=1	21.9197	17.7569	13.7731	16.681	31.0403	34.2916	17.022	14.9108	0.72103
1313	TRUE	Q14210|LY6D_HUMAN	24.98	10.94	1	1		Lymphocyte antigen 6D OS=Homo sapiens OX=9606 GN=LY6D PE=1 SV=1	0	0	16.3587	16.5251	38.7767	35.8558	35.9402	23.2808	0.24567
562	TRUE	Q96RF0|SNX18_HUMAN	5.01	2.71	1	1		Sorting nexin-18 OS=Homo sapiens OX=9606 GN=SNX18 PE=1 SV=2	20.5738	17.4625	24.5552	18.3965	36.6009	30.3573	12.4062	6.30674	0.945335
796	TRUE	P26012|ITB8_HUMAN	6.82	4.03	2	2		Integrin beta-8 OS=Homo sapiens OX=9606 GN=ITGB8 PE=1 SV=1	0	0	32.1925	47.4247	34.406	22.4831	14.009	9.79273	0.986695
466	TRUE	P46459|NSF_HUMAN	7.05	1.48	1	1		Vesicle-fusing ATPase OS=Homo sapiens OX=9606 GN=NSF PE=1 SV=3	0	14.088	18.1126	16.1784	14.107	11.7451	43.4014	42.4761	0.433001
1574	TRUE	P68402|PA1B2_HUMAN	4.62	8.3	1	1		Platelet-activating factor acetylhydrolase IB subunit alpha2 OS=Homo sapiens OX=9606 GN=PAFAH1B2 PE=1 SV=1	14.4609	19.533	24.4218	29.4495	21.1609	27.917	11.0237	11.7479	1.22291
714	TRUE	P50443|S26A2_HUMAN	4.04	2.71	1	1		Sulfate transporter OS=Homo sapiens OX=9606 GN=SLC26A2 PE=1 SV=2	22.685	20.7186	23.1306	22.7178	19.0834	23.4899	11.2999	10.5004	1.38647
124	TRUE	Q99959|PKP2_HUMAN	6.29	1.25	1	1		Plakophilin-2 OS=Homo sapiens OX=9606 GN=PKP2 PE=1 SV=2	17.5914	15.0499	24.6926	21.172	15.3049	26.1125	12.8842	11.9144	1.1856
413	TRUE	O75122|CLAP2_HUMAN	17.54	0.7	1	1		CLIP-associating protein 2 OS=Homo sapiens OX=9606 GN=CLASP2 PE=1 SV=3	25.1162	19.7575	16.9551	12.881	16.817	18.1714	17.4787	16.2029	1.08796
649	TRUE	Q9H2K8|TAOK3_HUMAN	12.1	1.45	1	1		Serine/threonine-protein kinase TAO3 OS=Homo sapiens OX=9606 GN=TAOK3 PE=1 SV=2	17.2222	0	20.0837	18.2129	16.866	30.1643	18.138	16.3377	0.681164
762	TRUE	P67870|CSK2B_HUMAN	7.06	6.51	1	1		Casein kinase II subunit beta OS=Homo sapiens OX=9606 GN=CSNK2B PE=1 SV=1	19.1344	0	18.6634	20.1938	15.6848	15.518	23.9466	18.3002	0.789544
1444	TRUE	P43003|EAA1_HUMAN	1.99	2.21	1	1		Excitatory amino acid transporter 1 OS=Homo sapiens OX=9606 GN=SLC1A3 PE=1 SV=1	12.9371	20.1439	41.2794	28.9446	14.2302	12.3193	0	0	3.89103
156	TRUE	Q12965|MYO1E_HUMAN	7.34	1.53	1	1		Unconventional myosin-Ie OS=Homo sapiens OX=9606 GN=MYO1E PE=1 SV=2	13.0185	16.8716	16.3259	24.8246	16.3308	17.7793	11.2931	11.8829	1.2401
997	TRUE	Q99653|CHP1_HUMAN	1.33	5.64	1	1		Calcineurin B homologous protein 1 OS=Homo sapiens OX=9606 GN=CHP1 PE=1 SV=3	15.437	16.1288	17.4125	29.0635	12.3687	13.6128	8.85362	14.9695	1.56696
703	TRUE	P05362|ICAM1_HUMAN	6.85	2.63	1	1		Intercellular adhesion molecule 1 OS=Homo sapiens OX=9606 GN=ICAM1 PE=1 SV=2	0	0	43.3809	50.7063	0	23.3483	0	5.75886	3.23244
814	TRUE	P58335|ANTR2_HUMAN	13.87	2.86	1	1		Anthrax toxin receptor 2 OS=Homo sapiens OX=9606 GN=ANTXR2 PE=1 SV=5	64.1775	49.9288	0	0	8.78876	0	0	0	12.9832
480	TRUE	Q9H6S3|ES8L2_HUMAN	22.6	1.82	1	1		Epidermal growth factor receptor kinase substrate 8-like protein 2 OS=Homo sapiens OX=9606 GN=EPS8L2 PE=1 SV=2	0	0	16.7794	14.7525	25.249	25.9182	15.9189	22.9617	0.350169
1081	TRUE	Q5T3F8|CSCL2_HUMAN	3.19	1.08	1	1		CSC1-like protein 2 OS=Homo sapiens OX=9606 GN=TMEM63B PE=1 SV=1	18.6764	0	28.2533	30.3295	10.5353	0	11.1956	13.1055	2.21777
482	TRUE	P51572|BAP31_HUMAN	65.72	4.47	1	1		B-cell receptor-associated protein 31 OS=Homo sapiens OX=9606 GN=BCAP31 PE=1 SV=3	0	0	0	0	0	0	60.9386	47.8956	0
1310	TRUE	A0A0C4DH30|HV316_HUMAN	11.2	16.24	1	1		Probable non-functional immunoglobulin heavy variable 3-16 OS=Homo sapiens OX=9606 GN=IGHV3-16 PE=1 SV=1	0	14.5046	12.1081	12.1484	13.7719	13.8997	12.7692	28.6035	0.561395
1310	TRUE	A0A0C4DH35|HV335_HUMAN	11.2	16.24	1	1		Probable non-functional immunoglobulin heavy variable 3-35 OS=Homo sapiens OX=9606 GN=IGHV3-35 PE=1 SV=1	0	14.5046	12.1081	12.1484	13.7719	13.8997	12.7692	28.6035	0.561395
1310	TRUE	A0A0J9YX35|HV64D_HUMAN	11.2	16.24	1	1		Immunoglobulin heavy variable 3-64D OS=Homo sapiens OX=9606 GN=IGHV3-64D PE=3 SV=1	0	14.5046	12.1081	12.1484	13.7719	13.8997	12.7692	28.6035	0.561395
1310	TRUE	P01763|HV348_HUMAN	11.2	16.24	1	1		Immunoglobulin heavy variable 3-48 OS=Homo sapiens OX=9606 GN=IGHV3-48 PE=1 SV=2	0	14.5046	12.1081	12.1484	13.7719	13.8997	12.7692	28.6035	0.561395
1310	TRUE	A0A0B4J1X5|HV374_HUMAN	11.2	16.24	1	1		Immunoglobulin heavy variable 3-74 OS=Homo sapiens OX=9606 GN=IGHV3-74 PE=3 SV=1	0	14.5046	12.1081	12.1484	13.7719	13.8997	12.7692	28.6035	0.561395
1310	TRUE	P01780|HV307_HUMAN	11.2	16.24	1	1		Immunoglobulin heavy variable 3-7 OS=Homo sapiens OX=9606 GN=IGHV3-7 PE=1 SV=2	0	14.5046	12.1081	12.1484	13.7719	13.8997	12.7692	28.6035	0.561395
1310	TRUE	A0A0B4J1Y9|HV372_HUMAN	11.2	15.97	1	1		Immunoglobulin heavy variable 3-72 OS=Homo sapiens OX=9606 GN=IGHV3-72 PE=3 SV=1	0	14.5046	12.1081	12.1484	13.7719	13.8997	12.7692	28.6035	0.561395
1310	TRUE	P01766|HV313_HUMAN	11.2	16.38	1	1		Immunoglobulin heavy variable 3-13 OS=Homo sapiens OX=9606 GN=IGHV3-13 PE=1 SV=2	0	14.5046	12.1081	12.1484	13.7719	13.8997	12.7692	28.6035	0.561395
1310	TRUE	P01764|HV323_HUMAN	11.2	16.24	1	1		Immunoglobulin heavy variable 3-23 OS=Homo sapiens OX=9606 GN=IGHV3-23 PE=1 SV=2	0	14.5046	12.1081	12.1484	13.7719	13.8997	12.7692	28.6035	0.561395
1108	TRUE	P49773|HINT1_HUMAN	3.57	19.05	1	1	Oxidation (M)	Histidine triad nucleotide-binding protein 1 OS=Homo sapiens OX=9606 GN=HINT1 PE=1 SV=2	0	0	40.8474	23.6516	0	11.6486	9.87061	21.618	1.49521
1059	TRUE	Q8WUM9|S20A1_HUMAN	1.1	1.47	1	1		Sodium-dependent phosphate transporter 1 OS=Homo sapiens OX=9606 GN=SLC20A1 PE=1 SV=1	34.8577	8.62489	28.1314	0	13.3778	22.5917	0	0	1.99096
108	TRUE	P55196|AFAD_HUMAN	21.24	0.71	1	1		Afadin OS=Homo sapiens OX=9606 GN=AFDN PE=1 SV=3	0	0	10.7751	0	30.2836	21.184	17.0581	15.5901	0.128098
634	TRUE	P07947|YES_HUMAN	1.27	2.03	3	1		Tyrosine-protein kinase Yes OS=Homo sapiens OX=9606 GN=YES1 PE=1 SV=3	0	0	17.9115	19.8731	8.99558	27.9082	5.69631	11.0914	0.703736
246	TRUE	Q6NSJ5|LRC8E_HUMAN	6.79	1.63	1	1		Volume-regulated anion channel subunit LRRC8E OS=Homo sapiens OX=9606 GN=LRRC8E PE=1 SV=2	0	0	21.5805	22.7083	18.833	16.0854	8.87541	0	1.0113
521	TRUE	Q9NYQ6|CELR1_HUMAN	8.1	0.5	1	1		Cadherin EGF LAG seven-pass G-type receptor 1 OS=Homo sapiens OX=9606 GN=CELSR1 PE=1 SV=1	0	0	22.3018	27.9917	16.3169	14.4172	0	5.46809	1.38924
90	TRUE	Q15075|EEA1_HUMAN	14.46	1.49	2	2		Early endosome antigen 1 OS=Homo sapiens OX=9606 GN=EEA1 PE=1 SV=2	0	0	0	11.3903	0	0	31.3992	40.9251	0.157488
531	TRUE	P55010|IF5_HUMAN	0.82	2.78	1	1		Eukaryotic translation initiation factor 5 OS=Homo sapiens OX=9606 GN=EIF5 PE=1 SV=2	0	0	20.2432	17.9199	0	7.65588	18.7094	17.7932	0.864231
810	TRUE	Q9Y639|NPTN_HUMAN	0.79	2.51	1	1		Neuroplastin OS=Homo sapiens OX=9606 GN=NPTN PE=1 SV=2	18.9894	0	0	0	62.9458	0	0	0	0.301679
564	TRUE	Q9H6X2|ANTR1_HUMAN	3.24	1.77	1	1		Anthrax toxin receptor 1 OS=Homo sapiens OX=9606 GN=ANTXR1 PE=1 SV=2	14.1008	12.5036	18.4711	17.8058	9.1204	8.98561	0	0	3.47295
1245	TRUE	Q92743|HTRA1_HUMAN	8.62	2.08	1	1		Serine protease HTRA1 OS=Homo sapiens OX=9606 GN=HTRA1 PE=1 SV=1	0	0	12.9912	12.1672	15.4161	15.1402	15.0651	8.15658	0.467819
652	TRUE	Q9UNN8|EPCR_HUMAN	0.56	3.78	1	1		Endothelial protein C receptor OS=Homo sapiens OX=9606 GN=PROCR PE=1 SV=1	0	0	10.0833	23.2096	24.0086	14.6757	0	5.5106	0.753318
11	TRUE	Q01082|SPTB2_HUMAN	8.15	0.51	1	1	Oxidation (M)	Spectrin beta chain, non-erythrocytic 1 OS=Homo sapiens OX=9606 GN=SPTBN1 PE=1 SV=2	0	0	26.0038	19.2343	0	10.8572	8.53211	11.1908	1.47933
467	TRUE	P55011|S12A2_HUMAN	15.87	0.99	1	1		Solute carrier family 12 member 2 OS=Homo sapiens OX=9606 GN=SLC12A2 PE=1 SV=1	0	0	9.364	0	30.397	28.6438	5.30297	0	0.145531
1383	TRUE	P51178|PLCD1_HUMAN	64.05	1.32	1	1		1-phosphatidylinositol 4,5-bisphosphate phosphodiesterase delta-1 OS=Homo sapiens OX=9606 GN=PLCD1 PE=1 SV=2	0	0	0	0	0	21.4382	27.9922	24.1526	0
929	TRUE	Q9UHG3|PCYOX_HUMAN	90.14	1.78	1	1		Prenylcysteine oxidase 1 OS=Homo sapiens OX=9606 GN=PCYOX1 PE=1 SV=3	0	0	0	0	23.0842	18.1798	16.8303	12.5311	0
1362	TRUE	P12259|FA5_HUMAN	7.39	0.58	1	1		Coagulation factor V OS=Homo sapiens OX=9606 GN=F5 PE=1 SV=4	0	0	14.0706	15.9677	12.0933	11.4658	5.19428	5.47684	0.877538
1024	TRUE	Q8IW75|SPA12_HUMAN	63.62	9.66	3	3		Serpin A12 OS=Homo sapiens OX=9606 GN=SERPINA12 PE=1 SV=1	0	0	0	0	0	0	34.9202	27.2198	0
1406	TRUE	Q9BRF8|CPPED_HUMAN	50.09	3.5	1	1	Acetylation (N-term)	Serine/threonine-protein phosphatase CPPED1 OS=Homo sapiens OX=9606 GN=CPPED1 PE=1 SV=3	0	0	0	0	9.54337	10.7765	26.0824	8.43341	0
321	TRUE	Q13618|CUL3_HUMAN	3.7	1.3	1	1		Cullin-3 OS=Homo sapiens OX=9606 GN=CUL3 PE=1 SV=2	0	0	10.7794	12.691	9.37137	0	12.5396	9.27053	0.752704
602	TRUE	O15118|NPC1_HUMAN	12.42	0.94	1	1		NPC intracellular cholesterol transporter 1 OS=Homo sapiens OX=9606 GN=NPC1 PE=1 SV=2	0	0	9.0085	0	18.8177	21.9076	0	0	0.221201
629	TRUE	O60353|FZD6_HUMAN	61.09	1.98	1	1		Frizzled-6 OS=Homo sapiens OX=9606 GN=FZD6 PE=1 SV=2	0	0	0	0	22.5861	26.7634	0	0	0
181	TRUE	Q08345|DDR1_HUMAN	9.65	0.99	1	1		Epithelial discoidin domain-containing receptor 1 OS=Homo sapiens OX=9606 GN=DDR1 PE=1 SV=1	0	0	0	16.2358	15.366	15.0009	0	0	0.534655
874	TRUE	P48067|SC6A9_HUMAN	9.64	1.42	1	1		Sodium- and chloride-dependent glycine transporter 1 OS=Homo sapiens OX=9606 GN=SLC6A9 PE=1 SV=3	18.1218	0	0	0	20.0492	7.97251	0	0	0.646706
927	TRUE	Q92930|RAB8B_HUMAN	10.1	5.8	1	1		Ras-related protein Rab-8B OS=Homo sapiens OX=9606 GN=RAB8B PE=1 SV=2	0	0	0	15.3556	17.0151	0	0	12.0244	0.528783
1071	TRUE	P14384|CBPM_HUMAN	10.97	2.26	1	1		Carboxypeptidase M OS=Homo sapiens OX=9606 GN=CPM PE=1 SV=2	0	0	0	9.60503	18.4621	9.8877	0	0	0.338804
105	TRUE	Q00341|VIGLN_HUMAN	10.71	0.87	1	1		Vigilin OS=Homo sapiens OX=9606 GN=HDLBP PE=1 SV=2	0	0	0	11.8362	0	0	10.0358	10.4394	0.578073
173	TRUE	O75146|HIP1R_HUMAN	54.07	1.5	1	1		Huntingtin-interacting protein 1-related protein OS=Homo sapiens OX=9606 GN=HIP1R PE=1 SV=2	0	0	0	0	0	0	9.40504	15.5345	0
146	TRUE	Q96RT1|ERBIN_HUMAN	52.54	0.85	1	1		Erbin OS=Homo sapiens OX=9606 GN=ERBIN PE=1 SV=2	0	0	0	0	13.5352	7.64333	0	0	0
1184	TRUE	P18510|IL1RA_HUMAN	63.85	10.73	1	1		Interleukin-1 receptor antagonist protein OS=Homo sapiens OX=9606 GN=IL1RN PE=1 SV=1	0	0	0	0	0	0	10.8147	8.99035	0

## Sheet: Imputed Matrix
Protein Group	Top	Accession	Significance	Coverage (%)	#Peptides	#Unique	PTM	Description	Myc_EV_2-2 Area	Myc_EV_2-1 Area	Myc_EV_1-2 Area	Myc_EV_1-1 Area	Control_EV_2-2 Area	Control_EV_2-1 Area	Control_EV_1-2 Area	Control_EV_1-1 Area	Myc/Control
863	TRUE	Q15517|CDSN_HUMAN	16.62	7.94	2	2	Oxidation (M)	Corneodesmosin OS=Homo sapiens OX=9606 GN=CDSN PE=1 SV=3	6.94632	6.91418	3.69313	8.09594	8.41709	8.49173	11.7454	11.8028	-3.70184
208	TRUE	P14735|IDE_HUMAN	21.33	20.31	18	18	Oxidation (M)	Insulin-degrading enzyme OS=Homo sapiens OX=9606 GN=IDE PE=1 SV=4	4.64631	4.61751	4.46953	4.93072	10.3386	5.28842	8.45519	8.56232	-3.49513
136	TRUE	Q86YZ3|HORN_HUMAN	11.05	6.42	12	12	Oxidation (M)	Hornerin OS=Homo sapiens OX=9606 GN=HRNR PE=1 SV=2	5.62254	4.72332	5.52227	5.49437	5.59431	5.7484	11.7207	11.737	-3.3595
1030	TRUE	Q01628|IFM3_HUMAN	29.18	30.83	2	2	Oxidation (M)	Interferon-induced transmembrane protein 3 OS=Homo sapiens OX=9606 GN=IFITM3 PE=1 SV=2	6.54597	5.91641	7.53156	7.5777	10.7674	11.6487	9.70459	8.87475	-3.35593
106	TRUE	Q92817|EVPL_HUMAN	37.76	6.49	10	10		Envoplakin OS=Homo sapiens OX=9606 GN=EVPL PE=1 SV=3	3.39349	2.15112	3.40257	2.60309	4.32454	4.59769	7.43334	7.82503	-3.15758
591	TRUE	Q01469|FABP5_HUMAN	15.66	30.37	4	4	Acetylation (N-term);Carbamidomethylation	Fatty acid-binding protein 5 OS=Homo sapiens OX=9606 GN=FABP5 PE=1 SV=3	6.11466	5.95752	5.98736	6.02519	7.12095	7.17503	11.1063	11.2426	-3.14003
128	TRUE	P04792|HSPB1_HUMAN	19.78	65.85	14	14	Oxidation (M)	Heat shock protein beta-1 OS=Homo sapiens OX=9606 GN=HSPB1 PE=1 SV=2	7.90253	7.77717	7.93853	8.17921	9.48474	9.58522	12.4516	12.4752	-3.04982
37	TRUE	P08727|K1C19_HUMAN	9.49	25	18	15	Oxidation (M)	Keratin, type I cytoskeletal 19 OS=Homo sapiens OX=9606 GN=KRT19 PE=1 SV=4	9.55228	9.47205	9.6043	9.90656	9.11492	9.78563	15.3588	15.3234	-2.7619
159	TRUE	P20930|FILA_HUMAN	12.97	2.91	11	11	Oxidation (M)	Filaggrin OS=Homo sapiens OX=9606 GN=FLG PE=1 SV=3	7.42542	7.52284	7.34313	7.35219	7.95379	7.96728	12.137	12.3627	-2.69429
3	TRUE	P15924|DESP_HUMAN	10.15	43.33	135	135	Carbamidomethylation;Oxidation (M)	Desmoplakin OS=Homo sapiens OX=9606 GN=DSP PE=1 SV=3	9.3063	8.80606	8.84685	8.90919	8.70755	9.14531	14.1657	14.2526	-2.60068
516	TRUE	P01040|CYTA_HUMAN	12.93	75.51	7	7		Cystatin-A OS=Homo sapiens OX=9606 GN=CSTA PE=1 SV=1	9.56715	9.53327	8.4402	8.85131	9.56765	9.67222	13.7379	13.7763	-2.59054
939	TRUE	Q10589|BST2_HUMAN	24.2	13.89	2	2		Bone marrow stromal antigen 2 OS=Homo sapiens OX=9606 GN=BST2 PE=1 SV=1	6.39443	4.87041	5.84232	5.89761	9.64713	9.73538	6.72198	7.17275	-2.56812
169	TRUE	Q08431|MFGM_HUMAN	31.86	54.01	21	21	Oxidation (M)	Lactadherin OS=Homo sapiens OX=9606 GN=MFGE8 PE=1 SV=3	10.9432	10.9685	11.9353	12.0063	14.8364	14.6664	13.1159	13.3149	-2.52006
265	TRUE	P07476|INVO_HUMAN	17.75	24.1	11	11		Involucrin OS=Homo sapiens OX=9606 GN=IVL PE=1 SV=2	4.78978	4.34095	5.87921	5.23179	6.18115	6.47062	8.8187	8.64129	-2.46751
185	TRUE	P22735|TGM1_HUMAN	59.56	12.85	8	8		Protein-glutamine gamma-glutamyltransferase K OS=Homo sapiens OX=9606 GN=TGM1 PE=1 SV=4	7.03841	6.9883	7.00415	7.06359	9.69619	9.58013	9.30687	9.34045	-2.4573
38	TRUE	P14923|PLAK_HUMAN	23.21	30.2	22	17	Oxidation (M)	Junction plakoglobin OS=Homo sapiens OX=9606 GN=JUP PE=1 SV=3	9.74751	10.1506	10.0933	10.1303	11.5622	11.519	13.3935	13.3523	-2.42631
374	TRUE	P05109|S10A8_HUMAN	6.67	51.61	10	10	Carbamidomethylation;Oxidation (M)	Protein S100-A8 OS=Homo sapiens OX=9606 GN=S100A8 PE=1 SV=1	8.83732	8.73107	8.11045	9.11003	7.62834	7.29608	14.7774	14.7222	-2.40878
245	TRUE	P04083|ANXA1_HUMAN	18.42	54.05	15	15	Oxidation (M)	Annexin A1 OS=Homo sapiens OX=9606 GN=ANXA1 PE=1 SV=2	8.32479	8.87084	9.71997	9.91915	10.4774	10.5862	12.5292	12.5366	-2.32367
149	TRUE	Q08554|DSC1_HUMAN	11.7	29.64	25	25	Carbamidomethylation;Oxidation (M)	Desmocollin-1 OS=Homo sapiens OX=9606 GN=DSC1 PE=1 SV=2	9.81077	9.8539	9.07006	8.04805	9.59497	9.37158	13.5442	13.5408	-2.31719
137	TRUE	Q02413|DSG1_HUMAN	9.73	23.45	23	23	Oxidation (M)	Desmoglein-1 OS=Homo sapiens OX=9606 GN=DSG1 PE=1 SV=2	8.03263	10.0019	7.65853	9.91328	8.98948	8.85182	13.264	13.3788	-2.21943
410	TRUE	P01889|HLAB_HUMAN	22.7	9.39	7	2		HLA class I histocompatibility antigen, B alpha chain OS=Homo sapiens OX=9606 GN=HLA-B PE=1 SV=3	7.00596	8.67739	8.24881	8.41415	11.4392	11.414	8.99936	9.08293	-2.1473
61	TRUE	P0DMV8|HS71A_HUMAN	16.64	15.91	21	10	Oxidation (M)	Heat shock 70 kDa protein 1A OS=Homo sapiens OX=9606 GN=HSPA1A PE=1 SV=1	7.56276	7.4054	8.16058	7.62211	8.49911	8.65205	11.0929	11.0774	-2.14265
61	TRUE	P0DMV9|HS71B_HUMAN	16.64	15.91	21	10	Oxidation (M)	Heat shock 70 kDa protein 1B OS=Homo sapiens OX=9606 GN=HSPA1B PE=1 SV=1	7.56276	7.4054	8.16058	7.62211	8.49911	8.65205	11.0929	11.0774	-2.14265
220	TRUE	Q08188|TGM3_HUMAN	11.42	28.14	16	16	Oxidation (M)	Protein-glutamine gamma-glutamyltransferase E OS=Homo sapiens OX=9606 GN=TGM3 PE=1 SV=4	6.89092	6.65894	7.20867	6.91629	7.35851	6.82439	11.0598	10.985	-2.1382
445	TRUE	Q5D862|FILA2_HUMAN	35.11	2.09	4	4		Filaggrin-2 OS=Homo sapiens OX=9606 GN=FLG2 PE=1 SV=1	7.63161	8.02534	6.6852	6.87031	9.00265	9.35789	9.25568	9.90392	-2.07692
695	TRUE	P60953|CDC42_HUMAN	24.25	31.41	6	6	Carbamidomethylation	Cell division control protein 42 homolog OS=Homo sapiens OX=9606 GN=CDC42 PE=1 SV=2	7.54052	7.94811	9.34833	9.28625	11.0208	11.1537	10.061	10.0802	-2.04814
8	TRUE	P13647|K2C5_HUMAN	12.74	50.51	64	47	Acetylation (N-term);Carbamidomethylation;Oxidation (M)	Keratin, type II cytoskeletal 5 OS=Homo sapiens OX=9606 GN=KRT5 PE=1 SV=3	11.9012	11.8705	12.1422	11.9856	12.3359	12.3012	15.6715	15.6898	-2.02472
840	TRUE	P11279|LAMP1_HUMAN	24.5	6	2	2		Lysosome-associated membrane glycoprotein 1 OS=Homo sapiens OX=9606 GN=LAMP1 PE=1 SV=3	4.84219	7.05837	7.02189	5.74658	8.31808	8.5041	7.93892	7.98086	-2.01823
587	TRUE	Q14108|SCRB2_HUMAN	53.66	23.43	7	7	Oxidation (M)	Lysosome membrane protein 2 OS=Homo sapiens OX=9606 GN=SCARB2 PE=1 SV=2	7.52921	8.04817	7.30576	7.56622	9.97649	10.1509	9.05277	9.25014	-1.99523
65	TRUE	Q9UMD9|COHA1_HUMAN	12.27	2.47	4	4	Oxidation (M)	Collagen alpha-1(XVII) chain OS=Homo sapiens OX=9606 GN=COL17A1 PE=1 SV=3	6.15963	5.37283	6.92359	6.62796	8.22171	8.05635	10.5847	5.68024	-1.86475
450	TRUE	P25311|ZA2G_HUMAN	10.67	28.86	6	6	Oxidation (M)	Zinc-alpha-2-glycoprotein OS=Homo sapiens OX=9606 GN=AZGP1 PE=1 SV=2	8.03276	8.05742	7.7932	7.87818	7.95456	7.81689	11.5741	11.5836	-1.79191
1352	TRUE	P42336|PK3CA_HUMAN	141.35	0.75	1	1	Acetylation (N-term)	Phosphatidylinositol 4,5-bisphosphate 3-kinase catalytic subunit alpha isoform OS=Homo sapiens OX=9606 GN=PIK3CA PE=1 SV=2	3.9716	3.08442	2.5414	2.32764	2.83605	3.16612	6.43325	6.50999	-1.75509
1340	TRUE	Q96L46|CPNS2_HUMAN	20.23	5.24	1	1	Oxidation (M)	Calpain small subunit 2 OS=Homo sapiens OX=9606 GN=CAPNS2 PE=1 SV=2	3.65973	2.33761	3.2317	3.37845	7.87867	3.0641	4.348	4.26438	-1.73691
1480	TRUE	P0DP57|SLUR2_HUMAN	8.14	13.4	1	1		Secreted Ly-6/uPAR domain-containing protein 2 OS=Homo sapiens OX=9606 GN=SLURP2 PE=1 SV=1	5.09277	5.56914	5.10507	4.73903	4.51449	4.54752	9.05895	9.24787	-1.7157
764	TRUE	Q15691|MARE1_HUMAN	10.95	2.99	1	1		Microtubule-associated protein RP/EB family member 1 OS=Homo sapiens OX=9606 GN=MAPRE1 PE=1 SV=3	4.05008	1.88775	4.80287	4.54329	5.32738	4.27351	6.38396	6.10334	-1.70105
118	TRUE	P54652|HSP72_HUMAN	12.76	16.43	18	8	Oxidation (M)	Heat shock-related 70 kDa protein 2 OS=Homo sapiens OX=9606 GN=HSPA2 PE=1 SV=1	6.52521	6.42541	6.60463	6.04226	6.64687	6.64676	9.44458	9.63208	-1.6932
1312	TRUE	P0CG04|IGLC1_HUMAN	20.44	14.15	1	1		Immunoglobulin lambda constant 1 OS=Homo sapiens OX=9606 GN=IGLC1 PE=1 SV=1	6.63085	5.79967	5.00613	6.95054	7.09736	7.40629	8.18975	8.29115	-1.64934
1312	TRUE	P0DOY3|IGLC3_HUMAN	20.44	14.15	1	1		Immunoglobulin lambda constant 3 OS=Homo sapiens OX=9606 GN=IGLC3 PE=1 SV=1	6.63085	5.79967	5.00613	6.95054	7.09736	7.40629	8.18975	8.29115	-1.64934
1312	TRUE	P0DOY2|IGLC2_HUMAN	20.44	14.15	1	1		Immunoglobulin lambda constant 2 OS=Homo sapiens OX=9606 GN=IGLC2 PE=1 SV=1	6.63085	5.79967	5.00613	6.95054	7.09736	7.40629	8.18975	8.29115	-1.64934
1312	TRUE	A0M8Q6|IGLC7_HUMAN	20.44	14.15	1	1		Immunoglobulin lambda constant 7 OS=Homo sapiens OX=9606 GN=IGLC7 PE=1 SV=3	6.63085	5.79967	5.00613	6.95054	7.09736	7.40629	8.18975	8.29115	-1.64934
1312	TRUE	P0CF74|IGLC6_HUMAN	20.44	14.15	1	1		Immunoglobulin lambda constant 6 OS=Homo sapiens OX=9606 GN=IGLC6 PE=1 SV=1	6.63085	5.79967	5.00613	6.95054	7.09736	7.40629	8.18975	8.29115	-1.64934
1312	TRUE	B9A064|IGLL5_HUMAN	20.44	7.01	1	1		Immunoglobulin lambda-like polypeptide 5 OS=Homo sapiens OX=9606 GN=IGLL5 PE=2 SV=2	6.63085	5.79967	5.00613	6.95054	7.09736	7.40629	8.18975	8.29115	-1.64934
1312	TRUE	P0DOX8|IGL1_HUMAN	20.44	6.94	1	1		Immunoglobulin lambda-1 light chain OS=Homo sapiens OX=9606 PE=1 SV=1	6.63085	5.79967	5.00613	6.95054	7.09736	7.40629	8.18975	8.29115	-1.64934
718	TRUE	Q8IZP0|ABI1_HUMAN	8.01	3.15	1	1		Abl interactor 1 OS=Homo sapiens OX=9606 GN=ABI1 PE=1 SV=4	3.82205	2.03503	5.29733	5.74949	5.92274	6.94332	5.58067	5.02218	-1.64125
353	TRUE	P18206|VINC_HUMAN	22.48	13.58	10	10	Oxidation (M)	Vinculin OS=Homo sapiens OX=9606 GN=VCL PE=1 SV=4	5.81716	5.78736	6.63724	6.24602	6.79161	8.15315	7.92436	8.09998	-1.62033
373	TRUE	Q96QA5|GSDMA_HUMAN	13	36.18	11	11	Oxidation (M)	Gasdermin-A OS=Homo sapiens OX=9606 GN=GSDMA PE=1 SV=4	6.09707	6.18204	6.21115	5.76862	6.27088	6.36513	9.02831	9.06803	-1.61837
26	TRUE	O60437|PEPL_HUMAN	12.74	13.67	21	21		Periplakin OS=Homo sapiens OX=9606 GN=PPL PE=1 SV=4	5.48637	5.98534	5.88413	6.06289	6.2849	5.92757	8.88039	8.79594	-1.61752
147	TRUE	Q9Y446|PKP3_HUMAN	15.85	18.32	10	10		Plakophilin-3 OS=Homo sapiens OX=9606 GN=PKP3 PE=1 SV=1	6.25767	6.00481	7.61662	7.09995	7.50698	7.63364	9.17777	9.08559	-1.60623
86	TRUE	P06733|ENOA_HUMAN	15.64	54.84	18	18	Oxidation (M)	Alpha-enolase OS=Homo sapiens OX=9606 GN=ENO1 PE=1 SV=2	10.1348	10.135	10.625	10.4412	10.7886	11.0816	13.2821	12.545	-1.59031
627	TRUE	P27797|CALR_HUMAN	3.52	7.91	3	3		Calreticulin OS=Homo sapiens OX=9606 GN=CALR PE=1 SV=1	2.57029	3.42877	5.1919	4.42206	3.81806	4.60091	6.82869	6.674	-1.57716
6	TRUE	P58107|EPIPL_HUMAN	10.23	12.36	54	44	Oxidation (M)	Epiplakin OS=Homo sapiens OX=9606 GN=EPPK1 PE=1 SV=3	7.53356	7.49388	7.24955	6.9903	6.93145	7.39296	10.5044	10.5767	-1.53455
120	TRUE	P06702|S10A9_HUMAN	3.92	91.23	26	26	Acetylation (N-term);Oxidation (M)	Protein S100-A9 OS=Homo sapiens OX=9606 GN=S100A9 PE=1 SV=1	11.5186	11.6072	10.7894	10.853	7.86228	9.51402	16.6409	16.7003	-1.48736
203	TRUE	Q14574|DSC3_HUMAN	10.41	11.5	8	8	Oxidation (M)	Desmocollin-3 OS=Homo sapiens OX=9606 GN=DSC3 PE=1 SV=3	6.96218	7.5108	7.40993	7.50833	7.28603	7.19633	10.451	10.3379	-1.47002
77	TRUE	O43795|MYO1B_HUMAN	25.64	14.26	13	12	Oxidation (M)	Unconventional myosin-Ib OS=Homo sapiens OX=9606 GN=MYO1B PE=1 SV=3	7.999	7.9515	8.60224	8.42191	10.6336	10.5825	8.78306	8.84684	-1.46784
27	TRUE	O75691|UTP20_HUMAN	7.03	0.39	1	1		Small subunit processome component 20 homolog OS=Homo sapiens OX=9606 GN=UTP20 PE=1 SV=3	5.73106	5.82182	6.57541	6.24512	5.29626	5.22161	9.788	9.88249	-1.45374
565	TRUE	Q9Y4F1|FARP1_HUMAN	30.54	3.83	3	3		FERM, ARHGEF and pleckstrin domain-containing protein 1 OS=Homo sapiens OX=9606 GN=FARP1 PE=1 SV=1	5.66035	5.25826	5.33309	5.11612	7.47757	7.73241	5.7332	6.07983	-1.4138
287	TRUE	Q04917|1433F_HUMAN	25.52	30.89	7	7	Oxidation (M)	14-3-3 protein eta OS=Homo sapiens OX=9606 GN=YWHAH PE=1 SV=4	8.81143	8.73423	9.71206	9.74013	10.6979	10.6194	10.6439	10.6254	-1.39718
850	TRUE	P18827|SDC1_HUMAN	13.03	3.87	1	1		Syndecan-1 OS=Homo sapiens OX=9606 GN=SDC1 PE=1 SV=3	3.39719	3.4719	3.95813	3.99071	5.98244	6.00397	4.28399	3.94277	-1.34881
981	TRUE	P13473|LAMP2_HUMAN	17.79	7.07	3	3		Lysosome-associated membrane glycoprotein 2 OS=Homo sapiens OX=9606 GN=LAMP2 PE=1 SV=2	6.35845	7.12574	5.37214	6.4603	8.94396	8.9041	6.11365	6.69521	-1.33507
1313	TRUE	Q14210|LY6D_HUMAN	24.98	10.94	1	1		Lymphocyte antigen 6D OS=Homo sapiens OX=9606 GN=LY6D PE=1 SV=1	2.97539	3.82739	4.03198	4.04659	5.27712	5.16414	5.16753	4.54107	-1.31713
7	TRUE	P35579|MYH9_HUMAN	9.68	21.58	35	33	Oxidation (M)	Myosin-9 OS=Homo sapiens OX=9606 GN=MYH9 PE=1 SV=4	8.23256	7.92969	7.24981	8.01194	7.49304	7.69771	10.7087	10.7686	-1.31102
499	TRUE	Q8N271|PROM2_HUMAN	21.56	7.19	5	5		Prominin-2 OS=Homo sapiens OX=9606 GN=PROM2 PE=1 SV=1	7.09297	7.89377	7.99131	8.48959	9.99402	10.0473	8.3198	8.33558	-1.30727
44	TRUE	P12814|ACTN1_HUMAN	25.9	21.86	18	14	Oxidation (M)	Alpha-actinin-1 OS=Homo sapiens OX=9606 GN=ACTN1 PE=1 SV=2	8.93744	9.10142	9.81367	9.92763	10.8024	10.7301	10.6884	10.7825	-1.30579
328	TRUE	P17931|LEG3_HUMAN	10.26	19.6	4	4		Galectin-3 OS=Homo sapiens OX=9606 GN=LGALS3 PE=1 SV=5	8.52878	7.89904	8.36095	8.54094	7.81616	8.63217	11.0966	10.9474	-1.29064
794	TRUE	P63000|RAC1_HUMAN	21.5	7.81	3	2	Oxidation (M)	Ras-related C3 botulinum toxin substrate 1 OS=Homo sapiens OX=9606 GN=RAC1 PE=1 SV=1	6.80205	7.01677	7.71571	7.56365	9.46415	9.49507	7.53295	7.71886	-1.27821
100	TRUE	Q13835|PKP1_HUMAN	20.47	10.58	6	6	Oxidation (M)	Plakophilin-1 OS=Homo sapiens OX=9606 GN=PKP1 PE=1 SV=2	6.65762	6.17272	7.13965	6.91037	7.38532	7.81406	8.43172	8.36133	-1.27802
288	TRUE	P15311|EZRI_HUMAN	44.16	21.16	14	10	Oxidation (M)	Ezrin OS=Homo sapiens OX=9606 GN=EZR PE=1 SV=4	8.09248	7.33511	7.17749	6.98831	9.11185	8.63691	8.29341	8.65712	-1.27648
1267	TRUE	Q9H1C7|CYTM1_HUMAN	14.35	11.34	2	2		Cysteine-rich and transmembrane domain-containing protein 1 OS=Homo sapiens OX=9606 GN=CYSTM1 PE=1 SV=1	7.21096	4.39372	4.45066	6.20036	6.9948	8.09838	6.20723	6.05454	-1.27481
472	TRUE	P61224|RAP1B_HUMAN	20.49	14.13	8	2	Carbamidomethylation;Oxidation (M)	Ras-related protein Rap-1b OS=Homo sapiens OX=9606 GN=RAP1B PE=1 SV=1	7.07596	7.49698	7.37365	7.28207	9.69646	9.72427	7.30786	7.49764	-1.24939
947	TRUE	P11234|RALB_HUMAN	19.8	6.8	1	1		Ras-related protein Ral-B OS=Homo sapiens OX=9606 GN=RALB PE=1 SV=1	6.883	7.61907	8.51679	8.50886	9.59556	9.72013	8.5189	8.6586	-1.24137
581	TRUE	Q15286|RAB35_HUMAN	19.67	11.94	3	2	Oxidation (M)	Ras-related protein Rab-35 OS=Homo sapiens OX=9606 GN=RAB35 PE=1 SV=1	7.95165	7.32645	9.00238	9.02568	9.95681	9.89975	9.20902	9.19283	-1.23806
95	TRUE	P04406|G3P_HUMAN	12.08	42.09	13	13	Carbamidomethylation;Oxidation (M)	Glyceraldehyde-3-phosphate dehydrogenase OS=Homo sapiens OX=9606 GN=GAPDH PE=1 SV=3	11.3282	11.2924	11.1262	10.5632	11.0159	11.2381	13.5222	13.4856	-1.23796
390	TRUE	Q14344|GNA13_HUMAN	27.5	19.1	7	6		Guanine nucleotide-binding protein subunit alpha-13 OS=Homo sapiens OX=9606 GN=GNA13 PE=1 SV=2	7.78024	6.97311	6.67199	7.48639	9.14034	9.34214	7.73862	7.62188	-1.23281
23	TRUE	P05787|K2C8_HUMAN	10.2	15.11	18	7	Acetylation (N-term);Oxidation (M)	Keratin, type II cytoskeletal 8 OS=Homo sapiens OX=9606 GN=KRT8 PE=1 SV=7	6.16195	6.21816	6.32775	6.69353	6.03238	6.35941	8.95307	8.97645	-1.22998
697	TRUE	P63167|DYL1_HUMAN	10.67	12.36	1	1		Dynein light chain 1, cytoplasmic OS=Homo sapiens OX=9606 GN=DYNLL1 PE=1 SV=1	6.41488	5.66373	7.75	8.02607	7.23602	7.41557	8.82817	9.25552	-1.22015
1218	TRUE	Q9H254|SPTN4_HUMAN	17.93	0.43	1	1		Spectrin beta chain, non-erythrocytic 4 OS=Homo sapiens OX=9606 GN=SPTBN4 PE=1 SV=2	5.72652	5.78227	5.17187	4.68837	6.48888	5.35299	7.31593	7.08856	-1.21933
864	TRUE	O14745|NHRF1_HUMAN	25.17	10.89	3	3		Na(+)/H(+) exchange regulatory cofactor NHE-RF1 OS=Homo sapiens OX=9606 GN=SLC9A3R1 PE=1 SV=4	6.2893	5.71419	6.24308	6.27904	7.97572	8.36163	6.43585	6.5616	-1.2023
267	TRUE	P09211|GSTP1_HUMAN	26.16	49.52	8	8	Oxidation (M)	Glutathione S-transferase P OS=Homo sapiens OX=9606 GN=GSTP1 PE=1 SV=2	10.8333	10.6921	8.94944	9.13423	11.1913	11.1535	10.8859	11.1066	-1.18205
743	TRUE	P0DOX5|IGG1_HUMAN	17.99	21.6	6	5	Acetylation (N-term);Carbamidomethylation	Immunoglobulin gamma-1 heavy chain OS=Homo sapiens OX=9606 PE=1 SV=2	9.67926	9.48939	9.27515	9.3166	9.94976	9.87486	11.2661	11.3643	-1.17367
1121	TRUE	P08758|ANXA5_HUMAN	14.64	5	1	1		Annexin A5 OS=Homo sapiens OX=9606 GN=ANXA5 PE=1 SV=2	4.26685	4.41492	3.984	4.841	4.66843	4.71674	6.4885	6.27898	-1.16147
818	TRUE	P61225|RAP2B_HUMAN	16.5	22.95	5	3		Ras-related protein Rap-2b OS=Homo sapiens OX=9606 GN=RAP2B PE=1 SV=1	8.54376	8.36217	9.82302	9.86591	11.2325	11.1017	9.48437	9.41914	-1.16071
352	TRUE	P09543|CN37_HUMAN	30.36	19.95	7	7	Oxidation (M)	2',3'-cyclic-nucleotide 3'-phosphodiesterase OS=Homo sapiens OX=9606 GN=CNP PE=1 SV=2	7.21558	7.25791	7.69311	7.68976	8.9934	9.30828	8.03707	8.15135	-1.15843
358	TRUE	Q8WWI5|CTL1_HUMAN	13.01	12.48	7	7	Carbamidomethylation;Oxidation (M)	Choline transporter-like protein 1 OS=Homo sapiens OX=9606 GN=SLC44A1 PE=1 SV=1	8.95642	8.39911	8.68017	8.94362	11.4479	11.5331	8.22293	8.383	-1.15192
303	TRUE	O95817|BAG3_HUMAN	41.34	2.43	1	1		BAG family molecular chaperone regulator 3 OS=Homo sapiens OX=9606 GN=BAG3 PE=1 SV=3	4.56915	4.46229	4.51002	4.51518	5.98618	5.46157	5.50371	5.64998	-1.1362
635	TRUE	P13928|ANXA8_HUMAN	13.31	25.08	6	6	Oxidation (M)	Annexin A8 OS=Homo sapiens OX=9606 GN=ANXA8 PE=1 SV=3	6.66176	6.77201	6.27849	7.09729	7.16635	6.58777	8.72552	8.84471	-1.1287
418	TRUE	P35241|RADI_HUMAN	20.79	4.46	6	2	Oxidation (M)	Radixin OS=Homo sapiens OX=9606 GN=RDX PE=1 SV=1	4.06747	4.91925	5.52871	5.30464	6.71099	6.20996	5.19765	6.18404	-1.12064
142	TRUE	P07237|PDIA1_HUMAN	10.51	25.59	11	11	Oxidation (M)	Protein disulfide-isomerase OS=Homo sapiens OX=9606 GN=P4HB PE=1 SV=3	6.54862	6.65144	7.0032	7.04953	6.66348	6.71589	9.06836	9.12617	-1.08027
72	TRUE	P11021|BIP_HUMAN	7.41	34.25	20	17	Oxidation (M)	Endoplasmic reticulum chaperone BiP OS=Homo sapiens OX=9606 GN=HSPA5 PE=1 SV=2	8.21294	7.97088	7.69447	6.69748	6.33686	7.75201	10.3901	10.3928	-1.07399
108	TRUE	P55196|AFAD_HUMAN	21.24	0.71	1	1		Afadin OS=Homo sapiens OX=9606 GN=AFDN PE=1 SV=3	3.06232	2.32396	3.42962	4.30434	4.92047	4.4049	4.09238	3.96256	-1.06502
302	TRUE	Q01518|CAP1_HUMAN	21.48	14.53	6	6	Carbamidomethylation;Oxidation (M)	Adenylyl cyclase-associated protein 1 OS=Homo sapiens OX=9606 GN=CAP1 PE=1 SV=5	6.33694	7.10088	5.80454	7.0875	7.50723	7.21927	7.95599	7.89626	-1.06223
383	TRUE	P15531|NDKA_HUMAN	30.82	34.87	7	7	Oxidation (M)	Nucleoside diphosphate kinase A OS=Homo sapiens OX=9606 GN=NME1 PE=1 SV=1	8.44013	7.78649	7.21785	7.45193	8.61285	8.71897	8.94371	8.77786	-1.03925
842	TRUE	P27701|CD82_HUMAN	8.74	13.86	3	3	Oxidation (M)	CD82 antigen OS=Homo sapiens OX=9606 GN=CD82 PE=1 SV=1	7.48307	9.13854	9.97301	8.04625	11.4626	11.3608	8.02453	7.93066	-1.03442
831	TRUE	P09525|ANXA4_HUMAN	10.62	17.24	4	4	Oxidation (M)	Annexin A4 OS=Homo sapiens OX=9606 GN=ANXA4 PE=1 SV=4	5.64801	5.83689	6.65671	6.69962	6.07625	6.3493	8.32235	8.16068	-1.01684
337	TRUE	P06396|GELS_HUMAN	15.02	18.93	10	10	Carbamidomethylation;Oxidation (M)	Gelsolin OS=Homo sapiens OX=9606 GN=GSN PE=1 SV=1	8.17989	8.07819	8.24912	8.04959	8.22473	8.56104	9.83903	9.90757	-0.993899
365	TRUE	Q9BZQ8|NIBA1_HUMAN	16.83	1.51	1	1		Protein Niban 1 OS=Homo sapiens OX=9606 GN=NIBAN1 PE=1 SV=1	4.54743	5.09865	4.81336	4.76323	6.91138	6.99794	4.15364	5.11666	-0.989233
674	TRUE	Q96P63|SPB12_HUMAN	9.56	26.91	6	6	Oxidation (M)	Serpin B12 OS=Homo sapiens OX=9606 GN=SERPINB12 PE=1 SV=1	8.57721	8.5311	7.95503	7.88482	7.90458	7.91768	10.5134	10.5609	-0.987102
757	TRUE	P09758|TACD2_HUMAN	17.74	13	3	3		Tumor-associated calcium signal transducer 2 OS=Homo sapiens OX=9606 GN=TACSTD2 PE=1 SV=3	7.95	8.91517	9.25071	9.19458	10.7615	10.5719	8.91286	8.97384	-0.977399
85	TRUE	Q03001|DYST_HUMAN	16.95	0.12	1	1		Dystonin OS=Homo sapiens OX=9606 GN=DST PE=1 SV=4	5.34344	5.726	3.8349	2.46801	7.84042	7.01093	4.39451	2.02076	-0.973569
1056	TRUE	P01834|IGKC_HUMAN	6.59	31.78	2	2		Immunoglobulin kappa constant OS=Homo sapiens OX=9606 GN=IGKC PE=1 SV=2	7.40827	6.95139	5.56856	7.31192	6.56388	5.46945	9.5362	9.53435	-0.965935
1056	TRUE	P0DOX7|IGK_HUMAN	6.59	15.89	2	2		Immunoglobulin kappa light chain OS=Homo sapiens OX=9606 PE=1 SV=1	7.40827	6.95139	5.56856	7.31192	6.56388	5.46945	9.5362	9.53435	-0.965935
234	TRUE	Q9UQB8|BAIP2_HUMAN	25.23	13.41	6	6	Oxidation (M)	Brain-specific angiogenesis inhibitor 1-associated protein 2 OS=Homo sapiens OX=9606 GN=BAIAP2 PE=1 SV=1	6.60409	6.47734	7.05603	6.98345	8.19676	8.56635	7.0511	7.15591	-0.962303
482	TRUE	P51572|BAP31_HUMAN	65.72	4.47	1	1		B-cell receptor-associated protein 31 OS=Homo sapiens OX=9606 GN=BCAP31 PE=1 SV=3	4.01213	2.29284	2.10235	3.2778	2.22512	1.60172	5.92928	5.58182	-0.913206
929	TRUE	Q9UHG3|PCYOX_HUMAN	90.14	1.78	1	1		Prenylcysteine oxidase 1 OS=Homo sapiens OX=9606 GN=PCYOX1 PE=1 SV=3	3.97962	2.68439	3.11009	3.10663	4.52883	4.18426	4.07299	3.64744	-0.888199
676	TRUE	O95716|RAB3D_HUMAN	26.62	6.85	1	1		Ras-related protein Rab-3D OS=Homo sapiens OX=9606 GN=RAB3D PE=1 SV=1	4.72313	4.83907	4.68944	5.66313	6.21065	5.96806	5.65754	5.57477	-0.874063
319	TRUE	Q8IWA5|CTL2_HUMAN	11.4	16.57	12	12	Acetylation (N-term);Carbamidomethylation	Choline transporter-like protein 2 OS=Homo sapiens OX=9606 GN=SLC44A2 PE=1 SV=3	9.12973	9.94491	9.50964	9.85198	11.9664	12.0125	8.97424	8.96331	-0.870055
1126	TRUE	P49006|MRP_HUMAN	10.54	7.69	1	1		MARCKS-related protein OS=Homo sapiens OX=9606 GN=MARCKSL1 PE=1 SV=2	6.41721	4.54916	5.60661	6.25696	7.92748	7.96571	4.92022	5.44278	-0.856562
440	TRUE	P51149|RAB7A_HUMAN	15.15	44.93	8	8	Oxidation (M)	Ras-related protein Rab-7a OS=Homo sapiens OX=9606 GN=RAB7A PE=1 SV=1	8.57578	8.56416	10.0836	10.0872	10.4864	10.4062	9.91766	9.92493	-0.856109
275	TRUE	O14936|CSKP_HUMAN	16.61	7.67	5	5		Peripheral plasma membrane protein CASK OS=Homo sapiens OX=9606 GN=CASK PE=1 SV=3	4.76491	5.24596	5.79379	5.51251	6.99895	7.28864	5.20846	5.2429	-0.855447
480	TRUE	Q9H6S3|ES8L2_HUMAN	22.6	1.82	1	1		Epidermal growth factor receptor kinase substrate 8-like protein 2 OS=Homo sapiens OX=9606 GN=EPS8L2 PE=1 SV=2	3.39196	3.105	4.06862	3.88289	4.65815	4.69589	3.99267	4.52116	-0.85485
709	TRUE	P09493|TPM1_HUMAN	7.7	12.32	5	5	Oxidation (M)	Tropomyosin alpha-1 chain OS=Homo sapiens OX=9606 GN=TPM1 PE=1 SV=2	7.36081	7.04344	6.74091	6.91331	7.17805	5.70002	9.33603	9.25696	-0.853149
867	TRUE	Q8NG11|TSN14_HUMAN	25.1	17.78	4	4	Carbamidomethylation	Tetraspanin-14 OS=Homo sapiens OX=9606 GN=TSPAN14 PE=1 SV=1	10.1111	10.0348	10.0689	9.93951	11.7175	11.7228	10.0248	10.0758	-0.846682
20	TRUE	P35908|K22E_HUMAN	35.27	69.64	71	49	Oxidation (M)	Keratin, type II cytoskeletal 2 epidermal OS=Homo sapiens OX=9606 GN=KRT2 PE=1 SV=2	14.6107	14.5787	14.6538	14.6687	15.5772	15.4471	15.4086	15.4594	-0.845081
188	TRUE	Q9H223|EHD4_HUMAN	21.87	26.8	15	12	Oxidation (M)	EH domain-containing protein 4 OS=Homo sapiens OX=9606 GN=EHD4 PE=1 SV=1	9.41567	9.19303	8.69677	10.1742	11.0084	10.626	9.55695	9.6262	-0.834475
595	TRUE	O00299|CLIC1_HUMAN	27.65	15.77	3	3	Oxidation (M)	Chloride intracellular channel protein 1 OS=Homo sapiens OX=9606 GN=CLIC1 PE=1 SV=4	8.51223	8.98915	9.15074	9.27151	10.0055	10.1189	9.5648	9.56674	-0.833068
332	TRUE	P56199|ITA1_HUMAN	27.24	1.02	1	1		Integrin alpha-1 OS=Homo sapiens OX=9606 GN=ITGA1 PE=1 SV=2	6.26625	6.38499	5.37995	4.86334	7.4802	6.48843	6.06366	6.18592	-0.83092
5	TRUE	P04264|K2C1_HUMAN	13.18	69.1	118	102	Acetylation (N-term);Carbamidomethylation;Oxidation (M)	Keratin, type II cytoskeletal 1 OS=Homo sapiens OX=9606 GN=KRT1 PE=1 SV=6	15.8588	15.8595	15.5394	15.5647	15.7172	15.7337	17.289	17.3647	-0.820536
1147	TRUE	Q13515|BFSP2_HUMAN	9.33	2.65	1	1	Oxidation (M)	Phakinin OS=Homo sapiens OX=9606 GN=BFSP2 PE=1 SV=1	9.36789	9.30286	9.57288	9.59569	9.13501	9.12906	11.4363	11.4196	-0.82015
936	TRUE	O60669|MOT2_HUMAN	12.12	6.69	3	3		Monocarboxylate transporter 2 OS=Homo sapiens OX=9606 GN=SLC16A7 PE=1 SV=2	8.01228	7.66687	9.28373	9.3847	10.2706	10.4211	8.31133	8.61636	-0.817958
51	TRUE	P29317|EPHA2_HUMAN	13.47	20.59	17	15	Oxidation (M)	Ephrin type-A receptor 2 OS=Homo sapiens OX=9606 GN=EPHA2 PE=1 SV=2	8.85641	9.87214	10.7272	10.7542	11.6165	11.5404	10.1735	10.136	-0.814137
1024	TRUE	Q8IW75|SPA12_HUMAN	63.62	9.66	3	3		Serpin A12 OS=Homo sapiens OX=9606 GN=SERPINA12 PE=1 SV=1	3.06247	2.87023	2.46438	3.99337	2.07929	3.66515	5.12599	4.76658	-0.811641
379	TRUE	Q96FQ6|S10AG_HUMAN	20.78	64.08	8	8	Oxidation (M)	Protein S100-A16 OS=Homo sapiens OX=9606 GN=S100A16 PE=1 SV=1	11.093	11.0442	11.509	11.5617	12.8073	12.997	11.3209	11.2936	-0.802704
67	TRUE	Q13308|PTK7_HUMAN	18.43	8.41	8	8		Inactive tyrosine-protein kinase 7 OS=Homo sapiens OX=9606 GN=PTK7 PE=1 SV=2	7.29919	7.07892	7.70112	7.40324	9.07325	9.16526	7.24203	7.20584	-0.800979
199	TRUE	Q9H4M9|EHD1_HUMAN	20.62	21.91	13	8	Oxidation (M)	EH domain-containing protein 1 OS=Homo sapiens OX=9606 GN=EHD1 PE=1 SV=2	8.25486	7.92643	8.36825	8.1084	9.79255	9.68994	8.66743	7.68948	-0.795365
1287	TRUE	Q9H3Z4|DNJC5_HUMAN	10.22	7.07	1	1		DnaJ homolog subfamily C member 5 OS=Homo sapiens OX=9606 GN=DNAJC5 PE=1 SV=1	6.41491	7.985	9.05174	9.0239	9.51838	9.72828	8.22268	8.18482	-0.79465
161	TRUE	P63010|AP2B1_HUMAN	11.4	4.16	3	3		AP-2 complex subunit beta OS=Homo sapiens OX=9606 GN=AP2B1 PE=1 SV=1	4.44875	6.96503	6.69947	6.69304	7.84103	7.55977	6.34258	6.22491	-0.790504
515	TRUE	P23528|COF1_HUMAN	22.61	46.39	6	6	Acetylation (N-term)	Cofilin-1 OS=Homo sapiens OX=9606 GN=CFL1 PE=1 SV=3	9.01149	9.04057	9.10668	9.2373	9.4916	9.84997	10.0956	10.1149	-0.789003
97	TRUE	P00533|EGFR_HUMAN	16.52	10.17	11	10	Oxidation (M)	Epidermal growth factor receptor OS=Homo sapiens OX=9606 GN=EGFR PE=1 SV=2	7.28377	7.41076	8.43473	7.82526	8.86679	9.63949	7.77206	7.79634	-0.780038
235	TRUE	P32926|DSG3_HUMAN	8.62	3.7	3	3	Oxidation (M)	Desmoglein-3 OS=Homo sapiens OX=9606 GN=DSG3 PE=1 SV=2	6.37962	5.43413	6.25933	7.04277	6.61131	9.61371	6.01859	5.9873	-0.778763
689	TRUE	Q96BM9|ARL8A_HUMAN	15.92	8.06	1	1		ADP-ribosylation factor-like protein 8A OS=Homo sapiens OX=9606 GN=ARL8A PE=1 SV=1	4.62975	4.39749	5.06642	4.81794	5.77068	4.48542	5.83213	5.88825	-0.766219
420	TRUE	P06744|G6PI_HUMAN	12.76	10.22	4	4		Glucose-6-phosphate isomerase OS=Homo sapiens OX=9606 GN=GPI PE=1 SV=4	7.20382	6.47059	6.88289	6.92321	7.20428	6.61005	8.36672	8.35304	-0.763393
790	TRUE	Q7Z402|TMC7_HUMAN	14.03	5.39	4	4	Oxidation (M)	Transmembrane channel-like protein 7 OS=Homo sapiens OX=9606 GN=TMC7 PE=1 SV=1	5.79708	6.06507	6.79985	6.88917	7.97383	8.28532	6.24208	6.07869	-0.757187
466	TRUE	P46459|NSF_HUMAN	7.05	1.48	1	1		Vesicle-fusing ATPase OS=Homo sapiens OX=9606 GN=NSF PE=1 SV=3	3.1808	3.81639	4.17893	4.01599	3.81834	3.55399	5.43967	5.40858	-0.757116
683	TRUE	P0DP23|CALM1_HUMAN	5.12	32.21	5	5	Oxidation (M)	Calmodulin-1 OS=Homo sapiens OX=9606 GN=CALM1 PE=1 SV=1	7.86861	6.25275	7.24219	7.26747	6.77649	5.24229	9.73115	9.84876	-0.741912
683	TRUE	P0DP24|CALM2_HUMAN	5.12	32.21	5	5	Oxidation (M)	Calmodulin-2 OS=Homo sapiens OX=9606 GN=CALM2 PE=1 SV=1	7.86861	6.25275	7.24219	7.26747	6.77649	5.24229	9.73115	9.84876	-0.741912
683	TRUE	P0DP25|CALM3_HUMAN	5.12	32.21	5	5	Oxidation (M)	Calmodulin-3 OS=Homo sapiens OX=9606 GN=CALM3 PE=1 SV=1	7.86861	6.25275	7.24219	7.26747	6.77649	5.24229	9.73115	9.84876	-0.741912
1007	TRUE	P54920|SNAA_HUMAN	15.98	10.51	2	2		Alpha-soluble NSF attachment protein OS=Homo sapiens OX=9606 GN=NAPA PE=1 SV=3	4.33721	5.12223	5.6113	5.71041	5.97422	5.70212	5.70472	6.34375	-0.735915
155	TRUE	Q07065|CKAP4_HUMAN	55.13	17.61	8	8		Cytoskeleton-associated protein 4 OS=Homo sapiens OX=9606 GN=CKAP4 PE=1 SV=2	3.33485	4.47824	3.97569	2.82389	2.84382	1.88226	5.94873	6.8813	-0.735858
176	TRUE	O94832|MYO1D_HUMAN	27.95	4.17	3	3		Unconventional myosin-Id OS=Homo sapiens OX=9606 GN=MYO1D PE=1 SV=2	5.278	5.75555	4.82447	5.83009	6.83691	6.49701	5.66425	5.59444	-0.726122
1332	TRUE	P61077|UB2D3_HUMAN	13.08	7.48	1	1		Ubiquitin-conjugating enzyme E2 D3 OS=Homo sapiens OX=9606 GN=UBE2D3 PE=1 SV=1	4.96734	4.70365	3.92851	2.74547	5.17788	4.04584	5.05276	4.94859	-0.720025
1013	TRUE	P49755|TMEDA_HUMAN	17.06	9.59	2	2		Transmembrane emp24 domain-containing protein 10 OS=Homo sapiens OX=9606 GN=TMED10 PE=1 SV=2	5.82541	5.60022	6.11852	6.25622	6.42825	6.18557	7.0192	6.97594	-0.702148
1383	TRUE	P51178|PLCD1_HUMAN	64.05	1.32	1	1		1-phosphatidylinositol 4,5-bisphosphate phosphodiesterase delta-1 OS=Homo sapiens OX=9606 GN=PLCD1 PE=1 SV=2	2.48419	3.40321	3.40252	4.19968	2.46211	4.42211	4.80695	4.5941	-0.698919
868	TRUE	P21926|CD9_HUMAN	24.36	4.39	2	2		CD9 antigen OS=Homo sapiens OX=9606 GN=CD9 PE=1 SV=4	10.2176	10.056	10.3196	10.3252	11.7243	11.538	10.0546	10.3251	-0.680912
1310	TRUE	P01780|HV307_HUMAN	11.2	16.24	1	1		Immunoglobulin heavy variable 3-7 OS=Homo sapiens OX=9606 GN=IGHV3-7 PE=1 SV=2	2.32754	3.85844	3.59791	3.60269	3.78366	3.79698	3.67459	4.83812	-0.676695
43	TRUE	O15031|PLXB2_HUMAN	9.74	17.41	23	23	Oxidation (M)	Plexin-B2 OS=Homo sapiens OX=9606 GN=PLXNB2 PE=1 SV=3	7.91539	7.64903	9.18426	9.32584	10.4222	10.2881	7.97788	8.07846	-0.673027
465	TRUE	P04040|CATA_HUMAN	9.18	16.13	6	6		Catalase OS=Homo sapiens OX=9606 GN=CAT PE=1 SV=3	7.30412	7.75001	7.88272	7.80312	6.90378	7.98002	9.33168	9.1154	-0.647729
681	TRUE	P62491|RB11A_HUMAN	18.74	14.81	3	3	Acetylation (N-term)	Ras-related protein Rab-11A OS=Homo sapiens OX=9606 GN=RAB11A PE=1 SV=3	8.91882	7.11147	7.80267	8.22277	8.81419	8.95504	8.41128	8.43027	-0.638761
406	TRUE	P61204|ARF3_HUMAN	22.13	31.49	6	4	Oxidation (M)	ADP-ribosylation factor 3 OS=Homo sapiens OX=9606 GN=ARF3 PE=1 SV=2	8.80405	8.93225	9.53478	9.45055	10.3504	10.267	9.30943	9.34684	-0.638004
406	TRUE	P84077|ARF1_HUMAN	22.13	31.49	6	4	Oxidation (M)	ADP-ribosylation factor 1 OS=Homo sapiens OX=9606 GN=ARF1 PE=1 SV=2	8.80405	8.93225	9.53478	9.45055	10.3504	10.267	9.30943	9.34684	-0.638004
295	TRUE	P61106|RAB14_HUMAN	16.75	39.53	7	7	Oxidation (M)	Ras-related protein Rab-14 OS=Homo sapiens OX=9606 GN=RAB14 PE=1 SV=4	7.82717	7.66846	8.62163	8.44697	8.53736	8.77778	8.9784	8.8099	-0.634802
306	TRUE	Q9NZN4|EHD2_HUMAN	12.88	6.45	5	3	Oxidation (M)	EH domain-containing protein 2 OS=Homo sapiens OX=9606 GN=EHD2 PE=1 SV=2	6.02819	5.99639	6.40367	7.34234	7.96662	8.09486	6.13256	6.1147	-0.63454
1161	TRUE	O95471|CLD7_HUMAN	5.73	7.58	1	1	Oxidation (M)	Claudin-7 OS=Homo sapiens OX=9606 GN=CLDN7 PE=1 SV=4	6.69742	8.98286	7.84039	7.63142	10.4405	10.5012	6.05896	6.6642	-0.628184
214	TRUE	P13797|PLST_HUMAN	7.5	22.06	11	11	Acetylation (N-term);Oxidation (M)	Plastin-3 OS=Homo sapiens OX=9606 GN=PLS3 PE=1 SV=4	7.40692	6.82851	8.6933	8.42628	7.61926	7.45679	9.22679	9.55361	-0.625362
698	TRUE	P29992|GNA11_HUMAN	2.14	3.62	2	1		Guanine nucleotide-binding protein subunit alpha-11 OS=Homo sapiens OX=9606 GN=GNA11 PE=1 SV=2	3.64022	4.0531	5.74985	4.9386	6.20875	6.29248	3.80988	4.56611	-0.623863
1406	TRUE	Q9BRF8|CPPED_HUMAN	50.09	3.5	1	1	Acetylation (N-term)	Serine/threonine-protein phosphatase CPPED1 OS=Homo sapiens OX=9606 GN=CPPED1 PE=1 SV=3	4.33386	2.1415	3.08486	2.48797	3.2545	3.42982	4.705	3.07612	-0.604312
314	TRUE	P26232|CTNA2_HUMAN	11.13	1.89	5	1		Catenin alpha-2 OS=Homo sapiens OX=9606 GN=CTNNA2 PE=1 SV=5	8.56974	7.9849	9.55911	9.67845	10.3602	10.5131	8.71424	8.61933	-0.603686
1200	TRUE	O95858|TSN15_HUMAN	5.79	6.8	2	2	Oxidation (M)	Tetraspanin-15 OS=Homo sapiens OX=9606 GN=TSPAN15 PE=1 SV=1	6.25574	4.12279	4.60528	6.49957	7.87642	7.71042	3.64841	4.62557	-0.59436
1292	TRUE	P51157|RAB28_HUMAN	8.47	4.98	1	1		Ras-related protein Rab-28 OS=Homo sapiens OX=9606 GN=RAB28 PE=1 SV=2	6.42113	5.47434	8.08111	7.86701	7.34948	7.45336	7.80471	7.56142	-0.581345
467	TRUE	P55011|S12A2_HUMAN	15.87	0.99	1	1		Solute carrier family 12 member 2 OS=Homo sapiens OX=9606 GN=SLC12A2 PE=1 SV=1	3.10486	2.85895	3.22713	3.58554	4.92586	4.84015	2.4068	2.92221	-0.579639
254	TRUE	Q08174|PCDH1_HUMAN	23.09	1.23	1	1	Oxidation (M)	Protocadherin-1 OS=Homo sapiens OX=9606 GN=PCDH1 PE=1 SV=2	4.357	4.19391	4.24584	4.05648	5.29499	5.38621	3.87735	4.58123	-0.57164
437	TRUE	P61026|RAB10_HUMAN	14.64	26.5	5	5		Ras-related protein Rab-10 OS=Homo sapiens OX=9606 GN=RAB10 PE=1 SV=1	8.34054	8.21119	9.0554	9.23396	9.96797	10.1531	8.56108	8.43224	-0.568314
637	TRUE	P35613|BASI_HUMAN	14.28	15.32	4	4	Oxidation (M)	Basigin OS=Homo sapiens OX=9606 GN=BSG PE=1 SV=2	9.81794	9.89698	10.6501	10.7127	11.6698	11.681	9.94096	10.0111	-0.556271
479	TRUE	P01111|RASN_HUMAN	7.06	4.76	7	1		GTPase NRas OS=Homo sapiens OX=9606 GN=NRAS PE=1 SV=1	6.23493	6.38402	6.1661	3.03502	7.38214	6.99543	4.93284	4.72509	-0.553859
25	TRUE	P08195|4F2_HUMAN	17.31	50.79	43	43	Oxidation (M)	4F2 cell-surface antigen heavy chain OS=Homo sapiens OX=9606 GN=SLC3A2 PE=1 SV=3	14.0108	14.0009	14.4482	14.4951	15.6173	15.6035	13.9195	14.0078	-0.548275
821	TRUE	Q9UKE5|TNIK_HUMAN	15.53	3.6	4	4		TRAF2 and NCK-interacting protein kinase OS=Homo sapiens OX=9606 GN=TNIK PE=1 SV=1	7.82775	7.98853	8.23027	6.5676	9.33383	8.57177	7.42958	7.46509	-0.546534
98	TRUE	P23634|AT2B4_HUMAN	9.42	15.95	24	15	Carbamidomethylation;Oxidation (M)	Plasma membrane calcium-transporting ATPase 4 OS=Homo sapiens OX=9606 GN=ATP2B4 PE=1 SV=2	9.72762	9.67141	11.5759	11.6339	11.7238	11.794	10.5928	10.6714	-0.5433
1310	TRUE	A0A0C4DH30|HV316_HUMAN	11.2	16.24	1	1		Probable non-functional immunoglobulin heavy variable 3-16 OS=Homo sapiens OX=9606 GN=IGHV3-16 PE=1 SV=1	2.86127	3.85844	3.59791	3.60269	3.78366	3.79698	3.67459	4.83812	-0.543263
318	TRUE	Q01650|LAT1_HUMAN	13.05	15.19	5	5	Carbamidomethylation;Oxidation (M)	Large neutral amino acids transporter small subunit 1 OS=Homo sapiens OX=9606 GN=SLC7A5 PE=1 SV=2	11.5166	11.3875	11.4012	11.5329	13.3825	12.9377	10.7351	10.9126	-0.53242
725	TRUE	P18084|ITB5_HUMAN	12.45	3.13	2	2		Integrin beta-5 OS=Homo sapiens OX=9606 GN=ITGB5 PE=1 SV=1	7.50411	7.00253	8.1163	8.33253	9.27764	9.03881	7.36635	7.3952	-0.530635
409	TRUE	P21281|VATB2_HUMAN	7.88	10.76	5	5		V-type proton ATPase subunit B, brain isoform OS=Homo sapiens OX=9606 GN=ATP6V1B2 PE=1 SV=3	8.12297	8.09624	7.23074	7.92114	7.79544	6.84325	9.19687	9.64823	-0.528174
58	TRUE	P11142|HSP7C_HUMAN	17.8	32.04	25	16	Oxidation (M)	Heat shock cognate 71 kDa protein OS=Homo sapiens OX=9606 GN=HSPA8 PE=1 SV=1	10.6056	10.4892	10.7002	10.7951	10.8516	10.9336	11.4169	11.4877	-0.524908
533	TRUE	P21796|VDAC1_HUMAN	22.99	3.89	1	1		Voltage-dependent anion-selective channel protein 1 OS=Homo sapiens OX=9606 GN=VDAC1 PE=1 SV=2	4.76872	4.74397	5.06387	4.6632	5.81628	6.07349	4.42658	5.01762	-0.523553
396	TRUE	P08865|RSSA_HUMAN	19.33	9.83	2	2	Acetylation (N-term);Oxidation (M)	40S ribosomal protein SA OS=Homo sapiens OX=9606 GN=RPSA PE=1 SV=4	4.51784	3.09094	5.79577	5.76498	2.96324	3.31543	7.71915	7.25493	-0.520802
649	TRUE	Q9H2K8|TAOK3_HUMAN	12.1	1.45	1	1		Serine/threonine-protein kinase TAO3 OS=Homo sapiens OX=9606 GN=TAOK3 PE=1 SV=2	4.1062	2.52543	4.32795	4.18689	4.07604	4.91477	4.18094	4.03013	-0.513853
380	TRUE	P12931|SRC_HUMAN	11.07	18.84	9	7		Proto-oncogene tyrosine-protein kinase Src OS=Homo sapiens OX=9606 GN=SRC PE=1 SV=3	7.09859	7.74198	6.21156	6.72983	8.69868	8.62426	5.75866	6.74992	-0.51239
42	TRUE	O75051|PLXA2_HUMAN	13.02	15.52	32	24	Oxidation (M)	Plexin-A2 OS=Homo sapiens OX=9606 GN=PLXNA2 PE=1 SV=4	9.22915	9.211	10.0376	10.0036	11.0739	11.0416	9.25276	9.15938	-0.511597
1310	TRUE	A0A0B4J1Y9|HV372_HUMAN	11.2	15.97	1	1		Immunoglobulin heavy variable 3-72 OS=Homo sapiens OX=9606 GN=IGHV3-72 PE=3 SV=1	3.03413	3.85844	3.59791	3.60269	3.78366	3.79698	3.67459	4.83812	-0.500048
9	TRUE	P10586|PTPRF_HUMAN	10.65	1.68	4	2		Receptor-type tyrosine-protein phosphatase F OS=Homo sapiens OX=9606 GN=PTPRF PE=1 SV=2	6.6244	6.11014	7.0259	7.40029	7.91379	8.69034	6.12404	6.41451	-0.49549
395	TRUE	Q06481|APLP2_HUMAN	7.1	1.83	1	1	Oxidation (M)	Amyloid-like protein 2 OS=Homo sapiens OX=9606 GN=APLP2 PE=1 SV=2	4.32241	4.63815	4.36087	4.57188	3.90604	3.74176	6.41845	5.80379	-0.494183
10	TRUE	P16144|ITB4_HUMAN	13.51	25.3	41	41	Carbamidomethylation;Oxidation (M)	Integrin beta-4 OS=Homo sapiens OX=9606 GN=ITGB4 PE=1 SV=5	12.1983	12.1348	13.1091	13.1355	13.8841	13.9077	12.3177	12.4284	-0.490096
636	TRUE	O15144|ARPC2_HUMAN	22.4	7.67	2	2	Oxidation (M)	Actin-related protein 2/3 complex subunit 2 OS=Homo sapiens OX=9606 GN=ARPC2 PE=1 SV=1	6.85412	6.61393	5.60748	6.43374	6.68984	6.88348	7.00214	6.87246	-0.484665
29	TRUE	P23229|ITA6_HUMAN	13.24	38.23	33	33	Carbamidomethylation;Oxidation (M)	Integrin alpha-6 OS=Homo sapiens OX=9606 GN=ITGA6 PE=1 SV=5	12.0775	12.0365	12.8008	12.8091	13.9101	13.7343	11.9838	12.0213	-0.481378
1361	TRUE	P19256|LFA3_HUMAN	11.19	4	1	1		Lymphocyte function-associated antigen 3 OS=Homo sapiens OX=9606 GN=CD58 PE=1 SV=1	7.97644	7.7717	9.19961	9.13501	9.71135	9.80175	8.21764	8.27169	-0.47992
701	TRUE	Q9P289|STK26_HUMAN	14.59	6.01	2	2		Serine/threonine-protein kinase 26 OS=Homo sapiens OX=9606 GN=STK26 PE=1 SV=2	4.44444	4.19939	5.30598	5.18474	5.98072	5.80361	4.42149	4.83262	-0.475972
360	TRUE	Q86X29|LSR_HUMAN	14.34	12.33	5	5	Oxidation (M)	Lipolysis-stimulated lipoprotein receptor OS=Homo sapiens OX=9606 GN=LSR PE=1 SV=4	7.87019	7.99845	8.15848	8.2552	9.31914	9.70561	7.60909	7.54759	-0.47478
251	TRUE	P07384|CAN1_HUMAN	13.13	8.4	5	5	Oxidation (M)	Calpain-1 catalytic subunit OS=Homo sapiens OX=9606 GN=CAPN1 PE=1 SV=1	7.04836	7.24818	6.8991	7.50862	7.03655	7.30689	8.05389	8.20439	-0.474367
970	TRUE	Q9UBI6|GBG12_HUMAN	11.15	56.94	3	3	Carbamidomethylation;Oxidation (M)	Guanine nucleotide-binding protein G(I)/G(S)/G(O) subunit gamma-12 OS=Homo sapiens OX=9606 GN=GNG12 PE=1 SV=3	8.31988	8.4672	9.07601	9.02049	10.4442	10.1477	8.22935	7.94183	-0.469884
1235	TRUE	Q969X1|LFG3_HUMAN	8.2	4.82	2	2		Protein lifeguard 3 OS=Homo sapiens OX=9606 GN=TMBIM1 PE=1 SV=2	7.23249	6.15885	8.42861	8.44459	8.83621	8.89256	7.31917	7.08182	-0.466304
154	TRUE	O00159|MYO1C_HUMAN	15.08	15.15	13	12	Oxidation (M)	Unconventional myosin-Ic OS=Homo sapiens OX=9606 GN=MYO1C PE=1 SV=4	8.10372	7.89891	8.88263	8.64023	9.58366	9.52229	8.06673	8.18952	-0.459174
270	TRUE	P26038|MOES_HUMAN	27.07	20.1	13	9	Oxidation (M)	Moesin OS=Homo sapiens OX=9606 GN=MSN PE=1 SV=3	7.69695	7.34022	7.62409	7.76995	8.15898	8.4983	7.66154	7.93827	-0.456471
33	TRUE	P46940|IQGA1_HUMAN	12.48	13.82	17	16	Oxidation (M)	Ras GTPase-activating-like protein IQGAP1 OS=Homo sapiens OX=9606 GN=IQGAP1 PE=1 SV=1	8.38807	7.35047	8.10977	7.62239	7.80774	7.92959	8.75662	8.80235	-0.456402
1310	TRUE	A0A0B4J1X5|HV374_HUMAN	11.2	16.24	1	1		Immunoglobulin heavy variable 3-74 OS=Homo sapiens OX=9606 GN=IGHV3-74 PE=3 SV=1	3.21737	3.85844	3.59791	3.60269	3.78366	3.79698	3.67459	4.83812	-0.454238
1310	TRUE	P01766|HV313_HUMAN	11.2	16.38	1	1		Immunoglobulin heavy variable 3-13 OS=Homo sapiens OX=9606 GN=IGHV3-13 PE=1 SV=2	3.22191	3.85844	3.59791	3.60269	3.78366	3.79698	3.67459	4.83812	-0.453102
48	TRUE	P35221|CTNA1_HUMAN	8.92	32.56	22	18	Acetylation (N-term);Carbamidomethylation;Oxidation (M)	Catenin alpha-1 OS=Homo sapiens OX=9606 GN=CTNNA1 PE=1 SV=1	9.97457	9.55973	11.0919	11.1253	11.9153	11.9554	9.84316	9.83957	-0.450467
453	TRUE	P13726|TF_HUMAN	9.65	25.08	7	7		Tissue factor OS=Homo sapiens OX=9606 GN=F3 PE=1 SV=1	12.6044	12.598	12.9904	13.0905	14.5919	14.558	11.9235	12.0049	-0.448758
1435	TRUE	Q8NHG7|SVIP_HUMAN	15.08	14.29	1	1		Small VCP/p97-interacting protein OS=Homo sapiens OX=9606 GN=SVIP PE=1 SV=1	3.53338	4.1817	4.75414	4.60856	4.86419	4.85085	4.46375	4.68874	-0.447434
82	TRUE	P12830|CADH1_HUMAN	12.31	12.59	9	9	Oxidation (M)	Cadherin-1 OS=Homo sapiens OX=9606 GN=CDH1 PE=1 SV=3	8.37768	9.25581	8.96191	8.38839	9.85239	10.53	7.94529	8.42305	-0.44174
905	TRUE	Q04760|LGUL_HUMAN	9.84	9.78	2	2	Oxidation (M)	Lactoylglutathione lyase OS=Homo sapiens OX=9606 GN=GLO1 PE=1 SV=4	6.36697	5.96089	4.71063	4.81636	4.95828	5.62093	6.57615	6.44141	-0.435479
602	TRUE	O15118|NPC1_HUMAN	12.42	0.94	1	1		NPC intracellular cholesterol transporter 1 OS=Homo sapiens OX=9606 GN=NPC1 PE=1 SV=2	3.3581	1.77805	3.17129	4.32747	4.23402	4.45336	3.56056	2.09128	-0.426079
622	TRUE	Q96CW1|AP2M1_HUMAN	15.65	2.3	1	1		AP-2 complex subunit mu OS=Homo sapiens OX=9606 GN=AP2M1 PE=1 SV=2	4.47165	4.03712	5.20394	4.97137	5.86045	5.23184	4.61029	4.67866	-0.424291
719	TRUE	P06703|S10A6_HUMAN	8.4	10	1	1	Oxidation (M)	Protein S100-A6 OS=Homo sapiens OX=9606 GN=S100A6 PE=1 SV=1	5.19691	4.78286	6.13028	6.14253	6.02258	5.08067	7.00104	5.80283	-0.413637
207	TRUE	Q6P4Q7|CNNM4_HUMAN	10.99	6.45	4	4	Oxidation (M)	Metal transporter CNNM4 OS=Homo sapiens OX=9606 GN=CNNM4 PE=1 SV=3	6.62204	6.5266	7.67287	7.64952	8.19	8.46836	6.96679	6.49626	-0.412597
172	TRUE	P54753|EPHB3_HUMAN	11.34	5.11	7	4	Oxidation (M)	Ephrin type-B receptor 3 OS=Homo sapiens OX=9606 GN=EPHB3 PE=1 SV=2	8.08239	8.74226	7.13652	5.94176	8.11116	8.44098	7.86463	7.13558	-0.412357
264	TRUE	Q9Y5Y6|ST14_HUMAN	22.47	9.01	5	5		Suppressor of tumorigenicity 14 protein OS=Homo sapiens OX=9606 GN=ST14 PE=1 SV=2	8.475	8.21731	7.98491	8.28898	9.20385	9.50431	7.81996	8.08511	-0.41176
1233	TRUE	Q92747|ARC1A_HUMAN	17.31	4.59	1	1		Actin-related protein 2/3 complex subunit 1A OS=Homo sapiens OX=9606 GN=ARPC1A PE=1 SV=2	4.59782	4.78502	4.15211	4.12433	4.47547	4.61348	4.77531	5.43511	-0.410023
672	TRUE	P01116|RASK_HUMAN	10.82	4.76	6	1		GTPase KRas OS=Homo sapiens OX=9606 GN=KRAS PE=1 SV=1	5.6335	5.72221	5.79504	5.15185	7.32853	7.06429	4.9482	4.59356	-0.407998
73	TRUE	O60716|CTND1_HUMAN	15.14	21.9	15	15	Oxidation (M)	Catenin delta-1 OS=Homo sapiens OX=9606 GN=CTNND1 PE=1 SV=1	8.51962	8.56744	8.00919	7.46695	9.35364	9.61017	7.54532	7.66892	-0.403717
957	TRUE	Q9H444|CHM4B_HUMAN	32.38	6.25	1	1		Charged multivesicular body protein 4b OS=Homo sapiens OX=9606 GN=CHMP4B PE=1 SV=1	4.45416	4.15031	3.78378	4.06014	4.95607	5.09978	4.08933	3.89829	-0.398771
192	TRUE	Q9Y2A7|NCKP1_HUMAN	20.42	5.94	6	6	Oxidation (M)	Nck-associated protein 1 OS=Homo sapiens OX=9606 GN=NCKAP1 PE=1 SV=1	7.28813	7.26486	7.38205	7.54551	8.26276	8.56423	6.9521	7.26172	-0.390064
378	TRUE	P08754|GNAI3_HUMAN	10.17	19.77	10	5	Oxidation (M)	Guanine nucleotide-binding protein G(i) subunit alpha OS=Homo sapiens OX=9606 GN=GNAI3 PE=1 SV=3	7.84338	7.81623	8.18025	8.26804	9.5612	9.57215	7.6575	6.87527	-0.389552
948	TRUE	Q6PCB8|EMB_HUMAN	9.19	3.98	1	1		Embigin OS=Homo sapiens OX=9606 GN=EMB PE=1 SV=1	6.67405	6.64293	6.84855	5.849	8.23864	8.19913	5.47858	5.65611	-0.389481
1211	TRUE	Q8NFJ5|RAI3_HUMAN	8.91	3.64	1	1		Retinoic acid-induced protein 3 OS=Homo sapiens OX=9606 GN=GPRC5A PE=1 SV=2	5.25159	5.56484	6.1297	6.10568	7.4029	7.39638	4.85944	4.95088	-0.389445
1140	TRUE	O75608|LYPA1_HUMAN	3.46	4.78	1	1		Acyl-protein thioesterase 1 OS=Homo sapiens OX=9606 GN=LYPLA1 PE=1 SV=1	4.92555	6.81875	6.50505	6.22477	3.84063	5.30922	8.45884	8.40315	-0.384432
282	TRUE	P63092|GNAS2_HUMAN	7.38	31.98	9	9	Oxidation (M)	Guanine nucleotide-binding protein G(s) subunit alpha isoforms short OS=Homo sapiens OX=9606 GN=GNAS PE=1 SV=1	7.72258	10.0407	8.65965	9.77397	10.6449	10.4907	8.26364	8.31383	-0.379025
282	TRUE	Q5JWF2|GNAS1_HUMAN	7.38	12.15	9	9	Oxidation (M)	Guanine nucleotide-binding protein G(s) subunit alpha isoforms XLas OS=Homo sapiens OX=9606 GN=GNAS PE=1 SV=2	7.72258	10.0407	8.65965	9.77397	10.6449	10.4907	8.26364	8.31383	-0.379025
31	TRUE	P13639|EF2_HUMAN	5.3	28.9	24	24	Carbamidomethylation;Oxidation (M)	Elongation factor 2 OS=Homo sapiens OX=9606 GN=EEF2 PE=1 SV=4	9.60519	9.46255	11.166	11.068	9.67843	9.58429	11.7247	11.8166	-0.375565
1397	TRUE	Q14802|FXYD3_HUMAN	12.01	21.84	1	1		FXYD domain-containing ion transport regulator 3 OS=Homo sapiens OX=9606 GN=FXYD3 PE=1 SV=1	4.86647	5.27706	6.14083	6.25139	6.03996	6.59686	5.76448	5.62464	-0.372547
1310	TRUE	A0A0J9YX35|HV64D_HUMAN	11.2	16.24	1	1		Immunoglobulin heavy variable 3-64D OS=Homo sapiens OX=9606 GN=IGHV3-64D PE=3 SV=1	3.58834	3.85844	3.59791	3.60269	3.78366	3.79698	3.67459	4.83812	-0.361495
830	TRUE	P61421|VA0D1_HUMAN	14.94	13.39	4	4		V-type proton ATPase subunit d 1 OS=Homo sapiens OX=9606 GN=ATP6V0D1 PE=1 SV=1	7.82295	7.67933	8.2626	7.75011	9.02768	9.13144	7.39013	7.39295	-0.356805
633	TRUE	P30511|HLAF_HUMAN	17.4	13.29	3	3		HLA class I histocompatibility antigen, alpha chain F OS=Homo sapiens OX=9606 GN=HLA-F PE=1 SV=3	6.45972	6.33675	6.46906	6.46323	7.52103	7.66397	6.07669	5.88249	-0.353857
503	TRUE	P05120|PAI2_HUMAN	5.61	20	8	8	Oxidation (M)	Plasminogen activator inhibitor 2 OS=Homo sapiens OX=9606 GN=SERPINB2 PE=1 SV=2	6.47085	6.25612	7.55418	7.44075	6.17733	6.23527	8.33309	8.36447	-0.347066
824	TRUE	Q92542|NICA_HUMAN	19.48	1.55	1	1		Nicastrin OS=Homo sapiens OX=9606 GN=NCSTN PE=1 SV=2	4.32047	4.55304	4.65222	3.96316	5.49358	5.35673	4.06886	3.94442	-0.343674
1021	TRUE	P02675|FIBB_HUMAN	5.96	8.55	3	3		Fibrinogen beta chain OS=Homo sapiens OX=9606 GN=FGB PE=1 SV=2	4.16889	4.4827	4.7889	4.48726	3.79797	3.55457	6.02724	5.91533	-0.341838
34	TRUE	P13645|K1C10_HUMAN	70.14	59.42	53	50	Acetylation (N-term);Carbamidomethylation;Oxidation (M)	Keratin, type I cytoskeletal 10 OS=Homo sapiens OX=9606 GN=KRT10 PE=1 SV=6	14.6848	14.7158	14.2556	14.3238	15.1723	15.1085	14.5016	14.5627	-0.341292
857	TRUE	O15431|COPT1_HUMAN	7.19	10	1	1	Oxidation (M)	High affinity copper uptake protein 1 OS=Homo sapiens OX=9606 GN=SLC31A1 PE=1 SV=1	6.32879	4.75019	5.80403	5.56491	5.4284	8.05787	5.00468	5.31792	-0.340239
230	TRUE	P30153|2AAA_HUMAN	24.24	13.41	6	6		Serine/threonine-protein phosphatase 2A 65 kDa regulatory subunit A alpha isoform OS=Homo sapiens OX=9606 GN=PPP2R1A PE=1 SV=4	6.23493	6.60037	6.71006	6.13385	6.90535	6.7651	6.68289	6.65225	-0.331593
663	TRUE	P10301|RRAS_HUMAN	16.3	20.64	4	3		Ras-related protein R-Ras OS=Homo sapiens OX=9606 GN=RRAS PE=1 SV=1	8.04491	7.79685	7.67521	7.5797	9.25357	8.71507	7.39119	7.06097	-0.33103
708	TRUE	P50148|GNAQ_HUMAN	9.74	4.18	2	1		Guanine nucleotide-binding protein G(q) subunit alpha OS=Homo sapiens OX=9606 GN=GNAQ PE=1 SV=4	5.11827	6.00143	6.52276	6.72284	5.95223	7.04964	6.36182	6.25067	-0.312266
1245	TRUE	Q92743|HTRA1_HUMAN	8.62	2.08	1	1		Serine protease HTRA1 OS=Homo sapiens OX=9606 GN=HTRA1 PE=1 SV=1	3.21811	3.05957	3.69946	3.60493	3.94636	3.92032	3.91314	3.02796	-0.306429
805	TRUE	P61006|RAB8A_HUMAN	8.55	5.8	1	1		Ras-related protein Rab-8A OS=Homo sapiens OX=9606 GN=RAB8A PE=1 SV=1	5.50546	5.32242	6.67533	7.06833	7.41146	6.8108	5.79203	5.68683	-0.282395
83	TRUE	P29323|EPHB2_HUMAN	20.87	8.91	10	7	Oxidation (M)	Ephrin type-B receptor 2 OS=Homo sapiens OX=9606 GN=EPHB2 PE=1 SV=5	7.94627	7.76312	7.36658	7.59716	7.57529	8.30685	7.96267	7.95407	-0.281438
759	TRUE	Q9NUP9|LIN7C_HUMAN	18.85	17.26	3	3	Acetylation (N-term);Oxidation (M)	Protein lin-7 homolog C OS=Homo sapiens OX=9606 GN=LIN7C PE=1 SV=1	7.19309	7.23937	7.44998	7.40745	8.08628	8.35571	6.79956	7.1393	-0.272741
1310	TRUE	A0A0C4DH35|HV335_HUMAN	11.2	16.24	1	1		Probable non-functional immunoglobulin heavy variable 3-35 OS=Homo sapiens OX=9606 GN=IGHV3-35 PE=1 SV=1	4.0605	3.85844	3.59791	3.60269	3.78366	3.79698	3.67459	4.83812	-0.243454
419	TRUE	Q15084|PDIA6_HUMAN	5.22	9.77	3	3		Protein disulfide-isomerase A6 OS=Homo sapiens OX=9606 GN=PDIA6 PE=1 SV=1	4.31977	4.23986	6.08479	6.48112	5.384	4.54023	6.01572	6.14364	-0.239515
116	TRUE	P25705|ATPA_HUMAN	12.59	8.68	4	4		ATP synthase subunit alpha, mitochondrial OS=Homo sapiens OX=9606 GN=ATP5F1A PE=1 SV=1	6.13572	7.05351	6.94815	6.90316	7.13768	6.4983	7.20876	7.13528	-0.234869
69	TRUE	P26006|ITA3_HUMAN	10.8	28.16	23	23	Carbamidomethylation;Oxidation (M)	Integrin alpha-3 OS=Homo sapiens OX=9606 GN=ITGA3 PE=1 SV=5	12.2261	12.2608	12.9396	12.9843	13.7131	13.6541	12.0348	11.9102	-0.225339
272	TRUE	Q9NPH3|IL1AP_HUMAN	2.98	3.68	2	2		Interleukin-1 receptor accessory protein OS=Homo sapiens OX=9606 GN=IL1RAP PE=1 SV=2	3.5986	4.32775	5.20945	5.14542	6.1709	5.9025	4.1248	2.98113	-0.224526
47	TRUE	P68104|EF1A1_HUMAN	5.35	36.8	15	15	Carbamidomethylation;Oxidation (M)	Elongation factor 1-alpha 1 OS=Homo sapiens OX=9606 GN=EEF1A1 PE=1 SV=1	9.74463	9.97621	11.1861	11.1987	9.67957	10.1618	11.6132	11.5231	-0.218019
90	TRUE	Q15075|EEA1_HUMAN	14.46	1.49	2	2		Early endosome antigen 1 OS=Homo sapiens OX=9606 GN=EEA1 PE=1 SV=2	3.87498	4.29069	3.07928	3.50973	2.69973	2.57316	4.97266	5.35492	-0.211447
906	TRUE	Q9H190|SDCB2_HUMAN	9.68	10.96	3	3	Oxidation (M)	Syntenin-2 OS=Homo sapiens OX=9606 GN=SDCBP2 PE=1 SV=2	6.19422	6.16778	7.36682	7.43186	7.00285	7.14781	7.00659	6.8346	-0.207792
101	TRUE	O00571|DDX3X_HUMAN	4.49	14.65	8	8		ATP-dependent RNA helicase DDX3X OS=Homo sapiens OX=9606 GN=DDX3X PE=1 SV=3	6.6722	6.81467	7.05987	7.11137	5.67167	5.95025	8.42308	8.43658	-0.205871
405	TRUE	P20339|RAB5A_HUMAN	6.38	13.02	5	2	Oxidation (M)	Ras-related protein Rab-5A OS=Homo sapiens OX=9606 GN=RAB5A PE=1 SV=2	5.76357	6.88054	7.46683	7.49933	6.09738	7.51846	7.44147	7.30656	-0.188402
1199	TRUE	Q08722|CD47_HUMAN	8.77	3.41	1	1		Leukocyte surface antigen CD47 OS=Homo sapiens OX=9606 GN=CD47 PE=1 SV=1	5.96134	6.0658	6.45522	6.71461	6.698	7.98912	5.51221	5.73617	-0.184631
1453	TRUE	Q8TC92|ENOX1_HUMAN	10.87	2.64	1	1	Carbamidomethylation;Oxidation (M)	Ecto-NOX disulfide-thiol exchanger 1 OS=Homo sapiens OX=9606 GN=ENOX1 PE=1 SV=1	7.22426	6.98753	6.49158	6.15692	6.2432	6.84827	7.52475	6.94324	-0.174791
755	TRUE	Q8WUD1|RAB2B_HUMAN	21.77	17.13	3	3		Ras-related protein Rab-2B OS=Homo sapiens OX=9606 GN=RAB2B PE=1 SV=1	7.29466	7.34284	7.4828	7.69516	8.25274	7.72412	7.25488	7.27432	-0.172647
810	TRUE	Q9Y639|NPTN_HUMAN	0.79	2.51	1	1		Neuroplastin OS=Homo sapiens OX=9606 GN=NPTN PE=1 SV=2	4.24713	2.25594	4.52485	3.59188	5.97604	3.20673	2.69992	3.41781	-0.170174
354	TRUE	P51148|RAB5C_HUMAN	9.07	27.31	7	4	Oxidation (M)	Ras-related protein Rab-5C OS=Homo sapiens OX=9606 GN=RAB5C PE=1 SV=2	9.02138	8.996	10.2295	10.1838	10.2733	10.4508	9.12995	9.23878	-0.165525
1517	TRUE	O75695|XRP2_HUMAN	10.61	2.86	1	1		Protein XRP2 OS=Homo sapiens OX=9606 GN=RP2 PE=1 SV=4	6.32906	6.22807	6.29967	6.23523	7.12873	7.64731	5.12203	5.83299	-0.159758
471	TRUE	P29966|MARCS_HUMAN	9.72	34.94	7	7		Myristoylated alanine-rich C-kinase substrate OS=Homo sapiens OX=9606 GN=MARCKS PE=1 SV=4	7.44163	7.15081	7.40061	7.24398	8.57952	8.47108	6.67768	6.14667	-0.159483
336	TRUE	P27105|STOM_HUMAN	8.92	52.43	9	9	Carbamidomethylation;Oxidation (M)	Stomatin OS=Homo sapiens OX=9606 GN=STOM PE=1 SV=3	11.999	11.8709	11.917	12.0601	13.3633	13.176	11.0125	10.9213	-0.156509
1184	TRUE	P18510|IL1RA_HUMAN	63.85	10.73	1	1		Interleukin-1 receptor antagonist protein OS=Homo sapiens OX=9606 GN=IL1RN PE=1 SV=1	2.73597	2.97236	3.26991	3.74405	3.49343	3.24388	3.43492	3.16838	-0.154579
883	TRUE	P61769|B2MG_HUMAN	8.12	16.81	2	2		Beta-2-microglobulin OS=Homo sapiens OX=9606 GN=B2M PE=1 SV=1	10.0444	9.79207	10.9909	11.3266	11.2984	11.498	10.0212	9.9523	-0.154013
795	TRUE	P07948|LYN_HUMAN	10.97	6.25	3	3		Tyrosine-protein kinase Lyn OS=Homo sapiens OX=9606 GN=LYN PE=1 SV=3	5.61368	5.90445	6.56179	6.43392	6.68349	6.84074	5.247	6.35526	-0.153162
1310	TRUE	P01763|HV348_HUMAN	11.2	16.24	1	1		Immunoglobulin heavy variable 3-48 OS=Homo sapiens OX=9606 GN=IGHV3-48 PE=1 SV=2	4.43934	3.85844	3.59791	3.60269	3.78366	3.79698	3.67459	4.83812	-0.148746
762	TRUE	P67870|CSK2B_HUMAN	7.06	6.51	1	1		Casein kinase II subunit beta OS=Homo sapiens OX=9606 GN=CSNK2B PE=1 SV=1	4.2581	3.29328	4.22214	4.33584	3.9713	3.95587	4.58175	4.19378	-0.148335
173	TRUE	O75146|HIP1R_HUMAN	54.07	1.5	1	1		Huntingtin-interacting protein 1-related protein OS=Homo sapiens OX=9606 GN=HIP1R PE=1 SV=2	3.48878	3.13477	3.19436	2.96027	2.41653	3.76393	3.23343	3.95741	-0.148282
690	TRUE	O75083|WDR1_HUMAN	13.12	8.58	3	3		WD repeat-containing protein 1 OS=Homo sapiens OX=9606 GN=WDR1 PE=1 SV=4	6.28923	6.41746	6.10855	6.01143	6.18196	5.87618	6.71375	6.63724	-0.145612
1074	TRUE	Q08334|I10R2_HUMAN	11.42	3.69	1	1		Interleukin-10 receptor subunit beta OS=Homo sapiens OX=9606 GN=IL10RB PE=1 SV=2	4.2892	4.24364	4.87233	4.69849	4.86094	5.70954	4.01491	4.04411	-0.13146
1	TRUE	Q15149|PLEC_HUMAN	6.18	6.55	36	26	Acetylation (N-term)	Plectin OS=Homo sapiens OX=9606 GN=PLEC PE=1 SV=3	10.9104	10.8443	8.66266	8.3933	10.6996	10.8849	8.82536	8.89242	-0.122886
1260	TRUE	O75712|CXB3_HUMAN	3.96	9.63	2	2		Gap junction beta-3 protein OS=Homo sapiens OX=9606 GN=GJB3 PE=1 SV=1	7.92605	5.73834	7.33364	6.851	8.83845	8.81008	5.22125	5.4656	-0.121586
514	TRUE	P20340|RAB6A_HUMAN	9.38	23.56	4	4	Oxidation (M)	Ras-related protein Rab-6A OS=Homo sapiens OX=9606 GN=RAB6A PE=1 SV=3	7.37942	8.04139	8.4901	8.96502	8.46787	8.66639	7.895	8.30308	-0.114105
239	TRUE	Q16625|OCLN_HUMAN	6.56	19.73	8	8	Oxidation (M)	Occludin OS=Homo sapiens OX=9606 GN=OCLN PE=1 SV=1	8.03745	8.59579	9.32843	9.55337	9.87445	9.90057	8.607	7.57214	-0.10978
1310	TRUE	P01764|HV323_HUMAN	11.2	16.24	1	1		Immunoglobulin heavy variable 3-23 OS=Homo sapiens OX=9606 GN=IGHV3-23 PE=1 SV=2	4.60243	3.85844	3.59791	3.60269	3.78366	3.79698	3.67459	4.83812	-0.107971
258	TRUE	P38606|VATA_HUMAN	10.1	6.32	3	3		V-type proton ATPase catalytic subunit A OS=Homo sapiens OX=9606 GN=ATP6V1A PE=1 SV=2	6.04431	6.00028	6.4887	6.92115	6.72068	5.945	6.4782	6.73259	-0.105507
582	TRUE	Q9ULV4|COR1C_HUMAN	8.39	7.59	2	2		Coronin-1C OS=Homo sapiens OX=9606 GN=CORO1C PE=1 SV=1	5.62837	6.87695	6.98657	6.5707	6.19949	6.6044	6.72102	6.94725	-0.102394
139	TRUE	P27816|MAP4_HUMAN	2.75	1.13	1	1		Microtubule-associated protein 4 OS=Homo sapiens OX=9606 GN=MAP4 PE=1 SV=3	4.96168	4.37001	7.05391	7.37325	6.34209	5.74048	8.24728	3.82359	-0.0986483
88	TRUE	Q14160|SCRIB_HUMAN	14.56	0.61	1	1		Protein scribble homolog OS=Homo sapiens OX=9606 GN=SCRIB PE=1 SV=4	4.47512	4.1437	3.9153	4.64765	5.18579	4.96239	3.71105	3.63908	-0.0791339
726	TRUE	Q13433|S39A6_HUMAN	4.06	3.97	3	3		Zinc transporter ZIP6 OS=Homo sapiens OX=9606 GN=SLC39A6 PE=1 SV=3	5.86699	6.12836	8.0884	7.7995	8.16029	8.45915	5.68167	5.88306	-0.0752292
807	TRUE	Q9Y4G6|TLN2_HUMAN	2.31	0.35	1	1		Talin-2 OS=Homo sapiens OX=9606 GN=TLN2 PE=1 SV=4	5.38502	3.96024	7.9949	7.17392	5.51707	4.09489	7.72105	7.46446	-0.0708475
255	TRUE	O43491|E41L2_HUMAN	15.25	3.88	3	3		Band 4.1-like protein 2 OS=Homo sapiens OX=9606 GN=EPB41L2 PE=1 SV=1	6.12441	6.35929	6.39504	6.73253	6.62003	7.12902	5.97576	6.14751	-0.0652623
129	TRUE	P05141|ADT2_HUMAN	15.91	6.71	2	2		ADP/ATP translocase 2 OS=Homo sapiens OX=9606 GN=SLC25A5 PE=1 SV=7	5.83998	5.83257	4.99091	4.79522	6.52545	5.38198	4.81272	4.97103	-0.0581235
1050	TRUE	Q7Z403|TMC6_HUMAN	4.88	4.47	3	3	Oxidation (M)	Transmembrane channel-like protein 6 OS=Homo sapiens OX=9606 GN=TMC6 PE=1 SV=2	5.15838	6.58	7.34663	7.6449	6.76774	7.87194	6.28871	5.99091	-0.0473506
804	TRUE	P30626|SORCN_HUMAN	8	11.11	2	2		Sorcin OS=Homo sapiens OX=9606 GN=SRI PE=1 SV=1	5.79037	5.96017	5.70348	5.76257	4.97432	5.80801	6.37496	6.23631	-0.0442548
316	TRUE	Q16555|DPYL2_HUMAN	12.87	7.52	3	3	Oxidation (M)	Dihydropyrimidinase-related protein 2 OS=Homo sapiens OX=9606 GN=DPYSL2 PE=1 SV=1	6.27615	6.32426	4.98629	5.61115	6.32775	6.67483	5.40973	4.94844	-0.0407246
446	TRUE	O60443|GSDME_HUMAN	5.55	2.22	1	1		Gasdermin-E OS=Homo sapiens OX=9606 GN=GSDME PE=1 SV=2	4.96839	5.94493	6.66413	6.08386	6.45473	7.35899	5.41289	4.59291	-0.0395534
53	TRUE	Q9Y490|TLN1_HUMAN	3.53	0.55	1	1		Talin-1 OS=Homo sapiens OX=9606 GN=TLN1 PE=1 SV=3	5.53299	3.21637	6.70245	6.81725	6.17146	5.38338	5.3295	5.49337	-0.0271636
94	TRUE	P06576|ATPB_HUMAN	20.14	23.25	8	8	Oxidation (M)	ATP synthase subunit beta, mitochondrial OS=Homo sapiens OX=9606 GN=ATP5F1B PE=1 SV=3	7.77464	7.65314	8.03908	7.54977	8.03593	7.83371	7.63636	7.61336	-0.0256822
286	TRUE	P60903|S10AA_HUMAN	2.59	37.11	3	3	Oxidation (M)	Protein S100-A10 OS=Homo sapiens OX=9606 GN=S100A10 PE=1 SV=2	7.42634	9.31611	11.9936	11.8487	10.1371	10.5796	10.0283	9.92825	-0.0221471
912	TRUE	P43007|SATT_HUMAN	8.9	8.08	3	3		Neutral amino acid transporter A OS=Homo sapiens OX=9606 GN=SLC1A4 PE=1 SV=1	6.95645	7.21517	7.15405	7.1562	7.03718	6.44704	7.47109	7.61412	-0.0218924
1262	TRUE	Q9UPP2|IQEC3_HUMAN	9.65	0.93	1	1	Acetylation (N-term)	IQ motif and SEC7 domain-containing protein 3 OS=Homo sapiens OX=9606 GN=IQSEC3 PE=2 SV=3	10.4726	12.181	11.4653	11.3152	11.6445	11.982	10.8965	10.9912	-0.0200696
522	TRUE	P00749|UROK_HUMAN	2.95	6.26	2	2		Urokinase-type plasminogen activator OS=Homo sapiens OX=9606 GN=PLAU PE=1 SV=2	4.97284	5.39566	7.88248	8.51858	7.09856	7.64871	6.74541	5.33815	-0.0153195
629	TRUE	O60353|FZD6_HUMAN	61.09	1.98	1	1		Frizzled-6 OS=Homo sapiens OX=9606 GN=FZD6 PE=1 SV=2	3.16285	3.37208	3.20707	3.83446	4.49736	4.74219	1.87898	2.51303	-0.0137752
491	TRUE	Q9UKS6|PACN3_HUMAN	8.25	17.69	6	6		Protein kinase C and casein kinase substrate in neurons protein 3 OS=Homo sapiens OX=9606 GN=PACSIN3 PE=1 SV=2	7.93156	8.04421	8.38885	8.44216	9.17796	9.11762	7.28941	7.2226	-0.000202537
1508	TRUE	Q9BV40|VAMP8_HUMAN	9.31	12	1	1		Vesicle-associated membrane protein 8 OS=Homo sapiens OX=9606 GN=VAMP8 PE=1 SV=1	4.77087	4.57772	5.10303	4.6666	5.7181	5.59994	3.6343	4.16197	0.000974953
202	TRUE	Q9UKV3|ACINU_HUMAN	2.17	1.04	1	1	Acetylation (N-term)	Apoptotic chromatin condensation inducer in the nucleus OS=Homo sapiens OX=9606 GN=ACIN1 PE=1 SV=2	9.21998	6.71047	8.71179	9.73115	10.7502	10.5047	8.01474	5.09626	0.00186932
1012	TRUE	Q96QD8|S38A2_HUMAN	6.06	10.47	3	3		Sodium-coupled neutral amino acid transporter 2 OS=Homo sapiens OX=9606 GN=SLC38A2 PE=1 SV=2	8.95729	7.93343	9.05493	9.04443	9.8608	9.78719	7.662	7.65561	0.00612009
496	TRUE	P11413|G6PD_HUMAN	19.13	11.07	4	4		Glucose-6-phosphate 1-dehydrogenase OS=Homo sapiens OX=9606 GN=G6PD PE=1 SV=4	7.06296	6.71971	6.87018	6.87773	7.24052	6.68879	6.90701	6.64727	0.0117433
1234	TRUE	P01859|IGHG2_HUMAN	4.61	4.91	2	1		Immunoglobulin heavy constant gamma 2 OS=Homo sapiens OX=9606 GN=IGHG2 PE=1 SV=2	7.40181	7.43975	6.48361	7.29808	6.64506	5.81997	8.0216	8.07216	0.016121
1464	TRUE	Q6ZUX7|LHPL2_HUMAN	6.47	10.96	1	1		LHFPL tetraspan subfamily member 2 protein OS=Homo sapiens OX=9606 GN=LHFPL2 PE=1 SV=2	4.00599	4.91221	5.54106	5.43769	5.89837	5.43922	4.1042	4.33112	0.0310078
669	TRUE	P09601|HMOX1_HUMAN	4.31	17.36	4	4	Oxidation (M)	Heme oxygenase 1 OS=Homo sapiens OX=9606 GN=HMOX1 PE=1 SV=1	7.2758	6.36655	7.37151	6.72819	5.77001	6.33165	7.73318	7.7655	0.0354288
321	TRUE	Q13618|CUL3_HUMAN	3.7	1.3	1	1		Cullin-3 OS=Homo sapiens OX=9606 GN=CUL3 PE=1 SV=2	4.1981	3.04061	3.4302	3.66574	3.22826	4.06765	3.64842	3.21265	0.0444192
273	TRUE	Q96TA1|NIBA2_HUMAN	27.14	9.25	5	5	Oxidation (M)	Protein Niban 2 OS=Homo sapiens OX=9606 GN=NIBAN2 PE=1 SV=3	7.60567	7.60592	7.23127	7.63853	7.95497	7.79515	6.99911	7.09332	0.0597103
1442	TRUE	O43657|TSN6_HUMAN	6.82	5.31	1	1		Tetraspanin-6 OS=Homo sapiens OX=9606 GN=TSPAN6 PE=1 SV=1	5.85348	7.20883	6.91933	6.89697	7.46658	7.38569	6.23291	5.53582	0.0643988
605	TRUE	Q9Y653|AGRG1_HUMAN	0.35	6.64	3	3		Adhesion G-protein coupled receptor G1 OS=Homo sapiens OX=9606 GN=ADGRG1 PE=1 SV=2	3.88877	6.03119	6.73429	6.67714	6.84786	5.96744	5.24382	4.99223	0.0700112
413	TRUE	O75122|CLAP2_HUMAN	17.54	0.7	1	1		CLIP-associating protein 2 OS=Homo sapiens OX=9606 GN=CLASP2 PE=1 SV=3	4.65055	4.30433	4.08365	3.68717	4.07185	4.1836	4.12752	4.01818	0.0811381
791	TRUE	Q7KYR7|BT2A1_HUMAN	11.32	2.09	1	1		Butyrophilin subfamily 2 member A1 OS=Homo sapiens OX=9606 GN=BTN2A1 PE=1 SV=3	4.85186	5.00425	3.79722	4.85341	5.5862	4.34373	4.00064	4.24407	0.0830281
291	TRUE	Q8N4S9|MALD2_HUMAN	7.83	8.24	4	4	Oxidation (M)	MARVEL domain-containing protein 2 OS=Homo sapiens OX=9606 GN=MARVELD2 PE=1 SV=2	6.31853	6.4469	7.18058	7.23541	7.3823	7.32711	6.08095	6.05833	0.0831832
30	TRUE	P49368|TCPG_HUMAN	10.37	11.93	6	6	Oxidation (M)	T-complex protein 1 subunit gamma OS=Homo sapiens OX=9606 GN=CCT3 PE=1 SV=4	7.86567	7.75765	7.99338	8.07953	7.65964	7.70175	7.90637	8.09225	0.0840521
527	TRUE	Q02487|DSC2_HUMAN	4.52	6.33	4	4		Desmocollin-2 OS=Homo sapiens OX=9606 GN=DSC2 PE=1 SV=1	7.80755	7.73292	7.74336	9.71962	7.58361	8.79114	8.09625	8.15861	0.0934608
652	TRUE	Q9UNN8|EPCR_HUMAN	0.56	3.78	1	1		Endothelial protein C receptor OS=Homo sapiens OX=9606 GN=PROCR PE=1 SV=1	3.22716	2.40769	3.33389	4.53665	4.58548	3.87536	2.19335	2.46221	0.0972469
584	TRUE	P62873|GBB1_HUMAN	7.83	18.53	7	4	Acetylation (N-term);Carbamidomethylation	Guanine nucleotide-binding protein G(I)/G(S)/G(T) subunit beta-1 OS=Homo sapiens OX=9606 GN=GNB1 PE=1 SV=3	9.47066	9.51961	9.59695	9.8332	10.805	9.96564	8.5442	8.70142	0.101031
246	TRUE	Q6NSJ5|LRC8E_HUMAN	6.79	1.63	1	1		Volume-regulated anion channel subunit LRRC8E OS=Homo sapiens OX=9606 GN=LRRC8E PE=1 SV=2	2.58022	2.97681	4.43166	4.50515	4.23519	4.00768	3.14981	2.69154	0.102402
1032	TRUE	P11233|RALA_HUMAN	4.74	14.08	2	2		Ras-related protein Ral-A OS=Homo sapiens OX=9606 GN=RALA PE=1 SV=1	7.97107	8.06485	9.61762	9.65557	9.06812	9.10647	8.48783	8.17731	0.117344
927	TRUE	Q92930|RAB8B_HUMAN	10.1	5.8	1	1		Ras-related protein Rab-8B OS=Homo sapiens OX=9606 GN=RAB8B PE=1 SV=2	3.46317	3.46731	3.74838	3.94069	4.08874	3.5378	2.88987	3.5879	0.128812
1108	TRUE	P49773|HINT1_HUMAN	3.57	19.05	1	1	Oxidation (M)	Histidine triad nucleotide-binding protein 1 OS=Homo sapiens OX=9606 GN=HINT1 PE=1 SV=2	2.38838	3.68557	5.35217	4.56387	4.1772	3.54209	3.30314	4.43416	0.133354
1229	TRUE	Q9UP38|FZD1_HUMAN	0.2	2.01	1	1		Frizzled-1 OS=Homo sapiens OX=9606 GN=FZD1 PE=1 SV=2	3.64434	8.9472	3.86084	3.53151	5.71108	5.50257	4.6977	3.51477	0.139441
115	TRUE	Q8IZJ1|UNC5B_HUMAN	5.29	2.43	2	2		Netrin receptor UNC5B OS=Homo sapiens OX=9606 GN=UNC5B PE=1 SV=2	5.19998	4.29662	5.99068	5.98637	5.69153	5.10309	4.90729	5.19959	0.143037
547	TRUE	P01112|RASH_HUMAN	4.97	4.76	6	1		GTPase HRas OS=Homo sapiens OX=9606 GN=HRAS PE=1 SV=1	5.98227	5.64489	5.7894	5.86895	6.55281	7.11298	4.80177	4.22953	0.147106
1137	TRUE	O95171|SCEL_HUMAN	0.87	1.74	1	1		Sciellin OS=Homo sapiens OX=9606 GN=SCEL PE=1 SV=2	4.73201	6.42302	1.08858	3.11191	2.2481	3.09221	4.94367	4.48109	0.147615
878	TRUE	Q99828|CIB1_HUMAN	3.5	15.18	2	2		Calcium and integrin-binding protein 1 OS=Homo sapiens OX=9606 GN=CIB1 PE=1 SV=4	4.73951	4.89608	6.52801	5.34218	6.52161	6.29318	3.6026	4.4974	0.14775
14	TRUE	P07814|SYEP_HUMAN	3.63	2.98	3	3		Bifunctional glutamate/proline--tRNA ligase OS=Homo sapiens OX=9606 GN=EPRS1 PE=1 SV=5	6.06653	5.90297	6.34056	6.65456	5.98209	4.64994	6.8046	6.91676	0.152811
387	TRUE	Q9BTU6|P4K2A_HUMAN	5.75	12.32	5	5		Phosphatidylinositol 4-kinase type 2-alpha OS=Homo sapiens OX=9606 GN=PI4K2A PE=1 SV=1	7.19797	6.4154	7.64115	7.76379	8.16814	7.34651	6.53679	6.34623	0.15516
1445	TRUE	O15162|PLS1_HUMAN	7.17	6.29	1	1		Phospholipid scramblase 1 OS=Homo sapiens OX=9606 GN=PLSCR1 PE=1 SV=1	5.47607	5.65171	6.12614	6.68059	6.50008	5.80503	5.35272	5.65354	0.155787
236	TRUE	P04439|HLAA_HUMAN	5.2	18.36	11	6		HLA class I histocompatibility antigen, A alpha chain OS=Homo sapiens OX=9606 GN=HLA-A PE=1 SV=2	11.6155	11.5215	12.2645	12.3255	12.9609	12.5795	10.7612	10.8002	0.156309
80	TRUE	P07900|HS90A_HUMAN	5.61	11.89	18	7	Oxidation (M)	Heat shock protein HSP 90-alpha OS=Homo sapiens OX=9606 GN=HSP90AA1 PE=1 SV=5	9.01225	8.83979	10.1688	10.1731	9.7385	9.61925	9.1614	9.03615	0.159655
903	TRUE	P07602|SAP_HUMAN	4.06	2.48	1	1		Prosaposin OS=Homo sapiens OX=9606 GN=PSAP PE=1 SV=2	4.70219	5.14148	6.04424	6.0686	6.38173	6.28702	3.92424	4.70578	0.164438
1244	TRUE	P60033|CD81_HUMAN	3.61	8.47	2	2		CD81 antigen OS=Homo sapiens OX=9606 GN=CD81 PE=1 SV=1	9.39954	8.95753	10.9741	10.7469	10.6555	10.5469	8.79323	9.36392	0.179633
320	TRUE	P04899|GNAI2_HUMAN	5.13	21.97	11	6	Oxidation (M)	Guanine nucleotide-binding protein G(i) subunit alpha-2 OS=Homo sapiens OX=9606 GN=GNAI2 PE=1 SV=3	9.17816	9.45154	10.3534	10.2381	10.386	10.4587	8.73536	8.92153	0.179897
620	TRUE	Q93050|VPP1_HUMAN	12.89	6.57	4	4	Oxidation (M)	V-type proton ATPase 116 kDa subunit a1 OS=Homo sapiens OX=9606 GN=ATP6V0A1 PE=1 SV=3	6.90901	7.26156	7.09906	7.49526	7.24871	7.39086	6.73902	6.65717	0.182286
642	TRUE	P62330|ARF6_HUMAN	4.6	26.86	4	4	Oxidation (M)	ADP-ribosylation factor 6 OS=Homo sapiens OX=9606 GN=ARF6 PE=1 SV=2	7.82324	7.93803	7.30311	7.13849	9.06256	7.98776	6.51954	5.87712	0.18897
782	TRUE	Q9P1W3|CSC1_HUMAN	7.75	1.86	4	4	Acetylation (N-term);Oxidation (M)	Calcium permeable stress-gated cation channel 1 OS=Homo sapiens OX=9606 GN=TMEM63C PE=2 SV=1	15.8242	15.8215	14.186	14.236	15.2887	15.3586	14.2825	14.351	0.196703
81	TRUE	P07355|ANXA2_HUMAN	8.57	61.65	25	25	Carbamidomethylation;Oxidation (M)	Annexin A2 OS=Homo sapiens OX=9606 GN=ANXA2 PE=1 SV=2	13.6119	13.7358	13.9711	14.3353	13.7348	13.8021	13.5149	13.7445	0.214452
342	TRUE	P63096|GNAI1_HUMAN	3.77	13.56	9	3		Guanine nucleotide-binding protein G(i) subunit alpha-1 OS=Homo sapiens OX=9606 GN=GNAI1 PE=1 SV=2	7.38371	9.14464	8.70792	8.76587	9.01499	9.53339	7.24072	7.35087	0.215541
700	TRUE	Q08209|PP2BA_HUMAN	2.94	4.41	2	2		Serine/threonine-protein phosphatase 2B catalytic subunit alpha isoform OS=Homo sapiens OX=9606 GN=PPP3CA PE=1 SV=1	5.70162	6.10965	7.97965	7.8624	7.44347	7.43246	5.95502	5.95922	0.215786
562	TRUE	Q96RF0|SNX18_HUMAN	5.01	2.71	1	1		Sorting nexin-18 OS=Homo sapiens OX=9606 GN=SNX18 PE=1 SV=2	4.36274	4.12619	4.61795	4.20136	5.19381	4.92397	3.63299	2.65689	0.225143
84	TRUE	P27824|CALX_HUMAN	17.81	8.78	4	4	Oxidation (M)	Calnexin OS=Homo sapiens OX=9606 GN=CANX PE=1 SV=2	7.63664	7.53059	6.88427	7.37106	7.65131	7.48533	6.80158	6.49546	0.247218
555	TRUE	P62834|RAP1A_HUMAN	3.4	7.07	7	1	Oxidation (M)	Ras-related protein Rap-1A OS=Homo sapiens OX=9606 GN=RAP1A PE=1 SV=1	6.20211	7.21241	6.06579	5.88767	7.86137	6.08116	4.26693	6.15778	0.250189
1138	TRUE	P02679|FIBG_HUMAN	6.11	5.52	2	2		Fibrinogen gamma chain OS=Homo sapiens OX=9606 GN=FGG PE=1 SV=3	4.91116	4.76521	4.97507	4.88914	4.30921	4.34988	4.76311	5.09944	0.254736
894	TRUE	P30825|SL7A1_HUMAN	4.04	4.77	3	2	Oxidation (M)	High affinity cationic amino acid transporter 1 OS=Homo sapiens OX=9606 GN=SLC7A1 PE=1 SV=1	7.1864	6.81807	8.0797	8.00051	8.08057	8.10163	6.19659	6.6761	0.257446
531	TRUE	P55010|IF5_HUMAN	0.82	2.78	1	1		Eukaryotic translation initiation factor 5 OS=Homo sapiens OX=9606 GN=EIF5 PE=1 SV=2	4.65203	3.01458	4.33936	4.16349	3.82341	2.93657	4.22569	4.15326	0.257637
329	TRUE	Q9C0B5|ZDHC5_HUMAN	4.02	7.83	4	4	Oxidation (M)	Palmitoyltransferase ZDHHC5 OS=Homo sapiens OX=9606 GN=ZDHHC5 PE=1 SV=2	6.6452	6.81222	7.1702	7.85542	6.55561	8.0929	6.24624	6.52349	0.266196
1107	TRUE	O95197|RTN3_HUMAN	14.66	1.07	1	1		Reticulon-3 OS=Homo sapiens OX=9606 GN=RTN3 PE=1 SV=2	4.86323	5.06967	4.69796	4.94759	5.18705	4.53512	4.592	4.19177	0.268133
152	TRUE	P43490|NAMPT_HUMAN	3.48	8.35	3	3		Nicotinamide phosphoribosyltransferase OS=Homo sapiens OX=9606 GN=NAMPT PE=1 SV=1	6.37138	6.53134	7.597	7.22239	6.71131	5.80616	7.05087	7.07669	0.269272
1071	TRUE	P14384|CBPM_HUMAN	10.97	2.26	1	1		Carboxypeptidase M OS=Homo sapiens OX=9606 GN=CPM PE=1 SV=2	3.46153	2.91314	3.72744	3.26379	4.2065	3.30564	2.44159	2.32535	0.27171
510	TRUE	O15427|MOT4_HUMAN	3.52	10.97	4	4		Monocarboxylate transporter 4 OS=Homo sapiens OX=9606 GN=SLC16A3 PE=1 SV=1	11.346	11.3552	11.8591	11.9826	12.7796	12.2441	10.2555	10.1507	0.27827
1493	TRUE	P56749|CLD12_HUMAN	2	6.15	1	1		Claudin-12 OS=Homo sapiens OX=9606 GN=CLDN12 PE=1 SV=1	5.88115	5.8212	5.6538	5.81814	7.26469	7.05421	5.06728	2.65701	0.282777
680	TRUE	P0CG48|UBC_HUMAN	11.12	5.84	4	4		Polyubiquitin-C OS=Homo sapiens OX=9606 GN=UBC PE=1 SV=3	12.8333	12.7773	12.1205	12.1215	13.0215	12.6585	11.448	11.5907	0.283492
680	TRUE	P0CG47|UBB_HUMAN	11.12	17.47	4	4		Polyubiquitin-B OS=Homo sapiens OX=9606 GN=UBB PE=1 SV=1	12.8333	12.7773	12.1205	12.1215	13.0215	12.6585	11.448	11.5907	0.283492
680	TRUE	P62979|RS27A_HUMAN	11.12	25.64	4	4		Ubiquitin-40S ribosomal protein S27a OS=Homo sapiens OX=9606 GN=RPS27A PE=1 SV=2	12.8333	12.7773	12.1205	12.1215	13.0215	12.6585	11.448	11.5907	0.283492
680	TRUE	P62987|RL40_HUMAN	11.12	31.25	4	4		Ubiquitin-60S ribosomal protein L40 OS=Homo sapiens OX=9606 GN=UBA52 PE=1 SV=2	12.8333	12.7773	12.1205	12.1215	13.0215	12.6585	11.448	11.5907	0.283492
124	TRUE	Q99959|PKP2_HUMAN	6.29	1.25	1	1		Plakophilin-2 OS=Homo sapiens OX=9606 GN=PKP2 PE=1 SV=2	4.1368	3.91169	4.62601	4.40408	3.93592	4.70667	3.68753	3.57463	0.293456
156	TRUE	Q12965|MYO1E_HUMAN	7.34	1.53	1	1		Unconventional myosin-Ie OS=Homo sapiens OX=9606 GN=MYO1E PE=1 SV=2	3.70249	4.07653	4.02909	4.6337	4.02952	4.15213	3.49737	3.57081	0.297993
394	TRUE	O75044|SRGP2_HUMAN	1.9	3.92	4	4		SLIT-ROBO Rho GTPase-activating protein 2 OS=Homo sapiens OX=9606 GN=SRGAP2 PE=1 SV=3	9.30417	9.39778	6.44546	6.4246	8.13504	8.22887	5.50727	8.49357	0.301815
658	TRUE	Q9H6B4|CLMP_HUMAN	3.31	6.97	1	1		CXADR-like membrane protein OS=Homo sapiens OX=9606 GN=CLMP PE=1 SV=1	6.24622	6.21788	6.05431	3.93217	5.8627	6.18685	4.52111	4.61091	0.317253
1455	TRUE	Q15836|VAMP3_HUMAN	6.22	24	1	1		Vesicle-associated membrane protein 3 OS=Homo sapiens OX=9606 GN=VAMP3 PE=1 SV=3	5.62103	6.75095	6.39351	6.51237	6.51759	6.07311	5.44381	5.96354	0.319956
1455	TRUE	P63027|VAMP2_HUMAN	6.22	20.69	1	1		Vesicle-associated membrane protein 2 OS=Homo sapiens OX=9606 GN=VAMP2 PE=1 SV=3	5.62103	6.75095	6.39351	6.51237	6.51759	6.07311	5.44381	5.96354	0.319956
538	TRUE	P51153|RAB13_HUMAN	6.03	6.9	1	1	Oxidation (M)	Ras-related protein Rab-13 OS=Homo sapiens OX=9606 GN=RAB13 PE=1 SV=1	6.67774	6.87647	6.27969	6.29012	7.58626	6.20435	5.59391	5.435	0.326127
590	TRUE	Q14624|ITIH4_HUMAN	8.49	9.68	7	7	Oxidation (M)	Inter-alpha-trypsin inhibitor heavy chain H4 OS=Homo sapiens OX=9606 GN=ITIH4 PE=1 SV=4	12.6297	12.5581	12.9451	12.9697	12.6787	12.7585	12.1385	12.1726	0.338591
									3.17662	2.33732	3.54018	1.61803	2.81408	1.70589	2.84755	1.94785	0.339198
521	TRUE	Q9NYQ6|CELR1_HUMAN	8.1	0.5	1	1		Cadherin EGF LAG seven-pass G-type receptor 1 OS=Homo sapiens OX=9606 GN=CELSR1 PE=1 SV=1	2.50345	3.35124	4.47908	4.80693	4.0283	3.84972	3.4375	2.45104	0.343538
1574	TRUE	P68402|PA1B2_HUMAN	4.62	8.3	1	1		Platelet-activating factor acetylhydrolase IB subunit alpha2 OS=Homo sapiens OX=9606 GN=PAFAH1B2 PE=1 SV=1	3.85408	4.28785	4.6101	4.88017	4.40333	4.80307	3.46254	3.55433	0.352232
307	TRUE	Q96J02|ITCH_HUMAN	4.72	7.75	7	6		E3 ubiquitin-protein ligase Itchy homolog OS=Homo sapiens OX=9606 GN=ITCH PE=1 SV=2	7.2065	7.36045	6.77599	6.88602	7.69986	7.51122	6.15574	5.4504	0.352935
577	TRUE	Q99805|TM9S2_HUMAN	5.5	6.79	4	4	Oxidation (M)	Transmembrane 9 superfamily member 2 OS=Homo sapiens OX=9606 GN=TM9SF2 PE=1 SV=1	8.2057	9.08969	7.22864	7.25608	8.01531	7.5559	7.33873	7.44678	0.355843
338	TRUE	O14672|ADA10_HUMAN	3.79	12.03	7	7	Oxidation (M)	Disintegrin and metalloproteinase domain-containing protein 10 OS=Homo sapiens OX=9606 GN=ADAM10 PE=1 SV=1	12.5316	12.4528	12.5929	12.6275	13.2321	13.1577	11.1519	11.1925	0.367674
322	TRUE	P08648|ITA5_HUMAN	2.79	18.4	13	13	Oxidation (M)	Integrin alpha-5 OS=Homo sapiens OX=9606 GN=ITGA5 PE=1 SV=2	10.0484	9.90211	10.2324	10.8301	11.3868	10.5386	8.58433	9.01957	0.370946
276	TRUE	P78310|CXAR_HUMAN	4.28	21.64	7	7	Oxidation (M)	Coxsackievirus and adenovirus receptor OS=Homo sapiens OX=9606 GN=CXADR PE=1 SV=1	8.86543	9.02153	8.76769	8.57479	8.8237	9.70459	7.45758	7.73151	0.378013
1408	TRUE	Q96FX8|PERP_HUMAN	1.77	8.81	1	1		p53 apoptosis effector related to PMP-22 OS=Homo sapiens OX=9606 GN=PERP PE=1 SV=1	5.84485	5.86258	5.06551	5.08186	6.33295	7.18038	3.45284	3.369	0.379904
36	TRUE	P35222|CTNB1_HUMAN	2.48	16.39	15	10	Oxidation (M)	Catenin beta-1 OS=Homo sapiens OX=9606 GN=CTNNB1 PE=1 SV=1	8.22453	8.27297	9.06561	9.17242	9.85382	8.91885	7.26955	7.16861	0.381179
105	TRUE	Q00341|VIGLN_HUMAN	10.71	0.87	1	1		Vigilin OS=Homo sapiens OX=9606 GN=HDLBP PE=1 SV=2	2.60905	3.8449	3.02755	3.56513	2.61089	2.1606	3.32708	3.38396	0.391022
109	TRUE	Q8IWT6|LRC8A_HUMAN	2.88	5.31	4	4		Volume-regulated anion channel subunit LRRC8A OS=Homo sapiens OX=9606 GN=LRRC8A PE=1 SV=1	5.82387	5.88547	7.06305	7.17507	6.76458	6.50605	5.52508	5.56462	0.396785
699	TRUE	P20648|ATP4A_HUMAN	2.33	2.71	3	1	Carbamidomethylation	Potassium-transporting ATPase alpha chain 1 OS=Homo sapiens OX=9606 GN=ATP4A PE=2 SV=5	7.95976	8.22901	7.35571	8.46543	7.07042	7.14293	7.25978	8.92636	0.402606
796	TRUE	P26012|ITB8_HUMAN	6.82	4.03	2	2		Integrin beta-8 OS=Homo sapiens OX=9606 GN=ITGB8 PE=1 SV=1	3.93548	3.79835	5.00865	5.56757	5.10459	4.49077	3.80829	3.29171	0.403675
1006	TRUE	P48595|SPB10_HUMAN	4.38	6.55	3	3	Acetylation (N-term)	Serpin B10 OS=Homo sapiens OX=9606 GN=SERPINB10 PE=1 SV=1	10.0598	10.2035	10.1584	10.3897	9.41519	9.80534	9.94955	10.0055	0.408923
132	TRUE	Q9H5V8|CDCP1_HUMAN	2.71	11.36	7	7		CUB domain-containing protein 1 OS=Homo sapiens OX=9606 GN=CDCP1 PE=1 SV=3	8.91779	9.14653	9.87807	9.87508	10.0619	9.82368	8.14055	8.12988	0.415372
812	TRUE	Q99829|CPNE1_HUMAN	6.27	1.68	1	1		Copine-1 OS=Homo sapiens OX=9606 GN=CPNE1 PE=1 SV=1	4.86888	5.1402	4.34892	5.12537	5.11005	4.64487	4.40711	3.6569	0.416112
75	TRUE	O95425|SVIL_HUMAN	1.63	0.81	1	1	Carbamidomethylation	Supervillin OS=Homo sapiens OX=9606 GN=SVIL PE=1 SV=2	8.0629	8.47943	9.71894	9.7188	7.63803	8.24436	9.03979	9.37577	0.420524
317	TRUE	Q9HCK8|CHD8_HUMAN	1.21	0.35	1	1	Acetylation (N-term)	Chromodomain-helicase-DNA-binding protein 8 OS=Homo sapiens OX=9606 GN=CHD8 PE=1 SV=5	6.30599	5.04771	7.25764	7.74609	5.2324	5.35101	6.94206	7.07111	0.440214
707	TRUE	O00161|SNP23_HUMAN	2.87	15.64	3	3	Oxidation (M)	Synaptosomal-associated protein 23 OS=Homo sapiens OX=9606 GN=SNAP23 PE=1 SV=1	7.53933	7.27888	8.19381	8.18068	8.11181	8.1276	6.7261	6.46555	0.440408
1016	TRUE	P14174|MIF_HUMAN	1.94	9.57	1	1	Oxidation (M)	Macrophage migration inhibitory factor OS=Homo sapiens OX=9606 GN=MIF PE=1 SV=4	5.48007	5.35482	4.57968	4.87405	4.43946	3.36275	5.08627	5.61268	0.446865
261	TRUE	P53985|MOT1_HUMAN	1.54	14.6	11	11	Oxidation (M)	Monocarboxylate transporter 1 OS=Homo sapiens OX=9606 GN=SLC16A1 PE=1 SV=3	12.5702	12.7711	13.2451	13.248	13.9802	13.9677	11.091	10.9679	0.456917
324	TRUE	Q13733|AT1A4_HUMAN	3.82	1.46	7	1		Sodium/potassium-transporting ATPase subunit alpha-4 OS=Homo sapiens OX=9606 GN=ATP1A4 PE=1 SV=3	17.4804	17.5386	16.6914	16.0534	16.5895	17.135	16.4667	15.7193	0.46332
367	TRUE	Q14254|FLOT2_HUMAN	1.91	14.25	5	5	Oxidation (M)	Flotillin-2 OS=Homo sapiens OX=9606 GN=FLOT2 PE=1 SV=2	7.56115	7.43011	8.42021	8.89851	8.00253	7.93207	8.04692	6.45321	0.468811
242	TRUE	Q4KMQ2|ANO6_HUMAN	1.81	14.07	9	9	Oxidation (M)	Anoctamin-6 OS=Homo sapiens OX=9606 GN=ANO6 PE=1 SV=2	8.01477	7.95044	8.91413	9.0873	9.17275	8.78479	6.46736	7.66417	0.469394
873	TRUE	P41440|S19A1_HUMAN	1.95	1.86	1	1		Reduced folate transporter OS=Homo sapiens OX=9606 GN=SLC19A1 PE=1 SV=3	4.73266	5.08488	4.41091	4.82595	5.44832	5.65452	2.82457	3.24807	0.469731
874	TRUE	P48067|SC6A9_HUMAN	9.64	1.42	1	1		Sodium- and chloride-dependent glycine transporter 1 OS=Homo sapiens OX=9606 GN=SLC6A9 PE=1 SV=3	4.17965	2.23078	2.56657	2.94501	4.32547	2.99503	2.13525	0.587157	0.469776
1330	TRUE	Q96PV0|SYGP1_HUMAN	0.69	0.82	1	1		Ras/Rap GTPase-activating protein SynGAP OS=Homo sapiens OX=9606 GN=SYNGAP1 PE=1 SV=4	10.0931	6.77501	9.74956	10.7552	5.95257	9.7442	9.58902	10.2002	0.471741
87	TRUE	P05556|ITB1_HUMAN	1.93	20.68	18	18	Oxidation (M)	Integrin beta-1 OS=Homo sapiens OX=9606 GN=ITGB1 PE=1 SV=2	13.4782	13.4559	14.1271	14.1807	14.4798	14.4213	12.2756	12.1749	0.472559
634	TRUE	P07947|YES_HUMAN	1.27	2.03	3	1		Tyrosine-protein kinase Yes OS=Homo sapiens OX=9606 GN=YES1 PE=1 SV=3	3.55343	3.87954	4.16282	4.31274	3.16922	4.80262	2.51003	3.47137	0.488825
99	TRUE	Q9UIQ6|LCAP_HUMAN	2.76	8.2	7	7	Oxidation (M)	Leucyl-cystinyl aminopeptidase OS=Homo sapiens OX=9606 GN=LNPEP PE=1 SV=3	7.74004	8.02616	7.95804	7.88623	8.6414	7.98334	6.61452	6.4108	0.490102
35	TRUE	Q6YHK3|CD109_HUMAN	1.38	28.79	29	29	Carbamidomethylation;Oxidation (M)	CD109 antigen OS=Homo sapiens OX=9606 GN=CD109 PE=1 SV=2	9.98214	10.1695	11.5663	11.5949	11.1257	11.6359	9.2542	9.33577	0.490298
244	TRUE	Q12959|DLG1_HUMAN	2.62	8.96	6	6		Disks large homolog 1 OS=Homo sapiens OX=9606 GN=DLG1 PE=1 SV=2	6.98252	7.36896	6.56493	7.24232	7.48209	7.33403	6.11347	5.25754	0.492899
74	TRUE	P08069|IGF1R_HUMAN	2.24	1.61	2	2		Insulin-like growth factor 1 receptor OS=Homo sapiens OX=9606 GN=IGF1R PE=1 SV=1	6.22865	5.33168	6.40968	6.75258	6.00418	6.52369	4.95073	5.26274	0.495311
1596	TRUE	P48509|CD151_HUMAN	1.07	3.95	1	1		CD151 antigen OS=Homo sapiens OX=9606 GN=CD151 PE=1 SV=3	7.02217	7.12508	7.54792	7.45393	8.51472	8.54334	5.28282	4.80506	0.50079
1524	TRUE	P62166|NCS1_HUMAN	1.57	6.84	1	1		Neuronal calcium sensor 1 OS=Homo sapiens OX=9606 GN=NCS1 PE=1 SV=2	4.83647	5.14624	5.18877	5.37643	5.91735	5.37195	4.50319	2.73103	0.506097
992	TRUE	Q99541|PLIN2_HUMAN	0.77	2.29	1	1		Perilipin-2 OS=Homo sapiens OX=9606 GN=PLIN2 PE=1 SV=2	9.13524	5.87408	6.68491	9.24437	8.38174	9.13632	6.04648	5.34341	0.507666
260	TRUE	P02787|TRFE_HUMAN	3.52	23.64	15	15	Oxidation (M)	Serotransferrin OS=Homo sapiens OX=9606 GN=TF PE=1 SV=3	11.6252	11.5372	12.0364	12.0715	11.908	11.6247	10.9275	10.7445	0.516399
910	TRUE	P21283|VATC1_HUMAN	1.74	4.19	1	1		V-type proton ATPase subunit C 1 OS=Homo sapiens OX=9606 GN=ATP6V1C1 PE=1 SV=4	4.5042	4.58094	5.3338	6.14678	5.20229	5.09098	3.82912	4.3706	0.518182
1301	TRUE	Q04941|PLP2_HUMAN	0.92	8.55	1	1		Proteolipid protein 2 OS=Homo sapiens OX=9606 GN=PLP2 PE=1 SV=1	8.15235	8.2023	9.59464	9.61395	9.25377	9.32521	5.85853	9.01621	0.527378
1492	TRUE	Q9NRY6|PLS3_HUMAN	1.79	6.78	1	1		Phospholipid scramblase 3 OS=Homo sapiens OX=9606 GN=PLSCR3 PE=1 SV=2	5.22347	5.48009	5.51466	6.35232	5.07943	6.31034	4.3593	4.69404	0.531856
									3.14209	3.62388	3.17172	2.11494	2.569	4.65985	1.59672	1.09642	0.532659
416	TRUE	Q16181|SEPT7_HUMAN	2	2.75	1	1		Septin-7 OS=Homo sapiens OX=9606 GN=SEPTIN7 PE=1 SV=2	4.98072	5.19319	5.72116	5.42912	4.88832	4.38372	5.3838	4.53138	0.534241
566	TRUE	Q9UL25|RAB21_HUMAN	1.74	21.33	3	3		Ras-related protein Rab-21 OS=Homo sapiens OX=9606 GN=RAB21 PE=1 SV=3	6.97399	6.99561	7.98126	6.42962	6.80481	7.15484	5.41205	6.8618	0.536745
712	TRUE	P13929|ENOB_HUMAN	1.72	3.23	1	1	Oxidation (M)	Beta-enolase OS=Homo sapiens OX=9606 GN=ENO3 PE=1 SV=5	5.57398	5.9415	6.64316	5.77309	4.90325	5.7542	5.67338	5.40067	0.550057
714	TRUE	P50443|S26A2_HUMAN	4.04	2.71	1	1		Sulfate transporter OS=Homo sapiens OX=9606 GN=SLC26A2 PE=1 SV=2	4.50367	4.37285	4.53173	4.50575	4.25424	4.55397	3.49824	3.39238	0.553796
542	TRUE	Q9ULF5|S39AA_HUMAN	0.91	9.75	4	4		Zinc transporter ZIP10 OS=Homo sapiens OX=9606 GN=SLC39A10 PE=1 SV=2	8.92211	8.73996	10.1997	10.3375	9.87409	10.1984	7.96713	7.84764	0.578001
110	TRUE	P23396|RS3_HUMAN	1.62	34.98	6	6	Oxidation (M)	40S ribosomal protein S3 OS=Homo sapiens OX=9606 GN=RPS3 PE=1 SV=2	9.2535	9.28834	10.0212	9.98331	8.93737	9.16684	9.09462	8.99063	0.589215
62	TRUE	Q9UIW2|PLXA1_HUMAN	2.53	7.44	20	11	Oxidation (M)	Plexin-A1 OS=Homo sapiens OX=9606 GN=PLXNA1 PE=1 SV=3	9.56936	9.26959	8.61672	8.83989	8.76041	9.3892	7.83954	7.9275	0.59473
326	TRUE	P98172|EFNB1_HUMAN	0.68	12.14	3	3		Ephrin-B1 OS=Homo sapiens OX=9606 GN=EFNB1 PE=1 SV=1	8.22081	8.17926	9.06893	8.79814	9.50479	9.58998	6.92315	5.86994	0.594817
76	TRUE	P14625|ENPL_HUMAN	1.34	9.22	7	6		Endoplasmin OS=Homo sapiens OX=9606 GN=HSP90B1 PE=1 SV=1	6.62667	6.29885	7.45172	7.51197	6.60653	6.73519	6.02142	6.12364	0.600605
401	TRUE	Q16658|FSCN1_HUMAN	1.6	13.79	6	6		Fascin OS=Homo sapiens OX=9606 GN=FSCN1 PE=1 SV=3	7.84616	8.12263	7.98238	8.21084	7.98137	8.44818	6.69657	6.61334	0.605635
423	TRUE	Q92597|NDRG1_HUMAN	0.74	22.34	6	6	Oxidation (M)	Protein NDRG1 OS=Homo sapiens OX=9606 GN=NDRG1 PE=1 SV=1	9.19842	9.00243	10.7859	10.7695	9.95752	9.99814	8.60005	8.71861	0.620474
997	TRUE	Q99653|CHP1_HUMAN	1.33	5.64	1	1		Calcineurin B homologous protein 1 OS=Homo sapiens OX=9606 GN=CHP1 PE=1 SV=3	3.94832	4.01156	4.12205	4.86114	3.62862	3.76689	3.14627	3.90395	0.624335
777	TRUE	P25445|TNR6_HUMAN	0.86	8.96	3	3		Tumor necrosis factor receptor superfamily member 6 OS=Homo sapiens OX=9606 GN=FAS PE=1 SV=1	5.72977	5.59939	5.94378	5.5374	3.97877	5.67991	5.31924	5.31312	0.629828
1080	TRUE	P0C0L4|CO4A_HUMAN	0.4	1.55	2	2		Complement C4-A OS=Homo sapiens OX=9606 GN=C4A PE=1 SV=2	4.0025	5.22981	7.64652	7.77044	6.21795	5.70622	5.08231	5.11312	0.632415
308	TRUE	O60603|TLR2_HUMAN	1.72	2.93	2	2	Oxidation (M)	Toll-like receptor 2 OS=Homo sapiens OX=9606 GN=TLR2 PE=1 SV=1	6.22325	6.23519	5.47822	6.59967	5.77793	5.97982	5.21624	5.00245	0.639975
301	TRUE	P42892|ECE1_HUMAN	1.73	6.49	3	3	Oxidation (M)	Endothelin-converting enzyme 1 OS=Homo sapiens OX=9606 GN=ECE1 PE=1 SV=2	6.72318	6.75404	7.06032	7.1229	6.77271	6.6751	5.64975	5.99928	0.640901
1523	TRUE	Q86VE9|SERC5_HUMAN	0.65	2.36	1	1		Serine incorporator 5 OS=Homo sapiens OX=9606 GN=SERINC5 PE=2 SV=1	6.222	6.13582	4.90964	5.74471	6.44289	6.35038	4.15313	3.49667	0.642273
197	TRUE	P46531|NOTC1_HUMAN	0.45	1.84	3	3	Oxidation (M)	Neurogenic locus notch homolog protein 1 OS=Homo sapiens OX=9606 GN=NOTCH1 PE=1 SV=4	6.68356	7.4644	9.55476	9.53507	8.08245	8.23595	7.15072	7.19504	0.643407
1362	TRUE	P12259|FA5_HUMAN	7.39	0.58	1	1		Coagulation factor V OS=Homo sapiens OX=9606 GN=F5 PE=1 SV=4	2.86636	3.85487	3.81462	3.99708	3.59614	3.51926	2.37692	2.45334	0.646814
13	TRUE	P21333|FLNA_HUMAN	0.71	12.35	25	23	Oxidation (M)	Filamin-A OS=Homo sapiens OX=9606 GN=FLNA PE=1 SV=4	7.80443	9.21985	8.44468	7.86169	6.91056	7.83622	7.88797	8.09148	0.651107
737	TRUE	P11277|SPTB1_HUMAN	2.99	0.42	1	1		Spectrin beta chain, erythrocytic OS=Homo sapiens OX=9606 GN=SPTB PE=1 SV=5	12.5831	12.5327	11.7249	12.1645	11.7986	12.039	11.206	11.3137	0.662001
397	TRUE	O95297|MPZL1_HUMAN	0.45	27.14	9	9		Myelin protein zero-like protein 1 OS=Homo sapiens OX=9606 GN=MPZL1 PE=1 SV=1	10.83	10.7595	11.7785	11.808	11.888	11.889	8.87262	9.87802	0.662097
749	TRUE	P15529|MCP_HUMAN	0.34	5.61	3	3		Membrane cofactor protein OS=Homo sapiens OX=9606 GN=CD46 PE=1 SV=3	8.59767	8.32413	9.12204	8.9905	9.39151	9.247	6.9026	6.72087	0.693094
662	TRUE	Q9Y289|SC5A6_HUMAN	0.44	1.73	1	1	Oxidation (M)	Sodium-dependent multivitamin transporter OS=Homo sapiens OX=9606 GN=SLC5A6 PE=2 SV=2	6.62407	6.50635	7.02791	6.67491	6.97742	6.92542	5.17006	4.95878	0.700391
259	TRUE	P63244|RACK1_HUMAN	0.39	16.4	4	4	Oxidation (M)	Receptor of activated protein C kinase 1 OS=Homo sapiens OX=9606 GN=RACK1 PE=1 SV=3	8.143	7.4081	8.27097	8.11359	6.98999	6.79213	7.57239	7.77938	0.700442
432	TRUE	Q969P0|IGSF8_HUMAN	0.36	21.53	9	9	Oxidation (M)	Immunoglobulin superfamily member 8 OS=Homo sapiens OX=9606 GN=IGSF8 PE=1 SV=1	10.4292	10.6995	10.7526	11.2691	10.7916	11.1481	8.9643	9.41588	0.707655
344	TRUE	P54709|AT1B3_HUMAN	0.19	30.11	8	8	Oxidation (M)	Sodium/potassium-transporting ATPase subunit beta-3 OS=Homo sapiens OX=9606 GN=ATP1B3 PE=1 SV=1	10.3243	10.2543	11.3727	11.3314	10.9782	10.9989	9.06775	9.34104	0.724206
1343	TRUE	Q9BSK0|MALD1_HUMAN	0.14	5.78	1	1		MARVEL domain-containing protein 1 OS=Homo sapiens OX=9606 GN=MARVELD1 PE=1 SV=1	5.35904	6.58461	6.26851	6.62744	6.9115	6.60039	3.36405	5.06624	0.724353
194	TRUE	Q9NXE4|NSMA3_HUMAN	0.15	1.27	1	1		Sphingomyelin phosphodiesterase 4 OS=Homo sapiens OX=9606 GN=SMPD4 PE=1 SV=3	5.25785	4.72637	6.11919	4.33605	4.92025	5.262	2.61016	4.73872	0.72708
451	TRUE	Q07864|DPOE1_HUMAN	0.42	0.52	1	1	Acetylation (N-term);Oxidation (M)	DNA polymerase epsilon catalytic subunit A OS=Homo sapiens OX=9606 GN=POLE PE=1 SV=5	11.4178	11.372	10.3958	10.3969	10.8107	10.4082	9.63173	9.79603	0.733969
539	TRUE	P20073|ANXA7_HUMAN	0.49	9.63	4	4		Annexin A7 OS=Homo sapiens OX=9606 GN=ANXA7 PE=1 SV=3	8.1798	7.52176	7.45327	7.53778	6.9309	7.47228	6.73494	6.40734	0.786785
693	TRUE	P09497|CLCB_HUMAN	0.45	16.59	4	4		Clathrin light chain B OS=Homo sapiens OX=9606 GN=CLTB PE=1 SV=1	6.55766	6.4182	6.74398	6.17351	5.52525	6.21691	5.67794	5.30368	0.792398
589	TRUE	Q5ZPR3|CD276_HUMAN	0.25	13.11	4	4		CD276 antigen OS=Homo sapiens OX=9606 GN=CD276 PE=1 SV=1	9.54965	9.42688	10.0878	9.89223	10.1039	10.1057	7.75988	7.7966	0.797597
747	TRUE	P62070|RRAS2_HUMAN	0.23	12.75	3	2		Ras-related protein R-Ras2 OS=Homo sapiens OX=9606 GN=RRAS2 PE=1 SV=1	7.15483	6.2315	6.2388	5.77699	7.20876	6.37668	4.68988	3.932	0.798697
179	TRUE	Q15046|SYK_HUMAN	0.76	5.7	3	3	Oxidation (M)	Lysine--tRNA ligase OS=Homo sapiens OX=9606 GN=KARS1 PE=1 SV=3	7.25915	7.03329	7.28841	7.3796	6.76199	6.26107	6.15214	6.55195	0.808326
24	TRUE	Q9UPN3|MACF1_HUMAN	2.06	0.22	1	1		Microtubule-actin cross-linking factor 1, isoforms 1/2/3/5 OS=Homo sapiens OX=9606 GN=MACF1 PE=1 SV=4	5.95038	5.84392	3.66839	3.3747	4.77292	5.20934	4.23246	1.35368	0.817248
651	TRUE	P54707|AT12A_HUMAN	0.16	1.44	3	1		Potassium-transporting ATPase alpha chain 2 OS=Homo sapiens OX=9606 GN=ATP12A PE=1 SV=3	6.51443	3.73445	7.3141	7.02425	3.84375	4.03215	6.66118	6.766	0.821038
102	TRUE	P06756|ITAV_HUMAN	0.35	20.32	18	18	Oxidation (M)	Integrin alpha-V OS=Homo sapiens OX=9606 GN=ITGAV PE=1 SV=2	10.4986	10.5938	11.9845	12.028	11.6102	11.399	9.48103	9.30417	0.827624
									2.60242	2.85832	2.95295	4.09712	2.70988	2.72192	1.89397	1.84728	0.834443
1419	TRUE	P01876|IGHA1_HUMAN	0.45	4.25	1	1		Immunoglobulin heavy constant alpha 1 OS=Homo sapiens OX=9606 GN=IGHA1 PE=1 SV=2	8.21611	7.4014	5.30044	5.67348	7.19346	5.1404	5.12389	5.7527	0.845248
723	TRUE	Q08357|S20A2_HUMAN	0.84	1.53	1	1		Sodium-dependent phosphate transporter 2 OS=Homo sapiens OX=9606 GN=SLC20A2 PE=1 SV=1	4.28668	4.53337	4.89126	5.19869	3.9842	4.49803	3.80971	3.23421	0.845961
									2.15355	3.38616	4.76359	4.11255	3.5585	3.0475	1.97062	2.40861	0.857654
872	TRUE	O43865|SAHH2_HUMAN	0.67	2.26	1	1		S-adenosylhomocysteine hydrolase-like protein 1 OS=Homo sapiens OX=9606 GN=AHCYL1 PE=1 SV=2	5.32127	5.50485	5.28634	5.65055	4.95222	3.34661	4.61463	5.40874	0.8602
916	TRUE	Q9HCL2|GPAT1_HUMAN	0.99	1.45	1	1	Carbamidomethylation	Glycerol-3-phosphate acyltransferase 1, mitochondrial OS=Homo sapiens OX=9606 GN=GPAM PE=1 SV=3	11.9473	12.2021	10.4753	10.8518	11.6347	11.0899	9.5449	9.7019	0.876274
1373	TRUE	P01034|CYTC_HUMAN	2.44	7.53	1	1		Cystatin-C OS=Homo sapiens OX=9606 GN=CST3 PE=1 SV=1	4.98338	5.08558	6.53667	6.18662	4.18891	2.91208	6.00536	6.17479	0.877777
15	TRUE	P49327|FAS_HUMAN	1.23	12.58	23	23	Oxidation (M)	Fatty acid synthase OS=Homo sapiens OX=9606 GN=FASN PE=1 SV=3	9.19093	9.26602	9.93349	9.62864	8.44948	9.41601	8.26156	8.36026	0.882941
922	TRUE	Q9H2H9|S38A1_HUMAN	0.71	6.57	3	3		Sodium-coupled neutral amino acid transporter 1 OS=Homo sapiens OX=9606 GN=SLC38A1 PE=1 SV=1	9.04475	9.36484	9.37925	9.36889	9.77279	9.74166	7.07756	7.0315	0.883553
746	TRUE	Q5VZ89|DEN4C_HUMAN	0.79	0.47	1	1		DENN domain-containing protein 4C OS=Homo sapiens OX=9606 GN=DENND4C PE=1 SV=3	7.70013	8.43282	6.5314	6.64435	7.33551	7.80639	5.22817	5.38279	0.88896
243	TRUE	Q9UJZ1|STML2_HUMAN	0.92	7.3	2	2		Stomatin-like protein 2, mitochondrial OS=Homo sapiens OX=9606 GN=STOML2 PE=1 SV=1	6.06546	5.20904	7.21821	5.56862	5.2485	5.27939	4.88087	5.09111	0.890365
728	TRUE	Q9UK41|VPS28_HUMAN	1.17	16.74	3	3	Oxidation (M)	Vacuolar protein sorting-associated protein 28 homolog OS=Homo sapiens OX=9606 GN=VPS28 PE=1 SV=1	10.5276	10.6276	10.0294	10.086	10.4462	10.4614	8.20678	8.59101	0.891295
1466	TRUE	Q9HBW0|LPAR2_HUMAN	1.8	2.56	1	1		Lysophosphatidic acid receptor 2 OS=Homo sapiens OX=9606 GN=LPAR2 PE=1 SV=2	4.6899	5.00929	4.81613	5.20625	4.88837	4.51342	3.40399	3.33458	0.895306
50	TRUE	P05023|AT1A1_HUMAN	1.08	27.66	38	25	Carbamidomethylation;Oxidation (M)	Sodium/potassium-transporting ATPase subunit alpha-1 OS=Homo sapiens OX=9606 GN=ATP1A1 PE=1 SV=1	13.1625	13.1508	13.6091	13.6137	13.555	13.4061	11.5144	11.4716	0.897261
892	TRUE	Q92896|GSLG1_HUMAN	0.92	0.85	1	1	Oxidation (M)	Golgi apparatus protein 1 OS=Homo sapiens OX=9606 GN=GLG1 PE=1 SV=2	3.97057	5.26294	5.00133	5.38716	3.42562	4.04144	4.51233	4.04931	0.898323
231	TRUE	Q92797|SYMPK_HUMAN	1.13	1.02	1	1		Symplekin OS=Homo sapiens OX=9606 GN=SYMPK PE=1 SV=2	8.14085	7.85843	7.22751	6.91324	7.55703	7.7791	5.89189	5.29623	0.903945
778	TRUE	P48029|SC6A8_HUMAN	1.04	7.87	4	4		Sodium- and chloride-dependent creatine transporter 1 OS=Homo sapiens OX=9606 GN=SLC6A8 PE=1 SV=1	7.72697	7.90118	8.52685	8.23239	8.02326	8.35888	5.99713	6.39005	0.904518
330	TRUE	P19634|SL9A1_HUMAN	0.86	10.67	7	7	Oxidation (M)	Sodium/hydrogen exchanger 1 OS=Homo sapiens OX=9606 GN=SLC9A1 PE=1 SV=2	8.99582	8.79883	10.5335	10.4208	9.48897	9.38431	7.72654	8.51252	0.90916
1146	TRUE	O94985|CSTN1_HUMAN	2.24	3.36	2	2		Calsyntenin-1 OS=Homo sapiens OX=9606 GN=CLSTN1 PE=1 SV=1	5.78984	5.95629	5.79436	5.6638	5.61813	5.08672	3.79823	5.04035	0.915217
1183	TRUE	P07204|TRBM_HUMAN	1.71	3.48	1	1		Thrombomodulin OS=Homo sapiens OX=9606 GN=THBD PE=1 SV=2	6.15983	6.09832	6.38107	6.58729	6.17591	6.15534	4.72825	4.4773	0.922427
612	TRUE	P30419|NMT1_HUMAN	4.41	2.82	1	1	Oxidation (M)	Glycylpeptide N-tetradecanoyltransferase 1 OS=Homo sapiens OX=9606 GN=NMT1 PE=1 SV=2	8.27426	8.29019	8.27637	8.26272	7.90933	7.77113	6.82497	6.88947	0.92716
761	TRUE	Q12846|STX4_HUMAN	1.06	24.24	6	6		Syntaxin-4 OS=Homo sapiens OX=9606 GN=STX4 PE=1 SV=2	8.07186	7.41494	9.19067	9.34056	8.13758	8.0739	6.9436	7.14164	0.930326
78	TRUE	P02786|TFR1_HUMAN	0.92	25.53	16	16	Oxidation (M)	Transferrin receptor protein 1 OS=Homo sapiens OX=9606 GN=TFRC PE=1 SV=2	9.38322	9.50375	10.8016	10.7097	10.274	10.4046	8.12016	7.83528	0.94106
17	TRUE	Q9NZM1|MYOF_HUMAN	1.38	28.14	46	46	Carbamidomethylation;Oxidation (M)	Myoferlin OS=Homo sapiens OX=9606 GN=MYOF PE=1 SV=1	10.131	10.0061	11.3436	11.4751	10.5416	10.4347	9.08684	9.02985	0.965689
298	TRUE	Q15758|AAAT_HUMAN	1.63	18.67	10	10	Acetylation (N-term);Oxidation (M)	Neutral amino acid transporter B(0) OS=Homo sapiens OX=9606 GN=SLC1A5 PE=1 SV=2	12.1555	12.1515	12.8614	12.9586	12.5385	12.4168	10.614	10.6828	0.968748
572	TRUE	P16422|EPCAM_HUMAN	3.46	19.43	4	4	Oxidation (M)	Epithelial cell adhesion molecule OS=Homo sapiens OX=9606 GN=EPCAM PE=1 SV=2	9.34478	9.87031	9.83448	9.84378	9.23087	9.26376	8.34696	8.15931	0.97311
608	TRUE	P05026|AT1B1_HUMAN	1.28	16.17	4	4	Carbamidomethylation	Sodium/potassium-transporting ATPase subunit beta-1 OS=Homo sapiens OX=9606 GN=ATP1B1 PE=1 SV=1	11.218	10.7562	11.6853	11.4111	11.596	11.5028	9.40986	8.63028	0.982912
766	TRUE	O00220|TR10A_HUMAN	1.81	5.34	2	2	Oxidation (M)	Tumor necrosis factor receptor superfamily member 10A OS=Homo sapiens OX=9606 GN=TNFRSF10A PE=1 SV=3	7.36294	5.9572	7.54524	7.34146	6.80996	6.54121	5.60626	5.29729	0.988032
237	TRUE	Q96J84|KIRR1_HUMAN	2.05	1.45	1	1		Kin of IRRE-like protein 1 OS=Homo sapiens OX=9606 GN=KIRREL1 PE=1 SV=2	5.44891	5.51954	4.71079	5.23372	5.12181	5.45733	3.12648	3.22143	0.996481
1176	TRUE	O75787|RENR_HUMAN	6.49	5.71	2	2		Renin receptor OS=Homo sapiens OX=9606 GN=ATP6AP2 PE=1 SV=2	9.62778	9.65369	9.66313	9.63533	8.91488	9.16294	8.29483	8.21684	0.997612
679	TRUE	Q13444|ADA15_HUMAN	8.68	1.74	1	1		Disintegrin and metalloproteinase domain-containing protein 15 OS=Homo sapiens OX=9606 GN=ADAM15 PE=1 SV=4	6.77995	6.74243	6.41216	6.90551	6.04491	5.97687	5.23301	5.52823	1.01426
54	TRUE	P08238|HS90B_HUMAN	2.5	16.71	22	11	Oxidation (M)	Heat shock protein HSP 90-beta OS=Homo sapiens OX=9606 GN=HSP90AB1 PE=1 SV=4	10.4353	10.4708	11.292	11.4769	10.0193	10.3962	9.64314	9.55552	1.0152
229	TRUE	Q9Y624|JAM1_HUMAN	2.76	28.43	9	9	Oxidation (M)	Junctional adhesion molecule A OS=Homo sapiens OX=9606 GN=F11R PE=1 SV=1	12.8601	12.7842	12.6036	12.5265	10.8867	12.3242	11.7991	11.6656	1.02468
143	TRUE	P13637|AT1A3_HUMAN	4.84	2.27	14	1	Carbamidomethylation	Sodium/potassium-transporting ATPase subunit alpha-3 OS=Homo sapiens OX=9606 GN=ATP1A3 PE=1 SV=3	5.80067	6.13357	5.06883	5.74493	4.51046	5.01611	4.30606	4.8089	1.02662
623	TRUE	Q9H9H4|VP37B_HUMAN	2.16	20	4	4	Oxidation (M)	Vacuolar protein sorting-associated protein 37B OS=Homo sapiens OX=9606 GN=VPS37B PE=1 SV=1	9.39253	9.64438	9.15065	9.18153	9.46793	9.46875	7.00417	7.3157	1.02814
775	TRUE	Q15642|CIP4_HUMAN	5.49	1.66	1	1		Cdc42-interacting protein 4 OS=Homo sapiens OX=9606 GN=TRIP10 PE=1 SV=3	3.04723	9.80431	3.57866	1.60223	4.38302	4.39593	2.49112	2.61446	1.03698
1059	TRUE	Q8WUM9|S20A1_HUMAN	1.1	1.47	1	1		Sodium-dependent phosphate transporter 1 OS=Homo sapiens OX=9606 GN=SLC20A1 PE=1 SV=1	5.12341	3.10851	4.81411	3.35981	3.74177	4.49772	2.1841	1.81627	1.04149
808	TRUE	P63098|CANB1_HUMAN	2.17	14.12	2	2		Calcineurin subunit B type 1 OS=Homo sapiens OX=9606 GN=PPP3R1 PE=1 SV=2	6.19745	5.71976	6.56375	6.69857	6.28998	6.18592	3.97389	4.54279	1.04674
1583	TRUE	Q16563|SYPL1_HUMAN	1.85	4.25	1	1		Synaptophysin-like protein 1 OS=Homo sapiens OX=9606 GN=SYPL1 PE=1 SV=1	6.15574	4.6845	6.14251	6.39165	6.1383	5.33075	3.78012	3.92681	1.04961
659	TRUE	Q01844|EWS_HUMAN	5.11	2.13	1	1		RNA-binding protein EWS OS=Homo sapiens OX=9606 GN=EWSR1 PE=1 SV=1	5.99292	5.68677	5.15125	5.63612	4.6213	5.06894	3.72702	4.82609	1.05593
103	TRUE	P22223|CADH3_HUMAN	1.98	10.01	7	7		Cadherin-3 OS=Homo sapiens OX=9606 GN=CDH3 PE=1 SV=2	7.72919	7.43725	8.79131	8.90106	8.17578	7.8781	6.12511	6.44565	1.05853
1175	TRUE	P32970|CD70_HUMAN	1.4	12.44	2	2		CD70 antigen OS=Homo sapiens OX=9606 GN=CD70 PE=1 SV=2	6.07335	3.49745	6.35254	6.37544	4.31895	4.59444	4.41723	4.7289	1.05981
357	TRUE	O14786|NRP1_HUMAN	1.73	4.66	3	3		Neuropilin-1 OS=Homo sapiens OX=9606 GN=NRP1 PE=1 SV=3	6.94452	5.92672	7.86293	8.0184	6.58828	6.85441	4.71897	6.30859	1.07058
104	TRUE	P33527|MRP1_HUMAN	4.78	23.19	24	24	Oxidation (M)	Multidrug resistance-associated protein 1 OS=Homo sapiens OX=9606 GN=ABCC1 PE=1 SV=3	10.958	11.3024	11.465	11.103	10.7502	10.5997	9.137	10.0339	1.07691
736	TRUE	Q99808|S29A1_HUMAN	1.83	10.96	4	4		Equilibrative nucleoside transporter 1 OS=Homo sapiens OX=9606 GN=SLC29A1 PE=1 SV=3	12.1938	12.0564	9.70732	12.1665	11.3244	9.30806	10.7315	10.4227	1.08435
2	TRUE	Q09666|AHNK_HUMAN	4.6	9.1	36	36	Acetylation (N-term);Oxidation (M)	Neuroblast differentiation-associated protein AHNAK OS=Homo sapiens OX=9606 GN=AHNAK PE=1 SV=2	17.0721	17.0626	17.706	17.6859	16.5193	16.4389	15.925	16.28	1.09087
1215	TRUE	O95832|CLD1_HUMAN	2.07	14.69	2	2	Oxidation (M)	Claudin-1 OS=Homo sapiens OX=9606 GN=CLDN1 PE=1 SV=1	6.27624	6.4682	8.03584	8.0111	6.70126	6.75207	5.46067	5.51354	1.09096
788	TRUE	Q9Y287|ITM2B_HUMAN	1.55	3.76	1	1		Integral membrane protein 2B OS=Homo sapiens OX=9606 GN=ITM2B PE=1 SV=1	6.05421	5.99893	8.24458	7.98319	7.2771	6.50215	5.15514	4.98092	1.0914
978	TRUE	Q9C0H2|TTYH3_HUMAN	1.52	4.59	2	2		Protein tweety homolog 3 OS=Homo sapiens OX=9606 GN=TTYH3 PE=1 SV=3	6.54846	5.86398	5.85367	5.93173	7.26198	2.96026	5.31905	4.22732	1.10731
279	TRUE	P18433|PTPRA_HUMAN	2.2	5.36	4	4		Receptor-type tyrosine-protein phosphatase alpha OS=Homo sapiens OX=9606 GN=PTPRA PE=1 SV=3	6.78539	6.88182	8.5557	8.30249	7.12549	7.1285	5.54952	6.29264	1.10731
607	TRUE	Q8N5I2|ARRD1_HUMAN	3.21	31.64	8	8		Arrestin domain-containing protein 1 OS=Homo sapiens OX=9606 GN=ARRDC1 PE=1 SV=1	11.9586	11.9829	11.3401	11.1171	11.5258	11.6087	9.25396	9.56736	1.11075
4	TRUE	O75369|FLNB_HUMAN	2.81	14.45	30	28	Oxidation (M)	Filamin-B OS=Homo sapiens OX=9606 GN=FLNB PE=1 SV=2	8.73592	8.50554	9.59349	9.2364	7.50024	7.46361	8.19417	8.39159	1.13043
11	TRUE	Q01082|SPTB2_HUMAN	8.15	0.51	1	1	Oxidation (M)	Spectrin beta chain, non-erythrocytic 1 OS=Homo sapiens OX=9606 GN=SPTBN1 PE=1 SV=2	3.69832	3.72466	4.70065	4.26561	1.77587	3.44059	3.0929	3.48424	1.14891
641	TRUE	Q9H4G0|E41L1_HUMAN	2.78	2.27	2	2		Band 4.1-like protein 1 OS=Homo sapiens OX=9606 GN=EPB41L1 PE=1 SV=2	13.1824	13.1363	11.346	11.0846	12.7219	10.5951	10.3867	10.3676	1.1695
564	TRUE	Q9H6X2|ANTR1_HUMAN	3.24	1.77	1	1		Anthrax toxin receptor 1 OS=Homo sapiens OX=9606 GN=ANTXR1 PE=1 SV=2	3.8177	3.64427	4.20719	4.15428	3.1891	3.16762	2.28134	2.49801	1.17185
304	TRUE	Q8WTV0|SCRB1_HUMAN	3.3	11.05	6	6	Oxidation (M)	Scavenger receptor class B member 1 OS=Homo sapiens OX=9606 GN=SCARB1 PE=1 SV=1	10.7532	10.6236	11.091	11.2292	10.9439	10.7321	8.4152	8.91502	1.17267
68	TRUE	P08581|MET_HUMAN	2.88	1.73	2	2		Hepatocyte growth factor receptor OS=Homo sapiens OX=9606 GN=MET PE=1 SV=4	6.34431	6.33019	7.61397	6.93118	6.9291	5.6895	4.1789	5.72066	1.17537
146	TRUE	Q96RT1|ERBIN_HUMAN	52.54	0.85	1	1		Erbin OS=Homo sapiens OX=9606 GN=ERBIN PE=1 SV=2	3.82865	4.41524	2.91419	3.63212	3.75864	2.9342	1.76486	1.58491	1.18689
46	TRUE	P53396|ACLY_HUMAN	5.46	16.17	13	13	Oxidation (M)	ATP-citrate synthase OS=Homo sapiens OX=9606 GN=ACLY PE=1 SV=3	7.97821	8.11576	8.52762	8.95555	8.02247	7.36088	6.74664	6.645	1.20054
181	TRUE	Q08345|DDR1_HUMAN	9.65	0.99	1	1		Epithelial discoidin domain-containing receptor 1 OS=Homo sapiens OX=9606 GN=DDR1 PE=1 SV=1	4.17615	4.62936	2.86161	4.02111	3.94167	3.90698	0.337829	2.65651	1.21131
266	TRUE	Q15582|BGH3_HUMAN	2.99	19.03	9	9	Oxidation (M)	Transforming growth factor-beta-induced protein ig-h3 OS=Homo sapiens OX=9606 GN=TGFBI PE=1 SV=1	8.28384	8.86113	10.1189	10.4106	8.85264	8.44687	7.78365	7.72462	1.21667
473	TRUE	P78536|ADA17_HUMAN	8.14	6.07	4	4	Oxidation (M)	Disintegrin and metalloproteinase domain-containing protein 17 OS=Homo sapiens OX=9606 GN=ADAM17 PE=1 SV=1	8.1553	8.02796	8.40898	8.0243	7.29816	6.61937	7.17358	6.57567	1.23744
468	TRUE	Q99816|TS101_HUMAN	4.36	22.31	7	7	Oxidation (M)	Tumor susceptibility gene 101 protein OS=Homo sapiens OX=9606 GN=TSG101 PE=1 SV=2	9.76103	9.72541	9.21906	9.75365	9.40442	9.50546	6.70902	7.75457	1.27142
									4.0071	2.82217	3.88479	1.92537	1.85269	3.01837	1.05843	1.55521	1.28868
117	TRUE	Q8WUM4|PDC6I_HUMAN	10.46	34.79	27	27	Oxidation (M)	Programmed cell death 6-interacting protein OS=Homo sapiens OX=9606 GN=PDCD6IP PE=1 SV=1	12.5548	12.5689	12.9012	12.7805	11.4642	12.0021	11.1536	10.9607	1.30623
227	TRUE	P50281|MMP14_HUMAN	3.46	14.6	8	8	Oxidation (M)	Matrix metalloproteinase-14 OS=Homo sapiens OX=9606 GN=MMP14 PE=1 SV=3	8.94462	9.71312	9.91869	10.5451	9.07449	10.0314	7.79421	6.88759	1.33346
122	TRUE	P52597|HNRPF_HUMAN	4.66	10.6	3	3		Heterogeneous nuclear ribonucleoprotein F OS=Homo sapiens OX=9606 GN=HNRNPF PE=1 SV=3	8.26804	8.00553	9.11549	9.13159	6.96029	6.77908	7.50774	7.83527	1.35957
427	TRUE	P18564|ITB6_HUMAN	3.51	6.6	5	5		Integrin beta-6 OS=Homo sapiens OX=9606 GN=ITGB6 PE=1 SV=2	9.88473	9.88793	11.3991	11.4291	10.54	10.2305	8.30784	8.08178	1.36019
703	TRUE	P05362|ICAM1_HUMAN	6.85	2.63	1	1		Intercellular adhesion molecule 1 OS=Homo sapiens OX=9606 GN=ICAM1 PE=1 SV=2	3.0897	3.04778	5.43899	5.66409	2.79269	4.54525	1.84544	2.52578	1.38285
443	TRUE	O00186|STXB3_HUMAN	1.24	17.57	9	9	Oxidation (M)	Syntaxin-binding protein 3 OS=Homo sapiens OX=9606 GN=STXBP3 PE=1 SV=2	11.4642	7.69454	12.5768	12.8579	14.3484	8.41525	7.8269	8.46264	1.3851
758	TRUE	Q96RD7|PANX1_HUMAN	6.57	9.15	3	3		Pannexin-1 OS=Homo sapiens OX=9606 GN=PANX1 PE=1 SV=4	7.80042	7.94896	8.80982	8.79514	7.51343	7.69171	6.42654	6.136	1.39667
1081	TRUE	Q5T3F8|CSCL2_HUMAN	3.19	1.08	1	1		CSC1-like protein 2 OS=Homo sapiens OX=9606 GN=TMEM63B PE=1 SV=1	4.22314	3.1585	4.82035	4.92265	3.39716	0.883829	3.48486	3.7121	1.41167
222	TRUE	Q14118|DAG1_HUMAN	7.42	1.23	1	1		Dystroglycan OS=Homo sapiens OX=9606 GN=DAG1 PE=1 SV=2	4.92376	5.22119	5.68879	5.41905	3.40355	3.8564	4.1568	4.09703	1.43475
166	TRUE	P54760|EPHB4_HUMAN	3.88	2.23	4	1	Carbamidomethylation	Ephrin type-B receptor 4 OS=Homo sapiens OX=9606 GN=EPHB4 PE=1 SV=2	5.91345	7.24346	5.31466	8.16683	6.02676	4.45048	5.70082	4.70561	1.43869
91	TRUE	Q13740|CD166_HUMAN	5.4	16.98	8	8	Oxidation (M)	CD166 antigen OS=Homo sapiens OX=9606 GN=ALCAM PE=1 SV=2	9.88932	9.71705	11.0768	11.0253	9.93098	9.71999	8.29415	7.96735	1.449
28	TRUE	Q14517|FAT1_HUMAN	5.32	1.94	7	7	Oxidation (M)	Protocadherin Fat 1 OS=Homo sapiens OX=9606 GN=FAT1 PE=1 SV=2	7.48059	8.19916	6.87888	7.33755	7.75358	6.75776	4.42434	5.11057	1.46248
346	TRUE	Q03135|CAV1_HUMAN	4.52	31.46	4	4		Caveolin-1 OS=Homo sapiens OX=9606 GN=CAV1 PE=1 SV=4	10.7814	11.0995	12.4865	12.5509	10.9469	11.4116	9.41457	9.2679	1.46932
483	TRUE	O00560|SDCB1_HUMAN	6.97	52.01	8	8	Carbamidomethylation;Oxidation (M)	Syntenin-1 OS=Homo sapiens OX=9606 GN=SDCBP PE=1 SV=1	10.9849	10.9248	11.0893	11.102	10.5846	10.7186	8.40991	8.47252	1.47886
393	TRUE	P48960|AGRE5_HUMAN	9.68	8.74	4	4	Oxidation (M)	Adhesion G protein-coupled receptor E5 OS=Homo sapiens OX=9606 GN=ADGRE5 PE=1 SV=4	8.28765	8.32458	9.26604	8.92562	7.5816	7.7566	6.72847	6.75685	1.4951
426	TRUE	Q13641|TPBG_HUMAN	3.95	10.48	3	3	Oxidation (M)	Trophoblast glycoprotein OS=Homo sapiens OX=9606 GN=TPBG PE=1 SV=1	9.60942	9.08484	10.4166	10.592	9.90733	9.77845	6.56947	7.46721	1.49511
1551	TRUE	Q96A54|PAQR1_HUMAN	5.57	3.2	1	1		Adiponectin receptor protein 1 OS=Homo sapiens OX=9606 GN=ADIPOR1 PE=1 SV=1	4.47282	4.1205	6.04053	5.59595	4.09371	4.23226	2.67702	3.2253	1.50038
586	TRUE	Q9UJU6|DBNL_HUMAN	2.41	2.56	1	1		Drebrin-like protein OS=Homo sapiens OX=9606 GN=DBNL PE=1 SV=1	6.16197	5.87074	3.96059	3.49135	2.70033	3.23302	3.69497	3.76101	1.52383
49	TRUE	P17301|ITA2_HUMAN	5.88	28.62	24	24	Acetylation (N-term);Carbamidomethylation;Oxidation (M)	Integrin alpha-2 OS=Homo sapiens OX=9606 GN=ITGA2 PE=1 SV=1	12.7935	13.0883	13.1997	13.007	12.7425	12.0358	11.6907	9.52216	1.52435
753	TRUE	O75131|CPNE3_HUMAN	10.82	5.03	3	3		Copine-3 OS=Homo sapiens OX=9606 GN=CPNE3 PE=1 SV=1	7.25701	7.01968	7.81607	7.66238	6.22253	6.68033	5.19261	5.52582	1.53346
478	TRUE	Q8TD43|TRPM4_HUMAN	10.34	5.77	6	6	Oxidation (M)	Transient receptor potential cation channel subfamily M member 4 OS=Homo sapiens OX=9606 GN=TRPM4 PE=1 SV=1	7.66184	7.59339	8.63643	8.17493	6.942	6.96052	6.00909	6.0181	1.53422
114	TRUE	O95714|HERC2_HUMAN	21.91	0.19	1	1		E3 ubiquitin-protein ligase HERC2 OS=Homo sapiens OX=9606 GN=HERC2 PE=1 SV=2	16.1034	15.9431	15.5302	15.891	14.3371	14.9142	14.1408	13.9035	1.54304
1073	TRUE	Q9Y5Y0|FLVC1_HUMAN	9.03	4.68	2	2		Feline leukemia virus subgroup C receptor-related protein 1 OS=Homo sapiens OX=9606 GN=FLVCR1 PE=1 SV=1	5.64813	5.69258	5.76365	5.64852	4.62165	4.69716	4.53041	2.64843	1.56381
727	TRUE	Q9Y6M5|ZNT1_HUMAN	7.4	12.82	4	4		Zinc transporter 1 OS=Homo sapiens OX=9606 GN=SLC30A1 PE=1 SV=3	9.48824	9.65051	10.5991	10.6639	9.24859	9.3939	7.37181	8.04453	1.58575
1275	TRUE	P06310|KV230_HUMAN	4.6	10.83	1	1		Immunoglobulin kappa variable 2-30 OS=Homo sapiens OX=9606 GN=IGKV2-30 PE=3 SV=2	6.88232	6.61414	5.96216	6.00214	3.8591	7.23205	3.12856	4.73003	1.62776
1275	TRUE	P01615|KVD28_HUMAN	4.6	10.83	1	1		Immunoglobulin kappa variable 2D-28 OS=Homo sapiens OX=9606 GN=IGKV2D-28 PE=1 SV=2	6.88232	6.61414	5.96216	6.00214	3.8591	7.23205	3.12856	4.73003	1.62776
1275	TRUE	A0A087WW87|KV240_HUMAN	4.6	10.74	1	1		Immunoglobulin kappa variable 2-40 OS=Homo sapiens OX=9606 GN=IGKV2-40 PE=3 SV=2	6.88232	6.61414	5.96216	6.00214	3.8591	7.23205	3.12856	4.73003	1.62776
1275	TRUE	A0A075B6P5|KV228_HUMAN	4.6	10.83	1	1		Immunoglobulin kappa variable 2-28 OS=Homo sapiens OX=9606 GN=IGKV2-28 PE=3 SV=1	6.88232	6.61414	5.96216	6.00214	3.8591	7.23205	3.12856	4.73003	1.62776
1275	TRUE	A0A075B6S6|KVD30_HUMAN	4.6	10.83	1	1		Immunoglobulin kappa variable 2D-30 OS=Homo sapiens OX=9606 GN=IGKV2D-30 PE=3 SV=1	6.88232	6.61414	5.96216	6.00214	3.8591	7.23205	3.12856	4.73003	1.62776
1275	TRUE	A2NJV5|KV229_HUMAN	4.6	10.83	1	1		Immunoglobulin kappa variable 2-29 OS=Homo sapiens OX=9606 GN=IGKV2-29 PE=3 SV=2	6.88232	6.61414	5.96216	6.00214	3.8591	7.23205	3.12856	4.73003	1.62776
1275	TRUE	A0A0A0MRZ7|KVD26_HUMAN	4.6	10.83	1	1		Immunoglobulin kappa variable 2D-26 OS=Homo sapiens OX=9606 GN=IGKV2D-26 PE=3 SV=1	6.88232	6.61414	5.96216	6.00214	3.8591	7.23205	3.12856	4.73003	1.62776
1275	TRUE	P01614|KVD40_HUMAN	4.6	10.74	1	1		Immunoglobulin kappa variable 2D-40 OS=Homo sapiens OX=9606 GN=IGKV2D-40 PE=1 SV=2	6.88232	6.61414	5.96216	6.00214	3.8591	7.23205	3.12856	4.73003	1.62776
1275	TRUE	A0A075B6S2|KVD29_HUMAN	4.6	10.83	1	1		Immunoglobulin kappa variable 2D-29 OS=Homo sapiens OX=9606 GN=IGKV2D-29 PE=3 SV=1	6.88232	6.61414	5.96216	6.00214	3.8591	7.23205	3.12856	4.73003	1.62776
113	TRUE	Q9P273|TEN3_HUMAN	15.6	0.44	1	1		Teneurin-3 OS=Homo sapiens OX=9606 GN=TENM3 PE=1 SV=3	5.09713	5.34291	4.8931	5.03535	3.53519	4.48792	2.67785	3.14953	1.6295
710	TRUE	Q9H2J7|S6A15_HUMAN	11.82	5.75	3	3		Sodium-dependent neutral amino acid transporter B(0)AT2 OS=Homo sapiens OX=9606 GN=SLC6A15 PE=1 SV=1	6.2522	6.38119	6.54707	6.61167	5.37083	5.73776	4.42491	3.67645	1.64554
786	TRUE	Q9Y3L5|RAP2C_HUMAN	8.28	6.56	3	1	Oxidation (M)	Ras-related protein Rap-2c OS=Homo sapiens OX=9606 GN=RAP2C PE=1 SV=1	8.50987	8.38798	7.56214	7.67068	7.83796	6.10382	6.7123	4.85974	1.65421
829	TRUE	P51636|CAV2_HUMAN	12.59	26.54	2	2	Oxidation (M)	Caveolin-2 OS=Homo sapiens OX=9606 GN=CAV2 PE=1 SV=2	9.4283	9.25956	8.33689	8.31305	8.02324	8.08446	6.18387	6.2969	1.68733
347	TRUE	O15439|MRP4_HUMAN	11.95	3.7	4	4		Multidrug resistance-associated protein 4 OS=Homo sapiens OX=9606 GN=ABCC4 PE=1 SV=3	6.71058	6.70399	7.27428	7.5514	6.32829	5.59765	5.00729	4.52273	1.69608
1562	TRUE	Q86VH4|LRRT4_HUMAN	9.38	1.86	1	1		Leucine-rich repeat transmembrane neuronal protein 4 OS=Homo sapiens OX=9606 GN=LRRTM4 PE=2 SV=2	6.9772	6.29381	6.32673	6.38427	5.88279	5.9782	3.77581	3.53335	1.70296
289	TRUE	P50570|DYN2_HUMAN	9.29	2.18	1	1		Dynamin-2 OS=Homo sapiens OX=9606 GN=DNM2 PE=1 SV=2	4.87387	4.99792	5.70307	5.77255	3.10678	3.59081	3.72664	4.10276	1.70511
355	TRUE	Q96PD2|DCBD2_HUMAN	8.92	1.55	1	1		Discoidin, CUB and LCCL domain-containing protein 2 OS=Homo sapiens OX=9606 GN=DCBLD2 PE=1 SV=1	5.65913	5.55262	6.10404	5.15291	5.12506	4.78732	3.32183	2.3938	1.71018
130	TRUE	Q12860|CNTN1_HUMAN	8.78	20.43	15	15	Oxidation (M)	Contactin-1 OS=Homo sapiens OX=9606 GN=CNTN1 PE=1 SV=1	7.85534	8.78961	9.3168	9.73798	7.40356	7.83061	6.96375	6.62668	1.71879
121	TRUE	P20020|AT2B1_HUMAN	12.86	10.98	20	10	Oxidation (M)	Plasma membrane calcium-transporting ATPase 1 OS=Homo sapiens OX=9606 GN=ATP2B1 PE=1 SV=4	9.60027	9.59422	10.3422	10.3235	9.23971	8.12853	7.60084	7.92639	1.7412
797	TRUE	P17813|EGLN_HUMAN	6.42	3.34	2	2		Endoglin OS=Homo sapiens OX=9606 GN=ENG PE=1 SV=2	6.12816	6.64867	6.16258	5.34789	6.21967	5.3176	3.33383	2.40073	1.75387
182	TRUE	Q04912|RON_HUMAN	7.59	1.71	2	2		Macrophage-stimulating protein receptor OS=Homo sapiens OX=9606 GN=MST1R PE=1 SV=3	3.94414	5.34538	6.12136	5.26571	3.48333	4.60681	2.65671	2.89984	1.75748
579	TRUE	Q9UHX3|AGRE2_HUMAN	8.53	1.82	1	1	Oxidation (M)	Adhesion G protein-coupled receptor E2 OS=Homo sapiens OX=9606 GN=ADGRE2 PE=1 SV=2	4.78506	5.03509	5.24053	6.22777	5.15787	3.51263	2.49225	3.06596	1.76494
752	TRUE	P15151|PVR_HUMAN	7.29	10.31	3	3	Oxidation (M)	Poliovirus receptor OS=Homo sapiens OX=9606 GN=PVR PE=1 SV=2	9.39974	9.19343	9.9744	9.93543	8.91027	9.32668	6.96484	6.23511	1.76653
384	TRUE	P11166|GTR1_HUMAN	5.13	10.57	7	7	Oxidation (M)	Solute carrier family 2, facilitated glucose transporter member 1 OS=Homo sapiens OX=9606 GN=SLC2A1 PE=1 SV=2	9.82356	9.67768	11.5977	11.4957	10.2613	10.2743	7.41053	7.55217	1.77407
618	TRUE	O75976|CBPD_HUMAN	4.75	0.87	1	1		Carboxypeptidase D OS=Homo sapiens OX=9606 GN=CPD PE=1 SV=2	9.77794	9.69143	7.50119	7.31379	6.86534	6.43361	4.3555	9.01406	1.90396
93	TRUE	P10809|CH60_HUMAN	16.77	11.87	5	5	Oxidation (M)	60 kDa heat shock protein, mitochondrial OS=Homo sapiens OX=9606 GN=HSPD1 PE=1 SV=2	7.69911	7.66127	8.18979	8.04402	6.31461	5.50099	6.2135	5.93234	1.90819
153	TRUE	P98160|PGBM_HUMAN	9.92	5.4	18	18	Oxidation (M)	Basement membrane-specific heparan sulfate proteoglycan core protein OS=Homo sapiens OX=9606 GN=HSPG2 PE=1 SV=4	8.2161	8.03233	9.72506	9.71516	7.35249	7.11834	6.90954	6.64095	1.91683
1444	TRUE	P43003|EAA1_HUMAN	1.99	2.21	1	1		Excitatory amino acid transporter 1 OS=Homo sapiens OX=9606 GN=SLC1A3 PE=1 SV=1	3.69344	4.33227	5.36735	4.85522	3.83088	3.62285	1.13192	1.95124	1.92785
814	TRUE	P58335|ANTR2_HUMAN	13.87	2.86	1	1		Anthrax toxin receptor 2 OS=Homo sapiens OX=9606 GN=ANTXR2 PE=1 SV=5	6.004	5.6418	2.63456	2.99751	3.13566	1.45302	3.24716	1.67144	1.94265
1205	TRUE	Q15043|S39AE_HUMAN	17.25	2.64	1	1		Metal cation symporter ZIP14 OS=Homo sapiens OX=9606 GN=SLC39A14 PE=1 SV=3	8.57963	7.94381	8.8295	8.78261	6.8075	7.37716	6.04625	6.0773	1.95683
18	TRUE	Q00610|CLH1_HUMAN	18.48	29.61	46	35	Carbamidomethylation;Oxidation (M)	Clathrin heavy chain 1 OS=Homo sapiens OX=9606 GN=CLTC PE=1 SV=5	11.7833	11.6614	12.2574	12.5632	10.1995	10.455	9.84969	9.90781	1.96331
262	TRUE	O00468|AGRIN_HUMAN	17.38	8.8	13	13		Agrin OS=Homo sapiens OX=9606 GN=AGRN PE=1 SV=6	10.3139	10.3656	10.3474	10.3943	9.18129	9.24287	7.12072	7.96659	1.97743
615	TRUE	O14763|TR10B_HUMAN	11.73	11.59	4	4	Oxidation (M)	Tumor necrosis factor receptor superfamily member 10B OS=Homo sapiens OX=9606 GN=TNFRSF10B PE=1 SV=2	8.17671	7.64711	8.67383	8.90246	7.53023	6.91948	5.8656	5.08695	1.99946
375	TRUE	P31939|PUR9_HUMAN	7.98	7.43	3	3		Bifunctional purine biosynthesis protein ATIC OS=Homo sapiens OX=9606 GN=ATIC PE=1 SV=3	10.7038	7.14337	7.88491	8.38186	6.92599	5.87046	6.68098	6.5412	2.02383
849	TRUE	P62879|GBB2_HUMAN	5.4	5.59	4	1	Carbamidomethylation	Guanine nucleotide-binding protein G(I)/G(S)/G(T) subunit beta-2 OS=Homo sapiens OX=9606 GN=GNB2 PE=1 SV=3	8.04313	7.98644	3.67088	3.70537	4.17979	4.28095	3.17586	3.52356	2.06141
770	TRUE	P05121|PAI1_HUMAN	34.27	12.94	4	4	Oxidation (M)	Plasminogen activator inhibitor 1 OS=Homo sapiens OX=9606 GN=SERPINE1 PE=1 SV=1	8.04017	7.48871	7.23917	7.46818	6.25708	5.73202	4.97988	4.93323	2.08351
168	TRUE	P21589|5NTD_HUMAN	14.28	23	10	10	Oxidation (M)	5'-nucleotidase OS=Homo sapiens OX=9606 GN=NT5E PE=1 SV=1	8.92198	9.37114	10.2097	10.1789	8.37247	8.12004	7.00649	6.51232	2.16761
1346	TRUE	P15104|GLNA_HUMAN	5.27	5.36	1	1		Glutamine synthetase OS=Homo sapiens OX=9606 GN=GLUL PE=1 SV=4	5.14745	9.0973	6.47594	8.71818	4.21654	3.95528	6.15746	6.35758	2.188
1083	TRUE	P09496|CLCA_HUMAN	38.97	11.69	2	2		Clathrin light chain A OS=Homo sapiens OX=9606 GN=CLTA PE=1 SV=1	7.52915	8.14652	7.24191	7.60103	6.00333	5.50042	5.0051	4.90414	2.2764
648	TRUE	O43570|CAH12_HUMAN	19.11	19.21	5	5	Oxidation (M)	Carbonic anhydrase 12 OS=Homo sapiens OX=9606 GN=CA12 PE=1 SV=1	8.11939	9.83281	9.44989	9.34281	7.20003	7.0429	6.54035	6.70446	2.31429
167	TRUE	P13010|XRCC5_HUMAN	10.27	3.01	2	2		X-ray repair cross-complementing protein 5 OS=Homo sapiens OX=9606 GN=XRCC5 PE=1 SV=3	6.05683	5.18656	6.17495	6.02124	1.97736	3.87667	4.04008	4.27009	2.31884
1450	TRUE	Q7L0Q8|RHOU_HUMAN	9.33	4.65	1	1		Rho-related GTP-binding protein RhoU OS=Homo sapiens OX=9606 GN=RHOU PE=1 SV=1	7.05744	7.12983	8.02272	8.00819	5.62086	3.20874	5.98802	6.00069	2.34997
960	TRUE	P20645|MPRD_HUMAN	4.01	7.58	2	2	Carbamidomethylation	Cation-dependent mannose-6-phosphate receptor OS=Homo sapiens OX=9606 GN=M6PR PE=1 SV=1	12.51	12.3779	6.85847	6.28775	8.93655	8.8942	5.19649	5.46258	2.38609
1068	TRUE	Q9BXS9|S26A6_HUMAN	7.63	4.35	2	2	Oxidation (M)	Solute carrier family 26 member 6 OS=Homo sapiens OX=9606 GN=SLC26A6 PE=1 SV=1	4.33214	5.52138	6.51683	6.6212	3.92694	4.53019	1.80259	2.88761	2.46105
1025	TRUE	P00918|CAH2_HUMAN	7.05	5	1	1		Carbonic anhydrase 2 OS=Homo sapiens OX=9606 GN=CA2 PE=1 SV=2	7.52685	3.75021	6.11795	6.4061	3.18289	2.7589	3.46481	4.05961	2.58372
39	TRUE	P08670|VIME_HUMAN	16.18	18.45	11	7	Oxidation (M)	Vimentin OS=Homo sapiens OX=9606 GN=VIM PE=1 SV=4	7.00708	6.77941	6.94623	7.63379	4.21293	3.04537	5.04318	5.00471	2.76508
219	TRUE	Q9Y6M7|S4A7_HUMAN	5.43	7	7	7	Oxidation (M)	Sodium bicarbonate cotransporter 3 OS=Homo sapiens OX=9606 GN=SLC4A7 PE=1 SV=2	12.9837	12.8767	8.40687	8.16355	12.3494	6.25278	6.02065	6.02911	2.94471
754	TRUE	P07093|GDN_HUMAN	17.57	11.56	4	4		Glia-derived nexin OS=Homo sapiens OX=9606 GN=SERPINE2 PE=1 SV=1	6.27877	6.46404	7.1174	7.68074	5.52532	4.50394	2.50823	2.51922	3.12106
148	TRUE	P16070|CD44_HUMAN	22.65	8.09	6	6	Oxidation (M)	CD44 antigen OS=Homo sapiens OX=9606 GN=CD44 PE=1 SV=3	13.2441	13.2586	13.8454	14.0205	11.5633	11.5148	9.29325	9.50311	3.1235
165	TRUE	P07996|TSP1_HUMAN	29.19	13.85	12	12	Oxidation (M)	Thrombospondin-1 OS=Homo sapiens OX=9606 GN=THBS1 PE=1 SV=2	11.3656	11.5581	12.5062	12.3297	8.87503	9.19839	7.81483	8.44361	3.35696
252	TRUE	P55290|CAD13_HUMAN	29.32	5.19	3	3		Cadherin-13 OS=Homo sapiens OX=9606 GN=CDH13 PE=1 SV=1	6.67135	6.60624	7.58808	6.46654	3.24328	3.29649	3.7967	3.50761	3.37204
1173	TRUE	Q8N474|SFRP1_HUMAN	56.6	3.18	1	1		Secreted frizzled-related protein 1 OS=Homo sapiens OX=9606 GN=SFRP1 PE=1 SV=1	6.19874	5.75593	7.24644	7.22284	2.68639	2.18882	1.25574	1.15059	4.7856
284	TRUE	Q8TD16|BICD2_HUMAN	22.56	1.21	1	1		Protein bicaudal D homolog 2 OS=Homo sapiens OX=9606 GN=BICD2 PE=1 SV=1	13.2132	13.1533	2.96531	3.4638	2.27345	2.25026	3.95923	2.76632	5.38658
21	TRUE	P02751|FINC_HUMAN	24.81	35.04	76	76	Carbamidomethylation;Oxidation (M)	Fibronectin OS=Homo sapiens OX=9606 GN=FN1 PE=1 SV=5	16.0204	15.9912	16.1933	16.2098	7.83886	9.45576	11.3219	11.8763	5.98048
369	TRUE	Q8WUX1|S38A5_HUMAN	57.15	12.08	5	5	Acetylation (N-term);Oxidation (M)	Sodium-coupled neutral amino acid transporter 5 OS=Homo sapiens OX=9606 GN=SLC38A5 PE=1 SV=1	10.8489	10.8243	11.2273	11.5367	5.35958	4.93039	4.57261	4.78114	6.19837
45	TRUE	P15144|AMPN_HUMAN	52.82	28.02	23	23	Oxidation (M)	Aminopeptidase N OS=Homo sapiens OX=9606 GN=ANPEP PE=1 SV=4	11.3556	11.4613	12.1607	12.1757	5.91095	5.91861	5.3026	5.20882	6.20308

## Sheet: Significance < 0.05
Protein Group	Top	Accession	Significance	Coverage (%)	#Peptides	#Unique	PTM	Description	Myc_EV_2-2 Area	Myc_EV_2-1 Area	Myc_EV_1-2 Area	Myc_EV_1-1 Area	Control_EV_2-2 Area	Control_EV_2-1 Area	Control_EV_1-2 Area	Control_EV_1-1 Area	Pvalue	Myc/Control	Uniprot	Gene Name
45	TRUE	P15144|AMPN_HUMAN	52.82	28.02	23	23	Oxidation (M)	Aminopeptidase N OS=Homo sapiens OX=9606 GN=ANPEP PE=1 SV=4	11.3556	11.4613	12.1607	12.1757	5.91095	5.91861	5.3026	5.20882	8.67681e-07	6.20308	P15144	ANPEP
369	TRUE	Q8WUX1|S38A5_HUMAN	57.15	12.08	5	5	Acetylation (N-term);Oxidation (M)	Sodium-coupled neutral amino acid transporter 5 OS=Homo sapiens OX=9606 GN=SLC38A5 PE=1 SV=1	10.8489	10.8243	11.2273	11.5367	5.35958	4.93039	4.57261	4.78114	2.11155e-07	6.19837	Q8WUX1	SLC38A5
21	TRUE	P02751|FINC_HUMAN	24.81	35.04	76	76	Carbamidomethylation;Oxidation (M)	Fibronectin OS=Homo sapiens OX=9606 GN=FN1 PE=1 SV=5	16.0204	15.9912	16.1933	16.2098	7.83886	9.45576	11.3219	11.8763	0.00727905	5.98048	P02751	FN1
1173	TRUE	Q8N474|SFRP1_HUMAN	56.6	3.18	1	1		Secreted frizzled-related protein 1 OS=Homo sapiens OX=9606 GN=SFRP1 PE=1 SV=1	6.19874	5.75593	7.24644	7.22284	2.68639	2.18882	1.25574	1.15059	0.00010009	4.7856	Q8N474	SFRP1
252	TRUE	P55290|CAD13_HUMAN	29.32	5.19	3	3		Cadherin-13 OS=Homo sapiens OX=9606 GN=CDH13 PE=1 SV=1	6.67135	6.60624	7.58808	6.46654	3.24328	3.29649	3.7967	3.50761	0.000173041	3.37204	P55290	CDH13
165	TRUE	P07996|TSP1_HUMAN	29.19	13.85	12	12	Oxidation (M)	Thrombospondin-1 OS=Homo sapiens OX=9606 GN=THBS1 PE=1 SV=2	11.3656	11.5581	12.5062	12.3297	8.87503	9.19839	7.81483	8.44361	0.000183557	3.35696	P07996	THBS1
148	TRUE	P16070|CD44_HUMAN	22.65	8.09	6	6	Oxidation (M)	CD44 antigen OS=Homo sapiens OX=9606 GN=CD44 PE=1 SV=3	13.2441	13.2586	13.8454	14.0205	11.5633	11.5148	9.29325	9.50311	0.0110833	3.1235	P16070	CD44
754	TRUE	P07093|GDN_HUMAN	17.57	11.56	4	4		Glia-derived nexin OS=Homo sapiens OX=9606 GN=SERPINE2 PE=1 SV=1	6.27877	6.46404	7.1174	7.68074	5.52532	4.50394	2.50823	2.51922	0.0182935	3.12106	P07093	SERPINE2
39	TRUE	P08670|VIME_HUMAN	16.18	18.45	11	7	Oxidation (M)	Vimentin OS=Homo sapiens OX=9606 GN=VIM PE=1 SV=4	7.00708	6.77941	6.94623	7.63379	4.21293	3.04537	5.04318	5.00471	0.00563787	2.76508	P08670	VIM
1025	TRUE	P00918|CAH2_HUMAN	7.05	5	1	1		Carbonic anhydrase 2 OS=Homo sapiens OX=9606 GN=CA2 PE=1 SV=2	7.52685	3.75021	6.11795	6.4061	3.18289	2.7589	3.46481	4.05961	0.0410645	2.58372	P00918	CA2
1068	TRUE	Q9BXS9|S26A6_HUMAN	7.63	4.35	2	2	Oxidation (M)	Solute carrier family 26 member 6 OS=Homo sapiens OX=9606 GN=SLC26A6 PE=1 SV=1	4.33214	5.52138	6.51683	6.6212	3.92694	4.53019	1.80259	2.88761	0.0224209	2.46105	Q9BXS9	SLC26A6
1450	TRUE	Q7L0Q8|RHOU_HUMAN	9.33	4.65	1	1		Rho-related GTP-binding protein RhoU OS=Homo sapiens OX=9606 GN=RHOU PE=1 SV=1	7.05744	7.12983	8.02272	8.00819	5.62086	3.20874	5.98802	6.00069	0.0321342	2.34997	Q7L0Q8	RHOU
167	TRUE	P13010|XRCC5_HUMAN	10.27	3.01	2	2		X-ray repair cross-complementing protein 5 OS=Homo sapiens OX=9606 GN=XRCC5 PE=1 SV=3	6.05683	5.18656	6.17495	6.02124	1.97736	3.87667	4.04008	4.27009	0.0150651	2.31884	P13010	XRCC5
648	TRUE	O43570|CAH12_HUMAN	19.11	19.21	5	5	Oxidation (M)	Carbonic anhydrase 12 OS=Homo sapiens OX=9606 GN=CA12 PE=1 SV=1	8.11939	9.83281	9.44989	9.34281	7.20003	7.0429	6.54035	6.70446	0.00455171	2.31429	O43570	CA12
1083	TRUE	P09496|CLCA_HUMAN	38.97	11.69	2	2		Clathrin light chain A OS=Homo sapiens OX=9606 GN=CLTA PE=1 SV=1	7.52915	8.14652	7.24191	7.60103	6.00333	5.50042	5.0051	4.90414	0.00050816	2.2764	P09496	CLTA
168	TRUE	P21589|5NTD_HUMAN	14.28	23	10	10	Oxidation (M)	5'-nucleotidase OS=Homo sapiens OX=9606 GN=NT5E PE=1 SV=1	8.92198	9.37114	10.2097	10.1789	8.37247	8.12004	7.00649	6.51232	0.00897272	2.16761	P21589	NT5E
770	TRUE	P05121|PAI1_HUMAN	34.27	12.94	4	4	Oxidation (M)	Plasminogen activator inhibitor 1 OS=Homo sapiens OX=9606 GN=SERPINE1 PE=1 SV=1	8.04017	7.48871	7.23917	7.46818	6.25708	5.73202	4.97988	4.93323	0.00291481	2.08351	P05121	SERPINE1
615	TRUE	O14763|TR10B_HUMAN	11.73	11.59	4	4	Oxidation (M)	Tumor necrosis factor receptor superfamily member 10B OS=Homo sapiens OX=9606 GN=TNFRSF10B PE=1 SV=2	8.17671	7.64711	8.67383	8.90246	7.53023	6.91948	5.8656	5.08695	0.0260429	1.99946	O14763	TNFRSF10B
262	TRUE	O00468|AGRIN_HUMAN	17.38	8.8	13	13		Agrin OS=Homo sapiens OX=9606 GN=AGRN PE=1 SV=6	10.3139	10.3656	10.3474	10.3943	9.18129	9.24287	7.12072	7.96659	0.0305824	1.97743	O00468	AGRN
18	TRUE	Q00610|CLH1_HUMAN	18.48	29.61	46	35	Carbamidomethylation;Oxidation (M)	Clathrin heavy chain 1 OS=Homo sapiens OX=9606 GN=CLTC PE=1 SV=5	11.7833	11.6614	12.2574	12.5632	10.1995	10.455	9.84969	9.90781	0.000453935	1.96331	Q00610	CLTC
1205	TRUE	Q15043|S39AE_HUMAN	17.25	2.64	1	1		Metal cation symporter ZIP14 OS=Homo sapiens OX=9606 GN=SLC39A14 PE=1 SV=3	8.57963	7.94381	8.8295	8.78261	6.8075	7.37716	6.04625	6.0773	0.00338254	1.95683	Q15043	SLC39A14
153	TRUE	P98160|PGBM_HUMAN	9.92	5.4	18	18	Oxidation (M)	Basement membrane-specific heparan sulfate proteoglycan core protein OS=Homo sapiens OX=9606 GN=HSPG2 PE=1 SV=4	8.2161	8.03233	9.72506	9.71516	7.35249	7.11834	6.90954	6.64095	0.0203375	1.91683	P98160	HSPG2
93	TRUE	P10809|CH60_HUMAN	16.77	11.87	5	5	Oxidation (M)	60 kDa heat shock protein, mitochondrial OS=Homo sapiens OX=9606 GN=HSPD1 PE=1 SV=2	7.69911	7.66127	8.18979	8.04402	6.31461	5.50099	6.2135	5.93234	0.000241444	1.90819	P10809	HSPD1
579	TRUE	Q9UHX3|AGRE2_HUMAN	8.53	1.82	1	1	Oxidation (M)	Adhesion G protein-coupled receptor E2 OS=Homo sapiens OX=9606 GN=ADGRE2 PE=1 SV=2	4.78506	5.03509	5.24053	6.22777	5.15787	3.51263	2.49225	3.06596	0.046064	1.76494	Q9UHX3	ADGRE2
182	TRUE	Q04912|RON_HUMAN	7.59	1.71	2	2		Macrophage-stimulating protein receptor OS=Homo sapiens OX=9606 GN=MST1R PE=1 SV=3	3.94414	5.34538	6.12136	5.26571	3.48333	4.60681	2.65671	2.89984	0.0310377	1.75748	Q04912	MST1R
121	TRUE	P20020|AT2B1_HUMAN	12.86	10.98	20	10	Oxidation (M)	Plasma membrane calcium-transporting ATPase 1 OS=Homo sapiens OX=9606 GN=ATP2B1 PE=1 SV=4	9.60027	9.59422	10.3422	10.3235	9.23971	8.12853	7.60084	7.92639	0.00884721	1.7412	P20020	ATP2B1
130	TRUE	Q12860|CNTN1_HUMAN	8.78	20.43	15	15	Oxidation (M)	Contactin-1 OS=Homo sapiens OX=9606 GN=CNTN1 PE=1 SV=1	7.85534	8.78961	9.3168	9.73798	7.40356	7.83061	6.96375	6.62668	0.0155637	1.71879	Q12860	CNTN1
289	TRUE	P50570|DYN2_HUMAN	9.29	2.18	1	1		Dynamin-2 OS=Homo sapiens OX=9606 GN=DNM2 PE=1 SV=2	4.87387	4.99792	5.70307	5.77255	3.10678	3.59081	3.72664	4.10276	0.00162142	1.70511	P50570	DNM2
347	TRUE	O15439|MRP4_HUMAN	11.95	3.7	4	4		Multidrug resistance-associated protein 4 OS=Homo sapiens OX=9606 GN=ABCC4 PE=1 SV=3	6.71058	6.70399	7.27428	7.5514	6.32829	5.59765	5.00729	4.52273	0.014206	1.69608	O15439	ABCC4
829	TRUE	P51636|CAV2_HUMAN	12.59	26.54	2	2	Oxidation (M)	Caveolin-2 OS=Homo sapiens OX=9606 GN=CAV2 PE=1 SV=2	9.4283	9.25956	8.33689	8.31305	8.02324	8.08446	6.18387	6.2969	0.0402079	1.68733	P51636	CAV2
710	TRUE	Q9H2J7|S6A15_HUMAN	11.82	5.75	3	3		Sodium-dependent neutral amino acid transporter B(0)AT2 OS=Homo sapiens OX=9606 GN=SLC6A15 PE=1 SV=1	6.2522	6.38119	6.54707	6.61167	5.37083	5.73776	4.42491	3.67645	0.0365954	1.64554	Q9H2J7	SLC6A15
113	TRUE	Q9P273|TEN3_HUMAN	15.6	0.44	1	1		Teneurin-3 OS=Homo sapiens OX=9606 GN=TENM3 PE=1 SV=3	5.09713	5.34291	4.8931	5.03535	3.53519	4.48792	2.67785	3.14953	0.0207876	1.6295	Q9P273	TENM3
727	TRUE	Q9Y6M5|ZNT1_HUMAN	7.4	12.82	4	4		Zinc transporter 1 OS=Homo sapiens OX=9606 GN=SLC30A1 PE=1 SV=3	9.48824	9.65051	10.5991	10.6639	9.24859	9.3939	7.37181	8.04453	0.0395109	1.58575	Q9Y6M5	SLC30A1
1073	TRUE	Q9Y5Y0|FLVC1_HUMAN	9.03	4.68	2	2		Feline leukemia virus subgroup C receptor-related protein 1 OS=Homo sapiens OX=9606 GN=FLVCR1 PE=1 SV=1	5.64813	5.69258	5.76365	5.64852	4.62165	4.69716	4.53041	2.64843	0.0502124	1.56381	Q9Y5Y0	FLVCR1
114	TRUE	O95714|HERC2_HUMAN	21.91	0.19	1	1		E3 ubiquitin-protein ligase HERC2 OS=Homo sapiens OX=9606 GN=HERC2 PE=1 SV=2	16.1034	15.9431	15.5302	15.891	14.3371	14.9142	14.1408	13.9035	0.00191199	1.54304	O95714	HERC2
478	TRUE	Q8TD43|TRPM4_HUMAN	10.34	5.77	6	6	Oxidation (M)	Transient receptor potential cation channel subfamily M member 4 OS=Homo sapiens OX=9606 GN=TRPM4 PE=1 SV=1	7.66184	7.59339	8.63643	8.17493	6.942	6.96052	6.00909	6.0181	0.00575827	1.53422	Q8TD43	TRPM4
753	TRUE	O75131|CPNE3_HUMAN	10.82	5.03	3	3		Copine-3 OS=Homo sapiens OX=9606 GN=CPNE3 PE=1 SV=1	7.25701	7.01968	7.81607	7.66238	6.22253	6.68033	5.19261	5.52582	0.0119127	1.53346	O75131	CPNE3
1551	TRUE	Q96A54|PAQR1_HUMAN	5.57	3.2	1	1		Adiponectin receptor protein 1 OS=Homo sapiens OX=9606 GN=ADIPOR1 PE=1 SV=1	4.47282	4.1205	6.04053	5.59595	4.09371	4.23226	2.67702	3.2253	0.0442208	1.50038	Q96A54	ADIPOR1
393	TRUE	P48960|AGRE5_HUMAN	9.68	8.74	4	4	Oxidation (M)	Adhesion G protein-coupled receptor E5 OS=Homo sapiens OX=9606 GN=ADGRE5 PE=1 SV=4	8.28765	8.32458	9.26604	8.92562	7.5816	7.7566	6.72847	6.75685	0.00620023	1.4951	P48960	ADGRE5
222	TRUE	Q14118|DAG1_HUMAN	7.42	1.23	1	1		Dystroglycan OS=Homo sapiens OX=9606 GN=DAG1 PE=1 SV=2	4.92376	5.22119	5.68879	5.41905	3.40355	3.8564	4.1568	4.09703	0.000894992	1.43475	Q14118	DAG1
758	TRUE	Q96RD7|PANX1_HUMAN	6.57	9.15	3	3		Pannexin-1 OS=Homo sapiens OX=9606 GN=PANX1 PE=1 SV=4	7.80042	7.94896	8.80982	8.79514	7.51343	7.69171	6.42654	6.136	0.0290974	1.39667	Q96RD7	PANX1
122	TRUE	P52597|HNRPF_HUMAN	4.66	10.6	3	3		Heterogeneous nuclear ribonucleoprotein F OS=Homo sapiens OX=9606 GN=HNRNPF PE=1 SV=3	8.26804	8.00553	9.11549	9.13159	6.96029	6.77908	7.50774	7.83527	0.0120902	1.35957	P52597	HNRNPF
117	TRUE	Q8WUM4|PDC6I_HUMAN	10.46	34.79	27	27	Oxidation (M)	Programmed cell death 6-interacting protein OS=Homo sapiens OX=9606 GN=PDCD6IP PE=1 SV=1	12.5548	12.5689	12.9012	12.7805	11.4642	12.0021	11.1536	10.9607	0.00659205	1.30623	Q8WUM4	PDCD6IP
473	TRUE	P78536|ADA17_HUMAN	8.14	6.07	4	4	Oxidation (M)	Disintegrin and metalloproteinase domain-containing protein 17 OS=Homo sapiens OX=9606 GN=ADAM17 PE=1 SV=1	8.1553	8.02796	8.40898	8.0243	7.29816	6.61937	7.17358	6.57567	0.00303033	1.23744	P78536	ADAM17
46	TRUE	P53396|ACLY_HUMAN	5.46	16.17	13	13	Oxidation (M)	ATP-citrate synthase OS=Homo sapiens OX=9606 GN=ACLY PE=1 SV=3	7.97821	8.11576	8.52762	8.95555	8.02247	7.36088	6.74664	6.645	0.0245918	1.20054	P53396	ACLY
564	TRUE	Q9H6X2|ANTR1_HUMAN	3.24	1.77	1	1		Anthrax toxin receptor 1 OS=Homo sapiens OX=9606 GN=ANTXR1 PE=1 SV=2	3.8177	3.64427	4.20719	4.15428	3.1891	3.16762	2.28134	2.49801	0.00787389	1.17185	Q9H6X2	ANTXR1
4	TRUE	O75369|FLNB_HUMAN	2.81	14.45	30	28	Oxidation (M)	Filamin-B OS=Homo sapiens OX=9606 GN=FLNB PE=1 SV=2	8.73592	8.50554	9.59349	9.2364	7.50024	7.46361	8.19417	8.39159	0.0162093	1.13043	O75369	FLNB
2	TRUE	Q09666|AHNK_HUMAN	4.6	9.1	36	36	Acetylation (N-term);Oxidation (M)	Neuroblast differentiation-associated protein AHNAK OS=Homo sapiens OX=9606 GN=AHNAK PE=1 SV=2	17.0721	17.0626	17.706	17.6859	16.5193	16.4389	15.925	16.28	0.00361754	1.09087	Q09666	AHNAK
659	TRUE	Q01844|EWS_HUMAN	5.11	2.13	1	1		RNA-binding protein EWS OS=Homo sapiens OX=9606 GN=EWSR1 PE=1 SV=1	5.99292	5.68677	5.15125	5.63612	4.6213	5.06894	3.72702	4.82609	0.0276407	1.05593	Q01844	EWSR1
143	TRUE	P13637|AT1A3_HUMAN	4.84	2.27	14	1	Carbamidomethylation	Sodium/potassium-transporting ATPase subunit alpha-3 OS=Homo sapiens OX=9606 GN=ATP1A3 PE=1 SV=3	5.80067	6.13357	5.06883	5.74493	4.51046	5.01611	4.30606	4.8089	0.0114572	1.02662	P13637	ATP1A3
229	TRUE	Q9Y624|JAM1_HUMAN	2.76	28.43	9	9	Oxidation (M)	Junctional adhesion molecule A OS=Homo sapiens OX=9606 GN=F11R PE=1 SV=1	12.8601	12.7842	12.6036	12.5265	10.8867	12.3242	11.7991	11.6656	0.0367712	1.02468	Q9Y624	F11R
54	TRUE	P08238|HS90B_HUMAN	2.5	16.71	22	11	Oxidation (M)	Heat shock protein HSP 90-beta OS=Homo sapiens OX=9606 GN=HSP90AB1 PE=1 SV=4	10.4353	10.4708	11.292	11.4769	10.0193	10.3962	9.64314	9.55552	0.0257198	1.0152	P08238	HSP90AB1
679	TRUE	Q13444|ADA15_HUMAN	8.68	1.74	1	1		Disintegrin and metalloproteinase domain-containing protein 15 OS=Homo sapiens OX=9606 GN=ADAM15 PE=1 SV=4	6.77995	6.74243	6.41216	6.90551	6.04491	5.97687	5.23301	5.52823	0.00680713	1.01426	Q13444	ADAM15
1176	TRUE	O75787|RENR_HUMAN	6.49	5.71	2	2		Renin receptor OS=Homo sapiens OX=9606 GN=ATP6AP2 PE=1 SV=2	9.62778	9.65369	9.66313	9.63533	8.91488	9.16294	8.29483	8.21684	0.0231157	0.997612	O75787	ATP6AP2
572	TRUE	P16422|EPCAM_HUMAN	3.46	19.43	4	4	Oxidation (M)	Epithelial cell adhesion molecule OS=Homo sapiens OX=9606 GN=EPCAM PE=1 SV=2	9.34478	9.87031	9.83448	9.84378	9.23087	9.26376	8.34696	8.15931	0.0357207	0.97311	P16422	EPCAM
612	TRUE	P30419|NMT1_HUMAN	4.41	2.82	1	1	Oxidation (M)	Glycylpeptide N-tetradecanoyltransferase 1 OS=Homo sapiens OX=9606 GN=NMT1 PE=1 SV=2	8.27426	8.29019	8.27637	8.26272	7.90933	7.77113	6.82497	6.88947	0.047539	0.92716	P30419	NMT1
15	TRUE	P49327|FAS_HUMAN	1.23	12.58	23	23	Oxidation (M)	Fatty acid synthase OS=Homo sapiens OX=9606 GN=FASN PE=1 SV=3	9.19093	9.26602	9.93349	9.62864	8.44948	9.41601	8.26156	8.36026	0.0380818	0.882941	P49327	FASN
723	TRUE	Q08357|S20A2_HUMAN	0.84	1.53	1	1		Sodium-dependent phosphate transporter 2 OS=Homo sapiens OX=9606 GN=SLC20A2 PE=1 SV=1	4.28668	4.53337	4.89126	5.19869	3.9842	4.49803	3.80971	3.23421	0.0446005	0.845961	Q08357	SLC20A2
179	TRUE	Q15046|SYK_HUMAN	0.76	5.7	3	3	Oxidation (M)	Lysine--tRNA ligase OS=Homo sapiens OX=9606 GN=KARS1 PE=1 SV=3	7.25915	7.03329	7.28841	7.3796	6.76199	6.26107	6.15214	6.55195	0.00469026	0.808326	Q15046	KARS1
693	TRUE	P09497|CLCB_HUMAN	0.45	16.59	4	4		Clathrin light chain B OS=Homo sapiens OX=9606 GN=CLTB PE=1 SV=1	6.55766	6.4182	6.74398	6.17351	5.52525	6.21691	5.67794	5.30368	0.017925	0.792398	P09497	CLTB
539	TRUE	P20073|ANXA7_HUMAN	0.49	9.63	4	4		Annexin A7 OS=Homo sapiens OX=9606 GN=ANXA7 PE=1 SV=3	8.1798	7.52176	7.45327	7.53778	6.9309	7.47228	6.73494	6.40734	0.0333236	0.786785	P20073	ANXA7
1006	TRUE	P48595|SPB10_HUMAN	4.38	6.55	3	3	Acetylation (N-term)	Serpin B10 OS=Homo sapiens OX=9606 GN=SERPINB10 PE=1 SV=1	10.0598	10.2035	10.1584	10.3897	9.41519	9.80534	9.94955	10.0055	0.0462514	0.408923	P48595	SERPINB10
58	TRUE	P11142|HSP7C_HUMAN	17.8	32.04	25	16	Oxidation (M)	Heat shock cognate 71 kDa protein OS=Homo sapiens OX=9606 GN=HSPA8 PE=1 SV=1	10.6056	10.4892	10.7002	10.7951	10.8516	10.9336	11.4169	11.4877	0.0412106	-0.524908	P11142	HSPA8
1013	TRUE	P49755|TMEDA_HUMAN	17.06	9.59	2	2		Transmembrane emp24 domain-containing protein 10 OS=Homo sapiens OX=9606 GN=TMED10 PE=1 SV=2	5.82541	5.60022	6.11852	6.25622	6.42825	6.18557	7.0192	6.97594	0.0356957	-0.702148	P49755	TMED10
515	TRUE	P23528|COF1_HUMAN	22.61	46.39	6	6	Acetylation (N-term)	Cofilin-1 OS=Homo sapiens OX=9606 GN=CFL1 PE=1 SV=3	9.01149	9.04057	9.10668	9.2373	9.4916	9.84997	10.0956	10.1149	0.00835275	-0.789003	P23528	CFL1
595	TRUE	O00299|CLIC1_HUMAN	27.65	15.77	3	3	Oxidation (M)	Chloride intracellular channel protein 1 OS=Homo sapiens OX=9606 GN=CLIC1 PE=1 SV=4	8.51223	8.98915	9.15074	9.27151	10.0055	10.1189	9.5648	9.56674	0.00961138	-0.833068	O00299	CLIC1
20	TRUE	P35908|K22E_HUMAN	35.27	69.64	71	49	Oxidation (M)	Keratin, type II cytoskeletal 2 epidermal OS=Homo sapiens OX=9606 GN=KRT2 PE=1 SV=2	14.6107	14.5787	14.6538	14.6687	15.5772	15.4471	15.4086	15.4594	8.78728e-06	-0.845081	P35908	KRT2
480	TRUE	Q9H6S3|ES8L2_HUMAN	22.6	1.82	1	1		Epidermal growth factor receptor kinase substrate 8-like protein 2 OS=Homo sapiens OX=9606 GN=EPS8L2 PE=1 SV=2	3.39196	3.105	4.06862	3.88289	4.65815	4.69589	3.99267	4.52116	0.0232249	-0.85485	Q9H6S3	EPS8L2
676	TRUE	O95716|RAB3D_HUMAN	26.62	6.85	1	1		Ras-related protein Rab-3D OS=Homo sapiens OX=9606 GN=RAB3D PE=1 SV=1	4.72313	4.83907	4.68944	5.66313	6.21065	5.96806	5.65754	5.57477	0.0233853	-0.874063	O95716	RAB3D
929	TRUE	Q9UHG3|PCYOX_HUMAN	90.14	1.78	1	1		Prenylcysteine oxidase 1 OS=Homo sapiens OX=9606 GN=PCYOX1 PE=1 SV=3	3.97962	2.68439	3.11009	3.10663	4.52883	4.18426	4.07299	3.64744	0.040138	-0.888199	Q9UHG3	PCYOX1
383	TRUE	P15531|NDKA_HUMAN	30.82	34.87	7	7	Oxidation (M)	Nucleoside diphosphate kinase A OS=Homo sapiens OX=9606 GN=NME1 PE=1 SV=1	8.44013	7.78649	7.21785	7.45193	8.61285	8.71897	8.94371	8.77786	0.0258655	-1.03925	P15531	NME1
302	TRUE	Q01518|CAP1_HUMAN	21.48	14.53	6	6	Carbamidomethylation;Oxidation (M)	Adenylyl cyclase-associated protein 1 OS=Homo sapiens OX=9606 GN=CAP1 PE=1 SV=5	6.33694	7.10088	5.80454	7.0875	7.50723	7.21927	7.95599	7.89626	0.0344782	-1.06223	Q01518	CAP1
418	TRUE	P35241|RADI_HUMAN	20.79	4.46	6	2	Oxidation (M)	Radixin OS=Homo sapiens OX=9606 GN=RDX PE=1 SV=1	4.06747	4.91925	5.52871	5.30464	6.71099	6.20996	5.19765	6.18404	0.0476314	-1.12064	P35241	RDX
303	TRUE	O95817|BAG3_HUMAN	41.34	2.43	1	1		BAG family molecular chaperone regulator 3 OS=Homo sapiens OX=9606 GN=BAG3 PE=1 SV=3	4.56915	4.46229	4.51002	4.51518	5.98618	5.46157	5.50371	5.64998	0.00195085	-1.1362	O95817	BAG3
352	TRUE	P09543|CN37_HUMAN	30.36	19.95	7	7	Oxidation (M)	2',3'-cyclic-nucleotide 3'-phosphodiesterase OS=Homo sapiens OX=9606 GN=CNP PE=1 SV=2	7.21558	7.25791	7.69311	7.68976	8.9934	9.30828	8.03707	8.15135	0.0265692	-1.15843	P09543	CNP
947	TRUE	P11234|RALB_HUMAN	19.8	6.8	1	1		Ras-related protein Ral-B OS=Homo sapiens OX=9606 GN=RALB PE=1 SV=1	6.883	7.61907	8.51679	8.50886	9.59556	9.72013	8.5189	8.6586	0.0504129	-1.24137	P11234	RALB
288	TRUE	P15311|EZRI_HUMAN	44.16	21.16	14	10	Oxidation (M)	Ezrin OS=Homo sapiens OX=9606 GN=EZR PE=1 SV=4	8.09248	7.33511	7.17749	6.98831	9.11185	8.63691	8.29341	8.65712	0.00641363	-1.27648	P15311	EZR
100	TRUE	Q13835|PKP1_HUMAN	20.47	10.58	6	6	Oxidation (M)	Plakophilin-1 OS=Homo sapiens OX=9606 GN=PKP1 PE=1 SV=2	6.65762	6.17272	7.13965	6.91037	7.38532	7.81406	8.43172	8.36133	0.00783302	-1.27802	Q13835	PKP1
44	TRUE	P12814|ACTN1_HUMAN	25.9	21.86	18	14	Oxidation (M)	Alpha-actinin-1 OS=Homo sapiens OX=9606 GN=ACTN1 PE=1 SV=2	8.93744	9.10142	9.81367	9.92763	10.8024	10.7301	10.6884	10.7825	0.0130037	-1.30579	P12814	ACTN1
1313	TRUE	Q14210|LY6D_HUMAN	24.98	10.94	1	1		Lymphocyte antigen 6D OS=Homo sapiens OX=9606 GN=LY6D PE=1 SV=1	2.97539	3.82739	4.03198	4.04659	5.27712	5.16414	5.16753	4.54107	0.00680158	-1.31713	Q14210	LY6D
287	TRUE	Q04917|1433F_HUMAN	25.52	30.89	7	7	Oxidation (M)	14-3-3 protein eta OS=Homo sapiens OX=9606 GN=YWHAH PE=1 SV=4	8.81143	8.73423	9.71206	9.74013	10.6979	10.6194	10.6439	10.6254	0.0146202	-1.39718	Q04917	YWHAH
147	TRUE	Q9Y446|PKP3_HUMAN	15.85	18.32	10	10		Plakophilin-3 OS=Homo sapiens OX=9606 GN=PKP3 PE=1 SV=1	6.25767	6.00481	7.61662	7.09995	7.50698	7.63364	9.17777	9.08559	0.0349334	-1.60623	Q9Y446	PKP3
353	TRUE	P18206|VINC_HUMAN	22.48	13.58	10	10	Oxidation (M)	Vinculin OS=Homo sapiens OX=9606 GN=VCL PE=1 SV=4	5.81716	5.78736	6.63724	6.24602	6.79161	8.15315	7.92436	8.09998	0.00770193	-1.62033	P18206	VCL
1312	TRUE	P0CG04|IGLC1_HUMAN	20.44	14.15	1	1		Immunoglobulin lambda constant 1 OS=Homo sapiens OX=9606 GN=IGLC1 PE=1 SV=1	6.63085	5.79967	5.00613	6.95054	7.09736	7.40629	8.18975	8.29115	0.0242085	-1.64934	P0CG04	IGLC1
1312	TRUE	P0DOY3|IGLC3_HUMAN	20.44	14.15	1	1		Immunoglobulin lambda constant 3 OS=Homo sapiens OX=9606 GN=IGLC3 PE=1 SV=1	6.63085	5.79967	5.00613	6.95054	7.09736	7.40629	8.18975	8.29115	0.0242085	-1.64934	P0DOY3	IGLC3
1312	TRUE	P0DOY2|IGLC2_HUMAN	20.44	14.15	1	1		Immunoglobulin lambda constant 2 OS=Homo sapiens OX=9606 GN=IGLC2 PE=1 SV=1	6.63085	5.79967	5.00613	6.95054	7.09736	7.40629	8.18975	8.29115	0.0242085	-1.64934	P0DOY2	IGLC2
1312	TRUE	A0M8Q6|IGLC7_HUMAN	20.44	14.15	1	1		Immunoglobulin lambda constant 7 OS=Homo sapiens OX=9606 GN=IGLC7 PE=1 SV=3	6.63085	5.79967	5.00613	6.95054	7.09736	7.40629	8.18975	8.29115	0.0242085	-1.64934	A0M8Q6	IGLC7
1312	TRUE	P0CF74|IGLC6_HUMAN	20.44	14.15	1	1		Immunoglobulin lambda constant 6 OS=Homo sapiens OX=9606 GN=IGLC6 PE=1 SV=1	6.63085	5.79967	5.00613	6.95054	7.09736	7.40629	8.18975	8.29115	0.0242085	-1.64934	P0CF74	IGLC6
1312	TRUE	B9A064|IGLL5_HUMAN	20.44	7.01	1	1		Immunoglobulin lambda-like polypeptide 5 OS=Homo sapiens OX=9606 GN=IGLL5 PE=2 SV=2	6.63085	5.79967	5.00613	6.95054	7.09736	7.40629	8.18975	8.29115	0.0242085	-1.64934	B9A064	IGLL5
1312	TRUE	P0DOX8|IGL1_HUMAN	20.44	6.94	1	1		Immunoglobulin lambda-1 light chain OS=Homo sapiens OX=9606 PE=1 SV=1	6.63085	5.79967	5.00613	6.95054	7.09736	7.40629	8.18975	8.29115	0.0242085	-1.64934	P0DOX8
587	TRUE	Q14108|SCRB2_HUMAN	53.66	23.43	7	7	Oxidation (M)	Lysosome membrane protein 2 OS=Homo sapiens OX=9606 GN=SCARB2 PE=1 SV=2	7.52921	8.04817	7.30576	7.56622	9.97649	10.1509	9.05277	9.25014	0.00156166	-1.99523	Q14108	SCARB2
840	TRUE	P11279|LAMP1_HUMAN	24.5	6	2	2		Lysosome-associated membrane glycoprotein 1 OS=Homo sapiens OX=9606 GN=LAMP1 PE=1 SV=3	4.84219	7.05837	7.02189	5.74658	8.31808	8.5041	7.93892	7.98086	0.0291204	-2.01823	P11279	LAMP1
695	TRUE	P60953|CDC42_HUMAN	24.25	31.41	6	6	Carbamidomethylation	Cell division control protein 42 homolog OS=Homo sapiens OX=9606 GN=CDC42 PE=1 SV=2	7.54052	7.94811	9.34833	9.28625	11.0208	11.1537	10.061	10.0802	0.012993	-2.04814	P60953	CDC42
445	TRUE	Q5D862|FILA2_HUMAN	35.11	2.09	4	4		Filaggrin-2 OS=Homo sapiens OX=9606 GN=FLG2 PE=1 SV=1	7.63161	8.02534	6.6852	6.87031	9.00265	9.35789	9.25568	9.90392	0.00257985	-2.07692	Q5D862	FLG2
410	TRUE	P01889|HLAB_HUMAN	22.7	9.39	7	2		HLA class I histocompatibility antigen, B alpha chain OS=Homo sapiens OX=9606 GN=HLA-B PE=1 SV=3	7.00596	8.67739	8.24881	8.41415	11.4392	11.414	8.99936	9.08293	0.0443137	-2.1473	P01889	HLA-B
245	TRUE	P04083|ANXA1_HUMAN	18.42	54.05	15	15	Oxidation (M)	Annexin A1 OS=Homo sapiens OX=9606 GN=ANXA1 PE=1 SV=2	8.32479	8.87084	9.71997	9.91915	10.4774	10.5862	12.5292	12.5366	0.0189583	-2.32367	P04083	ANXA1
38	TRUE	P14923|PLAK_HUMAN	23.21	30.2	22	17	Oxidation (M)	Junction plakoglobin OS=Homo sapiens OX=9606 GN=JUP PE=1 SV=3	9.74751	10.1506	10.0933	10.1303	11.5622	11.519	13.3935	13.3523	0.0177605	-2.42631	P14923	JUP
185	TRUE	P22735|TGM1_HUMAN	59.56	12.85	8	8		Protein-glutamine gamma-glutamyltransferase K OS=Homo sapiens OX=9606 GN=TGM1 PE=1 SV=4	7.03841	6.9883	7.00415	7.06359	9.69619	9.58013	9.30687	9.34045	8.22207e-05	-2.4573	P22735	TGM1
265	TRUE	P07476|INVO_HUMAN	17.75	24.1	11	11		Involucrin OS=Homo sapiens OX=9606 GN=IVL PE=1 SV=2	4.78978	4.34095	5.87921	5.23179	6.18115	6.47062	8.8187	8.64129	0.029997	-2.46751	P07476	IVL
169	TRUE	Q08431|MFGM_HUMAN	31.86	54.01	21	21	Oxidation (M)	Lactadherin OS=Homo sapiens OX=9606 GN=MFGE8 PE=1 SV=3	10.9432	10.9685	11.9353	12.0063	14.8364	14.6664	13.1159	13.3149	0.00479705	-2.52006	Q08431	MFGE8
939	TRUE	Q10589|BST2_HUMAN	24.2	13.89	2	2		Bone marrow stromal antigen 2 OS=Homo sapiens OX=9606 GN=BST2 PE=1 SV=1	6.39443	4.87041	5.84232	5.89761	9.64713	9.73538	6.72198	7.17275	0.0412016	-2.56812	Q10589	BST2
128	TRUE	P04792|HSPB1_HUMAN	19.78	65.85	14	14	Oxidation (M)	Heat shock protein beta-1 OS=Homo sapiens OX=9606 GN=HSPB1 PE=1 SV=2	7.90253	7.77717	7.93853	8.17921	9.48474	9.58522	12.4516	12.4752	0.0358897	-3.04982	P04792	HSPB1
106	TRUE	Q92817|EVPL_HUMAN	37.76	6.49	10	10		Envoplakin OS=Homo sapiens OX=9606 GN=EVPL PE=1 SV=3	3.39349	2.15112	3.40257	2.60309	4.32454	4.59769	7.43334	7.82503	0.0354307	-3.15758	Q92817	EVPL
1030	TRUE	Q01628|IFM3_HUMAN	29.18	30.83	2	2	Oxidation (M)	Interferon-induced transmembrane protein 3 OS=Homo sapiens OX=9606 GN=IFITM3 PE=1 SV=2	6.54597	5.91641	7.53156	7.5777	10.7674	11.6487	9.70459	8.87475	0.00520832	-3.35593	Q01628	IFITM3
208	TRUE	P14735|IDE_HUMAN	21.33	20.31	18	18	Oxidation (M)	Insulin-degrading enzyme OS=Homo sapiens OX=9606 GN=IDE PE=1 SV=4	4.64631	4.61751	4.46953	4.93072	10.3386	5.28842	8.45519	8.56232	0.0441869	-3.49513	P14735	IDE
863	TRUE	Q15517|CDSN_HUMAN	16.62	7.94	2	2	Oxidation (M)	Corneodesmosin OS=Homo sapiens OX=9606 GN=CDSN PE=1 SV=3	6.94632	6.91418	3.69313	8.09594	8.41709	8.49173	11.7454	11.8028	0.0334236	-3.70184	Q15517	CDSN

## Sheet: Z-score
Protein Group	Top	Accession	Significance	Coverage (%)	#Peptides	#Unique	PTM	Description	Myc_EV_2-2 Area	Myc_EV_2-1 Area	Myc_EV_1-2 Area	Myc_EV_1-1 Area	Control_EV_2-2 Area	Control_EV_2-1 Area	Control_EV_1-2 Area	Control_EV_1-1 Area	Myc/Control
45	TRUE	P15144|AMPN_HUMAN	52.82	28.02	23	23	Oxidation (M)	Aminopeptidase N OS=Homo sapiens OX=9606 GN=ANPEP PE=1 SV=4	0.799613	0.831279	1.04085	1.04532	-0.831679	-0.829384	-1.01395	-1.04205	6.20308
[truncated: 105 more rows]
