# Supplementary material for: Cell-surface tethered promiscuous biotinylators enable comparative small-scale surface proteomic analysis of human extracellular vesicles and cells
Source: eLife journal article supplement (doi:10.7554/elife.73982), 2022-03-04
Supplement: supp [file elife-73982-supp-v1.zip › elife_poa_e73982_Figure_4_source_data_4.xlsx]

## Sheet: Sheet1
Myc EV vs Control EV
Upregulated in Control		Upregulated in Myc
Protein	Fold-change	Protein	Fold-change
CDSN	0.614656	ANPEP	73.6737
IDE	0.561334	SLC38A5	73.4335
IFITM3	0.55668	FN1	63.14
BST2	0.401334	SFRP1	27.581
MFGE8	0.325261	CDH13	10.3534
ANXA1	0.246861	THBS1	10.2458
HLA-B	0.225734	CD44	8.71498
LAMP1	0.199759	SERPINE2	8.70026
IGLC1	0.18604	VIM	6.79786
LY6D	0.168624	SLC26A6	5.50619
KRT2	0.0976705	CA12	4.9736
CLIC1	0.0886873	NT5E	4.49279
TMED10	0.0768482	SERPINE1	4.23836
		TNFRSF10B	3.99852
		AGRN	3.9379
		SLC39A14	3.88209
		HSPG2	3.77593
		MST1R	3.38107
		ATP2B1	3.34313
		CNTN1	3.29159
		ABCC4	3.24019
		SLC6A15	3.12865
		TENM3	3.09405
		SLC30A1	3.00163
		FLVCR1	2.95633
		DAG1	2.70335
		PANX1	2.63293
		ADAM17	2.35779
		ANTXR1	2.253
		ATP1A3	2.03725
		F11R	2.03451
		ADAM15	2.01986
		EPCAM	1.96307
		SLC20A2	1.79746
		KARS1	1.75118
Figure 4–Source data 4. List of proteins comparing enriched targets (>1.5-fold) in Myc EVs versus Control EVs. Surface and secreted targets that were found enriched (Myc/Control) in the Control EVs (left) and Myc EVs (right). The fold-change between Myc EVs and Control EVs is listed in the column to the right of the gene name.		ANXA7	1.72523
