# Supplementary material for: Cell-surface tethered promiscuous biotinylators enable comparative small-scale surface proteomic analysis of human extracellular vesicles and cells
Source: eLife journal article supplement (doi:10.7554/elife.73982), 2022-03-04
Supplement: supp [file elife-73982-supp-v1.zip › elife_poa_e73982_Figure_5_source_data_2.xlsx]

## Sheet: Appendix
Sample Origin	Sample Names	Sheet Titles	Description
Cellular and EV + WGA-HRP	Control_Cells_1-1	Raw Values	Area values produced from PEAKS Online X version 1.5
	Control_Cells_1-2	Total Area Normalization	Area values divided by the summed total area intensity
	Control_Cells_2-1	Imputed Matrix	Normalized values were log2(x) transformed and imputed using standard settings in Perseus
	Control_Cells_2-2	Significance < 0.05	Imputed matrix was triaged for proteins with significant differences between EV and cellular samples. Significance was based on p-values < 0.05 determined by standard unpaired Student t-test with unequal variances.
	Myc_Cells_1-1	Z-score	In order to plot heatmap figures, Z-scores were determined for each sample using the following equation: (LFQ area - Mean LFQ Area)/Standard Deviation.
	Myc_Cells_1-2
	Myc_Cells_2-1
	Myc_Cells_2-2
	Control_EV_1-1
	Control_EV_1-2
	Control_EV_2-1
	Control_EV_2-2
	Myc_EV_1-1
	Myc_EV_1-2
	Myc_EV_2-1
	Myc_EV_2-2

## Sheet: Raw Values
Protein Group	Top	Accession	Significance	Coverage (%)	#Peptides	#Unique	PTM	Myc_Exosomes_2-2 Area	Myc_Exosomes_2-1 Area	Myc_Exosomes_1-2 Area	Myc_Exosomes_1-1 Area	EV_Exosomes_2-2 Area	EV_Exosomes_2-1 Area	EV_Exosomes_1-2 Area	EV_Exosomes_1-1 Area	Myc_Cells_2-2 Area	Myc_Cells_2-1 Area	Myc_Cells_1-2 Area	Myc_Cells_1-1 Area	EV_Cells_2-2 Area	EV_Cells_2-1 Area	EV_Cells_1-2 Area	EV_Cells_1-1 Area	Sample Profile (Ratio)	Myc Exo Area	EV Exo Area	Myc Cell Area	EV Cell Area	Group Profile (Ratio)	Avg. Mass	Description
412	TRUE	Q9HD26|GOPC_HUMAN	90.21	28.14	10	10	Carbamidomethylation	79.3122	0	60.8486	74.9392	0	156.797	117.209	242.391	3672.53	3254	2351.38	2399.18	3230.28	3556.46	2601.54	3199.31	0.05:0.00:0.04:0.05:0.00:0.10:0.08:0.16:2.35:2.08:1.51:1.54:2.07:2.28:1.67:2.05	145.02	265.837	2919.27	3146.9	0.09:0.16:1.80:1.94	50520	Golgi-associated PDZ and coiled-coil motif-containing protein OS=Homo sapiens OX=9606 GN=GOPC PE=1 SV=1
862	TRUE	Q16512|PKN1_HUMAN	50.79	4.25	4	3	Oxidation (M)	54.0668	49.0179	34.5847	0	59.7675	261.909	130.093	76.0104	704.647	543.635	619.526	405.06	620.477	377.851	499.592	655.162	0.17:0.15:0.11:0.00:0.19:0.82:0.41:0.24:2.21:1.71:1.95:1.27:1.95:1.19:1.57:2.06	86.1271	175.927	717.601	538.27	0.23:0.46:1.89:1.42	103932	Serine/threonine-protein kinase N1 OS=Homo sapiens OX=9606 GN=PKN1 PE=1 SV=2
36	TRUE	P35222|CTNB1_HUMAN	111.14	54.42	43	34	Acetylation (N-term); Carbamidomethylation; Oxidation (M)	2422.64	2483.95	4331.75	3460.06	6567.39	4569.72	5672.6	3879.01	146588	143551	120159	117955	166209	162576	159199	101061	0.03:0.03:0.06:0.05:0.09:0.06:0.08:0.05:2.04:2.00:1.67:1.64:2.31:2.26:2.21:1.41	3174.6	5172.18	132126	147261	0.04:0.07:1.84:2.05	85497	Catenin beta-1 OS=Homo sapiens OX=9606 GN=CTNNB1 PE=1 SV=1
198	TRUE	Q6P1M0|S27A4_HUMAN	56.47	30.48	18	18	Carbamidomethylation; Oxidation (M)	423.91	421.218	1057.64	892.353	1098.93	829.348	566.936	1316.15	4972.57	4432.12	4657.07	5230.8	3954.47	3070.04	6160.32	5322.69	0.15:0.15:0.38:0.32:0.40:0.30:0.20:0.47:1.79:1.60:1.68:1.88:1.42:1.11:2.22:1.92	983.929	952.842	4823.14	4626.88	0.35:0.33:1.69:1.63	72064	Long-chain fatty acid transport protein 4 OS=Homo sapiens OX=9606 GN=SLC27A4 PE=1 SV=1
129	TRUE	P05141|ADT2_HUMAN	137.87	19.8	21	11	Carbamidomethylation; Oxidation (M)	985.573	953.881	778.374	822.106	713.909	1073.1	1505.23	1430.37	178063	171818	197833	196027	253509	270564	282343	194564	0.02:0.02:0.02:0.02:0.02:0.02:0.02:0.02:1.63:1.57:1.81:1.79:2.31:2.47:2.58:1.78	884.984	1180.65	185936	250245	0.02:0.02:1.70:2.28	32852	ADP/ATP translocase 2 OS=Homo sapiens OX=9606 GN=SLC25A5 PE=1 SV=7
78	TRUE	P02786|TFR1_HUMAN	50.77	43.95	33	33	Oxidation (M)	3124.67	2993.43	7704.96	10088.2	6376.36	6294.56	12935.2	1617.03	67337.7	57255.6	49629.8	59667.1	72441.2	63058.1	90014.9	94126.3	0.08:0.08:0.20:0.27:0.17:0.17:0.34:0.04:1.78:1.52:1.31:1.58:1.92:1.67:2.38:2.49	5977.8	6805.79	58472.5	79910.2	0.16:0.18:1.55:2.11	84871	Transferrin receptor protein 1 OS=Homo sapiens OX=9606 GN=TFRC PE=1 SV=2
110	TRUE	P23396|RS3_HUMAN	100.86	62.14	24	24	Carbamidomethylation; Oxidation (M)	2526.08	2750.07	5568.96	5849.99	3084.67	4363.24	5476.58	4912.33	332481	324702	182322	184218	264474	204347	289925	268169	0.02:0.02:0.04:0.04:0.02:0.03:0.04:0.04:2.55:2.49:1.40:1.41:2.03:1.57:2.22:2.06	4173.78	4459.21	255931	256729	0.03:0.03:1.96:1.97	26688	40S ribosomal protein S3 OS=Homo sapiens OX=9606 GN=RPS3 PE=1 SV=2
201	TRUE	P30530|UFO_HUMAN	35.61	17.11	13	12	Oxidation (M)	591.874	1245.78	721.478	411.774	597.197	1458.6	703.009	606.163	3276.13	2576.61	1744.22	1952.64	2212.84	2631.61	2515.83	1931.29	0.38:0.79:0.46:0.26:0.38:0.93:0.45:0.39:2.08:1.64:1.11:1.24:1.41:1.67:1.60:1.23	742.728	841.242	2387.4	2322.89	0.47:0.53:1.52:1.48	98337	Tyrosine-protein kinase receptor UFO OS=Homo sapiens OX=9606 GN=AXL PE=1 SV=4
102	TRUE	P06756|ITAV_HUMAN	28.73	27.86	25	25	Carbamidomethylation; Oxidation (M)	5553.15	6122.85	22381.3	22293.9	16388.2	18770	8621.08	7366.21	58768.8	57710.6	35758.5	34913.8	44487.7	32309.7	45133.4	50525.7	0.19:0.21:0.77:0.76:0.56:0.64:0.30:0.25:2.01:1.98:1.22:1.20:1.52:1.11:1.55:1.73	14087.8	12786.4	46787.9	43114.1	0.48:0.44:1.60:1.48	116038	Integrin alpha-V OS=Homo sapiens OX=9606 GN=ITGAV PE=1 SV=2
590	TRUE	Q14624|ITIH4_HUMAN	69.21	9.68	7	7	Oxidation (M)	28183.7	22809.6	39542.2	39307.8	42358.5	52545.7	46887.5	44679.6	3099.76	3382.75	2484.78	2356.6	333.253	2917.05	678.772	676.172	1.36:1.10:1.90:1.89:2.04:2.53:2.26:2.15:0.15:0.16:0.12:0.11:0.02:0.14:0.03:0.03	32460.8	46617.8	2874.14	1151.31	1.56:2.24:0.14:0.06	103357	Inter-alpha-trypsin inhibitor heavy chain H4 OS=Homo sapiens OX=9606 GN=ITIH4 PE=1 SV=4
396	TRUE	P08865|RSSA_HUMAN	67.92	52.2	10	10	Acetylation (N-term); Carbamidomethylation; Oxidation (M)	888.882	725.399	1083.7	687.307	678.498	668.437	1330.41	870.327	6509.16	6122.41	3620.73	3159.34	5157.36	5732.48	5317.26	5767.79	0.29:0.24:0.36:0.23:0.22:0.22:0.44:0.29:2.16:2.03:1.20:1.05:1.71:1.90:1.76:1.91	846.323	886.918	4852.91	5493.72	0.28:0.29:1.61:1.82	32854	40S ribosomal protein SA OS=Homo sapiens OX=9606 GN=RPSA PE=1 SV=4
948	TRUE	Q6PCB8|EMB_HUMAN	54.2	13.76	3	3		791.52	767.669	887.824	567.216	2318.91	2516.16	701.385	852.377	4371.58	4291.34	8423.93	8235.34	7453.58	8793.65	7702.72	9163.91	0.19:0.18:0.21:0.13:0.55:0.59:0.17:0.20:1.03:1.01:1.99:1.94:1.76:2.07:1.82:2.16	753.557	1597.21	6330.55	8278.47	0.18:0.38:1.49:1.95	36881	Embigin OS=Homo sapiens OX=9606 GN=EMB PE=1 SV=1
35	TRUE	Q6YHK3|CD109_HUMAN	58.05	46.85	54	54	Carbamidomethylation; Oxidation (M)	4138.75	4765.3	15540.8	15919	14238.1	11208.5	5067.81	4026.38	144023	153532	91774.6	89706.7	193478	149871	132407	113609	0.06:0.07:0.22:0.22:0.20:0.16:0.07:0.06:2.02:2.15:1.28:1.26:2.71:2.10:1.85:1.59	10091	8635.22	119759	147341	0.14:0.12:1.68:2.06	161689	CD109 antigen OS=Homo sapiens OX=9606 GN=CD109 PE=1 SV=2
414	TRUE	O95793|STAU1_HUMAN	63.97	20.28	10	10	Oxidation (M)	62.2509	79.2029	69.3578	55.471	52.3128	73.6816	255.973	218.486	2025.54	1683.68	939.092	1327.7	1140.36	1041.45	1343.01	1206.9	0.09:0.11:0.10:0.08:0.07:0.10:0.35:0.30:2.80:2.33:1.30:1.84:1.58:1.44:1.86:1.67	66.5706	150.113	1494	1182.93	0.09:0.21:2.07:1.64	63182	Double-stranded RNA-binding protein Staufen homolog 1 OS=Homo sapiens OX=9606 GN=STAU1 PE=1 SV=2
730	TRUE	O14966|RAB7L_HUMAN	89.92	22.17	5	4		302.143	556.236	425.093	404.73	319.887	465.616	425.699	409.274	4948.82	5082.27	2973.83	3058.86	4891.12	6478.76	4387.16	4445.77	0.12:0.22:0.17:0.16:0.13:0.19:0.17:0.17:2.00:2.05:1.20:1.24:1.98:2.62:1.77:1.80	422.051	405.119	4533.66	5274.18	0.16:0.15:1.71:1.98	23155	Ras-related protein Rab-7L1 OS=Homo sapiens OX=9606 GN=RAB29 PE=1 SV=1
206	TRUE	P12235|ADT1_HUMAN	119.45	22.82	18	8	Acetylation (N-term); Carbamidomethylation; Oxidation (M)	341.406	254.464	340.86	296.021	558.557	581.706	1142.31	891.421	28168.7	27560.3	23998.5	24725.4	34376.8	27162.5	46228	43877.2	0.02:0.02:0.02:0.02:0.03:0.04:0.07:0.05:1.73:1.69:1.47:1.52:2.11:1.67:2.84:2.69	308.188	823.008	26113.2	37911.1	0.02:0.05:1.60:2.33	33064	ADP/ATP translocase 1 OS=Homo sapiens OX=9606 GN=SLC25A4 PE=1 SV=4
87	TRUE	P05556|ITB1_HUMAN	28.73	23.81	24	24	Carbamidomethylation; Oxidation (M)	36354.9	39513.7	94937.7	97187.3	126170	132240	46135.9	39135.6	302891	282482	154563	159187	288394	233808	261627	237567	0.23:0.25:0.60:0.61:0.80:0.84:0.29:0.25:1.91:1.78:0.98:1.01:1.82:1.48:1.65:1.50	66998.4	85920.4	224781	255349	0.42:0.54:1.42:1.61	88415	Integrin beta-1 OS=Homo sapiens OX=9606 GN=ITGB1 PE=1 SV=2
999	TRUE	Q04771|ACVR1_HUMAN	74.39	6.68	3	3	Oxidation (M)	421.933	327.262	181.719	238.444	438.173	313.403	315.299	281.365	1358.43	1231.74	1394.72	1493.65	2356.82	2195.93	1973.03	1654.12	0.42:0.32:0.18:0.24:0.43:0.31:0.31:0.28:1.34:1.22:1.38:1.48:2.33:2.17:1.95:1.64	333.022	370.679	1369.63	2044.98	0.32:0.36:1.33:1.99	57153	Activin receptor type-1 OS=Homo sapiens OX=9606 GN=ACVR1 PE=1 SV=1
116	TRUE	P25705|ATPA_HUMAN	112.62	47.92	26	26	Carbamidomethylation; Oxidation (M)	1233.46	1373.63	1723.63	1172.64	1568.65	1762.84	2645.74	2486.01	145366	143397	88493.9	88715.3	131235	90279.5	173059	184996	0.02:0.02:0.03:0.02:0.02:0.03:0.04:0.04:2.20:2.17:1.34:1.34:1.98:1.36:2.61:2.79	1391.61	2115.81	116493	144893	0.02:0.03:1.76:2.19	59751	ATP synthase subunit alpha, mitochondrial OS=Homo sapiens OX=9606 GN=ATP5F1A PE=1 SV=1
260	TRUE	P02787|TRFE_HUMAN	72.1	23.64	15	15	Oxidation (M)	12639.1	12151.4	23749.7	23709	23346.7	22182.8	19756.5	16433	3725.08	2264.64	2462.03	3197.33	3711.82	2910.27	2913.51	3891.65	1.13:1.09:2.12:2.12:2.09:1.98:1.77:1.47:0.33:0.20:0.22:0.29:0.33:0.26:0.26:0.35	18062.3	20429.8	2912.27	3356.81	1.61:1.83:0.26:0.30	77064	Serotransferrin OS=Homo sapiens OX=9606 GN=TF PE=1 SV=3
289	TRUE	P50570|DYN2_HUMAN	50.29	19.89	13	13	Carbamidomethylation; Oxidation (M)	335.523	335.686	758.217	762.504	167.912	225.168	559.898	543.835	4254.28	4056.25	1872.57	3106.13	2406.03	4440.1	2927.64	4116.6	0.17:0.17:0.39:0.40:0.09:0.12:0.29:0.28:2.21:2.10:0.97:1.61:1.25:2.30:1.52:2.13	547.982	405.942	3322.31	3472.59	0.28:0.21:1.71:1.79	98064	Dynamin-2 OS=Homo sapiens OX=9606 GN=DNM2 PE=1 SV=2
229	TRUE	Q9Y624|JAM1_HUMAN	45.84	49.5	15	15	Carbamidomethylation; Oxidation (M)	4329.95	3717.12	11801	11307.3	17118.4	17398.8	5788.52	5326.66	89120.6	77428.4	39696.1	38764.4	87864.7	66463.4	71726	78590.8	0.11:0.09:0.30:0.29:0.44:0.44:0.15:0.14:2.28:1.98:1.01:0.99:2.24:1.70:1.83:2.01	7788.86	11408.1	61252.3	76161.2	0.20:0.29:1.56:1.95	32583	Junctional adhesion molecule A OS=Homo sapiens OX=9606 GN=F11R PE=1 SV=1
846	TRUE	Q9Y5X3|SNX5_HUMAN	52.09	14.36	5	5	Acetylation (N-term); Oxidation (M)	98.9116	128.689	267.711	266.928	239.122	239.584	305.582	395.583	1489.08	1679.98	959.121	917.524	1456.47	760.605	1145.53	1420.8	0.13:0.17:0.36:0.36:0.33:0.33:0.42:0.54:2.02:2.28:1.30:1.25:1.98:1.03:1.56:1.93	253.134	294.968	1261.43	1195.85	0.34:0.39:1.68:1.59	46816	Sorting nexin-5 OS=Homo sapiens OX=9606 GN=SNX5 PE=1 SV=1
74	TRUE	P08069|IGF1R_HUMAN	94.08	24.87	29	25	Carbamidomethylation; Oxidation (M)	1080.38	833.499	649.355	1273.62	1009.37	1409.61	1337.81	1257.31	31074.3	34730.4	15450.1	15729.2	35215.5	25160.2	29946	33821.6	0.08:0.06:0.05:0.09:0.07:0.10:0.09:0.09:2.16:2.42:1.07:1.09:2.45:1.75:2.08:2.35	959.213	1253.53	24246	31035.8	0.07:0.09:1.69:2.16	154793	Insulin-like growth factor 1 receptor OS=Homo sapiens OX=9606 GN=IGF1R PE=1 SV=1
68	TRUE	P08581|MET_HUMAN	69.83	30.65	34	34	Carbamidomethylation; Oxidation (M)	2720.22	2600.22	5812.8	5012.35	2840.12	3264.44	1131.03	1571.29	52522.9	52026.2	24357.3	24468.3	59909.1	45931.1	48856.1	47087.3	0.11:0.11:0.24:0.21:0.12:0.14:0.05:0.07:2.21:2.19:1.03:1.03:2.52:1.93:2.06:1.98	4036.4	2201.72	38343.7	50445.9	0.17:0.09:1.61:2.12	155541	Hepatocyte growth factor receptor OS=Homo sapiens OX=9606 GN=MET PE=1 SV=4
559	TRUE	Q06787|FMR1_HUMAN	61.51	9.65	5	5		257.797	251.276	284.681	709.493	318.886	505.332	421.955	367.657	3588.63	2739.37	1910.85	1636.22	2225.18	3213.87	3282.69	3746.43	0.16:0.16:0.18:0.45:0.20:0.32:0.27:0.23:2.26:1.72:1.20:1.03:1.40:2.02:2.06:2.35	405.031	403.458	2468.77	3117.04	0.25:0.25:1.54:1.95	71174	Synaptic functional regulator FMR1 OS=Homo sapiens OX=9606 GN=FMR1 PE=1 SV=1
544	TRUE	Q8TCT9|HM13_HUMAN	79.34	18.83	7	7	Oxidation (M)	947.061	964.116	1142	1190.72	1500.06	1523.23	1073.14	948.711	10461.1	13636.2	6399.65	5507.99	13181.6	12347.4	10211.6	10990	0.16:0.17:0.20:0.21:0.26:0.26:0.19:0.16:1.82:2.37:1.11:0.96:2.29:2.15:1.78:1.91	1060.97	1261.29	9001.23	11682.7	0.18:0.22:1.57:2.03	41488	Minor histocompatibility antigen H13 OS=Homo sapiens OX=9606 GN=HM13 PE=1 SV=1
537	TRUE	P48730|KC1D_HUMAN	101.85	18.55	7	7	Oxidation (M)	278.07	278.631	413.23	348.719	405.921	389.621	512.583	440.099	6671.67	7122.33	6352.26	5973.69	6736.76	12202.9	5530.85	5709.03	0.07:0.08:0.11:0.09:0.11:0.11:0.14:0.12:1.80:1.92:1.71:1.61:1.82:3.29:1.49:1.54	329.662	437.056	6529.99	7544.89	0.09:0.12:1.76:2.03	47330	Casein kinase I isoform delta OS=Homo sapiens OX=9606 GN=CSNK1D PE=1 SV=2
344	TRUE	P54709|AT1B3_HUMAN	43.53	43.37	12	12	Oxidation (M)	5024.28	4741.79	13102.3	12678.8	10298.8	11675.8	5017.95	5778.34	43308.9	42192.7	31274.9	29586.9	26053.7	40576.5	58363.2	54295	0.20:0.19:0.53:0.51:0.42:0.47:0.20:0.23:1.76:1.71:1.27:1.20:1.06:1.65:2.37:2.21	8886.81	8192.72	36590.9	44822.1	0.36:0.33:1.49:1.82	31513	Sodium/potassium-transporting ATPase subunit beta-3 OS=Homo sapiens OX=9606 GN=ATP1B3 PE=1 SV=1
556	TRUE	Q96P48|ARAP1_HUMAN	53.45	7.52	7	7		726.647	624.359	911.331	928.514	668.987	1009.32	1032.17	1068.42	4265.69	2487.87	3006.95	3420.12	3764.21	3217.73	3327.08	1692.69	0.36:0.31:0.45:0.46:0.33:0.50:0.51:0.53:2.12:1.24:1.50:1.70:1.87:1.60:1.66:0.84	797.713	944.726	3295.16	3000.43	0.40:0.47:1.64:1.49	162192	Arf-GAP with Rho-GAP domain, ANK repeat and PH domain-containing protein 1 OS=Homo sapiens OX=9606 GN=ARAP1 PE=1 SV=3
173	TRUE	O75146|HIP1R_HUMAN	53.38	22.57	19	18	Oxidation (M)	660.877	506.516	591.194	786.516	540.37	677.659	1948.71	2119.34	8180.77	9208.64	4117.25	4294.23	8887.27	5703.65	8753.05	9686.7	0.16:0.12:0.14:0.19:0.13:0.16:0.47:0.51:1.96:2.21:0.99:1.03:2.13:1.37:2.10:2.32	636.276	1375.15	6450.22	8257.67	0.15:0.33:1.54:1.98	119388	Huntingtin-interacting protein 1-related protein OS=Homo sapiens OX=9606 GN=HIP1R PE=1 SV=2
259	TRUE	P63244|RACK1_HUMAN	94.25	67.82	14	14	Carbamidomethylation; Oxidation (M)	1131	694.458	1746.4	1525.72	1913.11	1901.38	1930.71	2104.42	87525.4	94153.3	37865.1	40820.5	65229.6	52593.4	65189.1	58062.8	0.04:0.02:0.05:0.05:0.06:0.06:0.06:0.07:2.72:2.93:1.18:1.27:2.03:1.64:2.03:1.81	1274.39	1962.41	65091.1	60268.7	0.04:0.06:2.02:1.87	35077	Receptor of activated protein C kinase 1 OS=Homo sapiens OX=9606 GN=RACK1 PE=1 SV=3
48	TRUE	P35221|CTNA1_HUMAN	58.11	51.21	40	32	Acetylation (N-term); Carbamidomethylation; Oxidation (M)	3963.16	3793.44	12340.7	12305.6	23465.1	27897.5	9317.3	7193.72	198229	209755	101852	92479.2	262268	167951	196803	215065	0.04:0.04:0.13:0.13:0.24:0.29:0.10:0.07:2.05:2.17:1.06:0.96:2.72:1.74:2.04:2.23	8100.73	16968.4	150579	210522	0.08:0.18:1.56:2.18	100071	Catenin alpha-1 OS=Homo sapiens OX=9606 GN=CTNNA1 PE=1 SV=1
30	TRUE	P49368|TCPG_HUMAN	114.78	72.11	47	47	Carbamidomethylation; Oxidation (M)	2855.25	2819.96	3044.89	2436.44	3709.79	3911.79	4590.02	4443.56	301827	287549	138691	140183	341164	221904	332007	365531	0.02:0.02:0.02:0.02:0.03:0.03:0.03:0.03:2.24:2.13:1.03:1.04:2.53:1.65:2.46:2.71	2789.13	4163.79	217063	315151	0.02:0.03:1.61:2.34	60534	T-complex protein 1 subunit gamma OS=Homo sapiens OX=9606 GN=CCT3 PE=1 SV=4
533	TRUE	P21796|VDAC1_HUMAN	100.74	43.46	9	9		314.394	288.186	444.325	426.281	716.699	655.621	639.702	678.056	11929.3	12266.7	6622.68	6396.75	6024.05	6417.78	7120.89	7206.27	0.07:0.07:0.10:0.10:0.17:0.15:0.15:0.16:2.80:2.88:1.55:1.50:1.41:1.51:1.67:1.69	368.296	672.519	9303.85	6692.24	0.09:0.16:2.18:1.57	30773	Voltage-dependent anion-selective channel protein 1 OS=Homo sapiens OX=9606 GN=VDAC1 PE=1 SV=2
84	TRUE	P27824|CALX_HUMAN	59.66	40.2	25	25	Oxidation (M)	7010.42	7001.6	9805.91	9761.31	7050.44	6155.24	15562.3	14994.4	86988.2	93278	40119.8	40882.3	84756.4	61931.5	91063.2	86889.3	0.17:0.17:0.24:0.24:0.17:0.15:0.38:0.36:2.10:2.25:0.97:0.99:2.04:1.49:2.20:2.10	8394.81	10940.6	65317.1	81160.1	0.20:0.26:1.58:1.96	67568	Calnexin OS=Homo sapiens OX=9606 GN=CANX PE=1 SV=2
222	TRUE	Q14118|DAG1_HUMAN	72.46	19.22	15	15	Oxidation (M)	894.402	1377.43	2403.46	2252	1372.17	1702.17	2449.85	2235.36	36184.4	35216.5	18342.9	16126.7	29872.4	20638.8	20684.7	20501.5	0.07:0.10:0.18:0.17:0.10:0.13:0.18:0.17:2.73:2.65:1.38:1.22:2.25:1.56:1.56:1.55	1731.82	2087.15	26467.6	22924.4	0.13:0.16:1.99:1.72	97441	Dystroglycan OS=Homo sapiens OX=9606 GN=DAG1 PE=1 SV=2
739	TRUE	Q16513|PKN2_HUMAN	44.66	6.2	6	5	Oxidation (M)	46.7775	0	0	61.5073	73.1949	0	0	60.5677	949.495	1173.83	408.595	739.865	1034.14	446.866	874.041	1033.97	0.11:0.00:0.00:0.14:0.17:0.00:0.00:0.14:2.20:2.72:0.95:1.71:2.40:1.04:2.03:2.40	108.285	133.763	905.07	949.228	0.21:0.26:1.73:1.81	112035	Serine/threonine-protein kinase N2 OS=Homo sapiens OX=9606 GN=PKN2 PE=1 SV=1
72	TRUE	P11021|BIP_HUMAN	67.32	49.24	38	33	Oxidation (M)	11793.5	11212.6	9343.91	8824.19	10187.1	11184.8	12141.3	6592.06	98200.9	99290	44557	42229.5	84414.6	60469.8	73870.8	79051	0.28:0.27:0.23:0.21:0.25:0.27:0.29:0.16:2.37:2.39:1.07:1.02:2.04:1.46:1.78:1.91	10293.6	10026.3	71069.4	74451.6	0.25:0.24:1.71:1.80	72333	Endoplasmic reticulum chaperone BiP OS=Homo sapiens OX=9606 GN=HSPA5 PE=1 SV=2
291	TRUE	Q8N4S9|MALD2_HUMAN	72.55	21.86	11	11	Oxidation (M)	835.057	812.532	1351.1	1714.56	1592.85	1303.55	1918.18	1297.14	15654.4	14454.6	6545.74	7146.34	17232.9	13667.6	16723	16807.8	0.11:0.11:0.18:0.23:0.21:0.18:0.26:0.17:2.10:1.94:0.88:0.96:2.32:1.84:2.25:2.26	1178.31	1527.93	10950.3	16107.8	0.16:0.21:1.47:2.16	64168	MARVEL domain-containing protein 2 OS=Homo sapiens OX=9606 GN=MARVELD2 PE=1 SV=2
851	TRUE	Q8NF37|PCAT1_HUMAN	36.23	9.55	5	5		562.864	534.813	551.389	167.036	1468.13	699.2	481.525	136.999	4137.93	3072.47	2194.9	2572.4	5437.14	5177.86	3001.2	3402.88	0.27:0.25:0.26:0.08:0.70:0.33:0.23:0.07:1.97:1.46:1.05:1.22:2.59:2.47:1.43:1.62	509.508	749.236	2994.43	4254.77	0.24:0.35:1.41:2.00	59151	Lysophosphatidylcholine acyltransferase 1 OS=Homo sapiens OX=9606 GN=LPCAT1 PE=1 SV=2
347	TRUE	O15439|MRP4_HUMAN	31.3	9.96	11	11	Oxidation (M)	1209.61	1308.1	805.501	1658.99	1467.64	658.45	1377.83	1460.09	3438.24	3516.9	2970.15	3104.01	3220.3	2003.05	1673.51	3111.82	0.59:0.63:0.39:0.80:0.71:0.32:0.67:0.71:1.67:1.71:1.44:1.51:1.56:0.97:0.81:1.51	1245.55	1241	3257.33	2502.17	0.60:0.60:1.58:1.21	149527	Multidrug resistance-associated protein 4 OS=Homo sapiens OX=9606 GN=ABCC4 PE=1 SV=3
1248	TRUE	Q15390|MTFR1_HUMAN	126.56	8.41	2	2		0	0	0	0	0	0	0	0	1042.98	984.48	387.032	364.975	766.305	540.171	822.45	822.678	0.00:0.00:0.00:0.00:0.00:0.00:0.00:0.00:2.91:2.75:1.08:1.02:2.14:1.51:2.30:2.30	0	0	694.866	737.901	0.00:0.00:1.94:2.06	37000	Mitochondrial fission regulator 1 OS=Homo sapiens OX=9606 GN=MTFR1 PE=1 SV=2
433	TRUE	Q9NP72|RAB18_HUMAN	41.65	49.51	9	8	Carbamidomethylation; Oxidation (M)	278.39	347.126	3172.59	2147.49	733.802	599.895	786.661	1073.9	16859.2	17917.1	7111.52	6534.25	14887.7	10212.1	15348.7	11548.3	0.04:0.05:0.46:0.31:0.11:0.09:0.11:0.16:2.46:2.62:1.04:0.95:2.17:1.49:2.24:1.69	1520.49	798.565	12105.5	12999.2	0.22:0.12:1.77:1.90	22977	Ras-related protein Rab-18 OS=Homo sapiens OX=9606 GN=RAB18 PE=1 SV=1
473	TRUE	P78536|ADA17_HUMAN	58.85	12.5	8	8	Oxidation (M)	2093.72	2188.08	1869.48	1497.03	1093.6	656.935	3013.15	1300.14	19844	14289.6	9205.97	9008.13	17185.2	11405.7	21045.8	20703.4	0.25:0.26:0.22:0.18:0.13:0.08:0.35:0.15:2.33:1.68:1.08:1.06:2.02:1.34:2.47:2.43	1912.08	1515.96	13086.9	17585	0.22:0.18:1.54:2.06	93021	Disintegrin and metalloproteinase domain-containing protein 17 OS=Homo sapiens OX=9606 GN=ADAM17 PE=1 SV=1
16	TRUE	Q5T4S7|UBR4_HUMAN	68	21.84	83	83	Carbamidomethylation; Oxidation (M)	632.172	511.534	1082.43	1004.78	655.241	523.358	464.585	550.062	17815.5	18255.7	13617.1	3628.75	14943.8	10953.8	12579.3	13173.3	0.09:0.07:0.16:0.15:0.09:0.08:0.07:0.08:2.58:2.65:1.97:0.53:2.17:1.59:1.82:1.91	807.729	601.741	13329.3	12912.5	0.12:0.09:1.93:1.87	573841	E3 ubiquitin-protein ligase UBR4 OS=Homo sapiens OX=9606 GN=UBR4 PE=1 SV=1
679	TRUE	Q13444|ADA15_HUMAN	73.46	8.57	5	5		628.138	675.617	628.099	772.566	689.245	548.305	537.099	497.452	7255.55	7205.27	2877.01	3379.05	6910.13	4799.24	4361.32	5223.93	0.21:0.23:0.21:0.26:0.23:0.19:0.18:0.17:2.47:2.45:0.98:1.15:2.35:1.63:1.49:1.78	676.105	614.23	5270.68	5696.04	0.22:0.20:1.72:1.86	92959	Disintegrin and metalloproteinase domain-containing protein 15 OS=Homo sapiens OX=9606 GN=ADAM15 PE=1 SV=4
239	TRUE	Q16625|OCLN_HUMAN	23.59	35.82	17	17	Oxidation (M)	1190.36	2219.82	10491.8	10662.7	5258.92	10744.6	4028.51	1750.1	30314.1	29741.5	12391.7	12784.8	30639.3	22062.8	32053.6	27710	0.08:0.15:0.69:0.70:0.34:0.70:0.26:0.11:1.99:1.95:0.81:0.84:2.01:1.45:2.10:1.82	6141.16	5445.52	21476.8	28116.4	0.40:0.36:1.40:1.84	59144	Occludin OS=Homo sapiens OX=9606 GN=OCLN PE=1 SV=1
268	TRUE	Q9P0V3|SH3B4_HUMAN	53.05	22.95	16	16	Carbamidomethylation; Oxidation (M)	574.364	624.758	366.003	539.485	806.857	866.051	578.587	565.16	5871.68	5287.12	5761.41	1335.61	5277.81	3682.01	5093.6	6187.68	0.21:0.23:0.13:0.20:0.30:0.32:0.21:0.21:2.16:1.95:2.12:0.49:1.94:1.36:1.88:2.28	526.152	704.164	4563.96	5060.28	0.19:0.26:1.68:1.86	107496	SH3 domain-binding protein 4 OS=Homo sapiens OX=9606 GN=SH3BP4 PE=1 SV=1
436	TRUE	Q8N3R9|MPP5_HUMAN	47.07	21.19	10	10	Oxidation (M)	0	0	50.6685	0	62.1876	0	0	0	2386.54	2176.84	757.982	753.156	1803.64	1392.7	1853.63	1813.32	0.00:0.00:0.06:0.00:0.08:0.00:0.00:0.00:2.93:2.67:0.93:0.92:2.21:1.71:2.27:2.22	50.6685	62.1876	1518.63	1715.82	0.06:0.07:1.81:2.05	77294	MAGUK p55 subfamily member 5 OS=Homo sapiens OX=9606 GN=MPP5 PE=1 SV=3
123	TRUE	O95573|ACSL3_HUMAN	81.73	41.11	25	22	Carbamidomethylation; Oxidation (M)	502.868	510.09	541.395	571.725	748.734	653.375	1348.77	1263.83	24616.4	26752.7	8941.16	8775.95	22538.8	25561.4	18006.8	20607.6	0.05:0.05:0.05:0.06:0.07:0.06:0.13:0.12:2.43:2.64:0.88:0.87:2.23:2.53:1.78:2.04	586.197	1003.68	17455.9	21752.3	0.06:0.10:1.71:2.13	80420	Long-chain-fatty-acid--CoA ligase 3 OS=Homo sapiens OX=9606 GN=ACSL3 PE=1 SV=3
833	TRUE	P23508|CRCM_HUMAN	106.64	7	4	4		0	0	0	0	0	0	86.0166	60.6081	960.188	797.949	845.378	606.038	1120.75	606.941	1466.38	1630.03	0.00:0.00:0.00:0.00:0.00:0.00:0.17:0.12:1.88:1.56:1.65:1.19:2.19:1.19:2.87:3.19	0	73.3123	864.203	1206.02	0.00:0.14:1.61:2.25	93027	Colorectal mutant cancer protein OS=Homo sapiens OX=9606 GN=MCC PE=1 SV=2
449	TRUE	P84085|ARF5_HUMAN	89.97	31.67	7	4	Carbamidomethylation; Oxidation (M)	679.57	631.684	500.615	429.934	1060.13	1291.6	1405.5	1154.14	6258.74	8149.16	4453.59	5211.65	12427.9	8286.2	10645.6	7042.18	0.16:0.15:0.12:0.10:0.24:0.30:0.32:0.27:1.44:1.87:1.02:1.20:2.86:1.90:2.45:1.62	560.451	1259.76	6018.28	9600.46	0.13:0.29:1.38:2.20	20530	ADP-ribosylation factor 5 OS=Homo sapiens OX=9606 GN=ARF5 PE=1 SV=2
326	TRUE	P98172|EFNB1_HUMAN	58.03	34.68	12	11	Carbamidomethylation; Oxidation (M)	1195.02	1323.09	3373.59	2868.23	4899.83	5436.2	1822.55	1098.88	70497.2	71845.9	29453.2	30556.8	62033.8	37705.1	45098.5	37571.5	0.05:0.05:0.13:0.11:0.19:0.21:0.07:0.04:2.77:2.83:1.16:1.20:2.44:1.48:1.77:1.48	2189.98	3314.36	50588.3	45602.2	0.09:0.13:1.99:1.79	38007	Ephrin-B1 OS=Homo sapiens OX=9606 GN=EFNB1 PE=1 SV=1
419	TRUE	Q15084|PDIA6_HUMAN	78.42	33.41	10	10		612.941	478.505	1080.62	1202.81	793.356	806.63	1583.47	1855.69	17514.4	17689.7	9945.3	9556.31	28042.4	23555.8	26403.1	24494.2	0.06:0.05:0.10:0.12:0.08:0.08:0.15:0.18:1.69:1.71:0.96:0.92:2.71:2.28:2.55:2.37	843.72	1259.78	13676.4	25623.9	0.08:0.12:1.32:2.48	48121	Protein disulfide-isomerase A6 OS=Homo sapiens OX=9606 GN=PDIA6 PE=1 SV=1
1018	TRUE	Q9Y4D7|PLXD1_HUMAN	39.6	1.4	3	2		0	0	50.7888	56.5319	86.5726	153.458	52.2724	115.696	213.979	255.663	121.263	229.856	394.596	389.11	325.297	368.202	0.00:0.00:0.29:0.32:0.49:0.87:0.30:0.66:1.22:1.45:0.69:1.31:2.24:2.21:1.85:2.09	107.321	129.666	238.874	369.301	0.51:0.61:1.13:1.75	212007	Plexin-D1 OS=Homo sapiens OX=9606 GN=PLXND1 PE=1 SV=3
359	TRUE	Q96I99|SUCB2_HUMAN	54.28	30.32	11	11	Oxidation (M)	619.114	631.746	908.963	676.131	717.903	940.942	1035.79	1129.18	3662.8	4177.03	4855.92	3566.63	3347.55	1786.11	5315.88	5919.74	0.25:0.26:0.37:0.28:0.29:0.38:0.42:0.46:1.49:1.70:1.98:1.45:1.36:0.73:2.16:2.41	708.989	955.954	4065.6	4092.32	0.29:0.39:1.66:1.67	46511	Succinate--CoA ligase [GDP-forming] subunit beta, mitochondrial OS=Homo sapiens OX=9606 GN=SUCLG2 PE=1 SV=2
933	TRUE	Q8TB37|NUBPL_HUMAN	62.86	14.42	3	3		65.8961	68.3527	90.2898	126.847	76.7083	163.374	56.7345	0	597.744	457.34	544.858	545.134	705.467	824.41	1035.54	1212.61	0.16:0.17:0.22:0.31:0.19:0.40:0.14:0.00:1.46:1.11:1.33:1.33:1.72:2.01:2.52:2.95	133.692	135.191	696.35	1017.07	0.27:0.27:1.41:2.05	34083	Iron-sulfur protein NUBPL OS=Homo sapiens OX=9606 GN=NUBPL PE=1 SV=3
740	TRUE	Q8NB49|AT11C_HUMAN	57.21	5.65	5	5		84.0217	94.0274	164.526	187.683	237.723	182.054	146.174	133.745	1587.78	1601.88	960.154	863	489.037	1474.04	989.059	1171.49	0.13:0.15:0.25:0.29:0.37:0.28:0.23:0.21:2.45:2.47:1.48:1.33:0.75:2.28:1.53:1.81	132.565	214.536	1394.13	1030.91	0.19:0.31:2.01:1.49	129477	Phospholipid-transporting ATPase IG OS=Homo sapiens OX=9606 GN=ATP11C PE=1 SV=3
9	TRUE	P10586|PTPRF_HUMAN	80.45	51.28	93	84	Carbamidomethylation; Oxidation (M)	4089.18	3585.78	7084.78	6968.36	2797.11	4109.06	6728.02	6799.97	84513.8	86427.7	49663.6	50095.5	125293	88640.9	137349	136166	0.08:0.07:0.14:0.14:0.06:0.08:0.13:0.14:1.69:1.73:0.99:1.00:2.50:1.77:2.75:2.72	5446.16	5108.54	67675.1	121862	0.11:0.10:1.35:2.44	212879	Receptor-type tyrosine-protein phosphatase F OS=Homo sapiens OX=9606 GN=PTPRF PE=1 SV=2
510	TRUE	O15427|MOT4_HUMAN	31.48	17.85	6	6	Oxidation (M)	10415.3	10711.1	21002.9	22292.8	42715.1	34077.5	12875.4	10888.7	105107	106408	43663.4	44038.5	94257	68790.6	78641.6	69765.6	0.21:0.22:0.43:0.46:0.88:0.70:0.27:0.22:2.17:2.19:0.90:0.91:1.94:1.42:1.62:1.44	16105.5	25139.2	74804.1	77863.7	0.33:0.52:1.54:1.61	49469	Monocarboxylate transporter 4 OS=Homo sapiens OX=9606 GN=SLC16A3 PE=1 SV=1
427	TRUE	P18564|ITB6_HUMAN	30	12.31	7	7	Oxidation (M)	5390.89	5530.18	20956.9	21162.1	12898.6	14211.5	5052.26	4471.7	68390.6	68382.9	32761.2	30274.5	47004.3	32371.3	41486.9	43958.2	0.19:0.19:0.74:0.75:0.45:0.50:0.18:0.16:2.41:2.41:1.15:1.07:1.66:1.14:1.46:1.55	13260	9158.52	49952.3	41205.2	0.47:0.32:1.76:1.45	85936	Integrin beta-6 OS=Homo sapiens OX=9606 GN=ITGB6 PE=1 SV=2
642	TRUE	P62330|ARF6_HUMAN	35.36	38.86	5	5	Oxidation (M)	1915.48	2148.01	1489.44	1135.96	3248.3	2484.34	930.636	562.985	12428.7	12621.5	5265.86	4296.28	10155.8	7354.33	9704.2	9850.12	0.36:0.40:0.28:0.21:0.61:0.46:0.17:0.11:2.32:2.36:0.98:0.80:1.90:1.37:1.81:1.84	1672.22	1806.57	8653.08	9266.11	0.31:0.34:1.62:1.73	20082	ADP-ribosylation factor 6 OS=Homo sapiens OX=9606 GN=ARF6 PE=1 SV=2
943	TRUE	Q9NS86|LANC2_HUMAN	55.83	7.33	3	3	Oxidation (M)	253.893	455.554	541.87	398.181	780.567	473.633	405.196	495.874	1521.3	1577.19	1299.81	1563.24	2515.74	1373.3	2777.59	2472.67	0.21:0.39:0.46:0.34:0.66:0.40:0.34:0.42:1.29:1.33:1.10:1.32:2.13:1.16:2.35:2.09	412.375	538.817	1490.38	2284.83	0.35:0.46:1.26:1.93	50854	LanC-like protein 2 OS=Homo sapiens OX=9606 GN=LANCL2 PE=1 SV=1
160	TRUE	P23743|DGKA_HUMAN	65.57	34.69	20	20	Carbamidomethylation; Oxidation (M)	133.837	132.455	400.421	253.252	361.144	664.745	510.105	916.698	9454.56	9547.67	3072.1	3522.87	6331.66	5679.85	6468.75	8651.04	0.04:0.04:0.11:0.07:0.10:0.19:0.15:0.26:2.70:2.72:0.88:1.00:1.81:1.62:1.84:2.47	288.732	640.061	6399.3	6782.82	0.08:0.18:1.81:1.92	82630	Diacylglycerol kinase alpha OS=Homo sapiens OX=9606 GN=DGKA PE=1 SV=3
51	TRUE	P29317|EPHA2_HUMAN	55.81	37.81	38	35	Carbamidomethylation; Oxidation (M)	11142.8	12460.4	5503.79	5325.9	18174.5	18093.4	8133.76	6498.77	168029	177696	57812.7	59281.2	143380	105504	130541	123160	0.17:0.19:0.08:0.08:0.28:0.28:0.12:0.10:2.56:2.71:0.88:0.90:2.18:1.61:1.99:1.88	8608.24	12725.1	115705	125646	0.13:0.19:1.76:1.91	108266	Ephrin type-A receptor 2 OS=Homo sapiens OX=9606 GN=EPHA2 PE=1 SV=2
406	TRUE	P61204|ARF3_HUMAN	80.09	31.49	7	4	Oxidation (M)	1846.89	2017.99	4193.62	3854.24	7930.91	8655.92	6436.08	6237.12	34557.4	26874.6	25169.8	24438.1	57881.2	37289.6	51134.3	57120.6	0.08:0.09:0.19:0.17:0.36:0.39:0.29:0.28:1.55:1.21:1.13:1.10:2.60:1.68:2.30:2.57	2978.19	7315.01	27760	50856.4	0.13:0.33:1.25:2.29	20601	ADP-ribosylation factor 3 OS=Homo sapiens OX=9606 GN=ARF3 PE=1 SV=2
406	TRUE	P84077|ARF1_HUMAN	80.09	31.49	7	4	Oxidation (M)	1846.89	2017.99	4193.62	3854.24	7930.91	8655.92	6436.08	6237.12	34557.4	26874.6	25169.8	24438.1	57881.2	37289.6	51134.3	57120.6	0.08:0.09:0.19:0.17:0.36:0.39:0.29:0.28:1.55:1.21:1.13:1.10:2.60:1.68:2.30:2.57	2978.19	7315.01	27760	50856.4	0.13:0.33:1.25:2.29	20697	ADP-ribosylation factor 1 OS=Homo sapiens OX=9606 GN=ARF1 PE=1 SV=2
424	TRUE	O75955|FLOT1_HUMAN	41.18	26.93	9	9	Oxidation (M)	328.075	141.867	555.893	555.676	334.517	747.336	465.698	753.44	2048.66	1972.78	3478.95	3340.93	3737.41	1350.14	1875.95	3111.65	0.21:0.09:0.36:0.36:0.22:0.48:0.30:0.49:1.32:1.27:2.24:2.16:2.41:0.87:1.21:2.01	460.806	663.404	2710.33	2604.01	0.29:0.41:1.68:1.62	47355	Flotillin-1 OS=Homo sapiens OX=9606 GN=FLOT1 PE=1 SV=3
456	TRUE	O95235|KI20A_HUMAN	130.64	11.12	8	8	Oxidation (M)	0	0	0	0	60.142	122.926	51.6064	115.676	2989.37	4073.9	2212.81	2395.18	6230.2	6592.95	4538.53	3709.72	0.00:0.00:0.00:0.00:0.03:0.06:0.02:0.06:1.45:1.97:1.07:1.16:3.01:3.19:2.19:1.79	0	169.18	3469.55	5267.85	0.00:0.08:1.56:2.37	100278	Kinesin-like protein KIF20A OS=Homo sapiens OX=9606 GN=KIF20A PE=1 SV=1
528	TRUE	Q9UPT5|EXOC7_HUMAN	58.64	10.48	6	6	Oxidation (M)	161.049	149.192	235.847	175.277	162.312	187.888	474.985	312.462	1488.8	1524.89	1053.86	957.033	1921.48	1004.85	2553.72	1756.5	0.18:0.17:0.27:0.20:0.18:0.21:0.54:0.35:1.69:1.73:1.19:1.08:2.18:1.14:2.89:1.99	180.341	379.411	1337.53	1809.14	0.19:0.41:1.44:1.95	83382	Exocyst complex component 7 OS=Homo sapiens OX=9606 GN=EXOC7 PE=1 SV=3
887	TRUE	Q14451|GRB7_HUMAN	69.54	7.52	3	3		250.82	130.491	333.795	352.528	196.834	205.05	248.148	166.858	4881.36	4695.59	2174.19	1980.12	1912.21	2483.82	3156.83	3560.32	0.15:0.08:0.20:0.21:0.12:0.12:0.15:0.10:2.92:2.81:1.30:1.19:1.14:1.49:1.89:2.13	266.908	255.339	3631	2778.29	0.15:0.15:2.10:1.60	59681	Growth factor receptor-bound protein 7 OS=Homo sapiens OX=9606 GN=GRB7 PE=1 SV=2
125	TRUE	P50851|LRBA_HUMAN	48.34	10.58	24	24	Carbamidomethylation; Oxidation (M)	0	50.4934	217.899	211.302	74.1521	215.487	432.434	365.777	6092.84	6439.07	2770.86	2109.71	6050.94	2841.14	3819.31	4326.55	0.00:0.02:0.10:0.09:0.03:0.10:0.19:0.16:2.71:2.86:1.23:0.94:2.69:1.26:1.70:1.92	199.648	320.974	4353.12	4259.48	0.09:0.14:1.91:1.87	319108	Lipopolysaccharide-responsive and beige-like anchor protein OS=Homo sapiens OX=9606 GN=LRBA PE=1 SV=4
64	TRUE	P16615|AT2A2_HUMAN	50.52	34.45	35	35	Carbamidomethylation; Oxidation (M)	2945.18	3198.01	7663.83	6594.29	3711.54	9477.09	9661.19	11767.4	62946.7	74479.7	24541.5	26200.3	74151.8	47422.9	66776.9	71430.5	0.09:0.10:0.24:0.21:0.12:0.30:0.31:0.37:2.00:2.37:0.78:0.83:2.36:1.51:2.12:2.27	5100.33	8654.3	47042	64945.5	0.16:0.28:1.50:2.07	114757	Sarcoplasmic/endoplasmic reticulum calcium ATPase 2 OS=Homo sapiens OX=9606 GN=ATP2A2 PE=1 SV=1
551	TRUE	Q00325|MPCP_HUMAN	99.84	17.4	5	5	Carbamidomethylation	249.885	309.886	332.135	385.34	641.846	541.75	646.443	529.525	57036.3	53833.9	18029.8	18343.9	34314	29591.8	33106.7	35699.8	0.02:0.02:0.02:0.02:0.04:0.03:0.04:0.03:3.22:3.04:1.02:1.03:1.94:1.67:1.87:2.01	342.259	589.891	36811	33178.1	0.02:0.03:2.08:1.87	40095	Phosphate carrier protein, mitochondrial OS=Homo sapiens OX=9606 GN=SLC25A3 PE=1 SV=2
82	TRUE	P12830|CADH1_HUMAN	89.52	36.17	29	28	Carbamidomethylation; Oxidation (M)	1816.78	4133.36	4121.28	3106.89	6313.22	11143.1	3255.35	4100.55	294807	287851	140364	138798	518794	339390	326536	383762	0.02:0.03:0.03:0.02:0.04:0.07:0.02:0.03:1.91:1.87:0.91:0.90:3.36:2.20:2.12:2.49	3294.58	6203.06	215455	392120	0.02:0.04:1.40:2.54	97456	Cadherin-1 OS=Homo sapiens OX=9606 GN=CDH1 PE=1 SV=3
76	TRUE	P14625|ENPL_HUMAN	81.23	39.1	28	27	Carbamidomethylation; Oxidation (M)	1233.17	1072.24	2394.81	1907.55	1806.66	1854.87	2285.57	2200.66	90959.1	72355.9	28437.8	32032	62670.3	36600.1	50408.4	74623.6	0.04:0.04:0.08:0.07:0.06:0.06:0.08:0.08:3.14:2.50:0.98:1.11:2.17:1.27:1.74:2.58	1701.79	2036.94	57406.8	56594.2	0.06:0.07:1.95:1.92	92469	Endoplasmin OS=Homo sapiens OX=9606 GN=HSP90B1 PE=1 SV=1
103	TRUE	P22223|CADH3_HUMAN	51.24	34.74	24	23	Oxidation (M)	8684.57	7802.23	9133.6	8585.42	9639.45	13341.6	5118.37	5511.52	69804.2	72269.5	26636.7	27311.9	68419.9	52828.5	42506.1	50322.1	0.29:0.26:0.31:0.29:0.32:0.45:0.17:0.18:2.34:2.42:0.89:0.91:2.29:1.77:1.42:1.68	8551.45	8402.75	49005.6	53519.2	0.29:0.28:1.64:1.79	91418	Cadherin-3 OS=Homo sapiens OX=9606 GN=CDH3 PE=1 SV=2
614	TRUE	Q6P9F7|LRC8B_HUMAN	53.63	7.1	4	4	Carbamidomethylation	59.2944	0	157.676	163.922	91.3355	153.861	146.733	137.348	1664.12	1580.02	960.11	813.855	1796.9	700.292	1309.81	2276.76	0.08:0.00:0.21:0.22:0.12:0.20:0.20:0.18:2.22:2.10:1.28:1.08:2.39:0.93:1.74:3.03	161.47	150.134	1394.68	1556.84	0.20:0.18:1.71:1.91	92390	Volume-regulated anion channel subunit LRRC8B OS=Homo sapiens OX=9606 GN=LRRC8B PE=1 SV=2
148	TRUE	P16070|CD44_HUMAN	67.58	19	21	21	Carbamidomethylation; Oxidation (M)	37520.5	39466.7	86952.4	85692.8	16298.6	19303.2	5392.9	4831.88	922710	911266	391801	406048	613391	500404	401156	387643	0.12:0.13:0.29:0.28:0.05:0.06:0.02:0.02:3.06:3.02:1.30:1.35:2.03:1.66:1.33:1.28	62408.1	11456.6	657956	475649	0.21:0.04:2.18:1.58	81538	CD44 antigen OS=Homo sapiens OX=9606 GN=CD44 PE=1 SV=3
264	TRUE	Q9Y5Y6|ST14_HUMAN	75.02	21.4	15	15	Carbamidomethylation	3330.13	3414.16	1843.56	2010.26	3353.96	4300.34	2066.61	4585	31921.9	31877.9	18083.2	16927.7	42363.2	35098.8	54257.2	51840.1	0.17:0.18:0.10:0.10:0.17:0.22:0.11:0.24:1.66:1.66:0.94:0.88:2.21:1.83:2.83:2.70	2649.53	3576.48	25497	46473.6	0.14:0.18:1.30:2.38	94770	Suppressor of tumorigenicity 14 protein OS=Homo sapiens OX=9606 GN=ST14 PE=1 SV=2
1063	TRUE	Q00535|CDK5_HUMAN	114.85	11.99	3	3	Oxidation (M)	0	0	0	0	0	0	0	0	308.668	387.928	380.239	395.006	86.4785	154.394	405.281	210.554	0.00:0.00:0.00:0.00:0.00:0.00:0.00:0.00:2.12:2.67:2.61:2.71:0.59:1.06:2.78:1.45	0	0	502.443	324.725	0.00:0.00:2.43:1.57	33304	Cyclin-dependent-like kinase 5 OS=Homo sapiens OX=9606 GN=CDK5 PE=1 SV=3
218	TRUE	Q99569|PKP4_HUMAN	64.19	14.93	14	14		211.133	212.122	184.236	164.362	340.809	315.077	239.996	205.609	2826.83	2197.24	3501.16	883.774	2594.67	1965.6	1570.96	1621.18	0.18:0.18:0.15:0.14:0.29:0.26:0.20:0.17:2.38:1.85:2.94:0.74:2.18:1.65:1.32:1.36	192.963	324.459	2352.25	1938.1	0.16:0.27:1.96:1.61	131868	Plakophilin-4 OS=Homo sapiens OX=9606 GN=PKP4 PE=1 SV=2
788	TRUE	Q9Y287|ITM2B_HUMAN	21.15	12.03	4	4		265.872	261.484	1951.08	1657.13	1018.71	755.107	552.472	447.27	3647.18	4387.16	1968.87	1997.31	3335.73	1925.36	2406.88	2728.6	0.15:0.14:1.07:0.90:0.56:0.41:0.30:0.24:1.99:2.40:1.07:1.09:1.82:1.05:1.31:1.49	1158.8	746.814	3130.69	2726.58	0.60:0.38:1.61:1.40	30338	Integral membrane protein 2B OS=Homo sapiens OX=9606 GN=ITM2B PE=1 SV=1
1023	TRUE	Q14289|FAK2_HUMAN	92.5	4.26	3	3		0	0	0	0	0	0	87.4892	71.6151	1156.75	686.338	292.474	330.45	876.141	852.308	824.045	1158.36	0.00:0.00:0.00:0.00:0.00:0.00:0.22:0.18:2.92:1.73:0.74:0.83:2.21:2.15:2.08:2.93	0	79.5522	771.79	976.48	0.00:0.17:1.69:2.14	115875	Protein-tyrosine kinase 2-beta OS=Homo sapiens OX=9606 GN=PTK2B PE=1 SV=2
809	TRUE	Q8WWI1|LMO7_HUMAN	87.09	3.68	5	5	Oxidation (M)	0	0	0	0	0	0	121.551	237.954	1272.51	1440.9	523.521	612.52	1586.48	487.476	1315.45	1476.97	0.00:0.00:0.00:0.00:0.00:0.00:0.21:0.42:2.24:2.54:0.92:1.08:2.80:0.86:2.32:2.60	0	225.409	1025.35	1216.59	0.00:0.37:1.66:1.97	192696	LIM domain only protein 7 OS=Homo sapiens OX=9606 GN=LMO7 PE=1 SV=3
529	TRUE	P42566|EPS15_HUMAN	51.64	8.15	6	6		280.783	309.206	487.45	481.778	579.404	506.456	936.213	598.339	3090.17	1810.35	1181.77	1067.06	2891.97	2600.82	2335.84	2440.45	0.21:0.23:0.36:0.36:0.43:0.38:0.69:0.44:2.29:1.34:0.88:0.79:2.14:1.93:1.73:1.81	410.235	655.103	1787.34	2567.27	0.30:0.48:1.32:1.89	98656	Epidermal growth factor receptor substrate 15 OS=Homo sapiens OX=9606 GN=EPS15 PE=1 SV=2
704	TRUE	P29353|SHC1_HUMAN	45.9	15.27	5	5	Oxidation (M)	475.212	448.432	394.249	410.111	558.783	560.602	563.185	586.531	737.317	1302.77	1124.99	1467.76	1754.08	1368.06	1070.75	909.865	0.55:0.52:0.46:0.48:0.65:0.65:0.66:0.68:0.86:1.52:1.31:1.71:2.04:1.59:1.25:1.06	432.001	567.275	1158.21	1275.69	0.50:0.66:1.35:1.49	62822	SHC-transforming protein 1 OS=Homo sapiens OX=9606 GN=SHC1 PE=1 SV=4
762	TRUE	P67870|CSK2B_HUMAN	73.52	26.98	5	5	Carbamidomethylation; Oxidation (M)	1636.01	1390.12	2104.11	1985.69	1569.56	2205.91	954.019	1218.8	49644.3	49363.5	15088.9	15741.8	49541.3	30542.6	51227	53452.2	0.08:0.07:0.10:0.10:0.08:0.11:0.05:0.06:2.42:2.41:0.74:0.77:2.42:1.49:2.50:2.61	1848.43	1487.07	32459.6	46190.8	0.09:0.07:1.58:2.25	24942	Casein kinase II subunit beta OS=Homo sapiens OX=9606 GN=CSNK2B PE=1 SV=1
325	TRUE	Q8IUD2|RB6I2_HUMAN	49.73	8.78	9	9	Oxidation (M)	122.742	142.566	265.835	256.537	152.112	442.318	2925.72	691.711	7368.98	7934.18	4706.16	4786.65	14065.6	6806.24	10772.3	5236.68	0.03:0.03:0.06:0.06:0.04:0.11:0.70:0.17:1.77:1.90:1.13:1.15:3.38:1.63:2.58:1.26	237.88	1336.98	6198.99	9220.22	0.06:0.31:1.46:2.17	128086	ELKS/Rab6-interacting/CAST family member 1 OS=Homo sapiens OX=9606 GN=ERC1 PE=1 SV=1
73	TRUE	O60716|CTND1_HUMAN	47.8	47.21	36	36	Carbamidomethylation; Oxidation (M)	2949.8	2991.8	5813.27	6005.39	4901.78	4948.45	1327.88	1493.69	45988.5	43371.5	13415.6	14350.3	45481.6	37465.7	50983.8	43448.6	0.15:0.15:0.29:0.30:0.24:0.24:0.07:0.07:2.26:2.14:0.66:0.71:2.24:1.84:2.51:2.14	4440.07	3167.95	29456.7	44344.9	0.22:0.16:1.45:2.18	108170	Catenin delta-1 OS=Homo sapiens OX=9606 GN=CTNND1 PE=1 SV=1
240	TRUE	P48634|PRC2A_HUMAN	51.39	8.25	14	14		325.178	344.932	496.444	610.878	581.178	758.097	477.564	1411.71	6568.99	6708.54	2011.82	2032.18	6696.07	5328.33	4822	5278.07	0.12:0.12:0.18:0.22:0.21:0.27:0.17:0.51:2.36:2.41:0.72:0.73:2.41:1.92:1.74:1.90	490.978	807.139	4330.38	5531.11	0.18:0.29:1.55:1.98	228863	Protein PRRC2A OS=Homo sapiens OX=9606 GN=PRRC2A PE=1 SV=3
97	TRUE	P00533|EGFR_HUMAN	73.38	26.36	28	26	Carbamidomethylation; Oxidation (M)	1428.62	1831.03	2139.67	2692.5	4294.75	5327.44	2437.55	2436.85	78287.8	101694	28751.5	33287.7	51735	49912	47589.2	72888.2	0.05:0.06:0.07:0.09:0.14:0.18:0.08:0.08:2.57:3.34:0.95:1.09:1.70:1.64:1.56:2.40	2022.96	3624.15	60505.3	55531.1	0.07:0.12:1.99:1.83	134277	Epidermal growth factor receptor OS=Homo sapiens OX=9606 GN=EGFR PE=1 SV=2
63	TRUE	Q9BSJ8|ESYT1_HUMAN	72.26	39.13	37	37	Carbamidomethylation; Oxidation (M)	634.009	632.358	1041.99	939.825	700.785	917.382	1419.11	1452.11	40348.4	38813.7	11640	9652.05	34907	23153.3	37475	36785.2	0.04:0.04:0.07:0.06:0.05:0.06:0.09:0.10:2.68:2.58:0.77:0.64:2.32:1.54:2.49:2.45	885.385	1236.04	25113.5	33080.2	0.06:0.08:1.67:2.19	122856	Extended synaptotagmin-1 OS=Homo sapiens OX=9606 GN=ESYT1 PE=1 SV=1
71	TRUE	Q9NZB2|F120A_HUMAN	82.35	41.14	33	33	Carbamidomethylation; Oxidation (M)	592.674	688.23	861.638	964.784	601.018	525.977	793.736	752.033	41469.8	41884.7	13408.4	12586.9	31125.7	16966	27047.9	29226.2	0.04:0.05:0.06:0.07:0.04:0.04:0.06:0.05:3.02:3.05:0.98:0.92:2.27:1.24:1.97:2.13	816.099	707.205	27337.5	26091.5	0.06:0.05:1.99:1.90	121888	Constitutive coactivator of PPAR-gamma-like protein 1 OS=Homo sapiens OX=9606 GN=FAM120A PE=1 SV=2
237	TRUE	Q96J84|KIRR1_HUMAN	55.85	24.97	14	14	Oxidation (M)	713.01	758.719	684.022	668.65	979.439	984.811	512.639	459.888	7942.6	5027.1	2594.79	2700.22	6086.08	3569.12	6737.63	6230.78	0.24:0.26:0.23:0.23:0.34:0.34:0.18:0.16:2.72:1.72:0.89:0.93:2.09:1.22:2.31:2.14	706.1	734.194	4566.18	5655.9	0.24:0.25:1.57:1.94	83536	Kin of IRRE-like protein 1 OS=Homo sapiens OX=9606 GN=KIRREL1 PE=1 SV=2
944	TRUE	P98196|AT11A_HUMAN	38.65	5.29	4	4		0	0	71.3314	78.0501	161.375	198.56	137.15	140.619	606.702	615.036	205.804	236.937	634.883	477.628	770.399	686.84	0.00:0.00:0.23:0.25:0.51:0.63:0.44:0.45:1.93:1.96:0.66:0.75:2.02:1.52:2.45:2.19	74.6908	159.426	416.12	642.438	0.23:0.49:1.29:1.99	129756	Probable phospholipid-transporting ATPase IH OS=Homo sapiens OX=9606 GN=ATP11A PE=1 SV=3
592	TRUE	Q8WWN8|ARAP3_HUMAN	51.65	5.96	7	7	Oxidation (M)	74.1233	89.3009	92.7224	60.5217	51.9656	96.6251	0	0	1656.94	1995.54	540.8	481.32	974.829	1455.18	1443.93	1241.7	0.12:0.14:0.14:0.09:0.08:0.15:0.00:0.00:2.59:3.11:0.84:0.75:1.52:2.27:2.25:1.94	79.1671	74.2954	1168.65	1278.91	0.12:0.11:1.80:1.97	169844	Arf-GAP with Rho-GAP domain, ANK repeat and PH domain-containing protein 3 OS=Homo sapiens OX=9606 GN=ARAP3 PE=1 SV=1
131	TRUE	Q9UJS0|CMC2_HUMAN	76.09	48.15	25	25	Carbamidomethylation; Oxidation (M)	472.861	489.924	711.699	644.326	657.526	869.766	934.359	931.706	20573.5	19311.7	6115.73	6474.1	23374.7	12375.7	23209.4	21461.7	0.05:0.06:0.08:0.07:0.08:0.10:0.11:0.11:2.37:2.23:0.71:0.75:2.70:1.43:2.68:2.48	579.702	848.339	13118.8	20105.4	0.07:0.10:1.51:2.32	74176	Calcium-binding mitochondrial carrier protein Aralar2 OS=Homo sapiens OX=9606 GN=SLC25A13 PE=1 SV=2
329	TRUE	Q9C0B5|ZDHC5_HUMAN	34.1	29.51	13	13	Oxidation (M)	265.399	369.451	987.415	1100.91	6926.78	1358.88	682.28	1060.19	11203.9	11185.6	4169.24	3295.34	7517.37	8037.97	12829.8	10896.5	0.05:0.07:0.19:0.22:1.35:0.27:0.13:0.21:2.19:2.19:0.81:0.64:1.47:1.57:2.51:2.13	763.507	2507.03	7463.52	9820.42	0.15:0.49:1.45:1.91	77545	Palmitoyltransferase ZDHHC5 OS=Homo sapiens OX=9606 GN=ZDHHC5 PE=1 SV=2
1151	TRUE	Q9UEY8|ADDG_HUMAN	37.39	2.83	2	2	Oxidation (M)	0	0	57.8609	0	126.8	89.6825	0	70.0703	694.085	467.724	150.724	205.905	617.671	451.703	393.977	578.79	0.00:0.00:0.24:0.00:0.52:0.37:0.00:0.29:2.84:1.92:0.62:0.84:2.53:1.85:1.61:2.37	57.8609	130.144	379.61	510.535	0.21:0.48:1.41:1.89	79155	Gamma-adducin OS=Homo sapiens OX=9606 GN=ADD3 PE=1 SV=1
1191	TRUE	O75935|DCTN3_HUMAN	81.32	10.75	2	2		0	0	0	0	0	0	61.2291	51.8768	623.867	330.252	166.102	470.601	302.199	400.809	139.014	409.265	0.00:0.00:0.00:0.00:0.00:0.00:0.33:0.28:3.38:1.79:0.90:2.55:1.64:2.17:0.75:2.22	0	56.5529	631.676	404.775	0.00:0.21:2.31:1.48	21119	Dynactin subunit 3 OS=Homo sapiens OX=9606 GN=DCTN3 PE=1 SV=1
652	TRUE	Q9UNN8|EPCR_HUMAN	73.69	20.59	4	4	Carbamidomethylation; Oxidation (M)	3672.41	3909.36	2966.24	3781.15	3360.12	4198.24	2461.4	3742.13	130262	132267	36893.3	35365.5	99409.7	89775.8	62879.7	101149	0.08:0.09:0.07:0.08:0.08:0.09:0.05:0.08:2.91:2.96:0.82:0.79:2.22:2.01:1.40:2.26	3625.51	3488.1	83697	88303.5	0.08:0.08:1.87:1.97	26671	Endothelial protein C receptor OS=Homo sapiens OX=9606 GN=PROCR PE=1 SV=1
967	TRUE	Q8IZ07|AN13A_HUMAN	33.78	6.44	3	3		0	0	111.193	94.1938	164.209	132.662	105.58	131.455	728.005	710.769	261.847	205.584	825.924	529.487	535.495	589.998	0.00:0.00:0.35:0.29:0.51:0.41:0.33:0.41:2.27:2.22:0.82:0.64:2.58:1.65:1.67:1.84	102.693	178.782	476.551	620.226	0.30:0.52:1.38:1.80	67619	Ankyrin repeat domain-containing protein 13A OS=Homo sapiens OX=9606 GN=ANKRD13A PE=1 SV=3
607	TRUE	Q8N5I2|ARRD1_HUMAN	22.84	31.64	8	8		15925.1	16550.4	14656.6	12235.8	17912.6	21937.7	6193.31	7267.22	6833.04	6522.37	810.868	947.392	3746.33	2065.2	2754.13	3909.21	1.82:1.89:1.67:1.40:2.04:2.50:0.71:0.83:0.78:0.74:0.09:0.11:0.43:0.24:0.31:0.45	14842	13327.7	3778.42	3118.72	1.69:1.52:0.43:0.36	45981	Arrestin domain-containing protein 1 OS=Homo sapiens OX=9606 GN=ARRDC1 PE=1 SV=1
31	TRUE	P13639|EF2_HUMAN	24.36	49.65	49	49	Carbamidomethylation; Oxidation (M)	2865.26	2630.23	12655	11517.2	4513.29	5412.76	34123.1	34442	82265.8	80740.5	31513.8	29460.4	58549.9	40120.6	49623.4	60005	0.08:0.08:0.37:0.34:0.13:0.16:1.01:1.02:2.44:2.39:0.93:0.87:1.73:1.19:1.47:1.78	7416.91	19622.8	55995.1	52074.7	0.22:0.58:1.66:1.54	95338	Elongation factor 2 OS=Homo sapiens OX=9606 GN=EEF2 PE=1 SV=4
124	TRUE	Q99959|PKP2_HUMAN	75.47	32.8	22	22	Carbamidomethylation; Oxidation (M)	297.931	287.546	662.659	539.362	595.574	1021.29	900.564	503.966	28426.4	28195	9443.56	9805.35	19333.6	11116	13739	17375.9	0.03:0.03:0.07:0.06:0.07:0.11:0.10:0.06:3.20:3.17:1.06:1.10:2.17:1.25:1.55:1.95	498.534	755.348	18967.6	15391.1	0.06:0.08:2.13:1.73	97415	Plakophilin-2 OS=Homo sapiens OX=9606 GN=PKP2 PE=1 SV=2
361	TRUE	P49023|PAXI_HUMAN	59.86	24.2	10	10	Carbamidomethylation; Oxidation (M)	1452.3	1705.46	1936.47	1605.02	1859.29	2330.56	2353.88	2052.51	9840.85	7939.7	4861.23	4116.49	12469.5	6733.11	10158.8	11718	0.28:0.33:0.37:0.31:0.36:0.45:0.45:0.40:1.89:1.53:0.94:0.79:2.40:1.30:1.96:2.26	1725.56	2176.08	6689.57	10269.8	0.33:0.42:1.28:1.97	64505	Paxillin OS=Homo sapiens OX=9606 GN=PXN PE=1 SV=3
521	TRUE	Q9NYQ6|CELR1_HUMAN	43.78	3.42	8	7	Oxidation (M)	467.192	498.286	903.127	995.606	644.063	729.888	752.254	660.963	2810.77	3057.72	1002.84	1738.06	3017.84	2912.46	2972.88	4218.84	0.27:0.29:0.53:0.58:0.38:0.43:0.44:0.39:1.64:1.79:0.59:1.02:1.76:1.70:1.74:2.47	790.335	696.792	2152.35	3280.51	0.46:0.40:1.24:1.90	329486	Cadherin EGF LAG seven-pass G-type receptor 1 OS=Homo sapiens OX=9606 GN=CELSR1 PE=1 SV=1
629	TRUE	O60353|FZD6_HUMAN	68.28	7.08	4	4	Carbamidomethylation; Oxidation (M)	123.748	157.266	220.353	203.755	500.82	536.63	231.572	187.968	5577.43	4323.85	1794.67	1875.53	5923.92	5554.54	4313.16	7860.35	0.05:0.06:0.09:0.08:0.20:0.22:0.09:0.08:2.27:1.76:0.73:0.76:2.41:2.26:1.75:3.19	247.19	457.231	3392.87	5912.99	0.10:0.18:1.36:2.36	79292	Frizzled-6 OS=Homo sapiens OX=9606 GN=FZD6 PE=1 SV=2
1027	TRUE	O43663|PRC1_HUMAN	45.92	6.45	3	3	Oxidation (M)	0	0	0	55.5853	52.7569	54.2695	74.1321	77.2639	662.348	676.41	258.078	240.017	1088.04	663.084	931.721	778.02	0.00:0.00:0.00:0.16:0.15:0.15:0.21:0.22:1.89:1.93:0.74:0.68:3.10:1.89:2.66:2.22	55.5853	64.6056	459.213	865.216	0.15:0.18:1.27:2.40	71607	Protein regulator of cytokinesis 1 OS=Homo sapiens OX=9606 GN=PRC1 PE=1 SV=2
62	TRUE	Q9UIW2|PLXA1_HUMAN	39.73	21.99	37	26	Carbamidomethylation; Oxidation (M)	1700.06	1965	713.657	1552.98	1262.08	2721.05	558.964	2109.52	15743.1	16414.5	6070.54	5910.68	10250.6	5896.04	12224.7	12590.8	0.28:0.32:0.12:0.25:0.21:0.45:0.09:0.35:2.58:2.69:0.99:0.97:1.68:0.97:2.00:2.06	1482.93	1662.9	11034.7	10240.6	0.24:0.27:1.81:1.68	211067	Plexin-A1 OS=Homo sapiens OX=9606 GN=PLXNA1 PE=1 SV=3
448	TRUE	Q9NZ08|ERAP1_HUMAN	39.53	6.91	5	5	Oxidation (M)	0	0	80.6807	84.0759	0	0	90.7588	58.7155	1023.34	952.88	397.951	320.382	1560.68	770.43	1113.36	1254.03	0.00:0.00:0.17:0.17:0.00:0.00:0.19:0.12:2.12:1.98:0.83:0.67:3.24:1.60:2.31:2.60	82.3783	74.7372	824.503	1174.62	0.15:0.14:1.53:2.18	107235	Endoplasmic reticulum aminopeptidase 1 OS=Homo sapiens OX=9606 GN=ERAP1 PE=1 SV=3
272	TRUE	Q9NPH3|IL1AP_HUMAN	81.63	31.05	15	15	Oxidation (M)	433.885	441.489	778.104	761.343	452.799	562.365	758.929	389.992	7822.21	6840.82	5799.3	4185.93	16353	11128.4	10910.8	7211.82	0.09:0.09:0.17:0.16:0.10:0.12:0.16:0.08:1.67:1.46:1.24:0.90:3.50:2.38:2.33:1.54	603.705	541.021	6162.07	11401	0.13:0.12:1.32:2.44	65418	Interleukin-1 receptor accessory protein OS=Homo sapiens OX=9606 GN=IL1RAP PE=1 SV=2
122	TRUE	P52597|HNRPF_HUMAN	75.09	54.46	20	20	Acetylation (N-term); Carbamidomethylation; Oxidation (M)	2672.32	2523.35	3544.91	5668.31	1316.29	2089.6	2139.17	5290.86	318015	320490	81201.7	82319.1	249083	156600	249741	327937	0.02:0.02:0.03:0.05:0.02:0.02:0.02:0.05:2.81:2.83:0.72:0.73:2.20:1.38:2.21:2.90	3602.22	2708.98	200506	245840	0.03:0.02:1.77:2.17	45672	Heterogeneous nuclear ribonucleoprotein F OS=Homo sapiens OX=9606 GN=HNRNPF PE=1 SV=3
483	TRUE	O00560|SDCB1_HUMAN	50.69	52.01	8	8	Carbamidomethylation; Oxidation (M)	8109.12	7948.47	12318.2	12108.1	9328.95	11837.5	3458.96	3402.43	1190.12	846.139	527.268	448.909	1699.18	678.049	1399.42	1594.35	1.69:1.65:2.56:2.52:1.94:2.46:0.72:0.71:0.25:0.18:0.11:0.09:0.35:0.14:0.29:0.33	10121	7006.96	786.49	1359.97	2.10:1.45:0.16:0.28	32444	Syntenin-1 OS=Homo sapiens OX=9606 GN=SDCBP PE=1 SV=1
476	TRUE	Q12797|ASPH_HUMAN	63.38	18.07	7	7	Oxidation (M)	425.064	476.266	451.143	474.721	442.423	508.598	576.477	474.365	3892.79	4260.07	2507.83	2517.28	2424.73	1811.72	4021.24	6142.71	0.22:0.24:0.23:0.24:0.23:0.26:0.29:0.24:1.98:2.17:1.28:1.28:1.24:0.92:2.05:3.13	456.798	540.936	3294.49	3600.1	0.23:0.27:1.67:1.82	85863	Aspartyl/asparaginyl beta-hydroxylase OS=Homo sapiens OX=9606 GN=ASPH PE=1 SV=3
138	TRUE	Q15262|PTPRK_HUMAN	53.59	20.5	22	22	Carbamidomethylation; Oxidation (M)	2989.04	3458.6	11049.5	11565.8	2325.95	3389.09	21601.6	19656	599122	578508	177882	184280	342647	219601	354345	387731	0.02:0.02:0.06:0.06:0.02:0.02:0.12:0.11:3.28:3.17:0.97:1.01:1.88:1.20:1.94:2.12	7336.73	11795.1	384948	326081	0.04:0.06:2.11:1.79	162102	Receptor-type tyrosine-protein phosphatase kappa OS=Homo sapiens OX=9606 GN=PTPRK PE=1 SV=2
514	TRUE	P20340|RAB6A_HUMAN	62.46	34.13	6	6	Acetylation (N-term); Oxidation (M)	2289.11	1206.51	1881.41	2624.58	2492.82	2908.15	2335.44	3106.96	19214.9	17648.7	10872.2	11235.4	20149	10295	23703	32552.6	0.22:0.12:0.18:0.26:0.24:0.28:0.23:0.30:1.87:1.72:1.06:1.09:1.96:1.00:2.31:3.17	2000.41	2710.84	14742.8	21674.9	0.19:0.26:1.43:2.11	23593	Ras-related protein Rab-6A OS=Homo sapiens OX=9606 GN=RAB6A PE=1 SV=3
469	TRUE	O43278|SPIT1_HUMAN	86.19	17.39	10	10	Carbamidomethylation; Oxidation (M)	518.688	558.747	804.454	770.33	1376.92	1535.45	1077.42	930.28	29496.7	31480	10697.8	10387.7	50404.5	31492.4	42787.1	41607.3	0.03:0.03:0.05:0.05:0.09:0.10:0.07:0.06:1.84:1.97:0.67:0.65:3.15:1.97:2.67:2.60	705.83	1279.16	20515.6	41572.8	0.04:0.08:1.28:2.60	58398	Kunitz-type protease inhibitor 1 OS=Homo sapiens OX=9606 GN=SPINT1 PE=1 SV=2
665	TRUE	Q8IYI6|EXOC8_HUMAN	59.37	12	7	7		180.114	98.6358	0	0	311.057	441.336	279.096	228.916	2835.28	2592.5	5033.55	3256.82	2426.13	1001.69	1679.02	2279.23	0.13:0.07:0.00:0.00:0.22:0.31:0.20:0.16:2.00:1.83:3.56:2.30:1.71:0.71:1.19:1.61	139.375	315.101	3429.54	1846.52	0.10:0.22:2.39:1.29	81799	Exocyst complex component 8 OS=Homo sapiens OX=9606 GN=EXOC8 PE=1 SV=2
65	TRUE	Q9UMD9|COHA1_HUMAN	70.2	21.38	34	34	Carbamidomethylation; Oxidation (M)	3165.18	2938.01	2740.43	2317.16	4274.65	5867.47	17345.7	2862.39	129919	114952	51415.6	43061.6	224479	158995	157307	174270	0.05:0.04:0.04:0.03:0.06:0.09:0.25:0.04:1.90:1.68:0.75:0.63:3.28:2.32:2.30:2.54	2790.2	7587.55	84837.1	178763	0.04:0.11:1.24:2.61	150419	Collagen alpha-1(XVII) chain OS=Homo sapiens OX=9606 GN=COL17A1 PE=1 SV=3
251	TRUE	P07384|CAN1_HUMAN	42.24	25.77	15	15	Oxidation (M)	1048.48	1074.34	861.599	1484.49	833.241	921.333	2883.73	2836.56	15426.4	15167.6	3646.69	3939.7	14922.5	11363.7	14258.8	14113.7	0.16:0.16:0.13:0.23:0.13:0.14:0.44:0.43:2.36:2.32:0.56:0.60:2.28:1.74:2.18:2.16	1117.23	1868.72	9545.1	13664.7	0.17:0.29:1.46:2.09	81890	Calpain-1 catalytic subunit OS=Homo sapiens OX=9606 GN=CAPN1 PE=1 SV=1
356	TRUE	Q15019|SEPT2_HUMAN	51.71	36.84	10	10	Oxidation (M)	1062.22	1151.29	972.47	1463.52	1442.34	1626.04	978.896	1146.94	11041.7	10819.1	3421.04	3492.89	7818.13	7234.13	8330.67	12128.1	0.23:0.25:0.21:0.32:0.31:0.35:0.21:0.25:2.38:2.34:0.74:0.75:1.69:1.56:1.80:2.62	1162.38	1298.55	7193.71	8877.76	0.25:0.28:1.55:1.92	41487	Septin-2 OS=Homo sapiens OX=9606 GN=SEPTIN2 PE=1 SV=1
752	TRUE	P15151|PVR_HUMAN	52.69	13.67	4	4	Oxidation (M)	3037.05	2860.41	5903.03	5555.7	3120.7	4794.5	1925.21	1152.68	53407.9	43833.3	23254.5	21401	25668.6	14691	27334	26246.3	0.18:0.17:0.36:0.34:0.19:0.29:0.12:0.07:3.23:2.65:1.41:1.30:1.55:0.89:1.66:1.59	4339.05	2748.28	35474.2	23485	0.26:0.17:2.15:1.42	45303	Poliovirus receptor OS=Homo sapiens OX=9606 GN=PVR PE=1 SV=2
964	TRUE	P43405|KSYK_HUMAN	95.39	5.51	3	3	Oxidation (M)	0	0	0	0	312.473	227.751	448.038	123.91	1233.12	931.471	2266.02	2077.54	1217.56	314.65	1344.08	1420.06	0.00:0.00:0.00:0.00:0.42:0.31:0.60:0.17:1.66:1.25:3.04:2.79:1.63:0.42:1.80:1.91	0	388.6	1789.5	1138.99	0.00:0.47:2.16:1.37	72066	Tyrosine-protein kinase SYK OS=Homo sapiens OX=9606 GN=SYK PE=1 SV=1
535	TRUE	Q13464|ROCK1_HUMAN	23.5	3.47	5	4	Acetylation (N-term); Oxidation (M)	261.752	380.712	259.014	50.0608	285.264	446.729	295.289	255.327	713.024	1112.09	641.336	578.562	1179.31	1287.03	562.258	700.635	0.46:0.68:0.46:0.09:0.51:0.79:0.52:0.45:1.27:1.98:1.14:1.03:2.09:2.29:1.00:1.24	294.251	361.282	789.149	932.307	0.50:0.61:1.33:1.57	158175	Rho-associated protein kinase 1 OS=Homo sapiens OX=9606 GN=ROCK1 PE=1 SV=1
58	TRUE	P11142|HSP7C_HUMAN	57.36	44.58	40	23	Carbamidomethylation; Oxidation (M)	6094.76	5565.56	9666.49	9922.67	10383.9	11954.6	23240.2	23919.9	224585	217613	60809.1	62671.5	173741	119135	125471	133517	0.08:0.07:0.13:0.13:0.14:0.16:0.31:0.31:2.95:2.86:0.80:0.82:2.28:1.56:1.65:1.75	7812.37	17374.7	141420	137966	0.10:0.23:1.86:1.81	70898	Heat shock cognate 71 kDa protein OS=Homo sapiens OX=9606 GN=HSPA8 PE=1 SV=1
702	TRUE	P15260|INGR1_HUMAN	51.41	18	6	6		231.818	299.281	152.465	487.54	383.489	537.47	240.662	298.256	5005.14	4921.16	1391.22	1029.56	4290.49	4046.17	4963.88	5809.56	0.11:0.14:0.07:0.23:0.18:0.25:0.11:0.14:2.35:2.31:0.65:0.48:2.01:1.90:2.33:2.73	387.395	392.926	3086.77	4777.53	0.18:0.18:1.43:2.21	54405	Interferon gamma receptor 1 OS=Homo sapiens OX=9606 GN=IFNGR1 PE=1 SV=1
248	TRUE	O94905|ERLN2_HUMAN	45.64	39.53	12	12	Oxidation (M)	2771.19	525.199	749.908	926.828	2803.63	871.91	888.801	1412.76	19460	19352.4	7097.23	8059.15	11668.9	7093.72	9961.8	9889.8	0.43:0.08:0.12:0.14:0.43:0.13:0.14:0.22:3.01:2.99:1.10:1.25:1.80:1.10:1.54:1.53	1288.11	1494.28	13492.2	9653.56	0.20:0.23:2.08:1.49	37840	Erlin-2 OS=Homo sapiens OX=9606 GN=ERLIN2 PE=1 SV=1
67	TRUE	Q13308|PTK7_HUMAN	85.92	40.19	36	36	Carbamidomethylation; Oxidation (M)	6632.02	6258.78	10157.7	10090	6514.28	8997.02	10070	11912.9	60081.9	57438.8	40347.3	40925.4	125963	85500.2	107931	118959	0.15:0.14:0.23:0.23:0.15:0.20:0.23:0.27:1.36:1.30:0.91:0.93:2.85:1.93:2.44:2.69	8284.62	9373.55	49698.3	109588	0.19:0.21:1.12:2.48	118392	Inactive tyrosine-protein kinase 7 OS=Homo sapiens OX=9606 GN=PTK7 PE=1 SV=2
101	TRUE	O00571|DDX3X_HUMAN	67.21	50.15	29	29	Acetylation (N-term); Carbamidomethylation; Oxidation (M)	1464.97	1090.36	585.525	1606.63	1924.9	1075.72	3002.46	3210.96	79081.7	79414.8	23110.9	21456	55485	40769.2	39244.8	41003.1	0.06:0.04:0.02:0.07:0.08:0.04:0.12:0.13:3.22:3.23:0.94:0.87:2.26:1.66:1.60:1.67	1186.87	2303.51	50765.8	44125.5	0.05:0.09:2.06:1.79	73243	ATP-dependent RNA helicase DDX3X OS=Homo sapiens OX=9606 GN=DDX3X PE=1 SV=3
594	TRUE	P18615|NELFE_HUMAN	103.45	17.37	5	5		0	0	0	0	0	0	0	0	764.724	798.979	209.248	156.843	764.278	419.17	462.997	508.136	0.00:0.00:0.00:0.00:0.00:0.00:0.00:0.00:3.00:3.13:0.82:0.61:2.99:1.64:1.81:1.99	0	0	704.102	562.592	0.00:0.00:2.22:1.78	43240	Negative elongation factor E OS=Homo sapiens OX=9606 GN=NELFE PE=1 SV=3
844	TRUE	Q86UK0|ABCAC_HUMAN	37.43	1.19	3	3	Oxidation (M)	0	0	0	56.3071	63.1274	0	251.036	52.4817	525.247	523.643	269.769	213.377	379.247	512.046	497.302	956.281	0.00:0.00:0.00:0.21:0.23:0.00:0.93:0.20:1.95:1.95:1.00:0.79:1.41:1.91:1.85:3.56	56.3071	244.842	383.009	728.711	0.16:0.69:1.08:2.06	293237	ATP-binding cassette sub-family A member 12 OS=Homo sapiens OX=9606 GN=ABCA12 PE=1 SV=3
6	TRUE	P58107|EPIPL_HUMAN	61.55	24.21	116	90	Carbamidomethylation; Oxidation (M)	571.967	611.705	841.563	837.247	986.072	723.6	3521.08	6425.33	81201.1	89666.2	20158.9	20302.8	86487.1	63112.9	96684.9	110943	0.02:0.02:0.02:0.02:0.03:0.02:0.10:0.18:2.23:2.46:0.55:0.56:2.37:1.73:2.65:3.04	766.482	2974.09	52832.2	89306.9	0.02:0.08:1.45:2.45	555658	Epiplakin OS=Homo sapiens OX=9606 GN=EPPK1 PE=1 SV=3
343	TRUE	Q05397|FAK1_HUMAN	49.79	13.31	11	11	Acetylation (N-term); Oxidation (M)	347.588	443.87	233.098	193.724	476.458	695.466	710.389	654.569	2260.44	3539.03	2773.74	3374.49	1727.36	1012.45	4847.37	3036.13	0.21:0.27:0.14:0.12:0.29:0.42:0.43:0.40:1.37:2.15:1.69:2.05:1.05:0.62:2.95:1.85	304.57	681.563	2986.93	2655.83	0.18:0.41:1.80:1.60	119233	Focal adhesion kinase 1 OS=Homo sapiens OX=9606 GN=PTK2 PE=1 SV=2
205	TRUE	Q9H2M9|RBGPR_HUMAN	50.93	14	15	15	Oxidation (M)	338.228	352.464	734.75	460.237	383.048	474.769	371.419	544.072	4267.68	4955.83	1276.45	1892.21	5313.77	2794.58	2662.87	4123.65	0.17:0.18:0.38:0.24:0.20:0.25:0.19:0.28:2.21:2.56:0.66:0.98:2.75:1.44:1.38:2.13	471.42	443.327	3098.04	3723.72	0.24:0.23:1.60:1.93	155985	Rab3 GTPase-activating protein non-catalytic subunit OS=Homo sapiens OX=9606 GN=RAB3GAP2 PE=1 SV=1
43	TRUE	O15031|PLXB2_HUMAN	51.94	32.15	48	47	Carbamidomethylation; Oxidation (M)	4325.7	4098.84	8322.95	7305.53	7091.97	8775.99	7760.13	9284.89	67467.6	62731.7	21542.1	19713.3	76952.5	39622.5	61435.7	71926.1	0.14:0.14:0.28:0.24:0.24:0.29:0.26:0.31:2.26:2.10:0.72:0.66:2.57:1.33:2.05:2.41	6013.25	8228.25	42863.7	62484.2	0.20:0.28:1.43:2.09	205127	Plexin-B2 OS=Homo sapiens OX=9606 GN=PLXNB2 PE=1 SV=3
463	TRUE	Q9H307|PININ_HUMAN	60.84	15.2	9	9	Oxidation (M)	238.863	163.977	478.569	369.397	178.293	219.153	308.325	336.52	5510.97	5291.86	1758.17	1736.11	3367.29	4223.04	7394.63	6277.68	0.10:0.07:0.20:0.16:0.08:0.09:0.13:0.14:2.33:2.24:0.74:0.73:1.42:1.79:3.13:2.65	398.324	298.51	3574.28	5315.66	0.17:0.12:1.49:2.22	81628	Pinin OS=Homo sapiens OX=9606 GN=PNN PE=1 SV=5
2	TRUE	Q09666|AHNK_HUMAN	87.25	42.31	199	199	Acetylation (N-term); Carbamidomethylation; Oxidation (M)	1854.39	1198.91	1614.2	1834.8	1805.33	2971.55	2027.42	2224.8	109511	123543	41993.5	40901.3	165755	68557	173112	143409	0.03:0.02:0.03:0.03:0.03:0.05:0.04:0.04:1.99:2.24:0.76:0.74:3.01:1.24:3.14:2.60	1625.58	2257.27	78987.3	137708	0.03:0.04:1.43:2.50	629101	Neuroblast differentiation-associated protein AHNAK OS=Homo sapiens OX=9606 GN=AHNAK PE=1 SV=2
93	TRUE	P10809|CH60_HUMAN	59.86	58.99	23	23	Carbamidomethylation; Oxidation (M)	451.115	353.015	2021.41	1588.84	337.829	630.338	1190.08	1403.69	69890.9	80883.2	16847.2	22206.9	63533.5	55345.3	31580.7	40774.1	0.02:0.02:0.08:0.07:0.02:0.03:0.05:0.06:2.87:3.33:0.69:0.91:2.61:2.28:1.30:1.68	1103.6	890.485	47457.1	47808.4	0.05:0.04:1.95:1.97	61055	60 kDa heat shock protein, mitochondrial OS=Homo sapiens OX=9606 GN=HSPD1 PE=1 SV=2
572	TRUE	P16422|EPCAM_HUMAN	42.41	25.8	6	6	Carbamidomethylation; Oxidation (M)	4182.93	5168.05	6601.53	6959.09	3813.1	5750.85	4248.57	3877.21	29195	27196.3	11141.4	11246.8	18607.6	13044.3	22031.3	28025.7	0.33:0.41:0.53:0.55:0.30:0.46:0.34:0.31:2.32:2.16:0.89:0.89:1.48:1.04:1.75:2.23	5752.84	4442.31	19694.9	20427.2	0.46:0.35:1.57:1.62	34932	Epithelial cell adhesion molecule OS=Homo sapiens OX=9606 GN=EPCAM PE=1 SV=2
826	TRUE	Q9H490|PIGU_HUMAN	51.5	14.02	5	5	Oxidation (M)	324.454	425.05	260.628	521.476	542.91	600.592	495.449	572.44	4487.03	4783.11	1231.17	1457.72	5387.77	2788.45	3757.58	4175.55	0.16:0.21:0.13:0.26:0.27:0.30:0.25:0.29:2.26:2.41:0.62:0.73:2.71:1.40:1.89:2.10	421.725	552.848	2989.76	4027.34	0.21:0.28:1.50:2.02	50052	Phosphatidylinositol glycan anchor biosynthesis class U protein OS=Homo sapiens OX=9606 GN=PIGU PE=1 SV=3
761	TRUE	Q12846|STX4_HUMAN	42.14	24.24	6	6		1076.7	1234.88	1826.16	1715.35	2142.87	2154.54	699.823	837.165	388.747	306.716	223.866	159.029	399.021	433.894	384.569	443.862	1.19:1.37:2.03:1.90:2.38:2.39:0.78:0.93:0.43:0.34:0.25:0.18:0.44:0.48:0.43:0.49	1463.27	1458.6	352.063	444.394	1.57:1.57:0.38:0.48	34180	Syntaxin-4 OS=Homo sapiens OX=9606 GN=STX4 PE=1 SV=2
926	TRUE	P21860|ERBB3_HUMAN	36.25	2.98	3	3		54.3077	0	0	54.6453	0	66.8117	60.5877	85.7931	811.151	870.103	204.856	189.873	795.886	579.243	994.114	993.257	0.15:0.00:0.00:0.15:0.00:0.19:0.17:0.24:2.25:2.42:0.57:0.53:2.21:1.61:2.76:2.76	54.4765	71.0642	670.931	840.625	0.13:0.17:1.64:2.05	148098	Receptor tyrosine-protein kinase erbB-3 OS=Homo sapiens OX=9606 GN=ERBB3 PE=1 SV=1
921	TRUE	P60510|PP4C_HUMAN	45.25	14.01	4	3	Oxidation (M)	463.889	430.657	430.842	229.034	227.689	282.057	476.177	544.586	992.136	1615.91	1167.88	607.902	2529.59	1800.72	1863.01	1748.79	0.48:0.45:0.45:0.24:0.24:0.29:0.49:0.57:1.03:1.68:1.21:0.63:2.63:1.87:1.93:1.82	388.605	399.439	1095.96	1985.53	0.40:0.41:1.13:2.05	35080	Serine/threonine-protein phosphatase 4 catalytic subunit OS=Homo sapiens OX=9606 GN=PPP4C PE=1 SV=1
676	TRUE	O95716|RAB3D_HUMAN	71.04	22.83	4	3	Oxidation (M)	938.793	888.023	523.314	743.342	1162.03	1256.99	1035.88	1044.41	4776.15	4150.08	2461.91	3394.11	6225.14	4751.26	7941.59	9003.36	0.30:0.28:0.17:0.24:0.37:0.40:0.33:0.33:1.52:1.32:0.78:1.08:1.98:1.51:2.53:2.86	773.368	1124.83	3786.37	7049.51	0.24:0.35:1.19:2.21	24267	Ras-related protein Rab-3D OS=Homo sapiens OX=9606 GN=RAB3D PE=1 SV=1
304	TRUE	Q8WTV0|SCRB1_HUMAN	34.08	13.22	8	8	Oxidation (M)	6905.56	6450.57	12332.4	13224.4	11967.7	11948.5	3462.81	4769.43	40032.6	39081.7	32141.7	32977.1	18427	12256.9	23818.5	21442.4	0.38:0.35:0.68:0.73:0.66:0.66:0.19:0.26:2.20:2.15:1.77:1.81:1.01:0.67:1.31:1.18	9728.22	8037.1	36058.3	18986.2	0.53:0.44:1.98:1.04	60878	Scavenger receptor class B member 1 OS=Homo sapiens OX=9606 GN=SCARB1 PE=1 SV=1
511	TRUE	O15111|IKKA_HUMAN	46.98	10.34	6	6	Oxidation (M)	263.9	112.378	241.601	453.609	71.4782	397.229	56.2417	171.388	2508.71	2424.63	767.861	996.16	3956.81	2706.55	3348.53	3996.49	0.19:0.08:0.17:0.32:0.05:0.28:0.04:0.12:1.79:1.73:0.55:0.71:2.82:1.93:2.38:2.85	380.019	265.639	1674.34	3502.09	0.26:0.18:1.15:2.41	84640	Inhibitor of nuclear factor kappa-B kinase subunit alpha OS=Homo sapiens OX=9606 GN=CHUK PE=1 SV=2
741	TRUE	Q14165|MLEC_HUMAN	55.76	16.44	4	4		155.044	71.0894	165.063	197.898	144.628	149.805	235.004	192.938	4093.38	3604.87	1138.77	745.072	2658.43	1801.77	3080.52	3651.9	0.11:0.05:0.12:0.14:0.10:0.11:0.17:0.14:2.97:2.61:0.82:0.54:1.93:1.31:2.23:2.65	147.274	180.593	2395.52	2798.16	0.11:0.13:1.74:2.03	32234	Malectin OS=Homo sapiens OX=9606 GN=MLEC PE=1 SV=1
820	TRUE	O14641|DVL2_HUMAN	43.98	5.43	4	3	Oxidation (M)	63.807	88.8579	170.178	160.376	103.882	140.81	288.377	135.915	527.506	1477.08	470.384	625.958	1171.11	939.119	868.113	545.479	0.13:0.18:0.35:0.33:0.21:0.29:0.59:0.28:1.09:3.04:0.97:1.29:2.41:1.93:1.79:1.12	120.805	275.192	991.097	880.955	0.21:0.49:1.75:1.55	78948	Segment polarity protein dishevelled homolog DVL-2 OS=Homo sapiens OX=9606 GN=DVL2 PE=1 SV=1
56	TRUE	Q86UP2|KTN1_HUMAN	70.46	43.04	47	47	Oxidation (M)	342.39	340.775	550.897	550.334	554.579	584.134	1361	1263.34	20035.9	16483.6	5685.58	5726.25	18795.3	15477.3	26276.2	29161	0.04:0.04:0.06:0.06:0.06:0.07:0.15:0.14:2.24:1.84:0.64:0.64:2.10:1.73:2.94:3.26	446.099	986.426	11982.8	22427.5	0.05:0.11:1.34:2.50	156275	Kinectin OS=Homo sapiens OX=9606 GN=KTN1 PE=1 SV=1
295	TRUE	P61106|RAB14_HUMAN	45.89	72.09	12	12	Carbamidomethylation; Oxidation (M)	4293.96	4068.39	5917.66	4741.65	2499.25	5550.05	2823.78	2769.95	18744.5	17357.7	7544.11	6505.38	22710.3	16462.9	22935	24406.5	0.41:0.38:0.56:0.45:0.24:0.52:0.27:0.26:1.77:1.64:0.71:0.61:2.15:1.56:2.17:2.31	4755.41	3410.76	12537.9	21628.7	0.45:0.32:1.18:2.04	23897	Ras-related protein Rab-14 OS=Homo sapiens OX=9606 GN=RAB14 PE=1 SV=4
810	TRUE	Q9Y639|NPTN_HUMAN	31.15	12.06	5	5	Oxidation (M)	1775.23	1743.52	616.129	3711.39	1658.7	3994.53	4418.49	4488.13	12114.6	9798.06	4210.88	4808.84	15939	11748.2	13236.5	9804.03	0.27:0.27:0.09:0.57:0.26:0.61:0.68:0.69:1.86:1.51:0.65:0.74:2.45:1.81:2.04:1.51	1961.57	3661.43	7733.1	12681.9	0.30:0.56:1.19:1.95	44387	Neuroplastin OS=Homo sapiens OX=9606 GN=NPTN PE=1 SV=2
134	TRUE	P30519|HMOX2_HUMAN	59.97	64.56	20	19	Acetylation (N-term); Carbamidomethylation; Oxidation (M)	2981.76	3053.18	3391.96	3517.88	3260.35	4488.12	4356.77	4428.72	90950.9	91116	19683.5	19278.7	78878	45172.1	67727.6	69634.1	0.09:0.10:0.11:0.11:0.10:0.14:0.14:0.14:2.84:2.85:0.62:0.60:2.47:1.41:2.12:2.18	3236.19	4133.49	55412	65427.1	0.10:0.13:1.73:2.04	36033	Heme oxygenase 2 OS=Homo sapiens OX=9606 GN=HMOX2 PE=1 SV=2
973	TRUE	P24666|PPAC_HUMAN	53.91	25.95	3	3		568.461	563.266	445.291	325.79	400.195	568.324	628.428	874.814	11498.5	10044.5	2422.23	2283	9551.23	5781.35	8694.02	7569.71	0.15:0.14:0.11:0.08:0.10:0.15:0.16:0.22:2.96:2.58:0.62:0.59:2.46:1.49:2.24:1.95	475.702	617.941	6562.04	7899.08	0.12:0.16:1.69:2.03	18042	Low molecular weight phosphotyrosine protein phosphatase OS=Homo sapiens OX=9606 GN=ACP1 PE=1 SV=3
180	TRUE	P35052|GPC1_HUMAN	66.85	39.96	19	19	Carbamidomethylation; Oxidation (M)	1338.41	1285.62	1912.11	1654.71	1626.57	1979.32	2056.95	2093.55	22512.4	24142.4	7598.08	6648.68	31325.1	21253.7	29998.9	36519.1	0.11:0.11:0.16:0.14:0.13:0.16:0.17:0.17:1.86:1.99:0.63:0.55:2.58:1.75:2.47:3.01	1547.71	1939.1	15225.4	29774.2	0.13:0.16:1.26:2.46	61680	Glypican-1 OS=Homo sapiens OX=9606 GN=GPC1 PE=1 SV=2
746	TRUE	Q5VZ89|DEN4C_HUMAN	39.37	1.62	3	3		0	0	53.6714	0	0	0	54.4322	67.5162	1692.82	1395.96	458.972	457.846	965.832	509.986	800.639	864.389	0.00:0.00:0.12:0.00:0.00:0.00:0.12:0.15:3.70:3.05:1.00:1.00:2.11:1.11:1.75:1.89	53.6714	60.9742	1001.4	785.211	0.11:0.13:2.11:1.65	212711	DENN domain-containing protein 4C OS=Homo sapiens OX=9606 GN=DENND4C PE=1 SV=3
1079	TRUE	Q14728|MFS10_HUMAN	49.61	7.47	3	3		0	0	0	54.7386	50.7852	76.7952	76.2765	53.1018	2268.66	2529.22	435.772	483.339	1929.23	1303.58	1413.62	1786.29	0.00:0.00:0.00:0.07:0.07:0.10:0.10:0.07:2.91:3.25:0.56:0.62:2.48:1.67:1.82:2.29	54.7386	64.2397	1597.34	1608.18	0.07:0.08:1.92:1.93	48339	Major facilitator superfamily domain-containing protein 10 OS=Homo sapiens OX=9606 GN=MFSD10 PE=1 SV=1
83	TRUE	P29323|EPHB2_HUMAN	51.54	26.82	24	18	Carbamidomethylation; Oxidation (M)	2815.41	2243.35	2053.5	2675.41	760.74	1736.59	1294.34	5063.69	39376.1	45150.4	15400.2	15025.1	24133.7	17811.5	19274.4	18650.4	0.21:0.17:0.15:0.20:0.06:0.13:0.10:0.38:2.95:3.38:1.15:1.13:1.81:1.34:1.44:1.40	2446.92	2213.84	28737.9	19967.5	0.18:0.17:2.15:1.50	117493	Ephrin type-B receptor 2 OS=Homo sapiens OX=9606 GN=EPHB2 PE=1 SV=5
716	TRUE	Q9NZN8|CNOT2_HUMAN	46.4	8.15	3	3		432.42	387.44	344.024	454.476	529.377	479.319	351.327	384.186	2137.44	1377.4	831.192	1085.32	2139.94	976.286	2104.57	2435.07	0.42:0.38:0.33:0.44:0.51:0.47:0.34:0.37:2.08:1.34:0.81:1.06:2.08:0.95:2.05:2.37	435.618	436.052	1398.08	1913.97	0.42:0.42:1.34:1.83	59738	CCR4-NOT transcription complex subunit 2 OS=Homo sapiens OX=9606 GN=CNOT2 PE=1 SV=1
142	TRUE	P07237|PDIA1_HUMAN	53.47	43.7	21	21	Oxidation (M)	1470.08	1548.46	1706.03	2206.56	2266.34	1936.15	3693.58	5535.07	21751.4	23732.5	7094.39	7661.07	34410.1	18916.4	22186.4	29741	0.13:0.13:0.15:0.19:0.20:0.17:0.32:0.48:1.87:2.04:0.61:0.66:2.96:1.63:1.91:2.56	1732.78	3357.79	15279.1	26313.5	0.15:0.29:1.31:2.25	57116	Protein disulfide-isomerase OS=Homo sapiens OX=9606 GN=P4HB PE=1 SV=3
139	TRUE	P27816|MAP4_HUMAN	53.01	28.91	25	25	Oxidation (M)	2575.2	2179.79	922.653	816.951	878.732	920.529	1578.72	1283.15	26437.1	25703.4	8096.48	7407.39	18498.2	12060.5	12541	12818.6	0.31:0.26:0.11:0.10:0.10:0.11:0.19:0.15:3.14:3.05:0.96:0.88:2.20:1.43:1.49:1.52	1623.65	1165.28	16911.1	13979.6	0.19:0.14:2.01:1.66	121005	Microtubule-associated protein 4 OS=Homo sapiens OX=9606 GN=MAP4 PE=1 SV=3
718	TRUE	Q8IZP0|ABI1_HUMAN	63.24	16.34	6	6	Carbamidomethylation; Oxidation (M)	235.18	273.882	340.976	237.508	1173.7	1157.87	1689.73	1324.35	3318.32	3081.02	1871.83	894.328	3570.54	4567.82	4930.23	4705.98	0.11:0.13:0.16:0.11:0.56:0.56:0.81:0.63:1.59:1.48:0.90:0.43:1.71:2.19:2.36:2.26	292.879	1336.41	2291.37	4443.65	0.14:0.64:1.10:2.13	55081	Abl interactor 1 OS=Homo sapiens OX=9606 GN=ABI1 PE=1 SV=4
215	TRUE	P19784|CSK22_HUMAN	58.96	58.86	15	15	Carbamidomethylation; Oxidation (M)	1992.08	2201.12	2884.58	2779.01	2205.6	2911.92	1889.87	2005.63	29024.6	21387.3	7249.03	7993.87	34523.9	19901.9	34122.5	27888.1	0.16:0.18:0.23:0.22:0.18:0.23:0.15:0.16:2.31:1.70:0.58:0.64:2.75:1.58:2.72:2.22	2464.2	2301.14	16413.7	29109.1	0.20:0.18:1.31:2.32	41213	Casein kinase II subunit alpha' OS=Homo sapiens OX=9606 GN=CSNK2A2 PE=1 SV=1
638	TRUE	Q7L5Y9|MAEA_HUMAN	59.38	23.99	7	7	Oxidation (M)	270.926	250.384	141.836	149.737	217.946	168.776	263.765	259.99	2526.79	3651.46	1140.53	891.766	4362.45	1747.46	3417.01	3560.69	0.19:0.17:0.10:0.10:0.15:0.12:0.18:0.18:1.76:2.54:0.79:0.62:3.03:1.21:2.37:2.47	203.221	263.921	2159.3	3271.9	0.14:0.18:1.46:2.22	45287	E3 ubiquitin-protein transferase MAEA OS=Homo sapiens OX=9606 GN=MAEA PE=1 SV=1
703	TRUE	P05362|ICAM1_HUMAN	39.91	13.53	5	5		294.688	365.091	651.377	515.905	514.197	586.195	116.066	94.6166	5307.76	5175.91	1934.45	2079.88	2964.25	1507.97	2600.49	3148.38	0.17:0.21:0.37:0.30:0.30:0.34:0.07:0.05:3.05:2.97:1.11:1.19:1.70:0.87:1.49:1.81	456.765	523.858	4263.78	2555.27	0.23:0.27:2.19:1.31	57825	Intercellular adhesion molecule 1 OS=Homo sapiens OX=9606 GN=ICAM1 PE=1 SV=2
55	TRUE	Q8WXH0|SYNE2_HUMAN	57.05	7.6	42	42	Oxidation (M)	282.109	296.042	443.604	498.898	273.187	367.536	575.667	601.327	2307.57	2459	1088.51	1128.31	3588.25	2700.12	4492.29	2935.47	0.19:0.20:0.30:0.33:0.18:0.24:0.38:0.40:1.54:1.64:0.72:0.75:2.39:1.80:2.99:1.95	413.372	481.635	1745.85	3429.03	0.27:0.32:1.15:2.26	796442	Nesprin-2 OS=Homo sapiens OX=9606 GN=SYNE2 PE=1 SV=3
498	TRUE	P49585|PCY1A_HUMAN	62.39	27.52	7	7	Oxidation (M)	143.591	187.168	249.629	257.843	225.545	252.516	346.417	323.762	2142.11	2469.09	754.969	992.7	4047.77	3030.73	2081.35	2531.53	0.11:0.15:0.20:0.21:0.18:0.20:0.28:0.26:1.71:1.97:0.60:0.79:3.23:2.42:1.66:2.02	209.558	287.06	1729.16	2922.84	0.16:0.22:1.34:2.27	41731	Choline-phosphate cytidylyltransferase A OS=Homo sapiens OX=9606 GN=PCYT1A PE=1 SV=2
162	TRUE	Q14126|DSG2_HUMAN	47.55	30.41	23	23	Carbamidomethylation; Oxidation (M)	547.113	691.943	1435.3	984.583	872.962	824.197	808.307	675.576	12951.3	14673.6	2190.65	3565.18	12422.6	7904.47	10026.6	12581.3	0.11:0.13:0.28:0.19:0.17:0.16:0.16:0.13:2.49:2.82:0.42:0.69:2.39:1.52:1.93:2.42	914.735	795.26	8345.18	10733.8	0.18:0.15:1.61:2.07	122294	Desmoglein-2 OS=Homo sapiens OX=9606 GN=DSG2 PE=1 SV=2
531	TRUE	P55010|IF5_HUMAN	50.1	18.1	7	7	Oxidation (M)	597.821	617.39	677.755	1188.61	623.216	866.901	808.229	1373.11	6070.56	6333.51	2428.76	2291.2	4431.64	5683.3	6216.85	9901.65	0.19:0.20:0.22:0.38:0.20:0.28:0.26:0.44:1.94:2.02:0.78:0.73:1.41:1.81:1.99:3.16	770.394	917.863	4281.01	6558.36	0.25:0.29:1.37:2.09	49223	Eukaryotic translation initiation factor 5 OS=Homo sapiens OX=9606 GN=EIF5 PE=1 SV=2
309	TRUE	Q15223|NECT1_HUMAN	45.89	32.11	11	11	Carbamidomethylation; Oxidation (M)	3948.83	3120.76	2275.79	2437.27	6368.9	5226.13	3980.9	3784.12	51915.6	56873.8	12768.7	7754.98	53270.2	41662.9	41062.5	43528.7	0.19:0.15:0.11:0.11:0.30:0.25:0.19:0.18:2.44:2.68:0.60:0.36:2.51:1.96:1.93:2.05	2945.67	4840.01	32328.3	44881.1	0.14:0.23:1.52:2.11	57158	Nectin-1 OS=Homo sapiens OX=9606 GN=NECTIN1 PE=1 SV=3
368	TRUE	P35232|PHB_HUMAN	71.91	47.06	9	9		309.224	329.753	631.993	498.91	656.005	908.495	900.13	851.278	28154.1	29577.3	7836.71	8264.02	22345.4	9714.88	14212.7	16504.6	0.03:0.04:0.07:0.06:0.07:0.10:0.10:0.10:3.18:3.34:0.88:0.93:2.52:1.10:1.60:1.86	442.47	828.977	18458	15694.4	0.05:0.09:2.08:1.77	29804	Prohibitin OS=Homo sapiens OX=9606 GN=PHB PE=1 SV=1
59	TRUE	O60610|DIAP1_HUMAN	78.19	36.01	37	37	Carbamidomethylation; Oxidation (M)	353.955	392.621	485.672	552.293	414.005	404.403	456.026	244.116	9275.97	5426.32	5244.47	4827.9	9130.98	4627.97	14149.5	15425.2	0.08:0.09:0.11:0.12:0.09:0.09:0.10:0.05:2.08:1.22:1.18:1.08:2.05:1.04:3.17:3.46	446.135	417.756	6193.66	10833.4	0.10:0.09:1.38:2.42	141347	Protein diaphanous homolog 1 OS=Homo sapiens OX=9606 GN=DIAPH1 PE=1 SV=2
626	TRUE	P29350|PTN6_HUMAN	64.83	11.93	5	5		100.33	84.7047	115.227	90.9974	81.7618	86.0499	132.483	97.1866	556.646	576.729	352.375	223.386	825.077	607.558	719.311	1130.01	0.28:0.23:0.32:0.25:0.23:0.24:0.37:0.27:1.54:1.60:0.98:0.62:2.28:1.68:1.99:3.13	97.8146	99.3703	473.121	820.49	0.26:0.27:1.27:2.20	67561	Tyrosine-protein phosphatase non-receptor type 6 OS=Homo sapiens OX=9606 GN=PTPN6 PE=1 SV=1
33	TRUE	P46940|IQGA1_HUMAN	35.33	42.91	55	53	Acetylation (N-term); Carbamidomethylation; Oxidation (M)	3800.66	4066.11	7707.77	6369.39	4803.16	5078.37	5802.03	9620.73	36568.6	37698.7	11005.7	10272.4	33039.7	20283.7	29213.2	30806.6	0.24:0.25:0.48:0.40:0.30:0.32:0.36:0.60:2.28:2.35:0.69:0.64:2.06:1.27:1.82:1.92	5485.98	6326.07	23886.4	28335.8	0.34:0.40:1.49:1.77	189252	Ras GTPase-activating-like protein IQGAP1 OS=Homo sapiens OX=9606 GN=IQGAP1 PE=1 SV=1
670	TRUE	Q9HBM0|VEZA_HUMAN	30.29	7.7	5	5	Oxidation (M)	0	0	75.7011	258.136	0	0	63.9602	69.7878	3069.67	3794.03	541.764	505.594	3332.34	2309.65	3346.35	3644.29	0.00:0.00:0.06:0.20:0.00:0.00:0.05:0.05:2.34:2.89:0.41:0.39:2.54:1.76:2.55:2.78	166.919	66.874	2258.72	3158.16	0.12:0.05:1.60:2.24	88665	Vezatin OS=Homo sapiens OX=9606 GN=VEZT PE=1 SV=3
783	TRUE	Q6Q0C0|TRAF7_HUMAN	54.98	7.01	4	4		96.9156	70.9977	110.153	101.053	107.583	91.44	87.0037	67.8882	1137.82	1319.87	401.824	318.552	700.04	559.694	732.379	708.593	0.23:0.17:0.27:0.24:0.26:0.22:0.21:0.16:2.75:3.19:0.97:0.77:1.69:1.35:1.77:1.71	94.7799	88.4788	794.514	675.177	0.23:0.21:1.92:1.63	74609	E3 ubiquitin-protein ligase TRAF7 OS=Homo sapiens OX=9606 GN=TRAF7 PE=1 SV=1
767	TRUE	O60941|DTNB_HUMAN	48.5	11.96	5	5	Oxidation (M)	152.944	141.743	155.041	180.19	237.425	219.826	250.167	199.057	2969.02	3296.5	3304.11	450.472	2153.41	1151.82	1911.18	1748.78	0.13:0.12:0.13:0.16:0.21:0.19:0.22:0.17:2.56:2.85:2.85:0.39:1.86:0.99:1.65:1.51	157.479	264.745	2505.02	1741.3	0.13:0.23:2.15:1.49	71356	Dystrobrevin beta OS=Homo sapiens OX=9606 GN=DTNB PE=1 SV=1
91	TRUE	Q13740|CD166_HUMAN	72.72	37.91	26	26	Carbamidomethylation; Oxidation (M)	7658.55	7061.3	12212	12285.3	6533.74	6997.66	2877.01	2993.52	220314	193003	96501.9	95388	68788	57754.9	100858	99092.2	0.12:0.11:0.20:0.20:0.11:0.11:0.05:0.05:3.56:3.12:1.56:1.54:1.11:0.93:1.63:1.60	9925.81	4944.18	151302	81623.2	0.16:0.08:2.44:1.32	65102	CD166 antigen OS=Homo sapiens OX=9606 GN=ALCAM PE=1 SV=2
193	TRUE	Q14571|ITPR2_HUMAN	65.01	3.78	13	8	Oxidation (M)	320.284	423.643	1043.93	646.959	334.16	280.942	215.029	236.358	12825.1	7852.83	3796.39	3278.63	6137.13	6602.09	4506.55	4558.97	0.10:0.13:0.31:0.20:0.10:0.08:0.06:0.07:3.87:2.37:1.14:0.99:1.85:1.99:1.36:1.37	696.238	298.847	7216.06	5451.19	0.20:0.09:2.11:1.60	308064	Inositol 1,4,5-trisphosphate receptor type 2 OS=Homo sapiens OX=9606 GN=ITPR2 PE=1 SV=2
44	TRUE	P12814|ACTN1_HUMAN	58.62	45.52	44	34	Carbamidomethylation; Oxidation (M)	1961.61	2245.88	5087.96	5364.8	10849.2	11719.4	16739	16871.3	87454.1	87239.1	34605.9	34726.1	42540.3	36913.6	37733.6	42455.3	0.07:0.08:0.17:0.18:0.37:0.40:0.56:0.57:2.95:2.94:1.17:1.17:1.43:1.24:1.27:1.43	3665.06	14044.7	61006.3	39910.7	0.12:0.47:2.06:1.35	103058	Alpha-actinin-1 OS=Homo sapiens OX=9606 GN=ACTN1 PE=1 SV=2
543	TRUE	P04049|RAF1_HUMAN	59.96	14.2	7	7	Oxidation (M)	91.2693	58.9913	0	0	133.992	134.52	72.3915	161.45	6785.89	6286.79	2040.79	1705.06	3941.64	2223.03	2717.85	3861.7	0.05:0.03:0.00:0.00:0.07:0.07:0.04:0.09:3.59:3.33:1.08:0.90:2.09:1.18:1.44:2.04	75.1303	154.451	4204.63	3186.05	0.04:0.08:2.21:1.67	73052	RAF proto-oncogene serine/threonine-protein kinase OS=Homo sapiens OX=9606 GN=RAF1 PE=1 SV=1
747	TRUE	P62070|RRAS2_HUMAN	29.97	18.63	4	3	Oxidation (M)	118.338	323.809	537.284	85.0774	574.8	844.303	0	0	5066.4	5170.44	2161.49	2203.09	3645.53	3819.75	685.819	2437.15	0.07:0.19:0.31:0.05:0.33:0.49:0.00:0.00:2.93:2.99:1.25:1.27:2.11:2.21:0.40:1.41	266.127	709.551	3650.35	3150.68	0.14:0.36:1.88:1.62	23400	Ras-related protein R-Ras2 OS=Homo sapiens OX=9606 GN=RRAS2 PE=1 SV=1
519	TRUE	P36507|MP2K2_HUMAN	54.77	23.75	8	7	Oxidation (M)	189.54	176.081	455.979	370.885	184.586	308.595	489.486	507.375	10555.9	10217.8	2375.21	2564	7469.3	3522.57	7161.04	9114.49	0.05:0.05:0.13:0.11:0.05:0.09:0.14:0.15:3.03:2.94:0.68:0.74:2.15:1.01:2.06:2.62	369.375	397.232	6428.24	6816.85	0.11:0.11:1.84:1.95	44424	Dual specificity mitogen-activated protein kinase kinase 2 OS=Homo sapiens OX=9606 GN=MAP2K2 PE=1 SV=1
866	TRUE	P55201|BRPF1_HUMAN	71.07	3.13	4	4		83.8256	57.8416	0	0	99.8592	74.5643	0	0	1301.73	1015.94	801.314	858.761	3404.98	2417.2	2210.94	2513.27	0.09:0.06:0.00:0.00:0.11:0.08:0.00:0.00:1.40:1.10:0.86:0.93:3.67:2.61:2.38:2.71	70.8336	87.2117	1268.06	2636.6	0.07:0.09:1.25:2.60	137499	Peregrin OS=Homo sapiens OX=9606 GN=BRPF1 PE=1 SV=2
254	TRUE	Q08174|PCDH1_HUMAN	46.09	21.51	16	16	Oxidation (M)	1472.56	482.493	855.301	832.579	1838.98	534.963	1367.17	879.05	3858.87	4671.37	3929.67	3881.77	10985	5530.24	5205.82	4651.96	0.46:0.15:0.27:0.26:0.58:0.17:0.43:0.28:1.21:1.47:1.23:1.22:3.45:1.74:1.63:1.46	910.734	1155.04	4085.42	6593.24	0.29:0.36:1.28:2.07	114743	Protocadherin-1 OS=Homo sapiens OX=9606 GN=PCDH1 PE=1 SV=2
580	TRUE	Q86YS7|C2CD5_HUMAN	32.26	4.5	4	4	Oxidation (M)	186.845	173.443	864.236	786.068	358.366	446.987	493.405	416.686	2766.25	2649.36	855.339	924.874	3132.81	1885.94	3378.86	3646.07	0.13:0.12:0.60:0.55:0.25:0.31:0.34:0.29:1.93:1.85:0.60:0.64:2.18:1.31:2.35:2.54	534.321	450.304	1798.96	3010.92	0.37:0.31:1.24:2.08	110447	C2 domain-containing protein 5 OS=Homo sapiens OX=9606 GN=C2CD5 PE=1 SV=1
232	TRUE	P01130|LDLR_HUMAN	68.65	16.51	12	12	Carbamidomethylation; Oxidation (M)	585.114	499.918	755.875	764.3	712.069	891.328	1068.5	803.687	45487.9	41067.3	8312.34	9728.32	34006.2	17835.4	41294.8	46708.8	0.04:0.03:0.05:0.05:0.05:0.06:0.07:0.05:2.91:2.62:0.53:0.62:2.17:1.14:2.64:2.98	689.756	914.225	26149	34961.3	0.04:0.06:1.67:2.23	95376	Low-density lipoprotein receptor OS=Homo sapiens OX=9606 GN=LDLR PE=1 SV=1
1113	TRUE	Q53TN4|CYBR1_HUMAN	48.13	9.79	2	2		141.26	125.291	397.628	423.878	490.672	505.885	281.147	288.354	723.257	1135.15	1252.96	1149.09	1771.22	2070.3	2885.06	2434.77	0.14:0.12:0.40:0.42:0.49:0.50:0.28:0.29:0.72:1.13:1.25:1.14:1.76:2.06:2.87:2.42	318.545	447.035	1160.46	2290.34	0.30:0.42:1.10:2.17	31641	Cytochrome b reductase 1 OS=Homo sapiens OX=9606 GN=CYBRD1 PE=1 SV=1
757	TRUE	P09758|TACD2_HUMAN	44.73	13.93	5	5		1335.51	2849.83	3954.17	3602.65	10545.9	10692.5	5578.62	4802.02	17759.2	17527.1	9554.5	9122.83	20186.8	19267.4	26426.8	32263.7	0.11:0.23:0.32:0.29:0.86:0.88:0.46:0.39:1.45:1.43:0.78:0.75:1.65:1.58:2.16:2.64	2935.54	7904.77	16377.6	24536.2	0.23:0.61:1.27:1.90	35709	Tumor-associated calcium signal transducer 2 OS=Homo sapiens OX=9606 GN=TACSTD2 PE=1 SV=3
166	TRUE	P54760|EPHB4_HUMAN	37.9	19.55	20	14	Carbamidomethylation; Oxidation (M)	484.57	900.725	714.459	2128.1	956.838	526.632	817.122	582.69	8831.2	7706.42	5866.38	2080.89	5082.41	2293.33	4088.55	5286.65	0.16:0.30:0.24:0.70:0.32:0.17:0.27:0.19:2.92:2.55:1.94:0.69:1.68:0.76:1.35:1.75	1056.96	720.821	6121.22	4187.73	0.35:0.24:2.03:1.39	108270	Ephrin type-B receptor 4 OS=Homo sapiens OX=9606 GN=EPHB4 PE=1 SV=2
181	TRUE	Q08345|DDR1_HUMAN	72.08	23.55	16	16	Carbamidomethylation; Oxidation (M)	2769.3	2661.07	3273.27	2535.43	3350.09	4016.36	2948.07	3104.52	10829.3	12700.4	9094.84	8958.73	26729.2	12491.2	14494.4	20924.6	0.31:0.30:0.37:0.29:0.38:0.46:0.33:0.35:1.23:1.44:1.03:1.02:3.04:1.42:1.65:2.38	2809.77	3354.76	10395.8	18659.9	0.32:0.38:1.18:2.12	101128	Epithelial discoidin domain-containing receptor 1 OS=Homo sapiens OX=9606 GN=DDR1 PE=1 SV=1
643	TRUE	Q13873|BMPR2_HUMAN	96.2	8.67	6	6	Oxidation (M)	0	0	0	0	0	0	0	0	670.762	823.449	157.396	128.868	624.46	409.287	518.793	319.934	0.00:0.00:0.00:0.00:0.00:0.00:0.00:0.00:2.94:3.61:0.69:0.56:2.74:1.79:2.27:1.40	0	0	890.238	569.47	0.00:0.00:2.44:1.56	115201	Bone morphogenetic protein receptor type-2 OS=Homo sapiens OX=9606 GN=BMPR2 PE=1 SV=2
174	TRUE	Q7L1W4|LRC8D_HUMAN	46.98	27.62	19	19	Carbamidomethylation; Oxidation (M)	746.338	752.964	1142.04	1178.57	992.128	1192.09	1292.81	1288.1	13787.6	13667.5	3221.99	2930.37	11808.9	6489.11	10065.2	11094.1	0.15:0.15:0.22:0.23:0.19:0.23:0.25:0.25:2.70:2.68:0.63:0.57:2.31:1.27:1.97:2.17	954.978	1191.28	8401.88	9864.35	0.19:0.23:1.65:1.93	98201	Volume-regulated anion channel subunit LRRC8D OS=Homo sapiens OX=9606 GN=LRRC8D PE=1 SV=1
191	TRUE	O00443|P3C2A_HUMAN	49.63	12.04	17	17		432.947	324.042	216.091	1061.38	178.361	127.031	168.844	177.733	3340.89	3992.91	1352.36	2274.78	1848.46	4317.58	1435.02	1440.48	0.31:0.23:0.15:0.75:0.13:0.09:0.12:0.13:2.36:2.82:0.95:1.60:1.30:3.04:1.01:1.02	562.248	162.992	3452.85	2260.38	0.35:0.10:2.15:1.40	190680	Phosphatidylinositol 4-phosphate 3-kinase C2 domain-containing subunit alpha OS=Homo sapiens OX=9606 GN=PIK3C2A PE=1 SV=2
61	TRUE	P0DMV8|HS71A_HUMAN	48.89	31.36	35	17	Acetylation (N-term); Carbamidomethylation; Oxidation (M)	921.522	871.797	1247.09	710.949	3341.71	3714.36	19009	17732	59963	61372.1	13077.5	13222.4	66155.3	43921	35640.4	43230.9	0.04:0.04:0.05:0.03:0.14:0.15:0.79:0.74:2.50:2.56:0.54:0.55:2.76:1.83:1.48:1.80	937.838	10949.3	36908.8	47236.9	0.04:0.46:1.54:1.97	70052	Heat shock 70 kDa protein 1A OS=Homo sapiens OX=9606 GN=HSPA1A PE=1 SV=1
61	TRUE	P0DMV9|HS71B_HUMAN	48.89	31.36	35	17	Acetylation (N-term); Carbamidomethylation; Oxidation (M)	921.522	871.797	1247.09	710.949	3341.71	3714.36	19009	17732	59963	61372.1	13077.5	13222.4	66155.3	43921	35640.4	43230.9	0.04:0.04:0.05:0.03:0.14:0.15:0.79:0.74:2.50:2.56:0.54:0.55:2.76:1.83:1.48:1.80	937.838	10949.3	36908.8	47236.9	0.04:0.46:1.54:1.97	70052	Heat shock 70 kDa protein 1B OS=Homo sapiens OX=9606 GN=HSPA1B PE=1 SV=1
505	TRUE	Q9NR80|ARHG4_HUMAN	36.88	14.49	8	8	Oxidation (M)	58.3765	53.6396	136.165	132.438	65.3025	63.3661	523.597	382.005	2280.56	2281.65	456.548	590.309	2870.31	1302.53	2337.13	2471.96	0.06:0.05:0.14:0.13:0.07:0.06:0.52:0.38:2.28:2.28:0.46:0.59:2.87:1.30:2.34:2.47	121.382	416.49	1402.27	2245.48	0.12:0.40:1.34:2.15	79067	Rho guanine nucleotide exchange factor 4 OS=Homo sapiens OX=9606 GN=ARHGEF4 PE=1 SV=3
147	TRUE	Q9Y446|PKP3_HUMAN	48.86	43.16	24	24	Carbamidomethylation; Oxidation (M)	925.171	804.925	1353.16	1210.32	1561.45	1455.61	2296.11	1784.53	14757.1	16074.9	3258.58	3363.04	19301	12380.6	14409.2	18169.4	0.13:0.11:0.19:0.17:0.22:0.21:0.32:0.25:2.09:2.27:0.46:0.48:2.73:1.75:2.04:2.57	1073.39	1774.42	9363.41	16065	0.15:0.25:1.32:2.27	87082	Plakophilin-3 OS=Homo sapiens OX=9606 GN=PKP3 PE=1 SV=1
293	TRUE	Q8NFD5|ARI1B_HUMAN	52.37	6.44	10	10		463.638	659.746	170.21	168.305	63.2317	90.3823	172.158	207.475	6183.48	5821.31	1016.54	4182.45	4366.39	10041.7	3453.5	4681.8	0.18:0.25:0.07:0.06:0.02:0.03:0.07:0.08:2.37:2.23:0.39:1.60:1.67:3.85:1.32:1.79	638.195	133.312	4639.7	5635.84	0.23:0.05:1.68:2.04	236123	AT-rich interactive domain-containing protein 1B OS=Homo sapiens OX=9606 GN=ARID1B PE=1 SV=2
717	TRUE	Q96S59|RANB9_HUMAN	113.57	9.47	5	5	Oxidation (M)	0	0	0	0	0	0	0	0	2218.56	1500.93	691.562	624.777	1574.11	2389.3	785.449	696.47	0.00:0.00:0.00:0.00:0.00:0.00:0.00:0.00:3.39:2.29:1.06:0.95:2.40:3.65:1.20:1.06	0	0	1258.96	1361.33	0.00:0.00:1.92:2.08	77847	Ran-binding protein 9 OS=Homo sapiens OX=9606 GN=RANBP9 PE=1 SV=1
155	TRUE	Q07065|CKAP4_HUMAN	45.6	41.36	20	20	Oxidation (M)	408.355	469.898	480.765	515.478	689.83	308.596	1462.84	1049.07	11131.9	11416.1	2424.69	2437.24	10943.7	4933.36	8342.14	10369.7	0.10:0.11:0.11:0.12:0.16:0.07:0.35:0.25:2.64:2.71:0.58:0.58:2.60:1.17:1.98:2.46	468.624	1097.09	6852.48	8647.23	0.11:0.26:1.61:2.03	66022	Cytoskeleton-associated protein 4 OS=Homo sapiens OX=9606 GN=CKAP4 PE=1 SV=2
563	TRUE	Q96NE9|FRMD6_HUMAN	44.41	14.47	7	7	Oxidation (M)	63.6113	64.2355	310.045	274.012	108.469	302.361	217.918	188.587	4590.24	3794.11	1148.35	991.944	2635.95	1490.33	2575.53	2674.57	0.05:0.05:0.23:0.20:0.08:0.23:0.16:0.14:3.43:2.83:0.86:0.74:1.97:1.11:1.92:2.00	276.268	302.463	2631.16	2344.1	0.20:0.22:1.89:1.69	72044	FERM domain-containing protein 6 OS=Homo sapiens OX=9606 GN=FRMD6 PE=1 SV=1
442	TRUE	O75330|HMMR_HUMAN	40.68	17.54	10	10		0	34.3453	61.8873	0	0	0	66.933	54.291	1087.32	1187.15	4037.32	4060.44	949.392	4689.88	3111.74	2908.63	0.00:0.02:0.04:0.00:0.00:0.00:0.05:0.04:0.78:0.85:2.90:2.92:0.68:3.37:2.24:2.09	48.1163	60.612	2593.06	2914.91	0.03:0.04:1.85:2.08	84100	Hyaluronan mediated motility receptor OS=Homo sapiens OX=9606 GN=HMMR PE=1 SV=2
447	TRUE	P40189|IL6RB_HUMAN	29.85	6.75	6	6		81.7207	63.9848	427.655	427.498	636.056	289.446	190.802	200.612	1674.16	1709.2	469.586	615.235	2744.01	1841.67	2125.8	1674.51	0.09:0.07:0.45:0.45:0.67:0.31:0.20:0.21:1.77:1.80:0.50:0.65:2.89:1.94:2.24:1.77	375.777	329.229	1172.19	2096.5	0.38:0.33:1.18:2.11	103537	Interleukin-6 receptor subunit beta OS=Homo sapiens OX=9606 GN=IL6ST PE=1 SV=2
233	TRUE	P68400|CSK21_HUMAN	53.73	46.04	15	14	Carbamidomethylation; Oxidation (M)	4019.28	4025.65	6978.92	6870.43	3765.47	4852.76	6758.09	6749.51	64562	65563.7	20040	19268.9	74640.5	37455.6	81946.7	95836.9	0.13:0.13:0.22:0.22:0.12:0.15:0.21:0.21:2.05:2.08:0.64:0.61:2.37:1.19:2.60:3.05	5522.55	5531.46	42358.7	72469.9	0.18:0.18:1.35:2.30	45144	Casein kinase II subunit alpha OS=Homo sapiens OX=9606 GN=CSNK2A1 PE=1 SV=1
438	TRUE	P49757|NUMB_HUMAN	35.72	17.82	9	9	Oxidation (M)	197.571	301.461	488.248	584.069	630.756	695.55	857.133	762.729	5786.74	5272.72	3279.99	796.801	4657.64	1738.36	3397.3	4114.03	0.09:0.14:0.23:0.28:0.30:0.33:0.41:0.36:2.76:2.51:1.56:0.38:2.22:0.83:1.62:1.96	461.246	736.542	4084.47	3476.83	0.21:0.34:1.87:1.59	70804	Protein numb homolog OS=Homo sapiens OX=9606 GN=NUMB PE=1 SV=2
69	TRUE	P26006|ITA3_HUMAN	29.38	30.45	31	31	Carbamidomethylation; Oxidation (M)	19169.3	20065.8	44417.7	44637.9	81582.6	90559.8	56033.9	47910.6	159874	164302	64630.6	66160.8	143696	97056.2	123393	133908	0.23:0.24:0.52:0.53:0.96:1.07:0.66:0.56:1.88:1.94:0.76:0.78:1.69:1.14:1.45:1.58	32072.7	69021.7	113742	124513	0.38:0.81:1.34:1.47	116612	Integrin alpha-3 OS=Homo sapiens OX=9606 GN=ITGA3 PE=1 SV=5
346	TRUE	Q03135|CAV1_HUMAN	33.93	47.75	11	11	Carbamidomethylation	7359.78	9288.94	32445.6	33220.9	12403	19524.2	7696.31	6675.86	169349	169856	39461.9	45339.4	129187	75583.1	100001	110645	0.12:0.15:0.54:0.55:0.21:0.32:0.13:0.11:2.80:2.81:0.65:0.75:2.14:1.25:1.65:1.83	20578.8	11574.8	106002	103854	0.34:0.19:1.75:1.72	20472	Caveolin-1 OS=Homo sapiens OX=9606 GN=CAV1 PE=1 SV=4
484	TRUE	O15530|PDPK1_HUMAN	62.63	18.88	8	8		294.867	320.118	234.704	294.102	362.266	269.298	339.606	316.38	1747.22	2409.84	1117.3	1182.31	2770.44	1286.57	3826.04	3550.8	0.23:0.25:0.18:0.23:0.29:0.21:0.27:0.25:1.38:1.90:0.88:0.93:2.18:1.01:3.01:2.80	285.948	321.887	1614.17	2858.46	0.23:0.25:1.27:2.25	63152	3-phosphoinositide-dependent protein kinase 1 OS=Homo sapiens OX=9606 GN=PDPK1 PE=1 SV=1
560	TRUE	Q92692|NECT2_HUMAN	47.29	18.03	6	6	Carbamidomethylation; Oxidation (M)	808.088	827.715	1294.96	1396.68	1448.3	1621.6	1265.74	1234.87	16699	14865	4775.65	4583.73	11314.5	4226.87	11740.4	11791.7	0.14:0.15:0.23:0.25:0.26:0.29:0.23:0.22:2.97:2.65:0.85:0.82:2.01:0.75:2.09:2.10	1081.86	1392.63	10230.8	9768.36	0.19:0.25:1.82:1.74	57742	Nectin-2 OS=Homo sapiens OX=9606 GN=NECTIN2 PE=1 SV=1
513	TRUE	P39656|OST48_HUMAN	40.86	20.61	7	7		393.648	325.28	487.355	411.93	366.273	480.409	801.037	970.02	3362.32	3198.89	1163.42	1130	2988.34	1677.69	3883.74	4330.68	0.24:0.20:0.30:0.25:0.23:0.30:0.49:0.60:2.07:1.97:0.72:0.70:1.84:1.03:2.39:2.67	404.553	733.075	2213.66	3220.11	0.25:0.45:1.35:1.96	50801	Dolichyl-diphosphooligosaccharide--protein glycosyltransferase 48 kDa subunit OS=Homo sapiens OX=9606 GN=DDOST PE=1 SV=4
277	TRUE	Q6NZI2|CAVN1_HUMAN	79.54	34.87	13	13	Oxidation (M)	505.412	516.354	1000.59	916.64	880.643	839.959	843.216	831.803	27951.1	26449.1	8237.83	8081.58	38756	28361.1	45922.3	51827.9	0.03:0.03:0.07:0.06:0.06:0.06:0.06:0.06:1.85:1.75:0.54:0.53:2.56:1.88:3.04:3.43	734.75	848.905	17679.9	41216.8	0.05:0.06:1.17:2.73	43476	Caveolae-associated protein 1 OS=Homo sapiens OX=9606 GN=CAVIN1 PE=1 SV=1
315	TRUE	Q02978|M2OM_HUMAN	63.76	45.54	10	10	Acetylation (N-term); Oxidation (M)	410.804	508.866	371.351	302.636	591.911	643.654	504.584	495.628	26705.3	27394.6	4036.66	5131.36	20817.5	11162.3	18297.7	19896.1	0.05:0.06:0.04:0.04:0.07:0.08:0.06:0.06:3.11:3.19:0.47:0.60:2.43:1.30:2.13:2.32	398.414	558.944	18148.2	17543.4	0.04:0.06:1.98:1.91	34062	Mitochondrial 2-oxoglutarate/malate carrier protein OS=Homo sapiens OX=9606 GN=SLC25A11 PE=1 SV=3
274	TRUE	O43815|STRN_HUMAN	41.53	27.44	13	13	Acetylation (N-term); Carbamidomethylation; Oxidation (M)	546.191	469.224	504.319	616.386	544.309	664.296	1056.03	1088.78	5613.76	6459.73	1613.11	1589.31	4811.02	2521.43	5405.69	4319.74	0.23:0.20:0.21:0.26:0.23:0.28:0.45:0.46:2.37:2.73:0.68:0.67:2.04:1.07:2.29:1.83	534.03	870.97	4146.19	4354.6	0.22:0.35:1.67:1.76	86132	Striatin OS=Homo sapiens OX=9606 GN=STRN PE=1 SV=4
627	TRUE	P27797|CALR_HUMAN	44.79	21.58	6	6		260.326	298.187	394.139	406.116	447.045	515.322	1254.48	1123.53	3047.42	3497.49	1885.33	1923.21	1992.98	1667.57	5322.84	4643.92	0.15:0.17:0.22:0.23:0.25:0.29:0.70:0.63:1.70:1.95:1.05:1.07:1.11:0.93:2.97:2.59	339.692	835.096	2588.36	3406.83	0.19:0.47:1.44:1.90	48142	Calreticulin OS=Homo sapiens OX=9606 GN=CALR PE=1 SV=1
384	TRUE	P11166|GTR1_HUMAN	19.03	12.8	9	9	Oxidation (M)	3625.44	3348.57	17521.7	15906.8	7456.1	8699.74	1725.81	1797.78	29815.7	28689	14284.8	14529.8	22517.6	15035.2	16145	18286	0.26:0.24:1.28:1.16:0.54:0.63:0.13:0.13:2.17:2.09:1.04:1.06:1.64:1.10:1.18:1.33	10100.6	4919.86	21829.8	17995.9	0.74:0.36:1.59:1.31	54084	Solute carrier family 2, facilitated glucose transporter member 1 OS=Homo sapiens OX=9606 GN=SLC2A1 PE=1 SV=2
426	TRUE	Q13641|TPBG_HUMAN	42.83	18.1	8	8	Oxidation (M)	3280.74	2345.58	7885.35	8761.27	6011.4	6779.54	1090.25	1878.63	93752.3	76583.9	32116.3	32257.3	46397.7	41059.6	28653.6	31150.4	0.12:0.09:0.30:0.33:0.23:0.26:0.04:0.07:3.57:2.92:1.22:1.23:1.77:1.56:1.09:1.19	5686.4	4022.86	58677.4	36815.3	0.22:0.15:2.23:1.40	46032	Trophoblast glycoprotein OS=Homo sapiens OX=9606 GN=TPBG PE=1 SV=1
444	TRUE	Q9UHN6|CEIP2_HUMAN	52.98	8.6	10	10	Oxidation (M)	1007	895.803	1021.75	1213.33	1350.06	1052.08	989.923	760.424	5875.76	4490.27	6701.66	9536.48	8238.63	3743.7	2852.03	2661.74	0.31:0.27:0.31:0.37:0.41:0.32:0.30:0.23:1.79:1.37:2.05:2.91:2.52:1.14:0.87:0.81	1034.47	1038.12	6651.04	4374.03	0.32:0.32:2.03:1.34	154374	Cell surface hyaluronidase OS=Homo sapiens OX=9606 GN=CEMIP2 PE=1 SV=1
768	TRUE	Q6P1N0|C2D1A_HUMAN	53.13	4.31	3	3		58.7177	55.4519	69.5798	97.5653	104.131	116.074	94.4284	102.761	1092.46	1323.24	379.786	318.995	977.401	466.876	556.439	782.119	0.14:0.13:0.17:0.24:0.25:0.28:0.23:0.25:2.65:3.21:0.92:0.77:2.37:1.13:1.35:1.90	70.3287	104.348	932.135	695.709	0.16:0.23:2.07:1.54	104062	Coiled-coil and C2 domain-containing protein 1A OS=Homo sapiens OX=9606 GN=CC2D1A PE=1 SV=1
774	TRUE	P26045|PTN3_HUMAN	34.25	7.12	5	5		0	0	72.0159	62.4715	0	0	57.5509	0	1024.64	929.876	196.994	235.166	997.008	284.121	886.859	753.08	0.00:0.00:0.21:0.18:0.00:0.00:0.17:0.00:2.98:2.71:0.57:0.68:2.90:0.83:2.58:2.19	67.2437	57.5509	975.134	730.267	0.15:0.13:2.13:1.60	103990	Tyrosine-protein phosphatase non-receptor type 3 OS=Homo sapiens OX=9606 GN=PTPN3 PE=1 SV=2
53	TRUE	Q9Y490|TLN1_HUMAN	62.31	23.06	42	39	Carbamidomethylation; Oxidation (M)	1153.06	834.631	1991.52	1181.85	902.517	1287.61	1033.47	1318.74	17009.9	17101.8	19706.9	20079.2	5677.3	20977	5515.09	4971.03	0.15:0.11:0.26:0.16:0.12:0.17:0.14:0.17:2.25:2.27:2.61:2.66:0.75:2.78:0.73:0.66	1290.27	1135.58	18474.4	9285.1	0.17:0.15:2.45:1.23	269767	Talin-1 OS=Homo sapiens OX=9606 GN=TLN1 PE=1 SV=3
230	TRUE	P30153|2AAA_HUMAN	50.35	33.96	15	15	Oxidation (M)	519.201	691.702	540.715	559.95	1014.24	1011.84	1463.58	1709.73	20003.4	19012.5	2439.16	6024.98	15159.2	7653.65	12875.9	11970.8	0.08:0.11:0.08:0.09:0.16:0.16:0.23:0.27:3.12:2.96:0.38:0.94:2.36:1.19:2.01:1.87	597.48	1406.74	11870	11914.9	0.09:0.22:1.84:1.85	65309	Serine/threonine-protein phosphatase 2A 65 kDa regulatory subunit A alpha isoform OS=Homo sapiens OX=9606 GN=PPP2R1A PE=1 SV=4
246	TRUE	Q6NSJ5|LRC8E_HUMAN	43.67	20.23	12	11	Oxidation (M)	311.225	318.626	553.201	777.793	764.215	918.309	659.966	579.407	7308.7	6860.44	1326.93	1671.21	7571.16	3977.24	6776.47	8345.54	0.10:0.10:0.18:0.26:0.25:0.30:0.22:0.19:2.40:2.25:0.44:0.55:2.49:1.31:2.23:2.74	540.679	766.109	4291.82	6667.6	0.18:0.25:1.40:2.17	90247	Volume-regulated anion channel subunit LRRC8E OS=Homo sapiens OX=9606 GN=LRRC8E PE=1 SV=2
965	TRUE	Q13572|ITPK1_HUMAN	87.48	8.21	2	2		0	0	0	0	0	0	0	0	384.352	458.793	116.276	112.982	409.748	90.2215	446.672	526.854	0.00:0.00:0.00:0.00:0.00:0.00:0.00:0.00:2.42:2.88:0.73:0.71:2.58:0.57:2.81:3.31	0	0	320.781	368.374	0.00:0.00:1.86:2.14	45621	Inositol-tetrakisphosphate 1-kinase OS=Homo sapiens OX=9606 GN=ITPK1 PE=1 SV=2
459	TRUE	Q13613|MTMR1_HUMAN	49.41	9.47	6	5	Oxidation (M)	198.56	233.533	269.545	251.186	352.384	235.392	271.407	314.903	3127.32	2734.62	783.994	940.098	1363.19	1184.34	2148.72	1858.94	0.20:0.23:0.27:0.25:0.35:0.23:0.27:0.31:3.08:2.69:0.77:0.92:1.34:1.16:2.11:1.83	269.262	361.038	1896.51	1638.8	0.26:0.35:1.82:1.57	74678	Myotubularin-related protein 1 OS=Homo sapiens OX=9606 GN=MTMR1 PE=1 SV=4
318	TRUE	Q01650|LAT1_HUMAN	46.64	21.5	8	8	Carbamidomethylation; Oxidation (M)	11881.4	11154.2	15539	16605.5	65638.3	55253.9	18063.8	19397.4	114059	111720	50216.1	52335.7	196270	117960	173842	204727	0.15:0.14:0.20:0.22:0.85:0.72:0.23:0.25:1.48:1.45:0.65:0.68:2.54:1.53:2.25:2.65	13795	39588.4	82082.7	173200	0.18:0.51:1.06:2.24	55010	Large neutral amino acids transporter small subunit 1 OS=Homo sapiens OX=9606 GN=SLC7A5 PE=1 SV=2
593	TRUE	Q5T2T1|MPP7_HUMAN	36.48	19.1	8	8	Oxidation (M)	524.886	280.508	587.383	512.911	1010.56	633.699	908.317	974.47	4468.46	4420.63	1060.29	1145.11	4111.92	2432.11	3322.91	3898.51	0.28:0.15:0.31:0.27:0.53:0.33:0.48:0.51:2.36:2.33:0.56:0.60:2.17:1.28:1.76:2.06	476.422	945.551	2773.62	3441.36	0.25:0.50:1.45:1.80	65524	MAGUK p55 subfamily member 7 OS=Homo sapiens OX=9606 GN=MPP7 PE=1 SV=1
582	TRUE	Q9ULV4|COR1C_HUMAN	38.09	19.2	7	7	Carbamidomethylation	363.337	1569.54	2290.68	799.037	899.125	887.166	1445.62	1538.52	18046.5	19722.5	3745.67	3947.44	14954.4	9359.42	10269.4	13041.8	0.06:0.24:0.36:0.12:0.14:0.14:0.22:0.24:2.81:3.07:0.58:0.61:2.33:1.46:1.60:2.03	1287.64	1192.61	11365.5	11906.2	0.20:0.19:1.77:1.85	53249	Coronin-1C OS=Homo sapiens OX=9606 GN=CORO1C PE=1 SV=1
1022	TRUE	Q8IVF7|FMNL3_HUMAN	32.17	3.5	3	3		192.902	191.982	351.627	385.191	181.631	141.885	50.7018	148.336	1008.39	752.95	328.648	187.603	881.845	1019.63	1023.28	1066.55	0.39:0.39:0.71:0.78:0.37:0.29:0.10:0.30:2.04:1.52:0.66:0.38:1.78:2.06:2.07:2.16	280.425	154.178	569.397	997.827	0.56:0.31:1.14:1.99	117213	Formin-like protein 3 OS=Homo sapiens OX=9606 GN=FMNL3 PE=1 SV=3
1107	TRUE	O95197|RTN3_HUMAN	56.56	2.23	2	2		244.915	263.532	146.744	169.986	457.986	162.87	591.548	175.047	18500.7	19490.9	2422.96	2657.91	14754.2	8853.77	13450.9	14686.1	0.04:0.04:0.02:0.03:0.08:0.03:0.10:0.03:3.05:3.21:0.40:0.44:2.43:1.46:2.22:2.42	206.294	346.863	10888.5	12936.2	0.03:0.06:1.79:2.12	112611	Reticulon-3 OS=Homo sapiens OX=9606 GN=RTN3 PE=1 SV=2
42	TRUE	O75051|PLXA2_HUMAN	30.89	26.08	48	38	Carbamidomethylation; Oxidation (M)	1901.17	3192.36	4793.78	5362.39	12886.5	15242.1	5404.1	4781.66	30906.1	34202.3	8518.18	8077.95	33151	23689	34636.3	35310.6	0.12:0.19:0.29:0.33:0.79:0.93:0.33:0.29:1.89:2.09:0.52:0.49:2.02:1.45:2.11:2.16	3812.43	9578.59	20426.1	31696.7	0.23:0.58:1.25:1.94	211104	Plexin-A2 OS=Homo sapiens OX=9606 GN=PLXNA2 PE=1 SV=4
731	TRUE	Q9UBT7|CTNL1_HUMAN	55.86	6.13	3	3	Acetylation (N-term)	120.48	101.759	144.423	368.086	1130.41	2486.1	322.592	194.054	38237	25151.7	10759.8	11228.4	31006.2	34919.5	14266	8045.64	0.02:0.02:0.02:0.03:0.10:0.22:0.03:0.02:3.43:2.25:0.96:1.01:2.78:3.13:1.28:0.72	183.687	1033.29	21515.7	22091.6	0.02:0.09:1.92:1.97	81896	Alpha-catulin OS=Homo sapiens OX=9606 GN=CTNNAL1 PE=1 SV=2
263	TRUE	Q9NV70|EXOC1_HUMAN	42.7	18.46	12	12	Oxidation (M)	52.4812	88.3147	166.564	218.911	173.985	251.157	619.836	678.173	4431.66	4274.51	739.319	767.007	5158.38	2510.3	4317.24	4245.1	0.03:0.05:0.09:0.12:0.10:0.14:0.35:0.38:2.47:2.38:0.41:0.43:2.88:1.40:2.41:2.37	175.644	430.788	2553.12	4057.75	0.10:0.24:1.42:2.25	101982	Exocyst complex component 1 OS=Homo sapiens OX=9606 GN=EXOC1 PE=1 SV=4
608	TRUE	P05026|AT1B1_HUMAN	22.17	37.95	8	8	Carbamidomethylation; Oxidation (M)	9530.6	7071.64	18619.1	15001	18805.6	20385.3	6900.07	3795.6	68848.3	65790	17846.9	24609.3	48388.8	28218.8	55196.2	61208	0.32:0.24:0.63:0.51:0.64:0.69:0.23:0.13:2.34:2.24:0.61:0.84:1.65:0.96:1.88:2.08	12555.6	12471.6	44273.6	48252.9	0.43:0.42:1.51:1.64	35061	Sodium/potassium-transporting ATPase subunit beta-1 OS=Homo sapiens OX=9606 GN=ATP1B1 PE=1 SV=1
400	TRUE	Q8N2K0|ABD12_HUMAN	33.94	34.67	10	10	Oxidation (M)	1018.15	968.331	1492.6	1487.19	1094.17	1472.49	1761.23	1581.56	7360.14	7406.08	3406.57	3525.22	9315.44	2010.04	6313.57	8265.04	0.28:0.26:0.41:0.41:0.30:0.40:0.48:0.43:2.01:2.03:0.93:0.96:2.55:0.55:1.73:2.26	1284.23	1477.36	5424.5	6476.02	0.35:0.40:1.48:1.77	45097	Lysophosphatidylserine lipase ABHD12 OS=Homo sapiens OX=9606 GN=ABHD12 PE=1 SV=2
247	TRUE	Q12907|LMAN2_HUMAN	39.6	43.26	11	11	Carbamidomethylation; Oxidation (M)	1861.78	1022.46	1291.21	1587.14	2879.68	2119.15	2869	2565.2	12932.8	11171.8	3490.04	3799.07	9805.39	5745.23	12705.2	12628.1	0.34:0.18:0.23:0.29:0.52:0.38:0.52:0.46:2.34:2.02:0.63:0.69:1.77:1.04:2.30:2.28	1440.65	2608.26	7848.42	10221	0.26:0.47:1.42:1.85	40229	Vesicular integral-membrane protein VIP36 OS=Homo sapiens OX=9606 GN=LMAN2 PE=1 SV=1
829	TRUE	P51636|CAV2_HUMAN	33.9	37.65	4	4	Oxidation (M)	4440.74	4625.41	2544.67	1939.72	2059.63	2242.46	1137.02	1126.13	12410	11500.2	2336.74	4547.9	14210.7	9750.56	13432.6	15373.2	0.69:0.71:0.39:0.30:0.32:0.35:0.18:0.17:1.92:1.77:0.36:0.70:2.19:1.50:2.07:2.37	3457.77	1690.24	7879.35	13191.8	0.53:0.26:1.20:2.01	18291	Caveolin-2 OS=Homo sapiens OX=9606 GN=CAV2 PE=1 SV=2
207	TRUE	Q6P4Q7|CNNM4_HUMAN	51.87	26.58	18	16	Oxidation (M)	1239.25	1051.89	1825.87	1430.7	2634.04	3446.32	1636.25	1601.8	19667.2	19111.8	5042.75	4876.79	27180.9	15005.5	27040.3	28043.8	0.12:0.10:0.18:0.14:0.26:0.34:0.16:0.16:1.96:1.90:0.50:0.49:2.70:1.49:2.69:2.79	1386.93	2329.6	12174.6	24317.6	0.14:0.23:1.21:2.42	86607	Metal transporter CNNM4 OS=Homo sapiens OX=9606 GN=CNNM4 PE=1 SV=3
25	TRUE	P08195|4F2_HUMAN	44.71	60.32	78	78	Carbamidomethylation; Oxidation (M)	66090.6	67023.4	126449	127238	305378	349742	157175	157794	519839	556180	277143	277442	676321	497595	900824	915015	0.18:0.18:0.34:0.34:0.82:0.94:0.42:0.42:1.39:1.49:0.74:0.74:1.81:1.33:2.41:2.45	96700.2	242522	407651	747439	0.26:0.65:1.09:2.00	67994	4F2 cell-surface antigen heavy chain OS=Homo sapiens OX=9606 GN=SLC3A2 PE=1 SV=3
848	TRUE	O75251|NDUS7_HUMAN	34.17	19.72	3	3	Oxidation (M)	671.532	559.943	469.395	552.041	230.789	307.16	700.552	692.568	4501.16	3552.88	984.183	1109.19	3533.4	2126.83	2466.38	2867.75	0.42:0.35:0.30:0.35:0.15:0.19:0.44:0.44:2.84:2.24:0.62:0.70:2.23:1.34:1.56:1.81	580.16	504.67	2536.85	2748.59	0.36:0.32:1.59:1.73	23564	NADH dehydrogenase [ubiquinone] iron-sulfur protein 7, mitochondrial OS=Homo sapiens OX=9606 GN=NDUFS7 PE=1 SV=3
654	TRUE	P20337|RAB3B_HUMAN	31.27	29.68	5	4	Oxidation (M)	438.669	122.933	187.145	81.7954	457.309	977.082	336.054	341.393	1667	1694.68	513.866	511.559	1964.04	1079.04	1706.92	2069.53	0.50:0.14:0.21:0.09:0.52:1.10:0.38:0.39:1.89:1.92:0.58:0.58:2.22:1.22:1.93:2.34	547.86	602.666	1149.21	1704.88	0.55:0.60:1.15:1.70	24758	Ras-related protein Rab-3B OS=Homo sapiens OX=9606 GN=RAB3B PE=1 SV=2
455	TRUE	Q14156|EFR3A_HUMAN	34.98	10.72	6	6	Oxidation (M)	265.075	377.97	333.183	414.012	732.484	756.221	394.392	382.94	2468	3050.36	815.974	820.417	2079.1	1277.14	1837.77	2358.64	0.23:0.33:0.29:0.36:0.64:0.66:0.34:0.33:2.15:2.66:0.71:0.71:1.81:1.11:1.60:2.06	380.073	566.509	1788.69	1888.16	0.33:0.49:1.55:1.63	92924	Protein EFR3 homolog A OS=Homo sapiens OX=9606 GN=EFR3A PE=1 SV=2
462	TRUE	Q8NBU5|ATAD1_HUMAN	60.23	32.41	8	8	Carbamidomethylation; Oxidation (M)	331.322	304.189	554.869	493.774	426.049	430.804	233.437	454.879	25871	25768.1	3640.7	3745.03	19351.1	11950.8	26486.3	25184.6	0.04:0.03:0.06:0.05:0.05:0.05:0.03:0.05:2.85:2.84:0.40:0.41:2.13:1.32:2.92:2.77	449.463	403.601	14756.2	20743.2	0.05:0.04:1.62:2.28	40744	ATPase family AAA domain-containing protein 1 OS=Homo sapiens OX=9606 GN=ATAD1 PE=1 SV=1
417	TRUE	Q9P258|RCC2_HUMAN	44.74	28.35	9	9	Carbamidomethylation; Oxidation (M)	658.021	765.177	950.342	1004.28	976.357	1043.07	1137.07	1181.37	11997.7	12434.8	2797.37	2530.63	10807.6	4749.98	9686.31	11170.1	0.14:0.17:0.21:0.22:0.21:0.23:0.25:0.26:2.60:2.69:0.61:0.55:2.34:1.03:2.10:2.42	844.456	1084.47	7868.26	9103.51	0.18:0.23:1.67:1.93	56085	Protein RCC2 OS=Homo sapiens OX=9606 GN=RCC2 PE=1 SV=2
150	TRUE	Q9UDY2|ZO2_HUMAN	40.43	23.45	22	22	Oxidation (M)	2818.71	3031.18	4586.06	4423.52	4517.88	6517.08	2708.82	1903.12	5941.04	104148	40791.4	42586.1	58258.3	41133.4	75158.9	68757.7	0.10:0.10:0.16:0.15:0.15:0.22:0.09:0.07:0.20:3.57:1.40:1.46:1.99:1.41:2.57:2.35	3714.87	3911.72	48366.7	60827.1	0.13:0.13:1.66:2.08	133958	Tight junction protein ZO-2 OS=Homo sapiens OX=9606 GN=TJP2 PE=1 SV=2
322	TRUE	P08648|ITA5_HUMAN	25.18	19.45	14	14	Oxidation (M)	4756.47	4817.88	6801.5	10028.2	16267.4	10448.8	3893.52	5593.51	33457.7	34224.7	12530.3	7602.27	43637.7	30154.9	29229.2	29006.3	0.27:0.27:0.39:0.57:0.92:0.59:0.22:0.32:1.90:1.94:0.71:0.43:2.47:1.71:1.66:1.64	6601.01	9050.79	21953.7	33007	0.37:0.51:1.24:1.87	114536	Integrin alpha-5 OS=Homo sapiens OX=9606 GN=ITGA5 PE=1 SV=2
47	TRUE	P68104|EF1A1_HUMAN	78.35	59.74	41	41	Acetylation (N-term); Carbamidomethylation; Oxidation (M)	4762.02	5120.73	6245.33	6847.32	6123.54	3779.08	12989.1	6943.74	668291	766257	178436	224895	454640	331642	233347	255647	0.02:0.03:0.03:0.03:0.03:0.02:0.07:0.04:3.38:3.87:0.90:1.14:2.30:1.68:1.18:1.29	5743.85	7458.86	459470	318819	0.03:0.04:2.32:1.61	50141	Elongation factor 1-alpha 1 OS=Homo sapiens OX=9606 GN=EEF1A1 PE=1 SV=1
413	TRUE	O75122|CLAP2_HUMAN	40.14	10.28	10	10	Oxidation (M)	245.866	252.354	332.399	344.344	207.004	320.18	294.602	272.938	1562.93	1988.42	580.462	596.433	1105.28	1153.54	991.091	862.211	0.35:0.36:0.48:0.50:0.30:0.46:0.42:0.39:2.25:2.86:0.84:0.86:1.59:1.66:1.43:1.24	338.214	303.128	1265.18	1028.03	0.46:0.41:1.72:1.40	141064	CLIP-associating protein 2 OS=Homo sapiens OX=9606 GN=CLASP2 PE=1 SV=3
660	TRUE	Q9UEW8|STK39_HUMAN	54.34	15.96	6	6	Oxidation (M)	90.478	143.632	356.071	337.506	366.402	380.135	588.319	413.747	11334.8	11429.5	1919.5	2089.1	8730.54	6751.07	9187.01	15313.7	0.02:0.03:0.08:0.08:0.08:0.09:0.14:0.10:2.61:2.63:0.44:0.48:2.01:1.56:2.12:3.53	279.159	437.151	6693.23	9995.57	0.06:0.10:1.54:2.30	59474	STE20/SPS1-related proline-alanine-rich protein kinase OS=Homo sapiens OX=9606 GN=STK39 PE=1 SV=3
656	TRUE	Q9Y6K5|OAS3_HUMAN	65.01	5.06	5	5	Oxidation (M)	84.6832	79.0848	57.9579	79.786	131.024	81.6205	109.125	92.8106	709.328	1987.4	342.076	627.195	1973.63	1125.03	2195.36	1806.18	0.12:0.11:0.08:0.11:0.18:0.11:0.15:0.13:0.99:2.77:0.48:0.87:2.75:1.57:3.06:2.52	75.378	103.645	916.5	1775.05	0.11:0.14:1.28:2.47	121170	2'-5'-oligoadenylate synthase 3 OS=Homo sapiens OX=9606 GN=OAS3 PE=1 SV=3
214	TRUE	P13797|PLST_HUMAN	64.09	32.38	16	16	Acetylation (N-term); Carbamidomethylation; Oxidation (M)	802.783	860.22	852.544	1298.22	1220.86	1530.03	2308.57	2023.09	6775.74	39717	13784.5	13464	39799.1	22545.6	16340.3	28545.6	0.07:0.07:0.07:0.11:0.10:0.13:0.19:0.17:0.57:3.31:1.15:1.12:3.32:1.88:1.36:2.38	1121.67	1816.76	23329.8	26807.6	0.08:0.14:1.76:2.02	70811	Plastin-3 OS=Homo sapiens OX=9606 GN=PLS3 PE=1 SV=4
192	TRUE	Q9Y2A7|NCKP1_HUMAN	26.82	17.46	16	16	Oxidation (M)	1615.59	3566.16	2341.2	2461.94	1865.92	2659.03	1256.01	1618.72	8093.4	10404.2	1631.18	5109.26	11371.3	5822.42	10129.1	10420.7	0.32:0.71:0.47:0.49:0.37:0.53:0.25:0.32:1.61:2.07:0.32:1.02:2.26:1.16:2.02:2.07	2496.22	1849.92	6309.52	9435.89	0.50:0.37:1.26:1.88	128790	Nck-associated protein 1 OS=Homo sapiens OX=9606 GN=NCKAP1 PE=1 SV=1
14	TRUE	P07814|SYEP_HUMAN	66.69	58.8	75	75	Acetylation (N-term); Carbamidomethylation; Oxidation (M)	1764.71	2079.79	2479.29	2367.79	1463.2	1656.08	2759.93	2678.18	126584	124847	20932.7	21609.1	141221	84841	153456	196990	0.03:0.04:0.04:0.04:0.03:0.03:0.05:0.05:2.28:2.25:0.38:0.39:2.55:1.53:2.77:3.55	2211.18	2167.01	75961	144127	0.04:0.04:1.35:2.57	170591	Bifunctional glutamate/proline--tRNA ligase OS=Homo sapiens OX=9606 GN=EPRS1 PE=1 SV=5
452	TRUE	P57729|RAB38_HUMAN	55.2	41.23	8	7	Oxidation (M)	419.353	473.296	523.506	544.525	746.813	832.994	672.725	653.076	6126.09	6520.47	2008.62	1997.43	8079.1	3267.73	9034	9594.66	0.13:0.15:0.16:0.17:0.23:0.26:0.21:0.20:1.90:2.03:0.62:0.62:2.51:1.02:2.81:2.98	490.17	726.402	4163.15	7493.87	0.15:0.23:1.29:2.33	23712	Ras-related protein Rab-38 OS=Homo sapiens OX=9606 GN=RAB38 PE=1 SV=1
94	TRUE	P06576|ATPB_HUMAN	54.31	66.92	23	23	Oxidation (M)	1365.4	1409.04	3730.85	5266.92	1246.09	1682.27	1999.8	2173.91	71006.5	75913.4	18497.7	17526.1	35283.6	23303.7	38844.3	43660.2	0.06:0.07:0.17:0.25:0.06:0.08:0.09:0.10:3.31:3.54:0.86:0.82:1.65:1.09:1.81:2.04	2969.26	1775.52	45735.9	35272.9	0.14:0.08:2.13:1.65	56560	ATP synthase subunit beta, mitochondrial OS=Homo sapiens OX=9606 GN=ATP5F1B PE=1 SV=3
719	TRUE	P06703|S10A6_HUMAN	58.13	28.89	2	2	Acetylation (N-term); Carbamidomethylation; Oxidation (M)	159.982	151.718	463.649	536.304	1158.81	440.392	1611.83	871.543	36428.7	35644.3	5489.57	5707.43	47857.1	20171.8	42719.9	45200.1	0.02:0.02:0.03:0.04:0.08:0.03:0.11:0.06:2.38:2.33:0.36:0.37:3.13:1.32:2.79:2.96	364.273	1020.64	20817.5	38987.2	0.02:0.07:1.36:2.55	10180	Protein S100-A6 OS=Homo sapiens OX=9606 GN=S100A6 PE=1 SV=1
332	TRUE	P56199|ITA1_HUMAN	61.87	13.49	10	10	Carbamidomethylation; Oxidation (M)	458.087	434.043	580.928	593.024	1946.19	1657.15	1120.21	1154.12	2208.12	2736.6	1730.47	1301.6	4562.93	2922.3	4267.07	4087.83	0.23:0.22:0.29:0.30:0.98:0.83:0.56:0.58:1.11:1.38:0.87:0.66:2.30:1.47:2.15:2.06	601.759	1469.42	2134.8	4068.72	0.29:0.71:1.03:1.97	130848	Integrin alpha-1 OS=Homo sapiens OX=9606 GN=ITGA1 PE=1 SV=2
171	TRUE	Q32MZ4|LRRF1_HUMAN	51.69	34.41	19	19	Carbamidomethylation; Oxidation (M)	403.286	1332.9	3005.81	3042.45	481.165	424.014	796.733	634.793	26962	27622.9	11009.1	10428.9	12535.4	7020.7	10480	11063.7	0.05:0.17:0.38:0.38:0.06:0.05:0.10:0.08:3.39:3.47:1.38:1.31:1.58:0.88:1.32:1.39	1946.11	678.354	19005.7	10275	0.24:0.09:2.38:1.29	89253	Leucine-rich repeat flightless-interacting protein 1 OS=Homo sapiens OX=9606 GN=LRRFIP1 PE=1 SV=2
646	TRUE	Q9H4A4|AMPB_HUMAN	44.79	11.85	5	5	Carbamidomethylation	281.233	342.33	365.224	343.099	892.137	958.309	892.485	771.064	1163.86	962.842	1934.29	1705.27	1577.57	2132.92	929.54	878.857	0.28:0.34:0.36:0.34:0.88:0.95:0.89:0.76:1.15:0.96:1.92:1.69:1.56:2.12:0.92:0.87	332.972	878.499	1441.56	1379.72	0.33:0.87:1.43:1.37	72596	Aminopeptidase B OS=Homo sapiens OX=9606 GN=RNPEP PE=1 SV=2
605	TRUE	Q9Y653|AGRG1_HUMAN	40.82	10.25	6	6		582.566	575.415	1514.48	827.173	1296.66	926.655	1109.96	732.76	4197.84	4316.07	1558.77	2506.1	4461.29	3083.02	6643.95	7520.2	0.22:0.22:0.58:0.32:0.50:0.35:0.42:0.28:1.60:1.65:0.60:0.96:1.71:1.18:2.54:2.87	1000.44	1386.09	3180.7	5453.1	0.36:0.50:1.15:1.98	77738	Adhesion G-protein coupled receptor G1 OS=Homo sapiens OX=9606 GN=ADGRG1 PE=1 SV=2
796	TRUE	P26012|ITB8_HUMAN	52.44	10.4	5	5	Oxidation (M)	514.991	656.699	455.015	499.374	521.975	638.348	1000.97	870.144	4455.03	5009.66	1899.13	1545.78	5632.53	3203.32	6257.35	8561.76	0.20:0.25:0.17:0.19:0.20:0.24:0.38:0.33:1.71:1.92:0.73:0.59:2.16:1.23:2.40:3.28	638.435	757.859	3227.4	5913.74	0.24:0.29:1.23:2.24	85632	Integrin beta-8 OS=Homo sapiens OX=9606 GN=ITGB8 PE=1 SV=1
721	TRUE	Q70E73|RAPH1_HUMAN	33.78	2.48	3	3		57.1465	0	0	68.7952	71.9634	208.093	153.127	68.3028	1228.36	857.643	430.192	565.213	1656.98	284.966	888.439	671.824	0.13:0.00:0.00:0.15:0.16:0.46:0.34:0.15:2.73:1.90:0.95:1.25:3.68:0.63:1.97:1.49	62.9708	166.813	770.352	875.553	0.13:0.36:1.64:1.87	135256	Ras-associated and pleckstrin homology domains-containing protein 1 OS=Homo sapiens OX=9606 GN=RAPH1 PE=1 SV=3
376	TRUE	P10620|MGST1_HUMAN	53.15	42.58	4	4	Carbamidomethylation; Oxidation (M)	1934.92	1923.58	2617.25	2323.25	2451.92	877.904	1324.58	1233.22	46034.9	43344.2	8938.32	11656.6	37328.6	19862.3	28511	15156.4	0.14:0.14:0.19:0.16:0.17:0.06:0.09:0.09:3.27:3.08:0.63:0.83:2.65:1.41:2.02:1.08	2258.46	1517.98	27990.5	25214.6	0.16:0.11:1.96:1.77	17599	Microsomal glutathione S-transferase 1 OS=Homo sapiens OX=9606 GN=MGST1 PE=1 SV=1
157	TRUE	Q86W92|LIPB1_HUMAN	38.99	23.84	18	18	Oxidation (M)	588.241	683.325	1475.51	1432.6	752.434	860.145	628.935	891.985	3741.53	4497.67	1597.55	2020.32	5575.6	2499.11	5614.34	6747.06	0.24:0.28:0.60:0.58:0.30:0.35:0.25:0.36:1.51:1.82:0.65:0.82:2.25:1.01:2.27:2.73	1044.92	783.375	2964.27	5109.03	0.42:0.32:1.20:2.06	114024	Liprin-beta-1 OS=Homo sapiens OX=9606 GN=PPFIBP1 PE=1 SV=2
823	TRUE	Q9NRU3|CNNM1_HUMAN	53.88	2.21	5	2		0	0	0	0	0	62.1376	0	0	1210.84	1104.99	180.238	261.64	736.698	621.133	319.647	747.841	0.00:0.00:0.00:0.00:0.00:0.19:0.00:0.00:3.69:3.37:0.55:0.80:2.25:1.89:0.98:2.28	0	62.1376	778.946	606.33	0.00:0.17:2.15:1.68	104351	Metal transporter CNNM1 OS=Homo sapiens OX=9606 GN=CNNM1 PE=1 SV=3
571	TRUE	Q12774|ARHG5_HUMAN	38.76	4.82	5	5	Oxidation (M)	0	0	50.0997	0	65.0271	0	117.104	64.5299	1268.47	1132.81	239.447	150.231	999.236	538.142	647.399	718.779	0.00:0.00:0.13:0.00:0.17:0.00:0.31:0.17:3.39:3.03:0.64:0.40:2.67:1.44:1.73:1.92	50.0997	115.866	861.257	725.889	0.11:0.26:1.97:1.66	176799	Rho guanine nucleotide exchange factor 5 OS=Homo sapiens OX=9606 GN=ARHGEF5 PE=1 SV=3
787	TRUE	Q8IWB1|IPRI_HUMAN	20.58	6.22	3	3	Oxidation (M)	853.348	197.152	142.915	139.311	89.2701	769.304	137.368	110.919	1450.1	1283.98	508.734	529.372	971.579	773.827	1265.96	1839.76	1.23:0.29:0.21:0.20:0.13:1.11:0.20:0.16:2.10:1.86:0.74:0.77:1.41:1.12:1.83:2.66	333.181	276.715	943.046	1212.78	0.48:0.40:1.36:1.75	62060	Inositol 1,4,5-trisphosphate receptor-interacting protein OS=Homo sapiens OX=9606 GN=ITPRIP PE=1 SV=1
811	TRUE	O14735|CDIPT_HUMAN	54.18	15.96	3	3	Oxidation (M)	222.186	326.533	285.607	279.876	274.877	252.531	157.358	157.524	908.508	951.924	1430.62	843.699	1666.41	2496.37	2502.53	764.266	0.26:0.39:0.34:0.33:0.33:0.30:0.19:0.19:1.08:1.13:1.69:1.00:1.97:2.95:2.96:0.90	278.551	210.572	1033.69	1857.39	0.33:0.25:1.22:2.20	23539	CDP-diacylglycerol--inositol 3-phosphatidyltransferase OS=Homo sapiens OX=9606 GN=CDIPT PE=1 SV=1
548	TRUE	Q96JB2|COG3_HUMAN	50.84	9.42	6	6	Acetylation (N-term); Oxidation (M)	56.0899	59.6062	61.7836	63.5763	0	0	0	58.3295	2731.74	2563.06	701.119	1032.69	1103.78	755.995	1187.01	946.664	0.08:0.08:0.09:0.09:0.00:0.00:0.00:0.08:3.86:3.62:0.99:1.46:1.56:1.07:1.68:1.34	121.541	58.3295	1757.15	998.362	0.17:0.08:2.39:1.36	94096	Conserved oligomeric Golgi complex subunit 3 OS=Homo sapiens OX=9606 GN=COG3 PE=1 SV=3
38	TRUE	P14923|PLAK_HUMAN	58.72	55.17	46	38	Acetylation (N-term); Carbamidomethylation; Oxidation (M)	3556.26	5105.1	7416.39	7190.22	21526.6	24740.4	102442	93551.5	184784	144570	68255.2	69127.6	340516	240275	298580	319380	0.03:0.04:0.06:0.06:0.18:0.20:0.85:0.78:1.53:1.20:0.57:0.57:2.82:1.99:2.47:2.65	5816.99	60565.2	116684	299688	0.05:0.50:0.97:2.48	81745	Junction plakoglobin OS=Homo sapiens OX=9606 GN=JUP PE=1 SV=3
569	TRUE	P57735|RAB25_HUMAN	46.8	45.54	8	8	Oxidation (M)	612.036	590.604	714.785	561.821	880.393	991.899	1402.79	1418.12	17017.7	13252.8	2572.57	3097.83	11682	5558.45	11549.3	12409.2	0.12:0.11:0.14:0.11:0.17:0.19:0.27:0.27:3.23:2.51:0.49:0.59:2.22:1.05:2.19:2.35	657.332	1173.3	8985.25	10299.7	0.12:0.22:1.70:1.95	23496	Ras-related protein Rab-25 OS=Homo sapiens OX=9606 GN=RAB25 PE=1 SV=2
253	TRUE	Q9UHR4|BI2L1_HUMAN	45.79	36.59	15	15	Oxidation (M)	1599.45	1363.52	1124.28	1131.51	1811.73	2211.09	1495.27	1506.45	28643.6	29558.2	5049.6	4668.98	24592.3	12080.1	23215.1	17849	0.16:0.14:0.11:0.11:0.18:0.22:0.15:0.15:2.90:3.00:0.51:0.47:2.49:1.22:2.35:1.81	1304.69	1756.13	16980.1	19434.1	0.13:0.18:1.72:1.97	56883	Brain-specific angiogenesis inhibitor 1-associated protein 2-like protein 1 OS=Homo sapiens OX=9606 GN=BAIAP2L1 PE=1 SV=2
604	TRUE	O00291|HIP1_HUMAN	68.94	5.69	5	4	Oxidation (M)	0	0	0	0	50.9426	0	0	59.0927	1430.54	1510.37	225.006	213.557	1395.55	525.86	955.073	937.817	0.00:0.00:0.00:0.00:0.11:0.00:0.00:0.13:3.13:3.31:0.49:0.47:3.06:1.15:2.09:2.05	0	55.0176	1195.72	1075.14	0.00:0.09:2.06:1.85	116221	Huntingtin-interacting protein 1 OS=Homo sapiens OX=9606 GN=HIP1 PE=1 SV=5
496	TRUE	P11413|G6PD_HUMAN	28.27	22.14	9	9	Carbamidomethylation	865.108	518.53	781.983	1054.7	807.244	1266.94	1217.37	960.14	4302.34	4368.6	1191.95	1109.49	4247.74	3004.95	3237.11	3219.73	0.43:0.26:0.39:0.52:0.40:0.63:0.61:0.48:2.14:2.17:0.59:0.55:2.11:1.50:1.61:1.60	805.08	1062.92	2743.1	3427.38	0.40:0.53:1.36:1.71	59257	Glucose-6-phosphate 1-dehydrogenase OS=Homo sapiens OX=9606 GN=G6PD PE=1 SV=4
680	TRUE	P0CG48|UBC_HUMAN	37	5.84	4	4		29199.6	28703.2	25175.6	24545.6	50514.3	45416.9	28339.3	29542.2	236990	243501	52837.1	54818.2	294498	193417	161961	172385	0.28:0.27:0.24:0.23:0.48:0.43:0.27:0.28:2.27:2.33:0.51:0.52:2.82:1.85:1.55:1.65	26906	38453.2	147036	205565	0.26:0.37:1.41:1.97	77039	Polyubiquitin-C OS=Homo sapiens OX=9606 GN=UBC PE=1 SV=3
680	TRUE	P0CG47|UBB_HUMAN	37	17.47	4	4		29199.6	28703.2	25175.6	24545.6	50514.3	45416.9	28339.3	29542.2	236990	243501	52837.1	54818.2	294498	193417	161961	172385	0.28:0.27:0.24:0.23:0.48:0.43:0.27:0.28:2.27:2.33:0.51:0.52:2.82:1.85:1.55:1.65	26906	38453.2	147036	205565	0.26:0.37:1.41:1.97	25762	Polyubiquitin-B OS=Homo sapiens OX=9606 GN=UBB PE=1 SV=1
680	TRUE	P62979|RS27A_HUMAN	37	25.64	4	4		29199.6	28703.2	25175.6	24545.6	50514.3	45416.9	28339.3	29542.2	236990	243501	52837.1	54818.2	294498	193417	161961	172385	0.28:0.27:0.24:0.23:0.48:0.43:0.27:0.28:2.27:2.33:0.51:0.52:2.82:1.85:1.55:1.65	26906	38453.2	147036	205565	0.26:0.37:1.41:1.97	17965	Ubiquitin-40S ribosomal protein S27a OS=Homo sapiens OX=9606 GN=RPS27A PE=1 SV=2
680	TRUE	P62987|RL40_HUMAN	37	31.25	4	4		29199.6	28703.2	25175.6	24545.6	50514.3	45416.9	28339.3	29542.2	236990	243501	52837.1	54818.2	294498	193417	161961	172385	0.28:0.27:0.24:0.23:0.48:0.43:0.27:0.28:2.27:2.33:0.51:0.52:2.82:1.85:1.55:1.65	26906	38453.2	147036	205565	0.26:0.37:1.41:1.97	14728	Ubiquitin-60S ribosomal protein L40 OS=Homo sapiens OX=9606 GN=UBA52 PE=1 SV=2
328	TRUE	P17931|LEG3_HUMAN	36.66	32	11	10	Oxidation (M)	1684.32	934.33	1922.33	2140.49	1425.91	2839.05	22213	18914.5	83126.1	76739.8	18966.6	16062.3	68135.3	32685.5	90936.7	101385	0.05:0.03:0.06:0.06:0.04:0.08:0.66:0.56:2.46:2.27:0.56:0.48:2.02:0.97:2.69:3.00	1670.37	11348.1	48723.7	73285.6	0.05:0.34:1.44:2.17	26152	Galectin-3 OS=Homo sapiens OX=9606 GN=LGALS3 PE=1 SV=5
666	TRUE	Q9NPQ8|RIC8A_HUMAN	67.95	15.82	6	6	Oxidation (M)	146.401	115.905	77.3072	98.8436	156.82	55.839	104.259	119.11	3002.61	3076.32	1655.71	1736.02	1850.54	858.606	862.129	530.532	0.16:0.13:0.09:0.11:0.17:0.06:0.12:0.13:3.33:3.41:1.83:1.92:2.05:0.95:0.95:0.59	109.614	109.007	2367.66	1025.45	0.12:0.12:2.62:1.14	59710	Synembryn-A OS=Homo sapiens OX=9606 GN=RIC8A PE=1 SV=3
835	TRUE	Q14114|LRP8_HUMAN	36.41	4.05	3	3		135.736	199.398	193.666	211.792	166.884	175.059	158.57	246.635	2013.84	2565.8	313.477	354.334	1751.06	1402.16	1718.01	1856.21	0.16:0.24:0.23:0.25:0.20:0.21:0.19:0.29:2.39:3.05:0.37:0.42:2.08:1.67:2.04:2.21	202.977	228.022	1311.86	1681.86	0.24:0.27:1.53:1.96	105634	Low-density lipoprotein receptor-related protein 8 OS=Homo sapiens OX=9606 GN=LRP8 PE=1 SV=4
331	TRUE	P05067|A4_HUMAN	76.4	15.32	9	9	Oxidation (M)	734.912	648.863	1149.4	1097.21	1056.38	1306.05	824.099	1486.31	7619.31	8916.33	4147.97	3644.47	20075.9	13994.2	17496.6	17445.2	0.12:0.10:0.18:0.17:0.17:0.21:0.13:0.23:1.20:1.40:0.65:0.57:3.16:2.20:2.75:2.75	907.595	1168.21	6082.02	17253	0.14:0.18:0.96:2.72	86943	Amyloid-beta precursor protein OS=Homo sapiens OX=9606 GN=APP PE=1 SV=3
154	TRUE	O00159|MYO1C_HUMAN	29.72	23.61	20	19	Oxidation (M)	543.235	1070.47	2053.21	2251.1	4451.81	4800.91	2542.81	2033.32	11173.8	14162.6	3237	3069.79	14663.3	8047.48	12505.8	11605.4	0.09:0.17:0.33:0.37:0.73:0.78:0.41:0.33:1.82:2.31:0.53:0.50:2.39:1.31:2.04:1.89	1515	3457.21	7910.78	11705.5	0.25:0.56:1.29:1.90	121682	Unconventional myosin-Ic OS=Homo sapiens OX=9606 GN=MYO1C PE=1 SV=4
526	TRUE	Q96EY1|DNJA3_HUMAN	29.65	26.67	9	9	Oxidation (M)	1490.51	1316.33	1386.11	1306.39	1458.85	1229.13	1348.38	1194.38	3698.68	4691.87	1434.29	2024.86	4517.98	2639.9	3195.14	4020.81	0.65:0.57:0.60:0.57:0.63:0.53:0.58:0.52:1.60:2.03:0.62:0.88:1.96:1.14:1.38:1.74	1374.83	1307.68	2962.42	3593.46	0.60:0.57:1.28:1.56	52489	DnaJ homolog subfamily A member 3, mitochondrial OS=Homo sapiens OX=9606 GN=DNAJA3 PE=1 SV=2
532	TRUE	P54278|PMS2_HUMAN	40.7	11.48	6	6	Oxidation (M)	143.753	109.777	288.002	220.616	81.8697	174.043	206.737	228.616	2768.55	2399.09	547.247	757.57	1589.83	759.42	1486.17	1687.06	0.17:0.13:0.34:0.26:0.10:0.21:0.25:0.27:3.29:2.85:0.65:0.90:1.89:0.90:1.77:2.01	190.537	188.885	1637.58	1402.02	0.22:0.22:1.92:1.64	95797	Mismatch repair endonuclease PMS2 OS=Homo sapiens OX=9606 GN=PMS2 PE=1 SV=2
1057	TRUE	P46109|CRKL_HUMAN	35.08	10.56	2	2		117.963	143.098	190.934	220.983	221.431	336.906	412.634	488.609	1456.4	1921.13	920.533	406.974	533.11	1150.58	1238.45	1962.08	0.16:0.20:0.26:0.30:0.30:0.46:0.56:0.67:1.99:2.62:1.26:0.56:0.73:1.57:1.69:2.68	168.245	364.895	1221.17	1243.25	0.22:0.49:1.63:1.66	33777	Crk-like protein OS=Homo sapiens OX=9606 GN=CRKL PE=1 SV=1
487	TRUE	Q04721|NOTC2_HUMAN	31.3	3.32	8	6	Oxidation (M)	205.722	249.857	860.469	701.956	341.372	412.045	496.472	855.499	6042.61	5313.74	956.491	1085.03	5173.32	3151.1	3094.17	4587.08	0.10:0.12:0.41:0.33:0.16:0.20:0.24:0.41:2.88:2.54:0.46:0.52:2.47:1.50:1.48:2.19	504.501	617.491	3349.47	4001.42	0.24:0.29:1.58:1.89	265405	Neurogenic locus notch homolog protein 2 OS=Homo sapiens OX=9606 GN=NOTCH2 PE=1 SV=3
507	TRUE	O60645|EXOC3_HUMAN	49.64	15.44	8	8		67.6581	58.2164	83.5881	148.905	148.709	157.017	246.446	216.742	3528.24	3682.13	696.449	557.842	2773.2	1222.49	2042.07	2850.83	0.06:0.05:0.07:0.13:0.13:0.14:0.21:0.19:3.05:3.19:0.60:0.48:2.40:1.06:1.77:2.47	127.387	192.228	2116.16	2222.15	0.11:0.17:1.82:1.91	85567	Exocyst complex component 3 OS=Homo sapiens OX=9606 GN=EXOC3 PE=1 SV=3
661	TRUE	O95292|VAPB_HUMAN	42.67	30.04	7	6	Carbamidomethylation; Oxidation (M)	1328.34	1340.44	1265.7	1591.9	1358.5	1353.44	1616.69	1332.46	15824.8	16326.3	3288.8	3247.15	18848	9731.01	8493.28	15020.3	0.21:0.21:0.20:0.25:0.21:0.21:0.25:0.21:2.48:2.56:0.52:0.51:2.96:1.53:1.33:2.36	1442.68	1433.02	9671.75	13023.1	0.23:0.22:1.51:2.04	27228	Vesicle-associated membrane protein-associated protein B/C OS=Homo sapiens OX=9606 GN=VAPB PE=1 SV=3
475	TRUE	P51151|RAB9A_HUMAN	54.8	49.25	9	7	Oxidation (M)	135.041	211.237	306.375	289.99	664.058	777.377	735.697	775.478	6659.1	6028.53	1230.21	1434.86	7360.52	4630.79	9386.56	10101.2	0.04:0.07:0.10:0.09:0.21:0.25:0.23:0.24:2.10:1.90:0.39:0.45:2.32:1.46:2.96:3.19	258.568	760.374	3838.17	7869.76	0.08:0.24:1.21:2.47	22838	Ras-related protein Rab-9A OS=Homo sapiens OX=9606 GN=RAB9A PE=1 SV=1
184	TRUE	Q07954|LRP1_HUMAN	45.13	4.95	17	17	Oxidation (M)	97.7026	92.4165	361.516	360.043	241.676	309.473	243.841	234.426	4011.26	2846.99	990.363	865.648	2628.5	1896.44	4451.64	5291.52	0.06:0.06:0.23:0.23:0.16:0.20:0.16:0.15:2.58:1.83:0.64:0.56:1.69:1.22:2.86:3.40	299.851	298.983	2178.57	3567.03	0.19:0.19:1.37:2.25	504606	Prolow-density lipoprotein receptor-related protein 1 OS=Homo sapiens OX=9606 GN=LRP1 PE=1 SV=2
561	TRUE	P52799|EFNB2_HUMAN	42.33	13.81	4	3		389.184	319.154	362.921	377.531	479.377	547.973	430.214	453.51	7034.88	6690.17	977.169	1182.7	3622.26	3538.56	4512.86	5069.27	0.17:0.14:0.16:0.17:0.21:0.24:0.19:0.20:3.13:2.97:0.43:0.53:1.61:1.57:2.01:2.25	362.198	477.769	3971.23	4185.74	0.16:0.21:1.77:1.86	36923	Ephrin-B2 OS=Homo sapiens OX=9606 GN=EFNB2 PE=1 SV=1
335	TRUE	P21709|EPHA1_HUMAN	38.71	18.75	12	12	Oxidation (M)	908.666	603.436	848.72	833.915	524.234	582.771	1643.83	1264.67	8736.94	6750.44	2548.79	2442.12	3503.55	3799.42	3910.23	3681.44	0.34:0.23:0.32:0.31:0.20:0.22:0.62:0.48:3.28:2.54:0.96:0.92:1.32:1.43:1.47:1.38	832.177	1003.88	5119.57	3723.66	0.31:0.38:1.92:1.39	108127	Ephrin type-A receptor 1 OS=Homo sapiens OX=9606 GN=EPHA1 PE=1 SV=4
541	TRUE	O96019|ACL6A_HUMAN	37.47	28.9	8	8	Oxidation (M)	334.4	333.854	341.841	374.855	812.718	748.363	559.379	315.754	5163.05	6291.5	1160.55	624.241	5718.05	3395.05	5417.44	7112.18	0.14:0.14:0.14:0.15:0.34:0.31:0.23:0.13:2.13:2.60:0.48:0.26:2.36:1.40:2.24:2.94	403.101	609.053	3447.71	5410.68	0.16:0.25:1.40:2.19	47461	Actin-like protein 6A OS=Homo sapiens OX=9606 GN=ACTL6A PE=1 SV=1
77	TRUE	O43795|MYO1B_HUMAN	51.55	38.12	36	33	Carbamidomethylation; Oxidation (M)	1123.08	1504.46	2595.45	1839.45	7140.8	8597.97	4629.88	4316.62	95208.1	95797.2	15025.6	16308.9	59266.2	36576.5	53855.9	63388.6	0.04:0.05:0.09:0.06:0.24:0.29:0.16:0.15:3.26:3.28:0.51:0.56:2.03:1.25:1.84:2.17	1765.61	6171.32	58642.8	53271.8	0.06:0.21:1.96:1.78	131985	Unconventional myosin-Ib OS=Homo sapiens OX=9606 GN=MYO1B PE=1 SV=3
109	TRUE	Q8IWT6|LRC8A_HUMAN	65.81	42.35	28	27	Carbamidomethylation; Oxidation (M)	1411.86	1003.65	1869.81	1694.87	1269.03	692.432	1812.69	1156.33	72459.4	76127.1	16566.4	17270.2	32494.4	22890.1	35580.7	39490.6	0.07:0.05:0.09:0.08:0.06:0.03:0.09:0.06:3.58:3.76:0.82:0.85:1.61:1.13:1.76:1.95	1495.05	1232.62	45605.8	32613.9	0.07:0.06:2.25:1.61	94199	Volume-regulated anion channel subunit LRRC8A OS=Homo sapiens OX=9606 GN=LRRC8A PE=1 SV=1
632	TRUE	O15260|SURF4_HUMAN	27.54	19.7	4	4	Oxidation (M)	3233.99	601.096	620.508	640.492	2861.82	3755.91	957.061	910.647	14212.4	13843.2	4408.22	3648.77	6003.77	5436.36	7899.65	10705.6	0.65:0.12:0.12:0.13:0.57:0.75:0.19:0.18:2.85:2.78:0.88:0.73:1.20:1.09:1.59:2.15	1287.63	2121.36	9028.13	7511.35	0.26:0.43:1.81:1.51	30394	Surfeit locus protein 4 OS=Homo sapiens OX=9606 GN=SURF4 PE=1 SV=3
303	TRUE	O95817|BAG3_HUMAN	91.1	31.13	14	14	Oxidation (M)	606.378	560.581	643.91	682.58	1122.87	416.619	708.735	605.112	4464.6	5240.61	3473.66	3879.7	13312.8	10665.4	13739.7	15281.7	0.13:0.12:0.14:0.14:0.24:0.09:0.15:0.13:0.95:1.11:0.74:0.82:2.82:2.26:2.92:3.24	667.33	734.296	4264.64	13249.9	0.14:0.16:0.90:2.80	61595	BAG family molecular chaperone regulator 3 OS=Homo sapiens OX=9606 GN=BAG3 PE=1 SV=3
915	TRUE	O15258|RER1_HUMAN	32.04	24.49	4	4	Acetylation (N-term); Oxidation (M)	1214.86	1146.39	878.666	640.471	1064.39	1290.03	589.238	646.595	8649.78	8740.23	1421.19	1889.64	6546.48	4252.24	5671.28	5733.59	0.39:0.36:0.28:0.20:0.34:0.41:0.19:0.21:2.75:2.78:0.45:0.60:2.08:1.35:1.80:1.82	970.098	897.562	5175.21	5550.9	0.31:0.29:1.64:1.76	22958	Protein RER1 OS=Homo sapiens OX=9606 GN=RER1 PE=1 SV=1
99	TRUE	Q9UIQ6|LCAP_HUMAN	36.07	33.95	25	25	Carbamidomethylation; Oxidation (M)	2021.55	2355.97	1313.64	3289.35	4880.77	1232.05	802.751	2717.7	13343.3	11889.7	4126.89	4228.79	17032.8	13506	22388.3	22685.3	0.25:0.29:0.16:0.41:0.61:0.15:0.10:0.34:1.67:1.49:0.52:0.53:2.13:1.69:2.80:2.84	2245.13	2408.32	8397.16	18903.1	0.28:0.30:1.05:2.37	117349	Leucyl-cystinyl aminopeptidase OS=Homo sapiens OX=9606 GN=LNPEP PE=1 SV=3
283	TRUE	Q12955|ANK3_HUMAN	35.11	2.76	9	9		77.1889	0	182.177	173.014	126.679	131.136	238.579	253.679	1467.75	2809.11	360.18	509.24	1748.69	1041.01	1772.77	1535.08	0.10:0.00:0.23:0.22:0.16:0.17:0.31:0.33:1.89:3.62:0.46:0.66:2.25:1.34:2.28:1.98	175.647	187.518	1559.59	1524.39	0.20:0.22:1.81:1.77	480410	Ankyrin-3 OS=Homo sapiens OX=9606 GN=ANK3 PE=1 SV=3
506	TRUE	Q13131|AAPK1_HUMAN	41.86	15.92	8	8	Oxidation (M)	316.669	287.046	504.279	535.085	330.609	479.731	622.163	620.394	8832.39	9530.73	1675.81	1186.18	8590.83	3344.9	6727.61	6553.77	0.10:0.09:0.16:0.17:0.11:0.15:0.20:0.20:2.82:3.04:0.53:0.38:2.74:1.07:2.15:2.09	441.072	536.251	5306.28	6304.28	0.14:0.17:1.69:2.00	64009	5'-AMP-activated protein kinase catalytic subunit alpha-1 OS=Homo sapiens OX=9606 GN=PRKAA1 PE=1 SV=4
141	TRUE	P46939|UTRO_HUMAN	119.96	4.11	15	11	Oxidation (M)	0	0	0	0	0	0	0	0	4233.8	982.62	2593.56	2727.85	1276.08	547.514	1526.04	1514.81	0.00:0.00:0.00:0.00:0.00:0.00:0.00:0.00:4.40:1.02:2.69:2.83:1.33:0.57:1.59:1.57	0	0	2634.46	1216.11	0.00:0.00:2.74:1.26	394466	Utrophin OS=Homo sapiens OX=9606 GN=UTRN PE=1 SV=2
60	TRUE	P53618|COPB_HUMAN	25.16	47.32	37	37	Carbamidomethylation; Oxidation (M)	15635.2	3191.06	1689.43	2163.71	4241.81	11890.8	2131.36	7544.79	55821.1	55211.5	11655.1	16033.4	33281.6	23644	26000.3	32220.3	0.83:0.17:0.09:0.11:0.22:0.63:0.11:0.40:2.95:2.92:0.62:0.85:1.76:1.25:1.38:1.71	5669.85	6452.18	34680.3	28786.6	0.30:0.34:1.84:1.52	107142	Coatomer subunit beta OS=Homo sapiens OX=9606 GN=COPB1 PE=1 SV=3
908	TRUE	Q07021|C1QBP_HUMAN	49.53	20.92	4	4	Oxidation (M)	669.509	611.452	537.364	604.122	551.708	656.294	867.94	917.091	10208.8	10898.2	2773.25	2275.66	5658.32	5185.6	3740.38	5856.11	0.21:0.19:0.17:0.19:0.17:0.20:0.27:0.28:3.14:3.35:0.85:0.70:1.74:1.60:1.15:1.80	605.612	748.258	6538.98	5110.1	0.19:0.23:2.01:1.57	31362	Complement component 1 Q subcomponent-binding protein, mitochondrial OS=Homo sapiens OX=9606 GN=C1QBP PE=1 SV=1
896	TRUE	Q969G5|CAVN3_HUMAN	39.33	17.24	4	4	Oxidation (M)	85.8078	150.264	94.9517	156.473	151.22	163.167	170.192	138.084	1652.35	1488.7	367.542	295.277	1657.74	610.533	985.321	1268.48	0.15:0.25:0.16:0.27:0.26:0.28:0.29:0.23:2.80:2.52:0.62:0.50:2.81:1.04:1.67:2.15	121.874	155.666	950.967	1130.52	0.21:0.26:1.61:1.92	27701	Caveolae-associated protein 3 OS=Homo sapiens OX=9606 GN=CAVIN3 PE=1 SV=3
1	TRUE	Q15149|PLEC_HUMAN	75.07	51.07	259	232	Acetylation (N-term); Carbamidomethylation; Oxidation (M)	773.269	742.456	803.83	866.522	713.025	787.525	1501.72	1569.86	126963	135614	24711.2	24131.5	53028.2	60320	57937.1	63380	0.02:0.02:0.02:0.03:0.02:0.02:0.04:0.05:3.67:3.92:0.71:0.70:1.53:1.74:1.67:1.83	819.608	1162.33	77992.8	58744	0.02:0.03:2.25:1.69	531791	Plectin OS=Homo sapiens OX=9606 GN=PLEC PE=1 SV=3
360	TRUE	Q86X29|LSR_HUMAN	27.26	25.58	11	11	Oxidation (M)	1685.03	1688.48	2526.05	2717.64	5718.62	7479	3089.85	1792.08	15994.9	16709.8	3406.23	3914.33	19417.2	11416.4	15076.5	17359.7	0.21:0.21:0.31:0.33:0.70:0.92:0.38:0.22:1.97:2.06:0.42:0.48:2.39:1.41:1.86:2.14	2154.3	4519.89	10006.3	15817.5	0.27:0.56:1.23:1.95	71439	Lipolysis-stimulated lipoprotein receptor OS=Homo sapiens OX=9606 GN=LSR PE=1 SV=4
1002	TRUE	Q9BQE4|SELS_HUMAN	33.9	21.16	3	3	Oxidation (M)	78.5305	75.8169	96.3754	104.117	92.0695	159.996	309.933	128.306	1428.15	1508.21	198.231	272.203	1025.58	868.326	963.901	790.782	0.16:0.15:0.19:0.21:0.18:0.32:0.61:0.25:2.82:2.98:0.39:0.54:2.03:1.72:1.90:1.56	88.7099	297.023	962.267	953.518	0.15:0.52:1.67:1.66	21132	Selenoprotein S OS=Homo sapiens OX=9606 GN=SELENOS PE=1 SV=3
145	TRUE	Q9Y5S2|MRCKB_HUMAN	42.48	15.43	23	23	Oxidation (M)	381.536	479.486	751.618	800.221	825.287	888.904	1101.99	1175.66	5255.15	7049.58	1438.65	2330.98	6471.4	2996.92	8845.67	8726.53	0.12:0.15:0.24:0.26:0.27:0.29:0.36:0.38:1.70:2.28:0.46:0.75:2.09:0.97:2.86:2.82	603.215	997.96	4018.59	6760.13	0.19:0.32:1.30:2.18	194315	Serine/threonine-protein kinase MRCK beta OS=Homo sapiens OX=9606 GN=CDC42BPB PE=1 SV=2
1044	TRUE	Q15382|RHEB_HUMAN	88.38	20.11	3	3	Oxidation (M)	234.815	295.048	201.038	376.252	356.803	326.049	298.61	326.098	4675.6	4277.57	3120.8	3107.9	1401.32	1611.44	1424.9	946.152	0.16:0.21:0.14:0.26:0.25:0.23:0.21:0.23:3.26:2.98:2.17:2.16:0.98:1.12:0.99:0.66	306.041	354.799	3795.47	1345.96	0.21:0.24:2.62:0.93	20497	GTP-binding protein Rheb OS=Homo sapiens OX=9606 GN=RHEB PE=1 SV=1
88	TRUE	Q14160|SCRIB_HUMAN	23.17	29.45	31	31	Oxidation (M)	462.671	714.098	3627.71	3242.36	1068.53	1692.75	2263.51	1986.19	14822.4	16945.6	2652.38	3088.94	12395.2	7227.83	11905	13992.7	0.08:0.12:0.59:0.53:0.17:0.28:0.37:0.32:2.42:2.76:0.43:0.50:2.02:1.18:1.94:2.28	2061.63	1821.42	9377.34	11380.2	0.33:0.30:1.52:1.85	174885	Protein scribble homolog OS=Homo sapiens OX=9606 GN=SCRIB PE=1 SV=4
668	TRUE	Q8NHP6|MSPD2_HUMAN	33.76	11.78	5	5		431.705	435.326	483.709	573.677	676.178	398.995	429.403	464.589	3589.15	4014.5	811.936	820.045	3796.4	2475.68	2165.34	2191.06	0.29:0.29:0.33:0.39:0.46:0.27:0.29:0.31:2.42:2.70:0.55:0.55:2.56:1.67:1.46:1.48	481.104	492.291	2308.91	2657.12	0.32:0.33:1.55:1.79	59746	Motile sperm domain-containing protein 2 OS=Homo sapiens OX=9606 GN=MOSPD2 PE=1 SV=1
509	TRUE	Q7Z4S6|KI21A_HUMAN	61.16	4.6	6	6	Oxidation (M)	62.1493	0	94.4584	119.044	62.8099	74.7049	89.1197	141.806	1018.09	1014.09	443.978	495.163	1632.46	967.513	1986.44	2630.34	0.09:0.00:0.14:0.18:0.09:0.11:0.13:0.21:1.50:1.50:0.66:0.73:2.41:1.43:2.93:3.89	91.884	92.1102	831.87	1804.19	0.13:0.13:1.18:2.56	187179	Kinesin-like protein KIF21A OS=Homo sapiens OX=9606 GN=KIF21A PE=1 SV=2
966	TRUE	Q9BPZ7|SIN1_HUMAN	65.93	6.7	3	3	Acetylation (N-term)	0	0	0	0	0	56.3147	0	0	5772.97	5591.56	1019.45	1002.15	2807.39	1717.16	2362.34	3436.15	0.00:0.00:0.00:0.00:0.00:0.04:0.00:0.00:3.89:3.76:0.69:0.67:1.89:1.16:1.59:2.31	0	56.3147	4094.9	2781.06	0.00:0.03:2.36:1.60	59123	Target of rapamycin complex 2 subunit MAPKAP1 OS=Homo sapiens OX=9606 GN=MAPKAP1 PE=1 SV=2
706	TRUE	Q8TAG9|EXOC6_HUMAN	39.15	4.6	3	3	Acetylation (N-term)	66.344	95.9502	106.542	102.71	285.747	135.312	631.329	400.837	2405.83	1295.66	328.329	435.673	1001.92	1862.59	1942.51	1770.08	0.08:0.12:0.13:0.13:0.36:0.17:0.79:0.50:2.99:1.61:0.41:0.54:1.25:2.32:2.42:2.20	92.8865	690.978	1116.37	1644.28	0.10:0.78:1.26:1.86	93722	Exocyst complex component 6 OS=Homo sapiens OX=9606 GN=EXOC6 PE=1 SV=3
227	TRUE	P50281|MMP14_HUMAN	25.25	24.23	14	14	Carbamidomethylation; Oxidation (M)	1919.69	2890.35	5699.81	8189.94	3459.08	7705.09	4563.87	1347.76	34614.7	32881.7	9748.8	10259.6	23426.3	17477.1	14901.1	12889.8	0.16:0.24:0.48:0.68:0.29:0.64:0.38:0.11:2.88:2.74:0.81:0.86:1.95:1.46:1.24:1.07	4674.95	4268.95	21876.2	17173.6	0.39:0.36:1.82:1.43	65894	Matrix metalloproteinase-14 OS=Homo sapiens OX=9606 GN=MMP14 PE=1 SV=3
146	TRUE	Q96RT1|ERBIN_HUMAN	38.72	18.7	20	20	Oxidation (M)	668.212	711.876	649.755	739.341	1198.62	1295.93	1544.7	1429.03	6326.8	7531.79	1889.28	1870.41	7048.62	2662.06	6667.61	8900.71	0.21:0.22:0.20:0.23:0.38:0.41:0.48:0.45:1.98:2.36:0.59:0.59:2.21:0.83:2.09:2.79	692.296	1367.07	4404.57	6319.75	0.22:0.43:1.38:1.98	158298	Erbin OS=Homo sapiens OX=9606 GN=ERBIN PE=1 SV=2
673	TRUE	Q8WXX5|DNJC9_HUMAN	63.52	34.62	6	6	Oxidation (M)	94.6021	70.5468	63.142	72.3665	0	526.62	277.989	673.681	852.37	683.697	449.051	434.682	1864.44	1505.2	1092.57	980.468	0.16:0.12:0.10:0.12:0.00:0.87:0.46:1.12:1.41:1.13:0.75:0.72:3.09:2.50:1.81:1.63	75.1644	624.49	744.478	1437.72	0.10:0.87:1.03:2.00	29910	DnaJ homolog subfamily C member 9 OS=Homo sapiens OX=9606 GN=DNAJC9 PE=1 SV=1
520	TRUE	Q13586|STIM1_HUMAN	42.37	13.72	7	7		52.2378	63.1823	0	0	72.2018	62.5031	325.677	290.136	2124.82	1953.99	588.103	565.71	3193.23	2117.38	3793.84	4705.2	0.04:0.05:0.00:0.00:0.06:0.05:0.26:0.23:1.71:1.57:0.47:0.45:2.57:1.70:3.05:3.78	57.7101	276.939	1375.09	3452.41	0.04:0.21:1.07:2.68	77423	Stromal interaction molecule 1 OS=Homo sapiens OX=9606 GN=STIM1 PE=1 SV=3
653	TRUE	Q9H0B6|KLC2_HUMAN	34.69	6.75	3	3		87.3328	60.8026	131.138	100.792	244.876	87.9784	88.4119	70.7156	1001.74	975.064	265.986	282.491	457.817	489.472	364.624	594.026	0.26:0.18:0.40:0.30:0.74:0.27:0.27:0.21:3.02:2.94:0.80:0.85:1.38:1.48:1.10:1.79	95.0162	122.995	631.321	476.485	0.29:0.37:1.90:1.44	68935	Kinesin light chain 2 OS=Homo sapiens OX=9606 GN=KLC2 PE=1 SV=1
975	TRUE	Q8N4X5|AF1L2_HUMAN	85.86	5.62	3	3		0	0	0	0	0	0	0	0	1328.61	1846.03	168.122	211.685	1540.27	421.624	1174.17	1394.69	0.00:0.00:0.00:0.00:0.00:0.00:0.00:0.00:2.63:3.65:0.33:0.42:3.05:0.83:2.32:2.76	0	0	1296.42	1205.33	0.00:0.00:2.07:1.93	91300	Actin filament-associated protein 1-like 2 OS=Homo sapiens OX=9606 GN=AFAP1L2 PE=1 SV=1
578	TRUE	Q9Y666|S12A7_HUMAN	42.14	4.99	5	4	Oxidation (M)	106.637	98.9416	0	133.251	112.439	116.241	0	0	3547.06	3571.39	751.026	952.303	1364.73	1138.21	1693.2	1466.3	0.11:0.11:0.00:0.14:0.12:0.12:0.00:0.00:3.77:3.80:0.80:1.01:1.45:1.21:1.80:1.56	236.041	143.071	2205.45	1449.21	0.23:0.14:2.19:1.44	119106	Solute carrier family 12 member 7 OS=Homo sapiens OX=9606 GN=SLC12A7 PE=1 SV=3
126	TRUE	Q14C86|GAPD1_HUMAN	31.71	21.31	26	26	Oxidation (M)	2228.4	2246.3	2451.7	2306.41	3004.92	3636.06	2181.4	2485.69	17270.8	19101.9	4723.63	3566.44	14608.9	9635.11	9832.79	10601.1	0.32:0.33:0.36:0.34:0.44:0.53:0.32:0.36:2.51:2.78:0.69:0.52:2.13:1.40:1.43:1.54	2308.2	2827.02	11165.7	11169.5	0.34:0.41:1.63:1.63	164980	GTPase-activating protein and VPS9 domain-containing protein 1 OS=Homo sapiens OX=9606 GN=GAPVD1 PE=1 SV=2
1059	TRUE	Q8WUM9|S20A1_HUMAN	19.9	4.71	3	3		108.652	324.108	682.354	509.549	185.455	429.418	94.2973	107.311	1003.65	1588.62	607.03	480.61	440.859	849.064	988.743	1072.98	0.18:0.55:1.15:0.86:0.31:0.73:0.16:0.18:1.70:2.68:1.03:0.81:0.74:1.43:1.67:1.81	544.502	281.503	1379.48	1026.28	0.67:0.35:1.71:1.27	73700	Sodium-dependent phosphate transporter 1 OS=Homo sapiens OX=9606 GN=SLC20A1 PE=1 SV=1
688	TRUE	Q6EMK4|VASN_HUMAN	35.18	10.25	5	5		345.925	367.41	554.536	460.619	317.808	463.88	903.514	832.472	4576.05	3927.99	844.846	1042.3	5826.06	2139.37	4082.46	5421.27	0.17:0.18:0.28:0.23:0.16:0.23:0.45:0.41:2.28:1.96:0.42:0.52:2.90:1.07:2.03:2.70	469.295	629.419	2597.8	4367.29	0.23:0.31:1.29:2.17	71713	Vasorin OS=Homo sapiens OX=9606 GN=VASN PE=1 SV=1
726	TRUE	Q13433|S39A6_HUMAN	18.5	4.24	4	4		403.233	574.526	1709.69	1437.84	2177.85	2597.04	630.19	629.554	5182.25	6699.42	2177.25	1978.43	3536.12	2561.55	3245.03	5173.11	0.16:0.23:0.67:0.57:0.86:1.02:0.25:0.25:2.04:2.63:0.86:0.78:1.39:1.01:1.28:2.03	1059.46	1508.66	4212.61	3628.95	0.41:0.58:1.62:1.39	85047	Zinc transporter ZIP6 OS=Homo sapiens OX=9606 GN=SLC39A6 PE=1 SV=3
536	TRUE	Q9UN70|PCDGK_HUMAN	35	8.14	8	6		0	0	91.7402	67.3993	51.3151	66.4023	123.713	100.003	1822.72	2008.97	406.988	304.574	2375.16	581.985	1474.38	1175.1	0.00:0.00:0.14:0.10:0.08:0.10:0.19:0.15:2.74:3.02:0.61:0.46:3.57:0.87:2.21:1.77	79.5697	123.177	1305.86	1401.66	0.11:0.17:1.79:1.93	101077	Protocadherin gamma-C3 OS=Homo sapiens OX=9606 GN=PCDHGC3 PE=1 SV=1
800	TRUE	Q02750|MP2K1_HUMAN	29.51	12.47	5	4	Oxidation (M)	156.82	94.5315	259.02	198.639	208.143	247.211	253.166	230.552	1941.45	2594.11	361.254	220.371	2011.62	1348.38	1740.25	1460.99	0.19:0.11:0.31:0.24:0.25:0.30:0.30:0.28:2.33:3.11:0.43:0.26:2.42:1.62:2.09:1.75	209.956	278.357	1824.98	1696.37	0.21:0.28:1.82:1.69	43439	Dual specificity mitogen-activated protein kinase kinase 1 OS=Homo sapiens OX=9606 GN=MAP2K1 PE=1 SV=2
364	TRUE	Q9H7D0|DOCK5_HUMAN	38.8	5.29	8	8	Carbamidomethylation	300.234	297.171	447.624	538.799	563.847	350.478	195.019	564.421	2664.13	2338.46	4026.56	3798.06	2691.75	1267.45	1348.08	440.585	0.22:0.22:0.33:0.39:0.41:0.26:0.14:0.41:1.95:1.71:2.95:2.78:1.97:0.93:0.99:0.32	494.686	461.286	3206.8	1436.97	0.35:0.33:2.29:1.03	215309	Dedicator of cytokinesis protein 5 OS=Homo sapiens OX=9606 GN=DOCK5 PE=1 SV=3
812	TRUE	Q99829|CPNE1_HUMAN	30.72	11.73	5	5		525.049	542.28	507.077	636.559	893.742	709.028	873.912	532.431	3984.72	3738.1	1044.22	850.62	4255.79	2290.99	2238.48	2598.33	0.32:0.33:0.31:0.39:0.55:0.43:0.53:0.32:2.43:2.28:0.64:0.52:2.60:1.40:1.37:1.59	552.741	752.278	2607.05	2845.9	0.33:0.45:1.54:1.68	59059	Copine-1 OS=Homo sapiens OX=9606 GN=CPNE1 PE=1 SV=1
619	TRUE	Q5T5U3|RHG21_HUMAN	44.29	1.53	3	3		0	0	0	0	0	205.669	0	0	933.19	693.732	997.532	471.387	441.185	140.339	212.75	260.726	0.00:0.00:0.00:0.00:0.00:0.76:0.00:0.00:3.43:2.55:3.66:1.73:1.62:0.52:0.78:0.96	0	205.669	936.613	379.257	0.00:0.54:2.46:1.00	217462	Rho GTPase-activating protein 21 OS=Homo sapiens OX=9606 GN=ARHGAP21 PE=1 SV=2
313	TRUE	Q13492|PICAL_HUMAN	39.57	26.84	13	13	Oxidation (M)	434.428	501.067	796.708	999.004	931.847	620.254	1081.86	940.867	11638.5	13177.9	2060.66	2522.69	6171.17	4164.85	11981.9	10791.5	0.10:0.12:0.19:0.23:0.22:0.14:0.25:0.22:2.71:3.06:0.48:0.59:1.43:0.97:2.79:2.51	682.802	893.707	7349.92	8277.34	0.16:0.21:1.71:1.92	70755	Phosphatidylinositol-binding clathrin assembly protein OS=Homo sapiens OX=9606 GN=PICALM PE=1 SV=2
108	TRUE	P55196|AFAD_HUMAN	38.8	19.52	27	27	Oxidation (M)	563.547	523.34	690.226	672.035	1083	1180.54	1597.51	1281.63	5594.65	5234.9	1467.63	1458.49	5241.42	2727.22	6488.54	7701.42	0.21:0.19:0.25:0.25:0.40:0.43:0.59:0.47:2.06:1.93:0.54:0.54:1.93:1.00:2.39:2.83	639.052	1285.67	3438.92	5539.65	0.23:0.47:1.26:2.03	206804	Afadin OS=Homo sapiens OX=9606 GN=AFDN PE=1 SV=3
701	TRUE	Q9P289|STK26_HUMAN	33.73	18.27	6	6		531.328	628.799	893.738	805.26	1283.27	2415.41	754.992	1128.47	3329.13	4586.22	1004.15	2045.49	6865.71	4154.58	5589.59	3301.85	0.22:0.26:0.36:0.33:0.52:0.98:0.31:0.46:1.35:1.87:0.41:0.83:2.79:1.69:2.27:1.34	714.781	1395.54	3078.48	4977.93	0.28:0.55:1.21:1.96	46529	Serine/threonine-protein kinase 26 OS=Homo sapiens OX=9606 GN=STK26 PE=1 SV=2
395	TRUE	Q06481|APLP2_HUMAN	48.03	21.1	12	12	Oxidation (M)	376.597	359.986	541.238	504.686	640.299	688.625	722.221	612.488	3509.19	7279.06	1283.27	1487.53	6333.68	3153.87	6104.95	8546.65	0.14:0.14:0.21:0.19:0.24:0.26:0.27:0.23:1.33:2.76:0.49:0.56:2.40:1.20:2.32:3.24	479.143	713.394	3389.76	6034.79	0.18:0.27:1.28:2.27	86956	Amyloid-like protein 2 OS=Homo sapiens OX=9606 GN=APLP2 PE=1 SV=2
696	TRUE	O15379|HDAC3_HUMAN	36.68	14.95	4	4	Oxidation (M)	276.078	138.394	251.827	244.497	266.991	295.547	534.769	481.593	1748.72	3101.09	620.544	1766.88	744.602	3742.12	1582.38	2189.91	0.25:0.12:0.22:0.22:0.24:0.26:0.48:0.43:1.56:2.76:0.55:1.57:0.66:3.33:1.41:1.95	266.085	410.365	1904.42	2064.75	0.23:0.35:1.64:1.78	48848	Histone deacetylase 3 OS=Homo sapiens OX=9606 GN=HDAC3 PE=1 SV=2
152	TRUE	P43490|NAMPT_HUMAN	60.36	51.73	21	21	Carbamidomethylation; Oxidation (M)	1062.28	1119.41	2059.82	1429.09	1605.37	372.412	1373.18	2403.53	68952.6	65315.6	24959	23241.9	20489.7	13173.8	25493.4	27767.3	0.06:0.06:0.12:0.08:0.09:0.02:0.08:0.14:3.93:3.72:1.42:1.32:1.17:0.75:1.45:1.58	1417.65	1498.93	45617.3	21731	0.08:0.09:2.60:1.24	55521	Nicotinamide phosphoribosyltransferase OS=Homo sapiens OX=9606 GN=NAMPT PE=1 SV=1
197	TRUE	P46531|NOTC1_HUMAN	21.89	5.91	14	12	Oxidation (M)	544.519	747.532	3741.37	3510.37	1749	1970.28	1129.01	1117.33	13716.4	13335.8	3419.19	2955.84	8793.68	4781.58	7945.17	8805.01	0.11:0.15:0.76:0.72:0.36:0.40:0.23:0.23:2.80:2.73:0.70:0.60:1.80:0.98:1.62:1.80	2135.95	1530.84	8356.82	7581.36	0.44:0.31:1.71:1.55	272505	Neurogenic locus notch homolog protein 1 OS=Homo sapiens OX=9606 GN=NOTCH1 PE=1 SV=4
597	TRUE	Q96EP0|RNF31_HUMAN	50.01	8.49	7	7		73.9781	173.448	81.5737	77.4679	110.453	115.583	129.358	111.686	4108.58	4218.74	838.417	682.54	4288.43	835.681	3055.3	2341.76	0.06:0.13:0.06:0.06:0.08:0.09:0.10:0.08:3.09:3.18:0.63:0.51:3.23:0.63:2.30:1.76	101.617	116.77	2462.07	2630.29	0.08:0.09:1.85:1.98	119652	E3 ubiquitin-protein ligase RNF31 OS=Homo sapiens OX=9606 GN=RNF31 PE=1 SV=1
885	TRUE	Q9NXR1|NDE1_HUMAN	87.67	12.24	3	3		0	0	0	0	51.4235	64.9786	154.208	58.9328	401.169	442.59	213.341	101.476	893.733	376.098	357.713	806.039	0.00:0.00:0.00:0.00:0.21:0.27:0.63:0.24:1.64:1.81:0.87:0.41:3.65:1.53:1.46:3.29	0	145.983	480.77	645.163	0.00:0.46:1.51:2.03	37721	Nuclear distribution protein nudE homolog 1 OS=Homo sapiens OX=9606 GN=NDE1 PE=1 SV=3
340	TRUE	Q9P0L0|VAPA_HUMAN	33.74	27.71	7	6	Carbamidomethylation; Oxidation (M)	2573.41	2571.81	3553.2	3518.15	3881.07	4309.73	4618.34	6801.89	34358.8	33728.6	7276.64	7246.49	25564.3	11442.9	31112	38749.6	0.19:0.19:0.26:0.25:0.28:0.31:0.33:0.49:2.48:2.44:0.53:0.52:1.85:0.83:2.25:2.80	3095.99	4990.32	20652.6	26717.2	0.22:0.36:1.49:1.93	27893	Vesicle-associated membrane protein-associated protein A OS=Homo sapiens OX=9606 GN=VAPA PE=1 SV=3
689	TRUE	Q96BM9|ARL8A_HUMAN	39.33	38.71	6	6	Oxidation (M)	276.382	228.713	514.931	489.271	812.833	769.91	872.099	931.401	8368.23	9710.52	1396.92	1410.13	7679.88	3346.85	4903.04	6118.34	0.09:0.08:0.17:0.16:0.27:0.26:0.29:0.31:2.80:3.25:0.47:0.47:2.57:1.12:1.64:2.05	437.571	970.134	5221.45	5512.03	0.14:0.32:1.72:1.82	21416	ADP-ribosylation factor-like protein 8A OS=Homo sapiens OX=9606 GN=ARL8A PE=1 SV=1
127	TRUE	Q5T9A4|ATD3B_HUMAN	86.07	37.5	22	22	Carbamidomethylation; Oxidation (M)	284.274	309.048	370.881	344.485	427.433	567.837	512.638	491.705	59808.7	59113	14803.5	14812	26029.1	15098.6	20832.1	23668.7	0.02:0.02:0.02:0.02:0.03:0.04:0.03:0.03:4.03:3.98:1.00:1.00:1.75:1.02:1.40:1.59	327.172	499.903	37134.3	21407.1	0.02:0.03:2.50:1.44	72573	ATPase family AAA domain-containing protein 3B OS=Homo sapiens OX=9606 GN=ATAD3B PE=1 SV=1
859	TRUE	O95429|BAG4_HUMAN	61.35	12.04	4	4	Oxidation (M)	352.611	365.853	402.35	383.427	258.644	340.359	268.899	304.415	3308.39	3475.31	1644.63	1607.79	982.576	736.401	1445.05	1614.97	0.32:0.33:0.37:0.35:0.24:0.31:0.25:0.28:3.03:3.18:1.50:1.47:0.90:0.67:1.32:1.48	376.06	353.978	2723.24	1275.22	0.32:0.30:2.30:1.08	49594	BAG family molecular chaperone regulator 4 OS=Homo sapiens OX=9606 GN=BAG4 PE=1 SV=1
744	TRUE	Q6IQ49|SDE2_HUMAN	14.5	15.74	5	5	Oxidation (M)	0	0	70.8474	85.287	0	0	83.7411	139.957	1790.84	1568.49	143.117	61.1737	2110.59	911.364	1606.14	2107.59	0.00:0.00:0.11:0.13:0.00:0.00:0.13:0.21:2.68:2.35:0.21:0.09:3.16:1.37:2.41:3.16	78.0672	139.908	1177.78	1832.07	0.10:0.17:1.46:2.27	49742	Replication stress response regulator SDE2 OS=Homo sapiens OX=9606 GN=SDE2 PE=1 SV=1
179	TRUE	Q15046|SYK_HUMAN	32.2	39.87	21	21	Carbamidomethylation; Oxidation (M)	1358.94	1308.3	1499.63	2259.64	1791.69	1215.23	2217.73	2531.04	13067.8	14088.9	2114.83	2406.91	14142.3	8425.4	16896.6	18638.5	0.21:0.20:0.23:0.35:0.28:0.19:0.34:0.39:2.01:2.17:0.33:0.37:2.18:1.30:2.60:2.87	1626.49	1938.92	7919.63	14525.7	0.25:0.30:1.22:2.23	68048	Lysine--tRNA ligase OS=Homo sapiens OX=9606 GN=KARS1 PE=1 SV=3
132	TRUE	Q9H5V8|CDCP1_HUMAN	41.68	29.9	23	23	Carbamidomethylation; Oxidation (M)	1750.67	3727.52	4837.12	4621.13	7275.23	9695.94	10122.9	2622.79	71319.6	73029.8	21383.5	21699	29344.2	27175.6	26072.8	31866.5	0.08:0.17:0.22:0.21:0.34:0.45:0.47:0.12:3.29:3.37:0.99:1.00:1.35:1.25:1.20:1.47	3734.11	7429.23	46858	28614.8	0.17:0.34:2.16:1.32	92932	CUB domain-containing protein 1 OS=Homo sapiens OX=9606 GN=CDCP1 PE=1 SV=3
884	TRUE	P84095|RHOG_HUMAN	47.81	25.65	3	3	Carbamidomethylation	304.37	383.286	298.02	345.231	684.933	956.165	491.196	583.685	2602.91	2040.36	836.096	1350.01	4795.01	2123.9	1747.16	3358.51	0.21:0.27:0.21:0.24:0.48:0.67:0.34:0.41:1.82:1.43:0.58:0.94:3.35:1.48:1.22:2.35	401.641	698.801	1707.34	3006.15	0.28:0.48:1.17:2.07	21308	Rho-related GTP-binding protein RhoG OS=Homo sapiens OX=9606 GN=RHOG PE=1 SV=1
381	TRUE	Q9NTJ5|SAC1_HUMAN	33.05	21.29	11	11	Oxidation (M)	129.81	122.477	324.506	218.93	253.438	195.009	238.779	157.002	3801.68	3188.07	3148.5	324.692	815.147	3998.56	1653.23	1529.25	0.10:0.10:0.26:0.17:0.20:0.16:0.19:0.12:3.03:2.54:2.51:0.26:0.65:3.18:1.32:1.22	246.833	249.728	2870.26	1999.05	0.18:0.19:2.14:1.49	66967	Phosphatidylinositol-3-phosphatase SAC1 OS=Homo sapiens OX=9606 GN=SACM1L PE=1 SV=2
806	TRUE	Q9NVD7|PARVA_HUMAN	30.86	9.95	4	3		61.2353	0	140.37	114.505	105.579	118.185	181.342	148.912	1098.16	1419.46	269.334	348.767	536.111	372.227	781.082	1008.97	0.15:0.00:0.34:0.27:0.25:0.28:0.43:0.36:2.62:3.39:0.64:0.83:1.28:0.89:1.86:2.41	105.37	186.507	783.93	674.596	0.24:0.43:1.79:1.54	42244	Alpha-parvin OS=Homo sapiens OX=9606 GN=PARVA PE=1 SV=1
163	TRUE	Q96A65|EXOC4_HUMAN	47.31	27.52	21	21	Oxidation (M)	118.355	94.4458	117.777	204.526	122.738	137.02	173.479	415.721	6065.25	8668.11	1259.18	719.051	4619.31	2344.21	4652.24	4343.01	0.06:0.04:0.06:0.10:0.06:0.06:0.08:0.20:2.85:4.07:0.59:0.34:2.17:1.10:2.19:2.04	180.154	306.506	4277.46	4032.65	0.08:0.14:1.95:1.83	110498	Exocyst complex component 4 OS=Homo sapiens OX=9606 GN=EXOC4 PE=1 SV=1
279	TRUE	P18433|PTPRA_HUMAN	25.03	23.69	13	13	Oxidation (M)	881.17	884.642	2287.42	2023.6	815.158	1490.16	1349.5	1496.23	6437.95	9809.97	2376.82	1953.64	5953.14	3138.36	6101.79	7135.51	0.26:0.26:0.68:0.60:0.24:0.44:0.40:0.44:1.90:2.90:0.70:0.58:1.76:0.93:1.80:2.11	1519.21	1287.76	5144.59	5582.2	0.45:0.38:1.52:1.65	90719	Receptor-type tyrosine-protein phosphatase alpha OS=Homo sapiens OX=9606 GN=PTPRA PE=1 SV=3
836	TRUE	Q86SQ4|AGRG6_HUMAN	28.93	4.75	4	4		260.575	237.101	171.274	291.019	217.832	207.577	230.984	226.094	1594.36	1441.28	336.342	556.841	757.261	436.27	1265.65	1225.26	0.44:0.40:0.29:0.49:0.37:0.35:0.39:0.38:2.70:2.44:0.57:0.94:1.28:0.74:2.14:2.07	283.014	220.622	1067.37	921.11	0.45:0.35:1.71:1.48	136695	Adhesion G-protein coupled receptor G6 OS=Homo sapiens OX=9606 GN=ADGRG6 PE=1 SV=3
882	TRUE	Q9P0J7|KCMF1_HUMAN	50.17	8.4	3	3	Oxidation (M)	117.534	148.979	60.4149	102.296	127.699	153.322	77.6503	96.92	2812.24	1692.55	632.152	606.164	2567.79	721.553	1116.99	1058.78	0.16:0.20:0.08:0.14:0.17:0.20:0.10:0.13:3.72:2.24:0.84:0.80:3.40:0.95:1.48:1.40	107.306	113.898	1435.78	1366.28	0.14:0.15:1.90:1.81	41945	E3 ubiquitin-protein ligase KCMF1 OS=Homo sapiens OX=9606 GN=KCMF1 PE=1 SV=2
709	TRUE	P09493|TPM1_HUMAN	17.51	12.32	5	5	Oxidation (M)	552.433	4237.3	963.727	598.212	1238.79	685.874	4834.99	4572.18	10520.8	12222.3	2991.98	3086.82	8346.63	5753.18	6892.43	6344.96	0.12:0.92:0.21:0.13:0.27:0.15:1.05:0.99:2.28:2.65:0.65:0.67:1.81:1.25:1.49:1.37	2007.72	3792.58	7205.48	6834.3	0.40:0.76:1.45:1.38	32709	Tropomyosin alpha-1 chain OS=Homo sapiens OX=9606 GN=TPM1 PE=1 SV=2
292	TRUE	Q8NC51|PAIRB_HUMAN	45.69	37.99	13	13	Oxidation (M)	674.124	744.833	901.409	984.088	969.661	1018.53	1497.15	1349.25	45014.8	43434.8	4184.8	4281.11	37920.2	18419.4	23148.9	22102	0.05:0.06:0.07:0.08:0.08:0.08:0.12:0.10:3.49:3.36:0.32:0.33:2.94:1.43:1.79:1.71	826.114	1208.65	24356	25433.8	0.06:0.09:1.88:1.96	44965	Plasminogen activator inhibitor 1 RNA-binding protein OS=Homo sapiens OX=9606 GN=SERBP1 PE=1 SV=2
194	TRUE	Q9NXE4|NSMA3_HUMAN	79.35	22.4	16	16	Acetylation (N-term); Carbamidomethylation; Oxidation (M)	140.544	168.909	208.862	165.313	118.747	180.758	367.838	239.232	10165.5	47845.3	7774.65	7935.14	44214.8	15597.7	26413.3	32993.6	0.02:0.02:0.02:0.02:0.02:0.02:0.03:0.02:0.84:3.94:0.64:0.65:3.64:1.28:2.17:2.71	170.907	244.438	18430.1	29804.8	0.02:0.02:1.52:2.45	97810	Sphingomyelin phosphodiesterase 4 OS=Homo sapiens OX=9606 GN=SMPD4 PE=1 SV=3
598	TRUE	Q8N0X7|SPART_HUMAN	50.53	18.17	7	7		368.922	338.573	410.231	388.971	254.818	408.342	417.546	467.859	5616.4	6046.17	1380.02	1992.44	3488.91	2043.61	1862.44	2014.29	0.21:0.20:0.24:0.23:0.15:0.24:0.24:0.27:3.27:3.52:0.80:1.16:2.03:1.19:1.08:1.17	376.674	433.933	3758.76	2352.31	0.22:0.25:2.17:1.36	72833	Spartin OS=Homo sapiens OX=9606 GN=SPART PE=1 SV=1
386	TRUE	Q99714|HCD2_HUMAN	35.87	68.2	10	10	Oxidation (M)	232.589	184.415	280.739	381.738	174.839	246.142	339.404	320.126	5677.19	5723.4	569.062	856.182	5305.7	1560.13	4624.53	3545.91	0.12:0.10:0.15:0.20:0.09:0.13:0.18:0.17:3.03:3.05:0.30:0.46:2.83:0.83:2.46:1.89	289.337	287.951	3206.46	3759.07	0.15:0.15:1.70:1.99	26923	3-hydroxyacyl-CoA dehydrogenase type-2 OS=Homo sapiens OX=9606 GN=HSD17B10 PE=1 SV=3
111	TRUE	Q8TDM6|DLG5_HUMAN	36.01	19.49	29	29	Oxidation (M)	687.695	745.423	966.064	856.604	964.83	1120.26	1073.85	1102.83	4683.19	7855.7	997.149	1302.76	9919.32	5164.96	7616.58	7656.38	0.21:0.23:0.29:0.26:0.29:0.34:0.33:0.33:1.42:2.38:0.30:0.40:3.01:1.57:2.31:2.32	813.946	1065.44	3709.7	7589.31	0.25:0.32:1.13:2.30	213868	Disks large homolog 5 OS=Homo sapiens OX=9606 GN=DLG5 PE=1 SV=4
640	TRUE	Q13418|ILK_HUMAN	46.85	15.49	6	6	Oxidation (M)	317.081	436.167	442.79	458.309	392.845	528.637	476.603	481.814	6273.72	4698.35	1690.16	1425.89	1955.59	3983.88	1955.84	2121.6	0.18:0.25:0.26:0.27:0.23:0.31:0.28:0.28:3.63:2.72:0.98:0.83:1.13:2.31:1.13:1.23	431.822	469.975	3522.03	2504.23	0.25:0.27:2.03:1.45	51419	Integrin-linked protein kinase OS=Homo sapiens OX=9606 GN=ILK PE=1 SV=2
19	TRUE	Q14980|NUMA1_HUMAN	51.37	43.22	74	74	Carbamidomethylation; Oxidation (M)	159.686	160.367	359.819	336.087	324.682	289.365	448.895	439.91	19058.3	20797.1	2544.06	2297.37	11604.4	5079.7	14024.8	22039.1	0.03:0.03:0.06:0.05:0.05:0.05:0.07:0.07:3.05:3.33:0.41:0.37:1.86:0.81:2.24:3.53	281.821	375.713	11174.2	13187	0.05:0.06:1.79:2.11	238260	Nuclear mitotic apparatus protein 1 OS=Homo sapiens OX=9606 GN=NUMA1 PE=1 SV=2
837	TRUE	P36404|ARL2_HUMAN	45.87	36.41	5	5	Oxidation (M)	73.4825	87.5879	119.287	166.485	71.7031	134.187	146.814	146.586	3064.92	2685.14	586.509	590.772	778.668	1931.48	1299.77	3430.25	0.08:0.09:0.12:0.17:0.07:0.14:0.15:0.15:3.20:2.81:0.61:0.62:0.81:2.02:1.36:3.58	111.711	124.822	1748.28	1893.31	0.12:0.13:1.80:1.95	20878	ADP-ribosylation factor-like protein 2 OS=Homo sapiens OX=9606 GN=ARL2 PE=1 SV=4
388	TRUE	P52735|VAV2_HUMAN	42.86	12.3	9	9		339.613	200.775	307.193	279.333	336.304	325.587	293.985	335.979	6304.7	6567.49	844.435	1095.94	3197.68	2983.13	3538.53	2524.61	0.18:0.11:0.17:0.15:0.18:0.18:0.16:0.18:3.42:3.57:0.46:0.59:1.74:1.62:1.92:1.37	281.729	322.964	3926.61	3060.99	0.15:0.17:2.07:1.61	101289	Guanine nucleotide exchange factor VAV2 OS=Homo sapiens OX=9606 GN=VAV2 PE=1 SV=2
576	TRUE	Q8IXI1|MIRO2_HUMAN	62.03	15.86	7	6	Carbamidomethylation	0	51.9189	52.7718	0	62.531	75.4872	86.4161	61.2243	11229.9	11298.3	2051.18	2078.7	4817.9	3093.29	4625.34	4703.1	0.00:0.02:0.02:0.00:0.02:0.03:0.03:0.02:4.06:4.08:0.74:0.75:1.74:1.12:1.67:1.70	52.3454	71.4147	6664.51	4309.91	0.02:0.03:2.40:1.55	68118	Mitochondrial Rho GTPase 2 OS=Homo sapiens OX=9606 GN=RHOT2 PE=1 SV=2
750	TRUE	Q9UHQ9|NB5R1_HUMAN	53.42	28.52	6	6	Oxidation (M)	144.914	161.958	243.484	277.829	161.754	212.311	387.844	475.957	1324.15	1789.12	857.742	933.247	1862.09	1546.71	3507.88	4162.27	0.13:0.14:0.22:0.25:0.14:0.19:0.34:0.42:1.17:1.59:0.76:0.83:1.65:1.37:3.11:3.69	207.047	347.463	1226.07	2826.71	0.18:0.30:1.06:2.45	34095	NADH-cytochrome b5 reductase 1 OS=Homo sapiens OX=9606 GN=CYB5R1 PE=1 SV=1
474	TRUE	Q9HD67|MYO10_HUMAN	46.83	4.03	6	6	Oxidation (M)	91.0917	100.522	119.241	122.988	199.964	283.526	196.35	307.107	1283.58	1257.93	413.104	569.379	355.88	460.798	742.817	554.779	0.21:0.23:0.27:0.28:0.45:0.64:0.45:0.70:2.91:2.85:0.94:1.29:0.81:1.04:1.68:1.26	108.461	293.065	970.883	528.569	0.23:0.62:2.04:1.11	237347	Unconventional myosin-X OS=Homo sapiens OX=9606 GN=MYO10 PE=1 SV=3
377	TRUE	Q07666|KHDR1_HUMAN	29.76	27.54	10	10	Oxidation (M)	7590.39	7502.12	10696.6	10623.3	7350.56	10337.1	9605.49	8491.98	70331	76637.7	15657	15274.1	51243.7	23195	46165.3	45864.5	0.29:0.29:0.41:0.41:0.28:0.40:0.37:0.33:2.70:2.94:0.60:0.59:1.97:0.89:1.77:1.76	9103.09	8946.29	44474.9	41617.1	0.35:0.34:1.71:1.60	48227	KH domain-containing, RNA-binding, signal transduction-associated protein 1 OS=Homo sapiens OX=9606 GN=KHDRBS1 PE=1 SV=1
12	TRUE	Q8IVF2|AHNK2_HUMAN	66.14	20.97	88	88	Acetylation (N-term); Carbamidomethylation; Oxidation (M)	2733.41	1201.4	2347.35	2569.92	1588.88	3074.71	3050.59	3040.72	12154.8	11391.4	7476.31	6875.92	30534.3	19433.3	27235.6	37481.9	0.25:0.11:0.22:0.24:0.15:0.29:0.28:0.28:1.13:1.06:0.69:0.64:2.84:1.81:2.53:3.48	2213.02	2688.72	9474.61	28671.3	0.21:0.25:0.88:2.66	616629	Protein AHNAK2 OS=Homo sapiens OX=9606 GN=AHNAK2 PE=1 SV=2
789	TRUE	Q8N5A5|ZGPAT_HUMAN	29.55	9.98	4	4		276.692	147.134	0	269.368	283.775	186.577	402.261	249.654	1944.16	1812.59	675.672	666.771	855.703	1098.33	771.835	399.517	0.44:0.23:0.00:0.43:0.45:0.30:0.64:0.40:3.10:2.89:1.08:1.06:1.36:1.75:1.23:0.64	231.064	330.299	1404.54	866.256	0.33:0.47:1.98:1.22	57359	Zinc finger CCCH-type with G patch domain-containing protein OS=Homo sapiens OX=9606 GN=ZGPAT PE=1 SV=3
351	TRUE	Q92552|RT27_HUMAN	53.47	27.78	9	9	Carbamidomethylation; Oxidation (M)	158.408	164.882	299.803	263.524	219.616	177.607	229.079	269.336	13554.1	14868	1996.54	1554.99	8622.8	3914.67	6215.8	8354.64	0.04:0.04:0.08:0.07:0.06:0.05:0.06:0.07:3.56:3.91:0.52:0.41:2.27:1.03:1.63:2.20	221.655	223.909	7993.41	6776.98	0.06:0.06:2.10:1.78	47611	28S ribosomal protein S27, mitochondrial OS=Homo sapiens OX=9606 GN=MRPS27 PE=1 SV=3
371	TRUE	Q9Y5X1|SNX9_HUMAN	45.68	26.72	11	11	Oxidation (M)	318.829	346.748	428.214	434.637	661.445	738.513	851.503	714.902	4428.16	4391.83	891.467	764.953	7933.17	4304.57	7001.74	8499.68	0.12:0.13:0.16:0.16:0.25:0.28:0.32:0.27:1.66:1.65:0.33:0.29:2.97:1.61:2.62:3.18	382.107	741.591	2619.1	6934.79	0.14:0.28:0.98:2.60	66592	Sorting nexin-9 OS=Homo sapiens OX=9606 GN=SNX9 PE=1 SV=1
1061	TRUE	Q9BZM5|ULBP2_HUMAN	126.48	12.6	3	3		0	0	0	0	0	0	0	0	0	0	348.73	356.394	590.229	582.31	505.492	299.108	0.00:0.00:0.00:0.00:0.00:0.00:0.00:0.00:0.00:0.00:2.08:2.13:3.52:3.47:3.02:1.78	0	0	352.562	659.047	0.00:0.00:1.39:2.61	27368	UL16-binding protein 2 OS=Homo sapiens OX=9606 GN=ULBP2 PE=1 SV=1
720	TRUE	P35611|ADDA_HUMAN	42.93	6.38	4	4		93.0441	73.0036	169.162	205.408	396.046	399.205	465.24	389.846	2983.05	1797.8	630.686	672.82	1174.09	1442.81	780.441	1559.18	0.11:0.09:0.20:0.25:0.48:0.48:0.56:0.47:3.61:2.17:0.76:0.81:1.42:1.74:0.94:1.89	135.155	444.386	1521.09	1381.21	0.16:0.51:1.75:1.59	80955	Alpha-adducin OS=Homo sapiens OX=9606 GN=ADD1 PE=1 SV=2
416	TRUE	Q16181|SEPT7_HUMAN	25.31	26.09	8	8	Carbamidomethylation; Oxidation (M)	337.202	1011.53	1861.26	900.42	800.351	890.853	1162.02	980.111	11962	10913.1	1475.91	1224.91	11188	4340.66	7338.98	10135.2	0.08:0.24:0.45:0.22:0.19:0.21:0.28:0.24:2.88:2.62:0.35:0.29:2.69:1.04:1.77:2.44	1027.6	958.333	6393.97	8250.71	0.25:0.23:1.54:1.98	50680	Septin-7 OS=Homo sapiens OX=9606 GN=SEPTIN7 PE=1 SV=2
624	TRUE	Q9UQC9|CLCA2_HUMAN	22.42	9.97	6	6	Oxidation (M)	153.598	615.152	651.861	657.753	805.981	930.682	339.649	944.424	1214.12	1247.51	780.823	902.351	2016.03	1392.57	2613.86	1850.19	0.14:0.58:0.61:0.61:0.75:0.87:0.32:0.88:1.13:1.17:0.73:0.84:1.88:1.30:2.44:1.73	565.961	777.973	1036.2	1968.16	0.52:0.72:0.95:1.81	103941	Calcium-activated chloride channel regulator 2 OS=Homo sapiens OX=9606 GN=CLCA2 PE=1 SV=2
968	TRUE	Q7Z404|TMC4_HUMAN	84.35	6.04	3	3		0	0	0	0	0	0	0	0	259.893	265.319	71.7385	75.1892	560.125	84.7098	373.636	492.584	0.00:0.00:0.00:0.00:0.00:0.00:0.00:0.00:1.90:1.94:0.53:0.55:4.10:0.62:2.74:3.61	0	0	245.558	408.677	0.00:0.00:1.50:2.50	79208	Transmembrane channel-like protein 4 OS=Homo sapiens OX=9606 GN=TMC4 PE=1 SV=3
434	TRUE	O75038|PLCH2_HUMAN	23.67	10.03	10	10	Oxidation (M)	358.977	1848.46	427.548	224.001	547.815	777.814	779.713	797.037	5717.09	5857.01	1411.66	1150.3	2733.31	1898.53	3393.01	4360.57	0.18:0.92:0.21:0.11:0.27:0.39:0.39:0.40:2.83:2.90:0.70:0.57:1.35:0.94:1.68:2.16	714.746	776.551	3534.02	3096.36	0.35:0.38:1.74:1.52	154668	1-phosphatidylinositol 4,5-bisphosphate phosphodiesterase eta-2 OS=Homo sapiens OX=9606 GN=PLCH2 PE=1 SV=3
46	TRUE	P53396|ACLY_HUMAN	50.19	46.23	40	40	Carbamidomethylation; Oxidation (M)	3873.93	3856.46	2547.89	2823.11	5156.8	1774.47	1779.72	1726.06	127839	131375	15353.7	22886.8	69884.4	49604.7	50752.2	50599.3	0.11:0.11:0.08:0.08:0.15:0.05:0.05:0.05:3.77:3.88:0.45:0.68:2.06:1.46:1.50:1.49	3275.35	2609.26	74363.5	55210.2	0.10:0.08:2.20:1.63	120839	ATP-citrate synthase OS=Homo sapiens OX=9606 GN=ACLY PE=1 SV=3
161	TRUE	P63010|AP2B1_HUMAN	36.11	24.01	18	18	Carbamidomethylation; Oxidation (M)	282.214	804.896	886.448	832.762	1670.8	1325.42	1340.68	856.572	18629.5	17903.8	2391.25	2573.21	9418.23	6293.8	9635.1	10885.8	0.05:0.15:0.17:0.16:0.31:0.25:0.25:0.16:3.48:3.34:0.45:0.48:1.76:1.17:1.80:2.03	701.58	1298.37	10374.4	9058.23	0.13:0.24:1.94:1.69	104553	AP-2 complex subunit beta OS=Homo sapiens OX=9606 GN=AP2B1 PE=1 SV=1
216	TRUE	A0FGR8|ESYT2_HUMAN	50.37	26.17	16	16	Oxidation (M)	317.432	229.685	311.903	377.512	238.806	336.056	470.096	538.441	8823.88	8321.53	2266.01	1484.49	3337.1	2408.86	3675.3	3818.09	0.14:0.10:0.14:0.16:0.10:0.15:0.20:0.23:3.82:3.60:0.98:0.64:1.44:1.04:1.59:1.65	361.667	428.417	5223.98	3309.84	0.16:0.18:2.24:1.42	102357	Extended synaptotagmin-2 OS=Homo sapiens OX=9606 GN=ESYT2 PE=1 SV=1
493	TRUE	P61020|RAB5B_HUMAN	31.59	27.44	7	4	Oxidation (M)	259.337	306.948	683.391	509.047	1141.05	1251.85	1624.5	1317.83	3089.26	2690.87	870.17	725.776	2839.35	1891.64	3173.04	2816.64	0.16:0.19:0.43:0.32:0.72:0.80:1.03:0.84:1.96:1.71:0.55:0.46:1.80:1.20:2.02:1.79	510.906	1333.81	1844.02	2680.17	0.32:0.84:1.16:1.68	23707	Ras-related protein Rab-5B OS=Homo sapiens OX=9606 GN=RAB5B PE=1 SV=1
178	TRUE	Q9Y4B5|MTCL1_HUMAN	30.06	11.92	18	18	Oxidation (M)	299.284	302.287	386.213	385.72	649.889	341.252	544.277	475.12	3190.51	4005.14	576.421	620.66	1684.34	4458.36	3334.24	2150.21	0.20:0.21:0.26:0.26:0.44:0.23:0.37:0.32:2.18:2.74:0.39:0.42:1.15:3.05:2.28:1.47	343.376	502.635	2098.18	2906.79	0.23:0.34:1.43:1.99	209526	Microtubule cross-linking factor 1 OS=Homo sapiens OX=9606 GN=MTCL1 PE=1 SV=5
697	TRUE	P63167|DYL1_HUMAN	50.22	49.44	4	4	Carbamidomethylation; Oxidation (M)	476.238	360.839	1359.52	1652.49	1028.31	1415.73	4838.39	6142.22	147990	143392	20782.3	20540	83181.4	47899.8	54203	59761.8	0.02:0.02:0.04:0.04:0.03:0.04:0.13:0.17:3.98:3.86:0.56:0.55:2.24:1.29:1.46:1.61	962.273	3356.16	83414.2	61402.2	0.03:0.09:2.24:1.65	10366	Dynein light chain 1, cytoplasmic OS=Homo sapiens OX=9606 GN=DYNLL1 PE=1 SV=1
408	TRUE	Q15334|L2GL1_HUMAN	28.46	13.06	10	10	Carbamidomethylation; Oxidation (M)	0	0	142.655	89.1322	377.012	366.621	239.728	275.092	4983.75	3801.27	448.44	698.228	5516.12	1221.99	3016.96	4927.08	0.00:0.00:0.09:0.05:0.23:0.22:0.15:0.17:3.05:2.33:0.27:0.43:3.38:0.75:1.85:3.02	144.097	356.637	2482.92	3670.54	0.09:0.21:1.49:2.21	115418	Lethal(2) giant larvae protein homolog 1 OS=Homo sapiens OX=9606 GN=LLGL1 PE=1 SV=3
480	TRUE	Q9H6S3|ES8L2_HUMAN	34.44	21.68	9	9	Oxidation (M)	914.404	137.752	403.191	379.191	1303.58	566.004	323.57	590.274	1693.53	2099.39	673.959	1088.8	4744.58	3261.28	3366.16	4370.85	0.56:0.09:0.25:0.23:0.80:0.35:0.20:0.36:1.05:1.30:0.42:0.67:2.93:2.01:2.08:2.70	489.898	770.733	1388.92	3935.72	0.30:0.47:0.84:2.39	80621	Epidermal growth factor receptor kinase substrate 8-like protein 2 OS=Homo sapiens OX=9606 GN=EPS8L2 PE=1 SV=2
350	TRUE	Q96QT4|TRPM7_HUMAN	29.77	8.58	11	11	Oxidation (M)	131.832	136.468	138.63	154.843	135.61	100.518	174.723	189.834	1745.87	1318.58	235.187	255.058	1272.91	530.481	772.759	1181.28	0.25:0.26:0.26:0.29:0.26:0.19:0.33:0.36:3.30:2.49:0.44:0.48:2.40:1.00:1.46:2.23	140.443	165.989	888.673	939.357	0.26:0.31:1.67:1.76	212697	Transient receptor potential cation channel subfamily M member 7 OS=Homo sapiens OX=9606 GN=TRPM7 PE=1 SV=1
959	TRUE	Q14244|MAP7_HUMAN	31.57	4.67	3	3	Acetylation (N-term)	58.9822	0	104.193	99.8575	0	91.5669	69.6454	111.812	957.101	1131.26	185.782	215	1896.93	1640.34	887.111	550.084	0.12:0.00:0.21:0.20:0.00:0.18:0.14:0.22:1.91:2.26:0.37:0.43:3.79:3.28:1.77:1.10	87.6776	91.0082	1052.42	1556.04	0.13:0.13:1.51:2.23	84052	Ensconsin OS=Homo sapiens OX=9606 GN=MAP7 PE=1 SV=1
345	TRUE	P28290|ITPI2_HUMAN	23.9	10.8	10	10	Oxidation (M)	335.644	435.502	437.615	172.18	259.338	618.847	583.693	583.309	3548.33	3850.47	518.108	559.54	2041.73	1655.57	2219.02	2913.32	0.26:0.34:0.34:0.13:0.20:0.48:0.45:0.45:2.74:2.97:0.40:0.43:1.58:1.28:1.71:2.25	345.235	567.932	2119.11	2207.41	0.26:0.43:1.62:1.69	138386	Protein ITPRID2 OS=Homo sapiens OX=9606 GN=ITPRID2 PE=1 SV=3
552	TRUE	Q13636|RAB31_HUMAN	37.24	37.63	6	5	Oxidation (M)	852.312	670.339	885.223	762.446	970.335	926.455	908.583	1026.99	4041.12	3817.31	1694.76	1687.36	2211.69	2040.98	1324.64	1695.39	0.53:0.42:0.56:0.48:0.61:0.58:0.57:0.64:2.53:2.39:1.06:1.06:1.39:1.28:0.83:1.06	792.58	958.091	2810.14	1818.17	0.50:0.60:1.76:1.14	21569	Ras-related protein Rab-31 OS=Homo sapiens OX=9606 GN=RAB31 PE=1 SV=1
317	TRUE	Q9HCK8|CHD8_HUMAN	38.75	5.93	11	11	Acetylation (N-term); Oxidation (M)	122.711	166.511	150.657	157.102	267.654	211.615	313.241	292.816	2851.73	2032.31	634.514	451.211	1574.71	853.942	769.249	1863.73	0.15:0.21:0.19:0.20:0.34:0.27:0.39:0.37:3.59:2.56:0.80:0.57:1.98:1.07:0.97:2.35	188.501	271.332	1625.33	1265.41	0.23:0.32:1.94:1.51	290519	Chromodomain-helicase-DNA-binding protein 8 OS=Homo sapiens OX=9606 GN=CHD8 PE=1 SV=5
550	TRUE	Q8N884|CGAS_HUMAN	26.36	17.24	8	8	Oxidation (M)	349.983	151.152	768.195	786.819	398.837	1303.97	297.382	166.365	6722.66	7093.88	1398.12	1380.08	3640.63	1529.31	3783.73	3802.85	0.17:0.07:0.37:0.37:0.19:0.62:0.14:0.08:3.20:3.38:0.67:0.66:1.73:0.73:1.80:1.81	580.919	573.38	4148.69	3189.13	0.27:0.27:1.95:1.50	58814	Cyclic GMP-AMP synthase OS=Homo sapiens OX=9606 GN=CGAS PE=1 SV=2
1070	TRUE	P55283|CADH4_HUMAN	97.97	2.62	3	2		0	0	0	0	0	0	0	0	177.691	56.6873	223.782	0	498.207	424.956	324.277	201.839	0.00:0.00:0.00:0.00:0.00:0.00:0.00:0.00:1.49:0.48:1.88:0.00:4.18:3.56:2.72:1.69	0	0	229.08	362.32	0.00:0.00:1.55:2.45	100281	Cadherin-4 OS=Homo sapiens OX=9606 GN=CDH4 PE=2 SV=2
570	TRUE	Q93052|LPP_HUMAN	31.9	22.06	8	8	Oxidation (M)	154.909	114.484	489.419	445.712	280.169	337.355	637.909	398.362	5193.62	4241.02	773.584	620.125	6270.2	1752.73	3870.89	6667.03	0.08:0.06:0.24:0.22:0.14:0.17:0.32:0.20:2.58:2.10:0.38:0.31:3.11:0.87:1.92:3.31	350.504	413.449	2707.09	4640.22	0.17:0.20:1.33:2.29	65746	Lipoma-preferred partner OS=Homo sapiens OX=9606 GN=LPP PE=1 SV=1
645	TRUE	Q12986|NFX1_HUMAN	67.03	7.5	6	6	Oxidation (M)	158.663	143.122	268.578	275.222	237.912	338.08	511.117	487.596	3339.36	3166.96	4782.99	4530.15	1071.36	869.695	1936.81	759.195	0.11:0.10:0.19:0.19:0.17:0.24:0.36:0.34:2.34:2.21:3.35:3.17:0.75:0.61:1.35:0.53	211.396	408.656	3954.87	1159.26	0.15:0.29:2.76:0.81	124395	Transcriptional repressor NF-X1 OS=Homo sapiens OX=9606 GN=NFX1 PE=1 SV=2
80	TRUE	P07900|HS90A_HUMAN	33.51	21.17	32	14	Carbamidomethylation; Oxidation (M)	3080.25	3495.37	5588.12	6091.17	3593.28	6506.12	6331.05	5808.27	49644	35475.1	11497.8	11958.2	23108.7	11679.7	20083.7	24905.1	0.22:0.24:0.39:0.43:0.25:0.45:0.44:0.41:3.47:2.48:0.80:0.84:1.62:0.82:1.40:1.74	4563.73	5559.68	27143.8	19944.3	0.32:0.39:1.90:1.39	84660	Heat shock protein HSP 90-alpha OS=Homo sapiens OX=9606 GN=HSP90AA1 PE=1 SV=5
1074	TRUE	Q08334|I10R2_HUMAN	48.7	11.08	3	3	Oxidation (M)	420.913	355.73	550.657	496.772	498.234	1130.05	736.365	661.622	1708.41	1912.34	1301.87	1267.56	4934.93	2057.14	1897.11	2979.94	0.29:0.25:0.38:0.35:0.35:0.79:0.51:0.46:1.19:1.34:0.91:0.89:3.45:1.44:1.32:2.08	456.018	756.567	1547.54	2967.28	0.32:0.53:1.08:2.07	36995	Interleukin-10 receptor subunit beta OS=Homo sapiens OX=9606 GN=IL10RB PE=1 SV=2
615	TRUE	O14763|TR10B_HUMAN	40.8	18.18	6	6	Oxidation (M)	1089.54	913.017	2012.36	2317.61	1292.86	813.498	705.906	646.824	8766.63	9015.22	12613.9	12528.8	3752.12	20336.2	2481.53	4861.82	0.21:0.17:0.38:0.44:0.25:0.15:0.13:0.12:1.67:1.71:2.40:2.38:0.71:3.87:0.47:0.92	1583.13	864.771	10731.1	7857.92	0.30:0.16:2.04:1.49	47878	Tumor necrosis factor receptor superfamily member 10B OS=Homo sapiens OX=9606 GN=TNFRSF10B PE=1 SV=2
200	TRUE	Q14247|SRC8_HUMAN	29.54	39.27	19	19	Carbamidomethylation; Oxidation (M)	827.222	782.856	613.464	1977.3	1013.04	1321.9	616.424	958.378	16784.3	14326.1	1463.17	2114.71	16330.4	8070.44	7243.26	7832.32	0.16:0.15:0.12:0.38:0.20:0.26:0.12:0.19:3.26:2.79:0.28:0.41:3.18:1.57:1.41:1.52	1084.74	977.435	8672.09	9869.1	0.21:0.19:1.68:1.92	61586	Src substrate cortactin OS=Homo sapiens OX=9606 GN=CTTN PE=1 SV=2
28	TRUE	Q14517|FAT1_HUMAN	30.22	17.22	59	59	Oxidation (M)	1388.03	1085.55	1740.97	2726.84	1079.36	1768.09	908.989	909.251	12711.2	11338.9	3046.72	2669.7	5114.63	8917.67	3963.62	5817.75	0.34:0.27:0.43:0.67:0.26:0.43:0.22:0.22:3.12:2.78:0.75:0.66:1.26:2.19:0.97:1.43	1805.65	1166.42	7441.61	5953.42	0.44:0.29:1.82:1.45	506273	Protocadherin Fat 1 OS=Homo sapiens OX=9606 GN=FAT1 PE=1 SV=2
1097	TRUE	Q13322|GRB10_HUMAN	27.99	4.88	2	2	Oxidation (M)	0	0	109.647	120.612	60.8258	50.0411	57.761	108.836	503.843	733.277	206.957	193.658	168.29	216.393	284.243	329.55	0.00:0.00:0.56:0.61:0.31:0.25:0.29:0.55:2.56:3.73:1.05:0.99:0.86:1.10:1.45:1.68	115.129	112.859	520.604	282.161	0.45:0.44:2.02:1.09	67231	Growth factor receptor-bound protein 10 OS=Homo sapiens OX=9606 GN=GRB10 PE=1 SV=2
428	TRUE	Q96JJ7|TMX3_HUMAN	95.82	23.35	9	9	Oxidation (M)	271.682	317.925	423.216	419.836	439.872	399.612	393.847	372.629	2538.98	2665.65	3387.71	3244.47	899.774	986.258	961.905	790.15	0.23:0.27:0.37:0.36:0.38:0.35:0.34:0.32:2.19:2.30:2.93:2.80:0.78:0.85:0.83:0.68	358.165	430.399	2959.2	909.522	0.31:0.37:2.54:0.78	51872	Protein disulfide-isomerase TMX3 OS=Homo sapiens OX=9606 GN=TMX3 PE=1 SV=2
1169	TRUE	Q8IYB5|SMAP1_HUMAN	29.29	4.93	2	2		81.4003	58.009	88.7832	50.4685	106.798	89.1743	345.61	278.093	838.266	1159.1	183.102	269.126	1050.89	349.564	649.114	525.653	0.21:0.15:0.23:0.13:0.28:0.23:0.90:0.73:2.19:3.03:0.48:0.70:2.75:0.91:1.70:1.37	69.6652	243.063	684.68	711.904	0.16:0.57:1.60:1.67	50386	Stromal membrane-associated protein 1 OS=Homo sapiens OX=9606 GN=SMAP1 PE=1 SV=2
542	TRUE	Q9ULF5|S39AA_HUMAN	21.73	14.2	9	9	Carbamidomethylation	2321.14	2494.85	6830.16	7365.19	5837.24	8455.36	2706.36	2277.68	29552	29384.3	8855.24	9628.07	14009.4	9011.17	14187.6	15930.4	0.22:0.24:0.65:0.70:0.55:0.80:0.26:0.22:2.80:2.78:0.84:0.91:1.33:0.85:1.34:1.51	4793.72	4819.16	19637.8	13347.7	0.45:0.45:1.84:1.25	94132	Zinc transporter ZIP10 OS=Homo sapiens OX=9606 GN=SLC39A10 PE=1 SV=2
1013	TRUE	P49755|TMEDA_HUMAN	27.47	14.61	3	3	Oxidation (M)	326.873	300.162	450.077	491.693	678.106	523.89	1315.81	1205.8	5047.95	5957.23	988.273	998.944	3857.23	1321.69	5591.44	4556.3	0.16:0.14:0.21:0.23:0.32:0.25:0.63:0.57:2.40:2.84:0.47:0.48:1.84:0.63:2.66:2.17	426.276	1015.19	3330.4	3921.38	0.20:0.47:1.53:1.80	24976	Transmembrane emp24 domain-containing protein 10 OS=Homo sapiens OX=9606 GN=TMED10 PE=1 SV=2
601	TRUE	P33121|ACSL1_HUMAN	25.08	11.03	7	7	Acetylation (N-term); Oxidation (M)	202.955	230.598	300.001	358.107	393.218	170.563	482.717	424.781	2852.42	2800.18	452.926	523.315	2680.79	847.745	1601.08	1889.14	0.20:0.23:0.30:0.35:0.39:0.17:0.48:0.42:2.82:2.76:0.45:0.52:2.65:0.84:1.58:1.86	331.211	438.731	2188.12	1754.69	0.28:0.37:1.86:1.49	77943	Long-chain-fatty-acid--CoA ligase 1 OS=Homo sapiens OX=9606 GN=ACSL1 PE=1 SV=1
649	TRUE	Q9H2K8|TAOK3_HUMAN	46.26	6.35	4	4		237.657	229.779	256.011	91.2206	288.358	211.898	543.868	399.569	905.644	1358.29	563.851	585.645	2477.69	1158.66	2584.83	2879.12	0.26:0.25:0.28:0.10:0.31:0.23:0.59:0.43:0.98:1.47:0.61:0.63:2.68:1.25:2.80:3.12	232.832	427.599	1051.63	2275.07	0.23:0.43:1.06:2.28	105406	Serine/threonine-protein kinase TAO3 OS=Homo sapiens OX=9606 GN=TAOK3 PE=1 SV=2
270	TRUE	P26038|MOES_HUMAN	14.05	20.1	13	9	Oxidation (M)	31290.5	30097.3	28797.3	28161.4	30096.5	27665.9	23878.6	22397.4	3183.17	3697.01	20813.5	21418.7	16732.5	20702	28237.6	10224.5	1.44:1.39:1.33:1.30:1.39:1.27:1.10:1.03:0.15:0.17:0.96:0.99:0.77:0.95:1.30:0.47	29586.6	26009.6	12770.3	18974.1	1.35:1.19:0.58:0.87	67820	Moesin OS=Homo sapiens OX=9606 GN=MSN PE=1 SV=3
1207	TRUE	Q13488|VPP3_HUMAN	12.41	3.25	2	2		51.31	0	0	82.0592	250.85	241.012	183.648	158.624	839.883	986.946	50.3805	202.625	747.11	393.698	559.206	628.25	0.15:0.00:0.00:0.24:0.75:0.72:0.55:0.47:2.50:2.94:0.15:0.60:2.22:1.17:1.66:1.87	66.6846	257.981	570.192	582.066	0.18:0.70:1.54:1.58	92968	V-type proton ATPase 116 kDa subunit a3 OS=Homo sapiens OX=9606 GN=TCIRG1 PE=1 SV=3
1005	TRUE	Q9BYI3|HYCCI_HUMAN	33.48	10.56	3	3	Oxidation (M)	117.206	106.289	147.708	90.1693	120.093	176.372	248.5	205.742	1436.25	1660.11	286.47	362.753	671.174	483.377	718.364	1187.29	0.23:0.21:0.29:0.18:0.24:0.35:0.50:0.41:2.87:3.31:0.57:0.72:1.34:0.96:1.43:2.37	157.964	250.173	1268.82	877.093	0.25:0.39:1.99:1.37	57625	Hyccin OS=Homo sapiens OX=9606 GN=FAM126A PE=1 SV=2
657	TRUE	P49841|GSK3B_HUMAN	25.53	21.9	6	6	Oxidation (M)	309.672	291.192	569.784	369.959	791.518	1020.54	497.797	579.955	3729.64	4049.27	854.925	664.158	2751.78	1210.68	2485.69	2420.34	0.22:0.21:0.40:0.26:0.56:0.72:0.35:0.41:2.64:2.87:0.61:0.47:1.95:0.86:1.76:1.71	385.152	967.002	2608.95	2217.12	0.25:0.63:1.69:1.44	46744	Glycogen synthase kinase-3 beta OS=Homo sapiens OX=9606 GN=GSK3B PE=1 SV=2
397	TRUE	O95297|MPZL1_HUMAN	13.62	33.09	12	12	Carbamidomethylation	7283.55	7088	19861.9	19750.9	23025.3	26642.4	4754.75	9068.9	42539.3	66784.3	16455.4	16844.6	45836.1	25223	43462.5	48991.2	0.28:0.27:0.75:0.75:0.87:1.01:0.18:0.34:1.61:2.52:0.62:0.64:1.73:0.95:1.64:1.85	13496.1	15914.5	35695.7	40908	0.51:0.60:1.35:1.54	29082	Myelin protein zero-like protein 1 OS=Homo sapiens OX=9606 GN=MPZL1 PE=1 SV=1
372	TRUE	P04626|ERBB2_HUMAN	54.11	8.45	11	9	Oxidation (M)	67.8353	63.3825	177.751	96.6137	158.758	199.866	247.145	243.862	2309.34	1457.11	882.276	1161.43	1740.4	796.823	3470.23	4835.19	0.06:0.06:0.16:0.09:0.14:0.18:0.22:0.22:2.06:1.30:0.79:1.04:1.55:0.71:3.10:4.32	169.483	212.408	1481.59	2746.35	0.15:0.18:1.29:2.38	137910	Receptor tyrosine-protein kinase erbB-2 OS=Homo sapiens OX=9606 GN=ERBB2 PE=1 SV=1
517	TRUE	Q9ULG1|INO80_HUMAN	36.88	4.69	6	6		109.94	197.932	105.92	55.8047	170.172	317.542	0	0	2195.2	1973.86	677.447	662.96	659.049	539.156	628.622	810.12	0.19:0.35:0.19:0.10:0.30:0.56:0.00:0.00:3.86:3.47:1.19:1.17:1.16:0.95:1.10:1.42	117.399	243.857	1377.37	659.237	0.20:0.41:2.30:1.10	176753	Chromatin-remodeling ATPase INO80 OS=Homo sapiens OX=9606 GN=INO80 PE=1 SV=2
538	TRUE	P51153|RAB13_HUMAN	49.66	33.99	5	5	Oxidation (M)	2641.92	2784.17	3834.7	3705.18	2940.33	2748.15	2202.09	2240.83	6184.56	11285.5	4049.28	3285.99	18983.3	15428	12511.8	17877.9	0.38:0.40:0.54:0.53:0.42:0.39:0.31:0.32:0.88:1.60:0.57:0.47:2.69:2.19:1.78:2.54	3241.49	2532.85	6201.34	16200.2	0.46:0.36:0.88:2.30	22774	Ras-related protein Rab-13 OS=Homo sapiens OX=9606 GN=RAB13 PE=1 SV=1
440	TRUE	P51149|RAB7A_HUMAN	26.75	60.39	10	10	Oxidation (M)	1526.66	1547.59	6134.8	5992.22	8714.83	9532.95	9811.05	9311.23	15426.3	14764.3	6574.78	6491.09	15562.6	12866.9	18548.4	22068.8	0.15:0.15:0.60:0.58:0.85:0.93:0.95:0.90:1.50:1.43:0.64:0.63:1.51:1.25:1.80:2.14	3800.32	9342.51	10814.1	17261.7	0.37:0.91:1.05:1.68	23490	Ras-related protein Rab-7a OS=Homo sapiens OX=9606 GN=RAB7A PE=1 SV=1
986	TRUE	P63165|SUMO1_HUMAN	51.01	27.72	2	2	Acetylation (N-term)	0	0	0	55.9923	67.2018	93.6173	132.921	121.882	8715.08	8204.9	997.133	872.206	3445.74	1526.02	4574.01	6014.48	0.00:0.00:0.00:0.03:0.03:0.04:0.06:0.06:4.00:3.77:0.46:0.40:1.58:0.70:2.10:2.76	55.9923	103.905	4764.86	3964.87	0.03:0.05:2.14:1.78	11557	Small ubiquitin-related modifier 1 OS=Homo sapiens OX=9606 GN=SUMO1 PE=1 SV=1
540	TRUE	P04632|CPNS1_HUMAN	30.7	37.31	6	6	Acetylation (N-term); Carbamidomethylation; Oxidation (M)	371.843	288.48	622.366	567.227	838.341	864.148	736.574	768.345	2739.99	2299.32	984.908	1012.89	4268.25	1086.07	2057.78	2785.89	0.27:0.21:0.45:0.41:0.60:0.62:0.53:0.55:1.97:1.65:0.71:0.73:3.06:0.78:1.48:2.00	492.749	801.852	1759.28	2549.5	0.35:0.57:1.26:1.82	28316	Calpain small subunit 1 OS=Homo sapiens OX=9606 GN=CAPNS1 PE=1 SV=1
1053	TRUE	Q15014|MO4L2_HUMAN	12.36	12.85	3	3	Oxidation (M)	1239.32	365.644	425.656	526.651	1142.51	1584.36	677.194	290.683	2324.66	3114.25	1625.84	585.454	1916.32	933.538	2666.65	2491.85	0.91:0.27:0.31:0.38:0.83:1.16:0.49:0.21:1.70:2.27:1.19:0.43:1.40:0.68:1.95:1.82	660.033	975.226	1912.55	2002.09	0.48:0.70:1.38:1.44	32308	Mortality factor 4-like protein 2 OS=Homo sapiens OX=9606 GN=MORF4L2 PE=1 SV=1
869	TRUE	O15120|PLCB_HUMAN	32.5	16.55	4	4	Oxidation (M)	264.559	178.533	377.056	337.791	651.727	704.148	494.154	504.668	2094.7	2749.05	907.543	796.476	1381.92	658.224	1749.32	984.468	0.29:0.19:0.41:0.36:0.70:0.76:0.53:0.54:2.26:2.97:0.98:0.86:1.49:0.71:1.89:1.06	289.485	588.674	1636.94	1193.48	0.31:0.63:1.77:1.29	30914	1-acyl-sn-glycerol-3-phosphate acyltransferase beta OS=Homo sapiens OX=9606 GN=AGPAT2 PE=1 SV=1
565	TRUE	Q9Y4F1|FARP1_HUMAN	34.07	5.93	5	5		864.3	840.599	313.354	266.176	1725.64	1045.37	436.944	1703.07	3574.79	4071.29	1134.31	1227.1	9100.5	4286.46	5832.87	6414.73	0.32:0.31:0.12:0.10:0.64:0.39:0.16:0.64:1.34:1.52:0.42:0.46:3.40:1.60:2.18:2.40	571.107	1227.76	2501.87	6408.64	0.21:0.46:0.93:2.39	118633	FERM, ARHGEF and pleckstrin domain-containing protein 1 OS=Homo sapiens OX=9606 GN=FARP1 PE=1 SV=1
79	TRUE	Q07157|ZO1_HUMAN	15.96	26.09	31	31	Oxidation (M)	972.928	5315.28	1139.44	902.319	2737.45	1597.87	1573.3	2250.74	9719.14	10335	1758.08	2630.48	6413.62	3987.18	8182.63	9204.25	0.23:1.24:0.27:0.21:0.64:0.37:0.37:0.52:2.26:2.41:0.41:0.61:1.49:0.93:1.91:2.14	2082.49	2130.24	6110.67	6946.92	0.48:0.49:1.42:1.61	195459	Tight junction protein ZO-1 OS=Homo sapiens OX=9606 GN=TJP1 PE=1 SV=3
681	TRUE	P62491|RB11A_HUMAN	20.61	30.56	6	6	Acetylation (N-term)	3873.85	604.093	1262.33	1645.65	2734.57	3486.34	3453.43	3304.23	8737.48	8552.25	2672.16	1638.23	9598.94	5668.63	9775.23	11730.7	0.79:0.12:0.26:0.33:0.56:0.71:0.70:0.67:1.78:1.74:0.54:0.33:1.95:1.15:1.99:2.38	1846.48	3244.64	5400.03	9193.39	0.38:0.66:1.10:1.87	24394	Ras-related protein Rab-11A OS=Homo sapiens OX=9606 GN=RAB11A PE=1 SV=3
732	TRUE	Q01831|XPC_HUMAN	41.14	7.02	5	5	Oxidation (M)	137.559	227.722	59.1008	120.633	97.7603	115.87	153.473	184.271	1754.26	2428.51	5351.35	5321.74	546.996	7529.74	6488.64	758.037	0.07:0.12:0.03:0.06:0.05:0.06:0.08:0.09:0.90:1.24:2.74:2.72:0.28:3.85:3.32:0.39	161.61	158.812	4154.7	3830.85	0.08:0.08:2.00:1.84	105953	DNA repair protein complementing XP-C cells OS=Homo sapiens OX=9606 GN=XPC PE=1 SV=4
557	TRUE	Q13557|KCC2D_HUMAN	82.75	18.24	7	7	Oxidation (M)	666.388	653.666	988.256	1330.16	579.175	695.676	1137.62	928.78	6271.44	6037.88	4243.14	4123.16	17775	13577.4	24023.7	25387.4	0.10:0.10:0.15:0.20:0.09:0.10:0.17:0.14:0.93:0.89:0.63:0.61:2.62:2.00:3.55:3.75	956.288	835.313	5168.91	20190.8	0.14:0.12:0.76:2.97	56369	Calcium/calmodulin-dependent protein kinase type II subunit delta OS=Homo sapiens OX=9606 GN=CAMK2D PE=1 SV=3
502	TRUE	Q9BW04|SARG_HUMAN	47.02	17.97	7	7		0	61.6875	94.0825	134.368	205.185	78.9414	249.198	366.331	2906.85	3282.53	384.934	622.444	7743.42	4255.77	8002.6	8179.2	0.00:0.03:0.04:0.06:0.09:0.03:0.11:0.16:1.27:1.44:0.17:0.27:3.39:1.86:3.50:3.58	96.7128	356.576	1910.07	7045.25	0.04:0.15:0.81:3.00	63964	Specifically androgen-regulated gene protein OS=Homo sapiens OX=9606 GN=SARG PE=1 SV=2
941	TRUE	Q9UMX0|UBQL1_HUMAN	30.06	5.77	3	3		58.7162	69.2475	131.882	136.695	95.6015	94.6101	300.583	232.44	546.217	309.231	143.059	168.822	628.322	545.335	524.824	896.143	0.19:0.23:0.43:0.45:0.31:0.31:0.99:0.76:1.79:1.01:0.47:0.55:2.06:1.79:1.72:2.94	99.135	229.567	388.333	699.016	0.28:0.65:1.10:1.97	62519	Ubiquilin-1 OS=Homo sapiens OX=9606 GN=UBQLN1 PE=1 SV=2
888	TRUE	Q658P3|STEA3_HUMAN	24.25	9.84	4	4		376.683	301.179	701.705	759.854	543.792	515.169	782.32	722.265	3693.15	3673.27	1295	796.12	1574.86	1060.67	2285.78	2090.2	0.28:0.23:0.53:0.57:0.41:0.39:0.59:0.55:2.79:2.78:0.98:0.60:1.19:0.80:1.73:1.58	552.306	640.886	2364.39	1752.88	0.42:0.48:1.78:1.32	54601	Metalloreductase STEAP3 OS=Homo sapiens OX=9606 GN=STEAP3 PE=1 SV=2
107	TRUE	O15294|OGT1_HUMAN	39.02	27.72	25	25	Acetylation (N-term); Oxidation (M)	142.238	271.536	385.861	289.463	280.706	408.003	893.603	993.391	19068.1	19896.3	1407.22	1839.2	12511	5330.67	8414.13	10143.9	0.03:0.05:0.08:0.06:0.05:0.08:0.17:0.19:3.71:3.87:0.27:0.36:2.43:1.04:1.64:1.97	294.898	643.926	10552.7	9099.92	0.06:0.13:2.05:1.77	116925	UDP-N-acetylglucosamine--peptide N-acetylglucosaminyltransferase 110 kDa subunit OS=Homo sapiens OX=9606 GN=OGT PE=1 SV=3
105	TRUE	Q00341|VIGLN_HUMAN	23.69	25.79	25	25	Acetylation (N-term); Oxidation (M)	321.393	1404.75	1318.96	1641.65	6783.28	8309.81	353.981	2008.25	10860.4	10966	16619.3	16881	36500	5318.51	19014.7	7665.54	0.04:0.15:0.14:0.18:0.74:0.91:0.04:0.22:1.19:1.20:1.82:1.85:4.00:0.58:2.08:0.84	1171.69	4414.28	13831.7	17124.7	0.13:0.48:1.51:1.87	141456	Vigilin OS=Homo sapiens OX=9606 GN=HDLBP PE=1 SV=2
54	TRUE	P08238|HS90B_HUMAN	51.75	36.19	43	25	Carbamidomethylation; Oxidation (M)	4599.61	5362.77	13427.6	15175.4	5391.29	8638.43	8294.9	8667.12	260096	235914	61435.8	61252.5	99039.6	68537.3	66695.9	83366.5	0.07:0.09:0.21:0.24:0.09:0.14:0.13:0.14:4.14:3.75:0.98:0.97:1.58:1.09:1.06:1.33	9641.36	7747.94	154674	79409.8	0.15:0.12:2.46:1.26	83264	Heat shock protein HSP 90-beta OS=Homo sapiens OX=9606 GN=HSP90AB1 PE=1 SV=4
276	TRUE	P78310|CXAR_HUMAN	20.51	52.05	13	13	Acetylation (N-term); Carbamidomethylation; Oxidation (M)	3504.03	2600.89	1161.72	4665.74	5085.38	5060.36	1581.19	4919.19	5293.22	5039.04	11502.1	3453.16	12232.2	7519.79	13267	14220.6	0.55:0.41:0.18:0.74:0.80:0.80:0.25:0.78:0.84:0.80:1.82:0.55:1.94:1.19:2.10:2.25	2983.1	4161.53	6321.89	11809.9	0.47:0.66:1.00:1.87	40030	Coxsackievirus and adenovirus receptor OS=Homo sapiens OX=9606 GN=CXADR PE=1 SV=1
617	TRUE	Q13325|IFIT5_HUMAN	99.52	15.15	6	6		61.5512	79.3902	142.116	110.534	139.421	98.2359	128.287	104.824	1082.8	728.764	982.225	881.135	5431.77	4159.46	4045.2	3134.72	0.05:0.06:0.11:0.08:0.10:0.07:0.10:0.08:0.81:0.55:0.74:0.66:4.08:3.12:3.04:2.35	98.3977	117.692	1025.23	4448.07	0.07:0.08:0.72:3.13	55847	Interferon-induced protein with tetratricopeptide repeats 5 OS=Homo sapiens OX=9606 GN=IFIT5 PE=1 SV=1
190	TRUE	Q8TDW0|LRC8C_HUMAN	25.15	26.53	19	17	Carbamidomethylation; Oxidation (M)	1421.63	1420.09	6425.83	6577.78	1527.87	2128.84	2708.04	4082.38	38616.3	36411.4	6474.99	7125.72	22370.8	9420.99	17601.8	18815.4	0.12:0.12:0.56:0.57:0.13:0.19:0.24:0.36:3.37:3.18:0.57:0.62:1.95:0.82:1.54:1.64	3961.33	2611.78	22157.1	17052.2	0.35:0.23:1.94:1.49	92450	Volume-regulated anion channel subunit LRRC8C OS=Homo sapiens OX=9606 GN=LRRC8C PE=1 SV=2
106	TRUE	Q92817|EVPL_HUMAN	26.02	16.18	25	25		130.349	232.482	433.604	481.652	282.618	386.058	2639.15	2499.68	1274.74	1373.08	2400.04	2478.33	4955.37	2390.65	2670.17	3351.26	0.07:0.13:0.25:0.28:0.16:0.22:1.51:1.43:0.73:0.79:1.37:1.42:2.83:1.37:1.53:1.92	338.971	1451.87	1881.55	3341.86	0.19:0.83:1.07:1.91	231604	Envoplakin OS=Homo sapiens OX=9606 GN=EVPL PE=1 SV=3
482	TRUE	P51572|BAP31_HUMAN	29	28.86	6	6	Oxidation (M)	76.3484	128.487	210.856	216.964	197.865	266.659	1095.48	1096.14	6795.47	6365.48	681.111	598.019	6324.36	1361	4671.86	8153.04	0.03:0.05:0.09:0.09:0.08:0.11:0.46:0.46:2.84:2.66:0.28:0.25:2.65:0.57:1.95:3.41	216.273	853.459	3610.02	5187.91	0.09:0.35:1.46:2.10	27992	B-cell receptor-associated protein 31 OS=Homo sapiens OX=9606 GN=BCAP31 PE=1 SV=3
349	TRUE	Q5H9R7|PP6R3_HUMAN	32	15.23	11	11	Carbamidomethylation; Oxidation (M)	508.778	377.949	677.349	429.044	592.294	786.118	302.465	240.971	7957.03	7433.21	1149.49	1237.62	6016.82	3269.24	2496.18	2690.01	0.23:0.17:0.30:0.19:0.26:0.35:0.13:0.11:3.52:3.29:0.51:0.55:2.66:1.45:1.10:1.19	516.372	480.462	4444.34	3618.06	0.23:0.21:1.96:1.60	97669	Serine/threonine-protein phosphatase 6 regulatory subunit 3 OS=Homo sapiens OX=9606 GN=PPP6R3 PE=1 SV=2
96	TRUE	Q29RF7|PDS5A_HUMAN	38.92	26.93	27	27	Carbamidomethylation; Oxidation (M)	524.873	291.18	891.721	1047.61	421.292	427.013	1292.21	506.415	13610.9	12601.1	34666.8	1455.71	13812.3	7250.24	10287.9	11821.6	0.08:0.04:0.13:0.15:0.06:0.06:0.19:0.07:1.96:1.82:5.00:0.21:1.99:1.05:1.48:1.71	688.847	661.734	15583.6	10793	0.10:0.10:2.25:1.56	150830	Sister chromatid cohesion protein PDS5 homolog A OS=Homo sapiens OX=9606 GN=PDS5A PE=1 SV=1
439	TRUE	P11274|BCR_HUMAN	24.9	7	9	8	Oxidation (M)	252.21	396.93	663.397	609.814	502.07	414.628	607.969	547.072	3320.92	3515.79	740.217	851.439	1683.74	1213.91	1581.27	1973.3	0.21:0.34:0.56:0.52:0.43:0.35:0.52:0.46:2.82:2.98:0.63:0.72:1.43:1.03:1.34:1.67	598.024	535.183	2107.09	1613.06	0.49:0.44:1.74:1.33	142819	Breakpoint cluster region protein OS=Homo sapiens OX=9606 GN=BCR PE=1 SV=2
534	TRUE	P06213|INSR_HUMAN	51.48	1.59	6	2		261.361	301.472	394.609	362.89	503.243	577.52	820.057	1375.68	111680	1864.86	19782	20105.8	46440.9	42966.5	53920.2	53427.3	0.02:0.02:0.02:0.02:0.02:0.03:0.04:0.06:5.04:0.08:0.89:0.91:2.09:1.94:2.43:2.41	330.083	819.126	38358.2	49188.7	0.02:0.04:1.73:2.22	156333	Insulin receptor OS=Homo sapiens OX=9606 GN=INSR PE=1 SV=4
659	TRUE	Q01844|EWS_HUMAN	37.34	7.62	4	4	Oxidation (M)	1163.38	3804.19	951.182	4858.89	2833.83	4579.13	1023.59	1128.26	64701.1	63255.4	13388.8	12601.8	29424	15263.1	19283.7	25934.7	0.07:0.23:0.06:0.29:0.17:0.28:0.06:0.07:3.92:3.83:0.81:0.76:1.78:0.92:1.17:1.57	2694.41	2391.2	38486.8	22476.4	0.16:0.14:2.33:1.36	68478	RNA-binding protein EWS OS=Homo sapiens OX=9606 GN=EWSR1 PE=1 SV=1
140	TRUE	Q9UHB6|LIMA1_HUMAN	37.88	40.05	25	25	Oxidation (M)	1466.89	1686.11	4356.22	4482.85	2368.69	3073	3370.08	3107.08	72673.3	79175.5	9235.61	10794.4	40983.8	23340	29591.2	30654.8	0.07:0.08:0.22:0.22:0.12:0.15:0.17:0.16:3.63:3.95:0.46:0.54:2.05:1.17:1.48:1.53	2998.02	2979.71	42969.7	31142.4	0.15:0.15:2.15:1.56	85226	LIM domain and actin-binding protein 1 OS=Homo sapiens OX=9606 GN=LIMA1 PE=1 SV=1
466	TRUE	P46459|NSF_HUMAN	35.09	17.2	10	10	Oxidation (M)	201.64	107.223	165.329	215.39	189.098	296.742	690.887	595.719	5211.47	6356.51	740.227	913.037	3251.36	1197.46	3075.98	2799.39	0.12:0.07:0.10:0.13:0.12:0.18:0.43:0.37:3.21:3.91:0.46:0.56:2.00:0.74:1.89:1.72	267.407	484.747	3305.31	2581.05	0.16:0.29:1.99:1.56	82594	Vesicle-fusing ATPase OS=Homo sapiens OX=9606 GN=NSF PE=1 SV=3
75	TRUE	O95425|SVIL_HUMAN	62.88	20.51	32	32	Carbamidomethylation; Oxidation (M)	875.29	850.98	1349.36	1337.32	1033.84	1642.12	1351.64	1423.26	9038.58	8096.82	9461.73	10780.5	2024.41	1539.14	3285.33	3959.09	0.24:0.23:0.37:0.37:0.28:0.45:0.37:0.39:2.49:2.23:2.61:2.97:0.56:0.42:0.91:1.09	1103.24	1362.72	9344.41	2701.99	0.30:0.38:2.58:0.74	247746	Supervillin OS=Homo sapiens OX=9606 GN=SVIL PE=1 SV=2
791	TRUE	Q7KYR7|BT2A1_HUMAN	21.31	11.2	4	4	Oxidation (M)	360.41	360.794	186.52	255.578	426.046	285.453	602.002	587.177	3042.1	2854.82	356.552	492.882	2007.95	1143.01	1547.59	1804.42	0.35:0.35:0.18:0.25:0.42:0.28:0.59:0.58:2.98:2.80:0.35:0.48:1.97:1.12:1.52:1.77	313.163	475.169	1720.56	1706.15	0.30:0.45:1.63:1.62	59633	Butyrophilin subfamily 2 member A1 OS=Homo sapiens OX=9606 GN=BTN2A1 PE=1 SV=3
223	TRUE	Q92859|NEO1_HUMAN	69.54	11.23	12	12	Oxidation (M)	211.625	94.5035	0	50.2922	259.074	192.284	141.429	176.812	976.79	1251.48	825.639	845.775	5617.4	3171.27	4881.3	4514.47	0.15:0.07:0.00:0.03:0.18:0.13:0.10:0.12:0.67:0.86:0.57:0.58:3.87:2.19:3.36:3.11	178.21	262.487	974.92	4546.11	0.12:0.18:0.65:3.05	160017	Neogenin OS=Homo sapiens OX=9606 GN=NEO1 PE=1 SV=2
854	TRUE	Q96IF1|AJUBA_HUMAN	35.25	8.92	4	4	Oxidation (M)	82.529	116.385	53.4167	0	74.3781	272.792	0	58.3988	1835.77	281.08	489.908	430.603	3064.46	1202.43	1178.77	1877.54	0.12:0.17:0.08:0.00:0.11:0.40:0.00:0.08:2.67:0.41:0.71:0.63:4.45:1.75:1.71:2.73	84.1102	135.19	829.832	1920.99	0.11:0.18:1.12:2.59	56934	LIM domain-containing protein ajuba OS=Homo sapiens OX=9606 GN=AJUBA PE=1 SV=1
334	TRUE	Q8N1W1|ARG28_HUMAN	39.44	9.68	11	11	Oxidation (M)	157.3	135.078	131.182	139.899	156.708	129.838	306.749	190.716	2552.16	3747	457.648	760.867	1407.34	630.393	1746.31	1426.5	0.18:0.15:0.15:0.16:0.18:0.15:0.35:0.22:2.90:4.26:0.52:0.86:1.60:0.72:1.99:1.62	140.865	243.939	2326.85	1302.64	0.14:0.24:2.32:1.30	191891	Rho guanine nucleotide exchange factor 28 OS=Homo sapiens OX=9606 GN=ARHGEF28 PE=1 SV=3
275	TRUE	O14936|CSKP_HUMAN	24.89	16.31	11	11		133.371	205.066	357.47	519.626	1388.91	1222.03	526.358	440.356	2334.54	2046.59	639.057	299.164	2829.29	1680.91	3520.09	3059.09	0.10:0.15:0.27:0.39:1.05:0.92:0.40:0.33:1.76:1.54:0.48:0.23:2.14:1.27:2.66:2.31	460.565	1080.94	1667.74	2948.6	0.30:0.70:1.08:1.92	105123	Peripheral plasma membrane protein CASK OS=Homo sapiens OX=9606 GN=CASK PE=1 SV=3
90	TRUE	Q15075|EEA1_HUMAN	16.62	29.06	32	32	Oxidation (M)	307.912	399.545	894.364	913.868	451.736	684.997	1719.79	2158.4	3710.23	3279.7	1048.48	1037.96	4255.12	1269.62	3070.45	3134.16	0.17:0.23:0.50:0.52:0.26:0.39:0.97:1.22:2.09:1.85:0.59:0.59:2.40:0.72:1.73:1.77	659.183	1253.73	2269.09	2932.34	0.37:0.70:1.28:1.65	162466	Early endosome antigen 1 OS=Homo sapiens OX=9606 GN=EEA1 PE=1 SV=2
231	TRUE	Q92797|SYMPK_HUMAN	33.36	16.8	15	15	Oxidation (M)	260.464	233.407	178.695	155.747	155.724	158.59	273.187	225.663	6846.32	6873.67	641.843	409.013	5292.77	1710.56	3160.7	3342.17	0.14:0.12:0.10:0.08:0.08:0.08:0.15:0.12:3.66:3.68:0.34:0.22:2.83:0.91:1.69:1.79	226.313	203.291	3692.71	3376.55	0.12:0.11:1.97:1.80	141148	Symplekin OS=Homo sapiens OX=9606 GN=SYMPK PE=1 SV=2
287	TRUE	Q04917|1433F_HUMAN	42.69	30.89	7	7	Oxidation (M)	1831.04	2676.06	5107.19	4952.19	10226.2	11466.9	14006.6	13217.4	15895.1	15892.7	8405.1	7505.33	23247.7	18508.8	18230	18325.1	0.15:0.23:0.43:0.42:0.86:0.97:1.18:1.12:1.34:1.34:0.71:0.63:1.96:1.56:1.54:1.55	3735.84	12229.3	11924.6	19577.9	0.31:1.03:1.00:1.65	28219	14-3-3 protein eta OS=Homo sapiens OX=9606 GN=YWHAH PE=1 SV=4
305	TRUE	P18085|ARF4_HUMAN	60.07	31.67	9	6	Carbamidomethylation; Oxidation (M)	491.062	197.154	848.486	753.889	740.861	804.116	810.369	758.865	39004.4	34551.9	8927.07	9230.29	16679.9	7930.96	8976.49	9758.99	0.06:0.02:0.10:0.09:0.08:0.09:0.09:0.09:4.44:3.94:1.02:1.05:1.90:0.90:1.02:1.11	572.648	778.553	22997.8	10897.4	0.06:0.09:2.61:1.24	20511	ADP-ribosylation factor 4 OS=Homo sapiens OX=9606 GN=ARF4 PE=1 SV=3
678	TRUE	P40818|UBP8_HUMAN	40.94	3.4	3	3	Oxidation (M)	124.711	131.476	65.2523	68.4252	129.005	68.251	74.1149	0	2047.51	1967.4	424.746	413.959	736.846	612.781	635.667	676.561	0.24:0.26:0.13:0.13:0.25:0.13:0.15:0.00:4.01:3.85:0.83:0.81:1.44:1.20:1.24:1.32	130.541	90.4571	1269.83	665.464	0.24:0.17:2.36:1.23	127523	Ubiquitin carboxyl-terminal hydrolase 8 OS=Homo sapiens OX=9606 GN=USP8 PE=1 SV=1
290	TRUE	Q86SQ0|PHLB2_HUMAN	38.45	11.73	11	11	Oxidation (M)	71.3457	125.242	553.015	504.992	371.183	873.212	211.694	175.787	1634.76	5214.27	2506.07	2500.62	11579.5	6500.51	9327.66	1861.27	0.03:0.05:0.20:0.18:0.13:0.32:0.08:0.06:0.59:1.90:0.91:0.91:4.21:2.36:3.39:0.68	433.452	561.098	2963.93	7317.24	0.15:0.20:1.05:2.60	142158	Pleckstrin homology-like domain family B member 2 OS=Homo sapiens OX=9606 GN=PHLDB2 PE=1 SV=2
300	TRUE	Q96NY8|NECT4_HUMAN	54.17	31.76	12	12	Oxidation (M)	179.022	162.719	301.29	215.678	276.503	252.561	312.034	404.699	2221.21	8833.14	1012.79	1049.71	12094.6	3951.93	9318.69	11307.3	0.06:0.05:0.09:0.07:0.09:0.08:0.10:0.12:0.68:2.72:0.31:0.32:3.73:1.22:2.87:3.49	255.167	386.933	3279.21	9168.13	0.08:0.12:1.00:2.80	55454	Nectin-4 OS=Homo sapiens OX=9606 GN=NECTIN4 PE=1 SV=1
158	TRUE	O14974|MYPT1_HUMAN	46.89	22.04	18	18	Carbamidomethylation; Oxidation (M)	283.315	252.432	152.403	135.474	374.539	677.255	615.775	409.738	25448.6	10807	13144.4	1807.59	19047.6	11599.5	2872.26	3453.1	0.05:0.04:0.03:0.02:0.07:0.12:0.11:0.07:4.47:1.90:2.31:0.32:3.35:2.04:0.50:0.61	259.559	519.327	13417.3	9328.34	0.04:0.09:2.28:1.59	115281	Protein phosphatase 1 regulatory subunit 12A OS=Homo sapiens OX=9606 GN=PPP1R12A PE=1 SV=1
135	TRUE	P53675|CLH2_HUMAN	18.62	4.82	20	5	Carbamidomethylation	768.07	947.053	391.16	1914.19	540.819	556.693	1245.75	1111.72	7876.56	8058.71	1045.4	1008.88	3638.29	4073.01	4378.58	4238.98	0.29:0.36:0.15:0.73:0.21:0.21:0.48:0.43:3.02:3.09:0.40:0.39:1.39:1.56:1.68:1.62	1105.38	878.626	4797.93	4136.78	0.40:0.32:1.76:1.52	187030	Clathrin heavy chain 2 OS=Homo sapiens OX=9606 GN=CLTCL1 PE=1 SV=2
52	TRUE	Q5UIP0|RIF1_HUMAN	45.27	26.17	46	46	Oxidation (M)	286.964	311.767	368.294	325.881	376.792	470.579	541.177	548.286	22083.1	25761.3	2048.93	1909.44	11954.5	6962.44	9092.34	11402.3	0.05:0.05:0.06:0.06:0.06:0.08:0.09:0.09:3.74:4.36:0.35:0.32:2.03:1.18:1.54:1.93	323.227	484.208	13558.3	9900.69	0.05:0.08:2.23:1.63	274466	Telomere-associated protein RIF1 OS=Homo sapiens OX=9606 GN=RIF1 PE=1 SV=2
957	TRUE	Q9H444|CHM4B_HUMAN	34.43	15.62	3	3		286.967	293.741	387.533	385.496	656.788	827.688	1033.32	875.202	2063.71	1506.34	916.104	791.081	2655.34	853.386	1208.62	1350.63	0.29:0.29:0.39:0.38:0.65:0.82:1.03:0.87:2.05:1.50:0.91:0.79:2.64:0.85:1.20:1.34	338.434	848.248	1319.31	1516.99	0.34:0.84:1.31:1.51	24950	Charged multivesicular body protein 4b OS=Homo sapiens OX=9606 GN=CHMP4B PE=1 SV=1
32	TRUE	Q14573|ITPR3_HUMAN	20.89	22.76	49	45	Carbamidomethylation; Oxidation (M)	1363.55	4362.5	679.036	752.683	165.589	4362.39	287.54	312.802	19578.1	18555.4	2007.7	2068.3	13684.8	8409.18	9870.61	6316.98	0.24:0.75:0.12:0.13:0.03:0.75:0.05:0.05:3.38:3.20:0.35:0.36:2.36:1.45:1.70:1.09	1789.44	1637.79	10552.4	9570.38	0.30:0.28:1.79:1.63	304106	Inositol 1,4,5-trisphosphate receptor type 3 OS=Homo sapiens OX=9606 GN=ITPR3 PE=1 SV=2
405	TRUE	P20339|RAB5A_HUMAN	20.48	27.44	7	4	Oxidation (M)	434.507	689.278	1270.83	1338.5	690.284	1566.19	1963.24	1724	7517.53	11310.9	1355.45	1180.27	5362.32	3956.81	5966.52	9334.47	0.12:0.20:0.37:0.38:0.20:0.45:0.56:0.50:2.16:3.25:0.39:0.34:1.54:1.14:1.72:2.68	933.28	1485.93	5341.04	6155.03	0.27:0.43:1.54:1.77	23659	Ras-related protein Rab-5A OS=Homo sapiens OX=9606 GN=RAB5A PE=1 SV=2
262	TRUE	O00468|AGRIN_HUMAN	23.23	8.8	13	13		5902.74	6245.41	8451.06	7867.76	3715.51	4199.92	1083.16	2294.93	1038	594.22	2478.12	2508.91	3455.42	1152.71	1173.26	1199.57	1.77:1.87:2.53:2.36:1.11:1.26:0.32:0.69:0.31:0.18:0.74:0.75:1.04:0.35:0.35:0.36	7116.74	2823.38	1654.81	1745.24	2.13:0.85:0.50:0.52	217320	Agrin OS=Homo sapiens OX=9606 GN=AGRN PE=1 SV=6
773	TRUE	Q6IQ22|RAB12_HUMAN	36.31	14.34	3	3		540.451	501.838	420.363	559.004	725.207	674.196	622.538	492.613	2522.99	2778.71	902.334	3676.11	1430.59	861.667	1442.52	1202.21	0.45:0.41:0.35:0.46:0.60:0.56:0.51:0.41:2.09:2.30:0.75:3.04:1.18:0.71:1.19:0.99	505.414	628.638	2470.04	1234.25	0.42:0.52:2.04:1.02	27248	Ras-related protein Rab-12 OS=Homo sapiens OX=9606 GN=RAB12 PE=1 SV=3
771	TRUE	O95786|DDX58_HUMAN	49.28	6.05	4	4		83.6295	90.0182	80.118	85.3845	67.2776	79.7705	218.753	203.06	364.8	516.587	154.499	167.438	1127.03	1045.03	950.372	1468.44	0.20:0.21:0.19:0.20:0.16:0.19:0.52:0.48:0.87:1.23:0.37:0.40:2.69:2.49:2.27:3.51	84.7875	183.219	417.976	1203	0.18:0.39:0.89:2.55	106600	Antiviral innate immune response receptor RIG-I OS=Homo sapiens OX=9606 GN=DDX58 PE=1 SV=2
595	TRUE	O00299|CLIC1_HUMAN	25.54	30.29	7	6	Carbamidomethylation; Oxidation (M)	1517.99	2092.72	3445.83	3571.27	6244.62	7811.28	7834.21	7459.88	24966.2	24778.2	4634.07	4997.59	20066.5	12572.4	12406.2	14269.4	0.15:0.21:0.35:0.36:0.63:0.79:0.79:0.75:2.52:2.50:0.47:0.50:2.02:1.27:1.25:1.44	2656.95	7337.5	14844	14828.6	0.27:0.74:1.50:1.50	26923	Chloride intracellular channel protein 1 OS=Homo sapiens OX=9606 GN=CLIC1 PE=1 SV=4
23	TRUE	P05787|K2C8_HUMAN	30.87	61.28	55	40	Acetylation (N-term); Oxidation (M)	9568.38	8829.19	12034.8	8766.43	8326.99	16544.5	28594.6	33463.7	218777	222887	30199.7	35791.8	91576.1	57522.7	98048.8	122114	0.15:0.14:0.19:0.14:0.13:0.26:0.46:0.53:3.49:3.56:0.48:0.57:1.46:0.92:1.56:1.95	9799.69	21732.4	126914	92315.4	0.16:0.35:2.02:1.47	53704	Keratin, type II cytoskeletal 8 OS=Homo sapiens OX=9606 GN=KRT8 PE=1 SV=7
348	TRUE	P40763|STAT3_HUMAN	31.27	19.09	10	10	Oxidation (M)	102.742	139.029	251.439	191.013	216.607	215.736	248.475	208.037	2176.03	2508.33	585.5	427.227	1445.84	404.687	1023.55	935.668	0.15:0.20:0.36:0.28:0.31:0.31:0.36:0.30:3.14:3.62:0.85:0.62:2.09:0.58:1.48:1.35	241.957	249.314	1881.84	1039.26	0.28:0.29:2.21:1.22	88068	Signal transducer and activator of transcription 3 OS=Homo sapiens OX=9606 GN=STAT3 PE=1 SV=2
1000	TRUE	Q13642|FHL1_HUMAN	62.83	11.15	3	3	Carbamidomethylation	161.034	159.849	217.11	194.55	253.074	272.036	361.486	255.24	9723.31	8421.7	1812.84	2695.4	3122.33	3197.02	1821.72	2190.2	0.07:0.07:0.10:0.09:0.12:0.12:0.17:0.12:4.46:3.87:0.83:1.24:1.43:1.47:0.84:1.01	183.136	313.885	5930.08	2582.82	0.08:0.14:2.63:1.15	36263	Four and a half LIM domains protein 1 OS=Homo sapiens OX=9606 GN=FHL1 PE=1 SV=4
354	TRUE	P51148|RAB5C_HUMAN	15.85	44.44	9	6	Oxidation (M)	2058.66	2293.03	6787.86	6407.32	7591.62	9832.1	6011.25	5816.19	24851.5	24875.2	5746.15	4413.28	19728.1	10428.2	16508.2	21087.5	0.19:0.21:0.62:0.59:0.70:0.90:0.55:0.53:2.28:2.28:0.53:0.40:1.81:0.96:1.51:1.93	4386.72	7312.79	14971.5	16938	0.40:0.67:1.37:1.55	23483	Ras-related protein Rab-5C OS=Homo sapiens OX=9606 GN=RAB5C PE=1 SV=2
170	TRUE	O43157|PLXB1_HUMAN	26.28	12.74	20	19	Carbamidomethylation; Oxidation (M)	132.143	210.801	550.161	277.933	397.273	2924.49	237.207	262.833	1291.4	4080.81	680.662	1626.58	2920.68	2063.03	5312.3	5478.15	0.07:0.12:0.31:0.16:0.22:1.64:0.13:0.15:0.73:2.30:0.38:0.91:1.64:1.16:2.99:3.08	317.906	955.451	1919.86	3943.54	0.18:0.54:1.08:2.21	232298	Plexin-B1 OS=Homo sapiens OX=9606 GN=PLXNB1 PE=1 SV=3
128	TRUE	P04792|HSPB1_HUMAN	56.33	84.39	23	23	Oxidation (M)	2107.19	1844.69	1460.63	1778.94	4984.98	6348.25	77423	65959	81541.8	76533.3	72923.2	73892.3	363425	320490	458640	408835	0.02:0.02:0.02:0.02:0.04:0.05:0.61:0.52:0.65:0.61:0.58:0.59:2.88:2.54:3.64:3.24	1849.27	38678.8	76222.6	387847	0.02:0.31:0.60:3.07	22783	Heat shock protein beta-1 OS=Homo sapiens OX=9606 GN=HSPB1 PE=1 SV=2
857	TRUE	O15431|COPT1_HUMAN	31.24	15.79	2	2	Carbamidomethylation; Oxidation (M)	4091.08	789.454	1352.14	1249.23	1095.78	3322.63	2142.78	6295.68	29153.8	33860.3	8067.91	11255.2	5130.95	9255.97	11360.2	15385.5	0.46:0.09:0.15:0.14:0.12:0.37:0.24:0.70:3.24:3.77:0.90:1.25:0.57:1.03:1.26:1.71	1870.48	3214.22	20584.3	10283.2	0.21:0.36:2.29:1.14	21091	High affinity copper uptake protein 1 OS=Homo sapiens OX=9606 GN=SLC31A1 PE=1 SV=1
705	TRUE	Q13546|RIPK1_HUMAN	84.45	6.41	3	3		0	0	0	0	0	0	76.6786	64.8217	476.561	594.731	1165.11	1219.26	939.245	3415.04	713.585	942.394	0.00:0.00:0.00:0.00:0.00:0.00:0.13:0.11:0.79:0.99:1.94:2.03:1.56:5.69:1.19:1.57	0	70.7502	1001.95	1502.57	0.00:0.11:1.56:2.33	75931	Receptor-interacting serine/threonine-protein kinase 1 OS=Homo sapiens OX=9606 GN=RIPK1 PE=1 SV=3
1086	TRUE	Q9H9K5|MER34_HUMAN	26.62	4.44	2	2		470.26	455.367	559.588	763.659	500.658	748.65	386.179	350.522	4670.51	4402.06	858.73	971.587	2449.25	2146.85	1353.03	1878.76	0.33:0.32:0.39:0.53:0.35:0.52:0.27:0.24:3.25:3.07:0.60:0.68:1.71:1.50:0.94:1.31	562.218	496.502	2725.72	1956.97	0.39:0.35:1.90:1.36	63547	Endogenous retroviral envelope protein HEMO OS=Homo sapiens OX=9606 GN=ERVMER34-1 PE=1 SV=1
114	TRUE	O95714|HERC2_HUMAN	37.4	7.26	27	27	Oxidation (M)	173.561	147.862	155.601	208.29	144.253	166.582	198.729	150.92	3064.74	3772.57	453.922	488.541	1122.15	1055.24	1402.17	1863.45	0.19:0.16:0.17:0.23:0.16:0.18:0.22:0.17:3.37:4.14:0.50:0.54:1.23:1.16:1.54:2.05	171.328	165.121	2737.35	1360.75	0.15:0.15:2.47:1.23	527228	E3 ubiquitin-protein ligase HERC2 OS=Homo sapiens OX=9606 GN=HERC2 PE=1 SV=2
784	TRUE	P36897|TGFR1_HUMAN	40.9	11.53	4	4	Oxidation (M)	297.628	67.686	371.451	280.363	475.213	396.362	293.513	420.304	7196.97	4007.5	1406.02	1424.77	2118.93	2070.22	2316.98	1596.51	0.19:0.04:0.24:0.18:0.31:0.26:0.19:0.27:4.65:2.59:0.91:0.92:1.37:1.34:1.50:1.03	302.284	414.593	3508.81	2025.66	0.19:0.27:2.25:1.30	55960	TGF-beta receptor type-1 OS=Homo sapiens OX=9606 GN=TGFBR1 PE=1 SV=1
301	TRUE	P42892|ECE1_HUMAN	19.34	23.25	12	12	Oxidation (M)	1027.67	1446.83	1213.81	1322.79	1018.16	1749.99	1721.53	1802.45	6643.2	5982.49	1848.01	1689.55	3284.31	2092.96	6079.77	7629.84	0.35:0.50:0.42:0.45:0.35:0.60:0.59:0.62:2.28:2.06:0.64:0.58:1.13:0.72:2.09:2.62	1252.78	1573.03	4040.81	4771.72	0.43:0.54:1.39:1.64	87164	Endothelin-converting enzyme 1 OS=Homo sapiens OX=9606 GN=ECE1 PE=1 SV=2
764	TRUE	Q15691|MARE1_HUMAN	24.6	21.27	5	5		381.059	321.102	438.332	665.634	630.751	901.425	1516.46	1168.28	1673.75	2264.49	888.864	608.903	1707.78	1302.92	1531.28	1690.41	0.34:0.29:0.40:0.60:0.57:0.82:1.37:1.06:1.51:2.05:0.80:0.55:1.54:1.18:1.38:1.53	472.6	1054.23	1359	1558.1	0.43:0.95:1.22:1.40	29999	Microtubule-associated protein RP/EB family member 1 OS=Homo sapiens OX=9606 GN=MAPRE1 PE=1 SV=3
928	TRUE	Q14232|EI2BA_HUMAN	29.23	15.08	3	3		96.7488	57.6667	395.769	360.416	124.633	221.796	279.765	186.191	3294.37	2795.76	655.528	657.813	1461.94	775.735	906.24	1212.6	0.11:0.07:0.47:0.43:0.15:0.26:0.33:0.22:3.91:3.32:0.78:0.78:1.73:0.92:1.08:1.44	263.076	232.594	1914.97	1115.3	0.30:0.26:2.17:1.27	33712	Translation initiation factor eIF-2B subunit alpha OS=Homo sapiens OX=9606 GN=EIF2B1 PE=1 SV=1
26	TRUE	O60437|PEPL_HUMAN	31.95	48.01	72	72	Carbamidomethylation; Oxidation (M)	1341.7	1244.09	2142.9	2366.81	3804.03	4508.6	5011.22	5340.97	3236.75	1739.12	10311.8	9852.27	15632.8	8908.31	15150.8	18163.9	0.20:0.18:0.32:0.35:0.56:0.66:0.74:0.79:0.48:0.26:1.52:1.45:2.30:1.31:2.23:2.67	1830.65	4724.61	6353.2	14464	0.27:0.69:0.93:2.11	204747	Periplakin OS=Homo sapiens OX=9606 GN=PPL PE=1 SV=4
845	TRUE	P56962|STX17_HUMAN	11.41	20.53	3	3		0	0	70.399	75.5315	0	55.1634	87.914	0	1188.26	1307.99	237.794	65.2296	926.755	181.508	1088.96	2073.26	0.00:0.00:0.15:0.16:0.00:0.12:0.19:0.00:2.58:2.84:0.52:0.14:2.02:0.39:2.37:4.51	72.9652	71.5387	1244.19	1465.61	0.10:0.10:1.74:2.05	33403	Syntaxin-17 OS=Homo sapiens OX=9606 GN=STX17 PE=1 SV=2
824	TRUE	Q92542|NICA_HUMAN	63.71	8.04	4	4	Oxidation (M)	232.571	191.896	142.164	137.322	564.409	470.737	242.786	235.884	722.096	922.638	643.611	764.708	3405.55	2150	3345.61	1639.37	0.24:0.19:0.14:0.14:0.57:0.48:0.25:0.24:0.73:0.93:0.65:0.77:3.45:2.18:3.39:1.66	214.544	516.408	954.951	2702.54	0.20:0.47:0.87:2.46	78411	Nicastrin OS=Homo sapiens OX=9606 GN=NCSTN PE=1 SV=2
684	TRUE	Q9UP95|S12A4_HUMAN	48.34	3.23	5	3		0	0	202.331	63.5729	0	0	0	0	3039.39	3177.06	123.986	143.678	1442.97	451.984	1710.88	2515.56	0.00:0.00:0.25:0.08:0.00:0.00:0.00:0.00:3.78:3.95:0.15:0.18:1.79:0.56:2.13:3.13	162.52	0	2830.3	1555.19	0.14:0.00:2.49:1.37	120650	Solute carrier family 12 member 4 OS=Homo sapiens OX=9606 GN=SLC12A4 PE=1 SV=2
89	TRUE	Q5JTH9|RRP12_HUMAN	60.41	32.15	29	29	Carbamidomethylation; Oxidation (M)	165.408	328.491	208.002	140.016	186.957	78.3499	405.475	69.1422	53400.2	53819.4	5357.59	5928.5	21484.8	11476.1	18183.1	22201.7	0.02:0.03:0.02:0.02:0.02:0.02:0.03:0.02:4.42:4.45:0.44:0.49:1.78:0.95:1.50:1.84	297.404	225.313	29626.4	18336.4	0.02:0.02:2.44:1.51	143702	RRP12-like protein OS=Homo sapiens OX=9606 GN=RRP12 PE=1 SV=2
512	TRUE	Q13421|MSLN_HUMAN	95.46	11.9	8	8		211.415	190.487	292.714	329.756	435.079	556.94	380.333	377.926	3708.23	3539.28	1600.35	1884.83	19258.8	13323.3	15057.5	16576.4	0.04:0.04:0.06:0.07:0.09:0.11:0.08:0.08:0.76:0.73:0.33:0.39:3.96:2.74:3.10:3.41	256.093	437.569	2683.17	16054	0.05:0.09:0.55:3.30	68986	Mesothelin OS=Homo sapiens OX=9606 GN=MSLN PE=1 SV=2
492	TRUE	Q12933|TRAF2_HUMAN	16.14	20.36	8	8	Carbamidomethylation; Oxidation (M)	1220.56	1803.7	1777.47	1486.01	673.117	413.126	1498.52	2208.55	5798.5	6029.2	1223.52	897.467	8221.35	3902.72	3686.33	5782.59	0.42:0.62:0.61:0.51:0.23:0.14:0.51:0.76:1.99:2.07:0.42:0.31:2.82:1.34:1.27:1.98	1571.93	1198.33	3487.17	5398.25	0.54:0.41:1.20:1.85	55859	TNF receptor-associated factor 2 OS=Homo sapiens OX=9606 GN=TRAF2 PE=1 SV=2
330	TRUE	P19634|SL9A1_HUMAN	11.95	14.85	10	10	Oxidation (M)	1836.61	1338.96	7705.2	6740.07	3867.78	5293.17	2787.52	3007.38	20488	18282.2	4029.83	3279.44	14326.3	6830.17	14239.1	13946.5	0.23:0.17:0.96:0.84:0.48:0.66:0.35:0.38:2.56:2.29:0.50:0.41:1.79:0.85:1.78:1.74	4405.21	3738.96	11519.9	12335.5	0.55:0.47:1.44:1.54	90763	Sodium/hydrogen exchanger 1 OS=Homo sapiens OX=9606 GN=SLC9A1 PE=1 SV=2
956	TRUE	O14939|PLD2_HUMAN	30.51	5.04	3	3		83.6656	55.8679	110.559	117.191	194.569	176.077	238.833	369.647	1513.51	1941.96	267.821	269.724	833.023	523.049	696.697	1109.29	0.16:0.11:0.21:0.22:0.37:0.33:0.45:0.70:2.85:3.65:0.50:0.51:1.57:0.98:1.31:2.09	91.821	264.415	1100.13	903.791	0.16:0.45:1.86:1.53	105987	Phospholipase D2 OS=Homo sapiens OX=9606 GN=PLD2 PE=1 SV=2
404	TRUE	Q8WVM8|SCFD1_HUMAN	21.38	21.81	9	9	Oxidation (M)	560.389	452.757	396.032	519.549	538.076	860.156	1038.97	1000.7	3812.28	2007.06	1074.85	1053.28	2558.95	662.714	1711.67	2985.05	0.42:0.34:0.30:0.39:0.41:0.65:0.78:0.75:2.87:1.51:0.81:0.79:1.93:0.50:1.29:2.25	530.397	859.477	2225.36	1979.6	0.38:0.61:1.59:1.42	72380	Sec1 family domain-containing protein 1 OS=Homo sapiens OX=9606 GN=SCFD1 PE=1 SV=4
650	TRUE	P38398|BRCA1_HUMAN	22.37	4.72	5	5	Oxidation (M)	129.945	171.225	378.45	219.998	198.521	212.748	216.776	220.531	1646.87	1877.85	418.104	319.526	1189.65	360.843	932.725	778.793	0.22:0.30:0.65:0.38:0.34:0.37:0.37:0.38:2.84:3.24:0.72:0.55:2.05:0.62:1.61:1.34	343.531	212.144	1161.48	850.054	0.54:0.33:1.81:1.32	207721	Breast cancer type 1 susceptibility protein OS=Homo sapiens OX=9606 GN=BRCA1 PE=1 SV=2
756	TRUE	Q9H0H5|RGAP1_HUMAN	18.46	13.45	5	5	Oxidation (M)	368.272	403.891	656.985	725.786	496.172	493.709	647.445	608.541	4423.77	5771.33	552.761	558.827	3765.01	1073.3	4299.12	5954.98	0.19:0.21:0.34:0.38:0.26:0.26:0.34:0.32:2.30:3.00:0.29:0.29:1.96:0.56:2.23:3.09	614.294	666.255	3939.51	3844.62	0.27:0.29:1.74:1.70	71027	Rac GTPase-activating protein 1 OS=Homo sapiens OX=9606 GN=RACGAP1 PE=1 SV=1
911	TRUE	Q9C037|TRIM4_HUMAN	66.98	6.4	3	3	Oxidation (M)	0	0	0	0	0	0	0	0	655.737	635.163	50.4678	83.8881	321.067	52.0409	246.016	315.638	0.00:0.00:0.00:0.00:0.00:0.00:0.00:0.00:4.45:4.31:0.34:0.57:2.18:0.35:1.67:2.14	0	0	525.199	277.328	0.00:0.00:2.62:1.38	57461	E3 ubiquitin-protein ligase TRIM4 OS=Homo sapiens OX=9606 GN=TRIM4 PE=1 SV=2
759	TRUE	Q9NUP9|LIN7C_HUMAN	30.29	36.55	6	6	Acetylation (N-term); Carbamidomethylation; Oxidation (M)	518.394	620.026	956.363	1028.73	1651.08	2301.19	1129.99	1488.35	2529.74	4254.64	1142.69	1740.88	3590.55	2282.16	4943.62	6482.22	0.23:0.27:0.42:0.45:0.72:1.00:0.49:0.65:1.10:1.86:0.50:0.76:1.57:1.00:2.16:2.83	780.878	1642.65	2416.99	4324.64	0.34:0.72:1.05:1.89	21834	Protein lin-7 homolog C OS=Homo sapiens OX=9606 GN=LIN7C PE=1 SV=1
278	TRUE	O75534|CSDE1_HUMAN	29.28	22.31	13	13	Carbamidomethylation; Oxidation (M)	283.932	350.871	673.684	485.594	286.953	274.338	721.625	717.717	10895.8	10360.7	1070.39	984.642	5149.84	2639.33	4177.13	5390.78	0.10:0.13:0.24:0.17:0.10:0.10:0.26:0.26:3.92:3.73:0.39:0.35:1.85:0.95:1.50:1.94	468.942	549.89	5827.9	4339.27	0.17:0.20:2.08:1.55	88885	Cold shock domain-containing protein E1 OS=Homo sapiens OX=9606 GN=CSDE1 PE=1 SV=2
281	TRUE	P17655|CAN2_HUMAN	26.6	25.86	11	11	Oxidation (M)	608.7	538.302	1079.74	1083.67	1657.79	1924.18	1216.38	1232.12	10673.2	9424.53	1956.05	1766.73	10636.3	4283.92	3457.06	4014.44	0.18:0.16:0.31:0.31:0.48:0.55:0.35:0.35:3.07:2.71:0.56:0.51:3.06:1.23:1.00:1.16	845.212	1507.62	5955.14	5597.93	0.24:0.43:1.71:1.61	79995	Calpain-2 catalytic subunit OS=Homo sapiens OX=9606 GN=CAPN2 PE=1 SV=6
271	TRUE	P50748|KNTC1_HUMAN	28.59	7.79	12	12	Oxidation (M)	96.6229	89.0072	0	60.937	76.7961	0	171.904	98.5795	2331.01	2565.05	327.622	382.435	3107.66	1058.51	778.22	630.032	0.13:0.12:0.00:0.08:0.10:0.00:0.23:0.13:3.17:3.49:0.45:0.52:4.22:1.44:1.06:0.86	82.189	115.76	1932.87	1415.92	0.09:0.13:2.18:1.60	250749	Kinetochore-associated protein 1 OS=Homo sapiens OX=9606 GN=KNTC1 PE=1 SV=1
24	TRUE	Q9UPN3|MACF1_HUMAN	14.53	11.17	64	61	Oxidation (M)	587.899	312.276	1091.9	1931.68	674.507	798.866	3216.34	2158.7	2514.06	2061.14	4285.22	3367.02	2312.16	2391.96	1635.4	2977.73	0.29:0.15:0.54:0.96:0.33:0.40:1.59:1.07:1.24:1.02:2.12:1.67:1.14:1.18:0.81:1.47	1105.58	1760.41	3056.86	2329.31	0.54:0.85:1.48:1.13	838308	Microtubule-actin cross-linking factor 1, isoforms 1/2/3/5 OS=Homo sapiens OX=9606 GN=MACF1 PE=1 SV=4
211	TRUE	Q6P179|ERAP2_HUMAN	53.46	23.65	19	19	Oxidation (M)	719.004	726.507	1075.18	1190.42	970.217	893.336	1156.92	1126.32	1447.4	1606.66	2573.99	2254.18	5171.93	3056.16	5990.51	7643.07	0.31:0.31:0.46:0.51:0.41:0.38:0.49:0.48:0.62:0.68:1.10:0.96:2.20:1.30:2.55:3.25	927.777	1036.7	1970.56	5465.42	0.39:0.44:0.84:2.33	110462	Endoplasmic reticulum aminopeptidase 2 OS=Homo sapiens OX=9606 GN=ERAP2 PE=1 SV=2
352	TRUE	P09543|CN37_HUMAN	21.2	30.88	13	13	Oxidation (M)	854.489	902.441	1223.29	1169.97	3096.25	4453.56	2599.55	2774.58	11218.9	9995.47	1067.96	1681.88	10027.6	4095.97	8440.18	10395.1	0.18:0.20:0.26:0.25:0.67:0.96:0.56:0.60:2.43:2.16:0.23:0.36:2.17:0.89:1.82:2.25	1037.55	3230.98	5991.06	8239.7	0.22:0.70:1.30:1.78	47579	2',3'-cyclic-nucleotide 3'-phosphodiesterase OS=Homo sapiens OX=9606 GN=CNP PE=1 SV=2
881	TRUE	O95810|CAVN2_HUMAN	57.74	7.29	2	2	Oxidation (M)	0	60.158	100.42	202.326	135.839	299.066	121.001	123.881	1462.14	1551.67	820.78	829.908	4426.81	1856.29	4989.58	6822.62	0.00:0.04:0.07:0.14:0.09:0.20:0.08:0.08:0.98:1.04:0.55:0.56:2.98:1.25:3.35:4.59	178.237	283.991	1166.12	4523.83	0.12:0.18:0.76:2.94	47173	Caveolae-associated protein 2 OS=Homo sapiens OX=9606 GN=CAVIN2 PE=1 SV=3
1084	TRUE	Q96KC8|DNJC1_HUMAN	15.19	6.68	3	3		60.91	0	75.2098	0	68.3594	70.123	52.7703	58.2144	2081.26	1954.1	59.4766	65.5508	1141.75	350.258	999.499	1881.04	0.11:0.00:0.13:0.00:0.12:0.13:0.09:0.10:3.73:3.51:0.11:0.12:2.05:0.63:1.79:3.37	68.0599	62.3668	1481.84	1093.14	0.10:0.09:2.19:1.62	63883	DnaJ homolog subfamily C member 1 OS=Homo sapiens OX=9606 GN=DNAJC1 PE=1 SV=1
799	TRUE	P28482|MK01_HUMAN	32.24	11.67	3	3	Acetylation (N-term); Oxidation (M)	212.119	189.006	214.553	141.95	196.321	72.7288	395.775	334.027	4663.92	4408	709.027	634.106	1602.17	907.609	2030.77	2020.29	0.18:0.16:0.18:0.12:0.17:0.06:0.34:0.29:3.98:3.77:0.61:0.54:1.37:0.78:1.73:1.73	254.45	288.59	2884.57	1725.67	0.20:0.22:2.24:1.34	41390	Mitogen-activated protein kinase 1 OS=Homo sapiens OX=9606 GN=MAPK1 PE=1 SV=3
621	TRUE	Q9BR76|COR1B_HUMAN	41.75	19.63	7	7	Carbamidomethylation; Oxidation (M)	272.459	277.342	269.067	375.904	411.438	295.835	470.669	508.429	1737.64	2605.28	663.945	1221.19	5384.02	1995.73	1568.5	1539.37	0.22:0.23:0.22:0.31:0.34:0.24:0.38:0.42:1.42:2.13:0.54:1.00:4.40:1.63:1.28:1.26	334.404	444.108	1557.01	2621.9	0.27:0.36:1.26:2.12	54235	Coronin-1B OS=Homo sapiens OX=9606 GN=CORO1B PE=1 SV=1
17	TRUE	Q9NZM1|MYOF_HUMAN	15.7	46.97	81	81	Carbamidomethylation; Oxidation (M)	3493.69	3311.7	12142.3	13812.7	6823.35	9494.48	4303.99	3387.65	48049.3	48710.7	8796.77	8799.75	27918.2	11454	25987.9	30876.3	0.21:0.20:0.73:0.83:0.41:0.57:0.26:0.20:2.88:2.92:0.53:0.53:1.67:0.69:1.56:1.85	8190.1	6002.36	28589.1	24059.1	0.49:0.36:1.71:1.44	234709	Myoferlin OS=Homo sapiens OX=9606 GN=MYOF PE=1 SV=1
938	TRUE	Q9BRK5|CAB45_HUMAN	22.48	10.77	3	3		0	0	0	190.916	0	55.0457	68.0222	66.3318	569.268	1174.24	402.281	50.7567	411.553	884.862	289.507	164.872	0.00:0.00:0.00:0.71:0.00:0.20:0.25:0.25:2.10:4.34:1.49:0.19:1.52:3.27:1.07:0.61	190.916	122.223	783.007	465.697	0.49:0.31:2.01:1.19	41807	45 kDa calcium-binding protein OS=Homo sapiens OX=9606 GN=SDF4 PE=1 SV=1
714	TRUE	P50443|S26A2_HUMAN	23.73	10.15	5	5	Oxidation (M)	177.221	212.007	330.682	257.006	249.43	381.122	273.069	252.854	1865.36	1377.56	331.843	480.792	781.106	624.474	911.671	615.395	0.31:0.37:0.58:0.45:0.44:0.67:0.48:0.44:3.27:2.42:0.58:0.84:1.37:1.10:1.60:1.08	262.57	306.274	1561.55	733.161	0.37:0.43:2.18:1.02	81662	Sulfate transporter OS=Homo sapiens OX=9606 GN=SLC26A2 PE=1 SV=2
932	TRUE	O75689|ADAP1_HUMAN	58.11	9.36	4	3		90.0571	80.6547	82.0839	101.616	182.583	109.494	168.465	149.214	622.785	700.011	382.445	445.915	1394.56	529.721	2326.68	2256.35	0.15:0.13:0.14:0.17:0.30:0.18:0.28:0.25:1.04:1.16:0.64:0.74:2.32:0.88:3.87:3.75	88.603	152.439	580.515	1665.57	0.14:0.25:0.93:2.68	43395	Arf-GAP with dual PH domain-containing protein 1 OS=Homo sapiens OX=9606 GN=ADAP1 PE=1 SV=2
539	TRUE	P20073|ANXA7_HUMAN	54.16	19.67	9	9	Carbamidomethylation; Oxidation (M)	2538.7	2425.88	1124.39	1342.03	2076.29	2925.49	3367.57	3026.14	6347.44	7048.39	4328.14	4660.5	14698.7	9553.56	22382	23521.8	0.36:0.35:0.16:0.19:0.30:0.42:0.48:0.43:0.91:1.01:0.62:0.67:2.11:1.37:3.22:3.38	1857.75	2848.87	5596.12	17539	0.27:0.41:0.80:2.52	52739	Annexin A7 OS=Homo sapiens OX=9606 GN=ANXA7 PE=1 SV=3
175	TRUE	P52789|HXK2_HUMAN	16.21	23.88	17	17	Acetylation (N-term); Oxidation (M)	1676.55	1607.21	2279.04	295.252	2151.61	2231.05	596.774	2554.91	10471.2	10797.7	1746.14	1911.27	15461.3	4865.85	5669.87	7305.34	0.37:0.36:0.51:0.07:0.48:0.50:0.13:0.57:2.34:2.41:0.39:0.43:3.45:1.09:1.27:1.63	1519.74	1942.63	6231.57	8325.58	0.34:0.43:1.38:1.85	102380	Hexokinase-2 OS=Homo sapiens OX=9606 GN=HK2 PE=1 SV=2
1009	TRUE	Q6PFW1|VIP1_HUMAN	110.42	1.74	2	2		0	0	0	0	0	0	0	0	1208.51	1176.16	0	0	569.404	236.969	540.397	749.534	0.00:0.00:0.00:0.00:0.00:0.00:0.00:0.00:4.32:4.20:0.00:0.00:2.03:0.85:1.93:2.68	0	0	1192.33	558.889	0.00:0.00:2.72:1.28	159521	Inositol hexakisphosphate and diphosphoinositol-pentakisphosphate kinase 1 OS=Homo sapiens OX=9606 GN=PPIP5K1 PE=1 SV=1
918	TRUE	P05187|PPB1_HUMAN	38.86	7.66	3	3		0	0	50.8312	50.752	89.9508	0	0	51.5734	265.286	227.956	159.665	176.835	552.863	364.156	1223.3	791.08	0.00:0.00:0.20:0.20:0.36:0.00:0.00:0.21:1.06:0.91:0.64:0.71:2.21:1.46:4.89:3.16	50.7916	70.7621	269.913	732.851	0.18:0.25:0.96:2.61	57954	Alkaline phosphatase, placental type OS=Homo sapiens OX=9606 GN=ALPP PE=1 SV=2
504	TRUE	Q5VZK9|CARL1_HUMAN	46.56	6.93	6	6		0	0	0	0	55.2757	0	0	0	452.113	1188.04	0	0	759.399	422.239	439.139	445.16	0.00:0.00:0.00:0.00:0.24:0.00:0.00:0.00:1.92:5.05:0.00:0.00:3.23:1.80:1.87:1.89	0	55.2757	820.075	602.049	0.00:0.15:2.22:1.63	151557	F-actin-uncapping protein LRRC16A OS=Homo sapiens OX=9606 GN=CARMIL1 PE=1 SV=1
234	TRUE	Q9UQB8|BAIP2_HUMAN	23.84	37.32	16	16	Carbamidomethylation; Oxidation (M)	670.394	627.162	7608.82	1002.91	1782.48	5635.19	1426.81	1453.02	8415.69	7245.65	2533.98	2184.83	16663	10784.5	21145.3	14794.1	0.10:0.10:1.17:0.15:0.27:0.87:0.22:0.22:1.30:1.11:0.39:0.34:2.56:1.66:3.25:2.28	2477.32	2574.38	5095.04	15846.7	0.38:0.40:0.78:2.44	60868	Brain-specific angiogenesis inhibitor 1-associated protein 2 OS=Homo sapiens OX=9606 GN=BAIAP2 PE=1 SV=1
523	TRUE	Q9UGI8|TES_HUMAN	33.02	22.09	8	8	Carbamidomethylation; Oxidation (M)	118.396	173.297	285.855	261.555	283.272	292.853	395.015	358.049	6271.41	4255.34	6157.46	639.433	4165.5	1716.95	1092.14	548.462	0.07:0.10:0.17:0.15:0.17:0.17:0.23:0.21:3.71:2.52:3.65:0.38:2.47:1.02:0.65:0.32	276.36	332.297	4578.47	1880.76	0.16:0.19:2.59:1.06	47996	Testin OS=Homo sapiens OX=9606 GN=TES PE=1 SV=1
49	TRUE	P17301|ITA2_HUMAN	25.52	39.54	42	42	Acetylation (N-term); Carbamidomethylation; Oxidation (M)	12433.9	24564.1	42284.7	40577.7	36656	42981.4	11534.3	15988.3	217199	259323	67418.1	70992.3	118491	85325.3	66267.1	63574.8	0.17:0.33:0.58:0.55:0.50:0.58:0.16:0.22:2.96:3.53:0.92:0.97:1.61:1.16:0.90:0.87	29965.1	26790	153733	83414.5	0.41:0.36:2.09:1.14	129295	Integrin alpha-2 OS=Homo sapiens OX=9606 GN=ITGA2 PE=1 SV=1
942	TRUE	Q8NAN2|MIGA1_HUMAN	16.56	8.54	3	3		57.1759	0	0	60.7652	0	53.9429	0	66.1788	3074.5	3013.26	145.956	200.034	1290.27	481.848	1377.05	1504.97	0.08:0.00:0.00:0.09:0.00:0.08:0.00:0.09:4.34:4.26:0.21:0.28:1.82:0.68:1.95:2.13	58.9705	120.122	2367.18	1163.53	0.06:0.13:2.55:1.25	71006	Mitoguardin 1 OS=Homo sapiens OX=9606 GN=MIGA1 PE=1 SV=1
916	TRUE	Q9HCL2|GPAT1_HUMAN	14.95	4.71	3	3	Carbamidomethylation	16042	20087.3	9183.56	10617.5	19316.9	16070.9	7974.3	8456.44	6273.09	4319.2	6780.01	6231.89	10443.4	13468.7	6221.03	5461.36	1.54:1.93:0.88:1.02:1.85:1.54:0.76:0.81:0.60:0.41:0.65:0.60:1.00:1.29:0.60:0.52	13982.6	13090.9	5901.05	8898.62	1.34:1.25:0.56:0.85	93795	Glycerol-3-phosphate acyltransferase 1, mitochondrial OS=Homo sapiens OX=9606 GN=GPAM PE=1 SV=3
403	TRUE	Q9UI12|VATH_HUMAN	27.27	27.95	9	9	Oxidation (M)	162.625	157.331	516.699	512.498	379.807	425.735	584.25	551.671	6199.82	4728.39	1112.45	956.499	2396.59	734.172	2521.92	2717.55	0.11:0.10:0.34:0.33:0.25:0.28:0.38:0.36:4.02:3.07:0.72:0.62:1.56:0.48:1.64:1.76	385.164	503.087	3249.29	2092.56	0.25:0.32:2.09:1.34	55883	V-type proton ATPase subunit H OS=Homo sapiens OX=9606 GN=ATP6V1H PE=1 SV=1
296	TRUE	P32004|L1CAM_HUMAN	60.15	11.61	12	12	Oxidation (M)	249.162	141.79	434.044	487.486	333.589	393.885	264.326	293.546	11575.6	11961.2	3471.31	3569.79	3459	2412.62	2340.73	2441.4	0.09:0.05:0.16:0.18:0.12:0.14:0.10:0.11:4.23:4.37:1.27:1.30:1.26:0.88:0.85:0.89	448.188	321.336	7749.35	2741.23	0.16:0.11:2.75:0.97	140003	Neural cell adhesion molecule L1 OS=Homo sapiens OX=9606 GN=L1CAM PE=1 SV=2
838	TRUE	P25054|APC_HUMAN	51.05	1.13	2	2		0	0	0	0	0	0	55.8193	0	1387.16	1480.55	220.751	201.668	851.792	156.43	309.101	508.92	0.00:0.00:0.00:0.00:0.00:0.00:0.17:0.00:4.29:4.58:0.68:0.62:2.63:0.48:0.96:1.57	0	55.8193	954.46	486.084	0.00:0.15:2.55:1.30	311646	Adenomatous polyposis coli protein OS=Homo sapiens OX=9606 GN=APC PE=1 SV=2
518	TRUE	P35237|SPB6_HUMAN	20.57	29.79	8	8	Oxidation (M)	469.837	466.779	497.455	387.853	761.282	640.354	569.527	660.643	3443.13	3825.74	803.575	532.922	3959.18	1482.47	1808.8	1451.59	0.35:0.34:0.37:0.29:0.56:0.47:0.42:0.49:2.53:2.81:0.59:0.39:2.91:1.09:1.33:1.07	499.08	657.951	2479.61	2175.51	0.34:0.45:1.71:1.50	42622	Serpin B6 OS=Homo sapiens OX=9606 GN=SERPINB6 PE=1 SV=3
432	TRUE	Q969P0|IGSF8_HUMAN	11.28	23.16	10	10	Oxidation (M)	5516.69	6799.34	9753.85	13595.1	9676.11	15941.7	5066.71	6542.87	5615.1	5446.2	2842.68	3043.13	8549.03	3226.51	1567.92	4900.6	0.82:1.01:1.44:2.01:1.43:2.36:0.75:0.97:0.83:0.81:0.42:0.45:1.27:0.48:0.23:0.73	8916.25	9306.84	4236.78	4561.01	1.32:1.38:0.63:0.68	65034	Immunoglobulin superfamily member 8 OS=Homo sapiens OX=9606 GN=IGSF8 PE=1 SV=1
176	TRUE	O94832|MYO1D_HUMAN	18.21	25.45	21	20	Oxidation (M)	463.404	449.785	1080.56	1021.95	1610.29	781.039	982.837	1393.02	9578.97	9419.09	982.29	898.68	5778.67	3051.61	4751.61	4427	0.16:0.15:0.37:0.35:0.55:0.27:0.34:0.48:3.28:3.23:0.34:0.31:1.98:1.05:1.63:1.52	753.923	1191.8	5219.76	4502.22	0.26:0.41:1.79:1.54	116202	Unconventional myosin-Id OS=Homo sapiens OX=9606 GN=MYO1D PE=1 SV=2
183	TRUE	Q9H4L5|OSBL3_HUMAN	56.63	27.62	18	18	Carbamidomethylation; Oxidation (M)	199.541	207.112	284.572	325.645	272.587	296.671	373.564	345.664	12389.2	7995	2027.82	2237.69	3397.26	3350.17	2130.5	3184.81	0.08:0.08:0.12:0.13:0.11:0.12:0.15:0.14:5.08:3.28:0.83:0.92:1.39:1.37:0.87:1.31	254.218	322.122	6162.44	3015.69	0.10:0.13:2.53:1.24	101224	Oxysterol-binding protein-related protein 3 OS=Homo sapiens OX=9606 GN=OSBPL3 PE=1 SV=1
579	TRUE	Q9UHX3|AGRE2_HUMAN	61.38	8.75	5	5	Carbamidomethylation; Oxidation (M)	1582.83	1519.17	867.207	761.774	865.826	705.14	572.504	590.832	12194	13347	5942.3	7122.63	2481.9	4071.94	2155.69	1907.06	0.45:0.43:0.24:0.22:0.24:0.20:0.16:0.17:3.44:3.77:1.68:2.01:0.70:1.15:0.61:0.54	1182.74	683.576	9651.49	2654.15	0.33:0.19:2.72:0.75	90472	Adhesion G protein-coupled receptor E2 OS=Homo sapiens OX=9606 GN=ADGRE2 PE=1 SV=2
460	TRUE	Q13616|CUL1_HUMAN	25.31	12.11	7	7	Oxidation (M)	132.442	108.142	250.975	249.692	189.841	952.925	358.06	278.909	7302.78	6323.22	322.514	4160.85	2087.36	3965.02	738.847	1516.02	0.07:0.06:0.14:0.14:0.10:0.53:0.20:0.15:4.04:3.50:0.18:2.30:1.15:2.19:0.41:0.84	247.431	469.724	6709.02	2269.34	0.10:0.19:2.77:0.94	89679	Cullin-1 OS=Homo sapiens OX=9606 GN=CUL1 PE=1 SV=2
341	TRUE	Q99623|PHB2_HUMAN	70.12	44.48	12	12	Oxidation (M)	332.739	369.174	602.565	513.875	702.325	720.086	683.251	804.387	58905.6	60652.4	11869.1	11716.1	19395.8	10654.6	12693.1	17609	0.03:0.03:0.05:0.04:0.05:0.06:0.05:0.06:4.53:4.66:0.91:0.90:1.49:0.82:0.98:1.35	454.588	727.512	35974	15088.1	0.03:0.06:2.75:1.16	33296	Prohibitin-2 OS=Homo sapiens OX=9606 GN=PHB2 PE=1 SV=2
832	TRUE	Q9Y5V3|MAGD1_HUMAN	21.04	5.78	3	3		66.1805	283.38	805.394	522.514	119.846	128.033	205.412	172.624	1578.72	2320.28	614.91	568.486	840.665	2418.59	480.15	822.616	0.09:0.38:1.08:0.70:0.16:0.17:0.28:0.23:2.11:3.11:0.82:0.76:1.13:3.24:0.64:1.10	563.348	156.479	1342.84	1167.91	0.70:0.19:1.66:1.45	86161	Melanoma-associated antigen D1 OS=Homo sapiens OX=9606 GN=MAGED1 PE=1 SV=3
713	TRUE	P22681|CBL_HUMAN	76.46	5.74	4	4	Oxidation (M)	73.0203	100.998	93.2968	73.7328	140.891	83.6428	143.538	90.9361	1827.12	3788.35	6162.47	6787.38	1544.22	588.721	1089.92	1332.47	0.05:0.07:0.06:0.05:0.09:0.06:0.10:0.06:1.22:2.53:4.12:4.54:1.03:0.39:0.73:0.89	85.2621	144.831	4641.33	1138.83	0.06:0.10:3.09:0.76	99633	E3 ubiquitin-protein ligase CBL OS=Homo sapiens OX=9606 GN=CBL PE=1 SV=2
451	TRUE	Q07864|DPOE1_HUMAN	44.43	4.55	9	9	Acetylation (N-term); Oxidation (M)	179.412	237.881	163.724	154.644	308.887	162.415	138.636	232.353	1563.33	1468.72	3061.39	580.306	1474.18	5651.69	1144.69	1524.43	0.16:0.21:0.15:0.14:0.27:0.14:0.12:0.21:1.39:1.30:2.71:0.51:1.31:5.01:1.01:1.35	183.915	210.573	1902.25	2448.75	0.16:0.18:1.60:2.06	261518	DNA polymerase epsilon catalytic subunit A OS=Homo sapiens OX=9606 GN=POLE PE=1 SV=5
470	TRUE	Q9H9J2|RM44_HUMAN	36.8	28.31	8	8	Carbamidomethylation; Oxidation (M)	226.107	173.967	89.5949	59.8085	230.474	53.1334	253.633	267.062	5042.1	5185.22	800.906	769.208	1984.35	1183.38	1839.05	1251.31	0.19:0.14:0.07:0.05:0.19:0.04:0.21:0.22:4.16:4.27:0.66:0.63:1.64:0.98:1.52:1.03	137.369	201.076	3020.39	1564.52	0.11:0.16:2.45:1.27	37535	39S ribosomal protein L44, mitochondrial OS=Homo sapiens OX=9606 GN=MRPL44 PE=1 SV=1
224	TRUE	Q9Y3Z3|SAMH1_HUMAN	59.15	33.71	16	16	Oxidation (M)	427.147	451.152	513.353	448.306	546.201	652.402	815.301	718.705	4558.76	3896.78	1466.7	1021.05	13681.1	5650.14	14044.2	16094.3	0.11:0.11:0.13:0.11:0.13:0.16:0.20:0.18:1.12:0.96:0.36:0.25:3.37:1.39:3.46:3.96	477.893	683.152	2735.82	12367.4	0.12:0.17:0.67:3.04	72200	Deoxynucleoside triphosphate triphosphohydrolase SAMHD1 OS=Homo sapiens OX=9606 GN=SAMHD1 PE=1 SV=2
100	TRUE	Q13835|PKP1_HUMAN	84.12	41.9	26	26	Carbamidomethylation; Oxidation (M)	1040.13	908.525	1208.44	1158.34	2262.81	2134.87	2339.04	2066.38	16633.8	17620.2	4408.18	7497	86928.9	63334	100567	77560	0.04:0.04:0.05:0.05:0.09:0.09:0.10:0.09:0.69:0.73:0.18:0.31:3.59:2.61:4.15:3.20	1078.86	2200.77	11539.8	82097.4	0.04:0.09:0.48:3.39	82861	Plakophilin-1 OS=Homo sapiens OX=9606 GN=PKP1 PE=1 SV=2
189	TRUE	P08237|PFKAM_HUMAN	45.49	23.46	15	15	Oxidation (M)	859.177	844.398	615.773	956.115	1503.23	1038.94	3203.34	2748.96	37155	35032.2	7061.35	7440.79	18445.1	9793.55	7381.99	7435.02	0.10:0.10:0.07:0.11:0.17:0.12:0.36:0.31:4.20:3.96:0.80:0.84:2.09:1.11:0.83:0.84	857.497	2168.17	22002.5	10763.9	0.10:0.24:2.46:1.20	85183	ATP-dependent 6-phosphofructokinase, muscle type OS=Homo sapiens OX=9606 GN=PFKM PE=1 SV=2
553	TRUE	Q9HCM4|E41L5_HUMAN	45.97	9	7	5	Oxidation (M)	261.974	217.322	442.121	424.828	1241.68	859.98	770.212	788.635	1892.75	1916.85	956.025	1072.91	4531.04	1469.72	4921.02	5641.89	0.15:0.13:0.26:0.25:0.72:0.50:0.45:0.46:1.10:1.12:0.56:0.63:2.64:0.86:2.87:3.29	353.356	976.266	1528.04	4235.77	0.20:0.55:0.86:2.39	81856	Band 4.1-like protein 5 OS=Homo sapiens OX=9606 GN=EPB41L5 PE=1 SV=3
130	TRUE	Q12860|CNTN1_HUMAN	32.92	30.45	23	23	Oxidation (M)	581.521	1492.42	3421.94	4196.65	1016.78	1497.8	740.946	621.339	18287.2	28151.5	5223.99	5745.52	9426.82	5921.97	5966.39	9352.96	0.09:0.23:0.54:0.66:0.16:0.24:0.12:0.10:2.88:4.43:0.82:0.90:1.48:0.93:0.94:1.47	2423.13	969.215	14352.1	7667.03	0.38:0.15:2.26:1.21	113320	Contactin-1 OS=Homo sapiens OX=9606 GN=CNTN1 PE=1 SV=1
546	TRUE	Q9NQC3|RTN4_HUMAN	28.46	6.71	7	7	Carbamidomethylation	315.095	199.319	681.235	754.467	303.092	536.757	700.866	504.012	15117	14512.1	1000.06	1607.36	7123.23	2155.09	5499.63	7456.93	0.09:0.05:0.19:0.21:0.08:0.15:0.19:0.14:4.14:3.97:0.27:0.44:1.95:0.59:1.51:2.04	508.769	543.715	8359.08	5558.72	0.14:0.15:2.23:1.49	129931	Reticulon-4 OS=Homo sapiens OX=9606 GN=RTN4 PE=1 SV=2
156	TRUE	Q12965|MYO1E_HUMAN	20.06	20.58	20	19	Carbamidomethylation; Oxidation (M)	1068.23	1039.3	1220.15	1025.98	1120.39	2233.12	1196.25	1008.28	11140.2	8758.17	1415.39	1759.83	6395.55	2846.14	3767.13	5294.65	0.33:0.32:0.38:0.32:0.35:0.70:0.37:0.31:3.48:2.73:0.44:0.55:2.00:0.89:1.18:1.65	1088.41	1389.51	5768.4	4575.86	0.34:0.43:1.80:1.43	127062	Unconventional myosin-Ie OS=Homo sapiens OX=9606 GN=MYO1E PE=1 SV=2
515	TRUE	P23528|COF1_HUMAN	22.2	53.61	9	9	Acetylation (N-term); Carbamidomethylation	1953.97	2721.16	3756.13	4077.41	4545.48	7220.12	15932.3	15534.4	37215.7	40186	6179.22	6137.27	26735.8	16841	17083.9	22717.9	0.14:0.19:0.26:0.29:0.32:0.50:1.11:1.09:2.60:2.81:0.43:0.43:1.87:1.18:1.19:1.59	3127.17	10808.1	22429.6	20844.6	0.22:0.76:1.57:1.46	18502	Cofilin-1 OS=Homo sapiens OX=9606 GN=CFL1 PE=1 SV=3
284	TRUE	Q8TD16|BICD2_HUMAN	25.33	15.05	10	10	Oxidation (M)	212.277	249.492	300.933	296.82	265.254	325.815	651.31	639.3	5048.24	4955.92	552.508	609.46	2944.07	1448.54	2024.06	1564.07	0.15:0.18:0.22:0.22:0.19:0.24:0.47:0.46:3.66:3.59:0.40:0.44:2.13:1.05:1.47:1.13	264.881	491.095	2791.53	1995.19	0.19:0.35:2.01:1.44	93533	Protein bicaudal D homolog 2 OS=Homo sapiens OX=9606 GN=BICD2 PE=1 SV=1
522	TRUE	P00749|UROK_HUMAN	26	20.19	8	8	Oxidation (M)	663.457	766.326	1433.7	2298.09	1277.89	1447.37	6696.15	15039.2	27114.8	28316.2	7847.25	8428.7	13517.4	7947.72	12917.5	6200.95	0.07:0.09:0.16:0.26:0.14:0.16:0.75:1.70:3.06:3.19:0.88:0.95:1.52:0.90:1.46:0.70	1290.39	7758.26	17926.7	10145.9	0.14:0.84:1.93:1.09	48507	Urokinase-type plasminogen activator OS=Homo sapiens OX=9606 GN=PLAU PE=1 SV=2
722	TRUE	O60462|NRP2_HUMAN	25.97	6.87	5	5		1373.67	287.358	511.059	1095.21	556.989	401.265	458.052	301.663	5961.35	6487.86	1662.38	1054.99	3049.72	1447.58	1697.04	2619.43	0.76:0.16:0.28:0.60:0.31:0.22:0.25:0.17:3.29:3.58:0.92:0.58:1.68:0.80:0.94:1.45	816.824	429.492	4213.36	2301.42	0.42:0.22:2.17:1.19	104831	Neuropilin-2 OS=Homo sapiens OX=9606 GN=NRP2 PE=1 SV=3
658	TRUE	Q9H6B4|CLMP_HUMAN	18.06	19.57	4	4	Oxidation (M)	658.79	659.968	704.997	137.92	676.922	667.009	444.138	491.92	4527.17	4306.54	1031.18	1836.14	3387.13	2205.7	776.756	565.409	0.46:0.46:0.49:0.10:0.47:0.46:0.31:0.34:3.14:2.99:0.71:1.27:2.35:1.53:0.54:0.39	636.651	668.032	2982.85	1733.75	0.42:0.44:1.98:1.15	41281	CXADR-like membrane protein OS=Homo sapiens OX=9606 GN=CLMP PE=1 SV=1
228	TRUE	P23471|PTPRZ_HUMAN	18.35	8.42	15	15	Oxidation (M)	2647.89	2926.23	4070.36	3754.27	8086.6	3257.61	3079.12	3150.16	16673.5	8350.24	9007.96	7382.91	3753.31	8265.77	11546.1	24298.2	0.35:0.39:0.54:0.50:1.08:0.43:0.41:0.42:2.22:1.11:1.20:0.98:0.50:1.10:1.54:3.23	3349.69	4393.37	10353.7	11965.9	0.45:0.58:1.38:1.59	254587	Receptor-type tyrosine-protein phosphatase zeta OS=Homo sapiens OX=9606 GN=PTPRZ1 PE=1 SV=4
687	TRUE	Q13671|RIN1_HUMAN	39.68	9.2	5	5		167.343	115.943	163.559	134.806	136.186	184.532	161.434	200.985	4950.87	4588.23	666.162	505.949	1872.46	1296.27	1096.11	1737.19	0.15:0.10:0.15:0.12:0.12:0.16:0.14:0.18:4.41:4.08:0.59:0.45:1.67:1.15:0.98:1.55	183.569	249.389	2677.8	1500.51	0.16:0.22:2.32:1.30	84099	Ras and Rab interactor 1 OS=Homo sapiens OX=9606 GN=RIN1 PE=1 SV=4
86	TRUE	P06733|ENOA_HUMAN	35.11	57.14	23	21	Oxidation (M)	3530.42	3299.92	5996.15	5581.81	8222.88	10816.6	60499.7	54170.9	105011	98968.3	39686.4	37029.2	42921.9	37870.3	36652.7	46344.7	0.09:0.09:0.16:0.15:0.22:0.29:1.62:1.45:2.82:2.65:1.06:0.99:1.15:1.02:0.98:1.24	4602.07	33427.5	70173.7	40947.4	0.12:0.90:1.88:1.10	47169	Alpha-enolase OS=Homo sapiens OX=9606 GN=ENO1 PE=1 SV=2
686	TRUE	P23469|PTPRE_HUMAN	12.97	8.14	5	5		170.74	211.852	390.214	280.514	284.695	342.622	185.354	200.714	1760.07	1668.17	152.49	120.002	1115.54	777.552	1065.44	2303.22	0.25:0.31:0.57:0.41:0.41:0.50:0.27:0.29:2.55:2.42:0.22:0.17:1.62:1.13:1.55:3.34	318.157	272.955	1155.26	1315.44	0.42:0.36:1.51:1.72	80642	Receptor-type tyrosine-protein phosphatase epsilon OS=Homo sapiens OX=9606 GN=PTPRE PE=1 SV=1
760	TRUE	Q8WU76|SCFD2_HUMAN	93.75	10.82	6	6		0	0	0	0	0	0	0	0	2407.89	2271.65	607.723	249.174	532.659	342.094	473.907	861.457	0.00:0.00:0.00:0.00:0.00:0.00:0.00:0.00:4.97:4.69:1.26:0.51:1.10:0.71:0.98:1.78	0	0	1565.87	647.099	0.00:0.00:2.83:1.17	75127	Sec1 family domain-containing protein 2 OS=Homo sapiens OX=9606 GN=SCFD2 PE=1 SV=2
733	TRUE	Q9Y4H2|IRS2_HUMAN	26.17	5.75	5	5		79.8615	87.214	164.523	177.876	100.667	163.275	195.468	183.613	2854.04	2607.95	276.264	242.366	882.6	664.106	1141.25	1321.77	0.11:0.13:0.24:0.26:0.14:0.23:0.28:0.26:4.10:3.74:0.40:0.35:1.27:0.95:1.64:1.90	169.825	194.944	1578.39	1090.42	0.22:0.26:2.08:1.44	137334	Insulin receptor substrate 2 OS=Homo sapiens OX=9606 GN=IRS2 PE=1 SV=2
936	TRUE	O60669|MOT2_HUMAN	21.73	6.69	4	4		1326.67	889.637	3523.84	3682.27	7504.54	9631.45	3222.27	3759.16	9379.79	9546.95	4671.91	4450.16	9934.82	5629.02	12384.3	15155.2	0.20:0.14:0.54:0.56:1.15:1.47:0.49:0.57:1.43:1.46:0.71:0.68:1.52:0.86:1.89:2.32	2355.61	6029.36	7012.2	10775.8	0.36:0.92:1.07:1.65	52200	Monocarboxylate transporter 2 OS=Homo sapiens OX=9606 GN=SLC16A7 PE=1 SV=2
307	TRUE	Q96J02|ITCH_HUMAN	11.95	14.95	12	11		1716.38	710.272	707.096	1144.65	1425.18	1841.7	1077.8	934.963	2970.27	3157.17	933.497	928.685	3128.47	1712.56	2423.56	3428.46	0.97:0.40:0.40:0.65:0.81:1.04:0.61:0.53:1.68:1.79:0.53:0.53:1.77:0.97:1.37:1.94	1069.6	1319.91	1997.4	2673.26	0.61:0.75:1.13:1.51	102803	E3 ubiquitin-protein ligase Itchy homolog OS=Homo sapiens OX=9606 GN=ITCH PE=1 SV=2
558	TRUE	Q9Y5G0|PCDGH_HUMAN	63.52	4.12	5	3	Oxidation (M)	0	0	106.627	70.8624	0	104.745	90.0512	71.6483	221.12	213.007	161.211	180.472	1490.16	749.694	1260.08	1308.07	0.00:0.00:0.28:0.19:0.00:0.28:0.24:0.19:0.59:0.57:0.43:0.48:3.96:1.99:3.34:3.47	88.7445	88.8149	230.979	1279.41	0.21:0.21:0.55:3.03	99875	Protocadherin gamma-B5 OS=Homo sapiens OX=9606 GN=PCDHGB5 PE=2 SV=1
85	TRUE	Q03001|DYST_HUMAN	58.05	5.13	34	31	Carbamidomethylation; Oxidation (M)	207.202	283.882	373.065	276.364	235.373	275.749	215.907	310.81	11182	10328	3459.44	3357.92	1874.99	1039.27	1409.1	4673.01	0.08:0.11:0.15:0.11:0.10:0.11:0.09:0.13:4.53:4.18:1.40:1.36:0.76:0.42:0.57:1.89	340.083	307.142	7081.86	2249.09	0.14:0.12:2.84:0.90	860662	Dystonin OS=Homo sapiens OX=9606 GN=DST PE=1 SV=4
112	TRUE	Q13332|PTPRS_HUMAN	78.77	12.83	27	15	Oxidation (M)	302.626	297.356	278.392	295.317	357.014	280.058	383.012	302.543	1138.83	891.359	1630.11	1424.74	6082.82	2846.19	8002.76	7977.56	0.15:0.15:0.14:0.15:0.18:0.14:0.19:0.15:0.56:0.44:0.80:0.70:3.00:1.40:3.94:3.93	293.423	375.096	1271.26	6227.33	0.14:0.18:0.62:3.05	217041	Receptor-type tyrosine-protein phosphatase S OS=Homo sapiens OX=9606 GN=PTPRS PE=1 SV=3
585	TRUE	Q92673|SORL_HUMAN	20.82	2.03	3	3		103.73	0	0	157.805	95.7655	80.5378	0	0	322.465	6341.04	3432.69	940.09	5512.02	1265.87	1380.57	1350.64	0.08:0.00:0.00:0.12:0.07:0.06:0.00:0.00:0.25:4.84:2.62:0.72:4.20:0.97:1.05:1.03	130.768	88.1516	2810.02	2377.27	0.10:0.07:2.08:1.76	248426	Sortilin-related receptor OS=Homo sapiens OX=9606 GN=SORL1 PE=1 SV=2
634	TRUE	P07947|YES_HUMAN	11.66	15.47	7	5	Oxidation (M)	746.615	862.446	1035.39	953.328	1112.73	1363.69	689.269	899.31	6385.47	5178.8	839.027	550.02	3397.82	1746.66	3563.5	4446.31	0.35:0.41:0.49:0.45:0.53:0.65:0.33:0.43:3.03:2.45:0.40:0.26:1.61:0.83:1.69:2.11	899.445	1016.25	3238.33	3288.57	0.43:0.48:1.53:1.56	60801	Tyrosine-protein kinase Yes OS=Homo sapiens OX=9606 GN=YES1 PE=1 SV=3
225	TRUE	Q8TEW0|PARD3_HUMAN	21.66	13.35	16	16	Oxidation (M)	165.48	122.084	667.397	721.611	282.224	227.021	1401.91	1263.84	4494.7	4210.63	710.711	10877.1	2146.93	8302.89	2003.51	2760.96	0.07:0.05:0.26:0.29:0.11:0.09:0.56:0.50:1.78:1.67:0.28:4.31:0.85:3.29:0.79:1.09	668.015	793.749	5073.3	3803.57	0.26:0.31:1.96:1.47	151423	Partitioning defective 3 homolog OS=Homo sapiens OX=9606 GN=PARD3 PE=1 SV=2
970	TRUE	Q9UBI6|GBG12_HUMAN	42.36	56.94	3	3	Carbamidomethylation; Oxidation (M)	1278.52	1446.99	3054.34	2860.73	8464.12	7968.86	3044.27	2468.49	1060.2	1183.22	868.138	864.04	327.228	315.534	776.014	489.233	0.56:0.63:1.34:1.26:3.71:3.50:1.34:1.08:0.47:0.52:0.38:0.38:0.14:0.14:0.34:0.21	2233.35	5599.46	993.901	606.979	0.95:2.37:0.42:0.26	8006	Guanine nucleotide-binding protein G(I)/G(S)/G(O) subunit gamma-12 OS=Homo sapiens OX=9606 GN=GNG12 PE=1 SV=3
755	TRUE	Q8WUD1|RAB2B_HUMAN	28.8	30.09	5	5	Oxidation (M)	766.802	770.99	1755.46	1828.49	2027.01	1999.38	2316.16	2161.06	3485.59	2167.18	1905.57	1524.18	4722.66	2808.74	5408.16	4978.57	0.30:0.30:0.69:0.72:0.80:0.79:0.91:0.85:1.37:0.85:0.75:0.60:1.86:1.11:2.13:1.96	1280.44	2267.24	2270.63	4479.53	0.50:0.88:0.88:1.74	24214	Ras-related protein Rab-2B OS=Homo sapiens OX=9606 GN=RAB2B PE=1 SV=1
429	TRUE	Q14677|EPN4_HUMAN	12.8	19.04	10	10	Oxidation (M)	1988.37	2229.05	1926.03	1321.41	1934.96	1919.37	916.365	2409.79	5334.33	5304.58	1058.15	1382.7	5656.41	2775.91	5682.96	7029.45	0.65:0.73:0.63:0.43:0.63:0.63:0.30:0.79:1.75:1.74:0.35:0.45:1.85:0.91:1.86:2.30	1866.22	1795.12	3269.94	5286.18	0.61:0.59:1.07:1.73	68259	Clathrin interactor 1 OS=Homo sapiens OX=9606 GN=CLINT1 PE=1 SV=1
691	TRUE	O00400|ACATN_HUMAN	44.69	6.74	3	3		121.802	120.162	125.059	121.44	185.214	123.971	211.589	223.59	4717.32	4478.65	684.999	717.587	886.953	1320.18	1645.88	1357.89	0.11:0.11:0.12:0.11:0.17:0.12:0.20:0.21:4.43:4.20:0.64:0.67:0.83:1.24:1.55:1.27	122.116	232.13	2649.64	1302.73	0.11:0.22:2.46:1.21	60909	Acetyl-coenzyme A transporter 1 OS=Homo sapiens OX=9606 GN=SLC33A1 PE=1 SV=1
562	TRUE	Q96RF0|SNX18_HUMAN	40.45	16.08	8	8	Oxidation (M)	737.32	920.578	928.469	857.566	1015.7	704.376	740.063	634.786	1422.39	1530.51	638.263	866.024	3619.13	2206.56	2782.13	2217.07	0.54:0.68:0.68:0.63:0.74:0.52:0.54:0.47:1.04:1.12:0.47:0.64:2.65:1.62:2.04:1.63	860.983	773.731	1114.3	2706.22	0.63:0.57:0.82:1.98	68894	Sorting nexin-18 OS=Homo sapiens OX=9606 GN=SNX18 PE=1 SV=2
919	TRUE	Q15165|PON2_HUMAN	57.11	15.54	3	3		0	0	0	0	0	0	123.71	88.9716	1472.65	1682.37	0	134.359	806.832	286.939	729.744	454.16	0.00:0.00:0.00:0.00:0.00:0.00:0.34:0.25:4.08:4.66:0.00:0.37:2.23:0.79:2.02:1.26	0	106.341	1160.91	602.022	0.00:0.23:2.48:1.29	39381	Serum paraoxonase/arylesterase 2 OS=Homo sapiens OX=9606 GN=PON2 PE=1 SV=4
235	TRUE	P32926|DSG3_HUMAN	68.15	20.82	15	15	Oxidation (M)	968.42	800.051	1027.34	1034.08	1149.17	814.923	1092.85	797.46	3165.12	2414.6	1287.93	1479.42	12626.1	6760.86	8720.68	12257.1	0.27:0.23:0.29:0.29:0.33:0.23:0.31:0.23:0.90:0.69:0.37:0.42:3.58:1.92:2.47:3.48	957.473	963.601	2086.77	10091.2	0.27:0.27:0.59:2.86	107533	Desmoglein-3 OS=Homo sapiens OX=9606 GN=DSG3 PE=1 SV=2
692	TRUE	Q9BZL6|KPCD2_HUMAN	26.9	8.09	5	5	Carbamidomethylation	158.802	83.5397	162.803	222.928	67.3463	224.127	278.9	311.265	7377.73	7162.98	454.318	366.269	3160.66	1168.96	2771.13	2974.12	0.09:0.05:0.10:0.13:0.04:0.13:0.17:0.18:4.38:4.25:0.27:0.22:1.88:0.69:1.65:1.77	195.078	295.805	3840.32	2518.72	0.11:0.17:2.24:1.47	96722	Serine/threonine-protein kinase D2 OS=Homo sapiens OX=9606 GN=PRKD2 PE=1 SV=3
453	TRUE	P13726|TF_HUMAN	17.67	29.49	9	9	Carbamidomethylation; Oxidation (M)	24915.3	25349.8	46007.4	48048	150022	169448	39402.9	39368.2	329153	327610	70919.6	71918.2	273472	182187	122027	130276	0.19:0.20:0.36:0.37:1.17:1.32:0.31:0.31:2.57:2.56:0.55:0.56:2.13:1.42:0.95:1.02	36080.1	99560.2	199900	176990	0.28:0.78:1.56:1.38	33068	Tissue factor OS=Homo sapiens OX=9606 GN=F3 PE=1 SV=1
367	TRUE	Q14254|FLOT2_HUMAN	16.97	30.61	10	10	Oxidation (M)	2223.92	1882.9	3493.91	3242.37	1557.96	1715.64	2745.94	3127.89	6994.8	18805.2	2318.4	3163.84	11565.3	3309.45	15854.7	17525.8	0.36:0.30:0.56:0.52:0.25:0.28:0.44:0.50:1.12:3.02:0.37:0.51:1.86:0.53:2.55:2.82	2710.77	2286.86	7820.56	12063.8	0.44:0.37:1.26:1.94	47064	Flotillin-2 OS=Homo sapiens OX=9606 GN=FLOT2 PE=1 SV=2
663	TRUE	P10301|RRAS_HUMAN	25.11	27.98	6	5		1385.09	1448.16	1283.83	1053.8	3708.12	3009.29	1694.13	1302.29	14651.8	14630.8	3216.31	2994.83	6950.19	3836.55	6160.43	4374.03	0.31:0.32:0.29:0.24:0.83:0.67:0.38:0.29:3.27:3.26:0.72:0.67:1.55:0.86:1.37:0.98	1292.72	2471.34	8947.1	5554.74	0.28:0.54:1.96:1.22	23480	Ras-related protein R-Ras OS=Homo sapiens OX=9606 GN=RRAS PE=1 SV=1
311	TRUE	Q96KP1|EXOC2_HUMAN	18	13.85	10	10	Oxidation (M)	440.407	1498.9	1031.43	708.15	1079.04	1126.27	2663.71	2659.84	8675.88	8535.94	1693.49	1603.92	4283.06	2099.43	4257.76	4468.23	0.15:0.51:0.35:0.24:0.37:0.38:0.91:0.91:2.96:2.92:0.58:0.55:1.46:0.72:1.45:1.53	919.721	1882.22	5127.31	3777.12	0.31:0.64:1.75:1.29	104066	Exocyst complex component 2 OS=Homo sapiens OX=9606 GN=EXOC2 PE=1 SV=1
1038	TRUE	Q9BUZ4|TRAF4_HUMAN	32.92	8.3	3	3		53.1626	0	0	56.035	64.5477	58.861	57.243	71.5135	1981.49	1531.22	0	0	1190.01	135.248	984.892	922.633	0.12:0.00:0.00:0.13:0.15:0.13:0.13:0.16:4.46:3.45:0.00:0.00:2.68:0.30:2.22:2.08	54.5988	63.0413	1756.36	922.973	0.08:0.09:2.51:1.32	53543	TNF receptor-associated factor 4 OS=Homo sapiens OX=9606 GN=TRAF4 PE=1 SV=1
182	TRUE	Q04912|RON_HUMAN	45.63	19	19	19	Carbamidomethylation; Oxidation (M)	387.194	341.79	512.681	680.119	337.993	443.617	322.812	475.538	17774.9	18411	2686.61	2416.74	5367.23	2685.84	5689.95	5567.87	0.10:0.09:0.13:0.17:0.08:0.11:0.08:0.12:4.44:4.60:0.67:0.60:1.34:0.67:1.42:1.39	505.012	468.21	10322.3	4827.72	0.13:0.12:2.56:1.20	152241	Macrophage-stimulating protein receptor OS=Homo sapiens OX=9606 GN=MST1R PE=1 SV=3
490	TRUE	Q8TEU7|RPGF6_HUMAN	46.29	6.5	7	7	Oxidation (M)	246.085	126.006	63.1957	141.788	136.92	113.37	139.141	162.737	4355.8	1947.36	858.687	951.992	1350.2	1000.83	458.957	884.416	0.30:0.16:0.08:0.18:0.17:0.14:0.17:0.20:5.39:2.41:1.06:1.18:1.67:1.24:0.57:1.09	208.131	138.042	2190.21	960.342	0.24:0.16:2.51:1.10	179423	Rap guanine nucleotide exchange factor 6 OS=Homo sapiens OX=9606 GN=RAPGEF6 PE=1 SV=2
793	TRUE	Q15599|NHRF2_HUMAN	16.62	17.51	4	4		186.102	211.912	299.934	217.351	276.05	400.643	374.644	449.557	3568.06	3599.09	152.208	1116.64	1295.2	1677.39	733.063	1146.11	0.19:0.22:0.31:0.22:0.28:0.41:0.38:0.46:3.64:3.67:0.16:1.14:1.32:1.71:0.75:1.17	228.825	375.224	2391.29	1261.85	0.22:0.35:2.25:1.19	37414	Na(+)/H(+) exchange regulatory cofactor NHE-RF2 OS=Homo sapiens OX=9606 GN=SLC9A3R2 PE=1 SV=2
821	TRUE	Q9UKE5|TNIK_HUMAN	34.07	4.34	5	5		1395.78	1324.96	1550.3	625.032	3920.27	2672.98	1074.19	1165.69	4429.29	3577.45	1413.13	1619.2	11041.1	6103.61	11328.1	11754.3	0.34:0.33:0.38:0.15:0.97:0.66:0.26:0.29:1.09:0.88:0.35:0.40:2.72:1.50:2.79:2.89	1224.02	2208.28	2759.77	10056.8	0.30:0.54:0.68:2.48	154943	TRAF2 and NCK-interacting protein kinase OS=Homo sapiens OX=9606 GN=TNIK PE=1 SV=1
186	TRUE	O00429|DNM1L_HUMAN	27.02	33.02	16	16	Oxidation (M)	431.308	478.161	671.428	658.638	275.038	406.612	704.599	694.94	6032.91	5910.65	1263.34	1112.07	2175.07	1173.42	1561.14	2772.99	0.26:0.29:0.41:0.40:0.17:0.25:0.43:0.42:3.67:3.59:0.77:0.68:1.32:0.71:0.95:1.69	614.498	520.298	3579.74	1920.66	0.37:0.31:2.16:1.16	81877	Dynamin-1-like protein OS=Homo sapiens OX=9606 GN=DNM1L PE=1 SV=2
568	TRUE	P31431|SDC4_HUMAN	60.44	30.81	6	6	Oxidation (M)	2259.5	2280.88	2237.57	2180.12	2759	2079.91	1804.87	1829.23	7767.87	9909.44	3783.57	4369.31	30369.2	12847.2	33363	41700.2	0.22:0.23:0.22:0.22:0.27:0.21:0.18:0.18:0.77:0.98:0.37:0.43:3.01:1.27:3.30:4.13	2239.52	2169.32	6824.44	30748.7	0.21:0.21:0.65:2.93	21642	Syndecan-4 OS=Homo sapiens OX=9606 GN=SDC4 PE=1 SV=2
630	TRUE	O75116|ROCK2_HUMAN	93.94	3.24	4	3	Oxidation (M)	0	0	0	0	0	0	0	0	96.8725	241.515	0	0	282.052	0	184.96	172.676	0.00:0.00:0.00:0.00:0.00:0.00:0.00:0.00:1.58:3.95:0.00:0.00:4.61:0.00:3.03:2.82	0	0	227.869	255.296	0.00:0.00:1.89:2.11	160900	Rho-associated protein kinase 2 OS=Homo sapiens OX=9606 GN=ROCK2 PE=1 SV=4
616	TRUE	Q15654|TRIP6_HUMAN	32.46	25.42	7	7		144.733	150.037	301.017	390.369	176.374	310.011	521.671	523.971	10991.1	10957.9	1444.99	803.151	7237.5	2016.62	2594.63	2748.16	0.06:0.06:0.12:0.15:0.07:0.12:0.20:0.20:4.26:4.24:0.56:0.31:2.80:0.78:1.00:1.06	301.861	453.986	6049.28	3649.23	0.12:0.17:2.31:1.40	50288	Thyroid receptor-interacting protein 6 OS=Homo sapiens OX=9606 GN=TRIP6 PE=1 SV=3
715	TRUE	Q12923|PTN13_HUMAN	51.29	2.58	5	5		112.467	101.52	83.2777	89.3397	100.803	119.503	109.371	114.48	2094.92	1692.07	899.562	387.036	587.649	373.109	290.848	366.636	0.24:0.22:0.18:0.19:0.21:0.25:0.23:0.24:4.46:3.60:1.91:0.82:1.25:0.79:0.62:0.78	96.6511	111.04	1546.49	479.732	0.17:0.20:2.77:0.86	276906	Tyrosine-protein phosphatase non-receptor type 13 OS=Homo sapiens OX=9606 GN=PTPN13 PE=1 SV=2
92	TRUE	O15020|SPTN2_HUMAN	13.9	13.47	28	21	Oxidation (M)	304.949	1208.76	433.543	442.645	490.66	545.556	1399.45	727.059	4279.03	4404.64	711.92	775.611	2620.21	1074.96	1707.04	2506.87	0.21:0.82:0.29:0.30:0.33:0.37:0.95:0.49:2.90:2.98:0.48:0.53:1.77:0.73:1.16:1.70	631.25	790.682	2542.8	1977.27	0.42:0.53:1.71:1.33	271325	Spectrin beta chain, non-erythrocytic 2 OS=Homo sapiens OX=9606 GN=SPTBN2 PE=1 SV=3
1001	TRUE	P04920|B3A2_HUMAN	74.05	1.93	2	2		0	0	0	0	0	0	0	0	781.172	752.399	82.1315	65.011	194.895	209.668	265.118	117.626	0.00:0.00:0.00:0.00:0.00:0.00:0.00:0.00:5.06:4.88:0.53:0.42:1.26:1.36:1.72:0.76	0	0	507.971	242.163	0.00:0.00:2.71:1.29	137009	Anion exchange protein 2 OS=Homo sapiens OX=9606 GN=SLC4A2 PE=1 SV=4
950	TRUE	Q9Y2J4|AMOL2_HUMAN	89.68	3.34	2	2		0	0	0	0	0	0	0	0	126.152	145.804	0	0	284.742	103.166	174.818	464.244	0.00:0.00:0.00:0.00:0.00:0.00:0.00:0.00:1.55:1.80:0.00:0.00:3.51:1.27:2.15:5.72	0	0	135.978	372.997	0.00:0.00:1.07:2.93	85764	Angiomotin-like protein 2 OS=Homo sapiens OX=9606 GN=AMOTL2 PE=1 SV=3
421	TRUE	Q9UKA4|AKA11_HUMAN	65.42	4.89	7	7	Oxidation (M)	0	0	0	0	56.4497	69.4775	0	52.8567	2664.31	2446.82	218.818	220.894	1001.85	392.847	810.258	637.742	0.00:0.00:0.00:0.00:0.11:0.13:0.00:0.10:4.97:4.57:0.41:0.41:1.87:0.73:1.51:1.19	0	59.5946	1387.71	710.674	0.00:0.11:2.57:1.32	210512	A-kinase anchor protein 11 OS=Homo sapiens OX=9606 GN=AKAP11 PE=1 SV=1
363	TRUE	Q9BTX1|NDC1_HUMAN	40.43	17.06	9	9	Oxidation (M)	393.555	215.231	385.228	430.765	289.409	352.341	607.747	674.486	9492.76	10092.2	1614.94	1744.15	2971.72	2270.13	2411.98	2488.48	0.17:0.09:0.17:0.19:0.13:0.15:0.27:0.30:4.17:4.43:0.71:0.77:1.30:1.00:1.06:1.09	376.434	587.063	5736.01	2535.58	0.16:0.25:2.48:1.10	76305	Nucleoporin NDC1 OS=Homo sapiens OX=9606 GN=NDC1 PE=1 SV=2
677	TRUE	Q14141|SEPT6_HUMAN	13.35	14.29	6	5	Oxidation (M)	409.6	728.836	814.79	702.096	669.431	812.289	713.125	649.787	5926.33	5559.96	568.193	580.593	3947.32	1602.61	2104.13	2823.44	0.23:0.41:0.46:0.39:0.37:0.45:0.40:0.36:3.31:3.11:0.32:0.32:2.21:0.90:1.18:1.58	663.83	711.158	3158.77	2619.38	0.37:0.40:1.77:1.46	49717	Septin-6 OS=Homo sapiens OX=9606 GN=SEPTIN6 PE=1 SV=4
698	TRUE	P29992|GNA11_HUMAN	14.16	11.14	5	3		315.192	126.76	418.694	309.285	760.065	1234.67	222.059	243.257	1444.84	1535.73	463.206	398.321	916.673	731.434	1385.96	2189.23	0.40:0.16:0.53:0.39:0.96:1.56:0.28:0.31:1.82:1.94:0.58:0.50:1.16:0.92:1.75:2.76	409.267	695.82	1040.92	1393.52	0.46:0.79:1.18:1.57	42123	Guanine nucleotide-binding protein subunit alpha-11 OS=Homo sapiens OX=9606 GN=GNA11 PE=1 SV=2
458	TRUE	Q8NFF5|FAD1_HUMAN	18.17	17.38	7	7	Oxidation (M)	270.594	292.788	362.825	365.379	315.712	374.924	318.753	282.107	4013.31	4217.01	337.317	395.661	1601.14	929.591	2172.53	1506.75	0.24:0.26:0.33:0.33:0.28:0.34:0.29:0.25:3.62:3.80:0.30:0.36:1.44:0.84:1.96:1.36	322.896	366.595	2240.82	1552.5	0.29:0.33:2.00:1.39	65266	FAD synthase OS=Homo sapiens OX=9606 GN=FLAD1 PE=1 SV=1
738	TRUE	O43159|RRP8_HUMAN	45.38	19.3	6	6		123.381	195.292	323.099	216.713	74.7615	159.154	200.173	249.293	13895.7	14958.6	1796.15	1595.91	2351.03	1847.14	4529.35	6490.94	0.04:0.06:0.11:0.07:0.02:0.05:0.07:0.08:4.54:4.88:0.59:0.52:0.77:0.60:1.48:2.12	315.517	245.367	8061.58	3804.61	0.10:0.08:2.59:1.22	50715	Ribosomal RNA-processing protein 8 OS=Homo sapiens OX=9606 GN=RRP8 PE=1 SV=2
177	TRUE	Q460N5|PAR14_HUMAN	56.13	11.38	14	14	Oxidation (M)	378.398	337.642	174.808	196.41	476.921	510.155	232.163	299.137	638.753	751.277	661.309	587.343	3694.24	1537.8	2905.69	4017.45	0.35:0.31:0.16:0.18:0.44:0.47:0.21:0.28:0.59:0.69:0.61:0.54:3.40:1.41:2.67:3.69	307.36	379.594	659.671	3038.8	0.28:0.35:0.60:2.77	202800	Protein mono-ADP-ribosyltransferase PARP14 OS=Homo sapiens OX=9606 GN=PARP14 PE=1 SV=3
29	TRUE	P23229|ITA6_HUMAN	50.33	46.28	59	59	Acetylation (N-term); Carbamidomethylation; Oxidation (M)	16705.6	16291.3	40631.8	39632.6	90539.5	92594.6	41998.6	39478.9	94207.3	88311.6	42547.5	42976.4	388381	309541	394228	365415	0.13:0.12:0.31:0.30:0.69:0.70:0.32:0.30:0.72:0.67:0.32:0.33:2.95:2.35:3.00:2.78	28315.3	66152.9	67010.7	364391	0.22:0.50:0.51:2.77	126606	Integrin alpha-6 OS=Homo sapiens OX=9606 GN=ITGA6 PE=1 SV=5
285	TRUE	Q8WX93|PALLD_HUMAN	40.91	9.76	11	11	Carbamidomethylation; Oxidation (M)	87.2917	211.154	302.85	166.145	142.925	97.0302	257.884	270.455	4214.96	4953.82	1002.75	976.92	1264.11	772.69	874.434	1327.76	0.08:0.20:0.29:0.16:0.14:0.09:0.24:0.26:3.99:4.68:0.95:0.92:1.20:0.73:0.83:1.26	221.905	213.422	2787.11	1059.75	0.21:0.20:2.60:0.99	150564	Palladin OS=Homo sapiens OX=9606 GN=PALLD PE=1 SV=3
749	TRUE	P15529|MCP_HUMAN	27.78	8.93	6	6	Carbamidomethylation; Oxidation (M)	1739.17	1538.97	3415.51	3065.51	4464.8	4354.78	1740.66	1338.11	56924	54821.1	7497.15	7320.26	35279.3	11547	9992.65	14676.7	0.13:0.11:0.25:0.22:0.33:0.32:0.13:0.10:4.15:3.99:0.55:0.53:2.57:0.84:0.73:1.07	2439.79	2974.59	31640.6	17873.9	0.18:0.22:2.30:1.30	43747	Membrane cofactor protein OS=Homo sapiens OX=9606 GN=CD46 PE=1 SV=3
172	TRUE	P54753|EPHB3_HUMAN	66.49	20.34	21	13	Oxidation (M)	267.76	343.503	629.637	630.737	608.99	1030.26	1346.19	1118.56	1919.88	3095.68	1643.61	1272.56	15064.4	7426.11	14224.5	16784.8	0.06:0.08:0.15:0.15:0.14:0.24:0.32:0.27:0.46:0.73:0.39:0.30:3.58:1.76:3.38:3.98	544.72	1026	1982.93	13374.9	0.13:0.24:0.47:3.16	110330	Ephrin type-B receptor 3 OS=Homo sapiens OX=9606 GN=EPHB3 PE=1 SV=2
872	TRUE	O43865|SAHH2_HUMAN	21.3	8.87	4	4	Carbamidomethylation; Oxidation (M)	438.26	582.112	459.536	453.578	380.485	198.775	382.804	531.656	2305.93	5406.5	817.863	677.21	2348.76	597.727	1820.12	2443.96	0.35:0.47:0.37:0.37:0.31:0.16:0.31:0.43:1.86:4.36:0.66:0.55:1.89:0.48:1.47:1.97	483.371	454.889	2301.88	1802.64	0.38:0.36:1.83:1.43	58951	S-adenosylhomocysteine hydrolase-like protein 1 OS=Homo sapiens OX=9606 GN=AHCYL1 PE=1 SV=2
243	TRUE	Q9UJZ1|STML2_HUMAN	35.66	49.44	13	13	Oxidation (M)	2855.52	1173.18	2307.36	1989.92	4129.72	1890.86	1235.7	2416.33	45536.1	44794.4	8129.96	7940.94	16144.8	9812.45	9068.7	11630.4	0.27:0.11:0.22:0.19:0.39:0.18:0.12:0.23:4.26:4.19:0.76:0.74:1.51:0.92:0.85:1.09	2081.5	2418.15	26600.4	11664.1	0.19:0.23:2.49:1.09	38534	Stomatin-like protein 2, mitochondrial OS=Homo sapiens OX=9606 GN=STOML2 PE=1 SV=1
613	TRUE	Q9UBB4|ATX10_HUMAN	25.57	16.63	6	6	Oxidation (M)	341.875	343.496	579.905	532.454	296.11	407.031	547.222	404.401	3621.03	3692.14	932.966	853.103	1456.17	578.482	1477.11	1087.82	0.32:0.32:0.54:0.50:0.28:0.38:0.51:0.38:3.38:3.44:0.87:0.80:1.36:0.54:1.38:1.01	449.432	413.691	2274.81	1149.9	0.42:0.39:2.12:1.07	53489	Ataxin-10 OS=Homo sapiens OX=9606 GN=ATXN10 PE=1 SV=1
266	TRUE	Q15582|BGH3_HUMAN	18.3	31.63	15	15	Oxidation (M)	1493.05	1741.92	6286.76	7497.93	3134.62	2451.29	2235.2	2026.04	7971.92	7689.65	2003.71	2857.68	12562.2	6529.66	14444.8	15641.6	0.25:0.29:1.04:1.24:0.52:0.41:0.37:0.34:1.32:1.27:0.33:0.47:2.08:1.08:2.39:2.59	4254.91	2461.79	5130.74	12294.6	0.70:0.41:0.85:2.04	74681	Transforming growth factor-beta-induced protein ig-h3 OS=Homo sapiens OX=9606 GN=TGFBI PE=1 SV=1
333	TRUE	Q14BN4|SLMAP_HUMAN	13.67	14.37	10	10		841.648	558.511	846.523	375.671	623.392	974.876	281.516	287.076	3283.61	3189.86	611.7	2014.55	1017.27	6016.73	3289.6	582.372	0.54:0.36:0.55:0.24:0.40:0.63:0.18:0.19:2.12:2.06:0.39:1.30:0.66:3.88:2.12:0.38	655.588	541.715	2274.93	2726.49	0.42:0.35:1.47:1.76	95198	Sarcolemmal membrane-associated protein OS=Homo sapiens OX=9606 GN=SLMAP PE=1 SV=1
446	TRUE	O60443|GSDME_HUMAN	22.68	22.98	10	10	Carbamidomethylation	475.217	725.636	1034.63	1293.83	680.641	1093.4	797.725	719.932	9888.6	9557.08	1475.8	1451.62	4561.92	2617.68	2067.58	3643.11	0.18:0.28:0.39:0.49:0.26:0.42:0.30:0.27:3.76:3.63:0.56:0.55:1.73:1.00:0.79:1.39	882.329	822.923	5593.28	3222.57	0.34:0.31:2.13:1.23	54555	Gasdermin-E OS=Homo sapiens OX=9606 GN=GSDME PE=1 SV=2
355	TRUE	Q96PD2|DCBD2_HUMAN	43.26	18.71	11	11	Oxidation (M)	842.707	877.498	1093.68	1244.96	897.971	771.246	577.608	517.683	28608.8	33483.2	4439.59	4376.04	13224	5032.94	5781.35	7956.66	0.12:0.13:0.16:0.18:0.13:0.11:0.08:0.08:4.17:4.88:0.65:0.64:1.93:0.73:0.84:1.16	1041.29	738.418	17726.9	7998.73	0.15:0.11:2.58:1.16	85035	Discoidin, CUB and LCCL domain-containing protein 2 OS=Homo sapiens OX=9606 GN=DCBLD2 PE=1 SV=1
662	TRUE	Q9Y289|SC5A6_HUMAN	18.14	9.76	5	5	Oxidation (M)	756.565	668.272	1228.91	1191.33	1182.63	1903.33	977.099	712.089	11206.2	12704.5	1290.21	1572.47	6479.36	2197.57	3827.52	5153.65	0.23:0.20:0.37:0.36:0.36:0.57:0.29:0.21:3.38:3.83:0.39:0.47:1.95:0.66:1.15:1.55	995.776	1228.8	6693.34	4414.53	0.30:0.37:2.01:1.32	68642	Sodium-dependent multivitamin transporter OS=Homo sapiens OX=9606 GN=SLC5A6 PE=2 SV=2
242	TRUE	Q4KMQ2|ANO6_HUMAN	9.55	18.57	13	13	Oxidation (M)	1164.17	993.418	2727.45	2996.32	3506.11	3098.28	907.323	2178.15	6146.36	5915.79	1215.09	1919.34	4941.77	3381.49	5570.02	8356.39	0.34:0.29:0.79:0.87:1.02:0.90:0.26:0.63:1.79:1.72:0.35:0.56:1.44:0.98:1.62:2.43	1970.34	2422.47	3799.14	5562.41	0.57:0.70:1.10:1.62	106165	Anoctamin-6 OS=Homo sapiens OX=9606 GN=ANO6 PE=1 SV=2
10	TRUE	P16144|ITB4_HUMAN	55.3	51.26	100	100	Carbamidomethylation; Oxidation (M)	18802.7	18387.4	49952	49568.9	91851.9	107965	51783.5	52800.4	136796	87760.6	62303.7	65857.4	552150	381243	575399	622798	0.10:0.10:0.27:0.27:0.50:0.59:0.28:0.29:0.75:0.48:0.34:0.36:3.02:2.09:3.15:3.41	34177.7	76100.1	88179.4	532898	0.19:0.42:0.48:2.91	202167	Integrin beta-4 OS=Homo sapiens OX=9606 GN=ITGB4 PE=1 SV=5
874	TRUE	P48067|SC6A9_HUMAN	18.16	7.51	4	4		371.56	365.59	504.018	592.782	553.099	900.604	1213.41	1302.74	1694.02	2009.17	618.374	527.781	1585.52	1051.44	1698.45	1416.45	0.36:0.36:0.49:0.58:0.54:0.88:1.18:1.27:1.65:1.96:0.60:0.51:1.55:1.03:1.66:1.38	458.488	992.465	1212.34	1437.97	0.45:0.97:1.18:1.40	78260	Sodium- and chloride-dependent glycine transporter 1 OS=Homo sapiens OX=9606 GN=SLC6A9 PE=1 SV=3
693	TRUE	P09497|CLCB_HUMAN	17.03	20.96	5	5		534.891	349.67	587.108	494.169	362.262	359.533	928.388	518.298	1140.63	1474.41	437.717	614.711	1616.08	635.687	1837.31	2754.97	0.58:0.38:0.64:0.54:0.40:0.39:1.01:0.57:1.25:1.61:0.48:0.67:1.77:0.69:2.01:3.01	517.982	573.338	1084.25	1801.59	0.52:0.58:1.09:1.81	25190	Clathrin light chain B OS=Homo sapiens OX=9606 GN=CLTB PE=1 SV=1
8	TRUE	P13647|K2C5_HUMAN	34.09	53.39	92	72	Acetylation (N-term); Carbamidomethylation; Oxidation (M)	21146.6	12788.5	22714.4	15981.9	28453.3	35758.6	493492	481792	306564	288992	131511	133728	654732	596935	878477	739952	0.07:0.04:0.08:0.05:0.09:0.12:1.63:1.59:1.01:0.95:0.43:0.44:2.16:1.97:2.90:2.44	18157.8	259874	215199	717524	0.06:0.86:0.71:2.37	62378	Keratin, type II cytoskeletal 5 OS=Homo sapiens OX=9606 GN=KRT5 PE=1 SV=3
164	TRUE	P11717|MPRI_HUMAN	38.96	12.24	23	23	Oxidation (M)	980.27	1065.25	1299.64	1587.37	1077.45	1399.88	653.006	657.046	3889.2	3709.95	1065.88	1338.1	9149.13	3925.28	12110.4	13908.9	0.27:0.29:0.36:0.44:0.30:0.39:0.18:0.18:1.08:1.03:0.29:0.37:2.53:1.09:3.35:3.85	1299.45	946.845	2500.78	9773.43	0.36:0.26:0.69:2.69	274375	Cation-independent mannose-6-phosphate receptor OS=Homo sapiens OX=9606 GN=IGF2R PE=1 SV=3
815	TRUE	Q92854|SEM4D_HUMAN	46.52	5.1	3	3		320.354	300.808	245.683	258.22	458.531	1280.19	1255.37	739.071	1733.98	815.004	821.751	963.667	4927.42	1492.5	3840.7	4370.78	0.22:0.20:0.16:0.17:0.31:0.86:0.84:0.50:1.16:0.55:0.55:0.65:3.31:1.00:2.58:2.94	316.958	971.394	1083.6	3657.85	0.21:0.64:0.72:2.43	96150	Semaphorin-4D OS=Homo sapiens OX=9606 GN=SEMA4D PE=1 SV=1
1119	TRUE	Q9Y6W5|WASF2_HUMAN	30.32	6.43	2	2		187.827	196.046	257.171	284.691	650.885	764.986	796.923	575.817	1475.34	945.27	301.532	313.306	1954.44	870.637	1368.73	2063.39	0.23:0.24:0.32:0.35:0.80:0.94:0.98:0.71:1.81:1.16:0.37:0.39:2.40:1.07:1.68:2.54	231.434	697.153	758.863	1564.3	0.28:0.86:0.93:1.92	54284	Wiskott-Aldrich syndrome protein family member 2 OS=Homo sapiens OX=9606 GN=WASF2 PE=1 SV=3
22	TRUE	Q9NYQ8|FAT2_HUMAN	58.62	24.37	75	75	Oxidation (M)	1465.17	1295.9	2279.31	1271.35	1656.3	1648.08	951.31	1027.97	4136.32	5070.55	2366.97	2723.12	16875.5	8275.12	22657.5	24610.1	0.24:0.21:0.37:0.21:0.27:0.27:0.15:0.17:0.67:0.83:0.39:0.44:2.75:1.35:3.69:4.01	1617.28	1320.92	3574.24	18104.6	0.26:0.21:0.58:2.94	479317	Protocadherin Fat 2 OS=Homo sapiens OX=9606 GN=FAT2 PE=1 SV=2
366	TRUE	Q9H8M5|CNNM2_HUMAN	42.11	5.94	9	4	Oxidation (M)	273.989	288.878	504.118	352.126	591.357	673.008	518.887	445.35	603.197	950.592	726.723	724.733	2596.57	890.856	2509.05	3110.68	0.28:0.29:0.51:0.36:0.60:0.68:0.53:0.45:0.61:0.97:0.74:0.74:2.64:0.90:2.55:3.16	400.023	618.815	751.311	2276.79	0.40:0.61:0.74:2.25	96623	Metal transporter CNNM2 OS=Homo sapiens OX=9606 GN=CNNM2 PE=1 SV=2
647	TRUE	Q9ULL4|PLXB3_HUMAN	117.06	2.1	4	3		0	0	0	0	0	0	0	0	59.874	81.0804	0	0	414.025	245.376	445.577	542.72	0.00:0.00:0.00:0.00:0.00:0.00:0.00:0.00:0.54:0.73:0.00:0.00:3.70:2.19:3.99:4.85	0	0	70.4772	411.925	0.00:0.00:0.58:3.42	206847	Plexin-B3 OS=Homo sapiens OX=9606 GN=PLXNB3 PE=1 SV=2
491	TRUE	Q9UKS6|PACN3_HUMAN	22.18	24.29	8	8	Oxidation (M)	2031.35	2557.15	3067.87	3060.49	3518.81	3902.21	1978.92	1609.26	22782	6149.18	3952.62	4201.65	7656.32	8953.45	7345.64	9653.65	0.35:0.44:0.53:0.53:0.61:0.68:0.34:0.28:3.94:1.06:0.68:0.73:1.33:1.55:1.27:1.67	2679.22	2752.3	9271.37	8402.27	0.46:0.48:1.61:1.45	48487	Protein kinase C and casein kinase substrate in neurons protein 3 OS=Homo sapiens OX=9606 GN=PACSIN3 PE=1 SV=2
612	TRUE	P30419|NMT1_HUMAN	9.94	13.71	4	4	Oxidation (M)	0	0	68.5795	74.3453	0	185.016	112.383	118.082	1589.33	1718.79	132.247	143.957	451.594	166.47	649.532	923.145	0.00:0.00:0.17:0.19:0.00:0.47:0.28:0.30:4.02:4.34:0.33:0.36:1.14:0.42:1.64:2.33	71.4624	241.363	1389.48	664.289	0.12:0.41:2.35:1.12	56806	Glycylpeptide N-tetradecanoyltransferase 1 OS=Homo sapiens OX=9606 GN=NMT1 PE=1 SV=2
267	TRUE	P09211|GSTP1_HUMAN	21.31	54.76	11	11	Carbamidomethylation; Oxidation (M)	2535.26	2154.14	2057.69	1803.09	8231.97	10788.7	19529	16655.3	62244.5	61514.6	2470.2	4870	33718.8	29568.9	21798.4	30902.4	0.13:0.11:0.11:0.09:0.42:0.56:1.01:0.86:3.20:3.17:0.13:0.25:1.74:1.52:1.12:1.59	2137.55	13801.3	32774.8	28997.1	0.11:0.71:1.69:1.49	23356	Glutathione S-transferase P OS=Homo sapiens OX=9606 GN=GSTP1 PE=1 SV=2
1202	TRUE	Q96AC1|FERM2_HUMAN	18.61	3.68	2	2	Oxidation (M)	56.0611	60.4893	132.072	95.8146	163.25	175.071	127.297	0	812.393	947.081	192.118	159.477	529.467	252.934	190.851	248.299	0.22:0.23:0.51:0.37:0.63:0.68:0.49:0.00:3.14:3.66:0.74:0.62:2.04:0.98:0.74:0.96	86.1092	188.717	527.767	305.388	0.31:0.68:1.91:1.10	77861	Fermitin family homolog 2 OS=Homo sapiens OX=9606 GN=FERMT2 PE=1 SV=1
734	TRUE	Q92485|ASM3B_HUMAN	56.31	9.01	3	3		0	0	169.392	140.279	154.608	175.929	170.379	135.865	884.672	974.84	380.62	987.434	7539.61	5892.78	4489.11	1906.72	0.00:0.00:0.11:0.09:0.10:0.12:0.11:0.09:0.59:0.65:0.25:0.66:5.03:3.93:2.99:1.27	154.836	191.668	1215.33	5185.12	0.09:0.11:0.72:3.07	50814	Acid sphingomyelinase-like phosphodiesterase 3b OS=Homo sapiens OX=9606 GN=SMPDL3B PE=1 SV=2
500	TRUE	Q8NDI1|EHBP1_HUMAN	23.93	6.5	6	6	Oxidation (M)	91.7421	95.9569	148.084	146.985	120.067	186.484	208.873	187.392	3932.49	5634.67	569.09	153.005	1461.7	549.447	1876.04	2326.03	0.08:0.09:0.13:0.13:0.11:0.17:0.19:0.17:3.56:5.10:0.51:0.14:1.32:0.50:1.70:2.10	120.692	175.704	2731.42	1553.3	0.11:0.15:2.38:1.36	140017	EH domain-binding protein 1 OS=Homo sapiens OX=9606 GN=EHBP1 PE=1 SV=3
15	TRUE	P49327|FAS_HUMAN	41.15	44.6	87	87	Acetylation (N-term); Carbamidomethylation; Oxidation (M)	965.976	1082.55	4576.69	4717.12	1561.48	1864.54	1939.97	1314.08	103445	106189	14588.1	14616.9	38727.5	23197.2	18724.6	18175.8	0.04:0.05:0.21:0.21:0.07:0.08:0.09:0.06:4.65:4.78:0.66:0.66:1.74:1.04:0.84:0.82	2835.58	1670.02	59709.9	24706.3	0.13:0.08:2.69:1.11	273427	Fatty acid synthase OS=Homo sapiens OX=9606 GN=FASN PE=1 SV=3
890	TRUE	Q9UBC2|EP15R_HUMAN	106.26	5.56	3	3		0	0	0	0	0	0	0	0	481.215	546.991	0	0	324.536	0	146.84	281.648	0.00:0.00:0.00:0.00:0.00:0.00:0.00:0.00:4.32:4.91:0.00:0.00:2.92:0.00:1.32:2.53	0	0	514.103	286.912	0.00:0.00:2.57:1.43	94255	Epidermal growth factor receptor substrate 15-like 1 OS=Homo sapiens OX=9606 GN=EPS15L1 PE=1 SV=1
389	TRUE	Q96EY7|PTCD3_HUMAN	29.7	18.87	11	11	Carbamidomethylation; Oxidation (M)	575.883	552.973	717.814	870.947	552.955	572.171	503.993	606.495	9847.26	9134.46	1312.22	1519.18	2877.4	1659.32	3046.18	3221.86	0.25:0.24:0.31:0.37:0.24:0.24:0.21:0.26:4.19:3.89:0.56:0.65:1.23:0.71:1.30:1.37	679.404	614.705	5744.65	2768.85	0.28:0.25:2.34:1.13	78550	Pentatricopeptide repeat domain-containing protein 3, mitochondrial OS=Homo sapiens OX=9606 GN=PTCD3 PE=1 SV=3
11	TRUE	Q01082|SPTB2_HUMAN	26.82	44.84	88	80	Acetylation (N-term); Carbamidomethylation; Oxidation (M)	478.064	453.466	918.271	1062.02	766.138	975.585	5296.91	5392.95	33192.7	31244.3	4231.63	3870.41	9956.65	3957.23	10843	13917.3	0.06:0.06:0.12:0.13:0.10:0.12:0.67:0.68:4.20:3.95:0.53:0.49:1.26:0.50:1.37:1.76	907.833	3146.63	18316.5	9668.55	0.11:0.39:2.29:1.21	274609	Spectrin beta chain, non-erythrocytic 1 OS=Homo sapiens OX=9606 GN=SPTBN1 PE=1 SV=2
785	TRUE	Q99996|AKAP9_HUMAN	27.2	1.28	4	4	Oxidation (M)	128.755	73.7084	196.87	211.593	141.186	159.333	227.949	210.85	1495.66	2573.22	458.287	407.569	845.411	267.452	559.231	889.929	0.23:0.13:0.36:0.38:0.26:0.29:0.41:0.38:2.70:4.65:0.83:0.74:1.53:0.48:1.01:1.61	152.732	184.829	1584.34	715.277	0.23:0.28:2.40:1.08	452987	A-kinase anchor protein 9 OS=Homo sapiens OX=9606 GN=AKAP9 PE=1 SV=4
387	TRUE	Q9BTU6|P4K2A_HUMAN	21.44	25.26	10	10	Oxidation (M)	1130.99	569.04	1548.27	1438.61	1882.16	1365.84	756.893	444.189	3566.56	3559.58	2281.63	1299.52	4116.95	1821.52	10123.1	9264.78	0.40:0.20:0.55:0.51:0.67:0.48:0.27:0.16:1.26:1.26:0.81:0.46:1.46:0.65:3.59:3.28	1171.72	1112.27	2676.82	6331.59	0.42:0.39:0.95:2.24	54022	Phosphatidylinositol 4-kinase type 2-alpha OS=Homo sapiens OX=9606 GN=PI4K2A PE=1 SV=1
564	TRUE	Q9H6X2|ANTR1_HUMAN	22.26	12.06	6	5	Oxidation (M)	288.105	318.204	354.151	359.287	255.98	242.962	175.422	335.828	3499.95	3606.77	538.211	427.526	2001.55	1030.97	995.283	673.742	0.31:0.34:0.38:0.38:0.27:0.26:0.19:0.36:3.71:3.82:0.57:0.45:2.12:1.09:1.05:0.71	329.937	285.743	2658.06	1175.39	0.30:0.26:2.39:1.06	62789	Anthrax toxin receptor 1 OS=Homo sapiens OX=9606 GN=ANTXR1 PE=1 SV=2
385	TRUE	P13861|KAP2_HUMAN	10.26	34.16	10	10	Oxidation (M)	799.35	626.732	986.606	632.332	759.751	879.53	837.41	1104.16	3386.95	3441.76	966.256	937.646	1751.4	569.394	2238.85	2080.22	0.58:0.46:0.72:0.46:0.55:0.64:0.61:0.80:2.46:2.50:0.70:0.68:1.27:0.41:1.63:1.51	827.785	895.213	2183.15	1659.96	0.59:0.64:1.57:1.19	45518	cAMP-dependent protein kinase type II-alpha regulatory subunit OS=Homo sapiens OX=9606 GN=PRKAR2A PE=1 SV=2
711	TRUE	Q8N158|GPC2_HUMAN	29.78	10.71	4	4		165.942	267.377	347.78	260.261	247.22	781.403	216.612	185.325	6753.02	6810.03	840.532	882.287	2348.57	1065.19	1791.91	2081.68	0.11:0.17:0.22:0.17:0.16:0.50:0.14:0.12:4.31:4.35:0.54:0.56:1.50:0.68:1.14:1.33	317.379	371.127	3821.47	1821.84	0.20:0.23:2.41:1.15	62830	Glypican-2 OS=Homo sapiens OX=9606 GN=GPC2 PE=2 SV=1
606	TRUE	Q9BTW9|TBCD_HUMAN	23.52	5.45	5	5	Oxidation (M)	73.4641	50.4424	115.313	141.64	99.2726	137.485	185.049	120.936	2191.5	1968.37	179.841	243.177	809.361	300.823	649.534	792.361	0.15:0.10:0.23:0.28:0.20:0.27:0.37:0.24:4.35:3.91:0.36:0.48:1.61:0.60:1.29:1.57	95.2148	135.686	1538.89	755.026	0.15:0.21:2.44:1.20	132600	Tubulin-specific chaperone D OS=Homo sapiens OX=9606 GN=TBCD PE=1 SV=2
1078	TRUE	Q9BRK4|LZTS2_HUMAN	63.84	4.78	2	2		0	0	0	0	0	52.3751	0	52.1522	878.13	834.934	141.462	2799.55	821.135	358.545	380.13	522.587	0.00:0.00:0.00:0.00:0.00:0.12:0.00:0.12:2.05:1.95:0.33:6.55:1.92:0.84:0.89:1.22	0	52.2636	1308.62	520.599	0.00:0.11:2.78:1.11	72759	Leucine zipper putative tumor suppressor 2 OS=Homo sapiens OX=9606 GN=LZTS2 PE=1 SV=2
1127	TRUE	Q9ULV8|CBLC_HUMAN	80.22	4.43	2	2		0	0	0	0	0	0	0	0	1780.75	1325.14	217.999	131.518	574.371	183.151	397.319	249.454	0.00:0.00:0.00:0.00:0.00:0.00:0.00:0.00:5.86:4.36:0.72:0.43:1.89:0.60:1.31:0.82	0	0	997.824	477.121	0.00:0.00:2.71:1.29	52456	E3 ubiquitin-protein ligase CBL-C OS=Homo sapiens OX=9606 GN=CBLC PE=1 SV=3
671	TRUE	Q13177|PAK2_HUMAN	60.56	9.54	5	5		0	0	0	0	101.388	115.344	0	0	2358.49	1650.96	387.631	158.9	617.13	331.429	728.824	220.266	0.00:0.00:0.00:0.00:0.24:0.28:0.00:0.00:5.66:3.96:0.93:0.38:1.48:0.79:1.75:0.53	0	108.366	1315.22	670.917	0.00:0.21:2.51:1.28	58043	Serine/threonine-protein kinase PAK 2 OS=Homo sapiens OX=9606 GN=PAK2 PE=1 SV=3
169	TRUE	Q08431|MFGM_HUMAN	66.94	54.01	21	21	Oxidation (M)	7878.05	8192.63	22141.3	22662.3	177730	182663	90049.7	97606.4	2551.57	3051.61	2733.44	819.457	4688.24	4711.09	5453.66	5364.97	0.20:0.21:0.56:0.57:4.46:4.58:2.26:2.45:0.06:0.08:0.07:0.02:0.12:0.12:0.14:0.13	15218.6	137012	2289.02	5054.49	0.38:3.43:0.06:0.13	43105	Lactadherin OS=Homo sapiens OX=9606 GN=MFGE8 PE=1 SV=3
497	TRUE	Q9NYT0|PLEK2_HUMAN	23.6	20.4	6	6	Acetylation (N-term); Oxidation (M)	1242.26	1184.65	1857.71	1933.25	1942.14	2275.65	3441.53	3142.5	29917.5	26276.4	12472.8	11698.9	2252.58	24836.2	829.119	2028.85	0.16:0.15:0.23:0.24:0.24:0.29:0.43:0.39:3.76:3.30:1.57:1.47:0.28:3.12:0.10:0.25	1554.47	2700.46	20091.4	7486.69	0.20:0.34:2.52:0.94	39971	Pleckstrin-2 OS=Homo sapiens OX=9606 GN=PLEK2 PE=1 SV=1
567	TRUE	Q9UM47|NOTC3_HUMAN	28.99	2.02	5	3	Oxidation (M)	60.7943	94.3658	118.9	99.4257	81.1781	102.472	94.593	130.373	873.244	527.345	187.695	186.865	577.248	223.488	1087.76	2021.82	0.15:0.23:0.29:0.25:0.20:0.25:0.23:0.32:2.16:1.30:0.46:0.46:1.43:0.55:2.69:5.00	93.3714	102.154	443.787	1019.81	0.23:0.25:1.07:2.46	243631	Neurogenic locus notch homolog protein 3 OS=Homo sapiens OX=9606 GN=NOTCH3 PE=1 SV=2
772	TRUE	P78504|JAG1_HUMAN	65.5	2.79	3	3		327.999	339.953	296.083	256.579	190.601	240.194	268.059	271.578	6912.19	6271.47	2194.55	2302.39	896.009	799.572	1291.51	953.009	0.22:0.23:0.20:0.17:0.13:0.16:0.18:0.18:4.64:4.21:1.47:1.55:0.60:0.54:0.87:0.64	305.154	263.124	4420.15	985.025	0.20:0.18:2.96:0.66	133799	Protein jagged-1 OS=Homo sapiens OX=9606 GN=JAG1 PE=1 SV=3
639	TRUE	P50479|PDLI4_HUMAN	57.72	22.42	6	6	Oxidation (M)	0	55.7133	0	56.0239	0	0	0	0	2975.61	3196.46	250.048	192.701	696.74	514.933	729.328	963.539	0.00:0.09:0.00:0.09:0.00:0.00:0.00:0.00:4.94:5.31:0.42:0.32:1.16:0.86:1.21:1.60	55.8686	0	2035.31	791.396	0.08:0.00:2.82:1.10	35398	PDZ and LIM domain protein 4 OS=Homo sapiens OX=9606 GN=PDLIM4 PE=1 SV=2
151	TRUE	P50895|BCAM_HUMAN	93.16	43.31	19	19	Carbamidomethylation; Oxidation (M)	421.695	496.648	1135.12	932.066	1891.94	1912	1370.49	1235.14	6284.67	6467.29	7507.38	8640.72	74940.1	54824.6	106945	121939	0.02:0.02:0.05:0.04:0.08:0.08:0.06:0.05:0.25:0.26:0.30:0.35:3.02:2.21:4.31:4.92	773.798	1602.39	7225.01	89662.3	0.03:0.06:0.29:3.61	67405	Basal cell adhesion molecule OS=Homo sapiens OX=9606 GN=BCAM PE=1 SV=2
312	TRUE	O95359|TACC2_HUMAN	21.3	3.49	7	7	Oxidation (M)	312.656	119.179	399.104	366.93	311.058	294.666	597.308	602.926	1054.32	1071.61	322.855	345.398	2014.09	580.132	1999.89	2911.67	0.38:0.14:0.48:0.44:0.37:0.35:0.72:0.73:1.27:1.29:0.39:0.42:2.42:0.70:2.41:3.50	323.076	543.629	777.133	1876.44	0.37:0.62:0.88:2.13	309427	Transforming acidic coiled-coil-containing protein 2 OS=Homo sapiens OX=9606 GN=TACC2 PE=1 SV=3
758	TRUE	Q96RD7|PANX1_HUMAN	9.96	13.62	4	4	Oxidation (M)	847.053	986.309	2627.44	2619.05	1099.6	1524.93	1083.82	610.299	9056.76	8595.9	867.349	1082.07	4622.81	2638.36	3828.12	4750.24	0.29:0.34:0.90:0.89:0.38:0.52:0.37:0.21:3.09:2.94:0.30:0.37:1.58:0.90:1.31:1.62	1810.03	1101.42	5270.2	3997.54	0.59:0.36:1.73:1.31	48050	Pannexin-1 OS=Homo sapiens OX=9606 GN=PANX1 PE=1 SV=4
249	TRUE	Q68CP9|ARID2_HUMAN	9.43	10.84	15	15	Oxidation (M)	253.181	351.993	719.868	264.932	378.844	489.866	442.76	516.835	2316.32	3110.48	312.832	441.438	1886.25	428.428	1026.4	1921.53	0.27:0.38:0.77:0.29:0.41:0.53:0.48:0.56:2.49:3.35:0.34:0.48:2.03:0.46:1.10:2.07	412.031	490.66	1545.27	1315.65	0.44:0.52:1.64:1.40	197391	AT-rich interactive domain-containing protein 2 OS=Homo sapiens OX=9606 GN=ARID2 PE=1 SV=2
13	TRUE	P21333|FLNA_HUMAN	51.05	46.51	96	88	Carbamidomethylation; Oxidation (M)	1537.04	2120	1253.07	1108.93	2902.91	2206.05	2461.71	1076.74	119575	120774	17428.1	17847.2	31001.5	14739.6	21874	26634.4	0.06:0.09:0.05:0.05:0.12:0.09:0.10:0.04:4.98:5.03:0.73:0.74:1.29:0.61:0.91:1.11	1621.41	2246.75	68906.1	23562.4	0.07:0.09:2.86:0.98	280739	Filamin-A OS=Homo sapiens OX=9606 GN=FLNA PE=1 SV=4
913	TRUE	Q8IY63|AMOL1_HUMAN	124.02	3.87	3	3		0	0	0	0	0	0	0	0	948.005	739.475	0	0	215.53	153.726	323.372	258.247	0.00:0.00:0.00:0.00:0.00:0.00:0.00:0.00:5.75:4.48:0.00:0.00:1.31:0.93:1.96:1.57	0	0	843.74	237.719	0.00:0.00:3.12:0.88	106574	Angiomotin-like protein 1 OS=Homo sapiens OX=9606 GN=AMOTL1 PE=1 SV=1
217	TRUE	O95782|AP2A1_HUMAN	33.01	14.02	15	10	Oxidation (M)	0	56.7827	157.66	237.472	306.279	370.895	254.205	307.041	4911.03	4642.6	808.263	774.589	2330.01	2027.65	11397.1	1917.16	0.00:0.03:0.08:0.12:0.16:0.19:0.13:0.16:2.58:2.44:0.42:0.41:1.22:1.06:5.98:1.01	174.172	309.605	3334.8	4417.98	0.08:0.15:1.62:2.15	107546	AP-2 complex subunit alpha-1 OS=Homo sapiens OX=9606 GN=AP2A1 PE=1 SV=3
494	TRUE	O60291|MGRN1_HUMAN	18.13	20.29	8	8	Oxidation (M)	647.659	772.865	322.504	281.156	1211.1	655.523	555.58	638.913	10535.7	10512.5	706.019	1012.21	3735.11	1290.9	3630.13	4314.49	0.25:0.30:0.13:0.11:0.47:0.26:0.22:0.25:4.13:4.12:0.28:0.40:1.46:0.51:1.42:1.69	563.626	786.105	6422.33	3242.66	0.20:0.29:2.33:1.18	60753	E3 ubiquitin-protein ligase MGRN1 OS=Homo sapiens OX=9606 GN=MGRN1 PE=1 SV=2
877	TRUE	Q14678|KANK1_HUMAN	106.12	3.62	3	3		0	0	0	0	0	0	0	0	660.904	903.818	548.489	0	254.225	0	84.7107	151.601	0.00:0.00:0.00:0.00:0.00:0.00:0.00:0.00:4.06:5.55:3.37:0.00:1.56:0.00:0.52:0.93	0	0	842.025	186.898	0.00:0.00:3.27:0.73	147289	KN motif and ankyrin repeat domain-containing protein 1 OS=Homo sapiens OX=9606 GN=KANK1 PE=1 SV=3
258	TRUE	P38606|VATA_HUMAN	8.08	26.58	12	12	Oxidation (M)	846.041	1202.94	1216.9	1783.85	757.74	2598.77	2049.89	1633.56	11026.4	8684.28	943.871	768.386	6351.18	2509.13	3558.41	7075.82	0.26:0.36:0.37:0.54:0.23:0.78:0.62:0.49:3.33:2.62:0.28:0.23:1.92:0.76:1.07:2.14	1262.43	1759.99	5355.74	4873.64	0.38:0.53:1.62:1.47	68304	V-type proton ATPase catalytic subunit A OS=Homo sapiens OX=9606 GN=ATP6V1A PE=1 SV=2
905	TRUE	Q04760|LGUL_HUMAN	16.07	20.65	4	4	Oxidation (M)	545.021	494.3	450.185	466.516	649.435	912.984	1293.36	1042.47	4185.83	4016.15	829.543	752.541	2906.87	1652.09	1607.58	829.194	0.39:0.35:0.32:0.33:0.46:0.65:0.91:0.74:2.96:2.84:0.59:0.53:2.05:1.17:1.14:0.59	489.005	974.561	2446.02	1748.93	0.35:0.69:1.73:1.24	20778	Lactoylglutathione lyase OS=Homo sapiens OX=9606 GN=GLO1 PE=1 SV=4
362	TRUE	P20936|RASA1_HUMAN	38.23	14.23	10	10	Carbamidomethylation; Oxidation (M)	54.2762	63.675	363.333	105.432	105.227	215.896	231.899	165.621	6609.72	6424.14	1123.54	700.704	1370.48	1180.44	1225.54	1573.37	0.04:0.05:0.27:0.08:0.08:0.16:0.17:0.12:4.92:4.78:0.84:0.52:1.02:0.88:0.91:1.17	289.157	202.854	4245.84	1337.46	0.19:0.13:2.80:0.88	116403	Ras GTPase-activating protein 1 OS=Homo sapiens OX=9606 GN=RASA1 PE=1 SV=1
226	TRUE	P42356|PI4KA_HUMAN	18.6	5.42	9	9	Oxidation (M)	0	0	0	384.283	0	0	759.449	438.625	1715.7	1575.67	86.9039	66.4631	1374.77	379.333	514.122	1094.42	0.00:0.00:0.00:0.73:0.00:0.00:1.45:0.84:3.27:3.00:0.17:0.13:2.62:0.72:0.98:2.09	384.283	599.037	1560.83	840.66	0.45:0.71:1.84:0.99	236830	Phosphatidylinositol 4-kinase alpha OS=Homo sapiens OX=9606 GN=PI4KA PE=1 SV=4
133	TRUE	Q92974|ARHG2_HUMAN	41.01	31.24	22	22	Carbamidomethylation; Oxidation (M)	345.064	326.906	455.604	361.645	235.763	272.192	376.23	391.668	9104.84	8283.45	1620.65	1521.84	2735.69	1950.74	1268.84	1156.49	0.18:0.17:0.24:0.19:0.12:0.14:0.20:0.21:4.79:4.36:0.85:0.80:1.44:1.03:0.67:0.61	372.305	364.181	5132.7	1777.94	0.19:0.19:2.68:0.93	111543	Rho guanine nucleotide exchange factor 2 OS=Homo sapiens OX=9606 GN=ARHGEF2 PE=1 SV=4
115	TRUE	Q8IZJ1|UNC5B_HUMAN	36.69	36.93	28	28	Carbamidomethylation; Oxidation (M)	6981.18	925.223	1511.32	4410.92	7439.78	7842.37	1859.27	1837.79	8778.76	8155.8	3104.24	4209.5	59217.2	32081	59825	61996.8	0.41:0.05:0.09:0.26:0.44:0.46:0.11:0.11:0.52:0.48:0.18:0.25:3.51:1.90:3.54:3.67	3457.16	4744.81	6062.07	53280	0.20:0.28:0.36:3.16	103638	Netrin receptor UNC5B OS=Homo sapiens OX=9606 GN=UNC5B PE=1 SV=2
213	TRUE	Q8IVT2|MISP_HUMAN	30.4	36.38	17	17		615.082	783.726	1004.21	1082.13	600.074	716.862	1299.1	1232.09	23152.5	20217.7	2692.45	2525.23	7644.47	3208.54	4201.01	6001.52	0.13:0.16:0.21:0.22:0.12:0.15:0.27:0.26:4.81:4.20:0.56:0.52:1.59:0.67:0.87:1.25	871.289	962.031	12147	5263.88	0.18:0.20:2.52:1.09	75357	Mitotic interactor and substrate of PLK1 OS=Homo sapiens OX=9606 GN=MISP PE=1 SV=1
748	TRUE	Q8IWK6|AGRA3_HUMAN	61.99	3.94	4	4		0	0	0	0	90.1015	56.5021	0	0	12282	8781.77	715.015	771.841	4262.75	1255.73	1414.92	2968.99	0.00:0.00:0.00:0.00:0.04:0.03:0.00:0.00:6.03:4.31:0.35:0.38:2.09:0.62:0.69:1.46	0	73.3018	5724.85	2475.6	0.00:0.04:2.77:1.20	146151	Adhesion G protein-coupled receptor A3 OS=Homo sapiens OX=9606 GN=ADGRA3 PE=1 SV=2
685	TRUE	Q8N6H7|ARFG2_HUMAN	37.32	13.82	6	6	Oxidation (M)	360.18	410.906	602.296	677.208	444.323	473.288	906.068	761.806	1560.45	1601.33	643.428	665.452	6416.8	2733.35	2065.26	2961.05	0.25:0.28:0.41:0.47:0.31:0.33:0.62:0.52:1.07:1.10:0.44:0.46:4.41:1.88:1.42:2.03	571.478	766.384	1117.66	3544.12	0.38:0.51:0.75:2.36	56720	ADP-ribosylation factor GTPase-activating protein 2 OS=Homo sapiens OX=9606 GN=ARFGAP2 PE=1 SV=1
611	TRUE	P21964|COMT_HUMAN	27.84	23.62	4	4	Carbamidomethylation; Oxidation (M)	1263.17	3494.67	2213.7	1472.73	461.812	1245.1	1115.6	482.253	17187.1	17143.9	3287.52	3067.45	3887.58	2289.99	5276.32	6453.42	0.29:0.79:0.50:0.33:0.11:0.28:0.25:0.11:3.91:3.90:0.75:0.70:0.88:0.52:1.20:1.47	2161.1	906.069	10171.5	4476.83	0.49:0.20:2.30:1.01	30037	Catechol O-methyltransferase OS=Homo sapiens OX=9606 GN=COMT PE=1 SV=2
573	TRUE	Q9Y5K6|CD2AP_HUMAN	30.58	11.74	6	6		55.6379	61.9224	82.8004	90.3843	212.046	306.949	1440.41	866.21	1955.7	1956.73	317.164	284.068	1383.7	760.598	988.144	1026.03	0.08:0.08:0.11:0.12:0.29:0.42:1.96:1.18:2.65:2.66:0.43:0.39:1.88:1.03:1.34:1.39	72.6862	732.699	1256.8	1090.63	0.09:0.93:1.59:1.38	71451	CD2-associated protein OS=Homo sapiens OX=9606 GN=CD2AP PE=1 SV=1
27	TRUE	O75691|UTP20_HUMAN	30.02	26.79	57	57	Acetylation (N-term); Carbamidomethylation; Oxidation (M)	1103.84	394.022	494.648	463.402	311.054	421.377	627.421	696.551	15072.9	15834	2065.88	1384.33	6020.25	2315.67	2959.01	3348.86	0.33:0.12:0.15:0.14:0.09:0.13:0.19:0.21:4.51:4.73:0.62:0.41:1.80:0.69:0.88:1.00	613.979	561.446	8589.28	3660.94	0.18:0.17:2.56:1.09	318385	Small subunit processome component 20 homolog OS=Homo sapiens OX=9606 GN=UTP20 PE=1 SV=3
66	TRUE	P35580|MYH10_HUMAN	10.42	16.24	33	23	Carbamidomethylation; Oxidation (M)	714.183	829.382	1260.98	1212.3	354.705	437.035	1640.32	1343.9	5334.04	5827.42	1029.49	981.765	3229.95	1198.57	2502.84	2027.52	0.38:0.44:0.67:0.65:0.19:0.23:0.88:0.72:2.85:3.12:0.55:0.52:1.73:0.64:1.34:1.08	1026.57	943.991	3293.18	2239.72	0.55:0.50:1.76:1.19	228999	Myosin-10 OS=Homo sapiens OX=9606 GN=MYH10 PE=1 SV=3
390	TRUE	Q14344|GNA13_HUMAN	24.58	25.99	9	8		825.173	524.912	576.505	987.795	3428.22	4559.32	2166.5	1886.77	5642.22	5325.23	1009.29	1071.26	5297.43	2956.07	4669.57	5800.46	0.28:0.18:0.20:0.34:1.17:1.56:0.74:0.65:1.93:1.82:0.35:0.37:1.81:1.01:1.60:1.99	728.596	3010.2	3262	4680.88	0.25:1.03:1.12:1.60	44050	Guanine nucleotide-binding protein subunit alpha-13 OS=Homo sapiens OX=9606 GN=GNA13 PE=1 SV=2
486	TRUE	P22059|OSBP1_HUMAN	35.56	14.75	9	9	Carbamidomethylation; Oxidation (M)	234.19	224.698	247.35	299.188	353.679	384.885	402.865	320.808	10529.8	2496.97	945.738	2700.87	1849.82	1375.3	1680.6	9444.26	0.11:0.11:0.12:0.14:0.17:0.18:0.19:0.15:5.03:1.19:0.45:1.29:0.88:0.66:0.80:4.51	296.608	393.459	4168.34	3587.49	0.14:0.19:1.97:1.70	89421	Oxysterol-binding protein 1 OS=Homo sapiens OX=9606 GN=OSBP PE=1 SV=1
710	TRUE	Q9H2J7|S6A15_HUMAN	29.24	10	5	5		732.45	754.095	1085.95	1132.59	493.71	585.297	497.114	216.299	6750.52	6190.24	1232.81	1803.86	1597.34	994.021	1824.97	2176.27	0.42:0.43:0.62:0.65:0.28:0.33:0.28:0.12:3.85:3.53:0.70:1.03:0.91:0.57:1.04:1.24	1026.09	507.817	4045.12	1648.15	0.57:0.28:2.24:0.91	81836	Sodium-dependent neutral amino acid transporter B(0)AT2 OS=Homo sapiens OX=9606 GN=SLC6A15 PE=1 SV=1
1187	TRUE	Q9NRD5|PICK1_HUMAN	90.84	5.3	2	2		0	0	0	0	0	0	0	0	1997.26	902.297	334.596	401.535	601.936	98.2201	157.986	190.125	0.00:0.00:0.00:0.00:0.00:0.00:0.00:0.00:6.82:3.08:1.14:1.37:2.06:0.34:0.54:0.65	0	0	1090.55	315.461	0.00:0.00:3.10:0.90	46600	PRKCA-binding protein OS=Homo sapiens OX=9606 GN=PICK1 PE=1 SV=2
725	TRUE	P18084|ITB5_HUMAN	17.67	4.38	3	3	Oxidation (M)	673.706	524.274	1627.06	1940.31	3770.53	3759.12	1797.32	1730.48	7090.21	5943.49	2416.36	2171.03	3728.09	1953.67	3771.49	3595.36	0.23:0.18:0.56:0.67:1.30:1.29:0.62:0.60:2.44:2.05:0.83:0.75:1.28:0.67:1.30:1.24	1247.03	2789.86	4557.47	3308.54	0.42:0.94:1.53:1.11	88054	Integrin beta-5 OS=Homo sapiens OX=9606 GN=ITGB5 PE=1 SV=1
1028	TRUE	P49768|PSN1_HUMAN	38.46	8.57	3	3	Oxidation (M)	65.329	70.0495	133.964	188.401	420.892	579.09	276.333	223.72	1222.97	977.17	0	0	1907.79	1133.61	979.174	550.581	0.12:0.13:0.25:0.35:0.77:1.06:0.51:0.41:2.24:1.79:0.00:0.00:3.50:2.08:1.79:1.01	161.446	421.735	1100.07	1142.79	0.23:0.60:1.56:1.62	52668	Presenilin-1 OS=Homo sapiens OX=9606 GN=PSEN1 PE=1 SV=1
825	TRUE	Q96NW4|ANR27_HUMAN	85.78	3.52	3	3		0	0	0	0	0	0	0	0	526.586	682.951	0	0	386.6	0	97.3578	271.046	0.00:0.00:0.00:0.00:0.00:0.00:0.00:0.00:4.29:5.56:0.00:0.00:3.15:0.00:0.79:2.21	0	0	604.769	303.235	0.00:0.00:2.66:1.34	116984	Ankyrin repeat domain-containing protein 27 OS=Homo sapiens OX=9606 GN=ANKRD27 PE=1 SV=2
117	TRUE	Q8WUM4|PDC6I_HUMAN	13.29	41.82	31	31	Acetylation (N-term); Carbamidomethylation; Oxidation (M)	24073.5	24843.2	43250.1	38757.1	17164	28815.2	23107.8	19089.5	16964.8	21655.8	10487.9	9513.21	29750.2	10061.1	17068.2	24868.1	1.07:1.11:1.93:1.73:0.76:1.28:1.03:0.85:0.76:0.96:0.47:0.42:1.32:0.45:0.76:1.11	32731	22044.1	14655.4	20436.9	1.46:0.98:0.65:0.91	96023	Programmed cell death 6-interacting protein OS=Homo sapiens OX=9606 GN=PDCD6IP PE=1 SV=1
589	TRUE	Q5ZPR3|CD276_HUMAN	16.59	23.03	8	8	Carbamidomethylation	3287.38	3101.95	6152.56	5760.59	7277.07	7740.39	3245.49	3053.66	40367.1	39132.8	6995.1	7350.54	20455.9	11612.3	9047.46	8970.43	0.29:0.27:0.54:0.50:0.63:0.67:0.28:0.27:3.52:3.41:0.61:0.64:1.78:1.01:0.79:0.78	4575.62	5329.15	23461.4	12521.5	0.40:0.46:2.05:1.09	57235	CD276 antigen OS=Homo sapiens OX=9606 GN=CD276 PE=1 SV=1
236	TRUE	P04439|HLAA_HUMAN	25.71	24.11	14	8	Carbamidomethylation	12554.2	12020.4	27818.1	28273.8	48436.7	42998.4	17604.9	17080.6	35943.2	34782.5	20590.4	21664.3	84839.4	85820.8	67356.6	62189.8	0.32:0.31:0.72:0.73:1.25:1.11:0.45:0.44:0.93:0.90:0.53:0.56:2.19:2.21:1.74:1.60	20166.6	31530.2	28245.1	75051.6	0.52:0.81:0.73:1.94	40841	HLA class I histocompatibility antigen, A alpha chain OS=Homo sapiens OX=9606 GN=HLA-A PE=1 SV=2
273	TRUE	Q96TA1|NIBA2_HUMAN	9.73	21.85	11	11	Oxidation (M)	1022.62	1083.69	1002.12	1262.59	1296.71	1560.3	1414.58	1457.75	6556	6549.26	912.443	1252.46	3847.19	1651.78	2231.87	3673.32	0.44:0.47:0.44:0.55:0.56:0.68:0.62:0.63:2.85:2.85:0.40:0.54:1.67:0.72:0.97:1.60	1092.76	1432.34	3817.54	2851.04	0.48:0.62:1.66:1.24	84138	Protein Niban 2 OS=Homo sapiens OX=9606 GN=NIBAN2 PE=1 SV=3
723	TRUE	Q08357|S20A2_HUMAN	12.41	11.66	5	5		491.04	349.32	229.143	202.302	419.633	396.659	229.078	222.453	2724.32	3102.14	258.249	369.286	1008.47	563.389	1107.49	1239.97	0.61:0.43:0.28:0.25:0.52:0.49:0.28:0.28:3.38:3.84:0.32:0.46:1.25:0.70:1.37:1.54	347.855	365.098	1986.06	1022.62	0.37:0.39:2.13:1.10	70392	Sodium-dependent phosphate transporter 2 OS=Homo sapiens OX=9606 GN=SLC20A2 PE=1 SV=1
883	TRUE	P61769|B2MG_HUMAN	21.57	35.29	3	3	Carbamidomethylation	4305.24	3732.82	11600.5	14259.2	15442.2	20376.5	10648.7	9609.94	23083.6	23919.7	5835.04	6043.71	47317.6	23543.7	50965.7	58513.9	0.21:0.18:0.56:0.69:0.75:0.99:0.52:0.47:1.12:1.16:0.28:0.29:2.30:1.14:2.48:2.84	8474.44	14019.3	14720.5	45085.2	0.41:0.68:0.72:2.19	13715	Beta-2-microglobulin OS=Homo sapiens OX=9606 GN=B2M PE=1 SV=1
988	TRUE	O15121|DEGS1_HUMAN	19.62	15.79	3	3	Oxidation (M)	472.522	220.618	100.408	127.621	181.726	387.083	373.073	319.106	6175.09	2531.17	386.758	291.097	1871.49	1108.02	1321.25	2260.46	0.42:0.19:0.09:0.11:0.16:0.34:0.33:0.28:5.45:2.23:0.34:0.26:1.65:0.98:1.17:2.00	332.886	363.085	2874.74	1817.88	0.25:0.27:2.13:1.35	37866	Sphingolipid delta(4)-desaturase DES1 OS=Homo sapiens OX=9606 GN=DEGS1 PE=1 SV=1
876	TRUE	P46019|KPB2_HUMAN	21.54	4.05	3	3	Oxidation (M)	144.612	186.198	210.985	253.364	580.678	629.903	591.138	585.756	1774.17	2478.14	366.473	314.833	882.783	691.816	977.068	1100.04	0.20:0.25:0.29:0.34:0.79:0.86:0.80:0.80:2.41:3.37:0.50:0.43:1.20:0.94:1.33:1.50	198.79	596.869	1505.39	937.67	0.25:0.74:1.86:1.16	138408	Phosphorylase b kinase regulatory subunit alpha, liver isoform OS=Homo sapiens OX=9606 GN=PHKA2 PE=1 SV=1
727	TRUE	Q9Y6M5|ZNT1_HUMAN	13.7	22.49	6	6		3385.26	3661.44	9390.3	8898.6	4188.13	4983.6	3741.95	4925.73	44692	50300.5	5629.53	5735.61	18768.5	9611.78	14507.6	20068.5	0.25:0.28:0.71:0.67:0.32:0.38:0.28:0.37:3.37:3.79:0.42:0.43:1.41:0.72:1.09:1.51	6333.9	4483.61	26589.4	15739.1	0.48:0.34:2.00:1.18	55300	Zinc transporter 1 OS=Homo sapiens OX=9606 GN=SLC30A1 PE=1 SV=3
221	TRUE	Q92888|ARHG1_HUMAN	13.88	17.11	12	12	Oxidation (M)	256.414	436.24	918.662	1360.92	523.247	227.365	862.679	615.783	7673.08	8255.33	667.986	769.273	2787.76	1334.92	2217.55	3372.89	0.13:0.22:0.46:0.67:0.26:0.11:0.43:0.31:3.80:4.09:0.33:0.38:1.38:0.66:1.10:1.67	796.872	600.945	5682.98	2578.95	0.33:0.25:2.35:1.07	102435	Rho guanine nucleotide exchange factor 1 OS=Homo sapiens OX=9606 GN=ARHGEF1 PE=1 SV=2
819	TRUE	Q9Y696|CLIC4_HUMAN	13.99	17.79	5	4	Oxidation (M)	302.386	378.293	459.715	541.533	944.452	785.857	775.077	621.182	1757.99	2234.07	534.175	539.743	1673.54	982.152	669.804	1126.42	0.34:0.42:0.51:0.60:1.05:0.88:0.87:0.69:1.96:2.50:0.60:0.60:1.87:1.10:0.75:1.26	461.618	856.819	1330.97	1112.98	0.49:0.91:1.42:1.18	28772	Chloride intracellular channel protein 4 OS=Homo sapiens OX=9606 GN=CLIC4 PE=1 SV=4
18	TRUE	Q00610|CLH1_HUMAN	16.03	40.84	66	51	Carbamidomethylation; Oxidation (M)	14102.7	13243.6	27680.9	33339	7143.67	9860.8	9359.54	9201.4	84395.1	93981.1	14366.1	14000.8	39882.9	19706.3	39353.8	44251.2	0.48:0.45:0.93:1.13:0.24:0.33:0.32:0.31:2.85:3.17:0.49:0.47:1.35:0.67:1.33:1.49	22091.6	8891.35	51685.8	35798.5	0.75:0.30:1.75:1.21	191615	Clathrin heavy chain 1 OS=Homo sapiens OX=9606 GN=CLTC PE=1 SV=5
399	TRUE	P20591|MX1_HUMAN	73.37	15.56	8	7	Oxidation (M)	106.286	98.5562	123.719	115.289	437.012	233.651	322.712	172.893	402.881	402.08	190.503	242.631	4504.67	2180.17	2550.76	2790.45	0.11:0.11:0.13:0.12:0.47:0.25:0.35:0.19:0.43:0.43:0.20:0.26:4.85:2.35:2.74:3.00	110.962	397.686	309.524	3006.51	0.12:0.42:0.32:3.14	75520	Interferon-induced GTP-binding protein Mx1 OS=Homo sapiens OX=9606 GN=MX1 PE=1 SV=4
766	TRUE	O00220|TR10A_HUMAN	24.63	12.39	4	4	Oxidation (M)	515.234	650.525	958.862	566.451	445.879	330.001	274.578	270.288	3847.32	3437.57	831.605	720.205	1000.52	768.877	1379.75	1193.27	0.48:0.61:0.89:0.53:0.41:0.31:0.26:0.25:3.58:3.20:0.77:0.67:0.93:0.72:1.28:1.11	672.768	359.518	2209.17	1085.6	0.62:0.33:2.04:1.00	50089	Tumor necrosis factor receptor superfamily member 10A OS=Homo sapiens OX=9606 GN=TNFRSF10A PE=1 SV=3
914	TRUE	P53597|SUCA_HUMAN	8.54	10.69	3	3	Oxidation (M)	0	0	50.1446	59.3554	0	0	95.5418	52.389	3784.92	3849.06	235.616	111.127	1523.91	67.735	1284.32	728.511	0.00:0.00:0.07:0.08:0.00:0.00:0.13:0.07:5.11:5.20:0.32:0.15:2.06:0.09:1.74:0.98	54.75	73.9654	2499.11	985.406	0.06:0.08:2.77:1.09	36250	Succinate--CoA ligase [ADP/GDP-forming] subunit alpha, mitochondrial OS=Homo sapiens OX=9606 GN=SUCLG1 PE=1 SV=4
113	TRUE	Q9P273|TEN3_HUMAN	35.67	16.9	30	29	Carbamidomethylation; Oxidation (M)	877.72	1104.61	1765.33	1723.34	683.346	1065.51	931.61	980.765	14632.1	15281.6	3534.37	3586.65	4172.57	2630.54	1951.75	3288.07	0.24:0.30:0.49:0.47:0.19:0.29:0.26:0.27:4.02:4.20:0.97:0.99:1.15:0.72:0.54:0.90	1367.75	950.113	9258.69	3010.73	0.38:0.26:2.54:0.83	300950	Teneurin-3 OS=Homo sapiens OX=9606 GN=TENM3 PE=1 SV=3
765	TRUE	Q96SB3|NEB2_HUMAN	65.29	6.73	4	4		0	0	0	0	0	0	0	0	954.921	2127.83	78.7882	0	2592.36	582.459	282.318	414.019	0.00:0.00:0.00:0.00:0.00:0.00:0.00:0.00:2.17:4.84:0.18:0.00:5.90:1.33:0.64:0.94	0	0	1405.28	2395.69	0.00:0.00:1.48:2.52	89334	Neurabin-2 OS=Homo sapiens OX=9606 GN=PPP1R9B PE=1 SV=3
393	TRUE	P48960|AGRE5_HUMAN	18.24	18.08	10	10	Oxidation (M)	2867.42	1650.32	5633.1	5061.38	1976.16	2759.8	2499.1	3050.06	31548.9	31674.1	4180.33	5359.95	11570.1	8021.51	5486.64	10530.8	0.34:0.20:0.67:0.60:0.24:0.33:0.30:0.36:3.77:3.79:0.50:0.64:1.38:0.96:0.66:1.26	3803.06	2571.28	18190.8	8902.28	0.45:0.31:2.17:1.06	91869	Adhesion G protein-coupled receptor E5 OS=Homo sapiens OX=9606 GN=ADGRE5 PE=1 SV=4
903	TRUE	P07602|SAP_HUMAN	44.48	9.73	4	4	Oxidation (M)	214.075	208.944	664.544	597.121	754.038	859.423	421.705	520.352	1189.84	769.728	623.077	577.757	3846.53	2334.97	5895.25	6510.89	0.13:0.13:0.41:0.37:0.46:0.53:0.26:0.32:0.73:0.47:0.38:0.36:2.37:1.44:3.63:4.01	497.491	638.88	834.557	4646.91	0.30:0.39:0.50:2.81	58113	Prosaposin OS=Homo sapiens OX=9606 GN=PSAP PE=1 SV=2
892	TRUE	Q92896|GSLG1_HUMAN	19.24	3.73	4	4	Oxidation (M)	1191.63	1356.13	1182.25	1117.1	1086.47	497.506	710.267	906.072	2512.28	2228.55	867.586	697.877	5231.16	1893.45	1786.54	3379.04	0.72:0.81:0.71:0.67:0.65:0.30:0.43:0.54:1.51:1.34:0.52:0.42:3.14:1.14:1.07:2.03	1211.78	800.079	1576.57	3072.55	0.73:0.48:0.95:1.85	134552	Golgi apparatus protein 1 OS=Homo sapiens OX=9606 GN=GLG1 PE=1 SV=2
302	TRUE	Q01518|CAP1_HUMAN	13.08	22.53	9	9	Carbamidomethylation; Oxidation (M)	371.844	336.025	390.778	603.396	484.93	1184.44	1153.37	869.634	3931.72	2983.15	497.164	563.388	1878.39	919.95	1786.27	1502.44	0.31:0.28:0.32:0.50:0.40:0.97:0.95:0.72:3.23:2.45:0.41:0.46:1.54:0.76:1.47:1.24	474.998	1008.78	1993.86	1521.76	0.38:0.81:1.60:1.22	51901	Adenylyl cyclase-associated protein 1 OS=Homo sapiens OX=9606 GN=CAP1 PE=1 SV=5
50	TRUE	P05023|AT1A1_HUMAN	7.22	28.54	45	26	Carbamidomethylation; Oxidation (M)	32103.1	41182.2	89935.3	89006	50834.2	72425.5	40865.7	36694.9	139427	156568	41432.3	53121.9	100840	55355.7	116839	194863	0.39:0.50:1.10:1.09:0.62:0.88:0.50:0.45:1.70:1.91:0.51:0.65:1.23:0.68:1.43:2.38	63056.7	50205.1	97637.3	116974	0.77:0.61:1.19:1.43	112896	Sodium/potassium-transporting ATPase subunit alpha-1 OS=Homo sapiens OX=9606 GN=ATP1A1 PE=1 SV=1
323	TRUE	Q9BQ39|DDX50_HUMAN	13.54	20.35	11	11	Oxidation (M)	3655.55	3692.14	5677.21	5535.88	3462.16	5339.85	5005.59	5459.07	30919.8	26568.8	5378.11	5327.53	9442.26	6631.23	12422.6	11463.6	0.40:0.40:0.62:0.61:0.38:0.59:0.55:0.60:3.39:2.91:0.59:0.58:1.03:0.73:1.36:1.26	4640.19	4816.67	17048.5	9989.91	0.51:0.53:1.87:1.09	82565	ATP-dependent RNA helicase DDX50 OS=Homo sapiens OX=9606 GN=DDX50 PE=1 SV=1
628	TRUE	Q05655|KPCD_HUMAN	31.3	7.69	4	4	Oxidation (M)	206.778	140.416	315.176	394.41	238.519	544.546	303.228	331.383	4122.12	4355.06	981.347	877.167	935.588	718.564	1187.67	534.714	0.20:0.14:0.31:0.39:0.24:0.54:0.30:0.33:4.07:4.30:0.97:0.87:0.92:0.71:1.17:0.53	353.723	497.481	2583.92	899.479	0.33:0.46:2.38:0.83	77505	Protein kinase C delta type OS=Homo sapiens OX=9606 GN=PRKCD PE=1 SV=2
792	TRUE	O60503|ADCY9_HUMAN	45.81	3.99	4	4		77.1716	64.1525	94.928	74.8775	103.689	131.247	91.1173	128.783	818.791	769.512	0	0	535.529	171.73	265.949	518.125	0.32:0.27:0.39:0.31:0.43:0.55:0.38:0.54:3.41:3.20:0.00:0.00:2.23:0.71:1.11:2.16	77.7824	113.709	794.151	438.644	0.22:0.32:2.23:1.23	150701	Adenylate cyclase type 9 OS=Homo sapiens OX=9606 GN=ADCY9 PE=1 SV=4
321	TRUE	Q13618|CUL3_HUMAN	14.43	15.49	10	10		422.35	588.831	584.211	630.02	1110.93	882.417	534.892	2578.94	5475.08	4602.83	875.468	889.233	2985.82	1958.25	1412.21	1746.92	0.25:0.35:0.34:0.37:0.65:0.52:0.31:1.51:3.21:2.70:0.51:0.52:1.75:1.15:0.83:1.02	556.353	1276.79	2960.65	2025.8	0.33:0.75:1.74:1.19	88930	Cullin-3 OS=Homo sapiens OX=9606 GN=CUL3 PE=1 SV=2
875	TRUE	Q8TAD4|ZNT5_HUMAN	106.85	4.18	2	2		0	0	0	0	0	0	0	0	489.47	502.415	0	0	115.059	0	139.67	250.241	0.00:0.00:0.00:0.00:0.00:0.00:0.00:0.00:5.23:5.37:0.00:0.00:1.23:0.00:1.49:2.67	0	0	495.942	196.238	0.00:0.00:2.87:1.13	84046	Zinc transporter 5 OS=Homo sapiens OX=9606 GN=SLC30A5 PE=1 SV=1
920	TRUE	Q13107|UBP4_HUMAN	2.98	5.4	4	4	Oxidation (M)	0	0	534.081	177.879	0	0	66.8277	182.245	1860.55	1931.71	61.4674	129.876	671.983	654.288	352.895	522.732	0.00:0.00:1.20:0.40:0.00:0.00:0.15:0.41:4.17:4.32:0.14:0.29:1.50:1.46:0.79:1.17	654.061	174.707	1398.63	644.306	0.91:0.24:1.95:0.90	108565	Ubiquitin carboxyl-terminal hydrolase 4 OS=Homo sapiens OX=9606 GN=USP4 PE=1 SV=3
735	TRUE	Q7L5N7|PCAT2_HUMAN	9.4	11.58	5	5		435.611	431.579	1014.27	846.148	470.556	381.562	1381.73	1890.51	5864.43	5679.34	647.334	898.455	2702.24	992.522	2158.71	2667.94	0.24:0.24:0.57:0.48:0.26:0.21:0.78:1.06:3.30:3.19:0.36:0.51:1.52:0.56:1.21:1.50	681.902	1254.07	3272.39	2130.35	0.37:0.68:1.78:1.16	60208	Lysophosphatidylcholine acyltransferase 2 OS=Homo sapiens OX=9606 GN=LPCAT2 PE=1 SV=1
813	TRUE	Q96MU7|YTDC1_HUMAN	19.73	6.46	4	4		264.759	477.496	230.207	360.477	215.599	251.476	332.257	603.159	9965.2	9090.49	1197.6	270.866	1769.09	2908.86	1567.33	2464.13	0.13:0.24:0.12:0.18:0.11:0.13:0.17:0.30:4.99:4.55:0.60:0.14:0.89:1.46:0.78:1.23	349.247	350.623	6224.23	2477.86	0.15:0.15:2.65:1.05	84700	YTH domain-containing protein 1 OS=Homo sapiens OX=9606 GN=YTHDC1 PE=1 SV=3
21	TRUE	P02751|FINC_HUMAN	49.59	35.04	76	76	Carbamidomethylation; Oxidation (M)	265953	266326	423644	417515	1303.98	3677.76	19376.4	10694.7	17979.3	16272.8	4027.01	4049.6	6300.77	4567.98	6211.01	7887.36	2.88:2.89:4.59:4.53:0.02:0.04:0.21:0.12:0.19:0.18:0.04:0.04:0.07:0.05:0.07:0.09	343359	8763.22	10582.2	6241.78	3.72:0.10:0.11:0.07	272320	Fibronectin OS=Homo sapiens OX=9606 GN=FN1 PE=1 SV=5
280	TRUE	Q9NZU0|FLRT3_HUMAN	36.79	30.2	14	14	Oxidation (M)	502.806	595.55	827.907	788.508	1860.03	743.016	722.355	603.915	19523	18022.5	3406.43	3410.11	5249.02	2720.27	2409.14	3037.85	0.12:0.15:0.21:0.20:0.46:0.18:0.18:0.15:4.85:4.48:0.85:0.85:1.30:0.68:0.60:0.75	678.693	982.329	11289.7	3434.93	0.17:0.24:2.76:0.84	73004	Leucine-rich repeat transmembrane protein FLRT3 OS=Homo sapiens OX=9606 GN=FLRT3 PE=1 SV=1
407	TRUE	Q9ULV3|CIZ1_HUMAN	26.93	12.81	8	8		164.546	85.8856	144.148	0	137.728	147.736	130.922	220.674	3620.74	3338.67	353.995	484.21	809.96	526.694	771.9	660.251	0.23:0.12:0.20:0.00:0.19:0.20:0.18:0.30:4.99:4.61:0.49:0.67:1.12:0.73:1.06:0.91	197.29	201.035	2092.88	692.201	0.25:0.25:2.63:0.87	100045	Cip1-interacting zinc finger protein OS=Homo sapiens OX=9606 GN=CIZ1 PE=1 SV=2
241	TRUE	Q86UE4|LYRIC_HUMAN	23.98	34.71	14	14	Oxidation (M)	3000.91	2428.36	3364.36	8040.56	1138.97	2876.67	627.533	1101.53	7843.06	7192	1750.68	1822.24	22233.3	4324.44	19071	14687.2	0.47:0.38:0.53:1.27:0.18:0.45:0.10:0.17:1.24:1.13:0.28:0.29:3.50:0.68:3.01:2.32	4208.55	1436.18	4651.99	15079	0.66:0.23:0.73:2.38	63837	Protein LYRIC OS=Homo sapiens OX=9606 GN=MTDH PE=1 SV=2
187	TRUE	Q15375|EPHA7_HUMAN	46.78	23.15	20	17	Oxidation (M)	1139.95	2578.34	1037.48	963.601	1464.63	1421.31	1185.33	1187.84	1851.82	2024.6	1263.67	1207.05	6792.73	4229.13	7633.72	10084.7	0.40:0.90:0.36:0.33:0.51:0.49:0.41:0.41:0.64:0.70:0.44:0.42:2.36:1.47:2.65:3.50	1429.84	1314.78	1633.43	7185.07	0.49:0.45:0.57:2.49	112097	Ephrin type-A receptor 7 OS=Homo sapiens OX=9606 GN=EPHA7 PE=1 SV=3
298	TRUE	Q15758|AAAT_HUMAN	8.26	20.7	12	12	Acetylation (N-term); Carbamidomethylation; Oxidation (M)	18166.2	22294.4	48053.8	47452.8	36561.8	38603.5	16628.8	16783	24122.1	19723	10707.6	10642.3	20797.7	14968.2	22083.8	23458.1	0.74:0.91:1.97:1.94:1.50:1.58:0.68:0.69:0.99:0.81:0.44:0.44:0.85:0.61:0.90:0.96	33991.8	27144.3	16298.7	20327	1.39:1.11:0.67:0.83	56598	Neutral amino acid transporter B(0) OS=Homo sapiens OX=9606 GN=SLC1A5 PE=1 SV=2
939	TRUE	Q10589|BST2_HUMAN	54.97	18.33	3	3		522.686	510.162	658.783	735.084	5409.91	7198.97	1885.59	2121.39	3631.74	4165.5	647.249	1381	49459	26159.9	31916.1	33296	0.05:0.05:0.06:0.07:0.51:0.68:0.18:0.20:0.34:0.39:0.06:0.13:4.66:2.47:3.01:3.14	606.679	4281.35	2534.74	35207.8	0.06:0.40:0.24:3.30	19769	Bone marrow stromal antigen 2 OS=Homo sapiens OX=9606 GN=BST2 PE=1 SV=1
575	TRUE	P27448|MARK3_HUMAN	41.88	9.03	7	5		64.7061	55.5446	246.77	283.476	240.507	387.619	249.359	272.37	1661.39	1503.74	7548.69	7481.9	1544.23	752.087	751.357	1108.58	0.04:0.04:0.16:0.19:0.16:0.26:0.17:0.18:1.10:1.00:5.00:4.96:1.02:0.50:0.50:0.73	216.832	310.306	4548.93	1039.06	0.14:0.20:2.98:0.68	84428	MAP/microtubule affinity-regulating kinase 3 OS=Homo sapiens OX=9606 GN=MARK3 PE=1 SV=5
867	TRUE	Q8NG11|TSN14_HUMAN	47.7	17.78	4	4	Carbamidomethylation	4694.45	4298.19	6118.44	5669.03	20459	24025.9	10567.5	10337.7	2086.65	2074.86	691.816	1089.08	5612.98	4080.89	7628.84	8986.23	0.63:0.58:0.83:0.77:2.76:3.25:1.43:1.40:0.28:0.28:0.09:0.15:0.76:0.55:1.03:1.21	5195.03	16347.5	1600.62	6577.23	0.70:2.20:0.22:0.89	30691	Tetraspanin-14 OS=Homo sapiens OX=9606 GN=TSPAN14 PE=1 SV=1
375	TRUE	P31939|PUR9_HUMAN	11.58	17.57	7	7	Oxidation (M)	739.651	760.672	1622.85	2158.07	1339.56	610.882	1060.13	817.839	4389.77	2805.75	1234.92	1548.68	2058.29	1302.26	1690.81	1740.1	0.46:0.47:1.00:1.33:0.83:0.38:0.66:0.51:2.71:1.73:0.76:0.96:1.27:0.81:1.05:1.08	1320.31	957.102	2494.78	1697.87	0.82:0.59:1.54:1.05	64616	Bifunctional purine biosynthesis protein ATIC OS=Homo sapiens OX=9606 GN=ATIC PE=1 SV=3
196	TRUE	Q9UM54|MYO6_HUMAN	13.24	16.92	16	16	Oxidation (M)	197.063	454.5	395.473	307.86	414.874	516.47	539.779	456.361	3984.17	4288.12	406.118	592.121	2003.47	830.043	470.631	1593.66	0.18:0.42:0.36:0.28:0.38:0.47:0.49:0.42:3.65:3.93:0.37:0.54:1.84:0.76:0.43:1.46	378.146	481.871	2317.63	1224.45	0.34:0.44:2.11:1.11	149691	Unconventional myosin-VI OS=Homo sapiens OX=9606 GN=MYO6 PE=1 SV=4
365	TRUE	Q9BZQ8|NIBA1_HUMAN	17.13	14.12	10	10	Oxidation (M)	873.354	1158.33	679.446	844.28	1793.94	2665.42	1268.51	1485.9	3220.42	4783.4	631.42	670.053	8919.35	3445.91	2465.48	6339.88	0.34:0.45:0.26:0.33:0.70:1.03:0.49:0.58:1.25:1.86:0.24:0.26:3.46:1.34:0.96:2.46	888.853	1803.45	2326.32	5292.66	0.34:0.70:0.90:2.05	103135	Protein Niban 1 OS=Homo sapiens OX=9606 GN=NIBAN1 PE=1 SV=1
880	TRUE	Q9HBI1|PARVB_HUMAN	13.89	10.99	4	3		79.1758	68.1255	119.93	144.103	0	55.1184	69.3711	0	1576.6	1315.78	105.105	226.308	305.533	119.112	343.886	465.903	0.25:0.22:0.38:0.46:0.00:0.18:0.22:0.00:5.05:4.22:0.34:0.73:0.98:0.38:1.10:1.49	152.415	62.2448	1106.6	342.204	0.37:0.15:2.66:0.82	41714	Beta-parvin OS=Homo sapiens OX=9606 GN=PARVB PE=1 SV=1
1085	TRUE	P54105|ICLN_HUMAN	29.23	18.57	3	3	Oxidation (M)	339.344	377.691	1188.18	627.379	634.12	901.301	1174.9	1201.38	11912.4	10961.1	2866.89	2085.38	1968.51	2646.47	981.834	2902.53	0.13:0.14:0.44:0.23:0.24:0.34:0.44:0.45:4.46:4.10:1.07:0.78:0.74:0.99:0.37:1.09	648.371	977.924	7056.4	2152.43	0.24:0.36:2.61:0.79	26215	Methylosome subunit pICln OS=Homo sapiens OX=9606 GN=CLNS1A PE=1 SV=1
797	TRUE	P17813|EGLN_HUMAN	13.24	9.57	5	5		1363.32	1312.31	2764.23	2611.8	1845.8	1686.93	294.327	294.987	9452.48	9423.97	1541.83	1547.58	4234.75	2201.15	2209.41	4735.64	0.46:0.44:0.93:0.88:0.62:0.57:0.10:0.10:3.18:3.17:0.52:0.52:1.43:0.74:0.74:1.59	2012.92	1213.74	5491.47	3345.24	0.67:0.40:1.82:1.11	70578	Endoglin OS=Homo sapiens OX=9606 GN=ENG PE=1 SV=2
1260	TRUE	O75712|CXB3_HUMAN	8.57	9.63	2	2		568.412	218.273	911.967	635.912	2780.93	3153.07	378.405	110.475	3031.98	3262.4	271.289	540.513	4863.23	2906.26	2454.08	3672.49	0.31:0.12:0.49:0.34:1.50:1.70:0.20:0.06:1.63:1.75:0.15:0.29:2.61:1.56:1.32:1.97	583.641	1777.22	1776.55	3474.01	0.31:0.93:0.93:1.83	30818	Gap junction beta-3 protein OS=Homo sapiens OX=9606 GN=GJB3 PE=1 SV=1
57	TRUE	Q14008|CKAP5_HUMAN	4.95	26.38	46	46	Carbamidomethylation; Oxidation (M)	3823.85	4173.53	2659.08	2857.83	4939.85	4354.13	2533.5	1754.7	6843.65	7543.35	2025.03	3669.59	5492.48	4226.83	7268.34	4366.26	0.89:0.97:0.62:0.67:1.15:1.02:0.59:0.41:1.60:1.76:0.47:0.86:1.28:0.99:1.70:1.02	3378.58	3395.54	5020.41	5338.48	0.79:0.79:1.17:1.25	225495	Cytoskeleton-associated protein 5 OS=Homo sapiens OX=9606 GN=CKAP5 PE=1 SV=3
1054	TRUE	P27986|P85A_HUMAN	19.48	5.94	3	3		365.27	269.266	432.244	454.597	732.821	1279.33	445.348	336.565	1038.75	999.092	5313.22	3270.46	778.607	8715.72	1728.09	1706.58	0.21:0.15:0.25:0.26:0.42:0.73:0.26:0.19:0.60:0.57:3.05:1.88:0.45:5.00:0.99:0.98	380.344	698.517	2874.45	3232.25	0.21:0.39:1.60:1.80	83598	Phosphatidylinositol 3-kinase regulatory subunit alpha OS=Homo sapiens OX=9606 GN=PIK3R1 PE=1 SV=2
195	TRUE	Q9HCU4|CELR2_HUMAN	33.4	8.48	16	15	Oxidation (M)	431.65	455.137	362.583	551.674	1225.08	1732.35	710.905	916.441	2359.2	2481.42	813.323	7041.85	3811.88	3260.35	16698.2	20113.8	0.11:0.12:0.09:0.14:0.31:0.44:0.18:0.23:0.60:0.63:0.21:1.79:0.97:0.83:4.24:5.11	496.544	1146.19	3173.95	10971.1	0.13:0.29:0.80:2.78	317452	Cadherin EGF LAG seven-pass G-type receptor 2 OS=Homo sapiens OX=9606 GN=CELSR2 PE=1 SV=1
501	TRUE	P52292|IMA1_HUMAN	14.15	24.95	8	8	Oxidation (M)	578.445	746.895	1060.12	1155.46	806.47	789.305	842.531	821.963	7011.02	7889.26	1007.1	1202.25	3862.67	1720.37	1062.49	2128.52	0.28:0.37:0.52:0.57:0.39:0.39:0.41:0.40:3.43:3.86:0.49:0.59:1.89:0.84:0.52:1.04	885.23	844.969	4753.44	2193.51	0.41:0.39:2.19:1.01	57862	Importin subunit alpha-1 OS=Homo sapiens OX=9606 GN=KPNA2 PE=1 SV=1
210	TRUE	Q8NI35|INADL_HUMAN	22.44	11.99	14	14		244.608	129.31	347.596	307.307	155.039	406.509	392.415	314.489	4539.28	4815.6	687.801	697.855	1760.78	366.361	948.978	866.376	0.23:0.12:0.33:0.29:0.15:0.38:0.37:0.30:4.28:4.54:0.65:0.66:1.66:0.35:0.89:0.82	300.921	333.608	2685.13	985.623	0.28:0.31:2.49:0.92	196368	InaD-like protein OS=Homo sapiens OX=9606 GN=PATJ PE=1 SV=3
870	TRUE	O15126|SCAM1_HUMAN	16.21	13.91	3	3	Oxidation (M)	687.722	498.164	1296.86	1386.21	583.702	470.775	642.92	600.447	4499.69	4889.71	1072.43	939.47	1368.2	887.313	1724.97	1872.06	0.47:0.34:0.89:0.95:0.40:0.32:0.44:0.41:3.07:3.34:0.73:0.64:0.93:0.61:1.18:1.28	967.237	574.461	2850.33	1463.14	0.66:0.39:1.95:1.00	37920	Secretory carrier-associated membrane protein 1 OS=Homo sapiens OX=9606 GN=SCAMP1 PE=1 SV=2
382	TRUE	P19022|CADH2_HUMAN	25.77	16.67	12	11	Oxidation (M)	258.419	315.697	202.436	2301.89	193.622	241.632	74.6663	206.962	5112.03	5551.38	1705.14	1774.73	454.522	2682.15	412.681	448.706	0.19:0.23:0.15:1.68:0.14:0.18:0.05:0.15:3.73:4.05:1.24:1.29:0.33:1.96:0.30:0.33	811.509	249.961	3535.82	999.514	0.58:0.18:2.53:0.71	99809	Cadherin-2 OS=Homo sapiens OX=9606 GN=CDH2 PE=1 SV=4
610	TRUE	Q9Y4D1|DAAM1_HUMAN	12.12	4.92	5	5		371.345	307.723	484.982	465.353	514.18	525.283	572.454	711.854	915.115	1131.58	317.252	383.782	1443.88	598.779	746.674	1379.31	0.55:0.45:0.71:0.69:0.76:0.77:0.84:1.05:1.35:1.67:0.47:0.56:2.13:0.88:1.10:2.03	407.351	627.056	686.933	1042.16	0.59:0.91:0.99:1.51	123473	Disheveled-associated activator of morphogenesis 1 OS=Homo sapiens OX=9606 GN=DAAM1 PE=1 SV=2
269	TRUE	Q16643|DREB_HUMAN	40.2	25.89	14	14	Carbamidomethylation; Oxidation (M)	1103.91	925.387	778.516	555.023	1031.46	783.015	741.458	647.839	57196.5	57089.8	5209.95	4553.42	15506.4	7166.65	7882.58	8471.73	0.10:0.09:0.07:0.05:0.10:0.07:0.07:0.06:5.39:5.38:0.49:0.43:1.46:0.68:0.74:0.80	840.71	800.944	31265.6	9827.88	0.08:0.07:2.93:0.92	71429	Drebrin OS=Homo sapiens OX=9606 GN=DBN1 PE=1 SV=4
828	TRUE	P36543|VATE1_HUMAN	11.79	15.49	3	3	Oxidation (M)	519.627	88.7519	306.496	371.061	714.95	1148.71	1053.41	385.931	2028.45	1492.37	275.627	518.905	1454.66	524.771	1257.82	1701.39	0.60:0.10:0.35:0.43:0.83:1.33:1.22:0.45:2.34:1.72:0.32:0.60:1.68:0.61:1.45:1.97	405.319	847.41	1078.84	1326.25	0.44:0.93:1.18:1.45	26145	V-type proton ATPase subunit E 1 OS=Homo sapiens OX=9606 GN=ATP6V1E1 PE=1 SV=1
822	TRUE	Q9H4B6|SAV1_HUMAN	12.83	11.75	3	3		0	0	553.953	155.356	0	82.4876	50.2412	64.0904	2598.4	2674.96	174.138	148.181	657.363	464.115	655.32	583.124	0.00:0.00:1.00:0.28:0.00:0.15:0.09:0.12:4.69:4.83:0.31:0.27:1.19:0.84:1.18:1.05	354.654	139.653	2120.61	692.463	0.43:0.17:2.56:0.84	44634	Protein salvador homolog 1 OS=Homo sapiens OX=9606 GN=SAV1 PE=1 SV=2
909	TRUE	Q6IAA8|LTOR1_HUMAN	15.67	32.92	4	4		411.433	577.533	421.776	380.385	348.024	377.843	205.12	853.164	756.995	1233.7	6499.86	7668.99	587.61	7148.66	817.628	878.93	0.23:0.32:0.23:0.21:0.19:0.21:0.11:0.47:0.42:0.68:3.57:4.21:0.32:3.92:0.45:0.48	497.657	501.939	4039.89	2358.21	0.27:0.27:2.18:1.28	17745	Ragulator complex protein LAMTOR1 OS=Homo sapiens OX=9606 GN=LAMTOR1 PE=1 SV=2
489	TRUE	O75882|ATRN_HUMAN	31.24	10.22	9	9	Oxidation (M)	104.838	77.669	141.125	69.2488	170.255	251.396	60.0401	0	4277.86	4086.67	914.629	472.558	1146.77	358.657	405.25	472.711	0.13:0.10:0.17:0.09:0.21:0.31:0.07:0.00:5.26:5.03:1.12:0.58:1.41:0.44:0.50:0.58	137.784	265.449	2437.93	755.439	0.15:0.30:2.71:0.84	158537	Attractin OS=Homo sapiens OX=9606 GN=ATRN PE=1 SV=2
633	TRUE	P30511|HLAF_HUMAN	33.59	26.01	6	6		547.864	417.584	761.149	2491.55	1094.03	1437.13	725.92	1802.42	1325.08	1011.93	1338.67	443.353	6909.15	4516.21	7682.44	6438.21	0.23:0.17:0.31:1.02:0.45:0.59:0.30:0.74:0.54:0.42:0.55:0.18:2.84:1.86:3.16:2.65	1295.86	1264.88	1234.23	6386.5	0.51:0.50:0.48:2.51	39062	HLA class I histocompatibility antigen, alpha chain F OS=Homo sapiens OX=9606 GN=HLA-F PE=1 SV=3
209	TRUE	Q9Y6N7|ROBO1_HUMAN	68.27	16.54	19	19	Oxidation (M)	146.553	164.548	279.205	182.713	155.474	194.459	184.616	233.633	8073.23	7221.64	2935.65	2779.45	584.596	227.76	421.044	497.435	0.10:0.11:0.18:0.12:0.10:0.13:0.12:0.15:5.32:4.76:1.93:1.83:0.39:0.15:0.28:0.33	271.166	220.529	5252.49	432.709	0.18:0.14:3.40:0.28	180930	Roundabout homolog 1 OS=Homo sapiens OX=9606 GN=ROBO1 PE=1 SV=1
430	TRUE	Q6ZNJ1|NBEL2_HUMAN	28.08	4.5	8	8	Carbamidomethylation; Oxidation (M)	0	68.9969	0	0	0	58.6396	0	0	2537.66	2325.59	58.845	71.434	964.149	196.981	417.525	329.49	0.00:0.16:0.00:0.00:0.00:0.13:0.00:0.00:5.78:5.29:0.13:0.16:2.19:0.45:0.95:0.75	68.9969	58.6396	2331.38	627.949	0.09:0.08:3.02:0.81	302517	Neurobeachin-like protein 2 OS=Homo sapiens OX=9606 GN=NBEAL2 PE=1 SV=2
1072	TRUE	Q9Y508|RN114_HUMAN	40.03	9.65	2	2	Carbamidomethylation	0	0	60.8133	59.1458	0	0	146.918	145.624	1015.18	966.294	0	0	388.528	282.879	234.824	181.293	0.00:0.00:0.28:0.27:0.00:0.00:0.68:0.67:4.67:4.44:0.00:0.00:1.79:1.30:1.08:0.83	59.9796	146.271	990.736	271.881	0.16:0.40:2.70:0.74	25694	E3 ubiquitin-protein ligase RNF114 OS=Homo sapiens OX=9606 GN=RNF114 PE=1 SV=1
1017	TRUE	O75096|LRP4_HUMAN	35.43	2.31	3	3		0	0	0	0	0	0	0	89.0641	1037.41	631.957	0	0	253.93	53.8965	96.7233	501.547	0.00:0.00:0.00:0.00:0.00:0.00:0.00:0.53:6.23:3.79:0.00:0.00:1.52:0.32:0.58:3.01	0	89.0641	834.684	302.032	0.00:0.29:2.72:0.99	212045	Low-density lipoprotein receptor-related protein 4 OS=Homo sapiens OX=9606 GN=LRP4 PE=1 SV=4
165	TRUE	P07996|TSP1_HUMAN	37.02	20.6	21	21	Oxidation (M)	10624.5	10836.2	30254.6	27645.4	2782.7	3645.31	1630.54	1485.27	71460.4	75682.9	13920.2	13618.3	28371.9	19427.8	22031.9	20191	0.48:0.49:1.37:1.25:0.13:0.16:0.07:0.07:3.23:3.42:0.63:0.62:1.28:0.88:1.00:0.91	19840.2	2385.95	43670.4	22505.6	0.90:0.11:1.98:1.02	129383	Thrombospondin-1 OS=Homo sapiens OX=9606 GN=THBS1 PE=1 SV=2
858	TRUE	P50552|VASP_HUMAN	4.86	12.89	4	4	Oxidation (M)	209.424	265.464	312.65	367.83	325.672	321.471	398.31	413.385	1608.1	1794.23	120.134	223.09	1104.27	550.577	637.931	649.25	0.36:0.46:0.54:0.63:0.56:0.55:0.69:0.71:2.77:3.09:0.21:0.38:1.90:0.95:1.10:1.12	288.842	364.709	1184.26	759.19	0.44:0.56:1.82:1.17	39830	Vasodilator-stimulated phosphoprotein OS=Homo sapiens OX=9606 GN=VASP PE=1 SV=3
603	TRUE	Q6N022|TEN4_HUMAN	14.91	2.82	7	6	Oxidation (M)	369.907	242.121	731.276	751.001	398.942	634.8	452.255	447.978	4202.37	3855.59	992.825	512.924	864.091	994.844	754.639	1546.98	0.33:0.22:0.66:0.68:0.36:0.57:0.41:0.40:3.79:3.47:0.89:0.46:0.78:0.90:0.68:1.39	603.294	525.277	2668.49	1040.14	0.50:0.43:2.21:0.86	307957	Teneurin-4 OS=Homo sapiens OX=9606 GN=TENM4 PE=1 SV=2
370	TRUE	Q93100|KPBB_HUMAN	15.66	10.8	10	10		261.742	759.146	559.299	613.548	591.481	548.28	362.783	67.0409	4220.4	3972.2	942.058	670.681	989.118	816.432	1245.35	760.168	0.24:0.70:0.51:0.56:0.54:0.50:0.33:0.06:3.89:3.66:0.87:0.62:0.91:0.75:1.15:0.70	638.575	546.949	2451.33	952.766	0.56:0.48:2.14:0.83	124884	Phosphorylase b kinase regulatory subunit beta OS=Homo sapiens OX=9606 GN=PHKB PE=1 SV=3
1049	TRUE	Q9UQ49|NEUR3_HUMAN	5.24	12.62	3	3		81.5536	204.955	306.396	284.035	330.322	432.066	350.558	326.826	1505.83	1310.63	107.897	109.357	883.913	328.538	753.544	769.881	0.16:0.41:0.61:0.56:0.65:0.85:0.69:0.65:2.98:2.59:0.21:0.22:1.75:0.65:1.49:1.52	259.386	359.943	1107.44	712.626	0.43:0.59:1.82:1.17	48252	Sialidase-3 OS=Homo sapiens OX=9606 GN=NEU3 PE=1 SV=1
339	TRUE	Q13033|STRN3_HUMAN	19.74	20.95	11	11	Carbamidomethylation	290.077	396.293	404.341	469.48	272.343	476.453	422.907	354.666	7019.47	6950.74	480.979	979.933	1622.38	1795.37	1517.63	687.262	0.19:0.26:0.27:0.31:0.18:0.32:0.28:0.24:4.65:4.61:0.32:0.65:1.08:1.19:1.01:0.46	390.048	416.44	4358.63	1460.36	0.24:0.25:2.63:0.88	87209	Striatin-3 OS=Homo sapiens OX=9606 GN=STRN3 PE=1 SV=3
989	TRUE	Q9UN37|VPS4A_HUMAN	65.66	10.53	3	3		0	0	0	0	0	0	0	0	1956.43	1483.09	91.3195	91.0448	278.507	141.368	179.047	518.547	0.00:0.00:0.00:0.00:0.00:0.00:0.00:0.00:6.60:5.01:0.31:0.31:0.94:0.48:0.60:1.75	0	0	1160.4	539.347	0.00:0.00:2.73:1.27	48898	Vacuolar protein sorting-associated protein 4A OS=Homo sapiens OX=9606 GN=VPS4A PE=1 SV=1
204	TRUE	O60292|SI1L3_HUMAN	45.25	10.61	15	15	Oxidation (M)	51.5504	75.7639	64.1633	52.4287	134.029	0	71.1165	57.6236	6054.41	5625.82	822.347	756.497	915.8	435.057	814.21	656.064	0.05:0.07:0.06:0.05:0.13:0.00:0.07:0.06:5.84:5.43:0.79:0.73:0.88:0.42:0.79:0.63	116.255	125.505	3314.77	705.283	0.11:0.12:3.11:0.66	194610	Signal-induced proliferation-associated 1-like protein 3 OS=Homo sapiens OX=9606 GN=SIPA1L3 PE=1 SV=3
584	TRUE	P62873|GBB1_HUMAN	15.7	18.53	7	4	Acetylation (N-term); Carbamidomethylation	2965.93	3153.48	4359.21	4957.11	11301.1	8074.52	3736.72	4258.09	3148.44	3131.2	1774.62	1725.31	2605.47	2576.33	5666.47	2605.09	0.72:0.76:1.06:1.20:2.74:1.96:0.91:1.03:0.76:0.76:0.43:0.42:0.63:0.62:1.37:0.63	3858.93	6842.62	2444.89	3363.34	0.93:1.66:0.59:0.81	37377	Guanine nucleotide-binding protein G(I)/G(S)/G(T) subunit beta-1 OS=Homo sapiens OX=9606 GN=GNB1 PE=1 SV=3
485	TRUE	Q8NBS3|S4A11_HUMAN	24.28	12.57	8	8	Oxidation (M)	249.088	328.885	502.963	547.906	278.219	387.17	593.861	572.531	10961.4	9461.76	871.518	1086.91	1516.33	1813.43	1377.81	2903.08	0.12:0.16:0.24:0.26:0.13:0.19:0.28:0.27:5.24:4.53:0.42:0.52:0.73:0.87:0.66:1.39	460.67	547.718	5595.4	1902.66	0.22:0.26:2.63:0.89	99581	Sodium bicarbonate transporter-like protein 11 OS=Homo sapiens OX=9606 GN=SLC4A11 PE=1 SV=2
554	TRUE	Q9Y6G9|DC1L1_HUMAN	16.38	18.74	7	7		346.521	373.26	451.682	614.189	328.477	360.228	1159.31	1077.64	10399.3	10418.3	972.813	1369.05	6245.86	730.619	1504.53	967.64	0.15:0.16:0.19:0.26:0.14:0.15:0.50:0.46:4.46:4.47:0.42:0.59:2.68:0.31:0.65:0.41	572.008	786.487	6332.95	2438.67	0.23:0.31:2.50:0.96	56579	Cytoplasmic dynein 1 light intermediate chain 1 OS=Homo sapiens OX=9606 GN=DYNC1LI1 PE=1 SV=3
383	TRUE	P15531|NDKA_HUMAN	12.67	47.37	9	9	Oxidation (M)	1117.27	1393.33	1009.12	1101.75	2378.37	2960.11	5252.08	4478.52	26122.4	23749.6	1369.69	1497.02	14098.1	5615.84	4466.88	6316.09	0.17:0.22:0.16:0.17:0.37:0.46:0.82:0.70:4.06:3.69:0.21:0.23:2.19:0.87:0.69:0.98	1155.37	3767.27	13184.7	7624.22	0.18:0.59:2.05:1.19	17149	Nucleoside diphosphate kinase A OS=Homo sapiens OX=9606 GN=NME1 PE=1 SV=1
804	TRUE	P30626|SORCN_HUMAN	8.46	27.27	5	5	Oxidation (M)	746.058	617.407	955.807	1067.04	985.287	709.092	799.027	744.395	4546.4	4344.04	640.56	881.319	2195.55	1006.59	1575.88	1376.46	0.51:0.43:0.66:0.74:0.68:0.49:0.55:0.51:3.14:3.00:0.44:0.61:1.51:0.69:1.09:0.95	846.577	809.451	3040.73	1538.62	0.54:0.52:1.95:0.99	21676	Sorcin OS=Homo sapiens OX=9606 GN=SRI PE=1 SV=1
244	TRUE	Q12959|DLG1_HUMAN	9.44	25.22	16	16	Carbamidomethylation	1196.21	380.218	1324.53	1276.73	1988.02	2243.32	1555.87	1379.72	4337.55	2729.48	852.196	711.651	3248.12	1612.41	2926.59	4357.15	0.60:0.19:0.66:0.64:0.99:1.12:0.78:0.69:2.16:1.36:0.42:0.35:1.62:0.80:1.46:2.17	1084.62	1791.73	2157.72	3036.07	0.54:0.89:1.07:1.50	100455	Disks large homolog 1 OS=Homo sapiens OX=9606 GN=DLG1 PE=1 SV=2
751	TRUE	P41743|KPCI_HUMAN	17.78	9.9	4	4		55.2058	100.679	55.4233	190.714	88.8279	131.501	176.131	150.317	1578.49	840.976	190.363	182.08	251.349	176.411	399.33	458.603	0.18:0.32:0.18:0.61:0.28:0.42:0.56:0.48:5.02:2.68:0.61:0.58:0.80:0.56:1.27:1.46	100.506	136.694	1039.7	428.564	0.24:0.32:2.44:1.01	68262	Protein kinase C iota type OS=Homo sapiens OX=9606 GN=PRKCI PE=1 SV=2
545	TRUE	Q5VWQ8|DAB2P_HUMAN	8.59	8.92	7	7	Oxidation (M)	630.352	674.88	950.928	949.246	644.143	599.212	1036.33	838.063	1204.34	1583.52	480.003	769.428	1887.08	592.042	2361.77	2358.78	0.57:0.61:0.87:0.86:0.59:0.55:0.94:0.76:1.10:1.44:0.44:0.70:1.72:0.54:2.15:2.15	831.271	779.436	1009.32	1799.92	0.75:0.71:0.91:1.63	131625	Disabled homolog 2-interacting protein OS=Homo sapiens OX=9606 GN=DAB2IP PE=1 SV=2
70	TRUE	Q02952|AKA12_HUMAN	18.4	28.68	36	36	Oxidation (M)	493.77	509.822	671.017	679.925	929.135	797.061	1426.44	1106.2	15604.6	14998.1	893.466	1260.09	3597.36	3040.47	2742.44	3115.4	0.15:0.16:0.21:0.21:0.29:0.25:0.44:0.34:4.81:4.63:0.28:0.39:1.11:0.94:0.85:0.96	588.634	1064.71	8189.06	3123.92	0.18:0.33:2.53:0.96	191482	A-kinase anchor protein 12 OS=Homo sapiens OX=9606 GN=AKAP12 PE=1 SV=4
898	TRUE	O00273|DFFA_HUMAN	18.66	16.92	4	4		202.869	217.905	311.344	292.039	240.601	319.015	98.0465	436.929	3341.46	2822.41	448.999	446.741	828.53	621.601	532.81	583.402	0.28:0.30:0.42:0.40:0.33:0.43:0.13:0.60:4.55:3.85:0.61:0.61:1.13:0.85:0.73:0.79	256.039	273.648	2394.36	673.119	0.28:0.30:2.66:0.75	36522	DNA fragmentation factor subunit alpha OS=Homo sapiens OX=9606 GN=DFFA PE=1 SV=1
856	TRUE	Q9NR28|DBLOH_HUMAN	10.33	16.74	4	4	Oxidation (M)	0	156.903	168.911	85.8936	169.383	217.789	1069.67	1861.52	3653.2	4189.86	192.366	258.563	1964.18	728.531	1272.26	1344.61	0.00:0.14:0.16:0.08:0.16:0.20:0.99:1.72:3.37:3.87:0.18:0.24:1.81:0.67:1.17:1.24	164.558	845.311	2739.15	1492.25	0.13:0.65:2.09:1.14	27131	Diablo homolog, mitochondrial OS=Homo sapiens OX=9606 GN=DIABLO PE=1 SV=1
327	TRUE	Q13425|SNTB2_HUMAN	28.6	27.22	13	13	Carbamidomethylation; Oxidation (M)	364.212	276.174	668.934	1867.52	561.185	604.136	578.486	551.356	159193	6452.63	1527.16	3764.2	113041	5174.03	46376.3	43592.1	0.02:0.02:0.03:0.08:0.02:0.03:0.02:0.02:6.62:0.27:0.06:0.16:4.70:0.22:1.93:1.81	794.21	573.79	42734.2	52045.8	0.03:0.02:1.78:2.17	57950	Beta-2-syntrophin OS=Homo sapiens OX=9606 GN=SNTB2 PE=1 SV=1
1156	TRUE	O60906|NSMA_HUMAN	65.61	6.38	2	2		0	0	0	0	0	0	0	0	2280.34	2608.25	117.981	113.791	494.139	144.145	218.628	514.262	0.00:0.00:0.00:0.00:0.00:0.00:0.00:0.00:5.62:6.43:0.29:0.28:1.22:0.36:0.54:1.27	0	0	1665.75	440.211	0.00:0.00:3.16:0.84	47646	Sphingomyelin phosphodiesterase 2 OS=Homo sapiens OX=9606 GN=SMPD2 PE=1 SV=2
212	TRUE	Q6UVK1|CSPG4_HUMAN	61.46	5.99	9	9	Oxidation (M)	286.33	280.968	499.857	439.745	373.091	275.966	267.369	375.795	2848.03	2812.14	1576.15	1389.41	285.096	262.751	286.582	384.818	0.36:0.36:0.63:0.56:0.47:0.35:0.34:0.48:3.60:3.56:1.99:1.76:0.36:0.33:0.36:0.49	417.588	349.578	2156.43	304.812	0.52:0.43:2.67:0.38	250537	Chondroitin sulfate proteoglycan 4 OS=Homo sapiens OX=9606 GN=CSPG4 PE=1 SV=2
265	TRUE	P07476|INVO_HUMAN	32.6	24.1	11	11		75.3237	94.6546	358.386	0	196.9	1657.32	1709.34	2102.79	0	75.5328	0	0	108.695	101.401	229.296	100.319	0.18:0.22:0.84:0.00:0.46:3.89:4.02:4.94:0.00:0.18:0.00:0.00:0.26:0.24:0.54:0.24	228.434	1933.33	75.5328	249.033	0.37:3.11:0.12:0.40	68479	Involucrin OS=Homo sapiens OX=9606 GN=IVL PE=1 SV=2
583	TRUE	Q9NZW5|MPP6_HUMAN	11.22	20.37	8	8		333.026	253.748	449.757	536.903	532.673	634.533	1326.92	1941.54	4007.79	4091.96	523.027	648.262	2539.16	533.526	1687.64	1514.51	0.25:0.19:0.33:0.40:0.40:0.47:0.98:1.44:2.97:3.04:0.39:0.48:1.88:0.40:1.25:1.12	432.53	1200.36	2317.76	1608.92	0.31:0.86:1.67:1.16	61117	MAGUK p55 subfamily member 6 OS=Homo sapiens OX=9606 GN=MPP6 PE=1 SV=2
841	TRUE	O00592|PODXL_HUMAN	30.98	8.06	3	3		459.768	69.5634	493.221	1020.97	126.32	141.927	0	114.93	20125.2	20320.9	2232.02	1826.23	3782.01	2561.85	1128.98	2641.99	0.13:0.02:0.14:0.29:0.04:0.04:0.00:0.03:5.64:5.70:0.63:0.51:1.06:0.72:0.32:0.74	600.499	163.371	11126.1	2528.71	0.17:0.05:3.09:0.70	58635	Podocalyxin OS=Homo sapiens OX=9606 GN=PODXL PE=1 SV=2
827	TRUE	P61586|RHOA_HUMAN	6.71	11.4	3	2	Carbamidomethylation; Oxidation (M)	501.548	721.25	3154.69	2894.28	1106.74	1859.02	435.444	393.707	5872.73	5334.57	1595.44	1095.04	9176.91	5369.28	950.444	1152.87	0.19:0.28:1.21:1.11:0.43:0.71:0.17:0.15:2.26:2.05:0.61:0.42:3.53:2.06:0.37:0.44	1817.94	948.728	3677.62	4280.01	0.68:0.35:1.37:1.60	21768	Transforming protein RhoA OS=Homo sapiens OX=9606 GN=RHOA PE=1 SV=1
902	TRUE	Q9BZR6|RTN4R_HUMAN	20.07	6.55	3	3		426.052	383.509	682.646	304.854	410.059	493.439	996.628	2113.63	4721.3	6123.23	1354.89	1331.9	2073.93	1041.6	636.939	1125.03	0.28:0.25:0.45:0.20:0.27:0.33:0.66:1.40:3.12:4.05:0.90:0.88:1.37:0.69:0.42:0.74	449.266	1003.44	3449.96	1309.57	0.29:0.65:2.22:0.84	50708	Reticulon-4 receptor OS=Homo sapiens OX=9606 GN=RTN4R PE=1 SV=1
574	TRUE	Q8IWU5|SULF2_HUMAN	33.14	8.97	6	6	Oxidation (M)	598.917	264.127	507.669	602.251	584.758	473.804	1202.58	926.121	1125.7	1348.16	858.545	867.053	7279.43	2430.34	1636.9	2799.82	0.41:0.18:0.35:0.41:0.40:0.32:0.82:0.63:0.77:0.92:0.58:0.59:4.95:1.65:1.11:1.91	493.241	796.815	1139.48	3672.35	0.32:0.52:0.75:2.41	100455	Extracellular sulfatase Sulf-2 OS=Homo sapiens OX=9606 GN=SULF2 PE=1 SV=1
566	TRUE	Q9UL25|RAB21_HUMAN	7.31	36.44	7	6	Carbamidomethylation	910.028	921.111	6602.51	574.687	1010.14	1001.05	658.55	1351.18	7439.11	7176.11	1132.46	751.051	4718.31	1756.23	4141.14	4387.77	0.33:0.33:2.37:0.21:0.36:0.36:0.24:0.49:2.67:2.58:0.41:0.27:1.70:0.63:1.49:1.58	2252.08	1005.23	4124.68	3750.86	0.81:0.36:1.48:1.35	24348	Ras-related protein Rab-21 OS=Homo sapiens OX=9606 GN=RAB21 PE=1 SV=3
257	TRUE	P23470|PTPRG_HUMAN	40.5	14.46	15	15		538.69	759.309	956.497	966.632	445.428	668.915	422.009	460.342	11396.4	11626.9	3575.4	3685.19	1446.35	226.474	864.844	857.958	0.22:0.31:0.39:0.40:0.18:0.28:0.17:0.19:4.69:4.78:1.47:1.52:0.59:0.09:0.36:0.35	805.282	499.173	7570.98	913.459	0.33:0.20:3.09:0.37	162003	Receptor-type tyrosine-protein phosphatase gamma OS=Homo sapiens OX=9606 GN=PTPRG PE=1 SV=4
861	TRUE	Q9Y5L3|ENTP2_HUMAN	4.88	9.49	3	3	Oxidation (M)	442.358	243.887	746.017	902.854	837.204	1416.34	945.156	575.99	13099.6	12580.9	409.119	363.954	4418.84	341.438	3051.43	3694.14	0.16:0.09:0.27:0.33:0.30:0.51:0.34:0.21:4.76:4.57:0.15:0.13:1.60:0.12:1.11:1.34	669.755	996.874	12159.6	2966.39	0.16:0.24:2.90:0.71	53665	Ectonucleoside triphosphate diphosphohydrolase 2 OS=Homo sapiens OX=9606 GN=ENTPD2 PE=1 SV=1
946	TRUE	Q12913|PTPRJ_HUMAN	73.78	1.94	2	2		0	0	0	0	0	0	0	0	587.121	648.053	0	213.608	3575.33	1658.06	217.983	316.146	0.00:0.00:0.00:0.00:0.00:0.00:0.00:0.00:1.30:1.44:0.00:0.47:7.93:3.68:0.48:0.70	0	0	535.953	1555.31	0.00:0.00:1.03:2.97	145941	Receptor-type tyrosine-protein phosphatase eta OS=Homo sapiens OX=9606 GN=PTPRJ PE=1 SV=3
7	TRUE	P35579|MYH9_HUMAN	37.07	47.24	99	89	Carbamidomethylation; Oxidation (M)	965.662	1308.54	1646.49	1347.77	2315.71	1427.37	8443.63	8372.44	120565	113825	14766.7	15477.6	16904.9	10796.4	10509.9	12890.3	0.05:0.06:0.08:0.06:0.11:0.07:0.40:0.39:5.65:5.33:0.69:0.73:0.79:0.51:0.49:0.60	1317.12	5139.79	66158.6	12775.4	0.06:0.24:3.10:0.60	226532	Myosin-9 OS=Homo sapiens OX=9606 GN=MYH9 PE=1 SV=4
81	TRUE	P07355|ANXA2_HUMAN	6.26	64.01	32	32	Acetylation (N-term); Carbamidomethylation; Oxidation (M)	54223.2	53420.5	101404	99828.1	99254.3	105753	116389	112713	228076	228029	62725.5	63064.1	192871	112436	125549	141539	0.46:0.45:0.86:0.84:0.84:0.89:0.98:0.95:1.92:1.92:0.53:0.53:1.63:0.95:1.06:1.19	77218.9	108527	145474	143099	0.65:0.92:1.23:1.21	38604	Annexin A2 OS=Homo sapiens OX=9606 GN=ANXA2 PE=1 SV=2
852	TRUE	Q9UL26|RB22A_HUMAN	8.83	29.9	5	4	Oxidation (M)	470.916	276.086	289.916	419.552	661.178	561.579	622.889	808.325	981.92	1355.16	439.294	342.545	780.247	332.545	1586.23	1555.72	0.66:0.38:0.40:0.58:0.92:0.78:0.87:1.13:1.37:1.89:0.61:0.48:1.09:0.46:2.21:2.17	364.117	663.492	830.365	1063.69	0.50:0.91:1.14:1.46	21855	Ras-related protein Rab-22A OS=Homo sapiens OX=9606 GN=RAB22A PE=1 SV=2
648	TRUE	O43570|CAH12_HUMAN	20.33	19.21	5	5	Oxidation (M)	1154.65	1252.18	5083.07	5371.7	413.226	545.874	2456.23	1825.99	13962.5	14277.7	5287.71	6202.1	3361.23	882.771	2473.83	3289.39	0.27:0.30:1.20:1.27:0.10:0.13:0.58:0.43:3.29:3.37:1.25:1.46:0.79:0.21:0.58:0.78	3215.4	1424.07	9932.5	2650.97	0.75:0.33:2.31:0.62	39451	Carbonic anhydrase 12 OS=Homo sapiens OX=9606 GN=CA12 PE=1 SV=1
306	TRUE	Q9NZN4|EHD2_HUMAN	10.04	18.78	11	8	Oxidation (M)	686.081	473.813	1522.34	1654.02	2120.99	2608.89	1324.15	1395.24	1202.06	979.713	3127.82	2782.86	2554.93	1447.29	2661.41	3969.12	0.36:0.25:0.80:0.87:1.11:1.37:0.69:0.73:0.63:0.51:1.64:1.46:1.34:0.76:1.40:2.08	1189.18	1862.32	2023.11	2818.44	0.60:0.94:1.03:1.43	61161	EH domain-containing protein 2 OS=Homo sapiens OX=9606 GN=EHD2 PE=1 SV=2
770	TRUE	P05121|PAI1_HUMAN	13	12.94	4	4	Oxidation (M)	1037.86	739.814	703.446	852.014	413.08	310.42	330.785	326.591	1502.99	13824.9	477.272	1051.5	7892.12	1220.76	7377.14	659.605	0.43:0.31:0.29:0.35:0.17:0.13:0.14:0.13:0.62:5.71:0.20:0.43:3.26:0.50:3.05:0.27	833.282	345.219	4538.84	4287.41	0.33:0.14:1.81:1.71	45060	Plasminogen activator inhibitor 1 OS=Homo sapiens OX=9606 GN=SERPINE1 PE=1 SV=1
707	TRUE	O00161|SNP23_HUMAN	11.26	24.17	4	4	Oxidation (M)	744.287	634.962	1655.45	1598.34	1680.55	1964.66	1219.21	846.509	2060.41	1937.79	1017.96	652.301	3024.24	1798.12	2306.58	3204.24	0.45:0.39:1.01:0.97:1.02:1.19:0.74:0.51:1.25:1.18:0.62:0.40:1.84:1.09:1.40:1.95	1158.26	1427.73	1417.12	2583.3	0.70:0.87:0.86:1.57	23354	Synaptosomal-associated protein 23 OS=Homo sapiens OX=9606 GN=SNAP23 PE=1 SV=1
337	TRUE	P06396|GELS_HUMAN	21.9	22.51	11	11	Carbamidomethylation; Oxidation (M)	747.689	705.702	1100.15	792.238	1926.67	2765.93	9598.25	9028.61	11798.6	13984.8	1631.5	1841.93	12145.2	5525.31	5374.39	7448.58	0.14:0.13:0.20:0.15:0.36:0.51:1.78:1.67:2.18:2.59:0.30:0.34:2.25:1.02:1.00:1.38	836.446	5829.86	7314.2	7623.36	0.15:1.08:1.35:1.41	85698	Gelsolin OS=Homo sapiens OX=9606 GN=GSN PE=1 SV=1
860	TRUE	Q9NNW5|WDR6_HUMAN	109.4	6.16	4	4	Carbamidomethylation	0	0	0	0	0	0	0	0	1793.09	1465.71	0	0	204.945	0	253.186	466.404	0.00:0.00:0.00:0.00:0.00:0.00:0.00:0.00:6.86:5.61:0.00:0.00:0.78:0.00:0.97:1.78	0	0	1629.4	308.178	0.00:0.00:3.36:0.64	121725	WD repeat-containing protein 6 OS=Homo sapiens OX=9606 GN=WDR6 PE=1 SV=1
342	TRUE	P63096|GNAI1_HUMAN	7.89	13.56	9	3		532.931	1841.24	2457.48	2753.76	3303.43	5205.59	1307.33	1563.65	905.879	681.653	878.821	917.485	2101.89	500.205	1724.73	2292.84	0.29:1.02:1.36:1.52:1.82:2.88:0.72:0.86:0.50:0.38:0.49:0.51:1.16:0.28:0.95:1.27	1938.1	2845	845.959	1682.84	1.06:1.56:0.46:0.92	40361	Guanine nucleotide-binding protein G(i) subunit alpha-1 OS=Homo sapiens OX=9606 GN=GNAI1 PE=1 SV=2
894	TRUE	P30825|SL7A1_HUMAN	3.02	6.36	4	3	Carbamidomethylation; Oxidation (M)	2818.3	802.144	1608.28	1668.8	1936.8	2206.85	1056.92	1316.04	5499.49	5647.45	1030.1	1272.33	2733.8	1185.17	3340.55	4078.43	1.18:0.34:0.67:0.70:0.81:0.92:0.44:0.55:2.30:2.37:0.43:0.53:1.15:0.50:1.40:1.71	1724.38	1629.15	3457.86	2977	0.70:0.67:1.41:1.22	67638	High affinity cationic amino acid transporter 1 OS=Homo sapiens OX=9606 GN=SLC7A1 PE=1 SV=1
37	TRUE	P08727|K1C19_HUMAN	19.65	82.75	49	46	Oxidation (M)	12076.4	11745.5	25331.3	21117	9425.21	9835.23	396243	361774	169614	163034	77883.2	79796.1	388008	319983	500276	433739	0.06:0.06:0.14:0.11:0.05:0.05:2.13:1.94:0.91:0.88:0.42:0.43:2.08:1.72:2.69:2.33	17567.5	194319	122582	410502	0.09:1.04:0.66:2.20	44106	Keratin, type I cytoskeletal 19 OS=Homo sapiens OX=9606 GN=KRT19 PE=1 SV=4
441	TRUE	Q9H5Y7|SLIK6_HUMAN	33.86	14.74	8	8	Oxidation (M)	138.004	145.247	353.695	366.21	105.124	119.499	312.329	417.849	7497.68	7110.44	1149.97	1228.39	776.684	597.86	664.804	625.153	0.10:0.11:0.26:0.27:0.08:0.09:0.23:0.31:5.55:5.26:0.85:0.91:0.58:0.44:0.49:0.46	296.583	281.822	4246.62	729.029	0.21:0.20:3.06:0.53	95110	SLIT and NTRK-like protein 6 OS=Homo sapiens OX=9606 GN=SLITRK6 PE=2 SV=3
391	TRUE	P54578|UBP14_HUMAN	8.44	30.77	11	11	Oxidation (M)	571.476	618.646	1097.15	1041.28	766.533	911.948	1205.86	961.376	9274.65	9714.41	763.056	716.029	3335.19	1336.81	2126.32	1769.65	0.25:0.27:0.48:0.46:0.34:0.40:0.53:0.42:4.10:4.29:0.34:0.32:1.47:0.59:0.94:0.78	832.137	961.429	5117.03	2141.99	0.37:0.42:2.26:0.95	56069	Ubiquitin carboxyl-terminal hydrolase 14 OS=Homo sapiens OX=9606 GN=USP14 PE=1 SV=3
299	TRUE	Q9NQX3|GEPH_HUMAN	20.35	22.55	11	11	Acetylation (N-term); Carbamidomethylation; Oxidation (M)	72.9502	121.149	267.221	315.757	193.007	302.139	425.639	354.556	4437.21	4079.18	384.505	602.689	920.681	556.611	579.22	516.449	0.08:0.14:0.30:0.36:0.22:0.34:0.48:0.40:5.02:4.62:0.44:0.68:1.04:0.63:0.66:0.58	292.229	318.835	2375.9	643.24	0.32:0.35:2.62:0.71	79748	Gephyrin OS=Homo sapiens OX=9606 GN=GPHN PE=1 SV=1
1016	TRUE	P14174|MIF_HUMAN	20.78	17.39	2	2	Carbamidomethylation; Oxidation (M)	77.7227	209.53	79.3891	77.2743	98.9886	88.4214	344.606	468.697	5061.81	7183.17	373.779	389.159	752.888	1978.36	540.309	450.965	0.07:0.18:0.07:0.07:0.09:0.08:0.30:0.41:4.46:6.32:0.33:0.34:0.66:1.74:0.48:0.40	174.146	500.357	3251.98	1029.65	0.14:0.40:2.62:0.83	12476	Macrophage migration inhibitory factor OS=Homo sapiens OX=9606 GN=MIF PE=1 SV=4
45	TRUE	P15144|AMPN_HUMAN	83.91	42.5	47	47	Carbamidomethylation; Oxidation (M)	8228.72	9996.44	22537	22563.6	2658.02	3007.16	2889.71	2805.43	184621	180953	86896.3	87138.8	1522.63	815.932	1379.01	1621.66	0.21:0.26:0.58:0.58:0.07:0.08:0.07:0.07:4.77:4.67:2.24:2.25:0.04:0.02:0.04:0.04	15831.4	2861.78	134902	1334.81	0.41:0.07:3.48:0.03	109540	Aminopeptidase N OS=Homo sapiens OX=9606 GN=ANPEP PE=1 SV=4
974	TRUE	Q99985|SEM3C_HUMAN	58.38	5.46	3	3	Oxidation (M)	0	0	35.7488	0	0	0	0	0	610.299	662.611	3735.44	357.705	587.9	152.378	477.612	318.959	0.00:0.00:0.08:0.00:0.00:0.00:0.00:0.00:1.41:1.53:8.61:0.82:1.36:0.35:1.10:0.74	35.7488	0	1468.24	418.57	0.07:0.00:3.05:0.87	85207	Semaphorin-3C OS=Homo sapiens OX=9606 GN=SEMA3C PE=2 SV=2
840	TRUE	P11279|LAMP1_HUMAN	15.8	8.15	4	4		3512.01	3618.02	6879.77	6177.57	4633.93	2566.21	4467.01	5480.82	5054.81	5450.55	4026.12	4959.37	9161.15	5237.16	12116.2	9201.45	0.61:0.63:1.19:1.07:0.80:0.44:0.77:0.95:0.87:0.94:0.70:0.86:1.58:0.91:2.09:1.59	5046.84	4286.99	4872.71	8929	0.87:0.74:0.84:1.54	44882	Lysosome-associated membrane glycoprotein 1 OS=Homo sapiens OX=9606 GN=LAMP1 PE=1 SV=3
478	TRUE	Q8TD43|TRPM4_HUMAN	13.92	5.77	6	6	Oxidation (M)	845.604	828.24	2369.02	1747.7	509.099	704.408	694.349	613.157	4518.06	2664.14	952.354	920.469	1619	1191.58	2067.55	1835.61	0.56:0.55:1.57:1.16:0.34:0.47:0.46:0.41:3.00:1.77:0.63:0.61:1.08:0.79:1.37:1.22	1447.64	666.885	2263.76	1678.44	0.96:0.44:1.50:1.11	134301	Transient receptor potential cation channel subfamily M member 4 OS=Homo sapiens OX=9606 GN=TRPM4 PE=1 SV=1
618	TRUE	O75976|CBPD_HUMAN	38.88	3.91	5	5		267.948	273.923	337.891	620.786	406.446	506.898	572.799	519.939	438.638	410.401	406	327.686	1589.92	762.229	2244.79	1729.82	0.38:0.38:0.47:0.87:0.57:0.71:0.80:0.73:0.61:0.58:0.57:0.46:2.23:1.07:3.15:2.42	375.137	501.521	395.681	1581.69	0.53:0.70:0.55:2.22	152931	Carboxypeptidase D OS=Homo sapiens OX=9606 GN=CPD PE=1 SV=2
425	TRUE	Q86SJ2|AMGO2_HUMAN	22.35	18.2	9	9	Oxidation (M)	531.495	555.265	949.592	924.311	508.798	635.314	403.809	435.471	13929.3	15404.6	1400.65	1549.75	3889.83	878.625	1711.28	1255.78	0.19:0.20:0.34:0.33:0.18:0.23:0.14:0.15:4.96:5.48:0.50:0.55:1.38:0.31:0.61:0.45	740.166	495.848	8071.09	1933.88	0.26:0.18:2.87:0.69	57934	Amphoterin-induced protein 2 OS=Homo sapiens OX=9606 GN=AMIGO2 PE=1 SV=1
843	TRUE	P07858|CATB_HUMAN	21.33	14.75	3	3	Oxidation (M)	264.508	242.332	259.104	286.101	216.996	268.512	1013.96	768.236	3185.13	3858.57	810.523	773.564	621.179	427.125	479.149	999.269	0.29:0.27:0.29:0.32:0.24:0.30:1.12:0.85:3.52:4.27:0.90:0.86:0.69:0.47:0.53:1.10	326.806	566.925	2156.95	631.68	0.35:0.62:2.34:0.69	37822	Cathepsin B OS=Homo sapiens OX=9606 GN=CTSB PE=1 SV=3
524	TRUE	Q9BXS5|AP1M1_HUMAN	11.96	23.17	8	8	Oxidation (M)	919.499	1021.22	1499.95	1426.86	1140.31	1561.74	1775.82	1642.71	9244.56	7863.47	1379.01	1714.41	3026.3	1464.55	2073.97	2248.53	0.37:0.41:0.60:0.57:0.46:0.62:0.71:0.66:3.70:3.15:0.55:0.69:1.21:0.59:0.83:0.90	1216.88	1564.99	5050.36	2203.34	0.49:0.62:2.01:0.88	48587	AP-1 complex subunit mu-1 OS=Homo sapiens OX=9606 GN=AP1M1 PE=1 SV=3
357	TRUE	O14786|NRP1_HUMAN	5.9	18.74	12	12	Oxidation (M)	1568.37	1790.32	1319.06	3139.5	872.621	1822.41	841.103	2290.47	7290.14	7668.99	1317.04	1510.87	2783.5	1216.61	3666.83	3295.34	0.59:0.68:0.50:1.18:0.33:0.69:0.32:0.86:2.75:2.89:0.50:0.57:1.05:0.46:1.38:1.24	1954.31	1456.65	4446.76	2740.57	0.74:0.55:1.68:1.03	103134	Neuropilin-1 OS=Homo sapiens OX=9606 GN=NRP1 PE=1 SV=3
931	TRUE	Q8NFH5|NUP35_HUMAN	2.72	19.02	4	4	Oxidation (M)	403.143	489.535	672.346	484.642	401.639	371.363	1050.31	425.231	2275.66	1409.65	349.059	110.718	1060.64	1757.76	1049.33	575.148	0.50:0.61:0.83:0.60:0.50:0.46:1.30:0.53:2.83:1.75:0.43:0.14:1.32:2.18:1.30:0.71	542.397	614.672	1229.77	1110.72	0.62:0.70:1.41:1.27	34774	Nucleoporin NUP35 OS=Homo sapiens OX=9606 GN=NUP35 PE=1 SV=1
855	TRUE	O95864|FADS2_HUMAN	13.36	11.71	4	4		339.375	565.1	895.669	815.971	680.7	700.948	600.408	506.871	9721.39	9415.07	1069.92	953.773	1396.32	3606.22	497.73	835.051	0.17:0.28:0.44:0.40:0.33:0.34:0.29:0.25:4.77:4.62:0.53:0.47:0.69:1.77:0.24:0.41	654.029	622.232	5290.04	1583.83	0.32:0.31:2.60:0.78	52259	Acyl-CoA 6-desaturase OS=Homo sapiens OX=9606 GN=FADS2 PE=1 SV=1
4	TRUE	O75369|FLNB_HUMAN	50.43	59.45	133	123	Carbamidomethylation; Oxidation (M)	1746.15	2364.17	2600.55	4116.43	1076.91	1354.03	1543.16	942.288	191257	180936	23174.8	23230.2	13039.8	8239.51	10151.8	18062	0.06:0.08:0.09:0.14:0.04:0.04:0.05:0.03:6.32:5.98:0.77:0.77:0.43:0.27:0.34:0.60	2706.82	1229.1	104649	12373.3	0.09:0.04:3.46:0.41	278164	Filamin-B OS=Homo sapiens OX=9606 GN=FLNB PE=1 SV=2
464	TRUE	Q05682|CALD1_HUMAN	24.95	13.11	9	9		98.5715	85.0351	203.701	118.689	319.059	147.638	842.472	427.873	3361.23	4597.26	665.891	465.433	821.7	527.953	324.914	732.853	0.11:0.10:0.24:0.14:0.37:0.17:0.98:0.50:3.91:5.35:0.78:0.54:0.96:0.61:0.38:0.85	173.371	491.534	2272.45	634.19	0.19:0.55:2.55:0.71	93231	Caldesmon OS=Homo sapiens OX=9606 GN=CALD1 PE=1 SV=3
847	TRUE	P17302|CXA1_HUMAN	30.8	12.83	3	3	Oxidation (M)	0	0	58.7175	0	0	0	0	0	224.92	389.192	0	0	110.484	0	55.0002	67.4429	0.00:0.00:1.04:0.00:0.00:0.00:0.00:0.00:3.97:6.87:0.00:0.00:1.95:0.00:0.97:1.19	58.7175	0	307.056	112.431	0.49:0.00:2.57:0.94	43008	Gap junction alpha-1 protein OS=Homo sapiens OX=9606 GN=GJA1 PE=1 SV=2
904	TRUE	Q7RTP6|MICA3_HUMAN	25.58	2.05	3	3		0	0	68.8484	0	60.6332	80.9637	110.357	160.563	4389.29	4195.9	86.1609	82.7893	693.136	69.7244	571.915	833.23	0.00:0.00:0.10:0.00:0.09:0.11:0.15:0.23:6.16:5.89:0.12:0.12:0.97:0.10:0.80:1.17	68.8484	103.129	2267.94	542.001	0.09:0.14:3.04:0.73	224295	[F-actin]-monooxygenase MICAL3 OS=Homo sapiens OX=9606 GN=MICAL3 PE=1 SV=2
168	TRUE	P21589|5NTD_HUMAN	39.85	40.07	20	20	Oxidation (M)	2447.58	3672.24	5060.76	5636.52	3230.8	2978.82	2243.35	1767.33	71045.4	66041.1	15978.1	12599	6852.24	4102.26	5231.91	5425.81	0.18:0.27:0.38:0.42:0.24:0.22:0.17:0.13:5.30:4.93:1.19:0.94:0.51:0.31:0.39:0.41	4238.21	2555.08	41888.2	5607.94	0.31:0.19:3.09:0.41	63368	5'-nucleotidase OS=Homo sapiens OX=9606 GN=NT5E PE=1 SV=1
934	TRUE	O15498|YKT6_HUMAN	5.68	22.22	3	3	Oxidation (M)	155.881	212.571	422.331	328.082	347.486	312.771	117.167	227.697	2022.74	1440.98	221.481	173.752	847.53	337.794	402.272	458.833	0.31:0.42:0.84:0.65:0.69:0.62:0.23:0.45:4.03:2.87:0.44:0.35:1.69:0.67:0.80:0.91	323.412	283.561	1161.06	559.419	0.56:0.49:2.00:0.96	22418	Synaptobrevin homolog YKT6 OS=Homo sapiens OX=9606 GN=YKT6 PE=1 SV=1
202	TRUE	Q9UKV3|ACINU_HUMAN	7.49	18.79	17	17	Acetylation (N-term); Carbamidomethylation	2739.86	6023.61	3187.35	3466.79	3404.04	10437.6	3540.11	1064.53	13067	10846.2	6463.21	4674.74	3923.58	7830.03	4919.12	4890.68	0.48:1.07:0.56:0.61:0.60:1.85:0.63:0.19:2.31:1.92:1.14:0.83:0.69:1.38:0.87:0.86	3854.4	4611.56	8762.78	5390.85	0.68:0.82:1.55:0.95	151862	Apoptotic chromatin condensation inducer in the nucleus OS=Homo sapiens OX=9606 GN=ACIN1 PE=1 SV=2
596	TRUE	P51159|RB27A_HUMAN	20.48	23.98	5	5		50.3897	58.5683	444.577	243.216	137.013	603.699	392.758	1091.89	2531.7	1795.82	16584.1	225.195	2421.09	25094.4	1946.06	3302.42	0.02:0.02:0.12:0.07:0.04:0.17:0.11:0.31:0.71:0.50:4.66:0.06:0.68:7.05:0.55:0.93	299.177	602.491	5339.02	8282.95	0.08:0.17:1.47:2.28	24868	Ras-related protein Rab-27A OS=Homo sapiens OX=9606 GN=RAB27A PE=1 SV=3
104	TRUE	P33527|MRP1_HUMAN	4.86	27.43	29	29	Carbamidomethylation; Oxidation (M)	7959.22	10326.4	15982.2	12116.4	10463.5	10900.8	5711.03	10041.7	8131.06	8664.53	7580.17	7549.24	7716.08	4304.16	10039.2	10836.5	0.86:1.11:1.72:1.31:1.13:1.18:0.62:1.08:0.88:0.93:0.82:0.81:0.83:0.46:1.08:1.17	11596	9279.25	7981.25	8223.99	1.25:1.00:0.86:0.89	171591	Multidrug resistance-associated protein 1 OS=Homo sapiens OX=9606 GN=ABCC1 PE=1 SV=3
780	TRUE	Q99549|MPP8_HUMAN	43.86	4.07	2	2		0	0	0	0	0	0	61.1582	0	4683.36	4375.07	99.3123	161.976	417.129	344.36	370.501	518.485	0.00:0.00:0.00:0.00:0.00:0.00:0.09:0.00:6.79:6.35:0.14:0.23:0.61:0.50:0.54:0.75	0	61.1582	2649.54	412.619	0.00:0.08:3.39:0.53	97182	M-phase phosphoprotein 8 OS=Homo sapiens OX=9606 GN=MPHOSPH8 PE=1 SV=2
873	TRUE	P41440|S19A1_HUMAN	9.1	7.45	3	3		106.377	337.055	492.56	156.242	265.253	409.986	0	127.304	2219.73	2240.39	410.1	309.307	738.052	472.485	240.112	154.75	0.20:0.62:0.91:0.29:0.49:0.76:0.00:0.23:4.09:4.13:0.76:0.57:1.36:0.87:0.44:0.29	313.753	304.941	1514.94	419.259	0.49:0.48:2.37:0.66	64868	Reduced folate transporter OS=Homo sapiens OX=9606 GN=SLC19A1 PE=1 SV=3
781	TRUE	Q96CX2|KCD12_HUMAN	7.6	10.46	3	3	Oxidation (M)	4369.55	1166.33	435.631	453.777	3127.1	1921.46	1388.75	1689.49	1250.66	1214.22	1115.51	587.024	594.277	441.809	866.613	942.664	3.24:0.87:0.32:0.34:2.32:1.43:1.03:1.25:0.93:0.90:0.83:0.44:0.44:0.33:0.64:0.70	1626.04	2108.64	1041.85	711.341	1.19:1.54:0.76:0.52	35701	BTB/POZ domain-containing protein KCTD12 OS=Homo sapiens OX=9606 GN=KCTD12 PE=1 SV=1
398	TRUE	O43155|FLRT2_HUMAN	36.54	24.39	11	11	Oxidation (M)	1335.32	975.006	1059.23	1314.95	1111.31	1280.27	478.532	909.977	21752.3	22326.1	4506.61	5372.34	2360.65	492.577	867.598	1410.05	0.32:0.23:0.25:0.31:0.26:0.30:0.11:0.22:5.15:5.29:1.07:1.27:0.56:0.12:0.21:0.33	1211.1	945.023	13489.3	1282.72	0.29:0.22:3.19:0.30	74049	Leucine-rich repeat transmembrane protein FLRT2 OS=Homo sapiens OX=9606 GN=FLRT2 PE=1 SV=1
119	TRUE	O75165|DJC13_HUMAN	24.16	14.53	24	24	Carbamidomethylation; Oxidation (M)	1757.94	1673.17	975.706	1129.73	1569.53	1520.41	786.451	855.843	4198.62	4323.01	2205.06	1989.26	1259.25	1503.27	1197.06	985.96	1.01:0.96:0.56:0.65:0.90:0.87:0.45:0.49:2.41:2.48:1.26:1.14:0.72:0.86:0.69:0.56	1441.56	1233.4	3387.74	1236.39	0.79:0.68:1.86:0.68	254415	DnaJ homolog subfamily C member 13 OS=Homo sapiens OX=9606 GN=DNAJC13 PE=1 SV=5
411	TRUE	O75326|SEM7A_HUMAN	31.89	17.72	7	7	Oxidation (M)	151.886	185.446	250.054	231.357	160.018	183.757	155.166	281.206	23354.7	23269.1	723.678	2085.53	1016.54	3452.86	1352.85	979.707	0.04:0.05:0.07:0.06:0.04:0.05:0.04:0.08:6.46:6.44:0.20:0.58:0.28:0.96:0.37:0.27	234.681	272.462	12534.7	1739.55	0.06:0.07:3.39:0.47	74824	Semaphorin-7A OS=Homo sapiens OX=9606 GN=SEMA7A PE=1 SV=1
336	TRUE	P27105|STOM_HUMAN	9.97	52.43	9	9	Carbamidomethylation; Oxidation (M)	16380.2	15314.3	21863.2	23522.8	64020.5	65012.6	20947.8	18575.9	25919.1	23756.3	4198.27	3878.41	24332.8	14132.6	14889.8	15833.8	0.70:0.66:0.94:1.01:2.75:2.79:0.90:0.80:1.11:1.02:0.18:0.17:1.04:0.61:0.64:0.68	19270.1	42139.2	14473.2	17325.1	0.83:1.81:0.62:0.74	31731	Stomatin OS=Homo sapiens OX=9606 GN=STOM PE=1 SV=3
392	TRUE	Q96SB4|SRPK1_HUMAN	14.4	21.53	10	10	Carbamidomethylation; Oxidation (M)	1189.23	1731.75	1318.54	1298.98	1908.86	2030.96	1500.42	1415.39	9985.67	9889.61	2830.51	1755.62	2766.28	697.863	2386.23	2098.37	0.42:0.62:0.47:0.46:0.68:0.73:0.54:0.51:3.57:3.53:1.01:0.63:0.99:0.25:0.85:0.75	1403.14	1713.91	6115.35	1987.19	0.50:0.61:2.18:0.71	74325	SRSF protein kinase 1 OS=Homo sapiens OX=9606 GN=SRPK1 PE=1 SV=2
252	TRUE	P55290|CAD13_HUMAN	51.48	26.09	12	12	Oxidation (M)	995.877	1035.46	1473.37	711.427	280.2	350.536	927.345	757.659	61955.3	60463.9	14769.5	9741.39	458.618	228.248	835.887	1190.33	0.10:0.11:0.15:0.07:0.03:0.04:0.10:0.08:6.35:6.19:1.51:1.00:0.05:0.02:0.09:0.12	1054.03	578.935	36732.5	812.209	0.11:0.06:3.75:0.08	78287	Cadherin-13 OS=Homo sapiens OX=9606 GN=CDH13 PE=1 SV=1
1046	TRUE	P28908|TNR8_HUMAN	52.62	5.38	3	3		319.944	393.127	727.735	760.603	122.68	254.544	191.647	131.83	19005.6	18328.6	2747.32	3915.07	588.809	468.5	422.288	500.308	0.10:0.13:0.24:0.25:0.04:0.08:0.06:0.04:6.22:6.00:0.90:1.28:0.19:0.15:0.14:0.16	584.953	219.858	10999.1	494.976	0.19:0.07:3.58:0.16	63747	Tumor necrosis factor receptor superfamily member 8 OS=Homo sapiens OX=9606 GN=TNFRSF8 PE=1 SV=1
901	TRUE	Q9NUT2|MITOS_HUMAN	75.4	7.35	4	4		0	0	0	0	0	0	0	0	1839.58	899.7	0	0	396.748	0	240.205	64.9145	0.00:0.00:0.00:0.00:0.00:0.00:0.00:0.00:8.55:4.18:0.00:0.00:1.84:0.00:1.12:0.30	0	0	1369.64	233.956	0.00:0.00:3.42:0.58	79989	Mitochondrial potassium channel ATP-binding subunit OS=Homo sapiens OX=9606 GN=ABCB8 PE=1 SV=3
445	TRUE	Q5D862|FILA2_HUMAN	29.65	2.09	4	4		793.45	1065.25	972.416	658.864	3116.16	4609.36	6200.71	9176.65	1153.31	1077.95	263.36	166.309	913.907	903.761	2162.37	2994.17	0.35:0.47:0.43:0.29:1.38:2.04:2.74:4.05:0.51:0.48:0.12:0.07:0.40:0.40:0.96:1.32	913.916	5841.2	703.249	1828.58	0.39:2.52:0.30:0.79	248073	Filaggrin-2 OS=Homo sapiens OX=9606 GN=FLG2 PE=1 SV=1
1030	TRUE	Q01628|IFM3_HUMAN	51.23	30.83	2	2	Oxidation (M)	304.588	246.946	739.646	778.059	10779.4	22554.2	7859.34	4096.69	6161.24	9861.47	2239.03	2168.58	27958.9	18383.8	29202.6	17365.5	0.03:0.02:0.07:0.08:1.07:2.25:0.78:0.41:0.61:0.98:0.22:0.22:2.78:1.83:2.91:1.73	517.31	11949.3	5169.55	23227.7	0.05:1.17:0.51:2.27	14632	Interferon-induced transmembrane protein 3 OS=Homo sapiens OX=9606 GN=IFITM3 PE=1 SV=2
795	TRUE	P07948|LYN_HUMAN	5.58	11.13	5	5	Oxidation (M)	598.573	697.322	1404.19	944.725	1173.1	805.201	1116.92	1537.37	5914.97	6213.62	779.316	982.473	1631.53	538.479	1759.2	2433.99	0.34:0.39:0.79:0.53:0.66:0.45:0.63:0.86:3.32:3.48:0.44:0.55:0.91:0.30:0.99:1.36	911.203	1158.15	3472.59	1590.8	0.51:0.65:1.95:0.89	58574	Tyrosine-protein kinase Lyn OS=Homo sapiens OX=9606 GN=LYN PE=1 SV=3
682	TRUE	Q14699|RFTN1_HUMAN	13.86	7.09	3	3		105.621	69.1445	108.046	81.515	220.142	328.312	140.642	133.831	1885.63	1753.31	173.515	149.988	202.404	169.922	436.834	286.33	0.27:0.18:0.28:0.21:0.56:0.84:0.36:0.34:4.83:4.49:0.44:0.38:0.52:0.44:1.12:0.73	91.0814	247.351	1309.48	301.87	0.19:0.51:2.69:0.62	63146	Raftlin OS=Homo sapiens OX=9606 GN=RFTN1 PE=1 SV=4
1012	TRUE	Q96QD8|S38A2_HUMAN	5.33	10.47	3	3		3145.09	2056.95	5420.09	5531.87	7859	8918.56	3290.51	3090.62	10143.8	10377.9	2144.14	2773.32	8744.23	4111.67	12604.9	14595.3	0.48:0.31:0.83:0.84:1.20:1.36:0.50:0.47:1.55:1.58:0.33:0.42:1.33:0.63:1.92:2.23	4038.5	5789.67	7042.94	10268.6	0.60:0.85:1.04:1.51	56026	Sodium-coupled neutral amino acid transporter 2 OS=Homo sapiens OX=9606 GN=SLC38A2 PE=1 SV=2
185	TRUE	P22735|TGM1_HUMAN	78.97	29.25	18	18	Oxidation (M)	768.633	570.461	703.796	954.468	4275.46	4854.23	6845.59	6566.55	2391.16	1361.35	975.153	981.314	15717.7	11244.4	15726.4	17538.8	0.13:0.10:0.12:0.17:0.75:0.85:1.20:1.15:0.42:0.24:0.17:0.17:2.75:1.97:2.75:3.07	811.959	5635.46	1427.25	15056.8	0.14:0.98:0.25:2.63	89787	Protein-glutamine gamma-glutamyltransferase K OS=Homo sapiens OX=9606 GN=TGM1 PE=1 SV=4
790	TRUE	Q7Z402|TMC7_HUMAN	12.85	5.39	4	4	Oxidation (M)	213.569	231.598	644.24	612.914	1527.26	2191.61	737.827	583.764	579.366	565.649	104.702	106.65	364.498	261.59	659.091	497.823	0.35:0.37:1.04:0.99:2.47:3.55:1.19:0.95:0.94:0.92:0.17:0.17:0.59:0.42:1.07:0.81	443.582	1260.12	506.695	516.771	0.65:1.85:0.74:0.76	83502	Transmembrane channel-like protein 7 OS=Homo sapiens OX=9606 GN=TMC7 PE=1 SV=1
985	TRUE	P62942|FKB1A_HUMAN	6.64	25	2	2	Oxidation (M)	196.167	233.141	674.337	666.306	647.506	783.655	582.012	722.099	2288.18	1365.44	392.031	445.432	1222.19	769.204	540.596	854.455	0.25:0.30:0.87:0.86:0.84:1.01:0.75:0.93:2.96:1.76:0.51:0.58:1.58:0.99:0.70:1.10	442.488	683.818	1122.77	846.612	0.57:0.88:1.45:1.09	11951	Peptidyl-prolyl cis-trans isomerase FKBP1A OS=Homo sapiens OX=9606 GN=FKBP1A PE=1 SV=2
798	TRUE	P35354|PGH2_HUMAN	4.27	14.4	5	5	Oxidation (M)	1139.07	1296.71	709.919	1070.14	1317.41	1336.05	1112.76	1025.44	4833.83	4420.72	1499.76	781.321	732.803	3187.04	429.149	1985.48	0.68:0.77:0.42:0.64:0.78:0.80:0.66:0.61:2.88:2.63:0.89:0.47:0.44:1.90:0.26:1.18	1155.69	1197.91	2993.55	1583.62	0.67:0.69:1.73:0.91	68996	Prostaglandin G/H synthase 2 OS=Homo sapiens OX=9606 GN=PTGS2 PE=1 SV=2
924	TRUE	O94910|AGRL1_HUMAN	77.31	2.99	3	3	Oxidation (M)	0	0	0	0	0	0	0	0	540.807	511.466	70.9781	79.7315	0	0	0	0	0.00:0.00:0.00:0.00:0.00:0.00:0.00:0.00:7.19:6.80:0.94:1.06:0.00:0.00:0.00:0.00	0	0	437.976	0	0.00:0.00:4.00:0.00	162717	Adhesion G protein-coupled receptor L1 OS=Homo sapiens OX=9606 GN=ADGRL1 PE=1 SV=1
1019	TRUE	Q96S97|MYADM_HUMAN	2.28	10.25	2	2	Oxidation (M)	3379	3569.26	3492.37	2932.91	3858.87	5432.83	2943.73	2096.92	20217.6	19002.4	1424.23	2678.38	5764.21	2453	5456.65	8664.05	0.58:0.61:0.60:0.50:0.66:0.93:0.50:0.36:3.46:3.26:0.24:0.46:0.99:0.42:0.94:1.48	3366.61	3603.75	10830.7	5584.48	0.58:0.62:1.85:0.96	35274	Myeloid-associated differentiation marker OS=Homo sapiens OX=9606 GN=MYADM PE=1 SV=2
394	TRUE	O75044|SRGP2_HUMAN	13.23	8.12	8	8	Oxidation (M)	539.159	629.226	1049.46	1058.29	2122.92	2469.1	1555.8	816.989	2205.37	2329.64	785.024	803.146	3918.7	1283.04	2198.7	2868.55	0.32:0.38:0.63:0.64:1.28:1.48:0.93:0.49:1.32:1.40:0.47:0.48:2.35:0.77:1.32:1.72	819.033	1741.2	1530.8	2567.25	0.49:1.05:0.92:1.54	120871	SLIT-ROBO Rho GTPase-activating protein 2 OS=Homo sapiens OX=9606 GN=SRGAP2 PE=1 SV=3
925	TRUE	Q00587|BORG5_HUMAN	14.19	13.3	3	3	Oxidation (M)	209.965	191.938	279.434	215.284	156.495	304.407	123.589	375.621	8280.62	3782.54	332.65	326.568	1107.19	314.507	838.533	870.102	0.19:0.17:0.25:0.19:0.14:0.28:0.11:0.34:7.48:3.42:0.30:0.30:1.00:0.28:0.76:0.79	224.155	240.028	3777.13	888.972	0.17:0.19:2.94:0.69	40295	Cdc42 effector protein 1 OS=Homo sapiens OX=9606 GN=CDC42EP1 PE=1 SV=1
308	TRUE	O60603|TLR2_HUMAN	27.65	18.62	12	12	Oxidation (M)	947.415	882.871	1013.7	861.559	722.068	1926.45	1490.73	1431.09	9758.65	9844.78	2082.69	2677.37	1485.84	808.007	821.851	1298.8	0.40:0.37:0.43:0.36:0.30:0.81:0.63:0.60:4.10:4.14:0.88:1.13:0.62:0.34:0.35:0.55	926.387	1392.58	6090.87	1103.62	0.39:0.59:2.56:0.46	89838	Toll-like receptor 2 OS=Homo sapiens OX=9606 GN=TLR2 PE=1 SV=1
742	TRUE	Q6ZRP7|QSOX2_HUMAN	1.68	11.32	6	6		485.914	516.377	971.803	1000.74	532.731	479.488	283.3	463.825	3324.26	3347.32	90.1555	387.101	754.523	617.359	1055.96	1573.1	0.49:0.52:0.98:1.01:0.54:0.48:0.29:0.47:3.35:3.37:0.09:0.39:0.76:0.62:1.06:1.58	743.708	439.836	2687.8	1079.97	0.60:0.36:2.17:0.87	77529	Sulfhydryl oxidase 2 OS=Homo sapiens OX=9606 GN=QSOX2 PE=1 SV=3
623	TRUE	Q9H9H4|VP37B_HUMAN	12.47	24.91	5	5	Oxidation (M)	2689.11	3272.17	3213.33	3198.57	4302.14	4977.52	1302.17	1525.98	1931.79	1713.15	746.171	538.443	3236.28	1313.91	3413.78	3613.72	1.05:1.28:1.25:1.25:1.68:1.94:0.51:0.60:0.75:0.67:0.29:0.21:1.26:0.51:1.33:1.41	3093.3	3026.95	1232.39	2894.42	1.21:1.18:0.48:1.13	31307	Vacuolar protein sorting-associated protein 37B OS=Homo sapiens OX=9606 GN=VPS37B PE=1 SV=1
167	TRUE	P13010|XRCC5_HUMAN	10.16	41.8	18	18	Oxidation (M)	1230.37	1128.53	1155.47	1731.93	572.608	670.595	852.45	1011.44	17091.7	16786	942.708	980.179	2660.46	1310.51	1415.05	1887.01	0.38:0.35:0.36:0.54:0.18:0.21:0.27:0.31:5.32:5.22:0.29:0.30:0.83:0.41:0.44:0.59	1311.57	776.774	8950.16	1818.26	0.41:0.24:2.78:0.57	82705	X-ray repair cross-complementing protein 5 OS=Homo sapiens OX=9606 GN=XRCC5 PE=1 SV=3
401	TRUE	Q16658|FSCN1_HUMAN	7.15	23.12	9	9	Carbamidomethylation	920.669	1144.93	1409.15	1534.02	1535.27	2453.53	1330.05	1235.56	11853.5	12791.6	992.944	1557.78	3556.24	1147.65	1798.8	1822	0.31:0.39:0.48:0.52:0.52:0.83:0.45:0.42:4.03:4.35:0.34:0.53:1.21:0.39:0.61:0.62	1252.19	1638.6	6798.94	2081.17	0.43:0.56:2.31:0.71	54530	Fascin OS=Homo sapiens OX=9606 GN=FSCN1 PE=1 SV=3
1259	TRUE	Q8N1I0|DOCK4_HUMAN	94.14	1.37	2	2		0	0	0	0	0	0	0	0	382.572	675.506	0	0	88.8102	0	0	55.2715	0.00:0.00:0.00:0.00:0.00:0.00:0.00:0.00:5.09:8.99:0.00:0.00:1.18:0.00:0.00:0.74	0	0	529.039	72.0409	0.00:0.00:3.52:0.48	225206	Dedicator of cytokinesis protein 4 OS=Homo sapiens OX=9606 GN=DOCK4 PE=1 SV=3
437	TRUE	P61026|RAB10_HUMAN	14.42	36	7	7		1497.4	1285.38	3008.02	3316.94	6786.11	7998.51	3831.29	3308.74	7355.78	6941.11	1526.02	1506.53	7422.67	5962.38	7357.78	10594.7	0.30:0.26:0.60:0.67:1.36:1.61:0.77:0.66:1.48:1.39:0.31:0.30:1.49:1.20:1.48:2.13	2276.93	5481.16	4760.76	7834.39	0.45:1.08:0.94:1.54	22541	Ras-related protein Rab-10 OS=Homo sapiens OX=9606 GN=RAB10 PE=1 SV=1
724	TRUE	Q8IXS6|PALM2_HUMAN	8.17	21.37	6	6		258.18	309.277	1282.55	315.944	258.796	1032.61	912.9	220.982	9965.69	10709.8	355.75	902.17	1328.35	244.765	961.583	1109.28	0.14:0.16:0.68:0.17:0.14:0.55:0.48:0.12:5.29:5.68:0.19:0.48:0.70:0.13:0.51:0.59	609.229	653.688	6067.6	1023.63	0.29:0.31:2.91:0.49	42185	Paralemmin-2 OS=Homo sapiens OX=9606 GN=PALM2 PE=1 SV=3
912	TRUE	P43007|SATT_HUMAN	2.71	8.08	3	3		327.992	447.517	629.855	438.851	394.25	427.999	1730.36	1804.43	3874.62	7143.18	213.416	308.565	2661.91	529.507	772.445	2166.7	0.22:0.30:0.42:0.29:0.26:0.29:1.16:1.21:2.60:4.79:0.14:0.21:1.78:0.35:0.52:1.45	493.774	1089.26	4820.31	1707	0.24:0.54:2.38:0.84	55723	Neutral amino acid transporter A OS=Homo sapiens OX=9606 GN=SLC1A4 PE=1 SV=1
1140	TRUE	O75608|LYPA1_HUMAN	3.54	16.09	2	2		627.444	678.073	693.529	608.432	240.632	395.35	3789.08	3487.05	7068.4	6877.51	426.236	428.719	2977.44	1226.97	2166.1	2926.43	0.29:0.31:0.32:0.28:0.11:0.18:1.75:1.61:3.27:3.18:0.20:0.20:1.38:0.57:1.00:1.35	651.869	1978.03	3700.22	2324.23	0.30:0.91:1.71:1.07	24670	Acyl-protein thioesterase 1 OS=Homo sapiens OX=9606 GN=LYPLA1 PE=1 SV=1
743	TRUE	P0DOX5|IGG1_HUMAN	8.21	21.6	6	5	Acetylation (N-term); Carbamidomethylation	74099.3	313222	152751	283811	299111	219965	193511	141303	62635	111249	91958.4	93453.7	122237	73745.7	358811	189806	0.43:1.80:0.88:1.63:1.72:1.27:1.11:0.81:0.36:0.64:0.53:0.54:0.70:0.42:2.06:1.09	205971	213472	89959.4	186172	1.18:1.23:0.52:1.07	49329	Immunoglobulin gamma-1 heavy chain OS=Homo sapiens OX=9606 PE=1 SV=2
39	TRUE	P08670|VIME_HUMAN	44.97	60.09	50	43	Carbamidomethylation; Oxidation (M)	1788.53	1786.22	1496.52	1392.71	1337.69	994.614	1712.59	1967.15	284147	294618	18930.7	20619.7	2232.32	1384.88	2366.67	2410.15	0.04:0.04:0.04:0.03:0.03:0.02:0.04:0.05:7.11:7.37:0.47:0.52:0.06:0.03:0.06:0.06	1616	1545.15	154579	2098.5	0.04:0.04:3.87:0.05	53652	Vimentin OS=Homo sapiens OX=9606 GN=VIM PE=1 SV=4
1024	TRUE	Q8IW75|SPA12_HUMAN	23.38	9.66	3	3		0	0	0	52.9001	101.648	154.67	845.163	778.332	128.511	67.8893	0	0	0	0	50.6373	0	0.00:0.00:0.00:0.39:0.75:1.14:6.20:5.71:0.94:0.50:0.00:0.00:0.00:0.00:0.37:0.00	52.9001	553.56	128.284	50.6373	0.27:2.82:0.65:0.26	47175	Serpin A12 OS=Homo sapiens OX=9606 GN=SERPINA12 PE=1 SV=1
929	TRUE	Q9UHG3|PCYOX_HUMAN	10.79	6.53	3	3	Oxidation (M)	251.51	518.621	618.796	851.497	1049.56	1400.45	694.605	715.471	673.783	1937.11	512.667	555.695	873.292	1414.27	1170.94	2642.3	0.25:0.52:0.62:0.86:1.06:1.41:0.70:0.72:0.68:1.95:0.52:0.56:0.88:1.42:1.18:2.66	618.023	965.022	919.814	1525.2	0.61:0.96:0.91:1.51	56640	Prenylcysteine oxidase 1 OS=Homo sapiens OX=9606 GN=PCYOX1 PE=1 SV=3
199	TRUE	Q9H4M9|EHD1_HUMAN	14.61	30.52	18	12	Oxidation (M)	1415.42	1402.4	1503.64	1347.54	6496.53	7102.27	3564.14	2135.71	7330.63	7469.05	978.101	2546.41	5116.93	3779.42	5654.16	6522.84	0.35:0.35:0.37:0.33:1.61:1.77:0.89:0.53:1.82:1.86:0.24:0.63:1.27:0.94:1.41:1.62	1417.25	4824.66	4581.05	5268.34	0.35:1.20:1.14:1.31	60627	EH domain-containing protein 1 OS=Homo sapiens OX=9606 GN=EHD1 PE=1 SV=2
667	TRUE	Q8NCG7|DGLB_HUMAN	2.12	11.76	6	6	Oxidation (M)	615.735	551.443	318.419	413.183	407.27	717.517	98.0649	162.152	3783.6	3589.65	122.626	199.6	1189.64	158.391	502.382	734.04	0.73:0.65:0.38:0.49:0.48:0.85:0.12:0.19:4.46:4.23:0.14:0.24:1.40:0.19:0.59:0.87	525.26	441.214	3306.58	772.749	0.42:0.35:2.62:0.61	73732	Diacylglycerol lipase-beta OS=Homo sapiens OX=9606 GN=DAGLB PE=1 SV=2
1064	TRUE	O60779|S19A2_HUMAN	10.6	11.67	3	3	Oxidation (M)	201.226	244.156	354.847	268.252	154.869	186.662	86.9368	112.227	2031.8	2372.89	214.669	175.684	189.751	88.0676	323.713	420.649	0.43:0.53:0.76:0.58:0.33:0.40:0.19:0.24:4.38:5.11:0.46:0.38:0.41:0.19:0.70:0.91	267.12	150.709	1856.67	294.644	0.42:0.23:2.89:0.46	55400	Thiamine transporter 1 OS=Homo sapiens OX=9606 GN=SLC19A2 PE=1 SV=2
219	TRUE	Q9Y6M7|S4A7_HUMAN	6.67	15.32	13	13	Oxidation (M)	821.128	1903.89	1279.06	1646.16	882.167	1092.06	986.504	934.751	11740.7	15257.3	1268.73	657.759	2115.36	993.778	1987.56	1470.32	0.29:0.68:0.45:0.58:0.31:0.39:0.35:0.33:4.17:5.42:0.45:0.23:0.75:0.35:0.71:0.52	1412.56	973.871	7735.71	1641.75	0.48:0.33:2.63:0.56	136044	Sodium bicarbonate cotransporter 3 OS=Homo sapiens OX=9606 GN=SLC4A7 PE=1 SV=2
420	TRUE	P06744|G6PI_HUMAN	8.19	18.28	6	6	Oxidation (M)	1220.74	973.304	2748.34	653.096	1221.6	664.473	3871.66	3996.51	11531.2	10429.6	1840.33	1988.25	3480.55	1601.2	1509.11	2403.2	0.39:0.31:0.88:0.21:0.39:0.21:1.24:1.28:3.68:3.33:0.59:0.63:1.11:0.51:0.48:0.77	1432.94	2730.38	6891	2248.52	0.43:0.82:2.07:0.68	63147	Glucose-6-phosphate isomerase OS=Homo sapiens OX=9606 GN=GPI PE=1 SV=4
893	TRUE	Q9BRQ8|FSP1_HUMAN	24.11	13.94	4	4		73.368	104.62	158.514	145.872	2147.63	259.522	251.48	316.354	740.624	1062.48	696.94	296.197	1392.33	498.974	822.226	1391.2	0.11:0.16:0.24:0.23:3.32:0.40:0.39:0.49:1.14:1.64:1.08:0.46:2.15:0.77:1.27:2.15	120.593	783.947	827.197	1026.18	0.17:1.14:1.20:1.49	40527	Ferroptosis suppressor protein 1 OS=Homo sapiens OX=9606 GN=AIFM2 PE=1 SV=1
1071	TRUE	P14384|CBPM_HUMAN	20.61	6.55	2	2		174.086	135.146	354.175	398.779	558.556	624.433	651.024	279.935	669.723	232.807	326.187	247.954	1805.89	883.282	755.537	632.876	0.32:0.25:0.65:0.73:1.02:1.14:1.19:0.51:1.23:0.43:0.60:0.45:3.31:1.62:1.38:1.16	315.911	528.487	369.168	1019.4	0.57:0.95:0.66:1.83	50514	Carboxypeptidase M OS=Homo sapiens OX=9606 GN=CPM PE=1 SV=2
338	TRUE	O14672|ADA10_HUMAN	22.5	14.04	8	8	Oxidation (M)	12430.7	12117.3	23372.6	23654.8	35555.5	43841.5	20894.1	19347.1	27913.6	26761.1	12258.3	11369.2	51463.7	35047.8	62216	67566.5	0.41:0.40:0.77:0.78:1.17:1.44:0.69:0.64:0.92:0.88:0.40:0.37:1.69:1.15:2.05:2.23	17893.9	29909.5	19575.5	54073.5	0.59:0.99:0.64:1.78	84142	Disintegrin and metalloproteinase domain-containing protein 10 OS=Homo sapiens OX=9606 GN=ADAM10 PE=1 SV=1
137	TRUE	Q02413|DSG1_HUMAN	12.78	23.45	23	23	Oxidation (M)	940.262	3943.75	996.28	5035.06	3073.49	3121.13	99784.2	102028	2121.26	925.254	598.729	2576.77	1424.14	570.052	4143.16	5367.93	0.06:0.27:0.07:0.34:0.21:0.21:6.75:6.90:0.14:0.06:0.04:0.17:0.10:0.04:0.28:0.36	2858.3	53386.1	1636.73	3183.97	0.19:3.50:0.11:0.21	113748	Desmoglein-1 OS=Homo sapiens OX=9606 GN=DSG1 PE=1 SV=2
636	TRUE	O15144|ARPC2_HUMAN	9.51	19.67	5	5	Oxidation (M)	700.128	700.725	481.491	928.032	873.139	1280.03	1713.41	1698.1	1337.57	4205.55	745.411	762.525	2066.84	1169.58	1394.12	1866.57	0.51:0.51:0.35:0.68:0.64:0.93:1.25:1.24:0.98:3.07:0.54:0.56:1.51:0.85:1.02:1.36	702.594	1391.17	1762.77	1624.28	0.51:1.02:1.29:1.19	34333	Actin-related protein 2/3 complex subunit 2 OS=Homo sapiens OX=9606 GN=ARPC2 PE=1 SV=1
450	TRUE	P25311|ZA2G_HUMAN	13.78	28.86	6	6	Oxidation (M)	1047.8	1089.21	1619.72	1310.41	1507.01	1583.99	30928.8	29398.2	1019.4	1726.51	909.386	1455.71	1372.58	1507.48	626.334	1266.36	0.21:0.22:0.33:0.27:0.31:0.32:6.31:6.00:0.21:0.35:0.19:0.30:0.28:0.31:0.13:0.26	1266.78	15854.5	1277.75	1193.19	0.26:3.24:0.26:0.24	34259	Zinc-alpha-2-glycoprotein OS=Homo sapiens OX=9606 GN=AZGP1 PE=1 SV=2
516	TRUE	P01040|CYTA_HUMAN	18.79	75.51	8	8		3054.55	1910.64	1963.75	2586.61	4638.44	5698.13	138584	134398	2993.65	3312.73	1904.48	2033.11	4111.46	1750.12	3924.79	4256.18	0.15:0.10:0.10:0.13:0.23:0.29:6.99:6.78:0.15:0.17:0.10:0.10:0.21:0.09:0.20:0.21	2378.89	70829.8	2560.99	3510.64	0.12:3.57:0.13:0.18	11006	Cystatin-A OS=Homo sapiens OX=9606 GN=CSTA PE=1 SV=1
625	TRUE	P67775|PP2AA_HUMAN	23.04	21.36	5	4	Carbamidomethylation; Oxidation (M)	354.724	840.009	1722.21	896.571	386.149	309.727	186.187	634.82	9703.32	2436.09	2431.06	1065.28	476.503	766.797	1177.91	702.497	0.24:0.56:1.14:0.60:0.26:0.21:0.12:0.42:6.44:1.62:1.61:0.71:0.32:0.51:0.78:0.47	1152.37	379.221	4050.8	1248.83	0.67:0.22:2.37:0.73	35594	Serine/threonine-protein phosphatase 2A catalytic subunit alpha isoform OS=Homo sapiens OX=9606 GN=PPP2CA PE=1 SV=1
316	TRUE	Q16555|DPYL2_HUMAN	13.33	34.27	11	11	Oxidation (M)	5358.67	5487.07	1232.8	1036.26	5400.56	799.813	547.382	626.854	4009.46	3779.91	13592.8	13589.9	2982.01	1012.11	2568.05	2479.2	1.33:1.36:0.31:0.26:1.34:0.20:0.14:0.16:0.99:0.94:3.37:3.37:0.74:0.25:0.64:0.61	3332.45	1959.3	8743.04	2260.34	0.82:0.48:2.15:0.55	62294	Dihydropyrimidinase-related protein 2 OS=Homo sapiens OX=9606 GN=DPYSL2 PE=1 SV=1
374	TRUE	P05109|S10A8_HUMAN	12.55	51.61	10	10	Carbamidomethylation; Oxidation (M)	1704.47	1684.05	3391.87	2959.37	3319.51	1914.34	284862	258896	1041.53	2613.53	2046.97	1609.5	2339.62	3035.57	2255.65	1807.2	0.05:0.05:0.09:0.08:0.09:0.05:7.92:7.20:0.03:0.07:0.06:0.04:0.07:0.08:0.06:0.05	2434.94	137248	1827.88	2359.51	0.07:3.82:0.05:0.07	10835	Protein S100-A8 OS=Homo sapiens OX=9606 GN=S100A8 PE=1 SV=1
674	TRUE	Q96P63|SPB12_HUMAN	12.29	26.91	7	6	Oxidation (M)	1372.89	1532.79	1260.8	1480.73	1630.68	1994.99	11696.1	10163.5	2092.29	2097.09	690.74	770.055	1616.7	729.426	1869.74	2214.73	0.51:0.57:0.47:0.55:0.60:0.74:4.33:3.76:0.77:0.78:0.26:0.29:0.60:0.27:0.69:0.82	1427.69	6780.81	1448.51	1623.73	0.51:2.40:0.51:0.58	46276	Serpin B12 OS=Homo sapiens OX=9606 GN=SERPINB12 PE=1 SV=1
831	TRUE	P09525|ANXA4_HUMAN	11.74	17.24	4	4	Oxidation (M)	186.175	220.969	585.961	584.456	421.74	578.205	3246.98	2741.05	358.657	608.794	318.907	329.658	690.239	268.271	267.274	492.399	0.25:0.30:0.79:0.79:0.57:0.78:4.37:3.69:0.48:0.82:0.43:0.44:0.93:0.36:0.36:0.66	494.494	1746.99	457.787	451.728	0.63:2.22:0.58:0.57	35883	Annexin A4 OS=Homo sapiens OX=9606 GN=ANXA4 PE=1 SV=4
409	TRUE	P21281|VATB2_HUMAN	5.69	25.83	10	10	Carbamidomethylation; Oxidation (M)	1375.19	1407.65	2177.08	1440.97	1340.91	873.15	6176.92	8074.2	7959.15	8787.22	1526.16	3906.01	4665.06	1526.09	4549.88	5355.57	0.36:0.37:0.57:0.38:0.35:0.23:1.62:2.11:2.08:2.30:0.40:1.02:1.22:0.40:1.19:1.40	1644.3	4172.83	5544.64	4024.15	0.43:1.08:1.44:1.05	56501	V-type proton ATPase subunit B, brain isoform OS=Homo sapiens OX=9606 GN=ATP6V1B2 PE=1 SV=3
644	TRUE	P43121|MUC18_HUMAN	14.8	11.3	5	5		466.648	452.164	764.327	464.683	184.888	169.484	246.164	155.916	2998.97	2704.1	307.317	402.176	680.79	192.044	450.725	168.652	0.69:0.67:1.13:0.69:0.27:0.25:0.36:0.23:4.44:4.00:0.45:0.60:1.01:0.28:0.67:0.25	601.053	225.683	1673.67	451.31	0.81:0.31:2.27:0.61	71607	Cell surface glycoprotein MUC18 OS=Homo sapiens OX=9606 GN=MCAM PE=1 SV=2
586	TRUE	Q9UJU6|DBNL_HUMAN	2.32	22.56	7	7	Oxidation (M)	2113.22	730.559	2383.87	2350.11	1927.56	1503.71	477.602	2217.79	3374.25	3746.68	1170.13	1145.79	1995.03	1701.32	2555.07	3023.87	1.04:0.36:1.18:1.16:0.95:0.74:0.24:1.09:1.67:1.85:0.58:0.57:0.98:0.84:1.26:1.49	1894.44	1531.67	2359.21	2318.82	0.94:0.76:1.16:1.14	48207	Drebrin-like protein OS=Homo sapiens OX=9606 GN=DBNL PE=1 SV=1
120	TRUE	P06702|S10A9_HUMAN	2.41	91.23	26	26	Acetylation (N-term); Oxidation (M)	11747.5	12769.6	10006.1	10136.9	1413.63	5136.19	1.03664e+06	1.01999e+06	19781.8	20613.8	10162.3	10627.9	16885.7	12048.8	15322.3	6049.87	0.08:0.09:0.07:0.07:0.02:0.04:7.47:7.35:0.14:0.15:0.07:0.08:0.12:0.09:0.11:0.04	11165	515795	15296.4	12576.7	0.08:3.72:0.11:0.09	13242	Protein S100-A9 OS=Homo sapiens OX=9606 GN=S100A9 PE=1 SV=1
863	TRUE	Q15517|CDSN_HUMAN	18.78	7.94	2	2	Oxidation (M)	501.365	509.338	73.1267	1431.44	2122.81	2549.13	34826.7	34220.9	1989.15	328.082	1119.05	1147.93	2961.23	1856.37	1077.35	647.224	0.09:0.09:0.02:0.26:0.39:0.47:6.38:6.27:0.36:0.06:0.20:0.21:0.54:0.34:0.20:0.12	675.09	18429.9	1232.76	1635.54	0.12:3.35:0.22:0.30	51522	Corneodesmosin OS=Homo sapiens OX=9606 GN=CDSN PE=1 SV=3
467	TRUE	P55011|S12A2_HUMAN	3.52	5.78	5	5	Oxidation (M)	385.515	276.879	3090	1515.89	777.944	2029.14	460.541	623.462	3025.99	2432.33	581.518	2292.56	1775.58	770.602	1468.93	1956.78	0.26:0.19:2.11:1.03:0.53:1.38:0.31:0.43:2.06:1.66:0.40:1.56:1.21:0.53:1.00:1.33	1317.07	1056.11	2457.6	1492.97	0.83:0.67:1.55:0.94	131447	Solute carrier family 12 member 2 OS=Homo sapiens OX=9606 GN=SLC12A2 PE=1 SV=1
149	TRUE	Q08554|DSC1_HUMAN	13.89	29.64	25	25	Carbamidomethylation; Oxidation (M)	3877.01	3983.29	3025.45	1628.7	4698.15	4653.32	121175	114153	3368.61	3484.86	3881.42	3959.78	5089.79	4073.11	4766.82	7462.64	0.21:0.22:0.17:0.09:0.26:0.25:6.61:6.23:0.18:0.19:0.21:0.22:0.28:0.22:0.26:0.41	3128.61	61169.9	4057.58	5348.09	0.17:3.32:0.22:0.29	99987	Desmocollin-1 OS=Homo sapiens OX=9606 GN=DSC1 PE=1 SV=2
769	TRUE	Q9NPF4|OSGEP_HUMAN	9.17	22.39	5	5	Oxidation (M)	345.62	785.649	158.865	2064.74	963.966	2332.18	3950.88	506.7	2822.97	2939.54	948.793	879.347	2209.18	1431.25	2755.44	3695.07	0.19:0.44:0.09:1.15:0.54:1.30:2.20:0.28:1.57:1.63:0.53:0.49:1.23:0.80:1.53:2.05	838.718	1938.43	1897.66	2522.73	0.47:1.08:1.05:1.40	36427	Probable tRNA N6-adenosine threonylcarbamoyltransferase OS=Homo sapiens OX=9606 GN=OSGEP PE=1 SV=1
159	TRUE	P20930|FILA_HUMAN	17.93	2.91	11	11	Oxidation (M)	704.247	753.553	837.965	933.974	1922.41	1767.17	45687.8	50448	838.39	1348.48	1172.29	1390.76	2504.03	2064.58	1686.51	1980.56	0.10:0.10:0.12:0.13:0.27:0.24:6.30:6.96:0.12:0.19:0.16:0.19:0.35:0.28:0.23:0.27	882.642	25165.3	1289.19	2202.74	0.12:3.41:0.17:0.30	435170	Filaggrin OS=Homo sapiens OX=9606 GN=FLG PE=1 SV=3
814	TRUE	P58335|ANTR2_HUMAN	16.9	7.16	5	4		473.394	639.55	749.609	799.758	101.441	259.682	261.142	195.825	3653.01	3990.46	360.527	413.666	406.594	457.361	328.986	452.587	0.56:0.76:0.89:0.94:0.12:0.31:0.31:0.23:4.32:4.71:0.43:0.49:0.48:0.54:0.39:0.53	665.578	274.056	2691.42	516.353	0.64:0.26:2.60:0.50	53666	Anthrax toxin receptor 2 OS=Homo sapiens OX=9606 GN=ANTXR2 PE=1 SV=5
423	TRUE	Q92597|NDRG1_HUMAN	7.37	26.4	7	7	Oxidation (M)	2419.49	2171.7	10213.9	9899.29	6183.46	7365.15	4002.57	4169.42	8411.42	8382.47	3371.67	2451.23	19509.3	12324.6	6992.85	9548.57	0.33:0.30:1.39:1.35:0.84:1.00:0.55:0.57:1.15:1.14:0.46:0.33:2.66:1.68:0.95:1.30	6176.08	5430.15	5654.2	12093.8	0.84:0.74:0.77:1.65	42835	Protein NDRG1 OS=Homo sapiens OX=9606 GN=NDRG1 PE=1 SV=1
664	TRUE	Q9Y487|VPP2_HUMAN	3.37	6.31	4	4		1155	110.13	131.95	116.49	110.45	104.489	109.774	910.862	558.956	715.502	118.694	2435.09	232.458	3018.54	206.704	295.322	1.79:0.17:0.20:0.18:0.17:0.16:0.17:1.41:0.87:1.11:0.18:3.77:0.36:4.68:0.32:0.46	378.393	308.894	1017.39	938.255	0.57:0.47:1.54:1.42	98082	V-type proton ATPase 116 kDa subunit a2 OS=Homo sapiens OX=9606 GN=ATP6V0A2 PE=1 SV=2
591	TRUE	Q01469|FABP5_HUMAN	19.57	30.37	4	4	Acetylation (N-term); Carbamidomethylation	211.179	254.085	358.68	358.758	852.575	1006.2	22362.3	23210	705.789	1148.73	442.056	411.811	987.733	1075.55	862.591	629.802	0.06:0.07:0.10:0.10:0.25:0.29:6.52:6.77:0.21:0.33:0.13:0.12:0.29:0.31:0.25:0.18	323.665	13885.8	677.096	888.919	0.08:3.52:0.17:0.23	15164	Fatty acid-binding protein 5 OS=Homo sapiens OX=9606 GN=FABP5 PE=1 SV=3
136	TRUE	Q86YZ3|HORN_HUMAN	4.74	6.42	12	12	Oxidation (M)	211.471	1288.65	1323.5	240.56	276.911	533.76	36977.1	35398.5	1420.74	1346.68	594.196	913.1	1596.55	526.913	1277.25	1138.7	0.04:0.24:0.25:0.05:0.05:0.10:6.96:6.66:0.27:0.25:0.11:0.17:0.30:0.10:0.24:0.21	804.556	21699.9	1326.52	1635.31	0.13:3.41:0.21:0.26	282390	Hornerin OS=Homo sapiens OX=9606 GN=HRNR PE=1 SV=2
358	TRUE	Q8WWI5|CTL1_HUMAN	17.2	19.33	11	11	Carbamidomethylation; Oxidation (M)	2653.8	2073.45	2860.64	3503.77	16458	18962.7	4045	3117	13116.5	13534.9	4942.72	4873.17	15579.8	9001.41	11002.9	12774.2	0.31:0.24:0.33:0.40:1.90:2.19:0.47:0.36:1.52:1.56:0.57:0.56:1.80:1.04:1.27:1.48	2772.91	10645.7	9116.81	12089.6	0.32:1.23:1.05:1.40	73302	Choline transporter-like protein 1 OS=Homo sapiens OX=9606 GN=SLC44A1 PE=1 SV=1
940	TRUE	Q16222|UAP1_HUMAN	47.52	7.47	3	3		117.458	117.657	115.194	115.691	98.7603	158.753	140.563	155.617	760.461	898.408	0	0	297.426	120.978	160.261	178.569	0.55:0.55:0.54:0.54:0.46:0.74:0.65:0.72:3.54:4.18:0.00:0.00:1.39:0.56:0.75:0.83	116.5	138.423	829.434	189.309	0.37:0.43:2.60:0.59	58769	UDP-N-acetylhexosamine pyrophosphorylase OS=Homo sapiens OX=9606 GN=UAP1 PE=1 SV=3
310	TRUE	O60488|ACSL4_HUMAN	4	13.5	10	7	Oxidation (M)	1748.09	1806.98	578.781	752.337	1566.97	1509.05	910.988	999.982	6162.77	6120.73	1317.23	605.571	1812.38	1250.35	852.084	1115.78	0.96:0.99:0.32:0.41:0.86:0.83:0.50:0.55:3.39:3.36:0.72:0.33:1.00:0.69:0.47:0.61	1221.55	1246.75	3902.31	1257.65	0.64:0.65:2.05:0.66	79188	Long-chain-fatty-acid--CoA ligase 4 OS=Homo sapiens OX=9606 GN=ACSL4 PE=1 SV=2
461	TRUE	Q9BQL6|FERM1_HUMAN	5.97	11.82	7	7	Oxidation (M)	384.012	360	659.916	642.273	1414.5	1790.64	518.302	350.333	2450.11	1120.58	499.867	919.879	1636.62	771.35	990.015	814.319	0.40:0.38:0.69:0.67:1.48:1.87:0.54:0.37:2.56:1.17:0.52:0.96:1.71:0.81:1.03:0.85	511.55	1018.45	1247.61	1053.08	0.53:1.06:1.30:1.10	77437	Fermitin family homolog 1 OS=Homo sapiens OX=9606 GN=FERMT1 PE=1 SV=1
508	TRUE	P17706|PTN2_HUMAN	6.64	22.65	7	7	Oxidation (M)	1001.16	970.886	1125.61	592.919	451.511	766.269	860.643	946.905	2022.87	792.892	412.07	382.429	1314.38	1874.04	914.012	1607.44	1.00:0.97:1.12:0.59:0.45:0.76:0.86:0.94:2.02:0.79:0.41:0.38:1.31:1.87:0.91:1.60	922.644	756.332	902.564	1427.47	0.92:0.75:0.90:1.42	48473	Tyrosine-protein phosphatase non-receptor type 2 OS=Homo sapiens OX=9606 GN=PTPN2 PE=1 SV=2
5	TRUE	P04264|K2C1_HUMAN	14.4	69.1	119	103	Acetylation (N-term); Carbamidomethylation; Oxidation (M)	316242	324626	376535	383534	445965	465137	1.76e+06	1.76537e+06	396023	386039	318917	316271	362955	271792	595813	641732	0.55:0.57:0.66:0.67:0.78:0.82:3.09:3.09:0.69:0.68:0.56:0.55:0.64:0.48:1.04:1.12	350234	1.10912e+06	354312	468073	0.61:1.94:0.62:0.82	66039	Keratin, type II cytoskeletal 1 OS=Homo sapiens OX=9606 GN=KRT1 PE=1 SV=6
261	TRUE	P53985|MOT1_HUMAN	4.06	14.6	12	12	Oxidation (M)	24332.5	28581.1	54891	53590	98174.6	112550	22127.1	19185	95832.9	90591.7	46651.6	46795.4	102832	57643.5	58228.1	74405.6	0.39:0.46:0.89:0.87:1.59:1.83:0.36:0.31:1.55:1.47:0.76:0.76:1.67:0.94:0.94:1.21	40348.6	63009.2	69967.9	73277.2	0.65:1.02:1.13:1.19	53944	Monocarboxylate transporter 1 OS=Homo sapiens OX=9606 GN=SLC16A1 PE=1 SV=3
777	TRUE	P25445|TNR6_HUMAN	21.17	13.43	4	4		58.9004	0	77.1674	74.8389	291.579	297.328	68.7614	91.3384	835.728	919.189	0	0	328.364	0	105.925	256.352	0.28:0.00:0.36:0.35:1.37:1.40:0.32:0.43:3.93:4.32:0.00:0.00:1.54:0.00:0.50:1.20	70.3022	228.008	877.458	269.172	0.19:0.63:2.43:0.75	37732	Tumor necrosis factor receptor superfamily member 6 OS=Homo sapiens OX=9606 GN=FAS PE=1 SV=1
754	TRUE	P07093|GDN_HUMAN	28.15	11.56	5	4		130.547	153.224	486.575	647.901	0	0	53.4164	0	52.6078	0	61.2686	54.5964	148.97	112.358	73.3253	0	1.06:1.24:3.94:5.25:0.00:0.00:0.43:0.00:0.43:0.00:0.50:0.44:1.21:0.91:0.59:0.00	462.733	53.4164	56.1576	146.212	2.58:0.30:0.31:0.81	44002	Glia-derived nexin OS=Homo sapiens OX=9606 GN=SERPINE2 PE=1 SV=1
282	TRUE	P63092|GNAS2_HUMAN	6.34	33.5	11	11	Oxidation (M)	845.09	4306.78	2286.38	4822.79	9727.17	10107.6	3117.49	3048.02	10439.6	11045.6	1853.47	1848.82	9113.29	6679.76	6817.61	8376.32	0.14:0.73:0.39:0.82:1.65:1.71:0.53:0.52:1.77:1.87:0.31:0.31:1.54:1.13:1.16:1.42	3065.26	6500.07	6296.86	7746.74	0.52:1.10:1.07:1.31	45665	Guanine nucleotide-binding protein G(s) subunit alpha isoforms short OS=Homo sapiens OX=9606 GN=GNAS PE=1 SV=1
282	TRUE	Q5JWF2|GNAS1_HUMAN	6.34	12.73	11	11	Oxidation (M)	845.09	4306.78	2286.38	4822.79	9727.17	10107.6	3117.49	3048.02	10439.6	11045.6	1853.47	1848.82	9113.29	6679.76	6817.61	8376.32	0.14:0.73:0.39:0.82:1.65:1.71:0.53:0.52:1.77:1.87:0.31:0.31:1.54:1.13:1.16:1.42	3065.26	6500.07	6296.86	7746.74	0.52:1.10:1.07:1.31	111025	Guanine nucleotide-binding protein G(s) subunit alpha isoforms XLas OS=Homo sapiens OX=9606 GN=GNAS PE=1 SV=2
801	TRUE	Q8IZH2|XRN1_HUMAN	24.45	3.11	4	4	Oxidation (M)	197.478	146.984	273.706	246.606	242.27	288.434	403.617	325.398	2220.03	1977.63	819.032	30438.7	1304.9	342.953	1155.23	1832.08	0.07:0.06:0.10:0.09:0.09:0.11:0.15:0.12:0.84:0.75:0.31:11.54:0.49:0.13:0.44:0.69	250.531	354.337	8863.85	1158.79	0.09:0.13:3.34:0.44	194107	5'-3' exoribonuclease 1 OS=Homo sapiens OX=9606 GN=XRN1 PE=1 SV=1
98	TRUE	P23634|AT2B4_HUMAN	24.34	17.97	27	17	Carbamidomethylation; Oxidation (M)	3529.69	3441.33	17259.7	17506.1	20547.9	24945.4	15665.8	15621.6	4803.74	5289.85	1511.99	1299.12	16132.5	9152.28	19505.9	21898.9	0.29:0.28:1.39:1.41:1.66:2.01:1.27:1.26:0.39:0.43:0.12:0.10:1.30:0.74:1.58:1.77	10434.2	19195.2	3226.18	16672.4	0.84:1.55:0.26:1.35	137920	Plasma membrane calcium-transporting ATPase 4 OS=Homo sapiens OX=9606 GN=ATP2B4 PE=1 SV=2
808	TRUE	P63098|CANB1_HUMAN	2.75	23.53	3	3		459.667	368.099	858.332	719.318	649.769	608.356	1038.84	1031.08	1697.04	1297.95	306.641	367.039	1397	854.796	865.615	857.981	0.55:0.44:1.03:0.86:0.78:0.73:1.24:1.23:2.03:1.55:0.37:0.44:1.67:1.02:1.04:1.03	601.354	832.013	917.168	993.848	0.72:1.00:1.10:1.19	19300	Calcineurin subunit B type 1 OS=Homo sapiens OX=9606 GN=PPP3R1 PE=1 SV=2
577	TRUE	Q99805|TM9S2_HUMAN	9.17	15.69	8	8	Carbamidomethylation; Oxidation (M)	4047.02	3367.25	3992.95	5072.11	4318.12	4488.42	4318.7	4572.56	1802.77	4039.88	2121.3	2254.95	6209.53	1696.06	4190.31	5419.21	1.05:0.87:1.03:1.31:1.12:1.16:1.12:1.18:0.47:1.04:0.55:0.58:1.60:0.44:1.08:1.40	4119.83	4424.45	2554.72	4378.78	1.06:1.14:0.66:1.13	75776	Transmembrane 9 superfamily member 2 OS=Homo sapiens OX=9606 GN=TM9SF2 PE=1 SV=1
620	TRUE	Q93050|VPP1_HUMAN	6.55	10.87	6	6	Oxidation (M)	774.005	805.086	913.63	1259.82	1116.88	1211.83	1564.41	1289.25	1577.52	1717.2	712.357	362.649	1848.59	822.538	2110.13	2792.87	0.59:0.62:0.70:0.97:0.86:0.93:1.20:0.99:1.21:1.32:0.55:0.28:1.42:0.63:1.62:2.14	938.134	1295.59	1092.43	1893.53	0.72:0.99:0.84:1.45	96413	V-type proton ATPase 116 kDa subunit a1 OS=Homo sapiens OX=9606 GN=ATP6V0A1 PE=1 SV=3
700	TRUE	Q08209|PP2BA_HUMAN	2.85	11.52	5	5	Oxidation (M)	3215.74	707.999	2097.88	1345.09	1788.76	2288.86	972.028	1233.78	2238.59	2107.07	2128.21	1502.62	2813.08	2001.59	2075.81	1895.42	1.69:0.37:1.10:0.71:0.94:1.20:0.51:0.65:1.18:1.11:1.12:0.79:1.48:1.05:1.09:1.00	1881.27	1570.86	1994.12	2196.47	0.98:0.82:1.04:1.15	58688	Serine/threonine-protein phosphatase 2B catalytic subunit alpha isoform OS=Homo sapiens OX=9606 GN=PPP3CA PE=1 SV=1
842	TRUE	P27701|CD82_HUMAN	15.88	13.86	3	3	Oxidation (M)	713.687	2304.42	5624.17	1456.14	17014.2	18183.6	2544.71	2259.27	1148.24	1435.82	1590.81	366.985	8261.67	4494.1	3491.66	4055.41	0.15:0.49:1.20:0.31:3.63:3.88:0.54:0.48:0.25:0.31:0.34:0.08:1.76:0.96:0.75:0.87	2524.61	10000.4	1135.46	5075.71	0.54:2.13:0.24:1.08	29626	CD82 antigen OS=Homo sapiens OX=9606 GN=CD82 PE=1 SV=1
153	TRUE	P98160|PGBM_HUMAN	8.89	5.65	19	19	Oxidation (M)	1205.38	855.756	4784.87	4630.13	923.625	968.777	1183.16	979.239	690.609	818.274	890.381	694.626	569.304	850.867	2468.93	2368.14	0.78:0.55:3.08:2.98:0.59:0.62:0.76:0.63:0.44:0.53:0.57:0.45:0.37:0.55:1.59:1.52	2869.03	1013.7	773.473	1564.31	1.84:0.65:0.50:1.01	468830	Basement membrane-specific heparan sulfate proteoglycan core protein OS=Homo sapiens OX=9606 GN=HSPG2 PE=1 SV=4
95	TRUE	P04406|G3P_HUMAN	15.43	51.34	18	18	Carbamidomethylation; Oxidation (M)	10267.2	10163	12669.4	8248.4	12579.7	16960.1	119344	109868	102788	92352.2	21230.9	18755.8	67692.4	48352.1	60255.8	66538.6	0.21:0.21:0.26:0.17:0.26:0.35:2.45:2.26:2.11:1.90:0.44:0.39:1.39:0.99:1.24:1.37	10337	64687.9	58781.6	60709.7	0.21:1.33:1.21:1.25	36053	Glyceraldehyde-3-phosphate dehydrogenase OS=Homo sapiens OX=9606 GN=GAPDH PE=1 SV=3
410	TRUE	P01889|HLAB_HUMAN	42.16	10.5	9	3		426.309	1606.98	1998.92	1879.11	17247.2	20287.4	5400.36	5390.04	2548.45	2569.78	612.155	763.941	31979.8	19058.3	17754.5	24797	0.04:0.17:0.21:0.19:1.79:2.10:0.56:0.56:0.26:0.27:0.06:0.08:3.32:1.98:1.84:2.57	1687.19	12081.3	1764.82	23853.8	0.17:1.23:0.18:2.42	40460	HLA class I histocompatibility antigen, B alpha chain OS=Homo sapiens OX=9606 GN=HLA-B PE=1 SV=3
503	TRUE	P05120|PAI2_HUMAN	9.58	20	8	8	Oxidation (M)	36755	35988.7	18535.4	16729.5	22207.8	7047.4	5329.97	4976.9	12650.4	11193.5	45195.2	48466.2	20316.9	41460.8	25685.5	7344.71	1.63:1.60:0.82:0.74:0.99:0.31:0.24:0.22:0.56:0.50:2.01:2.15:0.90:1.84:1.14:0.33	27002.2	9890.52	29376.3	23702	1.20:0.44:1.31:1.05	46596	Plasminogen activator inhibitor 2 OS=Homo sapiens OX=9606 GN=SERPINB2 PE=1 SV=2
818	TRUE	P61225|RAP2B_HUMAN	14.03	22.95	5	3		2635.62	1345.4	5121.03	5140.12	14617.8	15437.1	7265.76	6557.68	5997.35	6052.87	2590.46	2017.76	4581.25	3048.12	7601.02	8380.03	0.43:0.22:0.83:0.84:2.38:2.51:1.18:1.07:0.98:0.98:0.42:0.33:0.74:0.50:1.24:1.36	3560.54	10969.6	4164.61	5902.61	0.58:1.78:0.68:0.96	20504	Ras-related protein Rap-2b OS=Homo sapiens OX=9606 GN=RAP2B PE=1 SV=1
121	TRUE	P20020|AT2B1_HUMAN	10.51	13.11	23	12	Carbamidomethylation; Oxidation (M)	2969.8	3134.86	7339.31	7058.89	3542.32	1965.92	2118.38	2227.85	3298.14	2764.85	931.681	1174.06	5369.99	1535.75	4011.19	3055.08	0.91:0.96:2.24:2.15:1.08:0.60:0.65:0.68:1.01:0.84:0.28:0.36:1.64:0.47:1.22:0.93	5125.72	2463.61	2042.18	3493	1.56:0.75:0.62:1.06	134685	Plasma membrane calcium-transporting ATPase 1 OS=Homo sapiens OX=9606 GN=ATP2B1 PE=1 SV=4
402	TRUE	Q8TF72|SHRM3_HUMAN	9.65	3.96	6	6		179.853	173.804	268.141	481.706	194.862	2704.23	298.338	277.898	1848.76	1942.91	337.824	18021.3	1030.39	68.6614	397.635	628.826	0.10:0.10:0.15:0.27:0.11:1.50:0.17:0.15:1.03:1.08:0.19:9.99:0.57:0.04:0.22:0.35	443.769	2732.92	5936.78	615.798	0.18:1.12:2.44:0.25	216857	Protein Shroom3 OS=Homo sapiens OX=9606 GN=SHROOM3 PE=1 SV=2
319	TRUE	Q8IWA5|CTL2_HUMAN	14.92	19.26	13	13	Acetylation (N-term); Carbamidomethylation	2241.28	4121.42	4121.16	5090.74	24311	29024.2	5101.72	4781.16	16957.5	17577.3	4708.69	4640.84	24452.4	19678.1	13938.5	15607.5	0.18:0.34:0.34:0.41:1.98:2.37:0.42:0.39:1.38:1.43:0.38:0.38:1.99:1.60:1.14:1.27	3893.65	15804.5	10971.1	18419.1	0.32:1.29:0.89:1.50	80124	Choline transporter-like protein 2 OS=Homo sapiens OX=9606 GN=SLC44A2 PE=1 SV=3
655	TRUE	P04156|PRIO_HUMAN	1.93	17.79	5	5	Carbamidomethylation; Oxidation (M)	2044.81	1467.49	3945.11	3988.42	2941.38	5610.25	2145.33	1686.79	22598.1	16133	863.556	1048.59	6772.14	2273.63	494.525	702.607	0.44:0.31:0.84:0.85:0.63:1.20:0.46:0.36:4.84:3.45:0.18:0.22:1.45:0.49:0.11:0.15	2861.46	3234.81	14739.5	2681.92	0.49:0.55:2.51:0.46	27661	Major prion protein OS=Homo sapiens OX=9606 GN=PRNP PE=1 SV=1
981	TRUE	P13473|LAMP2_HUMAN	12.39	7.07	3	3		764.598	1143.75	345.118	677.652	3892	4492.83	827.435	1724.94	5205.66	4642.29	905.561	1124.4	2302.35	2008.74	2144.47	2200.99	0.36:0.53:0.16:0.32:1.81:2.09:0.38:0.80:2.42:2.16:0.42:0.52:1.07:0.93:1.00:1.02	732.779	2734.3	2969.48	2164.14	0.34:1.27:1.38:1.01	44961	Lysosome-associated membrane glycoprotein 2 OS=Homo sapiens OX=9606 GN=LAMP2 PE=1 SV=2
864	TRUE	O14745|NHRF1_HUMAN	9.54	10.89	3	3		239.302	142.74	359.167	346.901	1320.61	1950.88	722.551	779.231	1941.53	2182.74	209.257	276.318	1632.69	251.945	1100.39	1283.02	0.26:0.15:0.39:0.38:1.43:2.12:0.78:0.85:2.11:2.37:0.23:0.30:1.77:0.27:1.19:1.39	294.933	1193.32	1294.47	1067.01	0.31:1.24:1.34:1.11	38868	Na(+)/H(+) exchange regulatory cofactor NHE-RF1 OS=Homo sapiens OX=9606 GN=SLC9A3R1 PE=1 SV=4
373	TRUE	Q96QA5|GSDMA_HUMAN	3.4	36.18	11	11	Oxidation (M)	305.363	286.045	846.609	406.919	273.623	284.575	5296.57	5141.11	832.615	729.348	654.769	718.901	476.938	660.526	1167.58	743.551	0.26:0.24:0.72:0.35:0.23:0.24:4.50:4.37:0.71:0.62:0.56:0.61:0.41:0.56:0.99:0.63	461.234	3295.29	733.909	762.15	0.35:2.51:0.56:0.58	49365	Gasdermin-A OS=Homo sapiens OX=9606 GN=GSDMA PE=1 SV=4
588	TRUE	P51617|IRAK1_HUMAN	14.43	10.96	6	6		406.321	341.681	210.673	173.131	294.349	324.239	1574.67	2342.18	844.957	1050.83	564.258	404.023	1186.56	831.313	1049.04	3188.12	0.44:0.37:0.23:0.19:0.32:0.35:1.70:2.53:0.91:1.14:0.61:0.44:1.28:0.90:1.14:3.45	473.111	1835.15	907.542	1563.76	0.40:1.54:0.76:1.31	76537	Interleukin-1 receptor-associated kinase 1 OS=Homo sapiens OX=9606 GN=IRAK1 PE=1 SV=2
499	TRUE	Q8N271|PROM2_HUMAN	28.62	8.39	6	6		565.902	293.001	936.606	1416.92	4449.78	4627.47	1475.17	1650.13	842.722	349.095	537.87	297.958	2345.34	1764.74	2351.34	1548.88	0.36:0.18:0.59:0.89:2.80:2.91:0.93:1.04:0.53:0.22:0.34:0.19:1.47:1.11:1.48:0.97	826.782	3050.64	585.536	2002.57	0.51:1.89:0.36:1.24	91883	Prominin-2 OS=Homo sapiens OX=9606 GN=PROM2 PE=1 SV=1
188	TRUE	Q9H223|EHD4_HUMAN	21.34	29.94	17	13	Oxidation (M)	3949.6	768.019	1681.5	1673.09	14831.8	11101.6	4011.9	4165.56	15304.2	8659.47	5046.65	4618.9	5709.89	5257.93	7323.44	7285.86	0.62:0.12:0.27:0.26:2.34:1.75:0.63:0.66:2.42:1.37:0.80:0.73:0.90:0.83:1.16:1.15	2316.34	8527.7	8407.3	6394.28	0.36:1.33:1.31:1.00	61175	EH domain-containing protein 4 OS=Homo sapiens OX=9606 GN=EHD4 PE=1 SV=1
250	TRUE	O94973|AP2A2_HUMAN	5.14	11.08	12	7	Oxidation (M)	1618.27	1653.3	961.296	1069.07	1269.07	1826.73	632.652	1041.58	3117.11	3642.48	529686	521.341	3176.09	976.971	1526.99	964.555	0.05:0.05:0.03:0.03:0.04:0.05:0.02:0.03:0.09:0.11:15.31:0.02:0.09:0.03:0.04:0.03	1401.25	1192.51	134242	1661.15	0.04:0.03:3.88:0.05	103960	AP-2 complex subunit alpha-2 OS=Homo sapiens OX=9606 GN=AP2A2 PE=1 SV=2
220	TRUE	Q08188|TGM3_HUMAN	7.34	28.14	16	16	Oxidation (M)	510.765	426.712	1016.01	1068.42	967.045	861.476	21035.7	18755.4	4170.15	5155.89	966.043	684.377	2516.26	966.297	2227.87	2624.52	0.13:0.11:0.25:0.27:0.24:0.22:5.26:4.69:1.04:1.29:0.24:0.17:0.63:0.24:0.56:0.66	755.478	11891	3362.73	2083.74	0.17:2.63:0.74:0.46	76632	Protein-glutamine gamma-glutamyltransferase E OS=Homo sapiens OX=9606 GN=TGM3 PE=1 SV=4
778	TRUE	P48029|SC6A8_HUMAN	3.16	7.87	4	4		1676.88	1245.73	3497.24	3450.25	1831.13	3429.91	989.891	1009.51	2980.95	2124.6	2274.24	2099.44	2641.39	1328.04	4137.77	3356.83	0.70:0.52:1.47:1.45:0.77:1.44:0.42:0.42:1.25:0.89:0.96:0.88:1.11:0.56:1.74:1.41	2467.52	1815.11	2369.81	2866.01	1.04:0.76:1.00:1.20	70523	Sodium- and chloride-dependent creatine transporter 1 OS=Homo sapiens OX=9606 GN=SLC6A8 PE=1 SV=1
622	TRUE	Q96CW1|AP2M1_HUMAN	1.31	13.79	5	5	Oxidation (M)	1661.75	4158.48	2105.03	3489.94	2831.61	10022.1	3228.34	2382.19	8579.55	9364.65	889.224	1438.28	5228.58	2567.63	5433.31	6715.35	0.38:0.95:0.48:0.80:0.65:2.29:0.74:0.54:1.96:2.14:0.20:0.33:1.19:0.59:1.24:1.53	2853.8	4616.07	5067.93	4986.22	0.65:1.05:1.16:1.14	49655	AP-2 complex subunit mu OS=Homo sapiens OX=9606 GN=AP2M1 PE=1 SV=2
378	TRUE	P08754|GNAI3_HUMAN	4	19.77	10	5	Oxidation (M)	1524.49	2026.01	1765.19	2066.28	4813.99	5685.61	1633.44	1108.51	4318.93	3844.97	904.478	2024.41	3987.55	4355.66	2999.36	3340.43	0.53:0.70:0.61:0.71:1.66:1.96:0.56:0.38:1.49:1.33:0.31:0.70:1.38:1.50:1.03:1.15	1845.49	3310.39	2773.2	3670.75	0.64:1.14:0.96:1.27	40532	Guanine nucleotide-binding protein G(i) subunit alpha OS=Homo sapiens OX=9606 GN=GNAI3 PE=1 SV=3
753	TRUE	O75131|CPNE3_HUMAN	8.53	7.08	4	4		622.215	2256.36	1274.1	1115.95	449.636	701.733	484.023	573.228	3131.41	3028.25	855.901	444.624	1018.19	590.171	771.353	739.583	0.55:2.00:1.13:0.99:0.40:0.62:0.43:0.51:2.77:2.68:0.76:0.39:0.90:0.52:0.68:0.66	1317.16	552.155	1865.05	779.824	1.17:0.49:1.65:0.69	60131	Copine-3 OS=Homo sapiens OX=9606 GN=CPNE3 PE=1 SV=1
1120	TRUE	Q6P1M3|L2GL2_HUMAN	0.77	2.75	2	2		478.726	478.924	863.533	1165.71	632.13	906.954	330.567	552.387	769.286	775.545	664.988	751.442	311.968	1817.02	1020	568.111	0.63:0.63:1.14:1.54:0.84:1.20:0.44:0.73:1.02:1.03:0.88:0.99:0.41:2.41:1.35:0.75	929.939	685.068	740.315	929.273	1.13:0.83:0.90:1.13	113448	LLGL scribble cell polarity complex component 2 OS=Homo sapiens OX=9606 GN=LLGL2 PE=1 SV=2
683	TRUE	P0DP23|CALM1_HUMAN	2.2	32.21	5	5	Oxidation (M)	1081.88	1256.37	855.957	848.725	374.006	265.902	9012.09	9244.31	1449.84	1239.5	685.752	575.983	1937.93	1212.18	2976.16	3041.12	0.48:0.56:0.38:0.38:0.17:0.12:4.00:4.10:0.64:0.55:0.30:0.26:0.86:0.54:1.32:1.35	1010.73	4924.78	987.769	2291.85	0.44:2.14:0.43:0.99	16838	Calmodulin-1 OS=Homo sapiens OX=9606 GN=CALM1 PE=1 SV=1
683	TRUE	P0DP24|CALM2_HUMAN	2.2	32.21	5	5	Oxidation (M)	1081.88	1256.37	855.957	848.725	374.006	265.902	9012.09	9244.31	1449.84	1239.5	685.752	575.983	1937.93	1212.18	2976.16	3041.12	0.48:0.56:0.38:0.38:0.17:0.12:4.00:4.10:0.64:0.55:0.30:0.26:0.86:0.54:1.32:1.35	1010.73	4924.78	987.769	2291.85	0.44:2.14:0.43:0.99	16838	Calmodulin-2 OS=Homo sapiens OX=9606 GN=CALM2 PE=1 SV=1
683	TRUE	P0DP25|CALM3_HUMAN	2.2	32.21	5	5	Oxidation (M)	1081.88	1256.37	855.957	848.725	374.006	265.902	9012.09	9244.31	1449.84	1239.5	685.752	575.983	1937.93	1212.18	2976.16	3041.12	0.48:0.56:0.38:0.38:0.17:0.12:4.00:4.10:0.64:0.55:0.30:0.26:0.86:0.54:1.32:1.35	1010.73	4924.78	987.769	2291.85	0.44:2.14:0.43:0.99	16838	Calmodulin-3 OS=Homo sapiens OX=9606 GN=CALM3 PE=1 SV=1
695	TRUE	P60953|CDC42_HUMAN	26.18	31.41	6	6	Carbamidomethylation	744.897	1009.73	3685.2	3439.38	12622.7	16004.1	10836	10369.4	6211.73	6399.64	2145.56	2640.8	5297.08	3630.1	8990.69	8271.17	0.12:0.16:0.58:0.54:1.97:2.50:1.69:1.62:0.97:1.00:0.34:0.41:0.83:0.57:1.41:1.29	2308.43	12458	5014.83	6547.26	0.35:1.89:0.76:0.99	21259	Cell division control protein 42 homolog OS=Homo sapiens OX=9606 GN=CDC42 PE=1 SV=2
669	TRUE	P09601|HMOX1_HUMAN	43.88	17.36	5	4	Oxidation (M)	0	0	0	0	0	63.7706	1875.83	1731.43	483.6	374.833	0	0	136.374	71.6256	378.062	189.421	0.00:0.00:0.00:0.00:0.00:0.19:5.66:5.22:1.46:1.13:0.00:0.00:0.41:0.22:1.14:0.57	0	1522.35	429.217	279.094	0.00:2.73:0.77:0.50	32819	Heme oxygenase 1 OS=Homo sapiens OX=9606 GN=HMOX1 PE=1 SV=1
897	TRUE	Q9H0U3|MAGT1_HUMAN	12.97	13.13	4	4	Oxidation (M)	3270.08	3949.92	3286.81	1660.96	2913.13	2073.81	1469.15	3817.33	4787.4	3560.76	4563.35	4031.44	1681.05	2679.7	2237.07	2381.08	1.08:1.31:1.09:0.55:0.96:0.69:0.49:1.26:1.58:1.18:1.51:1.33:0.56:0.89:0.74:0.79	3041.94	2568.36	4235.74	2244.73	1.01:0.85:1.40:0.74	38037	Magnesium transporter protein 1 OS=Homo sapiens OX=9606 GN=MAGT1 PE=1 SV=1
850	TRUE	P18827|SDC1_HUMAN	29.47	15.81	4	4		1580.51	1105.87	4020.1	2350.16	2568.55	3305.65	2833.01	2053.14	1727.2	1485.46	717.751	660.633	7056.6	3700.17	5152.87	5154.99	0.56:0.39:1.41:0.83:0.90:1.16:1.00:0.72:0.61:0.52:0.25:0.23:2.48:1.30:1.81:1.81	2264.16	2690.09	1147.76	5266.16	0.80:0.95:0.40:1.85	32462	Syndecan-1 OS=Homo sapiens OX=9606 GN=SDC1 PE=1 SV=3
830	TRUE	P61421|VA0D1_HUMAN	3.67	21.08	5	5		700.464	760.472	1559.11	995.185	2460.09	3355.51	1509.69	1527.25	2907.44	2992.17	565.949	1284.15	3710.55	1097.77	536.257	3138.6	0.39:0.42:0.86:0.55:1.35:1.84:0.83:0.84:1.60:1.65:0.31:0.71:2.04:0.60:0.29:1.73	1003.81	2213.13	1937.43	2120.8	0.55:1.22:1.07:1.17	40329	V-type proton ATPase subunit d 1 OS=Homo sapiens OX=9606 GN=ATP6V0D1 PE=1 SV=1
690	TRUE	O75083|WDR1_HUMAN	3.92	19.14	6	6		827.947	561.764	2876.07	3162.05	2115.28	871.984	2799.63	1914.05	5100.3	4070.77	1786.43	1739.38	3078.91	1356.08	603.965	1236.27	0.39:0.26:1.35:1.48:0.99:0.41:1.31:0.90:2.39:1.91:0.84:0.82:1.44:0.64:0.28:0.58	1856.96	1925.24	3174.22	1568.81	0.87:0.90:1.49:0.74	66194	WD repeat-containing protein 1 OS=Homo sapiens OX=9606 GN=WDR1 PE=1 SV=4
587	TRUE	Q14108|SCRB2_HUMAN	30.82	23.43	7	7	Oxidation (M)	772.188	1082.25	858.268	1043.05	6112.02	7986.57	5419.17	5736.88	1412.5	1855.25	2802.81	2477.66	7159.6	3598.61	1179.86	1380.14	0.24:0.34:0.27:0.33:1.92:2.51:1.70:1.80:0.44:0.58:0.88:0.78:2.25:1.13:0.37:0.43	938.937	6313.66	2340.71	3329.55	0.29:1.95:0.72:1.03	54290	Lysosome membrane protein 2 OS=Homo sapiens OX=9606 GN=SCARB2 PE=1 SV=2
736	TRUE	Q99808|S29A1_HUMAN	5.28	10.96	4	4		1598.38	1872.87	4388.98	4142.07	2613.35	4272.08	1138.61	1107.29	5432.31	4177.33	11065.6	1030.72	1967.64	612.338	1412.38	2877.3	0.51:0.60:1.41:1.33:0.84:1.38:0.37:0.36:1.75:1.34:3.56:0.33:0.63:0.20:0.45:0.93	3033.06	2313.28	6295	1766.11	0.90:0.69:1.88:0.53	50219	Equilibrative nucleoside transporter 1 OS=Homo sapiens OX=9606 GN=SLC29A1 PE=1 SV=3
118	TRUE	P54652|HSP72_HUMAN	14.78	18	27	9	Oxidation (M)	935.924	934.546	1092.1	980.665	1329.27	1231.28	7237.78	7532.12	2019.32	1263.97	943.598	810.871	2936.32	2765.97	3014.32	1795.47	0.41:0.41:0.47:0.43:0.58:0.53:3.14:3.27:0.88:0.55:0.41:0.35:1.28:1.20:1.31:0.78	985.808	4332.61	1259.44	2628.02	0.43:1.88:0.55:1.14	70021	Heat shock-related 70 kDa protein 2 OS=Homo sapiens OX=9606 GN=HSPA2 PE=1 SV=1
353	TRUE	P18206|VINC_HUMAN	4.37	14.9	11	11	Oxidation (M)	296.032	1458.95	591.503	748.562	863.18	455.827	1994.09	2199.92	726.053	1036.72	1338.03	1533.39	1809.71	766.242	1360.9	1514.18	0.25:1.25:0.51:0.64:0.74:0.39:1.71:1.88:0.62:0.89:1.15:1.31:1.55:0.66:1.16:1.30	773.761	1378.25	1158.55	1362.76	0.66:1.18:0.99:1.17	123799	Vinculin OS=Homo sapiens OX=9606 GN=VCL PE=1 SV=4
203	TRUE	Q14574|DSC3_HUMAN	15.41	20.31	16	15	Oxidation (M)	455.323	516.547	934.967	958.041	683.707	916.518	13508.1	11818.4	4473.06	5741.11	1325.06	1124.87	8207.8	4913.12	7366.75	7421.11	0.10:0.12:0.21:0.22:0.16:0.21:3.07:2.69:1.02:1.31:0.30:0.26:1.87:1.12:1.68:1.69	716.22	6731.69	3166.03	6977.19	0.16:1.53:0.72:1.59	99969	Desmocollin-3 OS=Homo sapiens OX=9606 GN=DSC3 PE=1 SV=3
256	TRUE	P46821|MAP1B_HUMAN	1.13	4.86	9	9	Oxidation (M)	1427.95	1824.64	1102.53	943.939	1703.61	2093.96	1001.03	1190.62	2439.91	2125.65	433.177	750.295	1220.88	972.178	766.07	1180.44	1.08:1.38:0.83:0.71:1.29:1.58:0.76:0.90:1.84:1.61:0.33:0.57:0.92:0.73:0.58:0.89	1324.77	1497.3	1437.26	1034.89	1.00:1.13:1.09:0.78	270634	Microtubule-associated protein 1B OS=Homo sapiens OX=9606 GN=MAP1B PE=1 SV=2
471	TRUE	P29966|MARCS_HUMAN	0.67	44.58	8	8		1648.6	603.422	853.426	621.534	1485.68	1460.78	740.989	634.992	1892.15	1685.28	493.455	360.675	1643.94	744.955	1106.16	1288.85	1.53:0.56:0.79:0.58:1.38:1.35:0.69:0.59:1.75:1.56:0.46:0.33:1.52:0.69:1.03:1.19	931.746	1080.61	1836.09	1389.72	0.71:0.83:1.40:1.06	31555	Myristoylated alanine-rich C-kinase substrate OS=Homo sapiens OX=9606 GN=MARCKS PE=1 SV=4
465	TRUE	P04040|CATA_HUMAN	5.83	18.41	7	7	Carbamidomethylation	754.018	831.543	925.219	887.347	608.629	1773.62	6536.08	5312.69	2285.69	2679.74	522.255	424.723	1154.73	1041	2401.95	3014.61	0.39:0.43:0.48:0.46:0.31:0.91:3.36:2.73:1.17:1.38:0.27:0.22:0.59:0.53:1.23:1.55	901.401	3622.68	1694.67	1903.07	0.44:1.78:0.83:0.94	59756	Catalase OS=Homo sapiens OX=9606 GN=CAT PE=1 SV=3
245	TRUE	P04083|ANXA1_HUMAN	24.02	54.91	16	16	Oxidation (M)	1590.11	2213.89	5317.84	5775.21	9556.56	10863.8	56066.1	55582.4	11456.1	10515.3	20915.2	20332.8	13777.8	10587.9	10343.2	12308.1	0.10:0.14:0.33:0.36:0.59:0.68:3.49:3.46:0.71:0.65:1.30:1.26:0.86:0.66:0.64:0.77	3724.26	33017.2	15804.8	11754.3	0.23:2.05:0.98:0.73	38714	Annexin A1 OS=Homo sapiens OX=9606 GN=ANXA1 PE=1 SV=2
379	TRUE	Q96FQ6|S10AG_HUMAN	10.07	64.08	8	8	Oxidation (M)	8739.6	8634.42	16477.4	16652.2	43543.4	57428.5	25949.8	24044.6	39903.2	44779.8	5536.63	6713.79	46860.3	18965	34819.7	36634.4	0.32:0.32:0.61:0.61:1.60:2.11:0.95:0.88:1.47:1.64:0.20:0.25:1.72:0.70:1.28:1.35	12625.9	37741.6	24233.4	34319.9	0.46:1.39:0.89:1.26	11801	Protein S100-A16 OS=Homo sapiens OX=9606 GN=S100A16 PE=1 SV=1
208	TRUE	P14735|IDE_HUMAN	10.26	20.31	18	18	Oxidation (M)	164.153	156.608	253.606	305.83	217.044	256.338	3405.07	3787.97	1010.74	1144.89	705.382	489.61	715.525	576.438	778.687	938.739	0.18:0.17:0.27:0.33:0.23:0.28:3.65:4.07:1.08:1.23:0.76:0.53:0.77:0.62:0.84:1.01	249.566	2258.24	837.657	752.347	0.24:2.20:0.82:0.73	117968	Insulin-degrading enzyme OS=Homo sapiens OX=9606 GN=IDE PE=1 SV=4
380	TRUE	P12931|SRC_HUMAN	2.8	26.12	11	9	Oxidation (M)	783.527	1111.82	839.095	2699.93	1395.96	2459.82	2458.34	1062.95	2616.51	2038.71	1434.58	1364.43	1828.49	943.216	1737.79	2130.09	0.47:0.66:0.50:1.61:0.83:1.46:1.46:0.63:1.56:1.21:0.85:0.81:1.09:0.56:1.03:1.27	1358.59	1844.27	1985.42	1659.9	0.79:1.08:1.16:0.97	59835	Proto-oncogene tyrosine-protein kinase Src OS=Homo sapiens OX=9606 GN=SRC PE=1 SV=3
635	TRUE	P13928|ANXA8_HUMAN	9.22	28.44	7	7	Oxidation (M)	409.778	430.34	459.719	1152.47	806.083	645.31	4293.83	4403.83	1231.44	1545.75	1036.48	461.242	1192.57	1252.88	2377.79	1113.53	0.29:0.30:0.32:0.81:0.57:0.45:3.01:3.09:0.86:1.08:0.73:0.32:0.84:0.88:1.67:0.78	628.475	2537.26	1068.73	1484.19	0.44:1.77:0.75:1.04	36881	Annexin A8 OS=Homo sapiens OX=9606 GN=ANXA8 PE=1 SV=3
369	TRUE	Q8WUX1|S38A5_HUMAN	71.36	14.19	6	6	Acetylation (N-term); Oxidation (M)	7379.44	7413.63	13554.3	16365.5	344.235	364.662	348.716	355.263	20238.7	21031.6	7035.4	8511.77	565.628	1542.17	554.683	503.153	1.11:1.12:2.04:2.47:0.05:0.05:0.05:0.05:3.05:3.17:1.06:1.28:0.09:0.23:0.08:0.08	11178.2	353.219	14204.4	829.614	1.68:0.05:2.14:0.12	51457	Sodium-coupled neutral amino acid transporter 5 OS=Homo sapiens OX=9606 GN=SLC38A5 PE=1 SV=1
468	TRUE	Q99816|TS101_HUMAN	5.79	22.31	7	7	Oxidation (M)	2766.06	2801.39	3558.31	4254.77	4045.38	5039.89	1245.2	2160.82	2560.2	3556.94	1312.73	1206.47	3751.53	2388.08	4630.38	4221.16	0.89:0.91:1.15:1.38:1.31:1.63:0.40:0.70:0.83:1.15:0.42:0.39:1.21:0.77:1.50:1.36	3345.13	3122.82	2159.08	3747.79	1.08:1.01:0.70:1.21	43944	Tumor susceptibility gene 101 protein OS=Homo sapiens OX=9606 GN=TSG101 PE=1 SV=2
728	TRUE	Q9UK41|VPS28_HUMAN	1.64	28.05	4	4	Acetylation (N-term); Oxidation (M)	6213.23	6658.4	5946.35	6117.16	8452.19	9947.8	3219.67	3846.76	7274.85	10285.1	1526.67	2298.08	8820.31	4217.06	5793.54	5682.88	1.03:1.11:0.99:1.02:1.40:1.65:0.53:0.64:1.21:1.71:0.25:0.38:1.47:0.70:0.96:0.94	6233.78	6366.61	5346.18	6128.45	1.04:1.06:0.89:1.02	25425	Vacuolar protein sorting-associated protein 28 homolog OS=Homo sapiens OX=9606 GN=VPS28 PE=1 SV=1
1050	TRUE	Q7Z403|TMC6_HUMAN	0.98	4.47	3	3	Oxidation (M)	151.184	471.659	910.446	1039.77	661.982	1641.8	793.036	501.083	1118.2	1254.96	320.963	312.445	730.804	378.226	660.917	813.724	0.21:0.64:1.24:1.41:0.90:2.23:1.08:0.68:1.52:1.71:0.44:0.43:0.99:0.51:0.90:1.11	678.825	899.475	977.553	645.918	0.85:1.12:1.22:0.81	90045	Transmembrane channel-like protein 6 OS=Homo sapiens OX=9606 GN=TMC6 PE=1 SV=2
637	TRUE	P35613|BASI_HUMAN	15.31	17.66	5	5	Oxidation (M)	3588.65	3903.03	9085.09	9244.57	19792.9	23065.7	9441.54	9942.3	11150.4	10749.5	7070.61	7115.54	10116.4	11128.8	11012.2	12656.2	0.34:0.37:0.86:0.87:1.87:2.18:0.89:0.94:1.06:1.02:0.67:0.67:0.96:1.05:1.04:1.20	6455.34	15560.6	9021.52	11228.4	0.61:1.47:0.85:1.06	42200	Basigin OS=Homo sapiens OX=9606 GN=BSG PE=1 SV=2
922	TRUE	Q9H2H9|S38A1_HUMAN	0.72	6.57	3	3		2795.15	2695.49	3581.49	3642.14	5372.09	5869.82	1154.65	1167.47	6015.32	6144.67	898.835	1063.14	4219.15	2986.67	3584.58	3741.67	0.81:0.79:1.04:1.06:1.56:1.71:0.34:0.34:1.75:1.79:0.26:0.31:1.23:0.87:1.04:1.09	3178.57	3532.54	3678.87	3633.02	0.91:1.01:1.05:1.04	54048	Sodium-coupled neutral amino acid transporter 1 OS=Homo sapiens OX=9606 GN=SLC38A1 PE=1 SV=1
34	TRUE	P13645|K1C10_HUMAN	25.51	61.13	55	52	Acetylation (N-term); Carbamidomethylation; Oxidation (M)	105857	107967	106896	106154	212599	237210	240906	231289	164491	149295	72651.1	75030.3	209164	133225	288428	349500	0.61:0.62:0.61:0.61:1.22:1.36:1.38:1.33:0.94:0.86:0.42:0.43:1.20:0.76:1.65:2.00	106719	230501	115367	245079	0.61:1.32:0.66:1.41	58827	Keratin, type I cytoskeletal 10 OS=Homo sapiens OX=9606 GN=KRT10 PE=1 SV=6
581	TRUE	Q15286|RAB35_HUMAN	16.51	17.41	4	3	Oxidation (M)	990.509	749.981	2899.49	2871.04	6037.41	6710.51	6016.51	5605.64	5131.68	5403.86	1552.67	1386.79	4183.42	2738.77	6442.11	7411.46	0.24:0.18:0.70:0.69:1.46:1.62:1.46:1.36:1.24:1.31:0.38:0.34:1.01:0.66:1.56:1.79	1877.76	6092.52	3368.75	5193.94	0.45:1.47:0.82:1.26	23025	Ras-related protein Rab-35 OS=Homo sapiens OX=9606 GN=RAB35 PE=1 SV=1
527	TRUE	Q02487|DSC2_HUMAN	12.32	9.43	8	7	Oxidation (M)	430.655	936.914	1358.17	4751.09	1239.97	3193.29	1442.69	2737.12	884.961	1142.16	571.038	525.5	1758.81	1963.27	3664.74	4301.61	0.22:0.49:0.70:2.46:0.64:1.65:0.75:1.42:0.46:0.59:0.30:0.27:0.91:1.02:1.90:2.23	1869.21	2599.73	901.513	2922.11	0.90:1.25:0.43:1.41	99962	Desmocollin-2 OS=Homo sapiens OX=9606 GN=DSC2 PE=1 SV=1
418	TRUE	P35241|RADI_HUMAN	36.64	4.46	6	2	Oxidation (M)	67.082	79.3974	139.859	206.861	636.446	520.018	372.265	604.982	261.747	324.547	269.911	372.599	392.48	233.473	509.451	417.484	0.20:0.23:0.41:0.61:1.88:1.54:1.10:1.79:0.77:0.96:0.80:1.10:1.16:0.69:1.51:1.24	159.802	533.428	354.632	388.222	0.45:1.49:0.99:1.08	68564	Radixin OS=Homo sapiens OX=9606 GN=RDX PE=1 SV=1
3	TRUE	P15924|DESP_HUMAN	17.26	51.31	158	158	Carbamidomethylation; Oxidation (M)	2450.66	1550.43	2167.32	2887.73	2926.95	4524.61	167823	169674	35464.8	35083	7498	7559.14	54944.6	29481.7	62510.7	74463.6	0.06:0.04:0.05:0.07:0.07:0.11:4.06:4.11:0.86:0.85:0.18:0.18:1.33:0.71:1.51:1.80	2264.04	87177.1	21440.3	55380.3	0.05:2.10:0.52:1.33	331774	Desmoplakin OS=Homo sapiens OX=9606 GN=DSP PE=1 SV=3
320	TRUE	P04899|GNAI2_HUMAN	1.25	25.63	12	7	Carbamidomethylation; Oxidation (M)	3001.22	3428.58	7740.88	8009.26	8229.65	10363.6	5777.9	6064.02	10829	11271.5	4157.93	2439.28	6409.16	4131.77	7466.44	8213.27	0.45:0.51:1.15:1.19:1.22:1.54:0.86:0.90:1.61:1.68:0.62:0.36:0.95:0.61:1.11:1.22	5544.98	7608.79	7174.42	6555.16	0.83:1.13:1.07:0.98	40451	Guanine nucleotide-binding protein G(i) subunit alpha-2 OS=Homo sapiens OX=9606 GN=GNAI2 PE=1 SV=3
20	TRUE	P35908|K22E_HUMAN	26.18	69.64	74	49	Oxidation (M)	100097	100047	145738	143470	296994	313810	441207	431562	224679	224525	80795.2	81469.7	263074	190118	393107	432512	0.41:0.41:0.60:0.59:1.23:1.30:1.83:1.79:0.93:0.93:0.33:0.34:1.09:0.79:1.63:1.79	122338	370893	152867	319703	0.51:1.54:0.63:1.32	65433	Keratin, type II cytoskeletal 2 epidermal OS=Homo sapiens OX=9606 GN=KRT2 PE=1 SV=2
960	TRUE	P20645|MPRD_HUMAN	2.26	12.64	3	3	Carbamidomethylation	23413.3	22154.5	1244.74	1039.96	3203.09	3661.88	677.891	645.309	12270.1	12470.6	1282.23	1298.42	11651.4	9519.88	1236.52	1551.68	3.49:3.30:0.19:0.16:0.48:0.55:0.10:0.10:1.83:1.86:0.19:0.19:1.74:1.42:0.18:0.23	11963.1	2047.04	6830.35	5989.87	1.78:0.31:1.02:0.89	30993	Cation-dependent mannose-6-phosphate receptor OS=Homo sapiens OX=9606 GN=M6PR PE=1 SV=1
288	TRUE	P15311|EZRI_HUMAN	14.89	21.16	14	10	Oxidation (M)	1531.17	973.585	574.508	608.559	4273.33	4330.94	4014.56	4981.6	4963.84	4379.92	442.551	794.711	4063.94	2025.51	2115.47	1753.89	0.59:0.37:0.22:0.23:1.63:1.66:1.54:1.91:1.90:1.68:0.17:0.30:1.55:0.77:0.81:0.67	921.955	4400.11	2645.26	2489.7	0.35:1.68:1.01:0.95	69413	Ezrin OS=Homo sapiens OX=9606 GN=EZR PE=1 SV=4
443	TRUE	O00186|STXB3_HUMAN	0.43	17.57	9	9	Oxidation (M)	3928.81	567.144	2519.46	2379.52	1511.65	2360.27	2708.5	2266.94	2663.4	3080.83	1463.79	2678.88	1621.15	1229.78	2176.16	2984.43	1.74:0.25:1.12:1.05:0.67:1.04:1.20:1.00:1.18:1.36:0.65:1.19:0.72:0.54:0.96:1.32	2348.73	2211.84	3015.92	2002.88	0.98:0.92:1.26:0.84	67764	Syntaxin-binding protein 3 OS=Homo sapiens OX=9606 GN=STXBP3 PE=1 SV=2
675	TRUE	Q96JI7|SPTCS_HUMAN	2.47	3.4	6	6		2475.97	2542.98	1001.79	2373.56	968.707	1501.04	1144.98	2131.8	2761.64	2233.7	931.521	653.539	1452.61	1698.78	2012.29	2676.85	1.39:1.42:0.56:1.33:0.54:0.84:0.64:1.19:1.55:1.25:0.52:0.37:0.81:0.95:1.13:1.50	2098.58	1485.3	1645.1	1960.13	1.17:0.83:0.92:1.09	278868	Spatacsin OS=Homo sapiens OX=9606 GN=SPG11 PE=1 SV=3
1175	TRUE	P32970|CD70_HUMAN	3.31	12.44	2	2		317.055	96.2312	888.883	793.803	124.739	291.826	328.852	254.009	623.951	594.325	316.824	371.719	290.634	210.29	440.662	332.377	0.81:0.25:2.27:2.02:0.32:0.74:0.84:0.65:1.59:1.52:0.81:0.95:0.74:0.54:1.12:0.85	591.777	328.817	674.143	318.491	1.24:0.69:1.41:0.67	21118	CD70 antigen OS=Homo sapiens OX=9606 GN=CD70 PE=1 SV=2
868	TRUE	P21926|CD9_HUMAN	49.9	8.33	3	3		4877.2	4490.99	7332.92	7216.46	23377.5	21745.3	11981.1	13419.5	5357.33	3983.12	5632.52	5528.21	17443.4	13912.3	25155.6	19617.7	0.41:0.38:0.61:0.60:1.96:1.82:1.00:1.12:0.45:0.33:0.47:0.46:1.46:1.16:2.11:1.64	5979.39	17630.9	5651.11	19265.2	0.49:1.45:0.47:1.59	25416	CD9 antigen OS=Homo sapiens OX=9606 GN=CD9 PE=1 SV=4
255	TRUE	O43491|E41L2_HUMAN	0.07	11.84	11	10	Oxidation (M)	6776.61	519.173	938.17	1062.39	402.58	916.641	7227.09	994.937	4642.76	4812.53	127.392	1268.22	1373.82	2397.68	1098.16	2572.54	2.92:0.22:0.40:0.46:0.17:0.39:3.11:0.43:2.00:2.07:0.05:0.55:0.59:1.03:0.47:1.11	2697.76	2920.33	3353.89	1860.55	1.00:1.08:1.24:0.69	112588	Band 4.1-like protein 2 OS=Homo sapiens OX=9606 GN=EPB41L2 PE=1 SV=1
602	TRUE	O15118|NPC1_HUMAN	2.31	6.26	5	5	Oxidation (M)	1001.37	1842.93	619.237	1113.14	1973.99	1075.79	1593.03	1574.55	2613.09	2982.01	534.063	721.863	997.566	474.887	1112.46	1298.49	0.74:1.37:0.46:0.83:1.47:0.80:1.18:1.17:1.94:2.22:0.40:0.54:0.74:0.35:0.83:0.97	1202.38	1569.52	2156.96	970.851	0.82:1.06:1.46:0.66	142167	NPC intracellular cholesterol transporter 1 OS=Homo sapiens OX=9606 GN=NPC1 PE=1 SV=2

## Sheet: Total Area Normalization
Protein Group	Top	Accession	Significance	Coverage (%)	#Peptides	#Unique	PTM	Myc_Exosomes_2-2 Area	Myc_Exosomes_2-1 Area	Myc_Exosomes_1-2 Area	Myc_Exosomes_1-1 Area	EV_Exosomes_2-2 Area	EV_Exosomes_2-1 Area	EV_Exosomes_1-2 Area	EV_Exosomes_1-1 Area	Myc_Cells_2-2 Area	Myc_Cells_2-1 Area	Myc_Cells_1-2 Area	Myc_Cells_1-1 Area	EV_Cells_2-2 Area	EV_Cells_2-1 Area	EV_Cells_1-2 Area	EV_Cells_1-1 Area	Sample Profile (Ratio)	Myc Exo Area	EV Exo Area	Myc Cell Area	EV Cell Area	Group Profile (Ratio)	Avg. Mass	Description
412	TRUE	Q9HD26|GOPC_HUMAN	90.21	28.14	10	10	Carbamidomethylation	79.3122	0	38.8745	46.3494	0	74.9914	35.3773	75.4324	418.576	373.449	701.874	751.677	396.392	624.575	342.234	404.7	0.05:0.00:0.04:0.05:0.00:0.10:0.08:0.16:2.35:2.08:1.51:1.54:2.07:2.28:1.67:2.05	145.02	265.837	2919.27	3146.9	0.09:0.16:1.80:1.94	50520	Golgi-associated PDZ and coiled-coil motif-containing protein OS=Homo sapiens OX=9606 GN=GOPC PE=1 SV=1
862	TRUE	Q16512|PKN1_HUMAN	50.79	4.25	4	3	Oxidation (M)	54.0668	44.3404	22.0952	0	30.9412	125.263	39.2662	23.6546	80.3119	62.3908	184.925	126.907	76.1396	66.357	65.7217	82.8753	0.17:0.15:0.11:0.00:0.19:0.82:0.41:0.24:2.21:1.71:1.95:1.27:1.95:1.19:1.57:2.06	86.1271	175.927	717.601	538.27	0.23:0.46:1.89:1.42	103932	Serine/threonine-protein kinase N1 OS=Homo sapiens OX=9606 GN=PKN1 PE=1 SV=2
36	TRUE	P35222|CTNB1_HUMAN	111.14	54.42	43	34	Acetylation (N-term); Carbamidomethylation; Oxidation (M)	2422.64	2246.92	2767.44	2140.03	3399.88	2185.56	1712.17	1207.15	16707.3	16474.7	35866.7	36955.9	20395.8	28551	20942.8	12783.8	0.03:0.03:0.06:0.05:0.09:0.06:0.08:0.05:2.04:2.00:1.67:1.64:2.31:2.26:2.21:1.41	3174.6	5172.18	132126	147261	0.04:0.07:1.84:2.05	85497	Catenin beta-1 OS=Homo sapiens OX=9606 GN=CTNNB1 PE=1 SV=1
198	TRUE	Q6P1M0|S27A4_HUMAN	56.47	30.48	18	18	Carbamidomethylation; Oxidation (M)	423.91	381.023	675.697	551.914	568.908	396.653	171.119	409.589	566.747	508.656	1390.11	1638.84	485.259	539.15	810.394	673.297	0.15:0.15:0.38:0.32:0.40:0.30:0.20:0.47:1.79:1.60:1.68:1.88:1.42:1.11:2.22:1.92	983.929	952.842	4823.14	4626.88	0.35:0.33:1.69:1.63	72064	Long-chain fatty acid transport protein 4 OS=Homo sapiens OX=9606 GN=SLC27A4 PE=1 SV=1
129	TRUE	P05141|ADT2_HUMAN	137.87	19.8	21	11	Carbamidomethylation; Oxidation (M)	985.573	862.856	497.282	508.467	369.585	513.231	454.325	445.134	20294.7	19718.9	59052.2	61416.5	31108.4	47515.7	37142.4	24611.5	0.02:0.02:0.02:0.02:0.02:0.02:0.02:0.02:1.63:1.57:1.81:1.79:2.31:2.47:2.58:1.78	884.984	1180.65	185936	250245	0.02:0.02:1.70:2.28	32852	ADP/ATP translocase 2 OS=Homo sapiens OX=9606 GN=SLC25A5 PE=1 SV=7
78	TRUE	P02786|TFR1_HUMAN	50.77	43.95	33	33	Oxidation (M)	3124.67	2707.78	4922.48	6239.46	3300.99	3010.5	3904.26	503.223	7674.8	6571	14814.2	18694	8889.37	11074.1	11841.5	11906.6	0.08:0.08:0.20:0.27:0.17:0.17:0.34:0.04:1.78:1.52:1.31:1.58:1.92:1.67:2.38:2.49	5977.8	6805.79	58472.5	79910.2	0.16:0.18:1.55:2.11	84871	Transferrin receptor protein 1 OS=Homo sapiens OX=9606 GN=TFRC PE=1 SV=2
110	TRUE	P23396|RS3_HUMAN	100.86	62.14	24	24	Carbamidomethylation; Oxidation (M)	2526.08	2487.65	3557.85	3618.18	1596.91	2086.81	1653	1528.73	37894.5	37264.7	54422.2	57716.6	32454	35886.8	38139.9	33922.3	0.02:0.02:0.04:0.04:0.02:0.03:0.04:0.04:2.55:2.49:1.40:1.41:2.03:1.57:2.22:2.06	4173.78	4459.21	255931	256729	0.03:0.03:1.96:1.97	26688	40S ribosomal protein S3 OS=Homo sapiens OX=9606 GN=RPS3 PE=1 SV=2
201	TRUE	P30530|UFO_HUMAN	35.61	17.11	13	12	Oxidation (M)	591.874	1126.91	460.932	254.679	309.164	697.605	212.19	188.639	373.395	295.707	520.639	611.774	271.542	462.155	330.959	244.3	0.38:0.79:0.46:0.26:0.38:0.93:0.45:0.39:2.08:1.64:1.11:1.24:1.41:1.67:1.60:1.23	742.728	841.242	2387.4	2322.89	0.47:0.53:1.52:1.48	98337	Tyrosine-protein kinase receptor UFO OS=Homo sapiens OX=9606 GN=AXL PE=1 SV=4
102	TRUE	P06756|ITAV_HUMAN	28.73	27.86	25	25	Carbamidomethylation; Oxidation (M)	5553.15	5538.58	14298.8	13788.6	8484.02	8977.15	2602.11	2292.38	6698.16	6623.21	10673.7	10938.7	5459.15	5674.12	5937.33	6391.29	0.19:0.21:0.77:0.76:0.56:0.64:0.30:0.25:2.01:1.98:1.22:1.20:1.52:1.11:1.55:1.73	14087.8	12786.4	46787.9	43114.1	0.48:0.44:1.60:1.48	116038	Integrin alpha-V OS=Homo sapiens OX=9606 GN=ITGAV PE=1 SV=2
590	TRUE	Q14624|ITIH4_HUMAN	69.21	9.68	7	7	Oxidation (M)	28183.7	20633	25262.4	24311.6	21928.6	25131.1	14152.1	13904.4	353.294	388.225	741.694	738.336	40.894	512.284	89.2929	85.533	1.36:1.10:1.90:1.89:2.04:2.53:2.26:2.15:0.15:0.16:0.12:0.11:0.02:0.14:0.03:0.03	32460.8	46617.8	2874.14	1151.31	1.56:2.24:0.14:0.06	103357	Inter-alpha-trypsin inhibitor heavy chain H4 OS=Homo sapiens OX=9606 GN=ITIH4 PE=1 SV=4
396	TRUE	P08865|RSSA_HUMAN	67.92	52.2	10	10	Acetylation (N-term); Carbamidomethylation; Oxidation (M)	888.882	656.178	692.347	425.095	351.253	319.694	401.56	270.847	741.88	702.645	1080.77	989.84	632.867	1006.72	699.489	729.601	0.29:0.24:0.36:0.23:0.22:0.22:0.44:0.29:2.16:2.03:1.20:1.05:1.71:1.90:1.76:1.91	846.323	886.918	4852.91	5493.72	0.28:0.29:1.61:1.82	32854	40S ribosomal protein SA OS=Homo sapiens OX=9606 GN=RPSA PE=1 SV=4
948	TRUE	Q6PCB8|EMB_HUMAN	54.2	13.76	3	3		791.52	694.414	567.206	350.82	1200.48	1203.4	211.7	265.261	498.249	492.5	2514.5	2580.18	914.641	1544.31	1013.3	1159.2	0.19:0.18:0.21:0.13:0.55:0.59:0.17:0.20:1.03:1.01:1.99:1.94:1.76:2.07:1.82:2.16	753.557	1597.21	6330.55	8278.47	0.18:0.38:1.49:1.95	36881	Embigin OS=Homo sapiens OX=9606 GN=EMB PE=1 SV=1
35	TRUE	Q6YHK3|CD109_HUMAN	58.05	46.85	54	54	Carbamidomethylation; Oxidation (M)	4138.75	4310.57	9928.57	9845.82	7370.97	5360.72	1529.63	1253.02	16414.9	17620.3	27394.2	28105.6	23742	26319.8	17418.3	14371	0.06:0.07:0.22:0.22:0.20:0.16:0.07:0.06:2.02:2.15:1.28:1.26:2.71:2.10:1.85:1.59	10091	8635.22	119759	147341	0.14:0.12:1.68:2.06	161689	CD109 antigen OS=Homo sapiens OX=9606 GN=CD109 PE=1 SV=2
414	TRUE	O95793|STAU1_HUMAN	63.97	20.28	10	10	Oxidation (M)	62.2509	71.6449	44.3108	34.3085	27.0819	35.2397	77.2609	67.9931	230.86	193.229	280.314	415.975	139.936	182.896	176.674	152.667	0.09:0.11:0.10:0.08:0.07:0.10:0.35:0.30:2.80:2.33:1.30:1.84:1.58:1.44:1.86:1.67	66.5706	150.113	1494	1182.93	0.09:0.21:2.07:1.64	63182	Double-stranded RNA-binding protein Staufen homolog 1 OS=Homo sapiens OX=9606 GN=STAU1 PE=1 SV=2
730	TRUE	O14966|RAB7L_HUMAN	89.92	22.17	5	4		302.143	503.157	271.58	250.323	165.603	222.69	128.489	127.367	564.04	583.272	887.671	958.358	600.197	1137.78	577.134	562.371	0.12:0.22:0.17:0.16:0.13:0.19:0.17:0.17:2.00:2.05:1.20:1.24:1.98:2.62:1.77:1.80	422.051	405.119	4533.66	5274.18	0.16:0.15:1.71:1.98	23155	Ras-related protein Rab-7L1 OS=Homo sapiens OX=9606 GN=RAB29 PE=1 SV=1
206	TRUE	P12235|ADT1_HUMAN	119.45	22.82	18	8	Acetylation (N-term); Carbamidomethylation; Oxidation (M)	341.406	230.181	217.766	183.087	289.161	278.213	344.785	277.412	3210.52	3162.98	7163.43	7746.62	4218.43	4770.2	6081.32	5550.28	0.02:0.02:0.02:0.02:0.03:0.04:0.07:0.05:1.73:1.69:1.47:1.52:2.11:1.67:2.84:2.69	308.188	823.008	26113.2	37911.1	0.02:0.05:1.60:2.33	33064	ADP/ATP translocase 1 OS=Homo sapiens OX=9606 GN=SLC25A4 PE=1 SV=4
87	TRUE	P05556|ITB1_HUMAN	28.73	23.81	24	24	Carbamidomethylation; Oxidation (M)	36354.9	35743.1	60653	60109.7	65317.2	63246.6	13925.3	12179.1	34522	32419.4	46136.1	49874.3	35389.3	41060.6	34417.2	30051.3	0.23:0.25:0.60:0.61:0.80:0.84:0.29:0.25:1.91:1.78:0.98:1.01:1.82:1.48:1.65:1.50	66998.4	85920.4	224781	255349	0.42:0.54:1.42:1.61	88415	Integrin beta-1 OS=Homo sapiens OX=9606 GN=ITGB1 PE=1 SV=2
999	TRUE	Q04771|ACVR1_HUMAN	74.39	6.68	3	3	Oxidation (M)	421.933	296.033	116.095	147.476	226.839	149.891	95.167	87.5614	154.827	141.362	416.315	467.968	289.208	385.643	259.554	209.24	0.42:0.32:0.18:0.24:0.43:0.31:0.31:0.28:1.34:1.22:1.38:1.48:2.33:2.17:1.95:1.64	333.022	370.679	1369.63	2044.98	0.32:0.36:1.33:1.99	57153	Activin receptor type-1 OS=Homo sapiens OX=9606 GN=ACVR1 PE=1 SV=1
116	TRUE	P25705|ATPA_HUMAN	112.62	47.92	26	26	Carbamidomethylation; Oxidation (M)	1233.46	1242.55	1101.18	725.268	812.079	843.114	798.568	773.649	16568	16457.1	26414.9	27795	16104.1	15854.6	22766	23401.3	0.02:0.02:0.03:0.02:0.02:0.03:0.04:0.04:2.20:2.17:1.34:1.34:1.98:1.36:2.61:2.79	1391.61	2115.81	116493	144893	0.02:0.03:1.76:2.19	59751	ATP synthase subunit alpha, mitochondrial OS=Homo sapiens OX=9606 GN=ATP5F1A PE=1 SV=1
260	TRUE	P02787|TRFE_HUMAN	72.1	23.64	15	15	Oxidation (M)	12639.1	10991.8	15173	14663.9	12086.4	10609.4	5963.14	5113.97	424.565	259.904	734.903	1001.74	455.483	511.093	383.275	492.278	1.13:1.09:2.12:2.12:2.09:1.98:1.77:1.47:0.33:0.20:0.22:0.29:0.33:0.26:0.26:0.35	18062.3	20429.8	2912.27	3356.81	1.61:1.83:0.26:0.30	77064	Serotransferrin OS=Homo sapiens OX=9606 GN=TF PE=1 SV=3
289	TRUE	P50570|DYN2_HUMAN	50.29	19.89	13	13	Carbamidomethylation; Oxidation (M)	335.523	303.653	484.403	471.603	86.9267	107.691	168.995	169.242	484.88	465.519	558.952	973.167	295.248	779.757	385.132	520.733	0.17:0.17:0.39:0.40:0.09:0.12:0.29:0.28:2.21:2.10:0.97:1.61:1.25:2.30:1.52:2.13	547.982	405.942	3322.31	3472.59	0.28:0.21:1.71:1.79	98064	Dynamin-2 OS=Homo sapiens OX=9606 GN=DNM2 PE=1 SV=2
229	TRUE	Q9Y624|JAM1_HUMAN	45.84	49.5	15	15	Carbamidomethylation; Oxidation (M)	4329.95	3362.42	7539.35	6993.5	8862.08	8321.36	1747.16	1657.67	10157.5	8886.14	11849	12145.1	10782	11672.1	9435.6	9941.41	0.11:0.09:0.30:0.29:0.44:0.44:0.15:0.14:2.28:1.98:1.01:0.99:2.24:1.70:1.83:2.01	7788.86	11408.1	61252.3	76161.2	0.20:0.29:1.56:1.95	32583	Junctional adhesion molecule A OS=Homo sapiens OX=9606 GN=F11R PE=1 SV=1
846	TRUE	Q9Y5X3|SNX5_HUMAN	52.09	14.36	5	5	Acetylation (N-term); Oxidation (M)	98.9116	116.409	171.033	165.093	123.791	114.586	92.2344	123.106	169.717	192.805	286.292	287.466	178.726	133.575	150.695	179.725	0.13:0.17:0.36:0.36:0.33:0.33:0.42:0.54:2.02:2.28:1.30:1.25:1.98:1.03:1.56:1.93	253.134	294.968	1261.43	1195.85	0.34:0.39:1.68:1.59	46816	Sorting nexin-5 OS=Homo sapiens OX=9606 GN=SNX5 PE=1 SV=1
74	TRUE	P08069|IGF1R_HUMAN	94.08	24.87	29	25	Carbamidomethylation; Oxidation (M)	1080.38	753.962	414.855	787.727	522.543	674.175	403.793	391.278	3541.69	3985.88	4611.77	4928.04	4321.35	4418.55	3939.41	4278.29	0.08:0.06:0.05:0.09:0.07:0.10:0.09:0.09:2.16:2.42:1.07:1.09:2.45:1.75:2.08:2.35	959.213	1253.53	24246	31035.8	0.07:0.09:1.69:2.16	154793	Insulin-like growth factor 1 receptor OS=Homo sapiens OX=9606 GN=IGF1R PE=1 SV=1
68	TRUE	P08581|MET_HUMAN	69.83	30.65	34	34	Carbamidomethylation; Oxidation (M)	2720.22	2352.1	3713.64	3100.1	1470.31	1561.29	341.38	488.987	5986.28	5970.85	7270.51	7666.06	7351.53	8066.28	6427.05	5956.35	0.11:0.11:0.24:0.21:0.12:0.14:0.05:0.07:2.21:2.19:1.03:1.03:2.52:1.93:2.06:1.98	4036.4	2201.72	38343.7	50445.9	0.17:0.09:1.61:2.12	155541	Hepatocyte growth factor receptor OS=Homo sapiens OX=9606 GN=MET PE=1 SV=4
559	TRUE	Q06787|FMR1_HUMAN	61.51	9.65	5	5		257.797	227.298	181.875	438.817	165.085	241.685	127.359	114.415	409.013	314.387	570.379	512.636	273.055	564.41	431.84	473.907	0.16:0.16:0.18:0.45:0.20:0.32:0.27:0.23:2.26:1.72:1.20:1.03:1.40:2.02:2.06:2.35	405.031	403.458	2468.77	3117.04	0.25:0.25:1.54:1.95	71174	Synaptic functional regulator FMR1 OS=Homo sapiens OX=9606 GN=FMR1 PE=1 SV=1
544	TRUE	Q8TCT9|HM13_HUMAN	79.34	18.83	7	7	Oxidation (M)	947.061	872.115	729.59	736.453	776.571	728.517	323.909	295.241	1192.3	1564.98	1910.26	1725.69	1617.53	2168.41	1343.35	1390.19	0.16:0.17:0.20:0.21:0.26:0.26:0.19:0.16:1.82:2.37:1.11:0.96:2.29:2.15:1.78:1.91	1060.97	1261.29	9001.23	11682.7	0.18:0.22:1.57:2.03	41488	Minor histocompatibility antigen H13 OS=Homo sapiens OX=9606 GN=HM13 PE=1 SV=1
537	TRUE	P48730|KC1D_HUMAN	101.85	18.55	7	7	Oxidation (M)	278.07	252.043	264.001	215.68	210.142	186.344	154.714	136.96	760.402	817.401	1896.11	1871.59	826.678	2143.04	727.586	722.169	0.07:0.08:0.11:0.09:0.11:0.11:0.14:0.12:1.80:1.92:1.71:1.61:1.82:3.29:1.49:1.54	329.662	437.056	6529.99	7544.89	0.09:0.12:1.76:2.03	47330	Casein kinase I isoform delta OS=Homo sapiens OX=9606 GN=CSNK1D PE=1 SV=2
344	TRUE	P54709|AT1B3_HUMAN	43.53	43.37	12	12	Oxidation (M)	5024.28	4289.3	8370.72	7841.78	5331.59	5584.2	1514.58	1798.23	4936.12	4842.28	9335.39	9269.76	3197.09	7125.92	7677.72	6868.09	0.20:0.19:0.53:0.51:0.42:0.47:0.20:0.23:1.76:1.71:1.27:1.20:1.06:1.65:2.37:2.21	8886.81	8192.72	36590.9	44822.1	0.36:0.33:1.49:1.82	31513	Sodium/potassium-transporting ATPase subunit beta-3 OS=Homo sapiens OX=9606 GN=ATP1B3 PE=1 SV=1
556	TRUE	Q96P48|ARAP1_HUMAN	53.45	7.52	7	7		726.647	564.779	582.224	574.279	346.329	482.729	311.543	332.495	486.181	285.523	897.556	1071.54	461.913	565.089	437.68	214.119	0.36:0.31:0.45:0.46:0.33:0.50:0.51:0.53:2.12:1.24:1.50:1.70:1.87:1.60:1.66:0.84	797.713	944.726	3295.16	3000.43	0.40:0.47:1.64:1.49	162192	Arf-GAP with Rho-GAP domain, ANK repeat and PH domain-containing protein 1 OS=Homo sapiens OX=9606 GN=ARAP1 PE=1 SV=3
173	TRUE	O75146|HIP1R_HUMAN	53.38	22.57	19	18	Oxidation (M)	660.877	458.181	377.697	486.455	279.745	324.104	588.183	659.541	932.401	1056.84	1228.98	1345.41	1090.57	1001.66	1151.47	1225.33	0.16:0.12:0.14:0.19:0.13:0.16:0.47:0.51:1.96:2.21:0.99:1.03:2.13:1.37:2.10:2.32	636.276	1375.15	6450.22	8257.67	0.15:0.33:1.54:1.98	119388	Huntingtin-interacting protein 1-related protein OS=Homo sapiens OX=9606 GN=HIP1R PE=1 SV=2
259	TRUE	P63244|RACK1_HUMAN	94.25	67.82	14	14	Carbamidomethylation; Oxidation (M)	1131	628.189	1115.73	943.645	990.402	909.374	582.75	654.9	9975.68	10805.6	11302.5	12789.3	8004.42	9236.29	8575.67	7344.71	0.04:0.02:0.05:0.05:0.06:0.06:0.06:0.07:2.72:2.93:1.18:1.27:2.03:1.64:2.03:1.81	1274.39	1962.41	65091.1	60268.7	0.04:0.06:2.02:1.87	35077	Receptor of activated protein C kinase 1 OS=Homo sapiens OX=9606 GN=RACK1 PE=1 SV=3
48	TRUE	P35221|CTNA1_HUMAN	58.11	51.21	40	32	Acetylation (N-term); Carbamidomethylation; Oxidation (M)	3963.16	3431.45	7884.12	7610.94	12147.7	13342.6	2812.25	2238.7	22593	24072.8	30402.4	28974.3	32183.4	29495	25889.5	27204.8	0.04:0.04:0.13:0.13:0.24:0.29:0.10:0.07:2.05:2.17:1.06:0.96:2.72:1.74:2.04:2.23	8100.73	16968.4	150579	210522	0.08:0.18:1.56:2.18	100071	Catenin alpha-1 OS=Homo sapiens OX=9606 GN=CTNNA1 PE=1 SV=1
30	TRUE	P49368|TCPG_HUMAN	114.78	72.11	47	47	Carbamidomethylation; Oxidation (M)	2855.25	2550.86	1945.29	1506.92	1920.53	1870.89	1385.41	1382.84	34400.7	33000.9	41398.6	43920.2	41864.7	38970.1	43675.7	46238.2	0.02:0.02:0.02:0.02:0.03:0.03:0.03:0.03:2.24:2.13:1.03:1.04:2.53:1.65:2.46:2.71	2789.13	4163.79	217063	315151	0.02:0.03:1.61:2.34	60534	T-complex protein 1 subunit gamma OS=Homo sapiens OX=9606 GN=CCT3 PE=1 SV=4
533	TRUE	P21796|VDAC1_HUMAN	100.74	43.46	9	9		314.394	260.686	283.867	263.652	371.029	313.564	193.082	211.012	1359.64	1407.8	1976.83	2004.14	739.22	1127.07	936.757	911.563	0.07:0.07:0.10:0.10:0.17:0.15:0.15:0.16:2.80:2.88:1.55:1.50:1.41:1.51:1.67:1.69	368.296	672.519	9303.85	6692.24	0.09:0.16:2.18:1.57	30773	Voltage-dependent anion-selective channel protein 1 OS=Homo sapiens OX=9606 GN=VDAC1 PE=1 SV=2
84	TRUE	P27824|CALX_HUMAN	59.66	40.2	25	25	Oxidation (M)	7010.42	6333.47	6264.72	6037.31	3649.96	2943.87	4697.2	4666.28	9914.45	10705.1	11975.5	12808.7	10400.6	10876.2	11979.4	10991.1	0.17:0.17:0.24:0.24:0.17:0.15:0.38:0.36:2.10:2.25:0.97:0.99:2.04:1.49:2.20:2.10	8394.81	10940.6	65317.1	81160.1	0.20:0.26:1.58:1.96	67568	Calnexin OS=Homo sapiens OX=9606 GN=CANX PE=1 SV=2
222	TRUE	Q14118|DAG1_HUMAN	72.46	19.22	15	15	Oxidation (M)	894.402	1245.98	1535.5	1392.85	710.36	814.097	739.442	695.649	4124.11	4041.66	5475.26	5052.58	3665.69	3624.52	2721.09	2593.36	0.07:0.10:0.18:0.17:0.10:0.13:0.18:0.17:2.73:2.65:1.38:1.22:2.25:1.56:1.56:1.55	1731.82	2087.15	26467.6	22924.4	0.13:0.16:1.99:1.72	97441	Dystroglycan OS=Homo sapiens OX=9606 GN=DAG1 PE=1 SV=2
739	TRUE	Q16513|PKN2_HUMAN	44.66	6.2	6	5	Oxidation (M)	46.7775	0	0	38.0418	37.8924	0	0	18.8488	108.218	134.716	121.963	231.804	126.901	78.4772	114.981	130.792	0.11:0.00:0.00:0.14:0.17:0.00:0.00:0.14:2.20:2.72:0.95:1.71:2.40:1.04:2.03:2.40	108.285	133.763	905.07	949.228	0.21:0.26:1.73:1.81	112035	Serine/threonine-protein kinase N2 OS=Homo sapiens OX=9606 GN=PKN2 PE=1 SV=1
72	TRUE	P11021|BIP_HUMAN	67.32	49.24	38	33	Oxidation (M)	11793.5	10142.7	5969.56	5457.7	5273.8	5349.35	3664.63	2051.46	11192.4	11395.1	13300	13230.8	10358.7	10619.5	9717.74	9999.63	0.28:0.27:0.23:0.21:0.25:0.27:0.29:0.16:2.37:2.39:1.07:1.02:2.04:1.46:1.78:1.91	10293.6	10026.3	71069.4	74451.6	0.25:0.24:1.71:1.80	72333	Endoplasmic reticulum chaperone BiP OS=Homo sapiens OX=9606 GN=HSPA5 PE=1 SV=2
291	TRUE	Q8N4S9|MALD2_HUMAN	72.55	21.86	11	11	Oxidation (M)	835.057	734.996	863.18	1060.45	824.607	623.45	578.966	403.671	1784.21	1658.9	1953.87	2238.99	2114.68	2400.26	2199.92	2126.11	0.11:0.11:0.18:0.23:0.21:0.18:0.26:0.17:2.10:1.94:0.88:0.96:2.32:1.84:2.25:2.26	1178.31	1527.93	10950.3	16107.8	0.16:0.21:1.47:2.16	64168	MARVEL domain-containing protein 2 OS=Homo sapiens OX=9606 GN=MARVELD2 PE=1 SV=2
851	TRUE	Q8NF37|PCAT1_HUMAN	36.23	9.55	5	5		562.864	483.779	352.267	103.311	760.038	334.407	145.34	42.6344	471.619	352.615	655.166	805.948	667.2	909.32	394.81	430.451	0.27:0.25:0.26:0.08:0.70:0.33:0.23:0.07:1.97:1.46:1.05:1.22:2.59:2.47:1.43:1.62	509.508	749.236	2994.43	4254.77	0.24:0.35:1.41:2.00	59151	Lysophosphatidylcholine acyltransferase 1 OS=Homo sapiens OX=9606 GN=LPCAT1 PE=1 SV=2
347	TRUE	O15439|MRP4_HUMAN	31.3	9.96	11	11	Oxidation (M)	1209.61	1183.27	514.612	1026.07	759.786	314.917	415.871	454.381	391.872	403.621	886.574	972.504	395.168	351.77	220.151	393.632	0.59:0.63:0.39:0.80:0.71:0.32:0.67:0.71:1.67:1.71:1.44:1.51:1.56:0.97:0.81:1.51	1245.55	1241	3257.33	2502.17	0.60:0.60:1.58:1.21	149527	Multidrug resistance-associated protein 4 OS=Homo sapiens OX=9606 GN=ABCC4 PE=1 SV=3
1248	TRUE	Q15390|MTFR1_HUMAN	126.56	8.41	2	2		0	0	0	0	0	0	0	0	118.873	112.985	115.527	114.349	94.0344	94.8631	108.194	104.065	0.00:0.00:0.00:0.00:0.00:0.00:0.00:0.00:2.91:2.75:1.08:1.02:2.14:1.51:2.30:2.30	0	0	694.866	737.901	0.00:0.00:1.94:2.06	37000	Mitochondrial fission regulator 1 OS=Homo sapiens OX=9606 GN=MTFR1 PE=1 SV=2
433	TRUE	Q9NP72|RAB18_HUMAN	41.65	49.51	9	8	Carbamidomethylation; Oxidation (M)	278.39	314.001	2026.88	1328.21	379.883	286.912	237.439	334.2	1921.52	2056.28	2122.75	2047.22	1826.89	1793.41	2019.13	1460.82	0.04:0.05:0.46:0.31:0.11:0.09:0.11:0.16:2.46:2.62:1.04:0.95:2.17:1.49:2.24:1.69	1520.49	798.565	12105.5	12999.2	0.22:0.12:1.77:1.90	22977	Ras-related protein Rab-18 OS=Homo sapiens OX=9606 GN=RAB18 PE=1 SV=1
473	TRUE	P78536|ADA17_HUMAN	58.85	12.5	8	8	Oxidation (M)	2093.72	1979.28	1194.36	925.906	566.15	314.193	909.463	404.607	2261.71	1639.96	2747.93	2822.3	2108.82	2003.03	2768.59	2618.89	0.25:0.26:0.22:0.18:0.13:0.08:0.35:0.15:2.33:1.68:1.08:1.06:2.02:1.34:2.47:2.43	1912.08	1515.96	13086.9	17585	0.22:0.18:1.54:2.06	93021	Disintegrin and metalloproteinase domain-containing protein 17 OS=Homo sapiens OX=9606 GN=ADAM17 PE=1 SV=1
[truncated: 908 more rows]

## Sheet: Imputed Matrix
Protein Group	Top	Accession	Significance	Coverage (%)	#Peptides	#Unique	PTM	Myc EV 2-2	Myc EV 2-1	Myc EV 1-2	Myc EV 1-1	Control EV 2-2	Control EV 2-1	Control EV 1-2	Control EV 1-1	Myc Cell 2-2	Myc Cell 2-1	Myc Cell 1-2	Myc Cell 1-1	Control Cell 2-2	Control Cell 2-1	Control Cell 1-2	Control Cell 1-1	Pvalue	Difference
[truncated: 953 more rows]

[truncated: 2 more sheets: Significance < 0.05, Z-Score]
