# Supplementary material for: Cell-surface tethered promiscuous biotinylators enable comparative small-scale surface proteomic analysis of human extracellular vesicles and cells
Source: eLife journal article supplement (doi:10.7554/elife.73982), 2022-03-04
Supplement: supp [file elife-73982-supp-v1.zip › elife_poa_e73982_Figure_5_source_data_3.xlsx]

## Sheet: Sheet1
Control EV vs Control Cell					Myc EV vs Myc Cell
Upregulated in EV		Upregulated in Cell			Upregulated in EV		Upregulated in Cell
Protein	Fold-change	Protein	Fold-change		Protein	Fold-change	Protein	Fold-change
ITIH4	161.35	CDH1	0.0407601		FN1	166.43	CDH1	0.0642059
MFGE8	73.1515	INSR	0.0438552		ITIH4	46.6976	PTPRK	0.0763488
S100A8	32.0092	BCAM	0.0521771		MFGE8	27.1399	INSR	0.0794267
DSG1	24.3365	CD44	0.0577724		TF	24.8363	LDLR	0.134459
CDSN	18.1748	PTPRK	0.067693		AGRN	20.7887	NAMPT	0.140663
TF	17.2738	LDLR	0.0741381		TSPAN14	15.8231	SPINT1	0.150171
AZGP1	17.1135	MSLN	0.0770626		SERPINE2	13.3684	COL17A1	0.151142
DSC1	12.7697	SPINT1	0.0835084		ATP2B4	12.1069	EGFR	0.155052
SERPINA12	8.0149	COL17A1	0.0953173		HSPG2	11.7569	SEMA7A	0.155221
TMC7	7.39379	SMPDL3B	0.101796		IGSF8	8.60937	IGF1R	0.169718
SCARB2	6.95959	PROCR	0.110385		SLC1A5	8.39933	LGALS3	0.176642
TSPAN14	6.86246	PTPRF	0.113194		CD82	7.99645	EFNB1	0.176964
IGSF8	6.28932	MET	0.113985		SDC1	7.93587	L1CAM	0.188891
PRNP	5.18694	IGF1R	0.114677		DSC2	7.07685	SORL1	0.199928
NPC1	4.74003	NEO1	0.119773		TM9SF2	6.93626	PROCR	0.213888
AGRN	4.60255	SORL1	0.121741		DSG1	6.509	PODXL	0.230505
CD82	3.84864	STIM1	0.123033		TMC7	6.28408	SLC12A7	0.233682
PROM2	3.83212	IL1RAP	0.135922		PROM2	6.07687	ATRN	0.235526
SLC29A1	3.69517	CD109	0.148334		ABCC1	5.82781	FZD6	0.236817
BSG	3.64818	PODXL	0.153807		S100A8	5.53525	SEMA3C	0.239344
SLC1A5	3.54755	SLC12A4	0.158554		SLC38A1	5.33971	DAG1	0.268133
ATP2B4	3.37012	ALCAM	0.159252		CD9	4.75153	STIM1	0.271755
ABCC1	3.29173	NAMPT	0.160868		AZGP1	4.1748	ALCAM	0.278973
TM9SF2	3.19184	SLC12A7	0.161227		LAMP1	4.11532	SLC33A1	0.281216
FN1	2.60015	PTPRS	0.161471		SLC6A8	3.95049	ERBB2	0.28125
CD9	2.57934	FZD6	0.161488		ADAM10	3.91002	MST1R	0.282243
HSPG2	2.20732	EFNB1	0.171889		CPD	3.70205	CD109	0.297482
ANXA2	2.19402	EGFR	0.177113		CD70	3.46431	PCDHGC3	0.304682
CD70	2.16646	PCDHGC3	0.183813		NPC1	3.33517	TGFBR1	0.320943
DSC2	2.0775	GPC1	0.18738		DSC1	3.33189	JAG1	0.326041
GNAS	2.04323	APP	0.189078		SLC38A2	3.08469	EPHA2	0.328331
SLC38A1	2.00963	PCDHGB5	0.190096		CPM	2.9622	PTPRF	0.328457
		TFRC	0.193662		ATP1A1	2.83235	NEO1	0.345378
		IFNGR1	0.209233		SLC29A1	2.79969	DCBLD2	0.35458
		DSG2	0.212965		BSG	2.74765	CDCP1	0.364414
		ADAM17	0.215014		SLC7A1	2.56893	SLC31A1	0.365173
		LRP1	0.220439		PRNP	2.5425	TFRC	0.369335
		DAG1	0.23733		ANXA2	2.54035	TPBG	0.380146
		TPBG	0.237543		SERPINA12	2.49326	CD44	0.394016
		MST1R	0.239105		GNAS	2.33405	BCAM	0.395855
		PTK7	0.239637				EPHB2	0.396234
		ERBB3	0.242886				IL1RAP	0.39971
		EPHB2	0.245525				MSLN	0.41156
		DCBLD2	0.257357				GPC2	0.430689
		EPHA2	0.260933				LRP1	0.432762
		CNNM4	0.265765				MET	0.438508
		ERBB2	0.270196				SLC12A4	0.449804
		LGALS3	0.270726				IFNGR1	0.454607
		PVR	0.298692				CD46	0.467617
		HM13	0.301467				C1QBP	0.484939
		ADAM15	0.305116				GPC1	0.490618
		LRP8	0.311898				F11R	0.493048
		EFNB2	0.326294				EFNB2	0.326294
		APLP2	0.331911				APLP2	0.331911
		BMPR2	0.336985				BMPR2	0.336985
		SEMA3C	0.340099				SEMA3C	0.340099
		L1CAM	0.343143				L1CAM	0.343143
		ULBP2	0.34843				ULBP2	0.34843
		NOTCH2	0.35973				NOTCH2	0.35973
		SEMA7A	0.365703				SEMA7A	0.365703
		F11R	0.366752				F11R	0.366752
		ITGB8	0.373547				ITGB8	0.373547
		PLXNB2	0.383301				PLXNB2	0.383301
		VASN	0.40182				VASN	0.40182
		SLC33A1	0.405058				SLC33A1	0.405058
		PLXNA1	0.409902				PLXNA1	0.409902
		C1QBP	0.41296				C1QBP	0.41296
		CDH3	0.417667				CDH3	0.417667
		ATRN	0.446626				ATRN	0.446626
		ACVR1	0.465056				ACVR1	0.465056
		EMB	0.470246				EMB	0.470246
		CD46	0.470872				CD46	0.470872
		ABCA12	0.473689				ABCA12	0.473689
		PCDH1	0.477802				PCDH1	0.477802
		GPC2	0.481823				GPC2	0.481823
Figure 5–Source data 3. List of proteins comparing enriched targets (>2-fold) in Con- trol EVs versus Control cells and Myc EVs versus Myc cells. (Left) Surface and secreted targets that were found enriched (EV/cell) in the Control samples are listed. The fold-change values between Control EVs and Control cells are listed in the column to the right of the gene name. (Right) Surface and secreted t…
