# Supplementary figures and images for: Cell-surface tethered promiscuous biotinylators enable comparative small-scale surface proteomic analysis of human extracellular vesicles and cells
Source: eLife journal article supplement (doi:10.7554/elife.73982), 2022-03-04

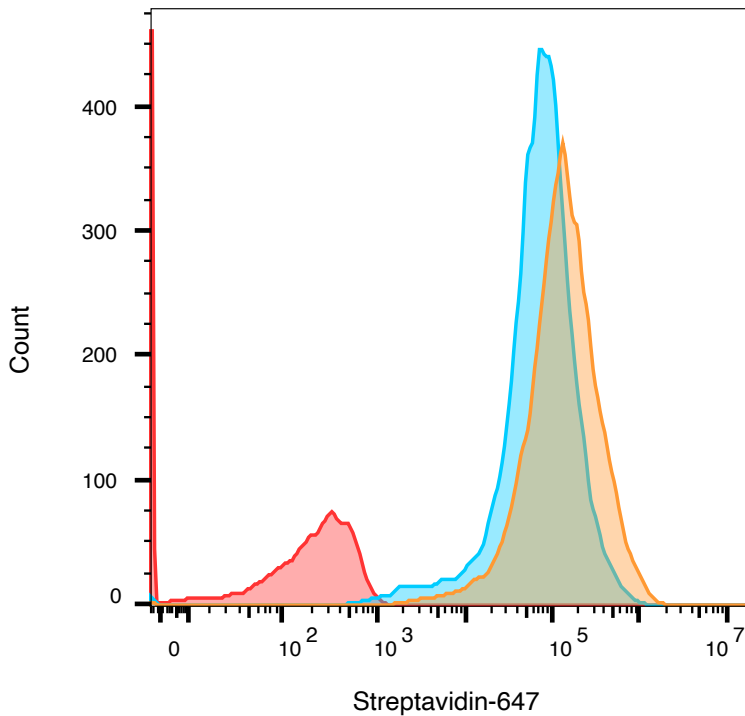

|        | Sample Name       |
|--------|-------------------|
| Orange | On-plate labeling |
| Cyan   | Lifted labeling   |
| Red    | Cell only         |

Supplement: supp [file elife-73982-supp-v1.zip]

**A**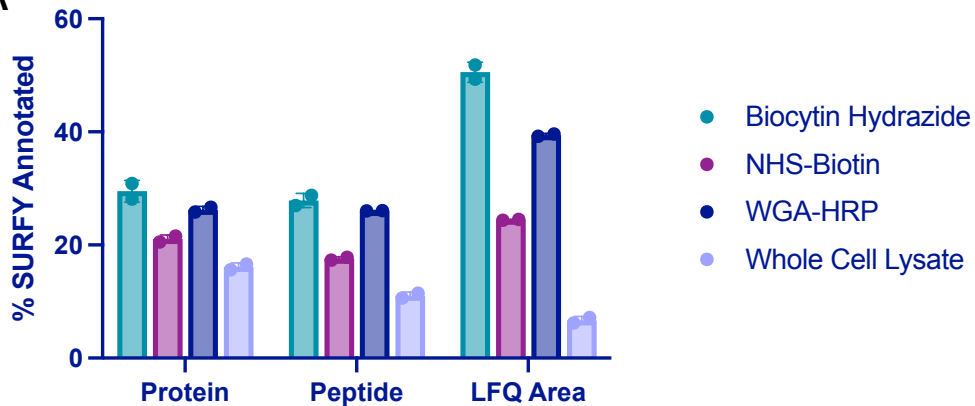**B**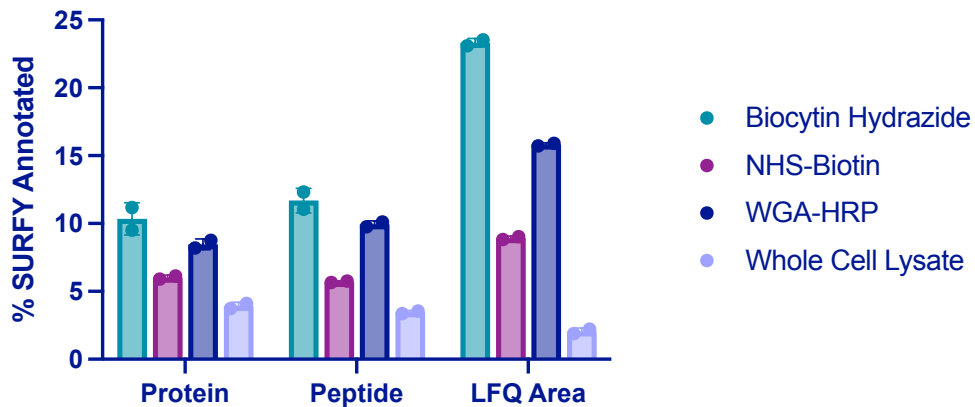

Supplement: supp [file elife-73982-supp-v1.zip]

**A**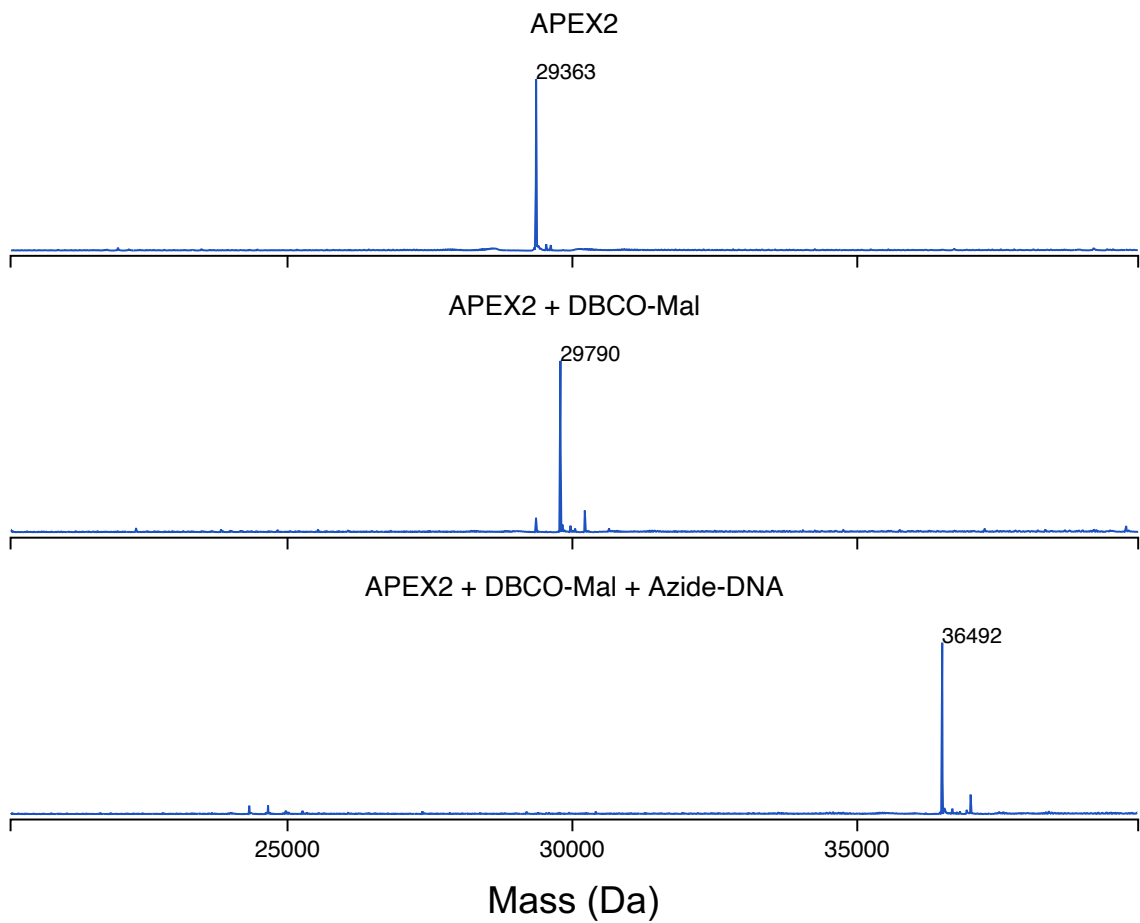**B**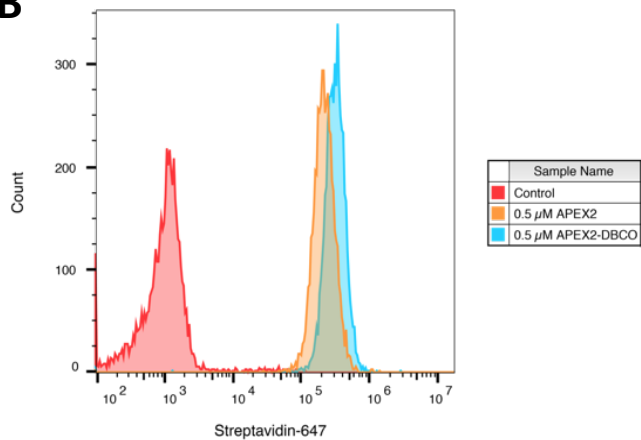**C**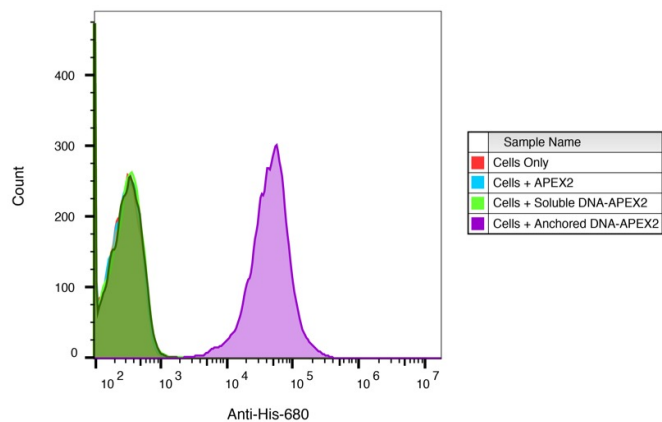

Supplement: supp [file elife-73982-supp-v1.zip]

A

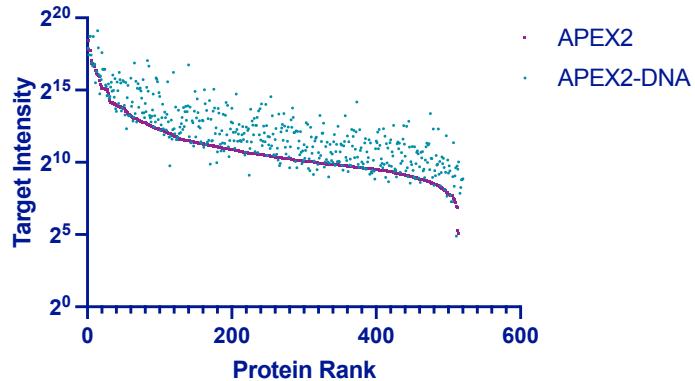

B

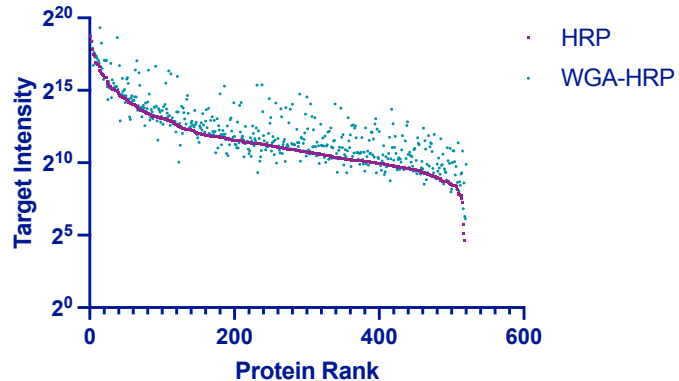

Supplement: supp [file elife-73982-supp-v1.zip]

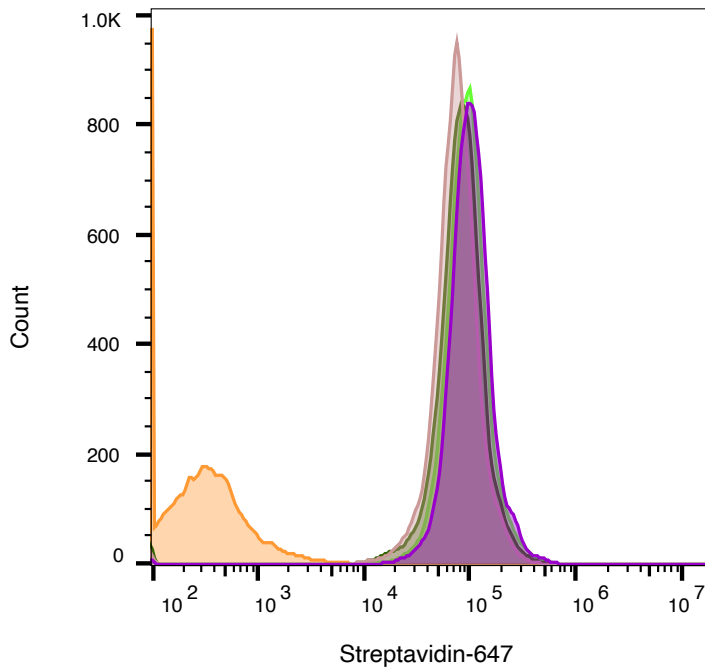

|   | Sample Name   |
|---|---------------|
| ■ | 30 minutes    |
| ■ | 15 minutes    |
| ■ | 5 minutes     |
| ■ | No incubation |
| ■ | Cell only     |

Supplement: supp [file elife-73982-supp-v1.zip]

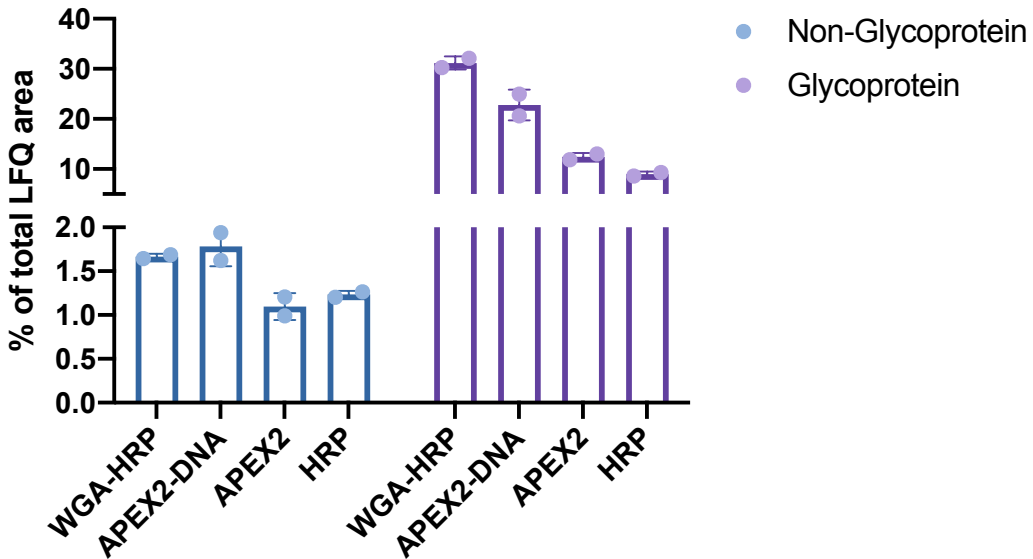

Supplement: supp [file elife-73982-supp-v1.zip]

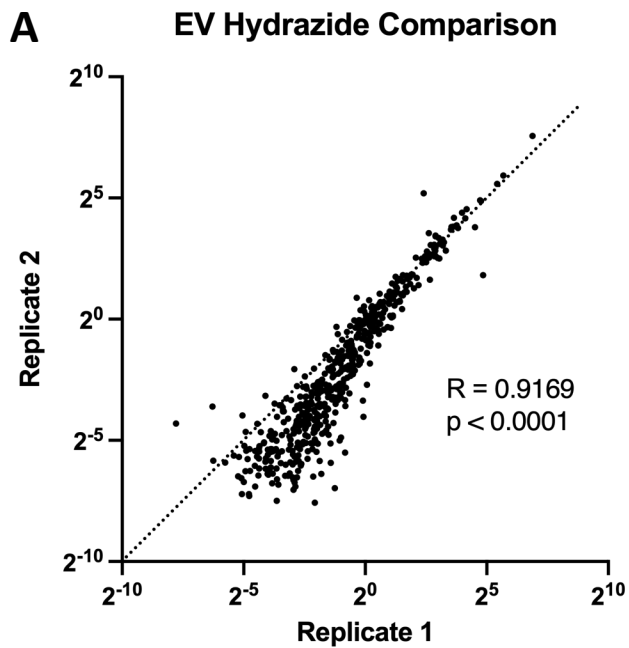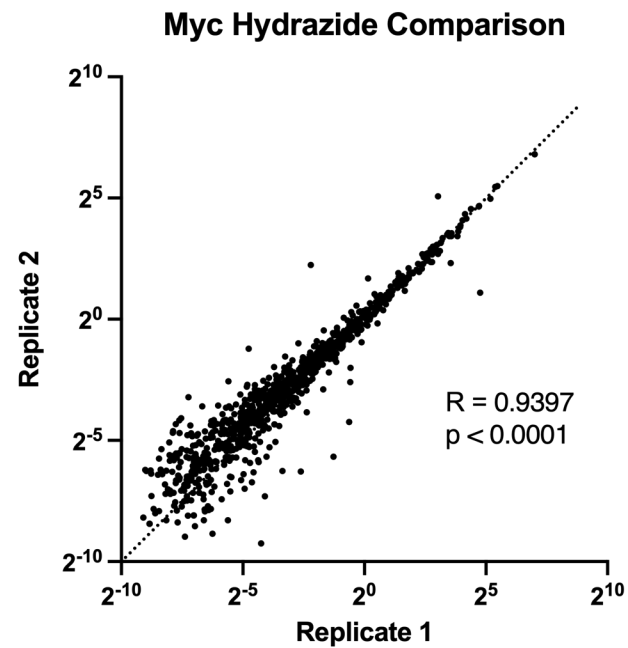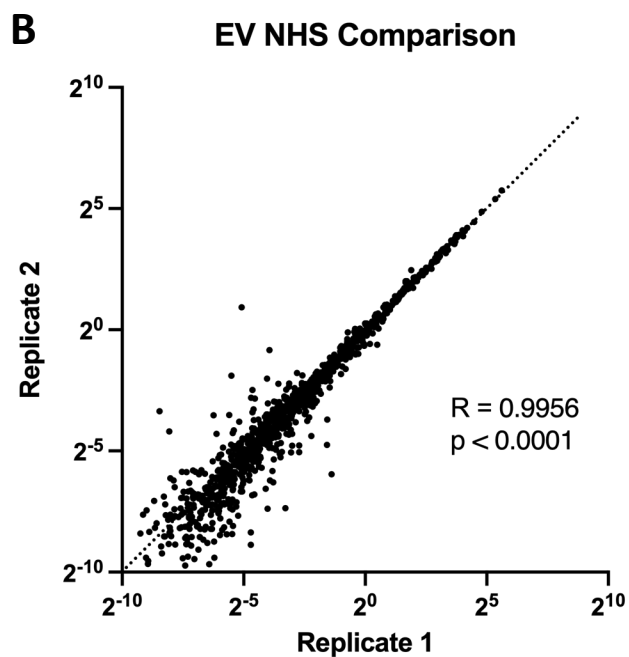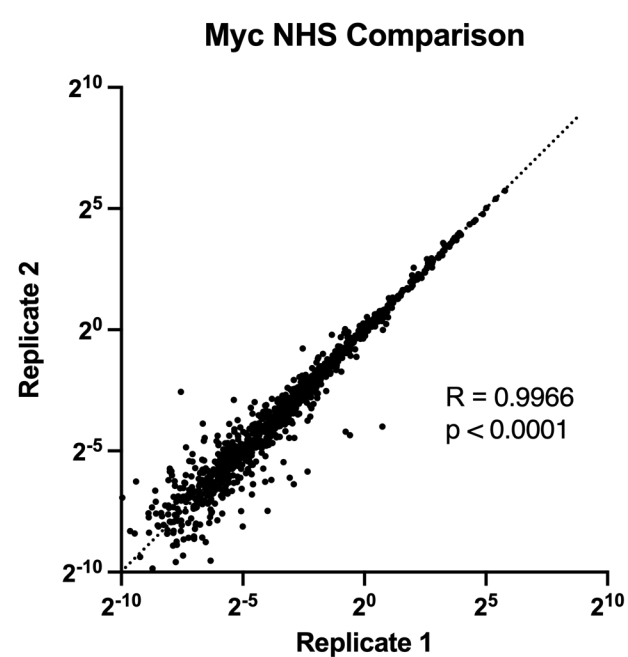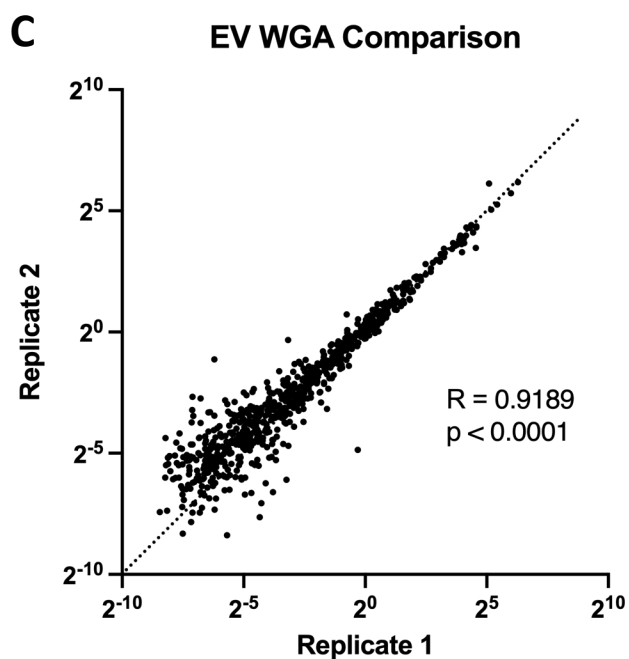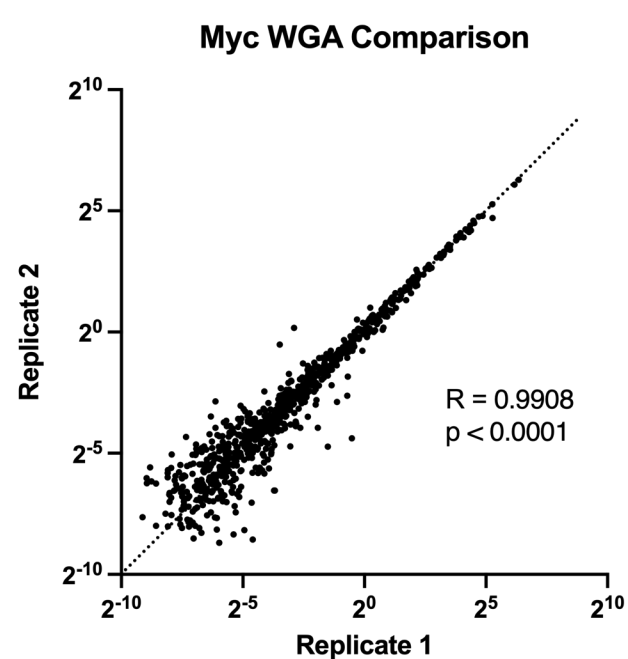

Supplement: supp [file elife-73982-supp-v1.zip]

50 kDa

30 kDa

25 kDa

15 kDa

APEX2

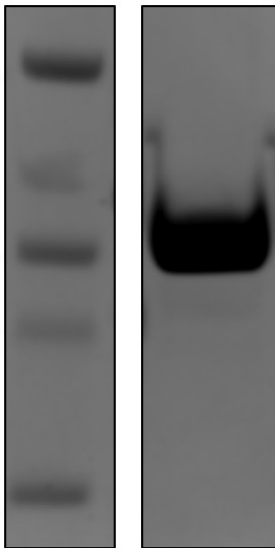

Supplement: supp [file elife-73982-supp-v1.zip]

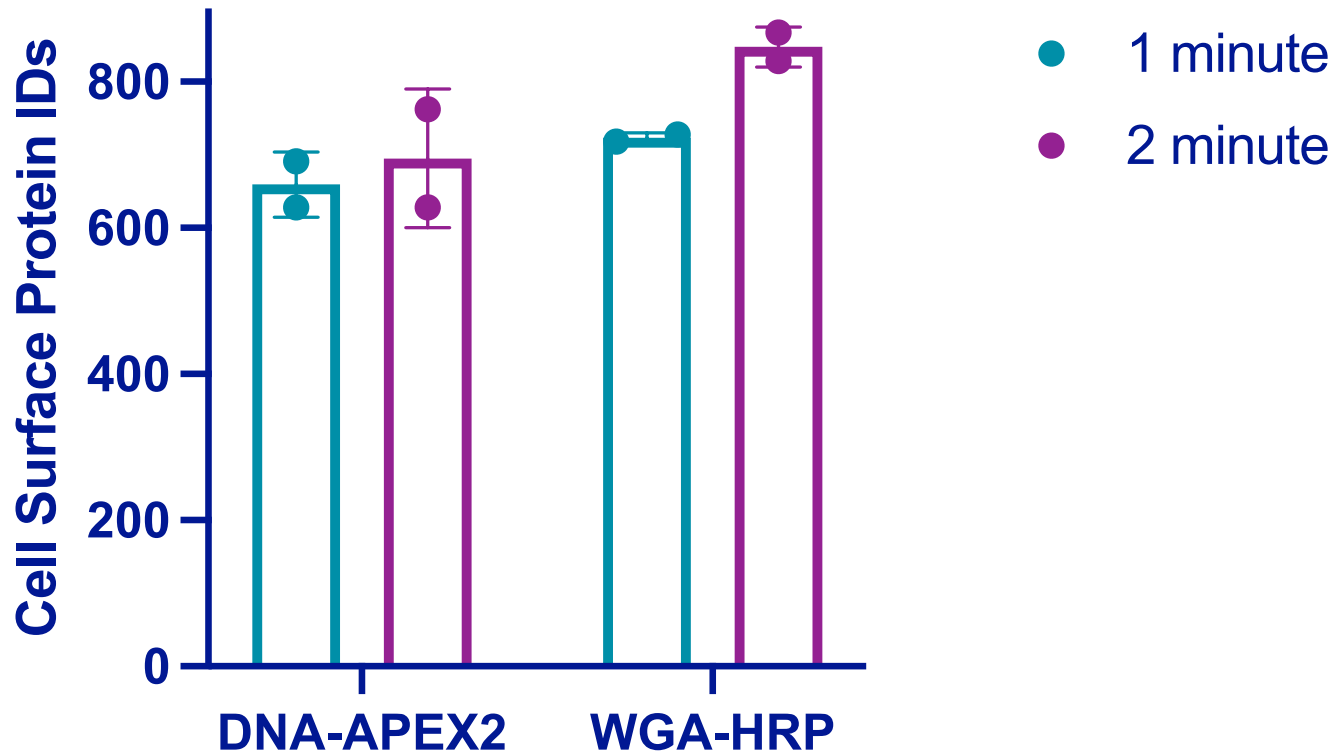

Supplement: supp [file elife-73982-supp-v1.zip › elife_poa_e73982_Figure_2_figure_supplement_4.pdf]

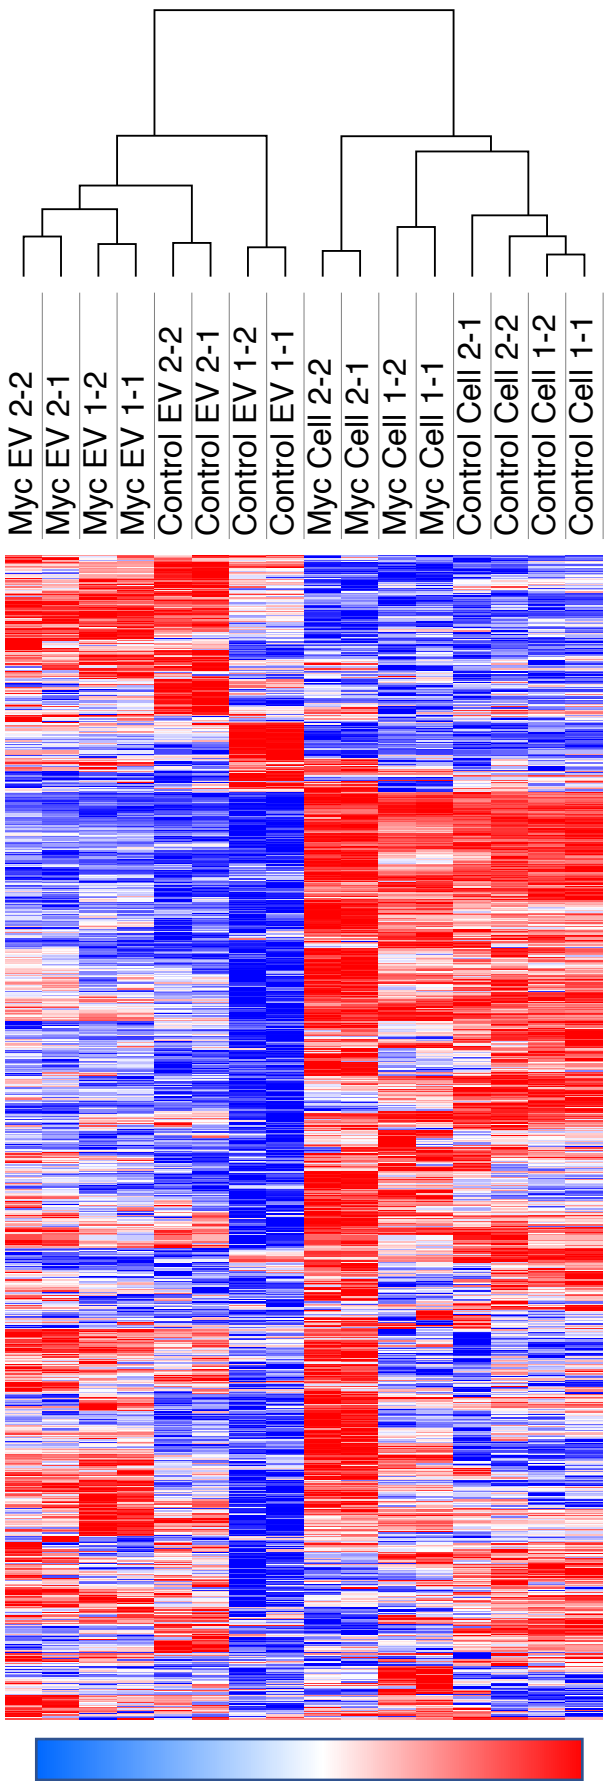

Supplement: supp [file elife-73982-supp-v1.zip › elife_poa_e73982_Figure_5_figure_supplement_1.pdf]

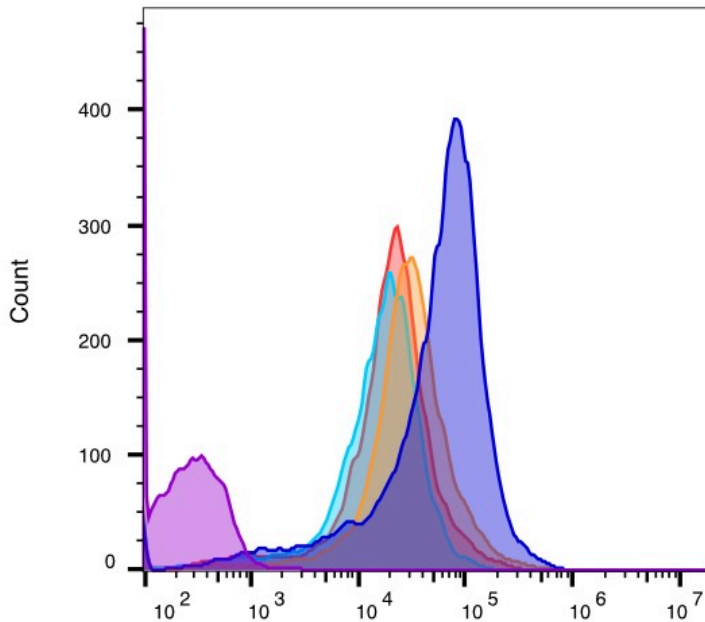

|   | Sample Name      |
|---|------------------|
| ■ | Cell only        |
| ■ | WGA-HRP          |
| ■ | WGA-HRP + GlcNAc |
| ■ | HRP              |
| ■ | HRP + GlcNAc     |

Streptavidin - 647

Supplement: supp [file elife-73982-supp-v1.zip]
